# Supplementary material for: Identifying Disease Signatures in the Spinocerebellar Ataxia Type 1 Mouse Cortex
Source: Cells. 2022 Aug 24;11(17):2632. doi: 10.3390/cells11172632 (PMC9454518; doi:10.3390/cells11172632)
Supplement: Supplementary file 1 [file cells-11-02632-s001.zip]

Archive with 6 entries (6 files):
- Luttik et al._SI.pdf
- Luttik et al._Table S1 [SCA1 cortex and cerebellum DEG list].xlsx
- Luttik et al._Table S2 [GO terms for downregulated DEGs in SCA1 cortex].xlsx
- Luttik et al._Table S3 [GO terms for upregulated DEGs in SCA1 cortex].xlsx
- Luttik et al._Table S4 [Shared and Unique GO of downregulated DEGs in SCA1 cortex and cerebellum].xlsx
- Luttik et al._Table S5 [Shared and Unique GO terms of upregulated DEGs in SCA1 cortex and cerebellum].xlsx
