# Supplementary material for: Identifying Disease Signatures in the Spinocerebellar Ataxia Type 1 Mouse Cortex
Source: Cells. 2022 Aug 24;11(17):2632. doi: 10.3390/cells11172632 (PMC9454518; doi:10.3390/cells11172632)
Supplement: Supplementary file 1 [file cells-11-02632-s001.zip › Luttik et al._Table S1 [SCA1 cortex and cerebellum DEG list].xlsx]

## Sheet: Cortex- Downregulated DEGs
Downregulated DEGs in SCA1 KI Cortex
Gene	baseMean	log2FoldChange	lfcSE	stat	pvalue	padj
Tspan11	596.887	-3.07021	0.178141	-17.2348	1.45646e-66	2.29377e-62
Gsg1l	1904.3	-1.61404	0.0950547	-16.9801	1.15234e-64	9.07406e-61
Camk2n1	56225.4	-1.44387	0.0858183	-16.8247	1.60918e-63	8.44764e-60
Lynx1	15372.5	-0.871336	0.0542195	-16.0705	4.10533e-58	1.61637e-54
Gpd1	4939.35	-1.22441	0.0779806	-15.7015	1.4772e-55	4.65288e-52
Hapln4	5756.93	-1.14022	0.0742632	-15.3538	3.33943e-53	8.76545e-50
Sema7a	8312.27	-1.16773	0.0812821	-14.3664	8.41326e-47	1.89286e-43
Mapk4	2823.37	-0.939425	0.0659817	-14.2377	5.34846e-46	1.05291e-42
Plk5	1030.6	-2.60061	0.184123	-14.1243	2.69069e-45	4.70841e-42
Rspo1	197.028	-2.73822	0.198194	-13.8159	2.04444e-43	3.21979e-40
Efhd2	6196.99	-1.00263	0.0734003	-13.6597	1.76658e-42	2.31849e-39
Map6d1	2498.42	-0.864239	0.0650258	-13.2907	2.62123e-40	3.17552e-37
Scrt1	8411.35	-0.754008	0.0573842	-13.1397	1.95102e-39	2.19475e-36
Kcnh3	3175.06	-0.94184	0.0717539	-13.126	2.33743e-39	2.45414e-36
Arpp19	8662.17	-1.09393	0.0840991	-13.0076	1.10723e-38	1.08986e-35
Mgll	7551.92	-0.873446	0.0688143	-12.6928	6.48264e-37	6.0056e-34
E130012A19Rik	1592.39	-1.75688	0.139237	-12.6179	1.68241e-36	1.47201e-33
Endou	112.222	-2.66815	0.215506	-12.3809	3.31786e-35	2.66226e-32
2022-09-05	17047.4	-0.676385	0.0546382	-12.3793	3.38087e-35	2.66226e-32
Hrh3	1404.93	-1.79422	0.145462	-12.3346	5.89533e-35	4.42122e-32
Kalrn	13458.5	-0.925348	0.0756152	-12.2376	1.95766e-34	1.40142e-31
Ttl	3122.83	-0.7483	0.061223	-12.2225	2.35657e-34	1.61363e-31
Afap1l1	1009.52	-0.978894	0.0801313	-12.2161	2.54979e-34	1.67319e-31
Adra1d	748.881	-1.55464	0.127703	-12.1739	4.28356e-34	2.69847e-31
Rph3a	17737.5	-0.960012	0.0789346	-12.1621	4.94572e-34	2.99577e-31
Scn4b	4562.7	-2.36317	0.196679	-12.0154	2.95087e-33	1.72123e-30
Mxra7	402.22	-1.17953	0.101553	-11.6149	3.46377e-31	1.94825e-28
Nrn1	7000.01	-1.01583	0.0880363	-11.5388	8.40933e-31	4.56685e-28
C130074G19Rik	1650.4	-1.35595	0.118472	-11.4453	2.48188e-30	1.3029e-27
Adcy9	3962.66	-0.811273	0.0711719	-11.3988	4.24038e-30	2.15425e-27
Gabrd	3721.55	-1.57013	0.138185	-11.3625	6.42526e-30	3.16223e-27
Plcb1	10133.7	-0.695735	0.0613712	-11.3365	8.65327e-30	4.12971e-27
Ddit4l	565.776	-2.46216	0.217605	-11.3148	1.10792e-29	5.13196e-27
Cabp1	3151.03	-0.936761	0.082943	-11.294	1.40444e-29	6.31959e-27
Camk2a	67263.5	-1.11771	0.0996421	-11.2172	3.35721e-29	1.46869e-26
Stard8	1064.66	-1.56064	0.139257	-11.2069	3.77381e-29	1.60632e-26
1110008P14Rik	1798.15	-1.21276	0.108273	-11.2009	4.03537e-29	1.67245e-26
Fbxw7	7161.98	-0.733839	0.0665062	-11.0341	2.61515e-28	1.05605e-25
Ano3	4524.41	-0.806133	0.0733364	-10.9923	4.16352e-28	1.63928e-25
Camkk2	11350.1	-1.28603	0.118933	-10.8131	2.98565e-27	1.14686e-24
Plxdc1	1705.27	-1.27211	0.11805	-10.776	4.46857e-27	1.67561e-24
Dgkz	20745.1	-0.957036	0.088942	-10.7602	5.30375e-27	1.94253e-24
Grm3	2310.36	-0.86935	0.0810091	-10.7315	7.24078e-27	2.59171e-24
Sipa1l1	12640.6	-0.880386	0.0820832	-10.7255	7.72471e-27	2.70348e-24
Nfic	7714.34	-0.828381	0.0774339	-10.6979	1.04106e-26	3.56426e-24
Git1	10557.9	-0.843995	0.0790255	-10.68	1.26229e-26	4.22975e-24
Lzts3	6024.49	-0.98807	0.0934897	-10.5688	4.15966e-26	1.3648e-23
Whrn	2351.42	-0.877097	0.0835087	-10.5031	8.3628e-26	2.68787e-23
Synpo	4458.78	-0.871342	0.0832431	-10.4674	1.21904e-25	3.83973e-23
Zfpm1	1154.23	-1.34083	0.128254	-10.4545	1.39702e-25	4.31406e-23
Asap1	5078.71	-0.748099	0.0719637	-10.3955	2.59908e-25	7.72319e-23
Lgi2	1733.54	-0.838634	0.0806652	-10.3965	2.57263e-25	7.72319e-23
Ccdc3	435.419	-1.5786	0.152186	-10.3728	3.29635e-25	9.61373e-23
Tmem132d	868.513	-1.31923	0.128444	-10.2709	9.53569e-25	2.68174e-22
Ly6e	5371.74	-0.709289	0.0692823	-10.2377	1.34436e-24	3.71444e-22
Nos1ap	2186.78	-0.858519	0.0843361	-10.1797	2.44226e-24	6.62181e-22
Ppme1	7448.86	-0.526888	0.0517662	-10.1782	2.48071e-24	6.62181e-22
Itpka	3462.79	-1.3904	0.136648	-10.175	2.56363e-24	6.72911e-22
Smad3	2758.59	-0.779223	0.0766595	-10.1647	2.84908e-24	7.35576e-22
Rgs20	1066.31	-0.801374	0.0789551	-10.1498	3.32201e-24	8.43843e-22
Ptpn3	2070.85	-0.759865	0.0749472	-10.1387	3.72098e-24	9.30185e-22
Cux1	5595.54	-0.687565	0.0681086	-10.0951	5.80563e-24	1.42864e-21
Kctd1	2447.5	-0.733091	0.0727128	-10.082	6.6358e-24	1.6078e-21
Gp1bb	277.617	-1.1692	0.116064	-10.0737	7.21778e-24	1.72231e-21
Grm2	1221.72	-1.42677	0.142568	-10.0077	1.41011e-23	3.31461e-21
Mapk6	4718.5	-0.628435	0.0628651	-9.99656	1.57786e-23	3.65436e-21
Fam43a	654.449	-1.16831	0.116928	-9.99173	1.65661e-23	3.78116e-21
Nell1	1508.98	-1.15999	0.116743	-9.93627	2.8946e-23	6.51244e-21
Pcp4	10127.6	-0.628655	0.0634247	-9.91183	3.69798e-23	8.08882e-21
Gm765	42.3265	-4.26964	0.430854	-9.9097	3.77771e-23	8.15002e-21
Gfra2	1963.76	-1.46462	0.148157	-9.88559	4.80726e-23	1.0231e-20
Them6	1557.57	-1.00847	0.102288	-9.85911	6.26009e-23	1.31454e-20
Kctd17	4039.64	-0.450756	0.0458732	-9.82613	8.68923e-23	1.80061e-20
Etl4	4219.17	-0.675634	0.0688158	-9.818	9.41959e-23	1.92661e-20
Cpne9	1868.14	-1.37714	0.140306	-9.81525	9.67948e-23	1.95439e-20
Tnnc1	116.847	-2.89853	0.295437	-9.811	1.00962e-22	2.01273e-20
R3hdm1	7632.46	-0.957367	0.0979871	-9.77034	1.50944e-22	2.97152e-20
Snap25	118806	-0.643452	0.0658995	-9.76413	1.60478e-22	3.12021e-20
Evc2	441.071	-1.12816	0.115734	-9.74781	1.88495e-22	3.62026e-20
Ttc7b	6696.88	-0.45828	0.0471684	-9.71582	2.58163e-22	4.84486e-20
Znfx1	2916.74	-0.73328	0.0754736	-9.71572	2.58409e-22	4.84486e-20
Kcnc3	19971.6	-0.79613	0.0822714	-9.67688	3.78089e-22	7.00533e-20
Rhobtb2	3855.67	-0.851562	0.0886573	-9.6051	7.60847e-22	1.37731e-19
Zfp703	1682.59	-0.800489	0.0839804	-9.53185	1.54504e-21	2.7651e-19
Syt2	7321.34	-0.921222	0.0968525	-9.51159	1.87763e-21	3.28565e-19
Coch	984.684	-0.977919	0.102805	-9.51239	1.86335e-21	3.28565e-19
Atf6	3948.63	-0.69175	0.0728428	-9.49649	2.1709e-21	3.75708e-19
Pdzrn3	1017.2	-0.808569	0.0852589	-9.48369	2.45455e-21	4.20181e-19
Sorbs2	5761.63	-0.732497	0.0773146	-9.47424	2.68703e-21	4.55032e-19
Ablim2	3495.16	-0.665152	0.0711231	-9.35212	8.59083e-21	1.43933e-18
Grin2a	1018.26	-1.21132	0.13022	-9.30215	1.37638e-20	2.27849e-18
Dio2	3131.74	-1.15635	0.124435	-9.29283	1.5024e-20	2.43932e-18
Kcnc1	17296.4	-0.804411	0.0866109	-9.28764	1.57742e-20	2.53498e-18
Nlk	4555.67	-0.852828	0.0923571	-9.23403	2.60625e-20	4.14605e-18
Dagla	4632.49	-0.856273	0.0928245	-9.22464	2.84512e-20	4.48078e-18
Nbl1	1999.88	-0.892553	0.0974384	-9.16018	5.18092e-20	8.07864e-18
Etnk2	178.589	-1.49773	0.163662	-9.15135	5.62241e-20	8.68111e-18
Cd6	51.1134	-3.11082	0.341734	-9.10304	8.78369e-20	1.33014e-17
Pdp1	5031.67	-1.31715	0.144755	-9.09921	9.09926e-20	1.3648e-17
Arhgef17	6958.31	-0.612346	0.0674081	-9.08417	1.04497e-19	1.55257e-17
Tuba4a	15918.4	-0.448434	0.0495603	-9.04825	1.4528e-19	2.11853e-17
Arpp21	9997.23	-0.610897	0.0675129	-9.0486	1.44812e-19	2.11853e-17
Aldh1l1	2194.9	-0.563975	0.0625579	-9.01524	1.96433e-19	2.78705e-17
Pamr1	731.701	-1.16944	0.129872	-9.00457	2.1651e-19	3.04448e-17
Prmt8	3542.13	-0.688833	0.0765769	-8.99531	2.3557e-19	3.25437e-17
Gria3	8600.49	-0.589271	0.0657921	-8.95656	3.34955e-19	4.58714e-17
Ppp4r4	1921.29	-0.736214	0.0826138	-8.91151	5.03409e-19	6.83465e-17
Prkcb	38719.9	-0.929848	0.10477	-8.87512	6.98598e-19	9.4036e-17
Kcna2	23201.4	-0.792307	0.0892943	-8.87299	7.12064e-19	9.50363e-17
Nat8l	15895.6	-0.784193	0.0886395	-8.84699	8.991e-19	1.18991e-16
Kcnh4	298.089	-1.56146	0.176824	-8.8306	1.04113e-18	1.36639e-16
Calm1	119776	-0.516811	0.0585405	-8.82827	1.06306e-18	1.38364e-16
Olfm1	28862.2	-0.887587	0.100611	-8.82198	1.1245e-18	1.45162e-16
Hkdc1	297.28	-1.39031	0.157745	-8.81367	1.21118e-18	1.5508e-16
Ube2ql1	6498.87	-0.426809	0.048521	-8.79637	1.41308e-18	1.79472e-16
Plcb4	7699.13	-0.636467	0.0726427	-8.76161	1.92489e-18	2.42521e-16
Pcsk2	12505.2	-0.590014	0.0673627	-8.75877	1.97388e-18	2.4672e-16
Slc39a10	9367.44	-0.868242	0.0997041	-8.70818	3.08783e-18	3.8152e-16
Trpc3	2893.18	-1.05262	0.120883	-8.70771	3.10081e-18	3.8152e-16
Chn1	23979.8	-0.712663	0.0821133	-8.67902	3.99202e-18	4.87367e-16
Wnt4	491.986	-1.11552	0.128938	-8.65158	5.07916e-18	6.10624e-16
Tmem200b	520.499	-1.42699	0.16508	-8.6442	5.41822e-18	6.46451e-16
Stard10	1953.17	-0.696949	0.0808662	-8.61855	6.78095e-18	8.02957e-16
Slc13a5	469.02	-0.798026	0.0926514	-8.61321	7.10424e-18	8.29447e-16
Rims3	2289.29	-0.954869	0.110862	-8.61312	7.10999e-18	8.29447e-16
Heg1	1083.05	-0.712278	0.0833195	-8.54876	1.24414e-17	1.43022e-15
Wnt9a	467.914	-1.11118	0.129996	-8.5478	1.25455e-17	1.43173e-15
Phospho1	1596.76	-0.740896	0.0868308	-8.53264	1.43045e-17	1.62074e-15
Kcna1	15244.9	-0.921269	0.108048	-8.52649	1.5086e-17	1.69706e-15
Slc24a2	27297.8	-0.863675	0.101324	-8.52388	1.5429e-17	1.72334e-15
Rasd1	140.467	-1.62788	0.191583	-8.49699	1.94572e-17	2.14287e-15
Epor	129.263	-1.44359	0.170085	-8.48746	2.11196e-17	2.30981e-15
Dusp7	2375.92	-0.85677	0.101387	-8.45053	2.89978e-17	3.14956e-15
Cacna1i	4855.57	-0.837417	0.099142	-8.44665	2.99788e-17	3.23381e-15
Ttll11	1239.08	-0.626147	0.0741711	-8.44193	3.12133e-17	3.34407e-15
Lingo1	7556.38	-1.07469	0.127567	-8.42449	3.62322e-17	3.85554e-15
Myl4	263.997	-2.12888	0.252983	-8.41511	3.92522e-17	4.14887e-15
Atp2b2	34922.8	-1.12283	0.13371	-8.39753	4.5595e-17	4.78717e-15
Trpc6	178.277	-1.21425	0.145	-8.37413	5.56333e-17	5.80245e-15
Sec14l1	8214.88	-0.73392	0.0876672	-8.37167	5.68075e-17	5.88593e-15
Bap1	5173.83	-0.388595	0.046879	-8.28933	1.13888e-16	1.14243e-14
Adam23	9795.16	-0.622394	0.0751397	-8.28316	1.19944e-16	1.19557e-14
Lasp1	6019.93	-0.387162	0.0468353	-8.26646	1.37997e-16	1.36687e-14
Kcnab3	2307.01	-1.17973	0.142844	-8.25886	1.47069e-16	1.44762e-14
Dlg4	22233.8	-0.517438	0.0626948	-8.25329	1.54098e-16	1.50739e-14
Jdp2	1180.7	-0.926104	0.112381	-8.24074	1.71147e-16	1.66382e-14
Camta2	10295.7	-0.683303	0.0830591	-8.22671	1.92433e-16	1.85928e-14
Scube1	1743.21	-1.78929	0.218157	-8.20184	2.36739e-16	2.27342e-14
Mei1	72.3355	-2.22133	0.271106	-8.19359	2.5355e-16	2.40552e-14
Lrrc8b	2393.14	-0.538155	0.0656765	-8.19403	2.52625e-16	2.40552e-14
Pacsin1	16887.9	-0.49195	0.0601534	-8.17826	2.87961e-16	2.71563e-14
Pitpnm2	6878.66	-0.667709	0.0821711	-8.12584	4.44267e-16	4.16474e-14
Pak1	20174.7	-0.572026	0.0705478	-8.10835	5.13137e-16	4.78189e-14
Chst2	5335.86	-0.516262	0.0638928	-8.08012	6.47023e-16	5.9941e-14
Spag5	582.938	-1.05778	0.131136	-8.06626	7.24855e-16	6.67587e-14
Npy	1208.42	-0.810594	0.100539	-8.06251	7.47459e-16	6.84403e-14
Herc6	496.294	-0.952175	0.118406	-8.04158	8.8685e-16	8.07341e-14
Fgf9	1473.44	-0.804247	0.100103	-8.03417	9.42137e-16	8.47869e-14
Dpy19l1	3836.15	-0.758094	0.0945195	-8.02051	1.05308e-15	9.42331e-14
Brinp1	7855.43	-0.657206	0.0819759	-8.01706	1.08307e-15	9.63687e-14
Hlf	8231.16	-0.868722	0.108468	-8.00901	1.15632e-15	1.02308e-13
Kcnh7	1298.11	-1.00415	0.125504	-8.00092	1.23488e-15	1.08649e-13
Camk4	27132.9	-1.01076	0.126414	-7.99567	1.28871e-15	1.12755e-13
Arc	4212.36	-1.42991	0.178893	-7.99313	1.31561e-15	1.14472e-13
Wfs1	2470.96	-1.01957	0.127835	-7.97566	1.51573e-15	1.3116e-13
Adcy1	66330.3	-0.88418	0.111349	-7.94059	2.01219e-15	1.73169e-13
Adam33	107.514	-2.50254	0.315463	-7.93292	2.14057e-15	1.83216e-13
Proser2	385.534	-1.31018	0.165688	-7.9075	2.62606e-15	2.222e-13
Itpr1	89070.5	-0.816759	0.103297	-7.90692	2.63835e-15	2.222e-13
Kcng4	2970.46	-0.974005	0.123168	-7.90792	2.61718e-15	2.222e-13
Ntn5	88.4301	-2.37547	0.301292	-7.88429	3.16337e-15	2.63597e-13
Wsb2	8870.22	-0.437228	0.0557324	-7.84514	4.32459e-15	3.56586e-13
Cux2	3100.93	-0.636929	0.0812645	-7.83773	4.5876e-15	3.76303e-13
Mybpc3	525.233	-2.85537	0.365597	-7.81016	5.71165e-15	4.66076e-13
Atp1a1	48628.1	-0.872164	0.111688	-7.80891	5.7684e-15	4.68281e-13
Plcxd2	9036.05	-0.893669	0.11446	-7.8077	5.82422e-15	4.70388e-13
Gpm6b	56168.1	-0.426214	0.0545948	-7.80686	5.86305e-15	4.71108e-13
Tex40	100.982	-1.51967	0.195068	-7.79045	6.67707e-15	5.33793e-13
Zmynd8	4228.12	-0.764342	0.0981704	-7.78587	6.92338e-15	5.50688e-13
Mast3	5517.79	-1.09857	0.141533	-7.76193	8.36496e-15	6.62009e-13
Plxnd1	3213.08	-1.04277	0.134403	-7.7585	8.59415e-15	6.76746e-13
Trim37	18087.2	-0.511544	0.0661091	-7.73788	1.01091e-14	7.88163e-13
Crip2	1919.24	-0.801823	0.1038	-7.72469	1.1213e-14	8.65656e-13
Cyfip2	38107	-0.489984	0.0634675	-7.72022	1.16125e-14	8.92126e-13
Lingo3	2025.32	-0.755969	0.0982858	-7.69154	1.45374e-14	1.11141e-12
Ccng1	3920.28	-0.510594	0.066413	-7.68817	1.49251e-14	1.13553e-12
Ppp3ca	26696.9	-0.698809	0.0909557	-7.68296	1.55455e-14	1.17705e-12
AI593442	6393.64	-0.932075	0.121404	-7.67749	1.62231e-14	1.21666e-12
4930429B21Rik	341.654	-1.04624	0.136402	-7.67025	1.71658e-14	1.28125e-12
Fam101b	1081.38	-1.34527	0.175909	-7.64751	2.04909e-14	1.51508e-12
Lrtm2	2159.97	-0.658008	0.0861924	-7.63418	2.27266e-14	1.67253e-12
Fam212b	3303.79	-0.847137	0.111039	-7.62919	2.36224e-14	1.73037e-12
Man1c1	2806.96	-0.639958	0.0838978	-7.62782	2.38751e-14	1.74078e-12
Sfxn5	9191.18	-0.553242	0.0726149	-7.61886	2.55927e-14	1.85742e-12
Bok	760.282	-1.09384	0.143716	-7.61118	2.71612e-14	1.96221e-12
Bsn	18349.7	-0.979927	0.128967	-7.59828	3.00086e-14	2.15802e-12
Nudt3	12022.9	-0.431605	0.0568624	-7.59034	3.1907e-14	2.28411e-12
Dlgap3	9745.29	-0.738392	0.0973609	-7.58407	3.34871e-14	2.38637e-12
Dnajc21	942.999	-1.24009	0.163568	-7.58148	3.41627e-14	2.42355e-12
Rap1gap2	9963.66	-0.481723	0.0636089	-7.57319	3.64167e-14	2.57187e-12
Dlgap1	24232.6	-0.64656	0.0854143	-7.5697	3.74089e-14	2.63014e-12
Chrdl1	775.325	-0.906804	0.119829	-7.56752	3.80427e-14	2.66282e-12
Senp2	4875.76	-0.376262	0.0498112	-7.55375	4.22897e-14	2.94699e-12
Rassf3	2216.12	-0.672809	0.0890897	-7.55204	4.28508e-14	2.97294e-12
Fam131b	8029.53	-0.491544	0.0651044	-7.5501	4.34941e-14	3.00433e-12
Prrt3	1743.67	-0.709551	0.0940576	-7.54379	4.5651e-14	3.13955e-12
St3gal5	5050.32	-0.606331	0.0804433	-7.53737	4.79538e-14	3.28358e-12
Atp2b1	23284.5	-0.50674	0.0672694	-7.53299	4.95914e-14	3.38102e-12
Rasd2	1832.89	-1.21538	0.16139	-7.5307	5.04702e-14	3.4261e-12
Paqr7	2453.8	-0.534438	0.071	-7.52729	5.18048e-14	3.5016e-12
S1pr1	7250.11	-0.349617	0.0465563	-7.50955	5.93302e-14	3.99312e-12
Scn8a	16596.2	-0.647915	0.08632	-7.50597	6.09747e-14	4.08634e-12
Zdhhc8	3797.75	-0.712272	0.0951826	-7.48321	7.25293e-14	4.79943e-12
Klc2	9578.74	-0.428575	0.0573032	-7.47907	7.48506e-14	4.93231e-12
Rims1	7010.96	-0.937012	0.125385	-7.47311	7.83222e-14	5.13957e-12
Igfbp4	1402.22	-1.02876	0.137682	-7.47201	7.89786e-14	5.16114e-12
Kif5c	45008.2	-0.503527	0.0674149	-7.46908	8.0757e-14	5.25554e-12
Aifm3	3599.5	-0.844187	0.113052	-7.46721	8.19114e-14	5.30874e-12
Rbfox1	15209.1	-0.512311	0.068715	-7.45559	8.94694e-14	5.77481e-12
Dusp14	1360.44	-0.863129	0.116174	-7.42965	1.08887e-13	6.94276e-12
Ddn	20079.4	-1.09499	0.147373	-7.43007	1.08542e-13	6.94276e-12
Dock3	12099	-0.482342	0.0651302	-7.40581	1.30351e-13	8.27782e-12
Gabra1	33256.3	-0.500154	0.0675612	-7.40298	1.33166e-13	8.42259e-12
Rgs8	25983.4	-1.00979	0.136575	-7.3937	1.42803e-13	8.996e-12
Apln	1074.68	-1.0455	0.141422	-7.39276	1.43812e-13	9.02348e-12
Ackr1	2176.68	-0.814435	0.110251	-7.38708	1.50092e-13	9.38014e-12
Tcap	68.3868	-3.14127	0.425668	-7.37962	1.5874e-13	9.88142e-12
Gucy2g	184.464	-1.23299	0.167457	-7.36303	1.79785e-13	1.11474e-11
Adora1	10158.8	-0.675007	0.0918734	-7.34714	2.02498e-13	1.24576e-11
Rin1	1009.22	-0.848131	0.115472	-7.34493	2.0587e-13	1.26009e-11
Arhgap32	13651.1	-0.597294	0.0813246	-7.34457	2.06427e-13	1.26009e-11
Gm12992	109.793	-1.53527	0.209105	-7.34212	2.10236e-13	1.27838e-11
Acap3	4112.33	-0.571499	0.077911	-7.33529	2.21245e-13	1.33502e-11
Dpp8	11364.7	-0.472327	0.06486	-7.28225	3.283e-13	1.96593e-11
Slc25a23	13229.2	-0.458513	0.0630225	-7.27538	3.45444e-13	2.06076e-11
Per3	1275.21	-0.915407	0.126242	-7.25118	4.13148e-13	2.45535e-11
Medag	1112.64	-0.859482	0.118748	-7.23788	4.55737e-13	2.69827e-11
Kcnk4	283.312	-1.26651	0.175227	-7.22785	4.9071e-13	2.89446e-11
Ankrd33b	2517.6	-1.10668	0.153134	-7.22686	4.94273e-13	2.90459e-11
Fmn1	995.741	-0.786848	0.108962	-7.22128	5.15015e-13	3.00501e-11
Galnt18	861.371	-0.555824	0.0769707	-7.22123	5.15178e-13	3.00501e-11
Rtn4r	2346.72	-0.970696	0.134543	-7.21474	5.40359e-13	3.14027e-11
Gucy1a3	3933.73	-0.439317	0.0610256	-7.1989	6.07009e-13	3.51462e-11
Psd	11300	-0.616991	0.0857702	-7.19353	6.31376e-13	3.62903e-11
Lmtk2	9898.28	-0.641871	0.0894124	-7.17877	7.03401e-13	4.02832e-11
9330102E08Rik	919.257	-0.822347	0.114906	-7.15672	8.26285e-13	4.71491e-11
Agmat	33.9286	-2.65151	0.370778	-7.15122	8.60127e-13	4.8903e-11
Astn2	4137.78	-0.751976	0.105161	-7.15069	8.63398e-13	4.89124e-11
Gm20063	97.2987	-1.3489	0.189257	-7.12733	1.02336e-12	5.77667e-11
Tmem56	5849.84	-0.827324	0.116351	-7.11057	1.15563e-12	6.50003e-11
Inf2	2925.66	-1.23034	0.173072	-7.10884	1.17022e-12	6.55866e-11
Krt222	2602.69	-0.518835	0.0730571	-7.10178	1.23164e-12	6.8784e-11
Zmiz2	9463.49	-0.47984	0.0676411	-7.09391	1.30379e-12	7.25564e-11
Pitpnm3	4819.39	-0.556882	0.0786405	-7.08136	1.42745e-12	7.91584e-11
Tef	10817.1	-0.670695	0.0948521	-7.07096	1.5387e-12	8.50281e-11
A330009N23Rik	224.593	-1.01389	0.143415	-7.06963	1.55345e-12	8.55429e-11
Tyro3	6445.29	-0.965583	0.136626	-7.06735	1.57915e-12	8.66553e-11
Syndig1	2868.74	-0.542065	0.0767366	-7.06397	1.61812e-12	8.84851e-11
Kcnb1	8179.56	-0.901701	0.127766	-7.05743	1.69604e-12	9.24255e-11
Fbxl16	27564.3	-0.632659	0.0898039	-7.0449	1.85596e-12	1.00791e-10
Pip5k1c	18678.8	-0.524518	0.0745924	-7.03179	2.03905e-12	1.10354e-10
Baalc	6824.63	-0.67194	0.0957484	-7.01777	2.2543e-12	1.21171e-10
Exph5	6551.75	-0.966066	0.137749	-7.01325	2.32847e-12	1.24309e-10
Rora	13407.8	-0.529421	0.0754855	-7.01355	2.32341e-12	1.24309e-10
Sowahb	1470.44	-1.20098	0.171407	-7.00661	2.44168e-12	1.29912e-10
5930412G12Rik	88.6176	-1.85208	0.264556	-7.00072	2.54653e-12	1.35034e-10
Car10	7669.25	-0.661249	0.0944654	-6.9999	2.56143e-12	1.35369e-10
Lypd6	1452.44	-0.698273	0.0998005	-6.99669	2.62077e-12	1.38042e-10
Il11ra1	752.568	-0.733554	0.104855	-6.99586	2.63642e-12	1.38403e-10
1700001O22Rik	85.887	-1.40535	0.200905	-6.99506	2.65146e-12	1.3873e-10
Abhd6	1937.12	-0.5134	0.0734155	-6.99308	2.68921e-12	1.40085e-10
Iqsec2	7419.43	-0.613489	0.087732	-6.99277	2.69515e-12	1.40085e-10
D430041D05Rik	9393.67	-0.772165	0.110494	-6.98831	2.78223e-12	1.44136e-10
Arhgef9	17531.5	-0.325392	0.0466044	-6.98201	2.90996e-12	1.50259e-10
Ap1s1	4599.68	-0.522778	0.0748863	-6.98095	2.93192e-12	1.50898e-10
Ppp2r2c	24380.4	-0.4436	0.0635955	-6.97534	3.05128e-12	1.5653e-10
Man2a1	965.159	-0.489626	0.0705339	-6.94171	3.87386e-12	1.97441e-10
Arhgap10	792.009	-0.697638	0.100628	-6.93283	4.12509e-12	2.09568e-10
Cacnb3	6587.07	-0.532535	0.0769071	-6.92439	4.37872e-12	2.21738e-10
Camkk1	3424.55	-0.616285	0.0890447	-6.92108	4.48218e-12	2.25527e-10
Slc30a4	4259.57	-0.405723	0.0586193	-6.92131	4.47487e-12	2.25527e-10
Ppp1r16b	9284.35	-0.944894	0.136627	-6.91587	4.65012e-12	2.32491e-10
Rgs7	3526.73	-0.512435	0.0741592	-6.90993	4.84891e-12	2.40901e-10
Obscn	87.2592	-2.18525	0.316897	-6.89578	5.35693e-12	2.64471e-10
Abcd2	3530.51	-0.496614	0.0721315	-6.88484	5.78533e-12	2.83842e-10
Phactr1	12387	-0.498503	0.072535	-6.87258	6.30526e-12	3.0839e-10
Lifr	2549.88	-0.779195	0.113403	-6.87101	6.37478e-12	3.10825e-10
Pmepa1	1607.76	-0.670413	0.0976782	-6.86348	6.72009e-12	3.2665e-10
Nrxn1	24472.4	-0.504847	0.0735976	-6.85956	6.90753e-12	3.34728e-10
Ngef	6379.71	-0.839177	0.122961	-6.82476	8.80741e-12	4.24183e-10
Golm1	1610.14	-0.599343	0.0878327	-6.82369	8.87293e-12	4.26036e-10
Tbc1d30	4034.39	-0.523163	0.0768718	-6.80565	1.00591e-11	4.81524e-10
Dpp10	10306	-0.479054	0.0704064	-6.80412	1.01669e-11	4.85206e-10
Rorb	2245.15	-0.899524	0.132285	-6.79989	1.04697e-11	4.98149e-10
Neto2	5464.51	-0.73194	0.107752	-6.79282	1.09963e-11	5.21629e-10
Igfbp5	6592.8	-0.720543	0.106537	-6.76334	1.34848e-11	6.37752e-10
Ppp1r9a	13200.3	-0.460998	0.0681676	-6.76272	1.35428e-11	6.38578e-10
Lrrc32	151.418	-1.4913	0.220767	-6.75511	1.42725e-11	6.6898e-10
Slc35e2	2806.75	-0.520938	0.0771226	-6.75468	1.43153e-11	6.68995e-10
Nptxr	2467.3	-1.18866	0.176029	-6.75264	1.4518e-11	6.76462e-10
Fstl4	718.385	-0.789143	0.116927	-6.74905	1.48817e-11	6.91362e-10
Rab6b	33670.9	-0.434191	0.0643608	-6.7462	1.51765e-11	7.02983e-10
Myo5c	123.819	-1.38259	0.205055	-6.74256	1.5562e-11	7.18725e-10
Fam168b	15508.9	-0.285841	0.0426332	-6.70465	2.01892e-11	9.29708e-10
Slc6a1	23494.6	-0.563792	0.084116	-6.70255	2.04813e-11	9.37674e-10
Pknox2	1920.81	-0.569587	0.0849774	-6.7028	2.0446e-11	9.37674e-10
Arap2	5045.46	-0.581763	0.0868185	-6.70091	2.07133e-11	9.45545e-10
Lyst	3347.57	-0.599334	0.0894747	-6.69837	2.10759e-11	9.56553e-10
Cdk16	14892.2	-0.416	0.0621601	-6.6924	2.19545e-11	9.93566e-10
Alox12b	66.4199	-3.20944	0.479888	-6.68788	2.26426e-11	1.02177e-09
Ppap2b	10603	-0.399147	0.0597674	-6.67835	2.41646e-11	1.08734e-09
Fam84a	2191.85	-0.733448	0.110336	-6.64741	2.98291e-11	1.3384e-09
Vwa1	937.262	-0.641382	0.0966506	-6.63609	3.22117e-11	1.4412e-09
Rasgef1b	1553.81	-0.998937	0.150765	-6.62578	3.45408e-11	1.54103e-09
Rbfox3	12791.6	-0.715358	0.107994	-6.62407	3.49432e-11	1.55458e-09
Scn1a	11483.6	-0.48956	0.074009	-6.61487	3.71879e-11	1.64515e-09
Slc24a4	428.966	-0.990832	0.149834	-6.61287	3.76928e-11	1.65817e-09
Gria4	14146	-0.409625	0.0619415	-6.6131	3.76358e-11	1.65817e-09
Sort1	18396.1	-0.650797	0.0985125	-6.60624	3.94215e-11	1.72939e-09
Gcnt4	404.77	-0.989121	0.149818	-6.60215	4.05236e-11	1.77279e-09
Gpr126	140.621	-1.31085	0.199122	-6.58315	4.60587e-11	2.00936e-09
Maf	1630.48	-0.660821	0.100403	-6.58169	4.65124e-11	2.02355e-09
Kif17	587.306	-0.547815	0.0832822	-6.57782	4.77388e-11	2.07118e-09
Dkkl1	327.585	-1.16823	0.17775	-6.57232	4.95376e-11	2.14332e-09
Gm9899	995.641	-0.756122	0.115082	-6.57028	5.02213e-11	2.16695e-09
Rilpl1	1321.13	-0.702456	0.106937	-6.56887	5.06974e-11	2.18151e-09
Erbb4	1082.6	-0.614248	0.0937892	-6.54925	5.7828e-11	2.47482e-09
Gpr133	117.878	-1.4103	0.215749	-6.53679	6.28551e-11	2.68267e-09
Ier5l	299.107	-1.47873	0.226406	-6.53132	6.51929e-11	2.77493e-09
Cdk5r2	10351.8	-0.462871	0.0708931	-6.52913	6.61523e-11	2.80817e-09
2022-09-03	23858.4	-0.430203	0.0659375	-6.5244	6.82725e-11	2.89039e-09
Fst	71.6559	-2.3068	0.353814	-6.51982	7.03938e-11	2.94849e-09
Gpr158	10969.3	-0.585597	0.0898142	-6.52009	7.02651e-11	2.94849e-09
Fut9	12174.7	-0.471703	0.072386	-6.5165	7.1966e-11	3.00635e-09
Slc16a6	572.051	-0.871306	0.133727	-6.51556	7.24196e-11	3.01729e-09
Lpcat4	3213.98	-0.530412	0.0814367	-6.51318	7.35753e-11	3.05736e-09
Fam198b	325.763	-0.849669	0.130643	-6.50375	7.83443e-11	3.24696e-09
Rapgefl1	4331.21	-0.501302	0.0771733	-6.49581	8.25903e-11	3.41395e-09
Pip5k1b	1733.18	-0.767956	0.118257	-6.49395	8.36119e-11	3.44713e-09
Smarcd1	5034.44	-0.446834	0.0688922	-6.48599	8.81512e-11	3.61535e-09
Tppp	18600	-0.500163	0.0771278	-6.48486	8.8814e-11	3.63307e-09
Gnl1	5764.86	-0.297864	0.0459666	-6.48001	9.17161e-11	3.74207e-09
Fjx1	2400.53	-0.506777	0.0782269	-6.47829	9.27662e-11	3.77513e-09
Rasl10a	456.661	-0.999484	0.154319	-6.47673	9.37338e-11	3.80468e-09
9430020K01Rik	4080.23	-0.74833	0.115594	-6.47379	9.55763e-11	3.86949e-09
Clec18a	94.9587	-1.53091	0.23658	-6.471	9.7358e-11	3.93152e-09
Zbtb7c	145.142	-1.31486	0.20324	-6.46949	9.83339e-11	3.96077e-09
Syne1	28463.2	-0.637689	0.0986933	-6.46132	1.03793e-10	4.16998e-09
Cplx2	49962.8	-0.800024	0.12386	-6.45908	1.05341e-10	4.22142e-09
Dab2ip	9781.19	-0.542142	0.084092	-6.44701	1.14079e-10	4.54844e-09
Stx1b	10203.7	-0.364511	0.0565395	-6.44701	1.14078e-10	4.54844e-09
Kcnip3	3959.44	-0.549483	0.0853054	-6.44136	1.18404e-10	4.70895e-09
Spcs3	3844.25	-0.512201	0.0795847	-6.43593	1.2272e-10	4.85606e-09
Akt2	3537.59	-0.67783	0.105667	-6.4148	1.41012e-10	5.53813e-09
Pgbd5	5489.41	-0.529817	0.0826273	-6.41213	1.43504e-10	5.62198e-09
Bmper	231.656	-1.00164	0.156267	-6.40979	1.45718e-10	5.69458e-09
Kcnma1	6501.27	-0.612433	0.0959209	-6.38477	1.71652e-10	6.65848e-09
Myo5a	28463.5	-0.397567	0.0622864	-6.38288	1.73789e-10	6.72481e-09
Neu2	141.576	-1.01012	0.15827	-6.38223	1.74526e-10	6.73678e-09
Iqsec1	13061.8	-0.436751	0.0684638	-6.3793	1.77897e-10	6.85012e-09
Zbtb18	24785.9	-0.661109	0.103716	-6.37424	1.83878e-10	7.06318e-09
Ldhd	430.427	-0.672734	0.105566	-6.37265	1.85787e-10	7.11912e-09
Inppl1	1382.4	-0.761279	0.119828	-6.35313	2.10983e-10	8.04546e-09
Mylk3	63.878	-1.82503	0.287436	-6.34932	2.16262e-10	8.22684e-09
Rnf39	174.754	-1.42896	0.225082	-6.3486	2.17282e-10	8.24572e-09
Sv2b	19979.3	-0.508223	0.0803185	-6.3276	2.49003e-10	9.42681e-09
Strbp	9777.93	-0.511102	0.0808602	-6.32081	2.602e-10	9.82708e-09
Olfr78	25.8321	-2.8983	0.458689	-6.31865	2.63858e-10	9.94138e-09
Ptn	7370.47	-0.520894	0.0827258	-6.29663	3.04181e-10	1.14061e-08
Nrsn1	10874.1	-0.809146	0.128647	-6.28966	3.18157e-10	1.19018e-08
Cntnap1	11755.2	-0.476683	0.0759172	-6.27899	3.40781e-10	1.27179e-08
Shank1	14976.3	-0.903123	0.143891	-6.27645	3.46388e-10	1.28966e-08
Diap2	1321.41	-0.448027	0.0713965	-6.2752	3.49177e-10	1.29393e-08
Lpgat1	16601.7	-0.475101	0.075738	-6.27296	3.54251e-10	1.30965e-08
Atrnl1	6489.06	-0.316967	0.0505976	-6.26447	3.74101e-10	1.37979e-08
Pacsin3	1303.78	-0.636365	0.101692	-6.25776	3.90557e-10	1.43712e-08
Vasn	305.357	-1.02078	0.163134	-6.25729	3.91719e-10	1.43804e-08
Rapgef4	20404.8	-0.403548	0.0646007	-6.24681	4.18911e-10	1.53429e-08
A830010M20Rik	6642.56	-0.552954	0.0885371	-6.24545	4.22592e-10	1.54418e-08
Atp2a2	52294.5	-0.529798	0.0849146	-6.23918	4.39863e-10	1.60356e-08
Ppp1r37	4932.44	-0.481018	0.0772253	-6.22876	4.70127e-10	1.70994e-08
Brinp2	2975.39	-0.355458	0.0573007	-6.20339	5.52612e-10	2.00071e-08
Spire1	9166.91	-0.307114	0.0495324	-6.20027	5.63663e-10	2.03604e-08
Btbd17	869.57	-0.711451	0.114763	-6.1993	5.67136e-10	2.0439e-08
Man1a2	6772.01	-0.405279	0.0655224	-6.18535	6.19634e-10	2.22799e-08
Hfe2	33.3801	-2.2471	0.363729	-6.17794	6.49449e-10	2.32459e-08
Adap1	6134.6	-0.344822	0.0558218	-6.17719	6.52507e-10	2.33024e-08
Syt7	14056.7	-0.483631	0.0783896	-6.16958	6.8473e-10	2.43978e-08
Pvrl3	976.937	-0.640781	0.103989	-6.16199	7.18379e-10	2.54814e-08
Sptbn2	39122.4	-0.69025	0.11211	-6.15692	7.41754e-10	2.62514e-08
Gabrb2	22986.6	-0.486297	0.0790285	-6.15345	7.58175e-10	2.67318e-08
Cox6a2	107.986	-1.2533	0.203678	-6.15333	7.58722e-10	2.67318e-08
Glul	52412.7	-0.524152	0.0852727	-6.14677	7.90755e-10	2.77982e-08
Pld5	1929.22	-0.757544	0.123307	-6.14358	8.06845e-10	2.83007e-08
Cyp39a1	144.258	-1.26889	0.206571	-6.14264	8.11617e-10	2.84048e-08
Sowaha	2716.92	-0.674404	0.110024	-6.12962	8.80887e-10	3.06927e-08
Ttyh1	19631.5	-0.309577	0.0505345	-6.12605	9.00847e-10	3.13189e-08
Cacna2d3	2988.07	-0.600837	0.0981398	-6.12226	9.22598e-10	3.20044e-08
Myrip	2295.88	-0.46457	0.0759325	-6.1182	9.46409e-10	3.27582e-08
Cntn4	2419.12	-0.480351	0.0785834	-6.11264	9.79987e-10	3.38461e-08
Rgs16	379.635	-0.832752	0.136274	-6.11087	9.90923e-10	3.41489e-08
Osbp2	4294.63	-0.593338	0.0971928	-6.10475	1.0296e-09	3.53436e-08
Epb4.1l1	22798.3	-0.539601	0.088431	-6.10195	1.04785e-09	3.58753e-08
Cry2	4783.13	-0.419056	0.0687477	-6.09557	1.09046e-09	3.72531e-08
Brinp3	1246.06	-0.63522	0.104228	-6.09451	1.09776e-09	3.73403e-08
Ptgfrn	1591.43	-0.793184	0.130414	-6.08206	1.18647e-09	4.0271e-08
Map1a	51508.2	-0.569147	0.0936525	-6.07722	1.22282e-09	4.14156e-08
Chrnb3	65.7284	-2.3646	0.389627	-6.06889	1.28801e-09	4.35297e-08
Farp1	2725.16	-0.517333	0.0852531	-6.0682	1.29355e-09	4.36233e-08
Incenp	577.668	-0.593814	0.0980597	-6.05564	1.39863e-09	4.68662e-08
Slc1a3	38106.9	-0.475988	0.0787157	-6.04692	1.4764e-09	4.9367e-08
Mmp17	4150.89	-0.713994	0.118135	-6.04389	1.5044e-09	5.01966e-08
Nr3c1	6639.35	-0.4485	0.0743145	-6.03516	1.58804e-09	5.27638e-08
Gpr37l1	12282.1	-0.405553	0.0672334	-6.03201	1.61928e-09	5.36885e-08
Dusp1	1280.41	-0.948754	0.157354	-6.02945	1.64523e-09	5.44343e-08
Mpl	16.9678	-3.45312	0.573391	-6.02228	1.71977e-09	5.67811e-08
Daglb	1499.13	-0.489463	0.0814008	-6.01299	1.8213e-09	5.98823e-08
Vamp1	9001.84	-0.864812	0.143819	-6.01318	1.8192e-09	5.98823e-08
Extl1	1608.55	-0.637646	0.106091	-6.01039	1.85077e-09	6.07246e-08
Nsmf	9626.89	-0.508849	0.0847849	-6.00164	1.9533e-09	6.39554e-08
Arf3	34228.3	-0.336055	0.0560826	-5.99214	2.07103e-09	6.75292e-08
Cdk19	6812.41	-0.469965	0.0784582	-5.99	2.09837e-09	6.82794e-08
Jsrp1	52.0663	-1.93149	0.322552	-5.98814	2.1225e-09	6.89222e-08
Myh7b	306.963	-0.93713	0.156578	-5.98509	2.16276e-09	7.0085e-08
Btbd10	3116.63	-0.521212	0.0871272	-5.9822	2.2015e-09	7.11937e-08
Mpp3	3412.18	-0.68214	0.114082	-5.97937	2.23998e-09	7.22897e-08
Rnf144a	1447.9	-0.53718	0.0899954	-5.96897	2.3876e-09	7.68964e-08
Ppm1k	4118.66	-0.416581	0.0697963	-5.96853	2.39406e-09	7.69469e-08
Klhl2	4834.02	-0.305687	0.0512329	-5.96662	2.42221e-09	7.76933e-08
Rgs7bp	18094.7	-0.541827	0.0908186	-5.96604	2.43084e-09	7.78117e-08
Pde7b	1452.76	-0.779174	0.130674	-5.96271	2.48084e-09	7.92511e-08
Luzp1	6466.93	-0.601974	0.101114	-5.95342	2.62594e-09	8.37014e-08
AI414108	1880.29	-1.3084	0.220043	-5.94611	2.74598e-09	8.71903e-08
Cntnap5b	1225.61	-0.763788	0.128526	-5.94269	2.80377e-09	8.88462e-08
D17Wsu92e	10265.1	-0.414719	0.0698759	-5.93508	2.9371e-09	9.28843e-08
Fbxo34	2295.2	-0.46428	0.0784876	-5.91532	3.31223e-09	1.04329e-07
Tfrc	5673.65	-0.523039	0.0886283	-5.90149	3.60234e-09	1.13014e-07
Ssbp3	5172.51	-0.393836	0.0667582	-5.89944	3.64744e-09	1.14202e-07
Tmem132a	10374.7	-0.791196	0.134131	-5.89868	3.66413e-09	1.14416e-07
Ash1l	8875.36	-0.416559	0.0706214	-5.89847	3.66882e-09	1.14416e-07
Rassf2	3013.12	-0.486893	0.0826736	-5.88934	3.87736e-09	1.20443e-07
Calm3	49442	-0.289577	0.0492448	-5.88036	4.09374e-09	1.26874e-07
Hey1	1890.22	-0.48162	0.0821006	-5.86622	4.45853e-09	1.37143e-07
Ppp3r1	32203.3	-0.389316	0.06648	-5.85614	4.73763e-09	1.45444e-07
2022-09-07	18629.2	-0.440612	0.0753831	-5.84497	5.0665e-09	1.55238e-07
Tbc1d22a	1100.21	-0.44424	0.0760208	-5.84366	5.10664e-09	1.55861e-07
Pak7	2601.08	-0.690527	0.118163	-5.84387	5.10029e-09	1.55861e-07
Cds1	5775.35	-0.42129	0.0721334	-5.84042	5.20685e-09	1.58613e-07
Kcnh5	854.591	-1.20473	0.206485	-5.83449	5.39568e-09	1.64047e-07
Gabbr2	10427.7	-0.552628	0.0947717	-5.83116	5.50449e-09	1.67033e-07
D1Ertd622e	2421.11	-0.508497	0.0872157	-5.83033	5.53172e-09	1.67537e-07
Hspa1b	126.781	-1.30576	0.224427	-5.81817	5.94942e-09	1.79154e-07
Gm10635	61.9016	-2.70005	0.464251	-5.81592	6.03007e-09	1.81236e-07
Prrt2	10926.4	-0.610655	0.105038	-5.81365	6.11244e-09	1.83362e-07
Ttll7	13521.3	-0.352274	0.0606417	-5.8091	6.28078e-09	1.88053e-07
Paqr8	9504.08	-0.447356	0.0771278	-5.80019	6.62383e-09	1.97948e-07
Rgs4	10272.6	-1.09755	0.189438	-5.79371	6.88497e-09	2.05362e-07
Otud3	327.122	-0.636852	0.10998	-5.79062	7.01287e-09	2.08782e-07
Rtn4rl1	2812.61	-0.705168	0.121835	-5.78787	7.12826e-09	2.11817e-07
Kcnj6	1173.05	-0.655627	0.113307	-5.78627	7.19672e-09	2.13448e-07
Ubqln4	4634.15	-0.491445	0.0851308	-5.77282	7.79558e-09	2.30775e-07
Cinp	1202.56	-0.452546	0.0784174	-5.77099	7.88072e-09	2.32858e-07
Hapln1	877.362	-0.899668	0.156045	-5.76544	8.14432e-09	2.40196e-07
Slc23a3	18.6843	-2.84267	0.493304	-5.7625	8.28766e-09	2.43967e-07
Fam78a	232.152	-0.839243	0.145676	-5.76101	8.3611e-09	2.4567e-07
Crhbp	380.421	-0.635021	0.110287	-5.75787	8.51834e-09	2.49824e-07
Trhr2	42.547	-2.03267	0.353435	-5.75117	8.86289e-09	2.59445e-07
Kcnh1	3993.52	-0.733059	0.127522	-5.74848	9.00512e-09	2.6312e-07
Cxxc5	4863.08	-0.555984	0.0967247	-5.74811	9.02462e-09	2.63201e-07
Foxk1	2678.83	-0.370191	0.0644304	-5.74559	9.16002e-09	2.66657e-07
Ccdc88c	703.02	-0.75124	0.130962	-5.73632	9.67576e-09	2.8115e-07
Mfap3l	3838.08	-0.426031	0.0743361	-5.73114	9.97579e-09	2.89335e-07
Cacng3	2330.33	-0.570469	0.0996076	-5.72717	1.02123e-08	2.95649e-07
Hsd11b1	1455.32	-0.497484	0.0869679	-5.72032	1.06325e-08	3.06687e-07
Efcab6	152.624	-0.875877	0.15328	-5.71422	1.1021e-08	3.17311e-07
Hs6st3	540.523	-0.702706	0.123242	-5.70182	1.18532e-08	3.39906e-07
Znrf1	4955.45	-0.450721	0.079052	-5.70158	1.18705e-08	3.39906e-07
Ptprd	11681.9	-0.419053	0.0735238	-5.69955	1.20123e-08	3.43343e-07
Dusp18	1073.17	-0.524415	0.0920595	-5.69648	1.22308e-08	3.48322e-07
Clec11a	130.911	-0.932889	0.163758	-5.69674	1.22119e-08	3.48322e-07
Ntm	7806.23	-0.335134	0.0588629	-5.69348	1.24479e-08	3.53867e-07
Dmtn	8793.25	-0.480102	0.084334	-5.69287	1.24921e-08	3.54483e-07
Clstn1	50966.7	-0.437618	0.0769775	-5.68501	1.30803e-08	3.70507e-07
Ptprm	2789.85	-0.505092	0.0888939	-5.68197	1.33152e-08	3.76483e-07
Cadm4	8948.03	-0.415502	0.0731335	-5.68143	1.33577e-08	3.77008e-07
Dlx1as	339.861	-1.24019	0.218626	-5.67266	1.40598e-08	3.95407e-07
Grid2ip	1472.72	-0.983956	0.173592	-5.66822	1.44291e-08	4.04349e-07
Mras	7061.18	-0.399602	0.0705381	-5.66504	1.46988e-08	4.11174e-07
Adarb1	14057.4	-0.5242	0.0925544	-5.66369	1.48149e-08	4.13688e-07
Fgd6	1013.26	-0.470129	0.0830311	-5.66209	1.49544e-08	4.16843e-07
6030419C18Rik	6126.55	-0.447674	0.0790706	-5.66169	1.49888e-08	4.17066e-07
Olfr464	15.7861	-3.1424	0.555302	-5.65891	1.52333e-08	4.23121e-07
Vgll4	364.683	-0.745635	0.131785	-5.65797	1.53175e-08	4.2471e-07
Efna5	1302.07	-0.733475	0.129664	-5.65671	1.543e-08	4.27078e-07
Abhd17a	3730.89	-0.406602	0.0718878	-5.65606	1.54889e-08	4.27956e-07
Specc1	4999.36	-0.556562	0.0984295	-5.65442	1.56372e-08	4.31295e-07
Glrb	13091.3	-0.371695	0.0657649	-5.65187	1.58709e-08	4.36977e-07
Lrrc4	4630.7	-0.495437	0.0877275	-5.64745	1.62842e-08	4.47574e-07
Dnajc16	2337.61	-0.344465	0.0610242	-5.64474	1.65435e-08	4.53908e-07
Syt1	51475.2	-0.354386	0.062799	-5.64319	1.66929e-08	4.57212e-07
Adra1b	501.152	-0.960806	0.170746	-5.62709	1.83273e-08	4.99373e-07
Josd1	2844.27	-0.370292	0.0658238	-5.6255	1.84968e-08	5.0312e-07
2010300C02Rik	5247.57	-0.507618	0.0902974	-5.62163	1.89165e-08	5.1365e-07
Rasgrp1	13071.7	-0.491375	0.087413	-5.62131	1.89519e-08	5.13724e-07
Trp53i11	2706.96	-0.812417	0.144647	-5.61654	1.94822e-08	5.27192e-07
E030003E18Rik	818.529	-0.613202	0.10935	-5.60772	2.05009e-08	5.52858e-07
Kctd15	415.099	-0.730115	0.130347	-5.60132	2.12727e-08	5.72689e-07
Megf9	4416.81	-0.344468	0.0615123	-5.59998	2.14377e-08	5.76147e-07
Fbxo18	2885.14	-0.264568	0.0472486	-5.59949	2.14985e-08	5.76797e-07
Ramp3	338.898	-1.00477	0.179632	-5.59352	2.22514e-08	5.95982e-07
Jph3	9122.66	-0.438174	0.0783582	-5.59193	2.24553e-08	6.00422e-07
Cnksr2	9310.44	-0.603621	0.108041	-5.58696	2.31083e-08	6.16836e-07
Plch2	6414.28	-0.880178	0.15763	-5.58381	2.35304e-08	6.27039e-07
Snph	9747.13	-0.466768	0.0836506	-5.57998	2.40549e-08	6.39935e-07
Rims4	1119.28	-0.57773	0.103596	-5.57675	2.45055e-08	6.50822e-07
Trhde	2055.34	-0.74283	0.133358	-5.57018	2.54476e-08	6.74704e-07
Golga7b	5237.48	-0.428872	0.0769984	-5.56988	2.54909e-08	6.74716e-07
Prex2	6700.51	-0.387	0.0695951	-5.56074	2.68638e-08	7.08672e-07
Shank3	10963.5	-0.671874	0.120838	-5.56012	2.69594e-08	7.10007e-07
Diras2	20995.7	-0.622806	0.112036	-5.55897	2.71365e-08	7.13476e-07
Pcdhgc5	2581.6	-0.661987	0.119092	-5.5586	2.71949e-08	7.13821e-07
Slc25a18	2102.3	-0.518486	0.0934008	-5.5512	2.83723e-08	7.43485e-07
Slc25a37	1006.41	-0.505006	0.0909904	-5.5501	2.85512e-08	7.46933e-07
Fbxo31	4016.13	-0.362444	0.0653155	-5.54912	2.87112e-08	7.49872e-07
Hspa12a	8641.85	-0.483735	0.0872233	-5.54594	2.92372e-08	7.62345e-07
Gpr153	1207.6	-1.69448	0.305639	-5.54404	2.95577e-08	7.69428e-07
Pou6f1	4499.67	-0.283804	0.0512919	-5.53312	3.14586e-08	8.14872e-07
Col19a1	1227.43	-0.671134	0.121374	-5.52947	3.21191e-08	8.30613e-07
Tmem132c	986.546	-0.631597	0.114407	-5.52062	3.37812e-08	8.70736e-07
Ryr1	1176.06	-0.945832	0.171349	-5.51992	3.39162e-08	8.72789e-07
Homer1	5439.59	-1.03143	0.187206	-5.50957	3.59716e-08	9.21166e-07
Hivep2	11988.3	-0.58047	0.105384	-5.50816	3.62599e-08	9.24978e-07
Atxn7l3	9245.79	-0.341111	0.0619302	-5.50798	3.62967e-08	9.24978e-07
Myo18a	5985.74	-0.527853	0.0958898	-5.50479	3.69606e-08	9.40376e-07
Stac2	2986.96	-0.840238	0.152695	-5.50271	3.73994e-08	9.50005e-07
Tmem44	1772.04	-0.720962	0.131414	-5.4862	4.10678e-08	1.04151e-06
Jph4	10356.7	-0.546318	0.0996531	-5.4822	4.20068e-08	1.06361e-06
Sptb	13746	-0.672924	0.1228	-5.47983	4.25737e-08	1.07451e-06
Chst1	4889.69	-0.567072	0.103479	-5.48005	4.25198e-08	1.07451e-06
Sbno1	7797.61	-0.584658	0.106841	-5.47222	4.44422e-08	1.11808e-06
Scn1b	18682	-0.58714	0.107294	-5.47224	4.44387e-08	1.11808e-06
Ext1	1685.68	-0.374977	0.0685417	-5.47079	4.48035e-08	1.12358e-06
AI464131	1424.81	-0.381325	0.0697017	-5.47082	4.47961e-08	1.12358e-06
Zbtb16	874.342	-0.948694	0.173466	-5.46905	4.5246e-08	1.13288e-06
Arhgef10l	2540.5	-0.449169	0.0822952	-5.45802	4.81467e-08	1.20168e-06
Bhlhe40	3871.05	-1.01673	0.186469	-5.45257	4.9647e-08	1.23717e-06
Chrm1	3891.56	-0.618534	0.113493	-5.44999	5.03713e-08	1.25323e-06
Vwa5b1	116.38	-1.62442	0.298139	-5.44854	5.07849e-08	1.26153e-06
Vip	817.904	-0.982527	0.180519	-5.44278	5.24554e-08	1.30098e-06
Tesc	1329.83	-0.784654	0.144199	-5.44145	5.28483e-08	1.30866e-06
Cckbr	1077.81	-0.858921	0.157915	-5.43912	5.35441e-08	1.32381e-06
Ldlrad4	1391.11	-0.441215	0.0812966	-5.42722	5.72377e-08	1.4107e-06
Gls	14015.6	-0.326148	0.0601182	-5.42511	5.79195e-08	1.42527e-06
D630045J12Rik	2607.73	-0.497092	0.091675	-5.42232	5.88294e-08	1.4454e-06
C2cd4c	376.982	-0.841722	0.155545	-5.41143	6.25224e-08	1.53375e-06
Otof	525.974	-0.990105	0.183048	-5.409	6.33773e-08	1.5523e-06
Actn4	4974.57	-0.4422	0.0817655	-5.40814	6.36812e-08	1.55491e-06
Zmiz1	8381.59	-0.526144	0.097358	-5.40422	6.509e-08	1.58419e-06
Atmin	3468.78	-0.380591	0.0704795	-5.40003	6.66309e-08	1.6169e-06
Nptn	29156.5	-0.308305	0.0571273	-5.39681	6.78359e-08	1.64361e-06
Gm2115	524.026	-1.17429	0.217712	-5.39377	6.89943e-08	1.66911e-06
Prss23	513.858	-0.90866	0.168765	-5.38417	7.27808e-08	1.75532e-06
Lrrk2	2658.22	-0.88297	0.164353	-5.37239	7.77018e-08	1.8626e-06
Lcat	1460.23	-0.566548	0.105471	-5.37162	7.80324e-08	1.86768e-06
Sacs	550.958	-0.581285	0.108268	-5.36896	7.91926e-08	1.89257e-06
Mettl7a1	1136.46	-0.402444	0.0749806	-5.36731	7.99174e-08	1.907e-06
Megf11	4082.16	-1.14648	0.213737	-5.36397	8.14116e-08	1.93971e-06
C1ra	53.0731	-1.32262	0.246871	-5.35752	8.43732e-08	2.00421e-06
Csrp2bp	1253.68	-0.371629	0.0694024	-5.35469	8.57016e-08	2.0327e-06
D830031N03Rik	427.172	-0.705639	0.132268	-5.33493	9.55835e-08	2.25689e-06
Mapk10	15504.1	-0.381794	0.0716494	-5.32864	9.89525e-08	2.32945e-06
Gfod1	7831.42	-0.763822	0.143655	-5.31706	1.05458e-07	2.4789e-06
Cdk2ap1	792.816	-0.551775	0.103822	-5.31465	1.06864e-07	2.50819e-06
Ctnnd2	9354.7	-0.353341	0.0664939	-5.31388	1.07317e-07	2.51004e-06
Syt12	2600.49	-0.672022	0.12647	-5.3137	1.07421e-07	2.51004e-06
Slc1a2	108761	-0.776334	0.146095	-5.31391	1.073e-07	2.51004e-06
Parm1	1061.47	-0.61685	0.116098	-5.31318	1.07731e-07	2.51357e-06
Gpr83	277.482	-1.38043	0.259869	-5.31202	1.08414e-07	2.52576e-06
Ppp1r9b	28549.2	-0.568291	0.107046	-5.30885	1.10321e-07	2.56566e-06
Foxk2	5130.09	-0.339566	0.063965	-5.30863	1.10453e-07	2.56566e-06
Thrsp	915.858	-0.767036	0.144509	-5.30788	1.10907e-07	2.57241e-06
Erc2	4956.17	-0.496275	0.0935348	-5.30577	1.12196e-07	2.59849e-06
Fam107a	22032.9	-0.620636	0.116984	-5.30531	1.1248e-07	2.60126e-06
Fn3k	861.813	-0.389285	0.0735069	-5.2959	1.1843e-07	2.72684e-06
Tle6	89.8349	-0.929896	0.175615	-5.29509	1.18959e-07	2.73271e-06
C030013G03Rik	32.3114	-1.65607	0.312763	-5.29498	1.19032e-07	2.73271e-06
Adam9	2850.11	-0.319582	0.0603921	-5.29179	1.21128e-07	2.77678e-06
Asphd2	2102.16	-0.370333	0.0700041	-5.29016	1.22209e-07	2.79747e-06
Hhatl	524.289	-0.61291	0.115901	-5.28823	1.23505e-07	2.82305e-06
C920025E04Rik	15.6691	-3.20192	0.605895	-5.28461	1.25975e-07	2.87534e-06
Fbxo32	830.095	-0.833926	0.157827	-5.28379	1.26541e-07	2.88407e-06
Klf16	1150.81	-0.456649	0.0864298	-5.28347	1.26762e-07	2.88493e-06
Tspan5	8542.91	-0.611433	0.115753	-5.2822	1.27639e-07	2.90069e-06
Strip2	5005.16	-0.87729	0.166217	-5.27797	1.3062e-07	2.9599e-06
D8Ertd82e	2366.01	-0.99986	0.189477	-5.27694	1.31356e-07	2.97232e-06
Trabd2b	642.473	-0.884418	0.167623	-5.27624	1.31862e-07	2.97948e-06
Pi4ka	11603.1	-0.396998	0.0752626	-5.27484	1.32869e-07	2.99793e-06
Rab11fip4	5650.97	-0.516256	0.0979034	-5.27311	1.34129e-07	3.02203e-06
Dact3	5159.55	-0.489795	0.0930742	-5.26241	1.42178e-07	3.19881e-06
Kcnip2	2359.11	-0.828635	0.157649	-5.25619	1.47074e-07	3.30424e-06
Acsl6	8018.15	-0.297899	0.0567217	-5.25194	1.50509e-07	3.3766e-06
Agpat3	9864.8	-0.337847	0.0643461	-5.25046	1.51718e-07	3.39888e-06
Cap2	8645.14	-0.473752	0.0902549	-5.24904	1.5289e-07	3.42026e-06
Wwc1	2615.88	-0.478367	0.0912063	-5.24489	1.56377e-07	3.49331e-06
Plagl1	975.564	-0.408518	0.0779155	-5.24309	1.57909e-07	3.52254e-06
Tusc5	26.5955	-1.8471	0.352521	-5.23969	1.60843e-07	3.58291e-06
Ube3b	4930.38	-0.362905	0.0692713	-5.23889	1.61543e-07	3.58835e-06
Mesdc1	1661.94	-0.480152	0.0916475	-5.23912	1.61345e-07	3.58835e-06
Nefm	8383.02	-0.812629	0.155124	-5.23857	1.61829e-07	3.58964e-06
Acap2	4008.79	-0.325532	0.0621582	-5.23716	1.63068e-07	3.61205e-06
Aldh1a1	4676.42	-0.441416	0.0843085	-5.23572	1.6434e-07	3.6351e-06
Unc80	22627.2	-0.415246	0.0793217	-5.23496	1.65023e-07	3.64509e-06
Kctd6	1027.79	-0.493241	0.094458	-5.2218	1.77192e-07	3.90606e-06
Hes3	759.476	-1.99023	0.38115	-5.22165	1.77334e-07	3.90606e-06
Nyap2	731.081	-0.507632	0.0972357	-5.22063	1.78315e-07	3.9167e-06
Myh2	16.9344	-2.32	0.44438	-5.22075	1.78197e-07	3.9167e-06
Tmem184b	3440.84	-0.311679	0.0597514	-5.21626	1.82572e-07	3.99906e-06
Slc12a5	27584.6	-0.330766	0.0634637	-5.2119	1.86921e-07	4.07415e-06
Brsk2	8422.04	-0.374954	0.0719435	-5.21178	1.87035e-07	4.07415e-06
Sirpa	18164.9	-0.349177	0.0670917	-5.20448	1.94544e-07	4.23186e-06
Lmo4	4798.47	-0.553904	0.106448	-5.20351	1.95559e-07	4.24809e-06
Hunk	1106.69	-0.788717	0.151909	-5.19203	2.08012e-07	4.51238e-06
Prkar1b	24580.8	-0.337607	0.0650702	-5.18835	2.12165e-07	4.59613e-06
Hr	3133.57	-0.631597	0.121756	-5.18741	2.1324e-07	4.61306e-06
Lpl	419.807	-1.03284	0.199119	-5.18703	2.13675e-07	4.61615e-06
Net1	1058.6	-0.962034	0.185491	-5.18641	2.14388e-07	4.62521e-06
Prkcz	9240.55	-0.391048	0.0754246	-5.18462	2.16454e-07	4.65702e-06
Rasgef1a	7374.9	-0.354127	0.0683017	-5.18474	2.16313e-07	4.65702e-06
Plekho1	1378.11	-0.511506	0.0987123	-5.18178	2.19776e-07	4.72203e-06
Rgs14	836.984	-0.616133	0.119037	-5.176	2.26693e-07	4.8574e-06
Plxna2	5344.37	-0.560711	0.108451	-5.17017	2.33879e-07	5.00019e-06
Mfge8	3779.44	-0.377377	0.0729924	-5.17008	2.33992e-07	5.00019e-06
Pigz	356.708	-0.662493	0.128283	-5.1643	2.4134e-07	5.14325e-06
Pip4k2c	4833.06	-0.397236	0.076948	-5.16239	2.43814e-07	5.18896e-06
Mertk	1193.88	-0.660213	0.12792	-5.16113	2.45466e-07	5.21003e-06
Abr	17373	-0.354004	0.0687006	-5.15286	2.56548e-07	5.43791e-06
Apbb1	14102.8	-0.334042	0.0648379	-5.15196	2.57777e-07	5.45663e-06
Pcdhac1	175.318	-1.13671	0.220672	-5.15111	2.58945e-07	5.47399e-06
Grasp	923.539	-0.754307	0.146452	-5.15054	2.5974e-07	5.48343e-06
Bai2	10111.1	-0.541274	0.105211	-5.14463	2.68051e-07	5.65132e-06
Cxcl14	2987.3	-0.578191	0.112529	-5.13815	2.7745e-07	5.84166e-06
Ptprt	7440.65	-0.665205	0.129549	-5.13476	2.82506e-07	5.94016e-06
Nrcam	13302.7	-0.391586	0.0763142	-5.13123	2.87849e-07	6.02837e-06
Wee1	1071	-0.448556	0.0874426	-5.12972	2.90179e-07	6.06909e-06
C77080	1147.01	-0.564873	0.110219	-5.125	2.97535e-07	6.21469e-06
Ndrg3	25760.9	-0.368912	0.0720411	-5.12085	3.04159e-07	6.33624e-06
Kctd16	481.054	-0.841186	0.16445	-5.11515	3.13486e-07	6.51332e-06
Ptk2	4073.42	-0.399345	0.0780838	-5.11432	3.14877e-07	6.53059e-06
Ttc9b	2405.72	-0.626076	0.12242	-5.11416	3.15147e-07	6.53059e-06
Cipc	4847.86	-0.267696	0.0523832	-5.11035	3.21564e-07	6.6548e-06
Ssbp4	2563.98	-0.406557	0.0799703	-5.08385	3.69855e-07	7.59432e-06
Dock4	5838.68	-0.510977	0.100554	-5.08162	3.74233e-07	7.6742e-06
Fermt2	3568.85	-0.326443	0.0642847	-5.07808	3.81262e-07	7.78794e-06
Abcb9	1728.08	-0.410194	0.0807717	-5.07844	3.80549e-07	7.78794e-06
Sun1	3415.89	-0.449261	0.0884695	-5.07814	3.81146e-07	7.78794e-06
Ctnna2	4381.56	-0.323782	0.0637706	-5.07729	3.82862e-07	7.81049e-06
Arr3	16.6199	-2.77698	0.547346	-5.07353	3.90498e-07	7.95595e-06
Grin1	15356.2	-0.350659	0.069135	-5.07209	3.9348e-07	8.00634e-06
Ttpal	2384.75	-0.326852	0.0644547	-5.07104	3.95647e-07	8.02969e-06
Adra2c	566.905	-0.731658	0.144631	-5.05877	4.21962e-07	8.53078e-06
Glt8d2	342.981	-1.02337	0.203051	-5.03997	4.6561e-07	9.36513e-06
Arhgap5	12329.4	-0.336948	0.066879	-5.03817	4.69999e-07	9.44135e-06
Csnk1g2	4804.4	-0.3608	0.0716714	-5.03409	4.80122e-07	9.62015e-06
Nol4	4022.11	-0.421843	0.0838391	-5.03158	4.86453e-07	9.72226e-06
Pcnxl2	3939.59	-0.413769	0.0822322	-5.03172	4.86105e-07	9.72226e-06
Mat2b	4395.87	-0.577041	0.114699	-5.03092	4.88141e-07	9.74364e-06
Sgtb	4691.15	-0.334233	0.066448	-5.02999	4.90514e-07	9.77861e-06
Plekho2	1164.81	-0.493874	0.0982503	-5.02669	4.99013e-07	9.93547e-06
Rcan2	9757.53	-0.567337	0.112942	-5.02328	5.07965e-07	1.00882e-05
Srcin1	13422.7	-0.489577	0.0974694	-5.02288	5.09035e-07	1.00967e-05
Ttc39b	5391.09	-0.520465	0.103633	-5.02222	5.10788e-07	1.01187e-05
Kcnq3	1574.98	-0.632849	0.126041	-5.02099	5.14051e-07	1.01706e-05
Myo1e	638.839	-0.418295	0.0833202	-5.02033	5.15821e-07	1.01928e-05
D10Bwg1379e	5209.7	-0.547062	0.109009	-5.01851	5.20742e-07	1.02772e-05
Scrt2	694.204	-0.597582	0.119106	-5.01724	5.24181e-07	1.03321e-05
H2-T23	366.246	-0.683402	0.136241	-5.01612	5.27263e-07	1.03798e-05
Hecw1	4239.19	-0.487912	0.0973614	-5.01135	5.40498e-07	1.06271e-05
Cpeb2	4190.45	-0.365447	0.0730466	-5.00294	5.6464e-07	1.10741e-05
Stxbp1	44606.6	-0.275598	0.0551189	-5.00008	5.73078e-07	1.12256e-05
Fzd3	6147.72	-0.4394	0.0879213	-4.99765	5.80328e-07	1.13394e-05
Fcho1	2235.94	-0.591945	0.11865	-4.98901	6.06906e-07	1.18002e-05
Kcnj9	5142.24	-0.606604	0.121683	-4.98513	6.19194e-07	1.20005e-05
Enc1	15999.6	-0.87603	0.175875	-4.98099	6.32595e-07	1.22092e-05
Cmya5	874.199	-0.655995	0.13171	-4.98062	6.33809e-07	1.22177e-05
Fgfrl1	654.027	-0.526939	0.105817	-4.9797	6.36828e-07	1.22609e-05
Hdac4	1336.93	-0.696614	0.140113	-4.9718	6.63343e-07	1.27247e-05
Fbxo41	4951.97	-0.367708	0.0739794	-4.97041	6.68124e-07	1.28008e-05
Rasal2	4606.53	-0.401915	0.0808971	-4.96823	6.75667e-07	1.29139e-05
Ttc7	295.861	-0.663743	0.133643	-4.96655	6.81535e-07	1.30103e-05
Fgf11	1458	-0.600919	0.121046	-4.96438	6.89226e-07	1.31412e-05
Cacng2	4249.96	-0.397246	0.080063	-4.96167	6.98894e-07	1.33094e-05
Slc4a11	22.69	-2.27078	0.458845	-4.9489	7.46345e-07	1.41788e-05
Htr2a	496.37	-1.2237	0.247342	-4.94738	7.52179e-07	1.42724e-05
Gabrg2	10730.4	-0.291226	0.0588721	-4.94675	7.54624e-07	1.43015e-05
Fgfr3	3816.37	-0.495247	0.10019	-4.94309	7.68938e-07	1.45553e-05
Il12a	47.9057	-1.52124	0.307929	-4.94024	7.80267e-07	1.4752e-05
Fam168a	15631.5	-0.291246	0.0590138	-4.93522	8.00587e-07	1.51163e-05
Pou2f2	234.06	-0.80034	0.162224	-4.93355	8.07502e-07	1.5194e-05
Cacnb4	21615.1	-0.504399	0.102264	-4.93235	8.12465e-07	1.52691e-05
Igdcc4	2826.39	-0.273884	0.0555548	-4.92998	8.22359e-07	1.54366e-05
Ramp1	1625.69	-0.564256	0.114477	-4.92897	8.26632e-07	1.54984e-05
Pex5l	5673.06	-0.691019	0.140308	-4.92499	8.43625e-07	1.57794e-05
Garnl3	4954.99	-0.526229	0.1069	-4.92261	8.53959e-07	1.59537e-05
Cep104	1314.29	-0.364779	0.0741152	-4.92179	8.57557e-07	1.6002e-05
Lrrc20	1024.97	-0.391688	0.0797322	-4.91254	8.9904e-07	1.67562e-05
Nav3	2650.95	-0.448744	0.091421	-4.90854	9.17557e-07	1.70609e-05
Atp1b2	34723.3	-0.332114	0.0676599	-4.90858	9.17373e-07	1.70609e-05
Htra1	4710.02	-0.504226	0.102797	-4.90505	9.3402e-07	1.73466e-05
Slco2a1	212.711	-1.08799	0.222144	-4.89768	9.69737e-07	1.79887e-05
4933432I09Rik	18.476	-2.53	0.517818	-4.88589	1.02961e-06	1.90545e-05
Esrrg	3548.49	-0.338413	0.069267	-4.88564	1.03095e-06	1.90569e-05
Grik5	5692.55	-0.382758	0.0783626	-4.88445	1.03718e-06	1.91495e-05
Ank1	12245.6	-0.487968	0.100152	-4.87225	1.10333e-06	2.0347e-05
Ube2g1	3003.26	-0.320617	0.0658503	-4.86888	1.12232e-06	2.06248e-05
Unc5d	2341.17	-0.566907	0.11643	-4.86908	1.12117e-06	2.06248e-05
Sebox	149.315	-1.33495	0.27474	-4.85896	1.18006e-06	2.16103e-05
Hbegf	706.432	-0.468635	0.0964434	-4.85917	1.17877e-06	2.16103e-05
Mapk9	12685.4	-0.284193	0.0585034	-4.85771	1.18748e-06	2.17209e-05
Sorcs3	1540.9	-0.742288	0.152937	-4.85355	1.21268e-06	2.21304e-05
Dcbld2	1944.68	-0.391997	0.0809362	-4.84329	1.2771e-06	2.3252e-05
Lrrc4c	4759.93	-0.458432	0.0947729	-4.83716	1.31708e-06	2.39364e-05
Apba2	8668.39	-0.378446	0.0782388	-4.83706	1.31772e-06	2.39364e-05
Btbd11	1759.64	-0.335802	0.0694674	-4.83395	1.33848e-06	2.42295e-05
Tspan33	783.006	-0.469255	0.0971255	-4.83143	1.35558e-06	2.45021e-05
Negr1	12680.5	-0.350959	0.0727021	-4.82736	1.38355e-06	2.49308e-05
Slc35c1	625.605	-0.443214	0.0919346	-4.82097	1.42864e-06	2.56553e-05
Mib1	4136.22	-0.43339	0.0899348	-4.81894	1.44323e-06	2.58878e-05
Ptprb	2587.39	-0.415653	0.0865816	-4.80071	1.58103e-06	2.8167e-05
Ptprz1	13128.1	-0.429489	0.0894905	-4.79927	1.59245e-06	2.83384e-05
Fhod3	2165.26	-0.558911	0.116476	-4.79851	1.59847e-06	2.84135e-05
Kcnj12	2679.2	-0.729302	0.152002	-4.79799	1.60264e-06	2.84554e-05
Id2	6115	-0.42911	0.0894959	-4.79474	1.62884e-06	2.88881e-05
Ppfia3	5982	-0.382786	0.0798562	-4.79344	1.63945e-06	2.90435e-05
Luzp2	15242.3	-0.51478	0.107507	-4.78836	1.6815e-06	2.97551e-05
Fam131a	6538.81	-0.555556	0.116042	-4.78756	1.68819e-06	2.98399e-05
Aldoc	40764.1	-0.38053	0.0795272	-4.7849	1.71071e-06	3.02039e-05
Pde5a	2947.79	-0.505756	0.105728	-4.78355	1.72224e-06	3.03736e-05
Lgi4	2167.54	-0.485023	0.101435	-4.78163	1.73876e-06	3.06306e-05
Fam129b	1031.5	-0.436543	0.091311	-4.78084	1.74565e-06	3.07176e-05
Gm20752	10.1932	-3.25389	0.680663	-4.78047	1.74882e-06	3.0739e-05
Cyp46a1	4576.03	-0.383162	0.0801976	-4.77773	1.77288e-06	3.11272e-05
Fam78b	1986.69	-0.440601	0.092301	-4.77353	1.81025e-06	3.17479e-05
Zfp365	18252.9	-0.494557	0.103661	-4.7709	1.83403e-06	3.21162e-05
Sytl1	20.3596	-2.56362	0.53736	-4.77076	1.83533e-06	3.21162e-05
Fgf14	3295.28	-0.445277	0.0933919	-4.76783	1.86216e-06	3.25135e-05
Adcy2	4500.28	-0.464864	0.0976632	-4.75987	1.93722e-06	3.37492e-05
Cadps2	10253.8	-0.617163	0.129698	-4.75847	1.95064e-06	3.39455e-05
Scai	4063.31	-0.34016	0.0714988	-4.75756	1.9595e-06	3.4062e-05
Syngap1	5692.77	-0.599407	0.12601	-4.75681	1.96674e-06	3.41502e-05
Vsnl1	26899.6	-0.444637	0.0935208	-4.75442	1.99013e-06	3.44802e-05
Camk2g	9403.58	-0.481813	0.101339	-4.75445	1.98984e-06	3.44802e-05
Mical2	10466.4	-0.715743	0.150646	-4.75116	2.02257e-06	3.50039e-05
Metrnl	170.849	-0.942098	0.198352	-4.74964	2.03783e-06	3.52291e-05
Zfp91	6038.21	-0.299181	0.0631788	-4.73547	2.18548e-06	3.77402e-05
Sh2d5	1775.25	-0.321224	0.0678442	-4.73474	2.19339e-06	3.78093e-05
Exog	892.966	-0.331778	0.0700743	-4.73466	2.19428e-06	3.78093e-05
Slc9a5	1567.97	-0.536699	0.113374	-4.73388	2.20272e-06	3.79132e-05
Tbc1d24	3926.14	-0.28486	0.0601846	-4.7331	2.21115e-06	3.80169e-05
Ckb	47375.5	-0.378615	0.0799996	-4.73271	2.21542e-06	3.80487e-05
Camk1g	898.923	-0.599903	0.1268	-4.73108	2.23325e-06	3.82787e-05
Prkca	7739.39	-0.543643	0.114912	-4.73094	2.23488e-06	3.82787e-05
Plekha4	53.9049	-1.10165	0.232867	-4.73082	2.2361e-06	3.82787e-05
Kcnj10	11037.4	-0.565556	0.119587	-4.72926	2.25339e-06	3.84492e-05
Baiap2	6979.71	-0.522503	0.110482	-4.72929	2.25301e-06	3.84492e-05
Robo3	485.088	-1.01752	0.21515	-4.72934	2.25256e-06	3.84492e-05
Ankrd11	8595.77	-0.301583	0.0637916	-4.72763	2.27154e-06	3.8717e-05
Tpm1	6905.02	-0.270155	0.0571522	-4.72695	2.27921e-06	3.88058e-05
Lsm11	2153.67	-0.605658	0.128162	-4.72572	2.29297e-06	3.89978e-05
Rab15	7948.3	-0.415661	0.088	-4.72342	2.31914e-06	3.94003e-05
Mroh5	39.2453	-1.34933	0.286133	-4.71575	2.40824e-06	4.07383e-05
Cntnap5a	738.484	-0.88269	0.18726	-4.71372	2.43232e-06	4.11015e-05
Atad2	591.703	-0.557557	0.118315	-4.71247	2.44735e-06	4.12228e-05
Osbpl3	1304.96	-0.519802	0.1103	-4.71263	2.44544e-06	4.12228e-05
Cnr1	15114.3	-0.507503	0.107728	-4.71097	2.46546e-06	4.14835e-05
1700016K19Rik	41.3332	-1.68836	0.358419	-4.71056	2.47035e-06	4.15214e-05
Pld3	13693.8	-0.496571	0.105474	-4.70798	2.50185e-06	4.19612e-05
Ttll3	694.465	-0.838443	0.178205	-4.70493	2.53948e-06	4.25471e-05
Cx3cl1	15965.7	-0.655264	0.139292	-4.70424	2.54819e-06	4.26476e-05
Wnk2	5988.08	-0.450004	0.0956773	-4.70335	2.55923e-06	4.2787e-05
Etv6	838.354	-0.521022	0.111005	-4.69367	2.68344e-06	4.47685e-05
Foxo3	2640.25	-0.569588	0.121375	-4.69281	2.6948e-06	4.48631e-05
Swap70	474.633	-0.444551	0.0947281	-4.69292	2.69337e-06	4.48631e-05
Homer2	2761.54	-0.436827	0.0931694	-4.68852	2.75189e-06	4.57168e-05
Coro2a	1447.62	-0.47085	0.10044	-4.68788	2.76047e-06	4.58109e-05
Mapk12	580.623	-0.82299	0.17558	-4.68725	2.76896e-06	4.59035e-05
Tmem97	410.7	-0.602072	0.12846	-4.68683	2.77466e-06	4.59496e-05
Neurl1b	1546.47	-0.733258	0.156464	-4.68642	2.78029e-06	4.59946e-05
Pgr	1343.86	-0.45338	0.096749	-4.68614	2.78403e-06	4.6008e-05
Nr1d1	4230.19	-0.668332	0.142709	-4.68319	2.82447e-06	4.65786e-05
Wfdc18	18.5819	-2.23322	0.476911	-4.68268	2.83144e-06	4.66448e-05
Hpca	9782.75	-0.574096	0.122646	-4.68093	2.85576e-06	4.69962e-05
Pin1	2003.66	-0.465252	0.0994275	-4.67931	2.87845e-06	4.73202e-05
Nwd1	4025.37	-0.665227	0.14221	-4.67779	2.8999e-06	4.75734e-05
Fads1	8632.15	-0.347756	0.0743585	-4.67675	2.91462e-06	4.77651e-05
Rasl10b	7873.91	-0.548958	0.117434	-4.67462	2.94502e-06	4.82132e-05
Acss2	1967.71	-0.264357	0.0565807	-4.67221	2.9797e-06	4.86797e-05
Lphn1	21363.1	-0.506063	0.108371	-4.66974	3.01576e-06	4.92178e-05
Ier5	2246.35	-0.759106	0.162653	-4.66701	3.05609e-06	4.98243e-05
Ttc19	2919.55	-0.331389	0.0710701	-4.66285	3.11859e-06	5.07907e-05
Cit	3425.85	-0.420855	0.0903321	-4.65897	3.17791e-06	5.17035e-05
Ptchd4	727.467	-0.524306	0.112589	-4.6568	3.21157e-06	5.21971e-05
Apc	17363.5	-0.435465	0.0936729	-4.64879	3.33895e-06	5.42115e-05
Fam160a2	3463.4	-0.354089	0.0763187	-4.63961	3.49072e-06	5.65009e-05
R3hdm2	9574.9	-0.416354	0.0898884	-4.6319	3.62333e-06	5.84518e-05
Tcof1	1151.69	-0.447643	0.0966513	-4.63153	3.62981e-06	5.84518e-05
Dab1	4487.19	-0.327758	0.0707653	-4.63163	3.62805e-06	5.84518e-05
Mtus2	3479.28	-0.396807	0.0856711	-4.63175	3.62586e-06	5.84518e-05
Cbx6	16625.9	-0.444742	0.0961239	-4.62676	3.7143e-06	5.96904e-05
Flrt2	2542.28	-0.52168	0.112925	-4.6197	3.84295e-06	6.16947e-05
Hira	2412.73	-0.268203	0.0580854	-4.61739	3.88603e-06	6.23229e-05
Iqsec3	6794.65	-0.628188	0.136072	-4.61657	3.90134e-06	6.25047e-05
Adrb1	838.124	-0.677952	0.146995	-4.61206	3.98695e-06	6.3682e-05
Dio3	17.4447	-2.00847	0.435523	-4.61162	3.99545e-06	6.37531e-05
Ptpn4	5544.58	-0.428793	0.0931491	-4.6033	4.15856e-06	6.62886e-05
Sstr2	339.434	-1.06483	0.231542	-4.59889	4.24751e-06	6.75697e-05
Cck	5678.26	-0.553253	0.120337	-4.59752	4.2755e-06	6.79463e-05
Hs6st1	2832.84	-0.303758	0.0660787	-4.59691	4.28799e-06	6.80762e-05
Fam81a	5224.64	-0.503872	0.109647	-4.59542	4.31874e-06	6.84953e-05
Mgat4b	2104.49	-0.339368	0.0739137	-4.59141	4.40253e-06	6.97539e-05
Fgfr1op2	4043.21	-0.392801	0.0856067	-4.58844	4.46581e-06	7.06855e-05
Krt80	42.6707	-1.79291	0.390998	-4.58546	4.52979e-06	7.1594e-05
Zdhhc21	3723.27	-0.274045	0.0597863	-4.58374	4.56733e-06	7.2075e-05
Upf2	2768.04	-0.308618	0.0673417	-4.58286	4.58651e-06	7.21956e-05
Tacc1	8777.53	-0.427229	0.0932213	-4.58296	4.5844e-06	7.21956e-05
Esrrb	300.465	-0.845699	0.185155	-4.56752	4.93525e-06	7.74156e-05
Plec	6630.06	-0.589093	0.129066	-4.56426	5.01255e-06	7.84718e-05
Osbpl1a	13338.1	-0.507806	0.111262	-4.56405	5.0177e-06	7.84744e-05
Egr2	151.011	-1.81685	0.398421	-4.56011	5.11262e-06	7.98796e-05
Ndrg2	28750.1	-0.316703	0.0694621	-4.55936	5.13087e-06	8.00853e-05
Tle1	1442.28	-0.357093	0.0784101	-4.55417	5.2592e-06	8.17642e-05
Serpini1	11005.7	-0.360508	0.0792035	-4.55166	5.32242e-06	8.25028e-05
Smpd3	2026.84	-0.41366	0.0909074	-4.55034	5.35582e-06	8.28573e-05
Cxcl12	2934.38	-0.5272	0.115998	-4.54491	5.49578e-06	8.47913e-05
Tub	7045.75	-0.267812	0.0589598	-4.54228	5.56497e-06	8.57561e-05
Stard3	829.401	-0.35147	0.0774023	-4.54082	5.60368e-06	8.62682e-05
Pde8b	2578.08	-0.501981	0.110621	-4.53783	5.68365e-06	8.74138e-05
Pclo	16293.1	-0.464066	0.102312	-4.53582	5.73808e-06	8.81648e-05
Mkl2	6906.46	-0.530436	0.117011	-4.53323	5.80884e-06	8.90783e-05
Zfp148	6074.52	-0.283205	0.0624865	-4.53226	5.83571e-06	8.94033e-05
Nrxn3	12679.1	-0.561868	0.124007	-4.53094	5.87211e-06	8.97863e-05
Cabp7	608.858	-1.14028	0.251717	-4.53	5.89828e-06	9.00989e-05
Dip2b	5055.64	-0.525775	0.116124	-4.52769	5.96332e-06	9.09161e-05
Acta1	189.391	-0.760177	0.167973	-4.52558	6.02307e-06	9.16497e-05
Reln	8377.09	-0.767792	0.169697	-4.52449	6.05412e-06	9.20258e-05
Igsf9b	1054.8	-1.51167	0.334197	-4.52327	6.0891e-06	9.23866e-05
Pak6	1729.13	-0.696868	0.154165	-4.52027	6.17597e-06	9.36144e-05
Hcn1	5856.93	-0.40214	0.0890983	-4.51344	6.37845e-06	9.65907e-05
Frzb	670.48	-0.523178	0.116014	-4.5096	6.49488e-06	9.82593e-05
Napa	7914.04	-0.375658	0.0833459	-4.50722	6.56839e-06	9.9276e-05
Bai1	11581	-0.428278	0.0950516	-4.50574	6.61421e-06	9.98727e-05
Lancl1	5740.76	-0.281927	0.0625863	-4.50462	6.64925e-06	0.000100276
Atp2a1	15.1503	-3.38796	0.752131	-4.50448	6.65364e-06	0.000100276
Shroom3	229.417	-0.707639	0.157305	-4.49851	6.84329e-06	0.000102839
Tecpr2	3204.07	-0.372393	0.082797	-4.49766	6.8705e-06	0.000103149
Neu1	1824.15	-0.293923	0.0653539	-4.4974	6.87885e-06	0.000103176
Inpp4a	9490.09	-0.465733	0.103693	-4.49147	7.07332e-06	0.000105791
Strn4	6685.34	-0.309363	0.0688826	-4.49117	7.08339e-06	0.000105841
8030462N17Rik	1710.03	-0.428862	0.0955211	-4.48971	7.13188e-06	0.000106464
Pygm	1943.89	-0.430089	0.0958306	-4.48802	7.18888e-06	0.000107214
Agap2	24651.3	-0.486657	0.108441	-4.48775	7.19782e-06	0.000107245
Nog	351.772	-0.525945	0.117285	-4.48435	7.31381e-06	0.000108768
Ppard	1088.33	-0.341541	0.0762097	-4.4816	7.40861e-06	0.00010997
Lamb3	80.0239	-1.34955	0.301161	-4.48115	7.42409e-06	0.000110086
Kcnk12	913.588	-0.668687	0.149228	-4.48097	7.4304e-06	0.000110086
Stard4	1319.39	-0.387511	0.0865557	-4.47701	7.56941e-06	0.000111966
Arrb1	14191	-0.429891	0.0960231	-4.47696	7.5715e-06	0.000111966
Cdc40	1806.24	-0.35958	0.0804454	-4.46986	7.82711e-06	0.000115637
Clec16a	3993.04	-0.36556	0.0818075	-4.46854	7.87561e-06	0.000116245
Src	3843.59	-0.446499	0.099967	-4.46647	7.95222e-06	0.000117218
Phactr3	4954.58	-0.285897	0.0640112	-4.46635	7.95644e-06	0.000117218
Qrfpr	56.6271	-1.37712	0.308383	-4.46561	7.98396e-06	0.000117513
Pkp1	10.3415	-2.97012	0.665311	-4.46426	8.03477e-06	0.000118151
Phf21b	657.133	-0.747365	0.167456	-4.46304	8.08044e-06	0.000118712
Pparg	130.153	-0.811426	0.18184	-4.46231	8.10799e-06	0.000119005
Asap2	2362.03	-0.45198	0.101301	-4.46177	8.12873e-06	0.000119199
Stxbp5l	9754.26	-0.489746	0.109815	-4.45972	8.20649e-06	0.000120227
Cdk5r1	10902.5	-0.43212	0.0969169	-4.45866	8.24732e-06	0.000120713
Tbr1	3536.71	-0.396974	0.0891735	-4.45171	8.51909e-06	0.000124459
Cited4	236.56	-0.95289	0.214041	-4.4519	8.51144e-06	0.000124459
Rnf165	2055.01	-0.45231	0.101649	-4.44975	8.59711e-06	0.000125367
Hipk3	6908.52	-0.424993	0.0955877	-4.44611	8.74405e-06	0.000127391
Tuba8	984.699	-0.680697	0.1532	-4.44319	8.8633e-06	0.000129009
Olfm3	6785.14	-0.536377	0.120754	-4.44189	8.9174e-06	0.000129677
Gm10033	396.485	-0.679122	0.152924	-4.4409	8.95852e-06	0.000130155
Rbpj	1297.64	-0.293072	0.0660623	-4.43631	9.15158e-06	0.000132602
Nrn1l	20.9481	-1.84504	0.415896	-4.43629	9.1522e-06	0.000132602
Fam57b	3409.85	-0.375757	0.0848145	-4.43034	9.4083e-06	0.000136169
Itgal	42.2023	-1.31374	0.296543	-4.43017	9.41572e-06	0.000136169
Kcnj11	1860.18	-0.384295	0.0868134	-4.42668	9.56952e-06	0.000138266
Psd3	28047.1	-0.397846	0.0900458	-4.41827	9.94942e-06	0.00014323
Eps8l2	778.288	-0.633906	0.143612	-4.41403	1.01463e-05	0.000145931
Amica1	103.145	-2.00095	0.453485	-4.41238	1.02239e-05	0.000146913
Map3k9	3784.53	-0.431286	0.0978629	-4.40705	1.04788e-05	0.000150302
Rasgef1c	826.591	-0.608246	0.138207	-4.40097	1.0777e-05	0.000154297
Pitpnc1	3033.97	-0.498117	0.113202	-4.40026	1.08122e-05	0.000154661
Usp2	2778.4	-0.685819	0.156038	-4.39522	1.10661e-05	0.000158149
Trib1	874.608	-0.886526	0.201715	-4.39495	1.108e-05	0.000158204
Trak1	7450.9	-0.314317	0.0715236	-4.39459	1.10982e-05	0.00015832
Large	5240.92	-0.422125	0.0961076	-4.39221	1.12206e-05	0.000159777
Xylt1	743.117	-0.562921	0.128272	-4.38847	1.14149e-05	0.000162396
Pkig	1464.29	-0.360369	0.0821333	-4.38762	1.146e-05	0.000162892
Ranbp2	7739.38	-0.368986	0.0841437	-4.38519	1.15883e-05	0.000164567
Sdf2l1	235.929	-0.741693	0.169186	-4.3839	1.16571e-05	0.000165395
Cpeb4	10840.5	-0.352487	0.0804674	-4.3805	1.18409e-05	0.0001677
Prkce	18028.9	-0.441667	0.100928	-4.37604	1.20853e-05	0.000170701
Fam53b	1921.64	-0.812313	0.185768	-4.37272	1.22709e-05	0.000173166
Nrep	15760.4	-0.480664	0.109956	-4.37143	1.23438e-05	0.000174039
Crtc1	6890.92	-0.40351	0.0923749	-4.36818	1.25289e-05	0.000176491
Psrc1	143.156	-0.923605	0.211462	-4.36771	1.25559e-05	0.000176714
Rgs6	1369.87	-0.390766	0.089757	-4.3536	1.33922e-05	0.000188147
Arhgap20	4449.16	-0.279133	0.0641225	-4.35311	1.34219e-05	0.000188397
Nfe2l1	12812.2	-0.281815	0.0647434	-4.3528	1.34411e-05	0.000188499
Reep2	5120.43	-0.300379	0.0690224	-4.35191	1.34957e-05	0.000188927
Fat3	2817.44	-0.658053	0.151207	-4.352	1.34902e-05	0.000188927
Vipr1	607.173	-0.568277	0.130605	-4.35112	1.35447e-05	0.000189445
Gm11549	1046.69	-0.734413	0.168815	-4.3504	1.35888e-05	0.000189893
Rap1gds1	14766.1	-0.317457	0.0729963	-4.34895	1.3679e-05	0.000190816
Stim2	2689.44	-0.413603	0.095101	-4.3491	1.367e-05	0.000190816
2210408F21Rik	231.9	-0.695027	0.159898	-4.34669	1.38205e-05	0.000192618
Tom1l2	12512.7	-0.268107	0.0617381	-4.34265	1.40776e-05	0.000196029
Chrm3	1121.33	-0.9555	0.220092	-4.34137	1.41598e-05	0.000196825
Dhrs3	625.33	-0.55086	0.127052	-4.3357	1.45294e-05	0.000201429
Ankrd13b	2288.56	-0.411652	0.0949765	-4.33425	1.46255e-05	0.000202227
Prss22	19.1487	-2.15386	0.496921	-4.33442	1.46147e-05	0.000202227
Sorcs1	1505.3	-0.534189	0.123357	-4.33045	1.48808e-05	0.000205577
Hrh2	156.461	-0.760842	0.175876	-4.326	1.51838e-05	0.000209396
Synm	1477.39	-0.460318	0.106418	-4.32557	1.52139e-05	0.000209627
Ttbk1	4656.72	-0.522353	0.120866	-4.32175	1.54796e-05	0.000213101
Zfp651	2979.33	-0.378687	0.0876775	-4.31909	1.56675e-05	0.000215499
Cemip	1300.44	-0.488944	0.113214	-4.31878	1.56895e-05	0.000215614
Plxna4	4939.48	-0.420821	0.0975088	-4.31572	1.59085e-05	0.000218433
Rasl11b	1635.28	-0.582254	0.13497	-4.31394	1.60368e-05	0.000220003
Rnf152	3842.48	-0.596984	0.138514	-4.30992	1.63314e-05	0.000223655
Necab3	1881.8	-0.435852	0.101133	-4.3097	1.63475e-05	0.000223681
Igfbp6	830.159	-0.548796	0.127355	-4.30918	1.63859e-05	0.000224012
Ttyh3	7380.66	-0.406475	0.0944211	-4.30492	1.67047e-05	0.000228172
Csrnp1	374.298	-0.634822	0.147483	-4.30438	1.67451e-05	0.000228526
Fbxo33	2826.72	-0.35344	0.0821249	-4.30369	1.6798e-05	0.000229049
Fam160b2	1880.98	-0.307001	0.0713432	-4.30316	1.6838e-05	0.000229396
Ntrk2	24814.7	-0.337854	0.0785496	-4.30116	1.6991e-05	0.00023128
Sh3bp1	307.427	-0.605336	0.140863	-4.29734	1.72862e-05	0.000235095
Tmod1	2614.42	-0.331523	0.077168	-4.29612	1.7381e-05	0.000236181
Slc17a7	34565	-0.495916	0.115759	-4.28404	1.83529e-05	0.000248957
Hcfc2	1005.9	-0.439643	0.102651	-4.28289	1.84478e-05	0.000250029
Nr2f6	1017.91	-0.388089	0.0906684	-4.28032	1.86627e-05	0.000252508
Cdh12	1139.84	-0.520204	0.121623	-4.27719	1.89271e-05	0.000255645
Camk1d	6547.67	-0.301759	0.0705801	-4.27541	1.90782e-05	0.000257465
Unc13d	105.224	-1.15501	0.270238	-4.27405	1.9195e-05	0.000258599
Dmp1	428.697	-0.558354	0.130634	-4.2742	1.91824e-05	0.000258599
Gpr26	1330.07	-0.778136	0.18221	-4.27054	1.94997e-05	0.000262255
Adssl1	630.754	-0.545484	0.127809	-4.26797	1.97258e-05	0.000264844
Mfsd12	718.523	-0.46234	0.108347	-4.26723	1.97913e-05	0.000265496
Cplx1	24316.5	-0.372328	0.0873742	-4.2613	2.03241e-05	0.000271949
Celsr2	8961.09	-0.498738	0.11713	-4.25801	2.06258e-05	0.000275518
Diap1	2032.79	-0.257532	0.0605029	-4.25652	2.0763e-05	0.000277116
Zbtb34	982.068	-0.417001	0.097985	-4.25576	2.08337e-05	0.000277715
Slc35f3	1462.27	-0.336653	0.0791074	-4.25565	2.08444e-05	0.000277715
Wbscr17	2334.86	-0.312302	0.0734047	-4.25451	2.09503e-05	0.000278671
2022-09-11	4709.95	-0.433066	0.101885	-4.25052	2.13275e-05	0.000283019
Madd	9170.96	-0.365388	0.0860604	-4.24572	2.17895e-05	0.000288858
Npc1l1	55.0268	-0.997641	0.235038	-4.24459	2.18992e-05	0.000290067
AI115009	46.0479	-1.36053	0.320556	-4.24427	2.19302e-05	0.000290235
Slc6a17	19618.7	-0.336329	0.0792796	-4.24231	2.21229e-05	0.000292538
Tspan14	1361.48	-0.324042	0.0764644	-4.23782	2.257e-05	0.000298201
Mef2d	4395.14	-0.447518	0.105607	-4.23759	2.25931e-05	0.000298255
Frrs1l	14907.1	-0.368771	0.0871536	-4.23128	2.32369e-05	0.000305602
Cyp4f14	359.303	-0.45594	0.10777	-4.2307	2.32968e-05	0.000306006
Slc36a1	3194.35	-0.459713	0.108703	-4.22908	2.3465e-05	0.000307447
Gm13629	357.688	-0.530255	0.125429	-4.22752	2.3628e-05	0.000309325
Tspyl5	2031.79	-0.377501	0.0893011	-4.22728	2.36534e-05	0.000309399
Ermap	33.0322	-1.37652	0.325841	-4.22452	2.39448e-05	0.000312433
Mark2	4005.84	-0.424849	0.100626	-4.22204	2.42099e-05	0.00031563
Nxf7	37.4256	-1.74013	0.412265	-4.22089	2.43338e-05	0.000316525
St3gal2	5964.32	-0.352488	0.0835436	-4.21921	2.45158e-05	0.000318301
Nt5dc3	5441.28	-0.359598	0.0853346	-4.21398	2.50913e-05	0.000325237
Lrp4	1158.72	-0.651568	0.154737	-4.2108	2.54467e-05	0.000329302
Ncald	18518.6	-0.314093	0.0746344	-4.20842	2.57161e-05	0.000332515
Zbtb17	983.916	-0.325569	0.0773846	-4.20716	2.58606e-05	0.000334108
Tnfrsf19	2262.58	-0.287281	0.0682971	-4.20634	2.59536e-05	0.000334991
Map9	4713.97	-0.279093	0.0663528	-4.20619	2.59714e-05	0.000334991
Ppp1r1b	4367.03	-1.21936	0.290239	-4.20121	2.65494e-05	0.000341886
Car15	340.888	-0.663885	0.158052	-4.20041	2.66431e-05	0.00034267
Ahnak	1499.72	-0.579222	0.1379	-4.20032	2.66538e-05	0.00034267
Map3k14	293.384	-0.568589	0.135404	-4.19921	2.67845e-05	0.00034407
Gipc1	1516.72	-0.275994	0.065835	-4.19221	2.76252e-05	0.000354002
Rfwd2	2157.53	-0.310309	0.0740657	-4.18964	2.79394e-05	0.000357157
6430548M08Rik	13255.8	-0.431888	0.10327	-4.18212	2.88804e-05	0.000368588
Bace2	122.015	-0.961545	0.229959	-4.18137	2.89761e-05	0.00036951
Zbtb7a	6518.58	-0.436299	0.104487	-4.17564	2.97144e-05	0.000378006
Syt13	9042.32	-0.411418	0.0985251	-4.17576	2.9699e-05	0.000378006
Cep85l	631.639	-0.429554	0.102923	-4.17354	2.99908e-05	0.000380907
Il4ra	394.395	-0.721337	0.172844	-4.17335	3.0015e-05	0.000380907
Zdhhc2	2308.33	-0.384745	0.0922516	-4.17061	3.03786e-05	0.000384998
Kbtbd11	7184.76	-0.357599	0.0858629	-4.16476	3.11678e-05	0.000394185
Mtcl1	7843.57	-0.588547	0.141327	-4.16443	3.12138e-05	0.000394214
Acvr1c	1444.69	-0.746823	0.179555	-4.15931	3.19214e-05	0.000402506
Gramd1b	4873.62	-0.357204	0.0859018	-4.15828	3.20652e-05	0.000403996
Hepacam	4391.69	-0.356743	0.0857992	-4.15788	3.21218e-05	0.000404063
Tspan9	6715.29	-0.537122	0.129206	-4.15712	3.22291e-05	0.000405089
Ldhb	14737.1	-0.317132	0.0763347	-4.1545	3.26006e-05	0.000408956
Fam189a1	2103.64	-0.503154	0.121124	-4.15403	3.26674e-05	0.000409291
Ppm1f	2576	-0.304475	0.0732995	-4.15384	3.26938e-05	0.000409296
Rps6ka2	2179.64	-0.389023	0.0936721	-4.15303	3.28106e-05	0.000410432
Rb1cc1	5807.14	-0.278108	0.066981	-4.15205	3.29514e-05	0.000411867
Zfyve28	2389.23	-0.466531	0.112384	-4.15121	3.30724e-05	0.000413051
Gm3230	109.792	-0.86069	0.207392	-4.15006	3.32388e-05	0.000414472
Lmbrd2	2502.04	-0.417573	0.100652	-4.14869	3.34381e-05	0.000416628
Tmem215	353.041	-1.02706	0.247589	-4.14826	3.35015e-05	0.000417087
Abhd2	2001.23	-0.525447	0.126685	-4.14766	3.35896e-05	0.000417853
Abhd8	7937.38	-0.263653	0.0635737	-4.1472	3.36563e-05	0.000418353
Epas1	7242.18	-0.359536	0.0867347	-4.14524	3.39457e-05	0.000421618
Ankrd63	480.789	-1.62777	0.392812	-4.14388	3.41481e-05	0.000423464
Kdm7a	4977.51	-0.577156	0.139277	-4.14394	3.41394e-05	0.000423464
2900055J20Rik	196.485	-0.734476	0.177305	-4.14244	3.43626e-05	0.000425789
Mapk14	3978.38	-0.321439	0.0776216	-4.14111	3.45631e-05	0.0004276
Tmem178b	1956.53	-0.534866	0.129394	-4.13364	3.5707e-05	0.000440778
Sgsm2	3011.25	-0.350553	0.0848267	-4.13258	3.5872e-05	0.000442403
Dhcr24	3696	-0.37983	0.0919506	-4.1308	3.61499e-05	0.000445132
Unc13a	12326.6	-0.487135	0.118006	-4.12806	3.65845e-05	0.000450132
Ppm1l	4329.39	-0.427118	0.103513	-4.12623	3.68766e-05	0.000453019
Tnk2	7867.23	-0.324166	0.0786428	-4.12201	3.75583e-05	0.000459957
Rnf169	2083.48	-0.370061	0.089809	-4.12054	3.77991e-05	0.000462547
Relt	754.154	-0.506369	0.122993	-4.11707	3.83724e-05	0.000468627
N4bp3	418.489	-0.483148	0.117362	-4.11673	3.84284e-05	0.000468791
Adrbk1	11160.9	-0.275042	0.0668556	-4.11397	3.88916e-05	0.000474075
Hmgcs1	10089.8	-0.362875	0.0882363	-4.11253	3.91342e-05	0.000476662
Tango2	1928.15	-0.372838	0.0906831	-4.11143	3.93209e-05	0.000478567
Entpd7	813.346	-0.5846	0.14221	-4.11082	3.94259e-05	0.000479474
Ptgs2	298.509	-0.850059	0.206824	-4.11006	3.95561e-05	0.000480187
Cecr6	1720.21	-0.64717	0.157579	-4.10695	4.00922e-05	0.000485329
Hecw2	3408.02	-0.534322	0.130248	-4.10235	4.08969e-05	0.00049393
Tmem198	1658.56	-0.469287	0.114431	-4.10105	4.1128e-05	0.000495961
Tmem38a	3433.83	-0.27989	0.0682734	-4.09955	4.13949e-05	0.000498798
Scly	582.534	-0.357776	0.0872795	-4.0992	4.14577e-05	0.000499172
Cebpa	307.723	-0.511444	0.124811	-4.09773	4.17223e-05	0.000501974
Ntng2	509.18	-0.663429	0.161952	-4.09645	4.19529e-05	0.000504363
Clcn2	1789.33	-0.315071	0.0769292	-4.0956	4.2108e-05	0.000505842
Arhgap42	602.891	-0.582057	0.142161	-4.09435	4.2336e-05	0.000508194
D630041G03Rik	220.923	-0.760365	0.185782	-4.09277	4.26241e-05	0.000511263
Kcnq5	2847.09	-0.757979	0.185665	-4.08251	4.45515e-05	0.000533568
Car11	2941.31	-0.338367	0.0829051	-4.08137	4.47709e-05	0.000535788
Esrra	2252.06	-0.304102	0.0745225	-4.08068	4.49048e-05	0.000536982
Fam19a1	1113.7	-0.960322	0.235387	-4.07975	4.50834e-05	0.000538709
Dusp3	7773.43	-0.380325	0.0933631	-4.07361	4.62897e-05	0.000551581
Zbtb7b	1046.69	-0.325593	0.0799284	-4.07356	4.63007e-05	0.000551581
Cacna1a	13366.5	-0.468131	0.114926	-4.07332	4.63479e-05	0.000551726
Epha8	1181.63	-0.78071	0.191693	-4.07271	4.64686e-05	0.000552744
Phyhip	20599.5	-0.435887	0.107098	-4.06999	4.70151e-05	0.000558823
Tbl1xr1	4572.24	-0.48155	0.118438	-4.06584	4.78601e-05	0.00056801
Egr3	3276.22	-1.07785	0.265713	-4.05645	4.98245e-05	0.000588661
Anks1b	13276.7	-0.278394	0.068664	-4.05444	5.02554e-05	0.000593307
Slc4a4	16276.1	-0.504577	0.124629	-4.04863	5.1519e-05	0.00060777
Adamtsl5	215.131	-0.591268	0.146114	-4.04662	5.19627e-05	0.000612545
Tsnax	6241.62	-0.345521	0.0854058	-4.04563	5.21815e-05	0.000614665
Cables2	1264.88	-0.396654	0.0980673	-4.04471	5.23875e-05	0.00061663
Scx	173.401	-1.37181	0.339189	-4.04438	5.24613e-05	0.000617037
Coro2b	9706.24	-0.418237	0.103418	-4.04415	5.25135e-05	0.000617191
Ell2	1202.52	-0.358536	0.0887305	-4.04073	5.32857e-05	0.000625333
Plcd3	585.034	-0.341965	0.0846709	-4.03876	5.37351e-05	0.000630137
Nrgn	32404.2	-0.687422	0.170273	-4.03718	5.40987e-05	0.000633458
Npnt	781.964	-0.605495	0.149995	-4.03678	5.41896e-05	0.00063405
Wnt2b	64.8092	-1.86213	0.461433	-4.03554	5.44762e-05	0.000636458
Pradc1	304.443	-0.738912	0.183159	-4.03426	5.47753e-05	0.000639478
Prex1	7323.62	-0.328786	0.0818002	-4.01937	5.83533e-05	0.000680242
Magi2	4968.7	-0.306605	0.0762877	-4.01906	5.84304e-05	0.000680636
Usp31	6855.56	-0.434458	0.108163	-4.0167	5.90181e-05	0.000686467
Lrp1	18869.4	-0.497031	0.123838	-4.01357	5.98071e-05	0.000693595
Fmnl1	3786.38	-0.589581	0.146959	-4.01189	6.02357e-05	0.000698052
Stk32c	2729.41	-0.694678	0.173326	-4.00794	6.12517e-05	0.000708783
Nefh	4386.95	-0.577499	0.144204	-4.00473	6.20885e-05	0.000716996
Trpm4	325.55	-0.39228	0.097955	-4.00469	6.20981e-05	0.000716996
Egr1	7028.26	-0.779571	0.194703	-4.00389	6.23082e-05	0.000718895
Gal3st3	1738.68	-0.374649	0.0935781	-4.0036	6.23864e-05	0.000719271
Tcf19	170.164	-0.711454	0.177739	-4.00281	6.25952e-05	0.00072115
Dusp6	1893.8	-0.762441	0.190534	-4.00159	6.29173e-05	0.000723273
Hace1	1777.82	-0.290734	0.0728096	-3.99307	6.52234e-05	0.000746792
Gm608	3932.63	-0.378056	0.09468	-3.99298	6.52477e-05	0.000746792
9630033F20Rik	1371.04	-0.272238	0.0681896	-3.99237	6.54171e-05	0.000748187
Mgat5	2203.63	-0.287886	0.0721631	-3.98938	6.62467e-05	0.000756576
Epha10	933.154	-0.828497	0.207832	-3.98639	6.70867e-05	0.00076506
Slc25a22	7393.36	-0.279788	0.0701991	-3.98563	6.73e-05	0.000766938
Flrt1	1091.11	-0.634806	0.15929	-3.98521	6.74206e-05	0.000767756
Myh10	14984.1	-0.28056	0.0704324	-3.98339	6.79391e-05	0.000773102
Ipcef1	4825.7	-0.518349	0.130165	-3.98225	6.8267e-05	0.000776273
Kiss1	8.56757	-3.60725	0.906289	-3.98025	6.88438e-05	0.000782267
Brsk1	13804.8	-0.288255	0.0724431	-3.97905	6.91914e-05	0.000785083
Pgs1	2288.42	-0.269224	0.0676884	-3.9774	6.9672e-05	0.000789967
Nwd2	2002.79	-0.537802	0.135228	-3.977	6.97892e-05	0.000790159
Pim1	225.284	-0.725117	0.182428	-3.97482	7.04314e-05	0.000796285
Nxph3	538.429	-0.801754	0.201722	-3.97455	7.05138e-05	0.000796644
Otud1	974.603	-0.468433	0.117871	-3.97411	7.06435e-05	0.000797538
Wnt10a	202.332	-0.739183	0.186018	-3.97371	7.07618e-05	0.000798301
Atg12	2736.62	-0.277338	0.0698357	-3.97129	7.14847e-05	0.000804727
Akap5	2906.35	-0.666313	0.16784	-3.96992	7.1896e-05	0.000808538
Kcnk2	1982.1	-0.429508	0.108233	-3.96837	7.2366e-05	0.000812904
Cdkl5	2645.75	-0.452528	0.114048	-3.96788	7.25158e-05	0.000814006
Gm1976	883.301	-0.465258	0.117309	-3.9661	7.30593e-05	0.00081894
Lama3	157.256	-0.856839	0.216457	-3.95848	7.54298e-05	0.000844309
Htt	8911.96	-0.292614	0.073948	-3.95702	7.58909e-05	0.000848867
Melk	17.0965	-1.72385	0.435804	-3.95556	7.63566e-05	0.000853471
Golt1a	19.1883	-2.10148	0.531601	-3.95313	7.71368e-05	0.000860969
Herc2	11716	-0.357526	0.0904743	-3.95168	7.76037e-05	0.000865567
Xxylt1	1180.21	-0.293257	0.074229	-3.95071	7.79191e-05	0.000867242
Mas1	249.089	-0.648715	0.164196	-3.95086	7.78703e-05	0.000867242
Reps2	11054.4	-0.314412	0.0795928	-3.95026	7.80657e-05	0.00086826
1190002N15Rik	5731.47	-0.611236	0.154744	-3.94997	7.81596e-05	0.000868691
Map3k5	2125.54	-0.452968	0.114952	-3.94051	8.13088e-05	0.000900515
Eps8	3547.9	-0.467035	0.118694	-3.9348	8.32672e-05	0.00092091
Kcnn2	1161.1	-0.280251	0.0713359	-3.92861	8.54372e-05	0.000942923
Fads2	2931.13	-0.318379	0.0810389	-3.92872	8.5399e-05	0.000942923
Mpp2	4455.83	-0.276578	0.0705173	-3.92214	8.77675e-05	0.000967286
Tnfrsf8	14.3868	-2.09818	0.53536	-3.9192	8.8843e-05	0.000978453
Foxp1	3519.97	-0.41301	0.105458	-3.91633	8.99053e-05	0.00098877
Itgav	5118.43	-0.480798	0.123008	-3.90867	9.28058e-05	0.00101783
Fam19a5	4198.17	-0.294311	0.0753084	-3.90807	9.30364e-05	0.00101964
Dlg1	7981.23	-0.326087	0.0835066	-3.90492	9.42557e-05	0.00103157
Smoc2	299.95	-0.780805	0.200115	-3.90179	9.54858e-05	0.00104359
Mtpn	17824	-0.278779	0.0715025	-3.89887	9.66433e-05	0.0010555
Lmo2	562.921	-0.430244	0.110386	-3.89763	9.71375e-05	0.0010587
Cyb561d1	863.932	-0.331305	0.0851043	-3.89293	9.9042e-05	0.00107796
Smarca2	12308.5	-0.291317	0.074967	-3.88594	0.000101935	0.00110665
Nkd1	645.486	-0.443721	0.114188	-3.88588	0.000101959	0.00110665
Npas2	1009.28	-0.603882	0.155496	-3.8836	0.000102922	0.00111634
Slc24a3	5143.09	-0.38081	0.0980712	-3.883	0.000103177	0.00111682
Lsp1	89.9702	-0.724366	0.186548	-3.88299	0.000103179	0.00111682
Vcpkmt	508.729	-0.481728	0.124124	-3.881	0.000104027	0.00112522
Oxr1	14854.3	-0.310452	0.0800693	-3.87729	0.000105624	0.00114093
Gas2l1	1540.71	-0.302971	0.0781938	-3.87461	0.000106796	0.001152
Phtf2	934.994	-0.385106	0.0994459	-3.87252	0.000107715	0.00116113
Ackr2	68.0329	-0.915996	0.2368	-3.86822	0.000109633	0.00117938
Extl3	7090.66	-0.331288	0.0857168	-3.86491	0.000111129	0.00119384
Car2	6654.33	-0.332063	0.0860789	-3.85765	0.00011448	0.00122733
Pvalb	7930	-0.619245	0.16065	-3.85461	0.000115912	0.00124015
Slc28a1	6.03372	-3.41943	0.887091	-3.85465	0.000115894	0.00124015
Ttc3	41669.7	-0.279341	0.0724952	-3.85323	0.000116569	0.00124548
B4galt2	2257.01	-0.368961	0.0958957	-3.84752	0.000119317	0.00127312
Fam126b	7082.29	-0.37318	0.0970263	-3.84617	0.000119976	0.00127756
Fam132b	8.76623	-2.9446	0.76564	-3.84593	0.000120094	0.00127794
Erf	1262.55	-0.426349	0.111	-3.84099	0.000122538	0.00130131
Igsf11	1023.1	-0.415493	0.108328	-3.83552	0.000125298	0.00132615
Ppapdc2	2518.55	-0.305157	0.0796271	-3.83233	0.000126935	0.00134258
St6gal2	372.31	-0.562503	0.146882	-3.82963	0.000128338	0.0013556
Lemd1	24.557	-1.47253	0.384806	-3.82667	0.00012989	0.00137052
St8sia5	3497.38	-0.486452	0.127124	-3.8266	0.000129925	0.00137052
Sytl2	2239.33	-0.605839	0.15836	-3.82569	0.000130404	0.00137465
Tmem14a	1061.74	-0.478332	0.12519	-3.82085	0.000132995	0.00139823
Actn1	2156.16	-0.414936	0.108649	-3.81905	0.000133968	0.00140752
Podxl	1527.64	-0.338472	0.0886589	-3.81769	0.000134709	0.00141342
Myod1	5.50404	-4.25471	1.11588	-3.81288	0.000137355	0.00144021
Rab31	3443.97	-0.271363	0.0711818	-3.81225	0.000137706	0.00144233
Vstm2l	2305.33	-0.530491	0.139157	-3.81219	0.00013774	0.00144233
1110032F04Rik	325.216	-0.980536	0.257349	-3.81015	0.000138885	0.00145143
Mllt1	2858	-0.303168	0.0796018	-3.80855	0.000139782	0.00145694
Cdc42bpa	17564.8	-0.272213	0.0715056	-3.80688	0.000140733	0.00146587
Gabbr1	25956.7	-0.252652	0.0663773	-3.8063	0.000141063	0.00146835
Lamc2	415.577	-0.568819	0.149471	-3.80555	0.00014149	0.00147148
Herc1	11594.5	-0.275144	0.0723027	-3.80544	0.000141551	0.00147148
Srgap3	17884.4	-0.355756	0.0935592	-3.80247	0.000143263	0.00148829
Oprd1	415.585	-1.12573	0.296109	-3.80174	0.000143686	0.0014917
Cdh22	2285.68	-0.5514	0.145162	-3.79851	0.000145567	0.00150924
Eng	910.153	-0.391322	0.103074	-3.79653	0.000146737	0.00152037
Fam105a	514.437	-0.367056	0.0967264	-3.79478	0.000147773	0.00152969
Ddx19b	1559.21	-0.321573	0.0848445	-3.79014	0.000150562	0.00155693
Bzrap1	8509.9	-0.400037	0.105555	-3.78983	0.000150748	0.00155783
Ptprj	5771.17	-0.506381	0.133676	-3.78813	0.000151786	0.0015665
Mllt6	8519.12	-0.393815	0.10406	-3.78449	0.000154023	0.0015875
Cyp11a1	71.2709	-0.894044	0.236378	-3.78226	0.000155408	0.00160073
Sema4a	1080.41	-0.555906	0.146991	-3.7819	0.000155637	0.00160205
Rnf157	10079.8	-0.374764	0.0990991	-3.78171	0.000155756	0.00160223
Rbp4	276.013	-0.661272	0.175113	-3.77626	0.000159201	0.00163446
Arnt2	10375.9	-0.368207	0.0975137	-3.77595	0.000159397	0.00163541
Wasf1	7378.31	-0.279022	0.074079	-3.76654	0.000165524	0.00169275
Sun2	2605.91	-0.393417	0.104534	-3.76353	0.000167534	0.00170905
Acvrl1	507.278	-0.353852	0.094022	-3.7635	0.000167552	0.00170905
Cdr2l	1740.55	-0.375282	0.0997576	-3.76194	0.000168599	0.00171639
Rab40c	1233.55	-0.296822	0.0789835	-3.75802	0.000171262	0.00174126
Numb	1838.57	-0.340458	0.0908278	-3.74839	0.000177971	0.00180364
Ccnjl	321.308	-0.631492	0.168552	-3.74657	0.000179272	0.00181333
Gm6277	183.812	-0.561964	0.150102	-3.74387	0.000181208	0.00183056
Pdzd2	2158.57	-0.516742	0.138122	-3.7412	0.000183142	0.00184773
Sdk1	307.996	-0.631835	0.168927	-3.74027	0.00018382	0.00185338
Susd2	254.453	-0.851324	0.227709	-3.73864	0.000185016	0.00186425
H2-Bl	31.9701	-1.81391	0.485552	-3.73577	0.000187143	0.00188326
Nova1	4062.21	-0.301393	0.0807422	-3.73279	0.000189373	0.001902
Otop2	25.2999	-1.865	0.499896	-3.73077	0.000190896	0.00191248
Ptk7	370.812	-0.474555	0.127265	-3.72887	0.000192338	0.00192571
Wipf2	4351.31	-0.355539	0.0954146	-3.72626	0.000194344	0.00194455
Dclk1	30923.9	-0.457347	0.122776	-3.72504	0.000195283	0.00195146
Gas7	22942	-0.470894	0.126463	-3.72357	0.000196425	0.00195915
Ncan	6144.5	-0.62636	0.168267	-3.72241	0.000197331	0.00196694
Fzd9	171.211	-0.63382	0.170345	-3.72081	0.000198588	0.00197696
2022-09-08	10045.9	-0.264088	0.0710438	-3.71726	0.000201396	0.00199986
Myh13	8.40996	-2.88845	0.777376	-3.71564	0.000202691	0.00200892
Zbtb1	616.173	-0.385646	0.103904	-3.71155	0.000205995	0.00203911
Rmnd5a	11969.3	-0.264318	0.0712372	-3.71039	0.000206941	0.00204711
Fnip1	3652.45	-0.252581	0.0680882	-3.70962	0.000207572	0.00205085
Atg4c	1744.02	-0.254344	0.0685901	-3.70817	0.000208761	0.0020613
Notch4	243.7	-0.540451	0.145827	-3.7061	0.000210478	0.00207696
Ncs1	10076.5	-0.332672	0.0898854	-3.70107	0.000214692	0.00211457
Kcns2	1120.2	-0.304365	0.0822818	-3.69906	0.000216401	0.00213007
Myt1l	9506.74	-0.304901	0.0825402	-3.69397	0.000220778	0.00216638
Acsl3	7279.68	-0.264815	0.0717186	-3.69242	0.000222126	0.00217825
Tnfrsf25	46.6408	-1.68722	0.457135	-3.69085	0.000223504	0.00218903
Cgrrf1	876.095	-0.330908	0.0897161	-3.68839	0.00022568	0.00220213
Crot	1353.14	-0.26878	0.0728717	-3.6884	0.000225671	0.00220213
Cyp51	2676.93	-0.261112	0.0708486	-3.68549	0.000228261	0.00222318
Myh7	206.02	-2.32803	0.631953	-3.68386	0.000229725	0.00223606
Srf	1682.4	-0.320933	0.087143	-3.68283	0.000230656	0.00224235
Lypd1	1181.96	-0.542024	0.14722	-3.68174	0.000231652	0.00225064
Ncor2	5753.07	-0.462518	0.125706	-3.67937	0.000233812	0.00226743
Hivep3	2177.53	-0.505923	0.137776	-3.67207	0.000240596	0.00232463
Fasn	9069.09	-0.353675	0.0964315	-3.66762	0.000244814	0.00236248
Atp1a2	50867	-0.384358	0.104844	-3.66601	0.000246365	0.00237309
2810459M11Rik	440.903	-0.414507	0.113096	-3.66508	0.000247266	0.00238031
Dgat2l6	6.72947	-2.86377	0.781808	-3.663	0.000249274	0.00239818
Gli3	444.057	-0.475972	0.129956	-3.66257	0.000249699	0.0024008
Nfib	8061.34	-0.400132	0.109297	-3.66098	0.000251257	0.00241283
Klhl23	3800.75	-0.305963	0.083686	-3.65608	0.000256098	0.00245633
Gm11744	95.2427	-0.793835	0.217254	-3.65395	0.000258234	0.00247531
Lgi3	4527.53	-0.251917	0.0690415	-3.64878	0.000263488	0.002518
Peg10	1544.27	-0.624261	0.171241	-3.64551	0.000266865	0.00254873
Slitrk1	4706.26	-0.298257	0.0818221	-3.64519	0.000267196	0.00255035
Myo6	6297.79	-0.312909	0.0859288	-3.64149	0.000271064	0.00258257
Cops7b	617.318	-0.2937	0.0806692	-3.64079	0.000271798	0.002588
Klf9	9395.16	-0.28885	0.0793985	-3.63798	0.000274785	0.00261328
Kcns1	563.004	-0.526203	0.144675	-3.63714	0.000275685	0.00262026
Unc13b	1312.25	-0.415515	0.114257	-3.63667	0.000276187	0.00262187
Gm11762	37.396	-1.14903	0.316014	-3.63599	0.000276916	0.00262624
Cdh11	2050.96	-0.415338	0.114235	-3.63581	0.000277114	0.00262624
Eepd1	750.315	-0.465535	0.128043	-3.63577	0.000277149	0.00262624
Rnf166	968.855	-0.251353	0.069146	-3.6351	0.000277871	0.0026315
Armc4	40.981	-1.35936	0.374038	-3.63427	0.00027877	0.00263844
Mapk8ip1	14281.2	-0.251304	0.0691759	-3.63283	0.000280327	0.00265158
Mxd1	1256.52	-0.392561	0.108071	-3.63242	0.000280779	0.00265425
Kcnk1	6337.27	-0.353434	0.097318	-3.63175	0.000281508	0.00265955
Samd3	61.8296	-1.70601	0.469804	-3.63132	0.000281971	0.00266083
Pop5	1082.73	-0.581927	0.160252	-3.63131	0.000281981	0.00266083
Cort	85.6913	-1.00325	0.276705	-3.62572	0.000288158	0.00271586
Secisbp2l	7486.41	-0.257477	0.0711001	-3.62132	0.000293098	0.00276077
Cerk	7739.75	-0.318588	0.0880121	-3.61982	0.000294813	0.00277526
Nacc2	9112.14	-0.40935	0.113177	-3.6169	0.000298147	0.00280284
Pom121	3132.47	-0.325633	0.0900537	-3.61599	0.000299207	0.0028099
Per1	2935.47	-0.737063	0.203848	-3.61575	0.000299483	0.00281083
Usp32	8254.54	-0.282378	0.0781379	-3.61384	0.000301695	0.00282653
3110035E14Rik	8935.11	-0.573432	0.158686	-3.61364	0.000301927	0.00282702
Ascl1	139.259	-0.770175	0.213152	-3.61327	0.000302358	0.00282938
Mbnl1	5525.23	-0.308257	0.085408	-3.60923	0.000307111	0.00287044
Kcnk9	694.798	-0.412835	0.114453	-3.60703	0.000309725	0.00288973
9530036O11Rik	22.9369	-1.55362	0.430708	-3.60713	0.000309606	0.00288973
B4galnt1	3184.37	-0.264613	0.0734823	-3.60104	0.000316946	0.00294489
Rasl11a	137.577	-0.874861	0.243115	-3.59855	0.000319991	0.00296793
Car8	40168.5	-0.532826	0.148101	-3.59772	0.000321023	0.00297373
Rps6ka3	3897	-0.413351	0.114893	-3.59772	0.000321021	0.00297373
Ddit3	571.28	-0.317907	0.0883901	-3.59663	0.000322364	0.00298116
Sac3d1	471.852	-0.420325	0.116876	-3.59632	0.000322747	0.00298295
Ccnd1	2036.25	-0.506272	0.140945	-3.592	0.000328154	0.00302937
Slc39a14	1450.65	-0.296241	0.0825	-3.5908	0.000329665	0.00304153
Gpt	411.337	-0.365689	0.101896	-3.58884	0.000332149	0.00305907
Fam171a1	2715.81	-0.327233	0.0911915	-3.58841	0.000332699	0.00306235
Cdr2	806.78	-0.424345	0.118408	-3.58374	0.000338712	0.00310861
Timp4	2909.74	-0.329141	0.0920244	-3.57668	0.00034799	0.00318985
Calb1	23191.9	-0.433644	0.121309	-3.5747	0.000350631	0.00320865
C330006A16Rik	2986.03	-0.301508	0.0843591	-3.5741	0.000351436	0.00321315
Mknk2	1549.87	-0.292044	0.0817463	-3.57257	0.0003535	0.00322741
Armc7	287.085	-0.380353	0.106484	-3.57194	0.000354345	0.00323137
Slc25a25	2602.61	-0.264188	0.0739595	-3.57206	0.000354178	0.00323137
Nfix	12382.1	-0.423905	0.118728	-3.5704	0.000356438	0.00324669
Purb	35996.4	-0.279167	0.0782223	-3.56889	0.000358494	0.00326354
Mslnl	8.46004	-2.99902	0.840465	-3.56829	0.000359316	0.00326724
Arhgap35	9830.26	-0.304258	0.0852875	-3.56744	0.000360491	0.00327603
Ksr2	1511.8	-0.506168	0.141901	-3.56706	0.000361015	0.00327891
Vhl	1862.37	-0.262569	0.073628	-3.56616	0.000362253	0.00328646
Zbtb40	631.978	-0.508855	0.14273	-3.56515	0.000363651	0.00329714
Dgkh	1217.18	-0.373694	0.104865	-3.56358	0.000365833	0.00331502
4930451C15Rik	29.5481	-1.50025	0.421049	-3.56313	0.000366459	0.00331879
6530402F18Rik	526.294	-0.589082	0.165451	-3.56047	0.000370198	0.00334989
Gabra4	4082.53	-0.306335	0.0860399	-3.56038	0.00037032	0.00334989
Ntrk3	3715.98	-0.321041	0.0903041	-3.55511	0.000377822	0.0034158
Metrn	4531.77	-0.407111	0.1147	-3.54935	0.000386182	0.00348139
Csrp1	8322.15	-0.254761	0.0718161	-3.5474	0.00038905	0.00350372
Srpk1	1903.8	-0.407232	0.114799	-3.54737	0.000389104	0.00350372
Slc2a13	5982.86	-0.39931	0.112698	-3.54319	0.000395315	0.00355355
Lipg	108.986	-0.916135	0.258649	-3.54201	0.000397097	0.00356753
Trim9	10121.5	-0.358557	0.101265	-3.54079	0.000398926	0.00357619
Ptar1	794.581	-0.448328	0.126647	-3.53999	0.000400148	0.00358268
Cplx3	211.53	-1.01879	0.288221	-3.53474	0.000408179	0.00364629
Ryr2	10084.9	-0.456099	0.129234	-3.52924	0.000416752	0.00371655
Dopey2	4213.4	-0.292053	0.0828146	-3.52659	0.00042095	0.00374974
Lrg1	35.332	-1.3891	0.39445	-3.52162	0.00042892	0.00381426
Ism1	181.792	-0.545166	0.15495	-3.51834	0.000434248	0.00385077
Tle3	2501.15	-0.378432	0.10761	-3.5167	0.000436945	0.00387251
Kcnab2	12356.3	-0.431591	0.122795	-3.51473	0.000440195	0.00389474
Purg	650.158	-0.396943	0.112947	-3.51441	0.000440734	0.00389731
Lrrc3	368.018	-0.413755	0.117771	-3.51321	0.000442731	0.00390837
Rnf144b	1297.19	-0.348623	0.0992363	-3.51306	0.000442977	0.00390837
Ephx1	919.621	-0.518062	0.147474	-3.5129	0.000443252	0.00390861
Tcte1	49.3287	-1.2003	0.341735	-3.51236	0.000444147	0.00391431
Srebf2	6939.28	-0.277556	0.0790351	-3.51181	0.000445065	0.00392021
Axl	1937.97	-0.325549	0.0927378	-3.51043	0.000447386	0.00393405
Chd4	8789.42	-0.284846	0.0811542	-3.50994	0.000448207	0.00393907
Kif1c	4193.09	-0.338115	0.0966123	-3.49971	0.000465761	0.00406837
Stau2	4249.01	-0.269192	0.0769216	-3.49956	0.000466021	0.00406838
Hsd17b7	1143.78	-0.274554	0.0784709	-3.4988	0.000467358	0.0040778
Smug1	562.776	-0.327354	0.0937423	-3.49206	0.000479305	0.00416588
Pfkfb3	1609.17	-0.49497	0.141769	-3.49137	0.000480542	0.00417432
Tlcd1	796.43	-0.310137	0.0889565	-3.48639	0.00048958	0.00424348
Sipa1l2	2783.52	-0.402954	0.11565	-3.48424	0.000493533	0.00427539
Tnks1bp1	2284.61	-0.392985	0.112805	-3.48374	0.00049446	0.00428106
Nrg3	1547.77	-0.396177	0.113729	-3.4835	0.000494899	0.00428251
Grm4	6769.48	-1.03986	0.298674	-3.48159	0.000498448	0.00430848
Ddi2	602.812	-0.437573	0.12579	-3.4786	0.000504049	0.00435451
Osbpl6	4758.93	-0.300058	0.0862848	-3.47753	0.000506061	0.00436849
Zfp106	13575.7	-0.361731	0.104022	-3.47744	0.000506222	0.00436849
Ctxn1	6145.9	-0.542981	0.156284	-3.47432	0.000512143	0.00441716
Smim13	10653.5	-0.294647	0.0848484	-3.47262	0.000515397	0.00444036
Fam222b	1462.1	-0.264677	0.0762707	-3.47023	0.000520012	0.00447523
Inpp5d	392.555	-0.364645	0.105207	-3.46598	0.000528301	0.0045416
Ywhah	29232.8	-0.266296	0.076867	-3.46437	0.000531471	0.00456387
Tns3	3647.87	-0.254434	0.073478	-3.46273	0.000534732	0.00458234
Mast4	2598.36	-0.357858	0.103368	-3.46199	0.00053619	0.00459187
Tmem37	32.9993	-1.04324	0.301752	-3.45728	0.000545654	0.00466278
Cd7	13.7682	-1.74124	0.503961	-3.4551	0.000550092	0.00469816
Igf1r	4087.03	-0.337951	0.0978433	-3.454	0.000552333	0.00471218
Cartpt	116.496	-1.19667	0.34697	-3.44891	0.000562864	0.00479423
Spred1	10385.5	-0.454292	0.13173	-3.44866	0.000563369	0.00479471
Abhd3	2979.82	-0.327849	0.0952398	-3.44236	0.000576668	0.00488803
Lgr4	2333.18	-0.415824	0.120795	-3.44238	0.000576611	0.00488803
Stradb	1278.43	-0.284291	0.0827076	-3.4373	0.000587548	0.00497489
Epb4.1l5	413.57	-0.464758	0.135342	-3.43396	0.00059484	0.00502583
Socs3	78.9475	-0.817934	0.238393	-3.43103	0.000601291	0.00507216
Grik4	741.753	-0.326743	0.0952474	-3.43047	0.000602539	0.00507997
Map3k10	6737.61	-0.279293	0.0814398	-3.42944	0.000604833	0.00509658
Ccdc129	30.2794	-1.05836	0.308797	-3.42736	0.000609487	0.00513305
Pcsk9	101.757	-1.56266	0.456	-3.42688	0.000610552	0.00513928
Acsbg1	8068.68	-0.301288	0.0879516	-3.42561	0.00061342	0.00515791
Pcdh7	5609.44	-0.558935	0.163661	-3.41519	0.000637379	0.00535079
Sertad1	255.654	-0.620211	0.181713	-3.41313	0.000642216	0.00538566
Myh4	8.05299	-2.47653	0.725729	-3.41247	0.000643767	0.00539393
Chrm4	674.618	-0.449327	0.13168	-3.41228	0.000644231	0.00539393
Mical3	4962.22	-0.465294	0.136407	-3.41108	0.000647071	0.00541483
Prr16	468.747	-0.495678	0.145701	-3.40201	0.000668911	0.00558869
Pde11a	49.1972	-1.13024	0.332226	-3.40203	0.00066888	0.00558869
Nr2e1	378.267	-0.39755	0.116865	-3.4018	0.000669442	0.00559016
Sntb2	453.414	-0.6639	0.195404	-3.39758	0.000679857	0.00565315
Kitl	6972.28	-0.353948	0.104226	-3.39597	0.000683865	0.00568348
Elovl2	1539.93	-0.255859	0.0753551	-3.39537	0.000685357	0.00568987
Cd44	314.592	-0.666863	0.196553	-3.39278	0.000691867	0.00573787
Trim72	18.7828	-1.72166	0.507837	-3.39018	0.000698473	0.00578961
Sorl1	16742.8	-0.441906	0.130448	-3.3876	0.000705063	0.00583502
Rfc5	235.93	-0.581433	0.171766	-3.38502	0.000711727	0.0058809
Actr3b	2963.9	-0.298162	0.0881343	-3.38305	0.000716868	0.00591391
Tnfaip8l1	174.731	-0.549029	0.162309	-3.38261	0.000718015	0.00591494
Ppp1r3c	1439.02	-0.345851	0.102245	-3.38257	0.000718101	0.00591494
Pdlim1	183.887	-0.561987	0.166213	-3.38113	0.000721888	0.00594112
Arhgef2	5677.06	-0.357584	0.10576	-3.38107	0.000722034	0.00594112
Lrrc38	219.147	-0.56486	0.167162	-3.37912	0.00072718	0.00597723
Snw1	3012.46	-0.271031	0.0802216	-3.37853	0.000728743	0.00598267
Pdpk1	8081.35	-0.299454	0.0887241	-3.37512	0.000737844	0.00604909
Gpam	2172.95	-0.311194	0.0922186	-3.37453	0.000739419	0.0060557
Inpp5a	9057.5	-0.295556	0.0876631	-3.3715	0.000747594	0.00611947
Cmc2	374.619	-0.398393	0.118304	-3.36754	0.000758414	0.00619837
Dlgap2	1745.21	-0.589764	0.175251	-3.36526	0.000764719	0.00624019
Osbpl8	5814.18	-0.299381	0.0889855	-3.36437	0.000767178	0.00625701
Sox5	1807.94	-0.250685	0.0745264	-3.36371	0.000769036	0.00626892
Fam135b	1484.52	-0.457039	0.135925	-3.36244	0.000772571	0.00628797
Sema3f	363.319	-0.740352	0.220436	-3.35859	0.000783419	0.00636311
Adam11	7598.77	-0.367345	0.109512	-3.35439	0.00079539	0.00644704
Cacna2d1	9529.21	-0.298395	0.0889927	-3.35303	0.000799319	0.00647267
Sardh	507.293	-0.340619	0.101594	-3.35274	0.000800147	0.00647309
Wscd2	4282.09	-0.475483	0.141827	-3.35257	0.000800659	0.00647309
Htr1a	375.023	-1.03593	0.309013	-3.35237	0.000801226	0.00647435
Utrn	4607.93	-0.330407	0.0985812	-3.35163	0.000803378	0.00648841
Stt3b	4257.44	-0.33109	0.0988046	-3.35096	0.000805325	0.0065008
Ppargc1a	2861.69	-0.279509	0.0834228	-3.35051	0.000806628	0.00650798
Myo1b	1410.62	-0.315663	0.0942831	-3.34803	0.000813875	0.00656309
Arhgap33	4272.73	-0.386284	0.115433	-3.34639	0.000818716	0.00659538
Rock2	11701.2	-0.416861	0.124605	-3.34544	0.000821514	0.00660778
Ccl27a	1025.32	-0.301799	0.0902378	-3.34449	0.000824337	0.0066271
Gm996	6504.79	-0.396412	0.118573	-3.34319	0.000828203	0.00665139
Csmd1	2116.74	-0.491201	0.146925	-3.3432	0.000828185	0.00665139
Adamts8	109.164	-0.662727	0.198345	-3.34129	0.000833895	0.00669368
Phlda1	650.301	-0.392065	0.117452	-3.33807	0.000843625	0.00675802
Pla2g5	97.0896	-0.95097	0.284926	-3.3376	0.000845042	0.00676248
Sox6	948.02	-0.335752	0.100718	-3.33358	0.000857352	0.00685403
Plxnb1	3898.23	-0.389543	0.116867	-3.33321	0.000858507	0.00685978
Rimbp2	2251.5	-0.462128	0.138669	-3.33261	0.000860365	0.00687114
Akt3	7617.8	-0.250734	0.0752637	-3.33141	0.000864067	0.00689721
Zfp459	76.2313	-0.643799	0.193263	-3.33121	0.000864697	0.00689874
Fmr1	4201.63	-0.26774	0.0803778	-3.33102	0.000865281	0.00689991
Prickle1	2325.23	-0.372472	0.111906	-3.32843	0.000873377	0.00696094
Spry2	1945.05	-0.319236	0.095934	-3.32766	0.00087578	0.00697656
Shank2	8131.7	-0.440103	0.132356	-3.32515	0.000883724	0.00702917
Mtmr12	1798.31	-0.304943	0.0917149	-3.3249	0.000884491	0.00703173
Slc8a2	8837.65	-0.405773	0.122299	-3.31786	0.000907084	0.00718957
Mxd4	1376.83	-0.284057	0.0856498	-3.31649	0.000911562	0.00721779
C730002L08Rik	248.565	-0.805877	0.243029	-3.31596	0.000913274	0.00722771
Htr1b	236.765	-0.673216	0.203232	-3.31255	0.00092448	0.00729441
Cml3	52.6602	-0.842417	0.254355	-3.31198	0.000926387	0.00730214
Tmem170b	4743.68	-0.27018	0.0816858	-3.30755	0.00094116	0.00740376
Rab3c	21302.8	-0.46731	0.141303	-3.30714	0.000942528	0.00741082
Gldc	1217.25	-0.352985	0.106742	-3.3069	0.000943356	0.00741363
Sdk2	357.609	-0.735899	0.222592	-3.30605	0.000946217	0.0074287
Sec1	19.3762	-1.52558	0.461515	-3.30559	0.000947778	0.00743354
Smim1	322.965	-0.546017	0.165199	-3.30522	0.000949025	0.00743962
Ppara	286.183	-0.434961	0.131679	-3.30319	0.000955911	0.00748987
Atf4	5226.92	-0.274534	0.0831425	-3.30198	0.000960063	0.00751866
Zmat4	1757.24	-0.581296	0.176091	-3.3011	0.000963055	0.00753835
1700030J22Rik	265.605	-0.533783	0.161859	-3.29782	0.000974372	0.00761936
Slc22a23	3097.83	-0.274122	0.0831601	-3.29632	0.000979612	0.00765273
1700001L05Rik	162.186	-0.767049	0.23315	-3.28994	0.00100209	0.00779741
Axin2	1149.03	-0.385401	0.11717	-3.28925	0.00100456	0.00781019
Mgat5b	2620.21	-0.320143	0.0973474	-3.28866	0.00100665	0.00782131
Auts2	3177.21	-0.423153	0.128681	-3.28838	0.00100764	0.00782512
Shc3	1369.45	-0.550594	0.167504	-3.28706	0.00101241	0.00785438
Wdr90	553.46	-0.437162	0.133017	-3.2865	0.0010144	0.00786598
Pik3r2	4376.66	-0.276395	0.0841202	-3.28572	0.00101722	0.00788399
Cd320	362.047	-0.328216	0.100018	-3.28157	0.00103231	0.00799302
Trim54	5.51747	-3.36242	1.02541	-3.27911	0.00104135	0.00805904
Pdyn	382.528	-1.38099	0.421235	-3.27842	0.00104389	0.0080656
Adam22	12788.7	-0.279482	0.0853394	-3.27495	0.00105681	0.00813475
Tanc1	2844.75	-0.61081	0.186519	-3.2748	0.00105738	0.0081352
Stac3	53.4082	-1.06691	0.326068	-3.27205	0.0010677	0.00821054
Gpr17	1276.15	-0.484024	0.14796	-3.27132	0.00107045	0.0082277
Fam84b	493.419	-0.636726	0.194653	-3.27109	0.00107134	0.00823047
Scnn1a	110.047	-0.768303	0.234982	-3.26962	0.00107692	0.00826931
6430584L05Rik	94.5132	-0.606853	0.185615	-3.26942	0.00107768	0.00827115
Arid3b	227.864	-0.563435	0.172427	-3.26767	0.00108438	0.00831044
Ubtd2	2236.59	-0.367672	0.112536	-3.26714	0.00108639	0.00832046
Dlgap4	9038.55	-0.285884	0.0875053	-3.26705	0.00108675	0.00832046
Vcan	900.454	-0.288065	0.0881854	-3.26659	0.00108852	0.00832995
Mxd3	11.0809	-1.87611	0.575469	-3.26014	0.00111355	0.00848856
Gdpd5	1254.32	-0.745525	0.229068	-3.25461	0.0011355	0.00865165
Ptgs1	429.508	-0.345184	0.106151	-3.25182	0.0011467	0.00873275
Gpr123	1777.85	-0.396439	0.122065	-3.24776	0.00116319	0.00883276
Htr6	59.4617	-0.827875	0.255186	-3.24421	0.00117778	0.00893062
Qk	21170.8	-0.353493	0.108997	-3.24315	0.00118218	0.00895964
Slc4a8	4923.9	-0.30108	0.0928548	-3.24248	0.00118496	0.00897206
Nmt2	3990.99	-0.336344	0.103738	-3.24223	0.00118596	0.00897537
Stk35	1604.59	-0.270328	0.0834665	-3.23876	0.00120052	0.00908116
Pcdh1	3225.68	-0.443518	0.137035	-3.23653	0.00120993	0.00913043
Rspo2	288.621	-0.595167	0.184044	-3.23383	0.00122143	0.00919954
Gucy1a2	6495.53	-0.343201	0.106166	-3.23268	0.00122635	0.00922782
Camsap1	4962.12	-0.290264	0.0898323	-3.23118	0.00123281	0.00926752
Plekhg5	1479	-0.457241	0.141598	-3.22915	0.0012416	0.00932152
Klhdc8a	844.192	-0.457003	0.141573	-3.22805	0.00124639	0.00935181
Slc4a1	37.3219	-1.7188	0.532741	-3.22634	0.00125385	0.0094033
Dpf1	1152.97	-0.321421	0.0998925	-3.21767	0.00129236	0.00965989
Ina	6565.54	-0.258102	0.0802389	-3.21667	0.00129686	0.00968436
Samd8	5188.22	-0.26509	0.0825077	-3.21291	0.00131397	0.00979817
Zswim5	815.316	-0.393886	0.122684	-3.21058	0.00132468	0.00986405
Sertm1	601.918	-0.732031	0.228063	-3.20977	0.00132842	0.00988718
Kcnq2	4850.39	-0.384745	0.119947	-3.20763	0.00133834	0.00994225
Lrrc8c	560.298	-0.396125	0.123492	-3.2077	0.00133801	0.00994225
Dgki	1636.66	-0.323526	0.100897	-3.20649	0.00134364	0.0099722
Hmcn1	307.156	-0.571857	0.178369	-3.20604	0.00134574	0.00998306
Ppp1r1a	1704.56	-0.425903	0.132933	-3.2039	0.00135579	0.0100434
Il1rapl1	386.231	-0.328096	0.102438	-3.20288	0.00136059	0.0100742
Gm5069	241.276	-0.566872	0.177001	-3.20265	0.00136169	0.0100777
Bmp1	3127.47	-0.493316	0.154154	-3.20015	0.00137355	0.0101464
Id4	2884.2	-0.349987	0.109415	-3.19871	0.00138045	0.0101925
Rtn4rl2	782.512	-0.432407	0.135367	-3.19433	0.00140156	0.0103145
Tdrp	591.342	-0.302988	0.0949231	-3.19193	0.00141324	0.0103872
Pgam2	42.3692	-1.12093	0.351527	-3.18875	0.00142889	0.0104814
Dvl3	2185.39	-0.291845	0.0917153	-3.18207	0.00146226	0.0106801
Ak5	3585.15	-0.464688	0.146038	-3.18197	0.00146276	0.0106801
Adra1a	469.842	-0.455828	0.143328	-3.18031	0.00147118	0.0107316
Hopx	2965.77	-0.357094	0.112407	-3.17679	0.00148913	0.0108324
Ptp4a1	570.135	-0.370838	0.116847	-3.17371	0.00150504	0.0109281
Cacnb1	3122.98	-0.389978	0.122908	-3.17292	0.00150913	0.0109526
Boc	2212.72	-0.427932	0.13489	-3.17246	0.00151152	0.010965
Smg7	4984.71	-0.322823	0.101793	-3.17138	0.00151716	0.0109958
Grin2c	6472.82	-0.495181	0.156427	-3.16557	0.00154781	0.0111921
Ank2	29327.3	-0.335839	0.106089	-3.16563	0.00154748	0.0111921
Asic1	3033.21	-0.293661	0.0928032	-3.16434	0.00155436	0.0112292
Bcor	1099.65	-0.625063	0.197642	-3.1626	0.00156367	0.0112861
Foxred2	1180.15	-0.256478	0.0811169	-3.16184	0.00156778	0.0113105
B230312C02Rik	23.105	-1.80153	0.570192	-3.15952	0.0015803	0.01138
3110062M04Rik	122.98	-0.509869	0.161494	-3.1572	0.00159291	0.0114551
Cacna2d4	87.9489	-0.672294	0.213061	-3.1554	0.00160277	0.0115155
Helz2	242.992	-0.580731	0.184133	-3.15387	0.00161123	0.0115552
Cthrc1	300.235	-0.628829	0.19962	-3.15013	0.001632	0.0116829
Aqp4	14021.3	-0.378636	0.120195	-3.15018	0.00163168	0.0116829
Aqp6	498.281	-1.22671	0.389475	-3.14965	0.00163467	0.0116967
Dexi	1268.97	-0.28102	0.0893274	-3.14595	0.00165548	0.0118402
Avpi1	447.609	-0.604363	0.192173	-3.14488	0.00166155	0.0118728
Cdhr2	11.5762	-1.75032	0.556787	-3.14361	0.00166878	0.0119062
Fam206a	877.608	-0.260859	0.0829772	-3.14374	0.00166805	0.0119062
Slc9a9	679.274	-0.344514	0.109734	-3.13953	0.00169219	0.0120318
Sec14l2	1248.29	-0.291184	0.0927655	-3.13893	0.00169568	0.0120457
S100a6	280.257	-0.640568	0.204086	-3.13872	0.00169687	0.0120487
Ppp6r1	5921.9	-0.269772	0.0860069	-3.13663	0.001709	0.0121134
Nefl	11100.9	-0.3924	0.125149	-3.13548	0.00171576	0.0121445
Irf2	1018.64	-0.271911	0.0868026	-3.13252	0.00173314	0.0122565
Kcng2	131.71	-0.691129	0.220813	-3.12993	0.00174845	0.0123482
Gm10432	85.9327	-0.641224	0.205283	-3.12361	0.00178649	0.0125998
Orai3	771.377	-0.295409	0.0946234	-3.12195	0.00179659	0.0126597
Mef2c	22590.5	-0.29198	0.09361	-3.11911	0.00181397	0.0127707
Itga4	598.325	-0.472507	0.1515	-3.11886	0.0018155	0.0127758
Uxs1	1133.02	-0.316829	0.101632	-3.1174	0.00182451	0.0128335
Tmem132b	4012.57	-0.492305	0.157998	-3.11589	0.00183389	0.0128938
Egfr	621.291	-0.405731	0.130287	-3.11414	0.00184482	0.0129474
Gm10421	14.4271	-1.62777	0.523095	-3.11181	0.00185946	0.0130367
Raver2	689.347	-0.304474	0.0978855	-3.11051	0.00186764	0.0130785
Sla2	15.4135	-1.54858	0.497913	-3.11015	0.00186994	0.0130888
Triobp	884.747	-0.430865	0.138565	-3.10947	0.00187423	0.0131129
Adamtsl2	153.684	-0.578502	0.186072	-3.10902	0.00187708	0.0131222
Wipi1	814.133	-0.257787	0.0829751	-3.1068	0.00189127	0.013197
Reep6	418.726	-0.470363	0.151473	-3.10526	0.00190113	0.013254
Ednrb	4192.21	-0.362333	0.116835	-3.10124	0.00192715	0.0134058
Pcgf3	1780.88	-0.280365	0.090477	-3.09874	0.00194344	0.0134893
Sel1l3	4793.95	-0.39063	0.126102	-3.09774	0.00195005	0.0135233
Twf2	1022.96	-0.322023	0.104028	-3.09555	0.00196451	0.0136027
N28178	7232.02	-0.340488	0.110004	-3.09524	0.00196657	0.0136079
Smarcc1	2788.65	-0.257425	0.0833556	-3.08828	0.00201321	0.0139001
Rad1	331.829	-0.385168	0.12475	-3.08753	0.00201829	0.0139229
Anxa11	666.95	-0.430828	0.139781	-3.08216	0.00205501	0.0141638
Cideb	127.874	-0.508344	0.164988	-3.0811	0.00206235	0.014202
Kcnab1	5569.3	-0.285307	0.0926746	-3.07859	0.00207984	0.0143044
Cyb5r4	1816.95	-0.28492	0.0926512	-3.07519	0.00210371	0.0144489
Cdk17	7346.58	-0.306444	0.0996555	-3.07503	0.00210478	0.01445
Fam160a1	128.262	-0.567584	0.184629	-3.07419	0.00211074	0.0144782
8430427H17Rik	2147	-0.394523	0.128458	-3.07122	0.00213186	0.0146104
Grin2b	3033.67	-0.564657	0.184049	-3.06798	0.00215515	0.0147507
Cables1	827.705	-0.406633	0.132706	-3.06416	0.0021828	0.014927
Galt	1382.83	-0.272253	0.0888707	-3.06347	0.00218787	0.0149552
Asb13	2562.22	-0.274331	0.0895626	-3.06301	0.00219121	0.0149715
Rnd2	1531.67	-0.360706	0.11777	-3.06279	0.00219285	0.0149762
Stk40	1647.99	-0.386906	0.126383	-3.06137	0.00220326	0.0150149
Esyt1	716.549	-0.343023	0.112057	-3.06115	0.00220492	0.0150196
Fbxl15	490.314	-0.337967	0.110519	-3.05801	0.00222814	0.015145
Opcml	8584.36	-0.387803	0.126847	-3.05726	0.00223374	0.01517
Med1	2453.19	-0.346522	0.113351	-3.05708	0.00223503	0.0151722
Zmat3	6279.56	-0.339512	0.111071	-3.05671	0.00223783	0.0151781
Lingo2	776.548	-0.474131	0.155173	-3.0555	0.00224684	0.0152326
Akap6	11238.2	-0.270728	0.0886214	-3.05488	0.00225149	0.0152576
Paqr9	1198.8	-0.301835	0.0988335	-3.05397	0.00225833	0.0152974
Apbb2	2862.35	-0.441133	0.144479	-3.05327	0.00226361	0.01532
Tm6sf2	35.5435	-1.16741	0.382522	-3.05188	0.00227409	0.0153711
Arhgef25	3881.62	-0.270271	0.088574	-3.05135	0.00227812	0.0153918
Itpr2	1007.54	-0.412135	0.135107	-3.05043	0.00228515	0.0154128
Pcdhac2	1876.77	-0.286029	0.0938219	-3.04864	0.00229881	0.0154983
BC006965	46.3285	-0.864721	0.283691	-3.04811	0.00230286	0.0155122
Fgf17	7.31203	-2.25903	0.741154	-3.04798	0.00230383	0.0155122
Arhgef3	3006.36	-0.268975	0.0883368	-3.04488	0.00232771	0.0156529
Cbfa2t2	2553.27	-0.283212	0.0930114	-3.04492	0.00232744	0.0156529
Slc38a3	2721.79	-0.313571	0.103022	-3.04373	0.00233667	0.0157065
Fscn1	5905.3	-0.316709	0.104068	-3.04329	0.00234006	0.0157158
Otud7a	2204.58	-0.306457	0.100731	-3.04234	0.00234748	0.0157522
Klhl40	111.742	-0.757957	0.249319	-3.04011	0.00236495	0.0158559
Alad	1029.79	-0.272549	0.089666	-3.0396	0.00236894	0.0158759
Espnl	15.6219	-1.59469	0.524888	-3.03816	0.00238029	0.0159317
Caln1	4917.59	-0.39024	0.128574	-3.03515	0.00240417	0.0160778
Cic	6631.74	-0.290786	0.0959271	-3.03133	0.00243482	0.0162564
Atp8b1	120.041	-0.691864	0.22842	-3.02892	0.0024543	0.0163783
Ptprs	15589.4	-0.322175	0.106381	-3.02849	0.00245777	0.0163876
Alas2	211.292	-0.741851	0.244977	-3.02824	0.0024598	0.0163941
Gpr63	897.389	-0.55928	0.184764	-3.027	0.00246996	0.0164479
Gpr150	118.997	-0.621291	0.205274	-3.02664	0.00247289	0.0164605
Gcnt2	906.517	-0.359753	0.118997	-3.02321	0.00250111	0.0166203
Ptprf	2469.64	-0.384487	0.127208	-3.0225	0.00250693	0.0166519
Arvcf	1174.22	-0.264601	0.0875714	-3.02155	0.00251486	0.0166835
Sidt1	1883.11	-0.332269	0.109966	-3.02157	0.00251464	0.0166835
Usp12	2984.77	-0.254536	0.0843088	-3.01909	0.00253534	0.016791
Dnah1	166.065	-0.730521	0.242002	-3.01866	0.00253898	0.0168081
Mprip	12491.9	-0.302022	0.100223	-3.01351	0.00258242	0.0170813
Vti1b	3828.54	-0.271066	0.0900021	-3.01178	0.00259722	0.017172
Gpr115	59.5216	-0.718087	0.238449	-3.0115	0.00259965	0.0171808
Xk	2137.62	-0.300924	0.1	-3.00923	0.00261912	0.0172877
Dact2	1630.32	-0.592276	0.196867	-3.00851	0.00262536	0.0173217
Cbln4	463.385	-1.37456	0.45731	-3.00576	0.00264922	0.017428
Itgb8	1730.31	-0.350323	0.116561	-3.00548	0.00265162	0.0174292
Wnt7b	847.267	-0.503826	0.167748	-3.00346	0.00266925	0.0175304
Ank3	12746.2	-0.334215	0.111391	-3.00038	0.00269639	0.0176807
Slc7a4	1474.81	-0.298705	0.0995898	-2.99935	0.00270556	0.017732
Kcnk3	2854.31	-0.397233	0.132486	-2.99831	0.00271484	0.0177685
2610507B11Rik	12342.5	-0.278897	0.0930454	-2.99743	0.00272267	0.017807
Rcc2	3462.3	-0.294303	0.0982223	-2.9963	0.00273279	0.0178658
Fzd10	63.2645	-1.02923	0.343711	-2.99447	0.00274918	0.0179655
Cep170b	9545.85	-0.337017	0.112771	-2.98851	0.00280343	0.0182897
Fbln2	147.43	-0.488053	0.163728	-2.98087	0.00287433	0.0186748
Drp2	2988.45	-0.269026	0.0902608	-2.98053	0.00287746	0.0186875
Fam217b	1366.35	-0.334294	0.112166	-2.98036	0.00287913	0.0186902
Zfp599	236.755	-0.427122	0.143365	-2.97925	0.00288951	0.0187271
Adamts1	826.179	-0.44201	0.148386	-2.97878	0.00289396	0.0187482
Plekha8	1056	-0.315732	0.106019	-2.97806	0.00290081	0.0187772
Tril	3967.57	-0.339597	0.114072	-2.97704	0.0029105	0.0188244
Ahr	499.216	-0.317263	0.106632	-2.97531	0.00292696	0.0189076
Nhsl2	3946.64	-0.363046	0.122165	-2.97177	0.00296092	0.0190878
Il17ra	582.02	-0.509713	0.171551	-2.97119	0.00296646	0.0191157
1700123M08Rik	56.6607	-0.662396	0.223083	-2.96928	0.00298502	0.0192274
Cenpa	44.62	-0.757284	0.255164	-2.96783	0.00299912	0.0192919
S100b	11332.4	-0.295503	0.0996793	-2.96454	0.00303136	0.0194543
Kcnj3	3003.39	-0.28215	0.0952173	-2.96322	0.00304442	0.0195143
Anks1	1657.06	-0.256615	0.0867886	-2.95678	0.00310871	0.0198617
Rasgrf2	4521.47	-0.836118	0.283343	-2.95091	0.00316842	0.0201614
Synpr	4678.39	-0.481326	0.163164	-2.94995	0.0031783	0.020208
Nmnat2	9791.03	-0.34492	0.117001	-2.94801	0.00319828	0.0203185
Nes	452.838	-0.685535	0.232661	-2.9465	0.00321396	0.0203888
Rbm20	172.355	-0.688008	0.233525	-2.94619	0.00321714	0.0203972
Wwtr1	1138.69	-0.381087	0.129483	-2.94315	0.00324894	0.0205575
Slfn2	61.1048	-0.745844	0.253673	-2.94018	0.00328022	0.0207387
5930438M14Rik	53.1091	-0.880664	0.300077	-2.93479	0.00333773	0.0210095
Idi1	565.345	-0.277163	0.0944817	-2.93351	0.00335156	0.0210678
Gramd3	777.463	-0.314237	0.107289	-2.92888	0.00340191	0.0213453
Phkg1	564.581	-0.340089	0.116209	-2.92652	0.00342775	0.0214903
Tln2	4402.88	-0.34928	0.119368	-2.92608	0.0034326	0.0215096
Cbr3	150.384	-0.43079	0.14724	-2.92578	0.00343597	0.0215162
Rab30	931.32	-0.259331	0.0886413	-2.92562	0.00343767	0.0215182
Prcp	449.407	-0.368774	0.126113	-2.92414	0.00345405	0.0216036
Crispld1	220.269	-0.615945	0.210668	-2.92378	0.0034581	0.0216203
Zfp697	793.791	-0.354772	0.121349	-2.92358	0.00346031	0.0216256
Col26a1	89.101	-0.761841	0.260646	-2.9229	0.00346786	0.0216642
Brk1	3739.48	-0.260581	0.0891697	-2.92231	0.00347451	0.0216971
Epb4.1	4286.21	-0.29347	0.100485	-2.92054	0.00349421	0.0218115
Trim8	3490.76	-0.369055	0.126381	-2.92019	0.00349815	0.0218274
Lpo	59.6024	-1.1025	0.37767	-2.91923	0.00350897	0.0218776
Egfl8	62.1898	-0.760273	0.260702	-2.91625	0.00354268	0.0220616
Klhl29	2192.76	-0.260132	0.0892276	-2.91537	0.00355264	0.0221148
Oprk1	195.391	-1.09812	0.376867	-2.91381	0.00357052	0.0222086
Rab11fip3	4981.58	-0.263573	0.0904657	-2.91351	0.00357386	0.0222118
2022-09-09	1709.5	-0.465798	0.159903	-2.91301	0.00357965	0.022239
Med13l	5402.14	-0.336427	0.115631	-2.90947	0.00362038	0.022439
Zbtb8a	263.42	-0.4199	0.144346	-2.90898	0.00362611	0.0224656
Mmp15	713.722	-0.534721	0.183867	-2.90819	0.00363527	0.0225047
Arid5a	364.789	-0.390925	0.134443	-2.90774	0.00364052	0.0225283
Mapk11	1239	-0.383151	0.13179	-2.90729	0.00364572	0.0225428
Cpne5	1583.11	-1.07036	0.36816	-2.90733	0.00364532	0.0225428
Mast2	4444.85	-0.305578	0.105113	-2.90713	0.0036476	0.0225456
Myh1	9.72471	-1.83978	0.632974	-2.90656	0.00365428	0.022578
Prdx6	5813.84	-0.312118	0.107427	-2.90539	0.00366794	0.0226446
Rhbdf1	433.608	-0.316572	0.109278	-2.89694	0.00376818	0.0232088
Sox18	270.293	-0.585705	0.20235	-2.89451	0.00379753	0.0233622
Ephb3	602.757	-0.458139	0.158392	-2.89244	0.00382264	0.0235075
Nptx1	21899.8	-0.350608	0.121232	-2.89205	0.00382739	0.0235275
St3gal4	991.268	-0.304205	0.105217	-2.89121	0.00383756	0.0235809
Arl5b	976.517	-0.427874	0.148022	-2.89061	0.00384497	0.0236172
Dnaja4	2036.88	-0.25967	0.0898903	-2.88875	0.00386781	0.0237297
Tac2	104.793	-0.678882	0.235361	-2.88443	0.00392121	0.0239954
BC030499	195.248	-0.57709	0.200149	-2.8833	0.00393533	0.024041
Tanc2	6679.62	-0.413582	0.143439	-2.88334	0.00393486	0.024041
Tnfrsf12a	290.088	-0.62262	0.215936	-2.88335	0.00393472	0.024041
Slc25a42	982.547	-0.268592	0.0933371	-2.87765	0.00400648	0.0244093
Sstr3	839.524	-0.339136	0.117885	-2.87683	0.00401691	0.0244539
Add2	10443	-0.273889	0.0952148	-2.87654	0.00402061	0.024467
Snai3	6.57435	-2.55623	0.889111	-2.87504	0.0040398	0.0245743
Arhgef19	705.046	-0.332387	0.11564	-2.87433	0.00404892	0.0246202
Ppm1h	4678.55	-0.350952	0.12217	-2.87265	0.00407051	0.0247229
Fbxo27	520.379	-0.336744	0.117274	-2.87143	0.00408623	0.0248088
Adm	50.6293	-0.78504	0.273428	-2.8711	0.00409045	0.0248249
Thpo	113.041	-0.602618	0.210134	-2.86778	0.00413365	0.0250291
Agtpbp1	10103.4	-0.268991	0.0938601	-2.86587	0.00415863	0.0251514
Sema3g	239.642	-0.432751	0.151059	-2.86479	0.0041729	0.0252159
Amigo1	4389.79	-0.280782	0.0980164	-2.86465	0.00417476	0.0252159
Marcksl1	1589.2	-0.480932	0.167882	-2.86471	0.00417388	0.0252159
Tnrc18	4471.99	-0.30817	0.107602	-2.86398	0.00418353	0.0252436
Dzip1l	595.257	-0.261592	0.0913616	-2.86326	0.00419308	0.0252821
Trmt61a	444.738	-0.299592	0.104709	-2.86119	0.00422058	0.0254382
Baz1a	77.8428	-0.690074	0.241331	-2.85945	0.00424371	0.0255678
Nr1d2	6530.74	-0.414766	0.145182	-2.85687	0.00427841	0.025767
Slit2	1087.72	-0.561769	0.196704	-2.85591	0.00429135	0.0258153
Tmem151b	8175.13	-0.441315	0.154547	-2.85553	0.0042965	0.0258246
Ado	3376.9	-0.260632	0.0914959	-2.84856	0.00439176	0.0262788
Sigmar1	903.595	-0.28093	0.0986272	-2.8484	0.00439397	0.026282
Chst7	77.524	-0.639939	0.225035	-2.84372	0.00445895	0.0266202
Fbxl19	1886.62	-0.265809	0.0934994	-2.84289	0.00447061	0.0266595
Kifc2	13842.4	-0.264297	0.0929887	-2.84225	0.00447965	0.0267033
Nrm	100.056	-0.623248	0.21941	-2.84056	0.00450341	0.0268246
Klf10	933.709	-0.983972	0.346742	-2.83776	0.00454313	0.0270407
Aldh1a3	60.1657	-0.937798	0.330792	-2.83501	0.00458245	0.0272233
Yap1	1208.8	-0.304164	0.107381	-2.83257	0.00461755	0.0273998
Cacna1e	8470.35	-0.453206	0.160213	-2.82878	0.00467265	0.0276528
Dok3	109.289	-0.945842	0.334309	-2.82925	0.00466577	0.0276528
Nrip1	1640.33	-0.307582	0.108724	-2.82902	0.00466908	0.0276528
Kcnn1	447.124	-0.371024	0.131165	-2.82868	0.00467406	0.0276528
Uggt1	2822.54	-0.278652	0.0985513	-2.82748	0.00469162	0.0277463
Ubtf	5348.83	-0.280825	0.0993769	-2.82585	0.0047155	0.0278457
Shisa5	1449.53	-0.268619	0.095171	-2.82249	0.00476527	0.0281079
Gpr89	846.003	-0.259759	0.0920594	-2.82165	0.00477775	0.028171
Hipk2	2286.56	-0.465805	0.165153	-2.82044	0.00479577	0.0282667
B4galnt3	24.8998	-1.26808	0.449628	-2.82028	0.00479812	0.0282699
Arhgap25	176.697	-0.612672	0.217439	-2.81767	0.0048373	0.0284688
Gad1	19441.6	-0.392947	0.139497	-2.81688	0.00484928	0.0284968
Rapgef5	2111.87	-0.318853	0.113427	-2.81109	0.00493743	0.02895
Fam20a	530.744	-0.333468	0.118646	-2.8106	0.00494494	0.0289832
Col17a1	122.38	-1.02942	0.366293	-2.81038	0.00494827	0.0289919
Etv1	8071.92	-0.383731	0.136605	-2.80906	0.00496871	0.02909
Nrtn	44.8418	-0.872223	0.310519	-2.80892	0.00497083	0.0290916
Cyp4f13	239.232	-0.373668	0.133037	-2.80875	0.0049734	0.0290959
Dusp22	1019.19	-0.269345	0.0959543	-2.80701	0.00500033	0.0291883
Bend5	176.767	-0.549044	0.19571	-2.80539	0.00502557	0.0293248
C2cd4b	30.2165	-1.13339	0.404304	-2.8033	0.00505824	0.0294827
Gm2694	780.645	-0.590448	0.210825	-2.80066	0.00509981	0.029692
4930539E08Rik	233.385	-0.566794	0.202425	-2.80001	0.00511003	0.0297405
Aqp11	428.128	-0.335841	0.119997	-2.79874	0.00513025	0.0298362
Hspa1a	129.887	-0.578656	0.207	-2.79543	0.00518299	0.0300926
Mtss1l	12635.6	-0.334323	0.119627	-2.79471	0.00519464	0.0301338
St6galnac4	2009.7	-0.266076	0.0952921	-2.79222	0.00523479	0.0303098
Frmd6	1559.65	-0.507899	0.181908	-2.79207	0.00523718	0.0303125
Allc	7.58907	-1.7798	0.637521	-2.79175	0.00524238	0.0303315
Pnkd	5803.46	-0.318578	0.11412	-2.79161	0.00524466	0.0303335
Cep83	1177.24	-0.275937	0.0989025	-2.78999	0.0052709	0.0304741
Tmem40	43.4162	-1.20515	0.432144	-2.78877	0.00529086	0.0305783
6720489N17Rik	114.841	-0.554479	0.198913	-2.78754	0.00531104	0.0306611
Mall	35.6284	-1.04757	0.375901	-2.78683	0.00532272	0.0307173
Jam2	3097.84	-0.26632	0.0955914	-2.78603	0.00533582	0.0307703
Gm20939	81.8894	-0.537831	0.193072	-2.78564	0.00534215	0.0307858
Galntl6	584.37	-0.575551	0.207098	-2.77913	0.00545045	0.0312775
Batf3	11.5166	-1.70568	0.6144	-2.77618	0.0055002	0.0315336
Schip1	525.38	-0.405226	0.145997	-2.77557	0.00551048	0.031581
Sox9	1669.17	-0.454167	0.16364	-2.7754	0.00551343	0.0315864
Omg	4692.56	-0.269914	0.0973126	-2.77368	0.00554255	0.031684
Helz	1765.41	-0.356521	0.128647	-2.77131	0.00558305	0.0318788
Ccni	12778.2	-0.25822	0.0932034	-2.7705	0.005597	0.0319374
Drd4	15.0295	-1.59031	0.5743	-2.76913	0.00562069	0.0320493
Kcnip1	1454.54	-0.270723	0.0977789	-2.76873	0.00562752	0.0320766
Pstpip2	331.863	-0.328115	0.118656	-2.76525	0.00568787	0.0323738
Zfp180	2266.06	-0.320751	0.116035	-2.76427	0.00570505	0.0324247
Grk5	775.075	-0.352824	0.127659	-2.76379	0.00571336	0.0324602
Kirrel2	233.035	-0.574857	0.208263	-2.76024	0.00577582	0.0327324
Hcn2	6653.9	-0.272045	0.0986137	-2.75869	0.00580336	0.0328648
Cdc25b	553.758	-0.383348	0.139066	-2.75659	0.0058408	0.033065
Ap1s3	127.551	-0.525229	0.190645	-2.75501	0.00586906	0.0332011
Neu4	221.767	-0.39764	0.14436	-2.7545	0.00587822	0.033241
H60b	16.0499	-1.26495	0.459538	-2.75266	0.0059113	0.033404
Zfhx2	1517.06	-0.440448	0.160109	-2.75093	0.00594258	0.0335206
Abcc8	1605.49	-0.40966	0.149208	-2.74556	0.0060407	0.0339768
B230217C12Rik	2197.35	-0.306304	0.111608	-2.74448	0.00606078	0.0340654
Ephb1	2240.66	-0.285303	0.103979	-2.74385	0.00607231	0.034118
Dync1h1	20504.2	-0.275928	0.100579	-2.74338	0.00608095	0.034137
Deptor	1487.61	-0.465905	0.16988	-2.74255	0.00609644	0.0341926
Fut11	933.414	-0.272421	0.0993992	-2.74068	0.00613128	0.0343504
Nfia	4844.36	-0.433294	0.158095	-2.74072	0.00613045	0.0343504
Nfasc	11892.7	-0.344899	0.125866	-2.7402	0.00614018	0.0343656
Bcan	7448.66	-0.287397	0.104903	-2.73965	0.00615052	0.0344102
Robo4	239.425	-0.351385	0.128288	-2.73903	0.00616201	0.0344622
Esam	557.041	-0.283973	0.103743	-2.73727	0.00619519	0.0346109
1700028K03Rik	14.9452	-1.43681	0.525208	-2.73569	0.00622493	0.0347647
Marf1	7860.11	-0.398248	0.145622	-2.7348	0.00624178	0.0348006
Ptchd2	1288.48	-0.365143	0.133508	-2.73498	0.00623837	0.0348006
Adamts17	115.502	-0.564524	0.206529	-2.73338	0.00626871	0.0349102
Vgll3	66.8216	-0.77707	0.284451	-2.73182	0.00629858	0.0350023
Shc4	573.944	-0.393161	0.143918	-2.73184	0.00629815	0.0350023
Dscam	2548.55	-0.31542	0.115563	-2.72943	0.00634447	0.0351952
Herpud1	2265.1	-0.319445	0.117036	-2.72946	0.00634389	0.0351952
Eltd1	1060.8	-0.273889	0.100379	-2.72854	0.0063616	0.0352778
Tmem245	1964.08	-0.250192	0.0917037	-2.72826	0.00636689	0.0352946
Gm10684	13.8891	-2.50705	0.920113	-2.72472	0.00643554	0.0356126
Mroh2a	10.1159	-3.60399	1.32332	-2.72345	0.00646041	0.0357
Vav3	598.649	-0.409832	0.150477	-2.72356	0.00645826	0.0357
Tmem218	479.394	-0.324999	0.119406	-2.72181	0.00649259	0.0358526
Bmp2	131.374	-0.527034	0.193748	-2.72021	0.00652414	0.0360016
Med14	3469.38	-0.256019	0.094117	-2.72022	0.00652392	0.0360016
Oplah	1099.19	-0.283913	0.104379	-2.72002	0.00652783	0.0360094
Bdnf	1132.55	-0.636739	0.234138	-2.7195	0.00653803	0.0360526
Prickle2	6943.52	-0.299158	0.110019	-2.71916	0.00654482	0.0360526
Vwf	686.403	-0.441436	0.162352	-2.71901	0.00654779	0.0360564
Pla2g4b	5.63101	-3.91731	1.4419	-2.71677	0.00659218	0.0362628
Myo15	36.1313	-1.28418	0.474065	-2.70887	0.00675122	0.0369826
Ankrd9	454.282	-0.363952	0.134365	-2.70868	0.00675507	0.0369908
Amz1	267.378	-0.449422	0.16599	-2.70753	0.00677864	0.0370941
Crhr1	1570.16	-0.458908	0.16952	-2.7071	0.00678731	0.0371029
Fam3c	2437	-0.294151	0.108656	-2.70717	0.00678598	0.0371029
Raly	3464	-0.258613	0.0955747	-2.70587	0.00681255	0.0372021
Cdsn	66.1942	-0.659432	0.243805	-2.70476	0.00683545	0.0373013
Slco1c1	2173.85	-0.27712	0.102481	-2.7041	0.00684895	0.0373364
Birc6	7608.78	-0.308173	0.114213	-2.69823	0.00697088	0.0378697
Chrdl2	11.2384	-2.76793	1.02605	-2.69765	0.00698305	0.0379228
Tmem47	8148	-0.250872	0.0931563	-2.69303	0.00708066	0.0383867
Nuak1	4501.9	-0.512439	0.190429	-2.69097	0.00712446	0.0385672
Lurap1l	370.727	-0.435265	0.161742	-2.6911	0.00712166	0.0385672
Cyp2u1	365.505	-0.334398	0.124299	-2.69027	0.00713944	0.0386256
Prickle3	35.439	-0.799144	0.297074	-2.69005	0.00714416	0.0386378
Pth2r	32.6951	-0.954381	0.354925	-2.68897	0.00716734	0.0387233
Cdpf1	225.739	-0.365773	0.136087	-2.68779	0.00719272	0.0388205
Zfp648	13.9398	-1.26941	0.472925	-2.68418	0.00727088	0.0391484
Lzts1	960.851	-0.431202	0.16071	-2.68311	0.00729402	0.039246
Ncam2	3020.25	-0.267455	0.0997138	-2.68223	0.0073134	0.0393101
Rgcc	407.978	-0.35256	0.131497	-2.68113	0.00733734	0.0394166
Poln	18.441	-1.35013	0.504399	-2.67671	0.00743491	0.039901
Ccdc34	421.063	-0.276958	0.103516	-2.67552	0.00746133	0.0399938
AU023762	58.6005	-0.974771	0.364343	-2.67543	0.00746345	0.0399938
Wdr4	754.414	-0.250306	0.0937369	-2.6703	0.0075783	0.0405403
Siae	866.306	-0.295342	0.110602	-2.67032	0.007578	0.0405403
Neurl1a	7165.88	-0.316464	0.118694	-2.66621	0.0076712	0.0409399
Smarca4	6320.1	-0.299546	0.112461	-2.66355	0.00773211	0.041251
Sft2d2	1602.05	-0.277044	0.104043	-2.66278	0.00774975	0.0413171
Irak2	714.21	-0.308984	0.116052	-2.66245	0.0077573	0.0413434
Sec16b	47.982	-0.737129	0.276894	-2.66213	0.00776476	0.0413692
Hgf	172.047	-0.734499	0.275948	-2.66173	0.00777394	0.041404
Rhpn1	204.182	-0.359022	0.134933	-2.66073	0.00779712	0.0414854
Saysd1	251.489	-0.321535	0.120903	-2.65945	0.00782691	0.0416158
Fhl2	754.559	-0.498088	0.187418	-2.65763	0.00786927	0.0417873
Itgb3	171.069	-0.354963	0.133698	-2.65497	0.0079316	0.042075
Rfx3	2278.44	-0.44564	0.167934	-2.65367	0.00796226	0.0422072
4930488L21Rik	14.0639	-1.66315	0.62678	-2.65348	0.00796666	0.0422164
Acot11	2769.94	-0.357196	0.134684	-2.65211	0.00799901	0.0423592
Insig1	3007.32	-0.323667	0.122126	-2.65027	0.00804276	0.0425766
Pgm2l1	20578.5	-0.258334	0.0975343	-2.64865	0.00808143	0.0427526
Pthlh	88.9926	-0.527681	0.199242	-2.64844	0.00808653	0.0427652
Btbd3	16413.6	-0.315846	0.119266	-2.64825	0.008091	0.0427745
Ypel2	2480.86	-0.409216	0.154653	-2.64602	0.00814443	0.042956
Ascl5	9.35599	-1.51579	0.573682	-2.64222	0.00823649	0.0433544
Snn	7860.11	-0.29826	0.112907	-2.64163	0.00825079	0.0434152
Gm15800	14442.2	-0.35137	0.133081	-2.64027	0.0082839	0.0435749
Npsr1	51.5279	-1.30574	0.495057	-2.63755	0.00835071	0.0438823
Tmem229a	3667.1	-0.323355	0.122604	-2.6374	0.00835454	0.0438878
Ackr3	360.12	-0.316811	0.120223	-2.63519	0.00840906	0.0441198
Yaf2	4309.5	-0.26942	0.102239	-2.63519	0.00840892	0.0441198
Tbc1d2	120.509	-0.722326	0.274168	-2.63461	0.0084233	0.0441673
Col15a1	200.005	-0.600166	0.227943	-2.63296	0.00846435	0.0443168
Coq10b	957.176	-0.402718	0.152977	-2.63253	0.0084751	0.0443436
Klhdc7a	666.843	-0.456226	0.1733	-2.63258	0.008474	0.0443436
Stk19	458.354	-0.323922	0.123077	-2.63188	0.00849151	0.0444147
Cdc34	1195.26	-0.259614	0.0986595	-2.63142	0.00850295	0.044445
Galnt9	2630.89	-0.474548	0.180462	-2.62963	0.00854772	0.044605
Gpr25	275.684	-0.394746	0.150178	-2.62852	0.00857574	0.0447364
Syk	110.678	-0.49917	0.190035	-2.62673	0.00862092	0.0449424
Tcf4	17711.2	-0.253529	0.0965608	-2.62558	0.00865003	0.0450602
Notch1	1273.3	-0.352097	0.134146	-2.62474	0.00867158	0.0450871
Wdfy4	86.5011	-0.58677	0.223644	-2.62369	0.0086984	0.0451533
Fam184b	386.5	-0.391028	0.149045	-2.62356	0.00870153	0.0451533
Grik3	3931.22	-0.299224	0.114077	-2.62301	0.00871577	0.0451975
Vwa7	443.707	-0.956451	0.365082	-2.61982	0.00879758	0.0455917
Ccdc22	1004.39	-0.250929	0.0958126	-2.61896	0.00881985	0.045677
Pon2	2266.81	-0.270264	0.103221	-2.61829	0.00883717	0.0457517
Car4	2566.27	-0.431555	0.165005	-2.61541	0.00891211	0.0460942
Alpk2	239.998	-0.985468	0.376902	-2.61465	0.00893179	0.0461616
Mvd	607.183	-0.325095	0.12433	-2.61477	0.00892884	0.0461616
Hpse	40.0712	-1.17319	0.44878	-2.61417	0.00894434	0.0462002
Myh9	3610.27	-0.376713	0.144162	-2.61312	0.00897204	0.0462977
Mmel1	31.5737	-0.928789	0.356018	-2.60882	0.00908541	0.0468367
Barx2	153.7	-0.698101	0.267677	-2.608	0.00910734	0.0469222
Ednra	192.641	-0.541035	0.207573	-2.60648	0.00914788	0.0470971
Crh	128.615	-0.734136	0.281822	-2.60497	0.00918835	0.0472436
Trrap	5574.8	-0.291276	0.111842	-2.60436	0.00920463	0.0472998
Sncb	14878.9	-0.250541	0.0962315	-2.60353	0.00922694	0.0473802
4933417D19Rik	13.9931	-1.21893	0.468298	-2.60289	0.00924425	0.0474536
Sez6l	8828.48	-0.262742	0.10097	-2.60219	0.00926305	0.0475346
Tns1	1988.77	-0.301684	0.116067	-2.59923	0.00934342	0.0479002
Ier3	259.326	-0.535093	0.205899	-2.59881	0.00935476	0.0479427
Ptch2	75.3215	-0.983226	0.378463	-2.59795	0.00937833	0.0480479
Fn3krp	1686.42	-0.266605	0.102792	-2.59365	0.00949639	0.0485265
Stc1	104.449	-0.725563	0.279917	-2.59207	0.00954006	0.0486864
Sgcz	72.4148	-0.633361	0.24439	-2.5916	0.0095531	0.0487331
Aldh3b2	23.21	-1.07658	0.415458	-2.5913	0.00956148	0.0487484
Nav2	2708.8	-0.344832	0.133231	-2.58823	0.00964698	0.0491048
Gpr21	124.116	-0.529365	0.204552	-2.58793	0.00965553	0.0491325
Arhgap31	2629.12	-0.285067	0.110205	-2.5867	0.00969003	0.0492761
Adam8	44.3385	-0.85493	0.330579	-2.58616	0.00970513	0.0493044
Nhlh1	9.71222	-1.39961	0.541307	-2.58561	0.00972057	0.0493359
C1qtnf1	170.077	-0.434471	0.168156	-2.58374	0.00977345	0.0495723
Fosl2	896.544	-1.32811	0.514318	-2.58228	0.00981505	0.0497193
Inhba	104.413	-0.836025	0.323787	-2.58202	0.00982235	0.0497402

## Sheet: Cortex- Upregulated DEGs
Upregulated DEGs in SCA1 KI Cortex
Gene	baseMean	log2FoldChange	lfcSE	stat	pvalue	padj
Onecut2	341.547	2.29876	0.16649	13.8072	2.30653e-43	3.30231e-40
Pou4f1	92.9217	6.01335	0.58541	10.272	9.42046e-25	2.68174e-22
Sfmbt2	219.949	1.60114	0.161422	9.919	3.44174e-23	7.63437e-21
Twist1	135.317	3.61758	0.374845	9.65086	4.87474e-22	8.92701e-20
Arxes1	991.779	0.704323	0.075724	9.30119	1.38888e-20	2.27849e-18
Fhl1	3969.78	0.585951	0.0643685	9.10308	8.78055e-20	1.33014e-17
Ece2	1473.2	0.86294	0.0954907	9.03691	1.61169e-19	2.3173e-17
Gprasp1	22307.6	0.570877	0.0631749	9.03644	1.61853e-19	2.3173e-17
Pax2	244.629	3.20882	0.356688	8.99614	2.33792e-19	3.25437e-17
Lgals8	1461.05	0.623005	0.0718077	8.67601	4.09882e-18	4.96557e-16
Gprasp2	5176.75	0.857622	0.100237	8.55592	1.16929e-17	1.35406e-15
Rimklb	1396.29	0.802831	0.0944725	8.49804	1.92825e-17	2.13859e-15
Usp11	4260.93	0.647269	0.0775526	8.34619	7.04986e-17	7.25675e-15
Asl	496.412	0.937652	0.112722	8.3183	8.92359e-17	9.12582e-15
Tal1	253.818	2.46591	0.297067	8.30085	1.0337e-16	1.05031e-14
Cbx4	2564.35	0.639336	0.0770496	8.29772	1.06127e-16	1.0714e-14
Rgs13	42.3954	2.73691	0.340586	8.03587	9.29136e-16	8.40975e-14
Slc29a4	905.89	1.12398	0.14236	7.89535	2.89502e-15	2.4252e-13
Cidea	175.169	1.66646	0.211387	7.88344	3.18491e-15	2.63995e-13
Emid1	298.866	1.12759	0.145632	7.74276	9.72813e-15	7.6223e-13
Ebf4	268.414	1.1665	0.150883	7.73114	1.06588e-14	8.26925e-13
Slc6a15	3629.15	0.697034	0.0907511	7.68072	1.58196e-14	1.19207e-12
Pnck	1906.64	1.07347	0.140124	7.66088	1.8467e-14	1.37187e-12
Gdi1	25402.3	0.395025	0.0526601	7.50141	6.31334e-14	4.21308e-12
En2	3322.35	2.76399	0.368639	7.4978	6.4898e-14	4.31257e-12
Optn	934.65	0.564532	0.0758725	7.44053	1.00283e-13	6.44633e-12
Ndn	5140.37	0.489649	0.0665965	7.35247	1.94574e-13	1.2017e-11
Angpt1	668.105	0.888067	0.120976	7.34089	2.12185e-13	1.28527e-11
Zfp503	215.233	1.58926	0.217293	7.31391	2.5948e-13	1.55975e-11
Pnma3	708.797	0.904757	0.125746	7.19511	6.2412e-13	3.60046e-11
Gap43	8247.28	0.512007	0.0728839	7.02496	2.14131e-12	1.15491e-10
Cdh18	1595.97	0.505522	0.0724819	6.97446	3.07038e-12	1.56998e-10
Tubb2a	9631.49	0.527637	0.076291	6.91611	4.64221e-12	2.32491e-10
Igsf10	428.283	1.07069	0.154901	6.91214	4.77402e-12	2.3793e-10
Tspyl2	3651.16	0.43463	0.0630281	6.89582	5.35531e-12	2.64471e-10
Ash2l	1740.65	0.441055	0.0639952	6.892	5.50133e-12	2.70751e-10
Klhl4	1281.39	0.521139	0.0759914	6.85786	6.98983e-12	3.37678e-10
Zcchc18	10472.8	0.509389	0.0753362	6.76154	1.36532e-11	6.41863e-10
Acot7	7735.06	0.436658	0.0651882	6.69843	2.10675e-11	9.56553e-10
Nrip2	663.456	0.742401	0.112157	6.61931	3.60867e-11	1.60093e-09
Crnde	51.1931	2.52446	0.384517	6.56527	5.19381e-11	2.22881e-09
Dync1i1	5399.54	0.35201	0.0539589	6.52367	6.86065e-11	2.89674e-09
Zscan18	683.224	0.556576	0.0853369	6.5221	6.93298e-11	2.91945e-09
Samd14	3208.21	0.661122	0.101818	6.4932	8.40317e-11	3.45539e-09
Pafah1b3	399.704	0.817248	0.126957	6.43719	1.21707e-10	4.82812e-09
Morf4l2	7545.36	0.391636	0.0608568	6.43537	1.23169e-10	4.86163e-09
Gpr85	1993.66	0.415047	0.064607	6.42417	1.32589e-10	5.22035e-09
Ccdc39	532.647	0.57007	0.0890409	6.40234	1.53011e-10	5.96477e-09
Dgka	475.919	0.717767	0.112299	6.39156	1.64199e-10	6.38511e-09
Arl10	433.495	0.763776	0.119931	6.36843	1.90968e-10	7.29989e-09
Smc4	544.715	0.667383	0.105929	6.30029	2.97085e-10	1.11666e-08
Ahi1	6375.92	0.731473	0.116552	6.27592	3.47566e-10	1.29099e-08
Tfap2a	296.638	2.06559	0.331827	6.22492	4.81807e-10	1.74838e-08
Tbkbp1	2237.81	0.489198	0.0791197	6.18301	6.28902e-10	2.25617e-08
Csf2ra	719.217	0.873862	0.141763	6.16424	7.08221e-10	2.51778e-08
Bex1	1734.45	0.590127	0.0962294	6.1325	8.65106e-10	3.02097e-08
Ucma	93.8675	2.48785	0.407532	6.10468	1.03008e-09	3.53436e-08
Maged1	16403.9	0.275507	0.0452023	6.09499	1.09443e-09	3.73078e-08
Psme1	979.793	0.698055	0.115118	6.06384	1.32908e-09	4.47257e-08
A930017M01Rik	510.773	0.883868	0.145854	6.05994	1.36174e-09	4.57273e-08
Scaper	2096.67	0.359878	0.0595789	6.04036	1.53775e-09	5.1201e-08
Rab9b	1623.44	0.639575	0.106699	5.99421	2.04471e-09	6.68094e-08
Col5a3	214.947	1.30276	0.218836	5.95312	2.63078e-09	8.37014e-08
Ctxn2	206.917	1.08441	0.18287	5.92998	3.02966e-09	9.56195e-08
Skor1	319.801	1.99317	0.337337	5.90856	3.45117e-09	1.08488e-07
Dpysl5	1229.31	0.669763	0.113687	5.89131	3.83136e-09	1.19249e-07
Anapc5	6560.29	0.293459	0.0499073	5.88009	4.10051e-09	1.26874e-07
Gspt2	1053.91	0.58414	0.0994648	5.87284	4.28403e-09	1.32292e-07
Wdr6	5270.08	0.620171	0.10563	5.87116	4.3276e-09	1.33376e-07
Skap2	465.717	0.646202	0.110882	5.82785	5.61467e-09	1.69397e-07
Arxes2	1743.81	0.502072	0.0861459	5.82816	5.6041e-09	1.69397e-07
2210013O21Rik	871.423	0.676082	0.11816	5.72175	1.05432e-08	3.04671e-07
Srsf5	6858.7	0.441562	0.0773538	5.70834	1.14082e-08	3.2786e-07
Hsp90aa1	33596	0.368689	0.0649701	5.67475	1.38892e-08	3.91307e-07
Eef1a1	58806.1	0.315653	0.0556775	5.6693	1.43382e-08	4.02518e-07
Rab34	471.974	0.679552	0.120434	5.64253	1.67566e-08	4.58159e-07
Tmem117	445.893	0.668958	0.118726	5.63446	1.75611e-08	4.79322e-07
Kptn	607.918	0.600859	0.107006	5.61519	1.96348e-08	5.3041e-07
Rian	19917.4	0.440759	0.079153	5.56845	2.57019e-08	6.79159e-07
Wsb1	3152.4	0.637579	0.11501	5.54367	2.962e-08	7.69777e-07
Ranbp17	358.824	0.791525	0.142895	5.53921	3.03845e-08	7.88344e-07
Fkbp14	585.261	0.58105	0.105151	5.52587	3.2786e-08	8.4647e-07
Smarca1	1243.64	0.433774	0.0786581	5.51468	3.49423e-08	8.97727e-07
Faf1	1707.92	0.315778	0.0572732	5.51353	3.51698e-08	9.02099e-07
Eif2s3y	1345.82	0.596223	0.108233	5.50871	3.61471e-08	9.24157e-07
Srsf12	876.742	0.510089	0.0933922	5.4618	4.71344e-08	1.17828e-06
Trmt2b	964.939	0.458826	0.0843912	5.43689	5.4218e-08	1.33837e-06
Scn9a	64.5258	2.01669	0.372893	5.40822	6.36557e-08	1.55491e-06
Klhl1	302.908	1.24282	0.229898	5.40596	6.44633e-08	1.57157e-06
Prmt2	1553.76	0.425687	0.078773	5.40397	6.51824e-08	1.58419e-06
Tmem35	2664.17	0.34641	0.0642419	5.39227	6.95724e-08	1.68051e-06
Sox3	55.5752	1.39696	0.259638	5.38042	7.43111e-08	1.78949e-06
Hsp90ab1	52016.8	0.326401	0.0607077	5.3766	7.59038e-08	1.82505e-06
Polr2a	4517.68	0.381331	0.0711399	5.36031	8.30816e-08	1.97651e-06
Hsdl1	1993.19	0.322287	0.0602884	5.34575	9.00421e-08	2.13244e-06
Cct3	4109.98	0.339189	0.0635745	5.33529	9.53904e-08	2.25571e-06
Fus	8654.47	0.433691	0.0813711	5.32979	9.83272e-08	2.3182e-06
Grb10	2085.72	0.618079	0.116574	5.30203	1.14519e-07	2.64452e-06
E130008D07Rik	73.6977	1.35634	0.255881	5.30066	1.15383e-07	2.66056e-06
Cd200	4003.85	0.615987	0.116676	5.27949	1.29544e-07	2.93975e-06
Rdx	5011.17	0.256066	0.0490815	5.21716	1.81685e-07	3.98518e-06
Dpysl3	2032.11	0.736847	0.141288	5.21523	1.83593e-07	4.01585e-06
Zfp28	412.038	0.589233	0.113028	5.21318	1.85632e-07	4.05481e-06
Cgn	315.252	0.693993	0.134067	5.17647	2.26121e-07	4.85175e-06
4930506M07Rik	1256.2	0.53823	0.104167	5.16701	2.37863e-07	5.07603e-06
Apeh	923.605	0.581113	0.112573	5.1621	2.44198e-07	5.19011e-06
Sncaip	290.827	0.718752	0.139995	5.13412	2.83472e-07	5.95254e-06
Grb14	815.969	0.558501	0.108818	5.13244	2.8601e-07	5.99784e-06
Elac1	1907.96	0.340259	0.0664005	5.12435	2.98566e-07	6.22797e-06
Stil	122.696	1.40484	0.274576	5.11638	3.11463e-07	6.47982e-06
Sat2	300.66	0.814691	0.159573	5.10544	3.30021e-07	6.8194e-06
2022-03-07	2301.23	0.345645	0.0677039	5.10524	3.30383e-07	6.8194e-06
Mmab	951.31	0.496856	0.0974927	5.09634	3.46284e-07	7.13826e-06
Firre	2869.19	0.682691	0.134002	5.09464	3.49408e-07	7.19323e-06
Macrod1	475.454	0.759699	0.149182	5.09243	3.53512e-07	7.26823e-06
Zmat1	649	0.392474	0.0773915	5.07128	3.95151e-07	8.02969e-06
Cntn6	2073.25	0.524861	0.103649	5.06383	4.10917e-07	8.32887e-06
Rem2	248.884	1.21314	0.239693	5.06123	4.1655e-07	8.4322e-06
Mfsd10	574.491	0.560953	0.111034	5.05208	4.37033e-07	8.82415e-06
Sec24d	480.431	0.588872	0.116567	5.0518	4.37663e-07	8.82555e-06
Ache	1913.89	0.622331	0.123238	5.04984	4.42176e-07	8.90516e-06
Rsrp1	6085.75	0.53559	0.10635	5.0361	4.75109e-07	9.53184e-06
Prps1l3	971.143	0.438292	0.0872237	5.02492	5.03644e-07	1.0015e-05
Cgref1	480.891	0.878111	0.17542	5.00577	5.56395e-07	1.0926e-05
Nfya	1074.35	0.572881	0.114582	4.99975	5.74044e-07	1.12306e-05
Shox2	52.6511	7.35165	1.47257	4.99239	5.96366e-07	1.16384e-05
Wdr41	1516.49	0.316149	0.0633348	4.9917	5.98493e-07	1.16654e-05
Mctp1	3204.1	0.376334	0.075413	4.99031	6.02835e-07	1.17355e-05
Nt5e	344.112	0.762892	0.152923	4.98875	6.07719e-07	1.18014e-05
Ctxn3	733.188	1.12193	0.225059	4.98504	6.19493e-07	1.20005e-05
B930025P03Rik	20.3154	2.12549	0.42646	4.98403	6.2272e-07	1.20482e-05
Stat6	490.033	0.533892	0.107294	4.97596	6.49254e-07	1.24849e-05
Ninj1	442.963	0.618995	0.124465	4.97326	6.58378e-07	1.26449e-05
Irx5	120.197	2.58939	0.521021	4.96983	6.7011e-07	1.28233e-05
Srsf2	4727.94	0.331163	0.0667672	4.95997	7.05048e-07	1.34104e-05
Bbs2	926.437	0.367559	0.0744798	4.93501	8.01454e-07	1.51163e-05
Rragb	3090.38	0.354071	0.0718728	4.92635	8.37807e-07	1.56892e-05
Zfp157	1156.6	0.35692	0.0732874	4.87015	1.11516e-06	2.05411e-05
Podxl2	6364	0.346154	0.071158	4.86459	1.14697e-06	2.10532e-05
Cdc45	94.9478	1.18846	0.244764	4.85552	1.2007e-06	2.19371e-05
Rit2	4438.34	0.505255	0.104198	4.84899	1.24094e-06	2.26199e-05
Aldh1b1	177.662	0.739427	0.15292	4.83539	1.32884e-06	2.41105e-05
Cd99l2	4020.17	0.309163	0.0639447	4.83485	1.33244e-06	2.41479e-05
Hsd17b11	1384.75	0.380531	0.0787679	4.83104	1.3582e-06	2.45021e-05
Armcx4	3269.64	0.311701	0.0646265	4.82311	1.41336e-06	2.54388e-05
Cdh15	1084.38	1.01627	0.210764	4.82183	1.4225e-06	2.55741e-05
Prr13	1728.27	0.333349	0.0692641	4.81272	1.48887e-06	2.6676e-05
Tuft1	201.368	0.906718	0.188492	4.81037	1.50654e-06	2.69619e-05
Samhd1	753.232	0.425896	0.088631	4.80528	1.54539e-06	2.75632e-05
Msto1	612.722	0.50965	0.10684	4.77023	1.84015e-06	3.21648e-05
Tspyl3	1029.05	0.388927	0.0816039	4.76603	1.87892e-06	3.27697e-05
Rhou	1882.01	0.334917	0.0709271	4.722	2.33541e-06	3.9634e-05
Gkap1	661.473	0.520652	0.110348	4.71829	2.37835e-06	4.03193e-05
Otogl	25.0402	1.81202	0.384159	4.71684	2.39531e-06	4.05631e-05
Gpi1	16327.3	0.311691	0.0661384	4.71271	2.44447e-06	4.12228e-05
Stk3	916.042	0.446346	0.0947764	4.70947	2.48364e-06	4.17002e-05
Orc3	2398.7	0.298472	0.0635447	4.69705	2.63947e-06	4.40816e-05
Cyb5r1	738.722	0.554775	0.11827	4.69077	2.7218e-06	4.52646e-05
Ppp1r14c	723.483	0.380842	0.0812787	4.68563	2.79094e-06	4.6074e-05
Prss16	60.0467	1.32834	0.28395	4.67806	2.89602e-06	4.75594e-05
Acadvl	1718.17	0.335272	0.0717313	4.67399	2.954e-06	4.831e-05
Dus2	416.739	0.470832	0.101328	4.64663	3.37401e-06	5.47155e-05
Hs6st2	2206.79	0.518701	0.111634	4.64645	3.37694e-06	5.47155e-05
Taok3	2842.88	0.407293	0.0879021	4.63349	3.59557e-06	5.81382e-05
Rnf25	1182.76	0.31207	0.0676385	4.61379	3.95388e-06	6.32822e-05
Bex4	581.209	0.777363	0.168527	4.61269	3.97496e-06	6.35549e-05
Tmem43	1337.26	0.340095	0.0739355	4.59989	4.22715e-06	6.73138e-05
Maoa	2169.64	0.413973	0.0902817	4.58535	4.5323e-06	7.1594e-05
Nagk	815.672	0.476369	0.103948	4.58276	4.58872e-06	7.21956e-05
Uckl1	744.761	0.432219	0.0945642	4.57064	4.86228e-06	7.63469e-05
Cct5	5051.32	0.255025	0.0558376	4.56726	4.94135e-06	7.74342e-05
Dbndd1	565.094	0.418544	0.0918058	4.55902	5.13932e-06	8.01377e-05
Nfyc	1441.57	0.478965	0.105087	4.5578	5.16915e-06	8.05233e-05
Tmem130	5551.65	0.601128	0.13191	4.55711	5.18633e-06	8.07109e-05
Cenpc1	1210.6	0.356141	0.0782093	4.5537	5.27115e-06	8.18692e-05
Adam15	3067.66	0.297103	0.0652528	4.55311	5.28575e-06	8.2015e-05
Dpp7	653.678	0.391335	0.0859908	4.55089	5.34187e-06	8.27228e-05
Marcks	11943.6	0.529217	0.116393	4.54679	5.44698e-06	8.4185e-05
Mid2	1990.07	0.296103	0.0651511	4.54487	5.49698e-06	8.47913e-05
C230004F18Rik	327.04	0.459549	0.10141	4.53159	5.85423e-06	8.95999e-05
Coro1c	3916.78	0.31999	0.0706662	4.52819	5.9492e-06	9.07887e-05
Nrbp1	2992.97	0.277485	0.0613322	4.5243	6.05948e-06	9.20258e-05
Creb3l3	20.6806	1.89176	0.420023	4.50394	6.6706e-06	0.000100435
Dlx4	39.2453	2.12183	0.471475	4.5004	6.78255e-06	0.000102023
Parp12	524.001	0.454405	0.101107	4.49429	6.98021e-06	0.000104597
Rrm2b	2274.46	0.389833	0.0867459	4.49396	6.9911e-06	0.00010466
Dnajc12	598.432	0.478195	0.106629	4.48467	7.30252e-06	0.000108703
AF357359	790.244	0.435093	0.0970676	4.48237	7.38175e-06	0.000109675
Tmem255a	2783.56	0.749331	0.168367	4.45058	8.56398e-06	0.000124999
Vbp1	2919.49	0.419248	0.0947832	4.42323	9.72365e-06	0.000140236
Rspo3	525.167	0.520004	0.117963	4.40821	1.0423e-05	0.000149637
Gaa	9291.44	0.386342	0.0877816	4.40117	1.07669e-05	0.000154292
Serpina3n	403.692	0.923138	0.210109	4.39361	1.11484e-05	0.000158893
Suv39h1	1089.88	0.379011	0.0864735	4.38298	1.17068e-05	0.00016595
Pgrmc1	9014.42	0.406961	0.0929465	4.37844	1.19531e-05	0.000168985
Haus4	133.312	0.912008	0.208943	4.36485	1.27208e-05	0.000178874
Syngr3	4806.1	0.301411	0.0694253	4.34151	1.41506e-05	0.000196825
Ggact	1029.4	0.54331	0.125221	4.33881	1.43259e-05	0.000198959
Tpx2	127.71	0.968405	0.223261	4.33754	1.44085e-05	0.000199928
Maged2	1515.07	0.39691	0.0915548	4.33522	1.45614e-05	0.000201695
Rab27a	417.337	0.470217	0.108646	4.32798	1.50484e-05	0.00020771
Dlx2	196.173	0.973174	0.225675	4.31229	1.61574e-05	0.000221465
Fam219b	777.577	0.336401	0.0785706	4.28152	1.85621e-05	0.000251362
Lta4h	1452.09	0.311805	0.0728757	4.27858	1.88086e-05	0.000254263
Prdm8	1981.92	0.460154	0.107684	4.27318	1.92702e-05	0.00025939
E130309F12Rik	322.771	0.908963	0.212915	4.26913	1.96234e-05	0.000263694
Prim1	292.938	0.656309	0.153843	4.26608	1.98934e-05	0.000266639
Izumo4	661.156	0.554088	0.129927	4.2646	2.00262e-05	0.000268191
Ahsa2	1152.08	0.443414	0.104092	4.25981	2.046e-05	0.000273535
Tceal3	3278.05	0.498277	0.117091	4.25547	2.08608e-05	0.000277715
Cbx8	395.523	0.553392	0.130155	4.25179	2.12071e-05	0.000281849
Terf2ip	2656.02	0.27056	0.063654	4.25048	2.13311e-05	0.000283019
Cox20	549.323	0.43118	0.101805	4.23536	2.28186e-05	0.00030098
Mri1	380.194	0.496028	0.117178	4.23312	2.30474e-05	0.000303743
Tcp11l2	1703.06	0.338787	0.0800667	4.23131	2.32333e-05	0.000305602
Pabpn1	4970.69	0.356558	0.0842692	4.23118	2.32467e-05	0.000305602
Dmrt2	38.9282	1.40918	0.33316	4.22975	2.33947e-05	0.00030678
Mapk3	4879.47	0.446152	0.105476	4.22989	2.33809e-05	0.00030678
Ttc28	1261.83	0.333106	0.078832	4.22552	2.38386e-05	0.000311564
Tia1	2948.15	0.375896	0.0889684	4.22505	2.38884e-05	0.000311956
Fchsd1	223.442	0.552211	0.130799	4.22182	2.42343e-05	0.000315687
Inpp5f	6371.15	0.270641	0.0641201	4.22085	2.43388e-05	0.000316525
Chl1	11517.7	0.361278	0.0856208	4.21951	2.44833e-05	0.000318141
Stk33	35.8638	1.47428	0.349584	4.21724	2.47309e-05	0.000320829
9930104L06Rik	744.681	0.325437	0.0772531	4.21261	2.52441e-05	0.000326949
Mlh3	1309.82	0.273779	0.0651223	4.20407	2.6216e-05	0.000337869
Stat4	69.2538	0.886613	0.21123	4.19737	2.70027e-05	0.000346308
Rnf2	1633.03	0.359846	0.0857308	4.1974	2.7e-05	0.000346308
Acaa1a	1285.1	0.307768	0.0734359	4.19097	2.77766e-05	0.000355653
Tuba1a	23131.5	0.33042	0.0788574	4.1901	2.78829e-05	0.000356724
Telo2	751.39	0.437005	0.104332	4.1886	2.80682e-05	0.000358512
Phf1	1524.44	0.378755	0.0906495	4.17824	2.93773e-05	0.000374323
St7	636.588	0.457642	0.109613	4.17507	2.97891e-05	0.000378651
Prpsap1	1433.9	0.273656	0.0656161	4.17055	3.03862e-05	0.000384998
Myef2	3097.69	0.344071	0.082564	4.16733	3.08194e-05	0.000390173
Trpc4	422.72	0.473484	0.113692	4.16463	3.11864e-05	0.000394185
Vwa3a	205.398	0.875035	0.21025	4.16187	3.15652e-05	0.000398334
Zfp955a	428.78	0.473504	0.11388	4.15792	3.21163e-05	0.000404063
Polr3gl	761.123	0.354346	0.0852621	4.15596	3.23923e-05	0.000406816
Fpgs	224.613	0.526403	0.12671	4.1544	3.26147e-05	0.000408956
Hdac1	959.977	0.3154	0.0759831	4.15092	3.31142e-05	0.000413245
Cwf19l2	850.905	0.370867	0.089621	4.13818	3.50077e-05	0.00043276
Vasp	679.241	0.368307	0.0891009	4.1336	3.57123e-05	0.000440778
Tro	5443.39	0.318216	0.077097	4.12747	3.6678e-05	0.00045093
Hcn3	535.114	0.577199	0.139901	4.12576	3.69514e-05	0.000453583
Abca8a	297.348	0.598531	0.145163	4.12315	3.73723e-05	0.000458035
Nelfb	2078.02	0.318093	0.0772442	4.11802	3.82138e-05	0.000467259
Zfp229	321.054	0.648494	0.157517	4.11699	3.83852e-05	0.000468627
Sim1	4.48056	6.14978	1.49632	4.10994	3.9576e-05	0.000480187
Hoxd8	5.80973	5.68015	1.38195	4.11024	3.9524e-05	0.000480187
Celf6	572.335	0.446493	0.10867	4.10872	3.97861e-05	0.000482365
Gpn3	663.198	0.454653	0.110684	4.10766	3.99688e-05	0.000484207
Hdac2	3511.25	0.258774	0.0630391	4.10498	4.04351e-05	0.000489103
Tppp3	1209.21	0.545406	0.132892	4.10412	4.05848e-05	0.000490538
4732491K20Rik	192.007	0.689805	0.168157	4.10216	4.09308e-05	0.000493961
A730090H04Rik	72.3901	1.7171	0.419996	4.08837	4.34422e-05	0.000520678
Nnmt	18.648	1.81019	0.44376	4.0792	4.5191e-05	0.000539586
Mesdc2	1757.38	0.268609	0.066033	4.0678	4.74588e-05	0.000563672
Riok1	533.551	0.387179	0.095237	4.06543	4.79444e-05	0.000568581
Sparc	18229	0.510075	0.125586	4.06157	4.87441e-05	0.000577631
Metap1d	494.687	0.43216	0.106445	4.05994	4.90851e-05	0.000581234
Mast1	4597.23	0.32464	0.0799927	4.05838	4.94154e-05	0.000584705
Lyrm9	1710.41	0.301426	0.0742987	4.05695	4.97171e-05	0.000587833
Mum1l1	179.529	0.819973	0.202888	4.04151	5.31089e-05	0.000623722
Kiz	659.934	0.378849	0.0938081	4.03855	5.37815e-05	0.000630212
Prdx3	2215.94	0.322522	0.0802827	4.01733	5.88612e-05	0.000685148
Aifm2	285.208	0.46251	0.115192	4.01512	5.94164e-05	0.00069008
Naa16	451.332	0.450184	0.11214	4.01448	5.95758e-05	0.000691422
Hspa8	46158.7	0.35184	0.0877615	4.00905	6.09635e-05	0.000705966
Ckap4	1457.57	0.291016	0.0726215	4.0073	6.14159e-05	0.000710161
Zwint	12422	0.407869	0.101902	4.00256	6.26607e-05	0.000721166
Lin28b	112.68	0.846125	0.211528	4.00006	6.33252e-05	0.000727432
2610008E11Rik	1415.94	0.390296	0.0976386	3.99735	6.40554e-05	0.000735283
Sgsh	354.484	0.442308	0.110731	3.99442	6.48517e-05	0.00074334
Ccndbp1	2700.58	0.323983	0.0811681	3.99151	6.56536e-05	0.000750347
Tmie	171.859	0.626979	0.157214	3.98805	6.66175e-05	0.00076026
Khnyn	1476.99	0.455959	0.114568	3.97982	6.89678e-05	0.00078311
Slc35f1	3336.01	0.35212	0.0885386	3.97703	6.97826e-05	0.000790159
Glt8d1	896.733	0.401229	0.100993	3.97284	7.102e-05	0.00080064
Prune2	8117.64	0.356374	0.0897707	3.96982	7.19259e-05	0.000808538
Slc1a6	3227.15	0.41909	0.105657	3.96652	7.29286e-05	0.000818057
Agpat4	1329.67	0.293596	0.0742515	3.95408	7.68301e-05	0.000858154
Mettl20	84.21	0.789351	0.199767	3.95136	7.77068e-05	0.000866104
Echdc2	489.369	0.616487	0.15618	3.94729	7.90417e-05	0.000877875
Cct2	5110.37	0.255111	0.0647064	3.94259	8.06069e-05	0.000894628
Hexim2	366.194	0.421492	0.106913	3.9424	8.06715e-05	0.000894715
C1qtnf2	42.8296	1.25979	0.319634	3.94136	8.10215e-05	0.000897965
Pcnxl4	1879.8	0.272228	0.0691164	3.93868	8.19296e-05	0.000906753
Chrnb2	3373.85	0.276191	0.0703783	3.92438	8.69521e-05	0.00095897
Lbx1	55.6533	5.08282	1.29696	3.91902	8.89101e-05	0.000978508
Paf1	2012.22	0.298419	0.0762553	3.91342	9.09966e-05	0.00100007
Slc25a38	811.092	0.395914	0.101261	3.90984	9.23589e-05	0.00101363
Abcb10	1410.43	0.366647	0.0938632	3.90618	9.37656e-05	0.00102692
Sync	53.7276	1.17857	0.302347	3.89808	9.6958e-05	0.00105821
Zfp90	539.186	0.401044	0.102888	3.89786	9.70462e-05	0.00105844
Tcaim	885.692	0.317901	0.0817014	3.89101	9.98279e-05	0.00108577
Prkra	688.37	0.388663	0.0999203	3.88973	0.000100355	0.00109075
Antxr2	122.935	0.653502	0.168528	3.8777	0.000105448	0.00113981
Sharpin	1062.63	0.271743	0.0701263	3.87505	0.000106605	0.00115073
Dclk2	2784.8	0.366618	0.0947184	3.87061	0.000108565	0.00116869
Tatdn3	369.564	0.444204	0.114928	3.86507	0.000111056	0.00119384
Vdac3	3748.88	0.319964	0.082927	3.85839	0.000114137	0.00122449
Setd6	353.957	0.432973	0.11228	3.8562	0.000115164	0.00123383
Fuz	455.269	0.438214	0.113699	3.85417	0.000116124	0.00124157
1110002L01Rik	570.248	0.335512	0.087098	3.85212	0.000117099	0.0012503
Bcap31	2494.02	0.256775	0.0667429	3.84723	0.00011946	0.00127378
Aloxe3	221.028	0.872293	0.226784	3.84635	0.00011989	0.0012775
Chtf18	74.1056	0.930291	0.242036	3.84361	0.000121239	0.00128926
Zfp383	685.863	0.375553	0.0977242	3.84299	0.000121543	0.00129162
Mfsd7b	688.321	0.335691	0.0874771	3.83748	0.000124305	0.00131742
Zfp3	476.38	0.40293	0.104998	3.83751	0.000124286	0.00131742
Sfrp5	75.0574	1.78085	0.464119	3.83706	0.000124517	0.00131878
Mtbp	120.831	0.74108	0.193491	3.83005	0.000128119	0.00135419
Hook2	403.233	0.431106	0.112715	3.82474	0.000130912	0.00137909
2610203C20Rik	866.868	0.542349	0.141884	3.82248	0.000132117	0.00138992
Ascc1	564.277	0.338627	0.0886742	3.81877	0.000134117	0.00140813
Atic	1041.09	0.291965	0.0765997	3.81157	0.000138089	0.00144406
Ccdc112	437.791	0.487118	0.127859	3.80981	0.000139072	0.00145242
Trpv2	741.762	0.425881	0.111793	3.80956	0.000139212	0.00145292
Elp4	991.395	0.273071	0.0716852	3.80931	0.000139355	0.00145345
Gtf3c6	569.589	0.323702	0.0851764	3.80037	0.000144478	0.00149893
Atat1	1508.42	0.340783	0.0898053	3.79469	0.000147831	0.00152969
Ilk	2849.77	0.312709	0.0825375	3.78869	0.000151442	0.00156398
Ccdc126	519.497	0.418035	0.110562	3.78101	0.000156193	0.00160567
Dock9	8402.22	0.36128	0.0955893	3.77951	0.000157139	0.00161434
Cep57	745.864	0.385869	0.102251	3.77376	0.000160805	0.00164878
Txnrd3	209.602	0.618917	0.164137	3.77074	0.000162767	0.0016678
Pm20d2	653.437	0.372808	0.0989147	3.76899	0.000163913	0.00167845
Tfr2	194.714	0.751753	0.199481	3.76855	0.000164201	0.00168031
B230118H07Rik	997.1	0.434133	0.115329	3.76431	0.00016701	0.00170684
Magel2	58.5986	1.61614	0.429567	3.76226	0.000168384	0.00171639
Top1mt	404.141	0.379057	0.100803	3.76039	0.000169648	0.00172596
Strip1	3215.22	0.250357	0.0666598	3.75574	0.000172827	0.00175603
Lhfpl5	105.399	0.822115	0.219107	3.75211	0.000175351	0.00178053
Zfp711	655.208	0.335459	0.0894733	3.74927	0.000177352	0.00179968
Sdr42e1	221.754	0.460748	0.122925	3.7482	0.000178109	0.00180388
Rmdn2	310.469	0.425822	0.113653	3.74669	0.000179185	0.00181333
Ngfrap1	4024.76	0.345029	0.0921495	3.74424	0.000180944	0.00182907
2610035D17Rik	550.99	0.421906	0.112725	3.74278	0.000181996	0.00183734
Cog5	1232.58	0.304933	0.0816102	3.73646	0.00018663	0.0018793
Fbxw17	251.2	0.4653	0.124581	3.73493	0.000187767	0.00188835
Mtss1	5864.42	0.407565	0.10919	3.73263	0.000189487	0.001902
Ccar1	2913.88	0.403453	0.108109	3.7319	0.000190044	0.00190516
Arrdc1	265.756	0.58067	0.155841	3.72604	0.000194513	0.001945
3632454L22Rik	232.556	0.761078	0.204375	3.72392	0.000196151	0.00195766
Cep120	3441.46	0.252644	0.0678782	3.72203	0.000197631	0.00196868
Rsph9	223.52	0.694068	0.186614	3.71928	0.000199792	0.00198519
Swt1	491.85	0.437465	0.117695	3.71695	0.000201643	0.00200105
Dis3	764.003	0.341811	0.0919691	3.71658	0.000201936	0.0020027
Psme2	672.233	0.392096	0.105603	3.71293	0.00020487	0.00202924
Pcdh11x	880.017	0.823167	0.221864	3.71024	0.000207064	0.00204711
Lats2	2389.85	0.345901	0.0933573	3.70514	0.000211276	0.00208353
H13	2743.83	0.338625	0.0914258	3.70383	0.000212372	0.00209302
Stmn2	18630.6	0.359465	0.0972146	3.69764	0.000217609	0.00214062
Hmgn5	606.499	0.400503	0.108348	3.69644	0.000218646	0.00214948
Atad3a	1297.95	0.270306	0.0731595	3.69475	0.000220106	0.00216113
Cnpy4	410.116	0.380498	0.103124	3.6897	0.000224518	0.00219623
2700069I18Rik	17.2084	1.58908	0.430862	3.68814	0.0002259	0.00220291
Zfp273	310.576	0.428132	0.116098	3.68767	0.000226318	0.00220562
Barx1	29.2148	9.11343	2.47415	3.68346	0.000230086	0.00223819
Upf3b	1151.86	0.301647	0.0819658	3.68015	0.000233093	0.00226325
Med12	1922.82	0.417215	0.113383	3.6797	0.000233506	0.00226585
Slc26a11	242.865	0.571018	0.155295	3.67699	0.000236003	0.00228586
Cyp4v3	510.935	0.388358	0.105655	3.67572	0.000237183	0.00229588
Frmd3	375.894	0.442526	0.120503	3.67231	0.000240371	0.00232463
Zfp92	110.535	1.00326	0.273212	3.67208	0.000240588	0.00232463
Paqr6	497.199	0.585994	0.159744	3.66833	0.000244139	0.00235742
Nmbr	35.6515	1.21566	0.331478	3.6674	0.000245031	0.00236313
Scfd1	1526.09	0.279667	0.0763749	3.66177	0.000250479	0.00240683
Lhx9	178.11	2.23629	0.612079	3.65359	0.0002586	0.0024773
Zc4h2	1066.87	0.309139	0.0846678	3.6512	0.000261015	0.00249741
Hmgn3	1383.89	0.3499	0.0958543	3.65033	0.000261905	0.00250439
Myl6b	543.026	0.576138	0.158327	3.63891	0.000273795	0.00260544
Nap1l5	17281.6	0.37948	0.104343	3.63686	0.000275979	0.00262147
Snx4	1804.91	0.291522	0.0803943	3.62616	0.000287669	0.00271287
Slc38a7	1094.35	0.258115	0.0713442	3.61788	0.000297021	0.00279437
Cyp27a1	305.96	0.613767	0.169699	3.61679	0.000298276	0.00280284
En1	110.549	3.93345	1.08807	3.61507	0.000300263	0.00281647
Pcdhgb6	883.269	0.436039	0.120623	3.6149	0.000300461	0.00281664
Fam3a	704.447	0.375994	0.104216	3.60783	0.000308768	0.00288422
Zfp712	473.129	0.353749	0.0980785	3.60679	0.00031001	0.00289068
Tmem150a	256.865	0.458303	0.127083	3.60633	0.000310554	0.00289404
Ralgps2	2151.96	0.293343	0.0813482	3.60602	0.000310931	0.00289583
Qpct	327.492	0.825369	0.229005	3.60416	0.000313168	0.00291494
Ccbl1	515.001	0.383271	0.106392	3.60245	0.000315235	0.00293072
Pcbd1	146.155	0.815384	0.226493	3.60003	0.000318175	0.00295282
Prph	31.7287	1.87708	0.521761	3.59759	0.000321183	0.00297373
Rab37	452.402	0.862291	0.239748	3.59666	0.000322327	0.00298116
Clrn1	30.0581	1.65989	0.461918	3.59346	0.000326311	0.00301412
Cpne6	3502.45	0.584902	0.162956	3.58933	0.000331526	0.00305577
Pofut1	1068.74	0.271506	0.0756435	3.58928	0.000331597	0.00305577
Cpt1c	2971.28	0.296048	0.082507	3.58815	0.00033303	0.0030636
Atg16l2	514.905	0.47967	0.133728	3.5869	0.00033463	0.00307652
Gm16702	122.559	0.769571	0.214651	3.58522	0.000336798	0.00309465
Stag1	2681.25	0.255602	0.0713172	3.58402	0.000338349	0.00310709
Srsf1	8368.89	0.271497	0.0759105	3.57654	0.000348172	0.00318985
Irx2	179.147	6.02183	1.68406	3.57578	0.000349186	0.00319729
Ppox	654.337	0.420788	0.117735	3.57403	0.000351531	0.00321315
Xlr3a	34.6601	1.72366	0.482411	3.57302	0.000352885	0.00322366
Nap1l3	2852.64	0.25784	0.0721885	3.57176	0.000354585	0.00323169
Rapgef6	1862.11	0.381988	0.107115	3.56615	0.000362264	0.00328646
Thap3	331.052	0.477104	0.134209	3.55494	0.000378067	0.00341605
Cnot10	1797.07	0.298432	0.0839779	3.5537	0.000379857	0.00343026
Ccdc142	320.219	0.499184	0.140612	3.55009	0.0003851	0.00347561
Cd109	68.1387	0.96801	0.272689	3.54987	0.000385417	0.00347648
Srsf6	3957.61	0.254345	0.0717646	3.54416	0.000393867	0.00354255
4930447C04Rik	167.051	0.724466	0.204607	3.54076	0.000398969	0.00357619
Cct8	6809.78	0.256665	0.0724847	3.54095	0.000398686	0.00357619
Pnrc1	1850.22	0.322177	0.090985	3.54099	0.000398634	0.00357619
Tctn1	687.167	0.385023	0.108748	3.54051	0.000399348	0.00357755
Eps8l1	237.291	0.972126	0.274966	3.53545	0.000407088	0.00363861
Stip1	7616.7	0.2521	0.0713597	3.5328	0.000411179	0.00367101
Coq6	567.236	0.325803	0.092285	3.5304	0.000414932	0.00370241
Abhd14b	515.281	0.560969	0.158969	3.5288	0.00041745	0.00372067
Foxb1	13.1431	5.40449	1.53515	3.52049	0.000430752	0.00382839
Ebpl	358.037	0.477202	0.135566	3.52006	0.000431445	0.00383239
Fancg	489.473	0.364169	0.103463	3.51981	0.000431858	0.00383389
Pgd	1061.49	0.273757	0.0778567	3.51617	0.000437821	0.00387809
Rnpc3	1251.86	0.42863	0.121943	3.515	0.000439753	0.00389301
Hfm1	82.1667	0.683677	0.194599	3.51326	0.000442644	0.00390837
Ppfia1	2775.21	0.251008	0.071485	3.51134	0.000445854	0.00392496
Rhno1	360.735	0.363675	0.103584	3.51091	0.000446567	0.00392905
Rccd1	311.849	0.388786	0.110786	3.50933	0.000449231	0.00394586
Spr	889.531	0.356102	0.101528	3.50743	0.00045246	0.0039698
Irx3	171.735	1.75994	0.501903	3.50654	0.000453968	0.00398081
Gstp1	2001.97	0.408583	0.116538	3.506	0.000454889	0.00398667
Mroh7	97.9986	0.722422	0.206111	3.50502	0.000456578	0.00399788
Ttc12	117.619	0.786451	0.2244	3.50468	0.000457159	0.00399989
Snx32	2310.22	0.272455	0.0777852	3.50266	0.000460644	0.00402814
Pcdhb9	563.354	0.283253	0.080896	3.50144	0.000462747	0.00404429
Ahcy	464.112	0.413172	0.1181	3.49848	0.000467913	0.00408037
Dzip3	4240.16	0.306851	0.0877295	3.4977	0.000469288	0.0040901
Hoxc4	15.0971	6.93204	1.98445	3.49318	0.000477304	0.00415078
Abcb6	597.871	0.334326	0.0957779	3.49064	0.000481873	0.00418358
Aldh9a1	1337.78	0.280587	0.0804735	3.4867	0.000489019	0.00424095
Taf15	1957.56	0.284973	0.0820289	3.47406	0.000512647	0.00441909
Ctbp2	2021.42	0.397031	0.114424	3.46982	0.0005208	0.00447956
Clcn5	502.411	0.395838	0.11427	3.46407	0.000532074	0.00456656
Atg9b	136.207	0.796126	0.230155	3.45908	0.000542016	0.00463925
Zfp783	287.3	0.419128	0.12119	3.45844	0.000543321	0.00464789
Tbx2	99.1673	0.872641	0.252396	3.45743	0.000545362	0.00466278
Rbm4b	596.675	0.315542	0.0913422	3.4545	0.000551306	0.00470597
Syde1	570.957	0.380517	0.110178	3.45365	0.000553056	0.00471544
Dgkk	85.4209	2.03787	0.590085	3.45352	0.000553313	0.00471544
Abracl	236.588	0.521557	0.151238	3.44859	0.000563529	0.00479471
Gtf2h2	695.46	0.276672	0.080245	3.44785	0.000565075	0.00480527
Pgbd1	120.5	0.610677	0.177165	3.44694	0.000566983	0.00481889
Ehbp1l1	645.034	0.291283	0.0846154	3.44244	0.000576501	0.00488803
Irgm1	470.165	0.45378	0.131993	3.43791	0.000586232	0.00496642
Mccc2	860.771	0.298561	0.0868996	3.4357	0.000591026	0.00500165
Vax2	3.57773	6.06275	1.76476	3.43545	0.000591579	0.00500364
Pax3	163.809	4.30548	1.25398	3.43346	0.00059593	0.00503233
Amy1	275.276	0.579968	0.169506	3.42152	0.000622711	0.00523044
Prpsap2	1333.85	0.322665	0.0945592	3.4123	0.000644165	0.00539393
H2afy2	900.518	0.395236	0.116026	3.40643	0.000658178	0.00550486
LOC100503496	53.5554	0.936808	0.275423	3.40135	0.000670547	0.00559345
Isoc1	1012.21	0.656421	0.192984	3.40142	0.000670359	0.00559345
Mina	344.263	0.383428	0.112736	3.40111	0.000671126	0.00559532
Sirt1	1085.38	0.299432	0.0880925	3.39907	0.000676155	0.00562831
Gstm4	261.763	0.534889	0.157418	3.39788	0.000679104	0.00564987
Ispd	408.169	0.433791	0.128005	3.38886	0.000701831	0.00581438
Col9a2	350.528	0.493326	0.145599	3.38826	0.000703387	0.0058242
Ergic3	2620.04	0.266141	0.0785853	3.38665	0.000707514	0.00585223
Zfp866	1545.71	0.256376	0.0758698	3.37916	0.000727088	0.00597723
Gm11696	100.656	0.603108	0.178494	3.37887	0.000727851	0.00597961
0610011F06Rik	658.914	0.407688	0.120674	3.37844	0.000728983	0.00598267
Dnajc17	264.55	0.429797	0.127578	3.3689	0.000754702	0.00617123
Fam149a	1498.87	0.304039	0.0902994	3.36702	0.000759864	0.006207
Ptprr	2970.96	0.374837	0.111461	3.36293	0.00077119	0.00627997
Letm2	440.959	0.39455	0.117365	3.36173	0.000774564	0.00630093
Mpp7	1037.92	0.41995	0.124976	3.36024	0.000778755	0.00633176
Man2c1	1743.86	0.349219	0.10394	3.35981	0.00077997	0.00633836
BC017643	702.637	0.296325	0.0882573	3.35751	0.000786469	0.00638459
Arpc5	2688.28	0.26101	0.0778015	3.35482	0.000794153	0.00644364
Osgep	688.721	0.260157	0.0775892	3.35301	0.000799375	0.00647267
Efemp2	394.911	0.411383	0.12313	3.34104	0.00083465	0.00669633
Capn11	23.283	2.46036	0.737	3.33834	0.000842793	0.00675478
Bbs9	581.029	0.32591	0.0977048	3.33566	0.000850975	0.0068065
Abcd4	460.462	0.426106	0.128096	3.32646	0.000879565	0.00699963
Hap1	4303.98	0.5759	0.173257	3.32396	0.000887476	0.0070519
Mief2	509.085	0.315193	0.094854	3.32293	0.000890776	0.00707455
Sirt5	366.607	0.372671	0.112296	3.31864	0.000904565	0.00717682
Hars	2865.12	0.267473	0.0806914	3.31476	0.000917203	0.00725152
Bmp5	415.441	0.685519	0.206804	3.31482	0.000917029	0.00725152
Hars2	1025.21	0.271544	0.0820312	3.31025	0.000932111	0.0073399
Htra2	819.922	0.336462	0.101716	3.30786	0.000940121	0.00739928
Dsc2	38.9485	1.34529	0.406948	3.3058	0.000947041	0.00743146
Sema6c	1010.21	0.382175	0.11588	3.29802	0.000973697	0.00761786
H2afy	3130.88	0.277099	0.0841462	3.29307	0.000991004	0.00773789
Pola2	234.992	0.481611	0.146275	3.29251	0.000992966	0.007748
2810410L24Rik	212.98	0.562914	0.171001	3.29187	0.000995245	0.00775946
Fyco1	2345.18	0.31219	0.094871	3.29067	0.000999479	0.00778477
Cers2	2212.9	0.402402	0.122307	3.29009	0.00100155	0.00779706
Rps6ka6	274.011	0.437155	0.132906	3.2892	0.00100473	0.00781019
Tmub1	605.106	0.347215	0.105806	3.28162	0.00103213	0.00799302
Arl6	1084.17	0.330571	0.100878	3.27695	0.00104933	0.00809301
Lca5	461.763	0.478726	0.146123	3.2762	0.00105215	0.00810679
Pim2	1281.65	0.295644	0.0902596	3.27549	0.00105479	0.00812316
Spire2	641.315	0.298209	0.0912293	3.26878	0.00108012	0.00828579
Me2	966.841	0.285883	0.087484	3.26783	0.00108375	0.00830961
Parp2	669.965	0.284076	0.0869907	3.26559	0.00109238	0.00835065
Dis3l	1356.76	0.266034	0.0814687	3.26547	0.00109281	0.00835065
Pwp1	820.957	0.28073	0.0859758	3.26522	0.0010938	0.00835414
Sox14	15.8407	4.64846	1.42393	3.26453	0.00109645	0.00837036
Wtip	189.229	0.693582	0.213306	3.25157	0.00114768	0.00873603
Adck5	379.486	0.358087	0.110139	3.25123	0.00114907	0.00874235
Eme2	423.69	0.323726	0.0995973	3.25035	0.00115262	0.00876089
Ddx5	41131.9	0.26206	0.0806441	3.24959	0.00115573	0.00878035
Bach1	1030.29	0.319457	0.0986502	3.23828	0.00120255	0.00908777
Catsperd	29.9692	1.16812	0.360715	3.23835	0.00120222	0.00908777
2410002F23Rik	1779.56	0.264699	0.0817793	3.23675	0.00120899	0.00913043
Tfap4	209.491	0.653559	0.20201	3.23528	0.00121525	0.00916616
4931429I11Rik	32.1319	1.36595	0.422372	3.23399	0.00122075	0.00919882
Crybb3	15.9019	1.43494	0.443793	3.23336	0.00122343	0.00921025
D030028A08Rik	217.163	0.458037	0.14183	3.22948	0.00124016	0.00931834
Lrp10	1286.29	0.265732	0.0824318	3.22366	0.00126564	0.00948718
Slc5a6	1008.44	0.265405	0.0823856	3.2215	0.00127521	0.00954981
Bloc1s5	606.347	0.335202	0.104059	3.22126	0.0012763	0.00955346
Fstl5	1738.94	0.607173	0.188535	3.22047	0.00127979	0.00957505
Hspd1	5947.73	0.253605	0.0788242	3.21735	0.00129379	0.00966595
Dus3l	2136.97	0.335826	0.104422	3.21603	0.00129975	0.00970131
Nphp1	517.364	0.397535	0.123726	3.21303	0.00131341	0.00979817
Zfp647	160.338	0.560787	0.174581	3.21219	0.00131729	0.00981827
Cib2	600.29	0.551032	0.171588	3.21136	0.00132107	0.00984181
2410004P03Rik	70.2733	1.0886	0.33925	3.20886	0.00133264	0.00991389
Pcbd2	222.827	0.481109	0.150005	3.20729	0.00133994	0.0099494
Zfp692	915.155	0.458518	0.143035	3.20564	0.00134764	0.00999249
Mat2a	6408.78	0.265451	0.0829424	3.20042	0.00137227	0.0101464
Mab21l1	1358.17	1.31705	0.411972	3.19694	0.00138894	0.0102505
Hexdc	735.54	0.334568	0.104681	3.19606	0.00139316	0.010272
Nol7	1882.02	0.309011	0.0967143	3.19509	0.00139786	0.010297
Rdm1	167.665	0.521394	0.163349	3.1919	0.0014134	0.0103872
Zfp64	466.373	0.313423	0.0982026	3.1916	0.00141488	0.0103884
2310003H01Rik	622.255	0.342382	0.107287	3.19126	0.00141654	0.0103957
Mirg	362.765	0.610852	0.191705	3.18643	0.00144042	0.0105569
Dnah5	212.352	0.539863	0.169551	3.18407	0.00145219	0.0106226
Pcdha9	234.148	0.527996	0.166035	3.18002	0.00147265	0.0107374
Slc39a6	2112.47	0.284216	0.0894323	3.178	0.00148293	0.0108023
Nucb2	411.513	0.338052	0.106383	3.17768	0.00148456	0.0108092
Actr5	242.029	0.446853	0.140652	3.17701	0.001488	0.0108292
Nt5c1a	251.114	0.469128	0.147703	3.17615	0.00149242	0.0108514
C530008M17Rik	2221.06	0.438265	0.138035	3.17503	0.00149823	0.0108886
Perp	282.065	0.461221	0.145394	3.17222	0.0015128	0.0109692
Zkscan16	1319.28	0.409335	0.129371	3.16404	0.00155598	0.0112357
Hnrnpa2b1	12955.1	0.285715	0.0903773	3.16136	0.00157035	0.011324
Rnf215	746.752	0.272033	0.0860976	3.15959	0.0015799	0.01138
Mmp11	65.2086	0.690493	0.218654	3.15792	0.00158897	0.0114373
Lysmd1	184.812	0.488159	0.154764	3.15422	0.0016093	0.0115466
Iqcd	33.817	0.956627	0.303261	3.15446	0.00160794	0.0115466
Trim27	909.091	0.279321	0.0885945	3.1528	0.00161714	0.0115923
Ilvbl	1036.55	0.30246	0.096152	3.14565	0.00165721	0.0118472
Myl6	5780.53	0.308782	0.0982243	3.14364	0.00166859	0.0119062
Fkbp1b	703.568	0.540195	0.171854	3.14333	0.00167038	0.0119089
Traf3ip2	85.0736	1.13896	0.362439	3.14249	0.00167518	0.0119324
Agpat9	228.823	0.440694	0.140262	3.14193	0.0016784	0.0119499
Morc4	207.295	0.492477	0.156887	3.13906	0.00169493	0.0120457
Nmral1	294.871	0.441096	0.140572	3.13787	0.00170178	0.0120748
Cdc25a	500.583	0.331697	0.105709	3.13782	0.00170208	0.0120748
F730043M19Rik	350.466	0.395833	0.126222	3.13599	0.00171273	0.0121339
Ring1	1034.85	0.263117	0.0839236	3.1352	0.00171738	0.0121505
Zfp53	253.477	0.390534	0.124738	3.13083	0.00174314	0.0123162
Wbp5	3002.27	0.325557	0.104081	3.12794	0.00176038	0.0124268
Mbip	643.01	0.280227	0.0899571	3.11512	0.00183871	0.0129161
Hps1	284.447	0.415199	0.13331	3.11453	0.00184235	0.0129359
Rpgrip1	22.652	1.32587	0.42615	3.11127	0.00186282	0.0130505
Nhlh2	366.246	1.67756	0.539606	3.10885	0.00187816	0.013123
Gpaa1	1132.97	0.257114	0.08273	3.10787	0.00188441	0.0131608
Gmpr2	609.703	0.310712	0.0999807	3.10772	0.00188534	0.0131614
Pcgf2	998.49	0.304739	0.0981206	3.10575	0.00189795	0.0132377
Rnf128	1146.23	0.315766	0.10177	3.10273	0.00191743	0.0133559
Meis1	1184.62	1.19356	0.384816	3.10163	0.00192456	0.0133937
Plin5	16.0152	1.51679	0.489317	3.09982	0.0019364	0.0134637
Gpnmb	104.963	0.710524	0.229362	3.09783	0.00194943	0.0135233
Myt1	1959.44	0.454898	0.14691	3.09643	0.00195863	0.0135708
Wdr52	114.371	0.888661	0.287084	3.09548	0.00196496	0.0136027
Uchl1	12835	0.510222	0.16511	3.09019	0.00200029	0.0138351
Aatf	647.885	0.371407	0.120208	3.0897	0.00200362	0.0138521
Arhgap36	45.9179	2.01751	0.653087	3.08919	0.002007	0.0138694
Odf3b	72.4885	1.0261	0.332963	3.08174	0.00205797	0.014178
Hist2h2be	435.007	0.389268	0.126405	3.07954	0.0020732	0.0142705
Lhx5	283.439	3.58917	1.1659	3.07844	0.00208085	0.0143044
Leprel2	811.375	0.498842	0.16221	3.07528	0.00210306	0.0144489
Dnah7b	306.745	0.571794	0.186744	3.06192	0.00219921	0.0150067
Slc35b3	317.281	0.364308	0.11911	3.05859	0.00222383	0.0151286
Ankra2	1299.1	0.251906	0.0823637	3.05846	0.00222476	0.0151286
Arhgef28	930.321	0.447146	0.146277	3.05684	0.00223683	0.0151779
Gabrq	77.3828	1.70143	0.557221	3.05343	0.00226243	0.0153186
Capn1	1006.33	0.258467	0.0846703	3.05262	0.00226851	0.0153465
Asxl3	536.657	0.379767	0.124436	3.05191	0.00227391	0.0153711
Gm5148	123.694	0.612477	0.200741	3.05108	0.00228022	0.0153993
Gbe1	588.712	0.326532	0.107113	3.04848	0.00229999	0.0154996
Itfg2	1156.57	0.252289	0.0827803	3.0477	0.00230601	0.0155202
Slc35f2	172.732	0.515974	0.169533	3.04349	0.00233849	0.015712
Smyd4	476.237	0.292627	0.0961669	3.04291	0.00234304	0.0157291
Cyp4x1	402.351	0.330758	0.108785	3.04048	0.00236198	0.0158428
Ino80b	394.339	0.388566	0.127843	3.0394	0.00237053	0.0158798
Plce1	1445.61	0.441223	0.145212	3.03847	0.00237782	0.0159219
2610001J05Rik	1360.11	0.43964	0.144899	3.03411	0.00241244	0.0161263
Mei4	64.8713	0.832929	0.274776	3.0313	0.002435	0.0162564
Hdac10	432.258	0.32606	0.10766	3.02862	0.00245673	0.0163876
Ech1	1255.11	0.268469	0.0886707	3.02771	0.00246415	0.0164162
Fbxo6	528.013	0.368291	0.121694	3.02636	0.00247521	0.016469
Hypk	1090.98	0.28002	0.092606	3.02378	0.00249638	0.0165958
Plod2	426.722	0.446781	0.147853	3.02179	0.00251288	0.0166835
Vps28	2652.78	0.304541	0.100841	3.02	0.00252775	0.0167548
Dmap1	893.347	0.27681	0.0919494	3.01046	0.0026085	0.0172248
Efna2	310.687	0.4107	0.13655	3.00769	0.00263239	0.0173462
Tec	109.725	0.538738	0.179113	3.00781	0.00263137	0.0173462
Wbscr16	404.861	0.337744	0.112328	3.00678	0.00264035	0.0173841
Ctps2	1601.67	0.274562	0.0913521	3.00554	0.00265111	0.0174292
Taz	1208.21	0.265088	0.0882159	3.00499	0.00265587	0.0174498
Bbs7	720.584	0.278136	0.0926528	3.00192	0.00268284	0.017605
Tmc3	34.2724	1.341	0.446697	3.00204	0.0026818	0.017605
Hmces	513.663	0.278477	0.0928147	3.00036	0.00269661	0.0176807
Ghsr	8.13638	2.48144	0.827426	2.99898	0.00270882	0.017746
Prps1	2625.37	0.28641	0.0956857	2.99324	0.00276029	0.0180306
Khdrbs2	279.211	0.407999	0.136419	2.99078	0.00278264	0.0181691
Hnf1b	30.6256	1.02898	0.344214	2.98937	0.00279557	0.0182459
N4bp2l1	1009.03	0.35164	0.117673	2.98828	0.00280551	0.0182957
Mybl1	476.123	0.413152	0.138376	2.98573	0.00282906	0.0184263
Trim26	997.982	0.257799	0.0865064	2.98011	0.00288145	0.0186902
Araf	5858.85	0.255858	0.0858527	2.9802	0.00288057	0.0186902
Gng4	2226.62	1.02956	0.345532	2.97964	0.00288585	0.0187111
Lmbr1l	352.929	0.418689	0.140651	2.97679	0.00291283	0.0188318
Znrf2	755.7	0.259658	0.0872688	2.97538	0.00292622	0.0189076
Afmid	98.9627	0.940417	0.316154	2.97455	0.00293417	0.0189464
Slc5a5	495.843	0.483619	0.162648	2.97341	0.00294508	0.0190013
Pax7	20.3689	6.10467	2.05624	2.96885	0.00298915	0.0192462
Pipox	66.8739	1.03522	0.348823	2.96775	0.00299993	0.0192919
Clk4	1467.86	0.339925	0.114644	2.96506	0.00302628	0.0194376
Glra2	465.629	0.538941	0.18179	2.96463	0.00303051	0.0194543
Cpxm2	101.89	0.650562	0.219519	2.96358	0.00304079	0.0195069
Timm22	938.293	0.299018	0.100956	2.96186	0.00305786	0.0195686
Nudt11	1290.82	0.251966	0.0850633	2.9621	0.00305546	0.0195686
Trp53	667.293	0.30651	0.103545	2.96016	0.00307478	0.0196689
Dcaf12l1	1913.51	0.252993	0.085475	2.95984	0.00307796	0.0196812
Pld2	599.97	0.281494	0.0952721	2.95463	0.00313043	0.01996
2310030G06Rik	71.2221	0.607132	0.205641	2.95239	0.00315325	0.0200892
Ddx26b	1742.63	0.276455	0.0936361	2.95244	0.00315272	0.0200892
Mir3064	168.346	0.727162	0.246493	2.95004	0.00317737	0.020208
Hnrnph1	9102.2	0.318583	0.108116	2.94668	0.00321203	0.0203888
Zfp110	1009.58	0.280118	0.09509	2.94582	0.00322098	0.0204134
Bag2	434.714	0.380768	0.129334	2.94406	0.00323935	0.020505
Kdelc1	329.312	0.405986	0.138118	2.93941	0.00328839	0.0207737
Morn2	273.376	0.376333	0.128108	2.93762	0.00330742	0.0208521
Lhx4	3.86042	4.25833	1.45077	2.93523	0.00333304	0.0209898
Dennd6b	2533.17	0.389763	0.132789	2.93521	0.00333326	0.0209898
Fam126a	750.548	0.358265	0.122132	2.93344	0.00335233	0.0210678
Hnrnpdl	7117.96	0.285256	0.0972604	2.93292	0.00335795	0.0210947
Rrnad1	746.175	0.274185	0.0935992	2.92936	0.00339665	0.0213208
Zcchc16	114.501	0.48064	0.16461	2.91987	0.00350178	0.0218414
Plxna3	1210.41	0.365792	0.125388	2.91727	0.00353105	0.0220066
Syt10	355.926	0.487256	0.167034	2.91711	0.00353296	0.0220097
Tmem150c	1358.08	0.261271	0.0896312	2.91495	0.00355746	0.0221361
Zfp184	96.8538	0.628492	0.215847	2.91175	0.00359415	0.0223115
Znhit6	509.442	0.251933	0.0866217	2.90843	0.0036325	0.0224964
Met	410.909	0.686198	0.236106	2.90631	0.0036572	0.0225872
Scrn2	161.167	0.516743	0.177934	2.90413	0.00368274	0.0227181
Dmgdh	15.4987	1.53464	0.528855	2.90181	0.00371009	0.022869
Prkdc	1214.23	0.266168	0.0917228	2.90188	0.00370936	0.022869
0610037L13Rik	867.044	0.257231	0.088995	2.8904	0.00384751	0.0236235
Rac3	516.183	0.511759	0.177105	2.88958	0.00385757	0.0236761
Rad21l	16.8057	1.25957	0.436476	2.88576	0.00390464	0.0239184
Ccdc117	1005.22	0.26724	0.0926967	2.88295	0.00393974	0.0240585
Rhbdd1	517.972	0.333601	0.115733	2.88251	0.00394518	0.0240797
Zfp516	908.455	0.443473	0.153913	2.88132	0.00396012	0.0241476
Cwc22	804.836	0.267066	0.0926895	2.88129	0.00396046	0.0241476
Slc4a7	1286.53	0.289785	0.100726	2.87696	0.0040152	0.024453
Mycl	415.137	0.410104	0.142716	2.87358	0.00405849	0.0246689
Pigv	298.219	0.36125	0.125852	2.87043	0.00409911	0.0248678
Zfhx4	874.621	0.466952	0.1627	2.87002	0.00410449	0.0248813
Aff2	664.089	0.267187	0.0931162	2.8694	0.00411254	0.0249205
Rad51	62.615	0.797929	0.278314	2.86701	0.00414367	0.0250802
Zfp677	127.844	0.572882	0.199989	2.86457	0.0041757	0.0252159
Hfe	197.712	0.530926	0.185357	2.86435	0.00417872	0.0252245
Hist1h4i	41.7788	1.07337	0.375904	2.85543	0.00429781	0.0258246
Nif3l1	807.688	0.287624	0.100783	2.85388	0.00431885	0.0259214
Cep78	422.102	0.299631	0.105019	2.8531	0.00432956	0.0259757
Slc16a11	731.91	0.446431	0.15658	2.85114	0.00435626	0.0260962
Spin4	90.2065	0.674105	0.236425	2.85124	0.00435493	0.0260962
D3Ertd751e	873.904	0.268551	0.0942184	2.8503	0.00436782	0.0261554
Tcf24	18.4227	1.45811	0.511623	2.84998	0.00437222	0.0261718
Dcps	466.57	0.358526	0.126012	2.84517	0.00443884	0.0265303
Btf3	2646.91	0.338992	0.11917	2.8446	0.00444671	0.0265572
Myo1h	42.7236	0.875637	0.308218	2.84096	0.00449776	0.026801
Gm20554	25.9742	3.76162	1.32593	2.83697	0.00455436	0.0270973
Stk36	206.533	0.651943	0.230267	2.83125	0.00463665	0.0274935
Flot1	3180.28	0.268544	0.094925	2.82901	0.00466921	0.0276528
Crtc2	1078.52	0.285949	0.101085	2.82879	0.0046724	0.0276528
Ifnlr1	12.0076	1.88327	0.666146	2.82711	0.00469695	0.0277674
Dhdh	428.252	0.285622	0.101038	2.82688	0.0047004	0.0277773
Kdelc2	498.506	0.273929	0.0969645	2.82505	0.00472734	0.0279051
Gmds	276.465	0.331956	0.117544	2.82411	0.00474117	0.0279763
Ift46	1346.86	0.288859	0.102448	2.81957	0.0048088	0.0283223
Zic3	411.683	0.514426	0.182507	2.81866	0.00482246	0.0283921
Gjc1	199.656	0.511097	0.181403	2.81747	0.00484035	0.0284761
Fbl	599.087	0.298413	0.105957	2.81637	0.00485703	0.0285317
Plscr4	306.594	0.376322	0.133777	2.81306	0.00490718	0.028794
Morn5	14.9712	1.46297	0.520944	2.8083	0.0049804	0.029126
Gpx8	176.611	0.617661	0.21997	2.80793	0.0049861	0.0291377
Sh3yl1	361.995	0.387338	0.137988	2.80704	0.00499989	0.0291883
Tekt1	55.3669	1.15459	0.411737	2.80418	0.00504449	0.0294243
Tctex1d1	11.2384	1.71395	0.611569	2.80254	0.00507012	0.029541
BC089491	17.1421	1.17226	0.41849	2.80115	0.00509203	0.0296577
Prmt1	2317.37	0.252595	0.0902702	2.79821	0.00513871	0.0298633
Fah	693.247	0.264463	0.0945091	2.79828	0.00513749	0.0298633
Eri2	482.906	0.28642	0.102398	2.79712	0.00515603	0.0299529
1500009L16Rik	406.18	0.378063	0.135246	2.79538	0.0051839	0.0300926
Dguok	465.234	0.299493	0.107243	2.79265	0.0052278	0.0302805
Dpyd	212.212	0.473047	0.169817	2.78563	0.00534241	0.0307858
Calca	27.5223	1.28547	0.462131	2.78161	0.00540898	0.0310898
Hmgn1	1831.81	0.259676	0.0933637	2.78134	0.00541346	0.0310929
AW146154	159.304	0.446203	0.160559	2.77906	0.00545156	0.0312775
H3f3b	10624.7	0.287605	0.103587	2.77645	0.00549559	0.0315186
Rps6kb2	798.623	0.373226	0.134493	2.77506	0.00551915	0.0316008
Plin2	321.158	0.378809	0.136519	2.77476	0.0055242	0.0316136
Cd151	913.585	0.256711	0.0926636	2.77035	0.00559956	0.0319404
Lhx1	847.466	2.83843	1.02681	2.76432	0.0057041	0.0324247
Lrrc45	1170.89	0.371876	0.134635	2.76212	0.00574281	0.0325688
Rnf31	911.168	0.281889	0.102047	2.76234	0.00573892	0.0325688
Ammecr1	126.244	0.456295	0.165191	2.76222	0.00574089	0.0325688
Msantd2	445.924	0.286317	0.103919	2.75519	0.00586575	0.0331943
2310033P09Rik	437.213	0.252118	0.0915374	2.75426	0.00588254	0.0332535
Prorsd1	139.826	0.489463	0.177846	2.75217	0.00592018	0.0334422
Rnf138rt1	17.4522	1.3637	0.49553	2.75201	0.00592315	0.033447
Enkur	94.9356	0.650864	0.236581	2.75113	0.00593903	0.0335127
Sptssa	1042.33	0.298742	0.108671	2.74906	0.0059766	0.0336884
Pou4f2	33.5386	5.94533	2.16285	2.74884	0.00598074	0.0336997
Ntn4	863.433	0.341243	0.124197	2.7476	0.00600325	0.0338144
Nudt12	369.295	0.341053	0.124142	2.74728	0.00600924	0.0338361
Chic2	381.285	0.320051	0.116503	2.74715	0.00601156	0.033837
Slc18a2	30.6894	3.20913	1.16969	2.74357	0.00607753	0.0341352
Fbxl6	737.185	0.289645	0.105632	2.74202	0.0061062	0.0342351
Supt20	1017.67	0.275234	0.100443	2.74019	0.00614038	0.0343656
Thyn1	1278.26	0.308158	0.112533	2.73837	0.00617438	0.0345191
Bex2	6186.18	0.271801	0.099265	2.73814	0.00617885	0.0345318
Pus3	370.213	0.296752	0.108479	2.73557	0.00622718	0.0347649
Mrap2	210.693	0.702583	0.256908	2.73477	0.0062424	0.0348006
Ankrd44	716.378	0.26797	0.0980763	2.73226	0.00629017	0.0350023
Naga	754.304	0.2567	0.0939663	2.73184	0.00629825	0.0350023
AW551984	281.238	1.75128	0.641064	2.73184	0.00629818	0.0350023
Tonsl	180.558	0.378574	0.138605	2.73131	0.00630827	0.0350437
Sap30	289.282	0.57046	0.208915	2.73059	0.00632212	0.0350959
Helb	227.974	0.40535	0.148609	2.72762	0.00637928	0.0353385
Mob3a	454.962	0.310321	0.114115	2.71936	0.00654081	0.0360526
Nqo1	236.878	0.494133	0.182031	2.71455	0.00663668	0.0364693
Ctf1	63.1744	0.759922	0.279998	2.71403	0.00664699	0.0365132
Dact1	841.226	0.401964	0.148133	2.71353	0.00665698	0.0365554
Med30	603.505	0.377927	0.139282	2.71339	0.00665982	0.0365582
Cxxc4	1711.15	0.257107	0.0947871	2.71247	0.00667841	0.0366347
Gng3	6733.73	0.340715	0.125824	2.70786	0.00677179	0.0370695
Tceal8	2141.96	0.255192	0.0943318	2.70526	0.00682509	0.0372577
Arhgap22	148.341	0.686761	0.25397	2.7041	0.006849	0.0373364
Galr1	30.6609	2.08128	0.769782	2.70372	0.00685679	0.037353
Msl3l2	638.038	0.282075	0.104336	2.70353	0.00686075	0.0373617
Acp6	375.017	0.305643	0.113134	2.70159	0.00690083	0.037554
Cyp2s1	167.939	0.541065	0.200429	2.69954	0.00694354	0.0377603
Cited2	2875.7	0.332934	0.12334	2.69931	0.00694834	0.0377733
Dnph1	66.1782	0.580003	0.214923	2.69865	0.00696204	0.0378348
Mstn	17.968	1.35042	0.501047	2.6952	0.0070347	0.0381704
Cdkl3	427.635	0.375778	0.139428	2.69514	0.00703592	0.0381704
Gata3	30.9573	4.45517	1.65374	2.694	0.00706002	0.038288
Rcn1	651.898	0.269375	0.100084	2.69149	0.00711338	0.0385375
Tcea2	799.745	0.266643	0.0991505	2.68928	0.00716068	0.0387006
Rtel1	854.149	0.424458	0.1579	2.68814	0.00718506	0.0388057
Fahd2a	513.624	0.349317	0.130147	2.68402	0.0072742	0.0391529
Ptpn20	24.0424	1.07781	0.401814	2.68235	0.00731073	0.0393092
Zfp446	430.878	0.378352	0.141154	2.68042	0.00735308	0.039483
Capn12	29.2421	1.01827	0.380471	2.67633	0.00744325	0.0399263
Stambpl1	619.741	0.317721	0.118726	2.67609	0.00744871	0.039942
Pfdn4	625.557	0.318994	0.119244	2.67515	0.00746969	0.0400136
Tmem9	2037.99	0.271633	0.101577	2.67417	0.00749135	0.0401161
Gab2	1056.67	0.253458	0.094933	2.66986	0.00758828	0.0405661
Rbm11	265.267	0.567328	0.212554	2.6691	0.00760548	0.0406443
Dedd2	565.201	0.296919	0.111324	2.66716	0.00764955	0.0408382
Zfp449	297.55	0.313569	0.117813	2.66158	0.00777737	0.0414083
Xpa	286.311	0.510149	0.191703	2.66114	0.00778765	0.041449
Gng10	1120.53	0.302509	0.113707	2.66044	0.00780387	0.0415073
Gm9866	688.459	0.372074	0.140003	2.65761	0.00786978	0.0417873
Kif6	51.2269	0.812823	0.306995	2.64768	0.00810467	0.042818
Islr2	1512.62	0.416794	0.157482	2.64662	0.00813007	0.042909
Apex1	937.901	0.289677	0.109496	2.64554	0.00815603	0.0430028
9930012K11Rik	53.8012	0.698806	0.264248	2.64451	0.0081809	0.0431051
Lrrc61	999.701	0.270972	0.102553	2.64228	0.0082351	0.0433544
Ifitm7	11.5602	1.44299	0.546691	2.63949	0.00830304	0.0436464
Trmt13	233.423	0.359135	0.136258	2.63571	0.00839619	0.0440919
Capn10	977.564	0.255042	0.0968164	2.63428	0.00843152	0.044189
Pask	126.505	0.507184	0.19258	2.63363	0.00844781	0.044245
Lamb1	902.115	0.388404	0.147477	2.63366	0.00844694	0.044245
Pkdcc	271.33	0.350353	0.133168	2.63092	0.00851548	0.044481
Acot1	257.55	0.319757	0.12155	2.63067	0.00852163	0.0444984
Enox2	469.192	0.318213	0.121008	2.62968	0.00854641	0.044605
Rsph4a	136.526	0.796347	0.303291	2.62568	0.00864754	0.0450602
Zc3hav1	271.602	0.451034	0.171916	2.62356	0.00870149	0.0451533
F2r	260.6	0.389709	0.148962	2.61616	0.00889241	0.0460074
Arl5c	61.2984	0.67498	0.258161	2.61457	0.00893393	0.0461616
Spint2	880.334	0.45532	0.174183	2.61402	0.00894831	0.0462056
Calcr	6.7509	3.85217	1.47429	2.61289	0.00897798	0.0463132
Hoxb2	6.95971	4.2218	1.61651	2.61167	0.00901022	0.0464643
Armcx1	3521.44	0.25679	0.0984904	2.60726	0.00912707	0.0470053
Otp	4.30436	3.87862	1.48822	2.60621	0.009155	0.0471179
Six3os1	39.6224	1.86239	0.715113	2.60433	0.00920528	0.0472998
Trp73	131.385	0.802956	0.308658	2.60145	0.00928319	0.0476225
Snapin	2065.61	0.257925	0.0993494	2.59614	0.00942778	0.0482542
Gm5124	626.933	0.25142	0.096887	2.59499	0.0094595	0.0483694
Tceal1	1350.42	0.285498	0.110083	2.59348	0.00950109	0.0485348
Snhg3	218.249	0.454523	0.175271	2.59326	0.00950709	0.0485497
Prss35	103.148	0.500333	0.193103	2.59102	0.00956916	0.0487717
Fgf10	300.002	0.536755	0.207306	2.58919	0.00962012	0.0489998
Pisd-ps2	895.197	0.557393	0.215318	2.5887	0.0096339	0.0490541
Adprm	429.509	0.285096	0.110232	2.58632	0.00970069	0.0493044
Pitx2	4.89169	4.48911	1.73575	2.58626	0.0097024	0.0493044
Caprin2	309.414	0.370261	0.143177	2.58603	0.0097089	0.0493044
C2cd4d	22.9577	1.27288	0.492769	2.58311	0.00979146	0.0496477
Taf1d	449.931	0.26819	0.103846	2.58259	0.00980629	0.0497069
Slc31a2	387.433	0.314772	0.121892	2.58237	0.00981231	0.0497193
Zfp54	75.6453	0.636863	0.246745	2.58106	0.00984976	0.0498494
2010320M18Rik	137.212	0.48002	0.185979	2.58104	0.00985024	0.0498494
Msrb2	523.683	0.288548	0.111828	2.58029	0.00987163	0.0499416

## Sheet: Cerebellum- Downregulated DEGs
Downregulated DEGs in SCA1 KI Cerebellum
Gene	baseMean	log2FoldChange	lfcSE	stat	pvalue	padj
Nrgn	32404.2	-4.23512	0.184318	-22.9772	7.87956e-117	1.24095e-112
Gda	8453.18	-3.1059	0.217454	-14.283	2.79272e-46	2.19913e-42
Kcnip2	2359.11	-2.67032	0.194222	-13.7488	5.17736e-43	2.71794e-39
Ddn	20079.4	-3.392	0.26245	-12.9244	3.27869e-38	1.2909e-34
Cpne6	3502.45	-2.30974	0.180236	-12.8151	1.3495e-37	4.25067e-34
Enc1	15999.6	-2.2637	0.180672	-12.5293	5.15905e-36	1.35416e-32
Igfbp5	6592.8	-1.31683	0.106479	-12.367	3.94335e-35	7.76298e-32
Cnih3	1907.77	-1.78499	0.144311	-12.369	3.84445e-35	7.76298e-32
Ngef	6379.71	-1.56291	0.132965	-11.7543	6.71157e-32	1.05701e-28
Rasal1	1584.33	-1.49544	0.12717	-11.7594	6.32102e-32	1.05701e-28
Tcf7l2	649.294	-3.12243	0.267387	-11.6776	1.65933e-31	2.37571e-28
Ptk2b	9454.92	-1.72875	0.152497	-11.3363	8.67524e-30	1.13855e-26
Pcp4	10127.6	-0.679436	0.0624637	-10.8773	1.47895e-27	1.79169e-24
Sst	2397.6	-3.37954	0.311375	-10.8536	1.91686e-27	2.15633e-24
Mdfi	168.162	-1.56221	0.15002	-10.4134	2.15491e-25	2.26251e-22
Paqr7	2453.8	-0.749258	0.0720062	-10.4055	2.34129e-25	2.30456e-22
Kcnh5	854.591	-2.3415	0.229316	-10.2108	1.77394e-24	1.64339e-21
Htr1a	375.023	-3.69652	0.362701	-10.1917	2.16046e-24	1.89028e-21
Cpne5	1583.11	-4.22773	0.415684	-10.1705	2.68449e-24	2.22516e-21
Tfap2d	66.3309	-6.49399	0.646441	-10.0458	9.59051e-24	7.55205e-21
Asic4	310.032	-3.6438	0.363581	-10.022	1.22032e-23	9.15185e-21
Camk2a	67263.5	-1.00802	0.101152	-9.96539	2.16014e-23	1.54637e-20
Cdh9	354.1	-2.06342	0.207742	-9.9326	3.00336e-23	2.05652e-20
Gpr26	1330.07	-1.9906	0.203689	-9.77278	1.47345e-22	9.41926e-20
Icam5	3756.78	-2.77592	0.284089	-9.7713	1.49522e-22	9.41926e-20
Plcb3	1373.06	-0.908001	0.0935433	-9.70675	2.82188e-22	1.7093e-19
Kcnh3	3175.06	-2.05476	0.211828	-9.70012	3.01138e-22	1.75653e-19
Fam19a1	1113.7	-2.62442	0.272089	-9.64542	5.13984e-22	2.89097e-19
Camkv	7379.54	-2.54193	0.263748	-9.63772	5.54045e-22	3.00884e-19
Cbln2	812.266	-4.35964	0.464248	-9.39076	5.95698e-21	3.12721e-18
Lrfn2	513.921	-2.41116	0.259104	-9.30577	1.33024e-20	6.75805e-18
Grm5	5552.57	-1.74229	0.187843	-9.27527	1.77177e-20	8.71986e-18
Vip	817.904	-6.1743	0.674027	-9.16031	5.17498e-20	2.42076e-17
Cckbr	1077.81	-1.93389	0.21114	-9.15925	5.22611e-20	2.42076e-17
Pak6	1729.13	-1.63157	0.178356	-9.14779	5.81111e-20	2.61483e-17
Doc2a	860.232	-3.21074	0.353888	-9.07275	1.16051e-19	5.07691e-17
Rasgrf2	4521.47	-2.58059	0.288011	-8.96003	3.24594e-19	1.38163e-16
Ldb2	1120.24	-2.2294	0.254428	-8.76239	1.91147e-18	7.92205e-16
4930539E08Rik	233.385	-3.79856	0.433897	-8.75451	2.04985e-18	8.27771e-16
Lhx2	1478.02	-3.29319	0.37763	-8.72068	2.76533e-18	1.08878e-15
Kctd12	9529.6	-0.729033	0.0838593	-8.69352	3.51372e-18	1.3497e-15
Car9	71	-2.28921	0.264455	-8.65634	4.8715e-18	1.8267e-15
Sstr1	971.709	-1.43378	0.166674	-8.60233	7.81104e-18	2.86084e-15
Plk5	1030.6	-1.47613	0.173359	-8.51488	1.66763e-17	5.96899e-15
Hs3st2	965.036	-1.86681	0.219803	-8.49309	2.01206e-17	7.04175e-15
Ctxn1	6145.9	-1.54568	0.183408	-8.42758	3.52883e-17	1.20816e-14
Kcnc2	3555.74	-2.2688	0.270949	-8.37351	5.59249e-17	1.87396e-14
Tox3	463.726	-2.17312	0.263554	-8.24543	1.64569e-16	5.39959e-14
Zfp831	736.236	-3.63606	0.441582	-8.23415	1.80839e-16	5.71129e-14
Il20rb	386.301	-1.209	0.146833	-8.23383	1.81322e-16	5.71129e-14
Tac1	367.752	-4.17111	0.508477	-8.20314	2.34189e-16	7.23184e-14
Myo15	36.1313	-2.60587	0.318632	-8.17831	2.87855e-16	8.71812e-14
Tmem215	353.041	-3.9294	0.480765	-8.17321	3.00284e-16	8.92298e-14
Hrh3	1404.93	-1.23637	0.152399	-8.11272	4.94997e-16	1.44365e-13
Clstn2	3046.46	-0.937317	0.115884	-8.08843	6.04397e-16	1.69976e-13
Aldoc	40764.1	-0.641209	0.0793703	-8.0787	6.546e-16	1.80865e-13
Ankrd34c	328.897	-2.42816	0.300821	-8.07176	6.9291e-16	1.88149e-13
Crhbp	380.421	-4.56838	0.569224	-8.02563	1.01004e-15	2.69612e-13
Npy5r	131.539	-3.23197	0.409151	-7.8992	2.80706e-15	7.36805e-13
Hs3st4	1170.95	-3.05599	0.388448	-7.86718	3.62712e-15	9.36451e-13
Synpo	4458.78	-0.750425	0.0961033	-7.80853	5.78603e-15	1.46974e-12
Alad	1029.79	-0.676591	0.0867586	-7.79855	6.2624e-15	1.5655e-12
6330403K07Rik	4687.08	-1.50061	0.19296	-7.77677	7.44018e-15	1.83086e-12
Vstm2b	795.007	-1.54923	0.199627	-7.76063	8.45117e-15	2.04765e-12
Rasgrp2	535.249	-1.56596	0.201875	-7.75706	8.69239e-15	2.07419e-12
Grem2	752.082	-1.84664	0.238975	-7.72734	1.09814e-14	2.58129e-12
Egr3	3276.22	-2.56354	0.333245	-7.69266	1.44106e-14	3.33591e-12
Entpd2	294.91	-0.988372	0.128513	-7.69086	1.46154e-14	3.33591e-12
Unc13d	105.224	-1.38721	0.181194	-7.65595	1.91891e-14	4.31727e-12
Cck	5678.26	-0.964068	0.125963	-7.65357	1.95481e-14	4.3361e-12
Rprml	838.47	-1.73829	0.228701	-7.60074	2.94448e-14	6.26657e-12
Pou4f1	92.9217	-3.77373	0.496264	-7.60427	2.86507e-14	6.26657e-12
Tacr1	96.1864	-4.30059	0.565751	-7.60155	2.92606e-14	6.26657e-12
Elfn1	590.16	-2.10806	0.278057	-7.5814	3.41852e-14	7.17843e-12
Zbtb7c	145.142	-1.71415	0.226758	-7.5594	4.04932e-14	8.28218e-12
Arhgap20	4449.16	-0.487492	0.0644879	-7.55942	4.04855e-14	8.28218e-12
Chn1	23979.8	-0.62115	0.0833533	-7.45202	9.19222e-14	1.83704e-11
Tacr3	67.5126	-3.71898	0.499078	-7.45169	9.21492e-14	1.83704e-11
Dagla	4632.49	-0.687081	0.0928968	-7.39617	1.40164e-13	2.75931e-11
Robo2	4586.02	-0.584022	0.0791269	-7.38083	1.57311e-13	3.05863e-11
Myoc	628.023	-2.04685	0.278466	-7.35044	1.97551e-13	3.79418e-11
Slit1	1243.08	-2.77727	0.379894	-7.31064	2.65879e-13	5.04497e-11
Sertm1	601.918	-1.86196	0.255558	-7.28589	3.19561e-13	5.99138e-11
Dlk2	517.14	-1.97879	0.272195	-7.26973	3.60196e-13	6.67379e-11
Lrrtm4	1038.14	-1.01626	0.14004	-7.25697	3.95859e-13	7.24927e-11
Glra3	147.659	-3.29239	0.455034	-7.23548	4.63891e-13	8.3975e-11
Cpne7	614.479	-3.10324	0.431412	-7.19321	6.32847e-13	1.13258e-10
Kcnj4	2668.59	-1.67402	0.233419	-7.17174	7.40516e-13	1.31038e-10
Zfhx3	459.121	-1.98096	0.277447	-7.13996	9.33555e-13	1.61567e-10
Pou3f1	812.121	-1.19308	0.168006	-7.10144	1.2346e-12	2.11345e-10
Chrm3	1121.33	-1.72943	0.243918	-7.09023	1.33888e-12	2.24319e-10
Cnih2	3818.86	-0.623024	0.0883192	-7.05423	1.73558e-12	2.87722e-10
Cobl	3356.22	-1.35801	0.19262	-7.05023	1.78623e-12	2.93035e-10
Vstm2l	2305.33	-0.995233	0.142489	-6.98462	2.85618e-12	4.63732e-10
Kalrn	13458.5	-0.541525	0.0789142	-6.8622	6.78094e-12	1.08972e-09
Stxbp6	2731.94	-1.17632	0.171477	-6.85994	6.8891e-12	1.09592e-09
Unc5d	2341.17	-0.820518	0.12018	-6.82744	8.64454e-12	1.36143e-09
Tekt5	230.582	-1.88798	0.279262	-6.76063	1.37397e-11	2.14244e-09
Stk32b	56.6665	-3.6441	0.541234	-6.73295	1.66259e-11	2.56708e-09
Eda	193.425	-1.14535	0.170173	-6.7305	1.69079e-11	2.58526e-09
Npy1r	780.192	-1.40685	0.209966	-6.70036	2.07905e-11	3.14836e-09
Rhobtb2	3855.67	-0.598008	0.0893005	-6.69658	2.13354e-11	3.20011e-09
Vwc2l	237.257	-2.30674	0.345781	-6.6711	2.53896e-11	3.77228e-09
Pdyn	382.528	-3.96872	0.595201	-6.66787	2.59537e-11	3.82004e-09
Atl2	6028.55	-0.519349	0.0779297	-6.66433	2.6587e-11	3.87703e-09
Slc24a4	428.966	-1.22585	0.184488	-6.64462	3.04006e-11	4.37574e-09
Necab2	645.888	-2.82679	0.426108	-6.63398	3.26755e-11	4.63609e-09
Tox2	501.098	-1.51551	0.229912	-6.59171	4.34797e-11	6.11395e-09
Ankrd63	480.789	-3.19481	0.484849	-6.5893	4.41894e-11	6.15875e-09
Cartpt	116.496	-3.53225	0.537632	-6.57001	5.03107e-11	6.95038e-09
Lhx9	178.11	-3.8096	0.580118	-6.56693	5.13641e-11	7.0342e-09
Cacnb2	1844.31	-0.492408	0.0754809	-6.5236	6.86389e-11	9.31891e-09
Ngb	127.214	-2.95153	0.452781	-6.51869	7.09262e-11	9.54715e-09
Spag5	582.938	-0.762824	0.117117	-6.51334	7.34985e-11	9.73775e-09
B230209E15Rik	1487.06	-1.92902	0.296939	-6.49634	8.22974e-11	1.07116e-08
Gabrq	77.3828	-3.88955	0.599348	-6.48964	8.60421e-11	1.11072e-08
Pde11a	49.1972	-3.01553	0.465234	-6.48174	9.06688e-11	1.16093e-08
Zfhx4	874.621	-1.05021	0.162154	-6.47658	9.38239e-11	1.19164e-08
Nsg1	19673.3	-0.429427	0.0664161	-6.4657	1.00828e-10	1.27036e-08
Chrm1	3891.56	-1.45575	0.226164	-6.43669	1.22107e-10	1.51422e-08
Camk1d	6547.67	-0.463209	0.0720474	-6.42922	1.28261e-10	1.56588e-08
Resp18	1487.67	-1.45048	0.226042	-6.41687	1.39104e-10	1.68519e-08
Epor	129.263	-1.1499	0.17944	-6.40824	1.47214e-10	1.76982e-08
Sorcs2	1247.47	-1.01595	0.159004	-6.38944	1.66492e-10	1.98642e-08
Mal2	5133.1	-1.24216	0.194994	-6.37026	1.88713e-10	2.23462e-08
Dgkk	85.4209	-3.6515	0.574884	-6.35171	2.1294e-10	2.50268e-08
Kcnq5	2847.09	-1.29629	0.20481	-6.32925	2.4635e-10	2.8739e-08
Six3	93.3858	-7.1127	1.13205	-6.28304	3.32015e-10	3.84479e-08
Tmtc1	4094.67	-0.618428	0.0985731	-6.2738	3.52339e-10	4.02101e-08
Ankfn1	87.4073	-1.66545	0.26577	-6.26649	3.69271e-10	4.18392e-08
Kcnip1	1454.54	-0.586077	0.0941139	-6.22732	4.74495e-10	5.33773e-08
Lmo3	2300.52	-1.91193	0.307861	-6.21035	5.28657e-10	5.90483e-08
Six3os1	39.6224	-7.57051	1.22156	-6.19744	5.73897e-10	6.365e-08
Scg2	8014.84	-0.761878	0.123003	-6.19399	5.86586e-10	6.46024e-08
Nell1	1508.98	-0.715803	0.11649	-6.14474	8.00964e-10	8.69957e-08
Stk32c	2729.41	-1.12798	0.183875	-6.13448	8.54386e-10	9.21625e-08
Nsg2	16558.7	-0.889207	0.145215	-6.12336	9.16207e-10	9.81588e-08
Rxfp3	58.0378	-2.54314	0.415685	-6.11796	9.47838e-10	9.96135e-08
Tal1	253.818	-1.90289	0.311041	-6.1178	9.4876e-10	9.96135e-08
Dlgap2	1745.21	-1.26826	0.207452	-6.11353	9.7452e-10	1.01641e-07
Slc17a6	2236.2	-1.99549	0.328246	-6.07924	1.20753e-09	1.25115e-07
Gfra1	1034.88	-1.43569	0.236211	-6.07801	1.21687e-09	1.25258e-07
Spns2	1865.43	-0.558046	0.0920124	-6.0649	1.3204e-09	1.35032e-07
Hapln4	5756.93	-0.442885	0.0733946	-6.03431	1.59647e-09	1.62211e-07
1700003M07Rik	418.045	-1.29917	0.216136	-6.0109	1.84496e-09	1.85071e-07
Tmem179	2422.9	-1.08054	0.179843	-6.00821	1.87579e-09	1.86974e-07
Rorc	278.619	-0.943922	0.15778	-5.98253	2.19694e-09	2.17608e-07
Fam107b	3476.84	-0.699718	0.117045	-5.97819	2.25634e-09	2.22094e-07
Il34	1166.18	-0.838268	0.140307	-5.97453	2.30754e-09	2.25723e-07
Ak5	3585.15	-0.922901	0.154598	-5.96968	2.37718e-09	2.29682e-07
Cacna1h	914.398	-1.41023	0.236294	-5.96812	2.40007e-09	2.3048e-07
Meis2	2838.27	-2.06325	0.346377	-5.95666	2.57452e-09	2.45734e-07
Npy	1208.42	-0.70936	0.1197	-5.92613	3.10161e-09	2.9426e-07
Tox	479.933	-1.41812	0.239567	-5.91951	3.22902e-09	3.04514e-07
Cpeb1	1856.17	-0.504642	0.085331	-5.91394	3.34028e-09	3.13131e-07
Frmpd3	142.389	-1.7915	0.303191	-5.90882	3.44577e-09	3.21109e-07
Rimbp2	2251.5	-0.899293	0.152409	-5.90053	3.62337e-09	3.35674e-07
Baiap3	475.065	-3.66337	0.622423	-5.88566	3.96459e-09	3.65137e-07
Nr2e1	378.267	-5.03799	0.856316	-5.88334	4.02079e-09	3.68159e-07
5830416P10Rik	102.713	-1.69501	0.288743	-5.87033	4.34933e-09	3.9594e-07
Tmem91	180.945	-2.09414	0.357965	-5.85012	4.91214e-09	4.42065e-07
Nrsn1	10874.1	-0.758429	0.129836	-5.84143	5.17547e-09	4.61078e-07
Acan	164.313	-1.43795	0.246173	-5.84122	5.18196e-09	4.61078e-07
Begain	3352.55	-0.829692	0.142159	-5.83636	5.33544e-09	4.72066e-07
Nptx2	1073.47	-2.39189	0.410275	-5.82997	5.54374e-09	4.87756e-07
Cntnap5a	738.484	-1.12425	0.194179	-5.78975	7.04921e-09	6.13359e-07
Srl	424.697	-0.619645	0.107013	-5.79038	7.02272e-09	6.13359e-07
Rcor2	238.87	-1.16518	0.201341	-5.78711	7.16087e-09	6.19652e-07
Kctd16	481.054	-1.2382	0.214013	-5.78564	7.22356e-09	6.2166e-07
Tmem191c	1349.91	-0.63414	0.10978	-5.77647	7.62841e-09	6.52934e-07
Lrrc6	175.88	-1.73658	0.30109	-5.76765	8.0385e-09	6.80637e-07
Stac2	2986.96	-0.886358	0.15452	-5.73621	9.68184e-09	8.15397e-07
Slc25a29	545.767	-0.622339	0.108903	-5.71463	1.09941e-08	9.20986e-07
Stac	290.106	-0.870136	0.152289	-5.71373	1.10526e-08	9.20996e-07
Crtac1	1092.95	-1.40267	0.245891	-5.70443	1.16736e-08	9.67618e-07
Stc1	104.449	-1.95773	0.343451	-5.70015	1.19699e-08	9.86988e-07
Ywhah	29232.8	-0.437958	0.0768954	-5.6955	1.23009e-08	1.00376e-06
Entpd3	262.277	-1.36902	0.241779	-5.66226	1.49389e-08	1.21275e-06
Mrgpre	333.766	-1.15096	0.203517	-5.65535	1.55531e-08	1.25169e-06
Il1rapl2	111.438	-2.57137	0.454701	-5.65508	1.55776e-08	1.25169e-06
Gm13944	114.159	-1.03939	0.184097	-5.64586	1.64357e-08	1.31393e-06
Lrrc7	2355.92	-1.03248	0.183785	-5.61788	1.93316e-08	1.53765e-06
Emx2	305.375	-4.15311	0.74212	-5.59627	2.19008e-08	1.73324e-06
Nog	351.772	-0.724604	0.129645	-5.58912	2.28221e-08	1.79241e-06
Mmp17	4150.89	-0.682022	0.122036	-5.58871	2.2876e-08	1.79241e-06
Ablim2	3495.16	-0.401278	0.0719705	-5.57559	2.46695e-08	1.92337e-06
Atg9b	136.207	-1.48872	0.267078	-5.57411	2.48803e-08	1.93025e-06
Npas1	132.157	-2.8332	0.508893	-5.56738	2.58605e-08	1.99646e-06
Shox2	52.6511	-5.25555	0.945369	-5.55926	2.70924e-08	2.08135e-06
Sh3gl3	767.004	-0.767251	0.138108	-5.55542	2.76938e-08	2.11723e-06
Gm9866	688.459	-0.815686	0.147285	-5.53813	3.05715e-08	2.32594e-06
Neurl1b	1546.47	-1.24973	0.226474	-5.51819	3.42518e-08	2.59342e-06
Sema7a	8312.27	-0.445953	0.0808671	-5.51464	3.49502e-08	2.63364e-06
Miat	5238.07	-1.42807	0.259438	-5.50448	3.70261e-08	2.77678e-06
Susd2	254.453	-1.2799	0.233988	-5.46994	4.50182e-08	3.36015e-06
Akap2	4407.51	-0.310466	0.056839	-5.4622	4.70279e-08	3.47719e-06
Ephb6	2803.21	-0.578767	0.105957	-5.46227	4.70081e-08	3.47719e-06
6330403A02Rik	8144.83	-0.678585	0.124447	-5.45282	4.95779e-08	3.64861e-06
Slc27a2	143.34	-1.02393	0.188161	-5.44179	5.27492e-08	3.86394e-06
AI593442	6393.64	-0.6697	0.123323	-5.43047	5.62066e-08	4.09814e-06
Kcnj2	630.187	-1.08083	0.199234	-5.42496	5.79682e-08	4.16868e-06
D430019H16Rik	3671.46	-1.66734	0.307284	-5.42607	5.76093e-08	4.16868e-06
Mn1	1025.6	-1.25577	0.231454	-5.42555	5.77767e-08	4.16868e-06
Abr	17373	-0.374285	0.069165	-5.41148	6.25047e-08	4.47449e-06
Wee1	1071	-0.483709	0.0894082	-5.41012	6.29827e-08	4.4883e-06
Scn3a	1434.09	-1.70786	0.315953	-5.40543	6.46537e-08	4.58663e-06
Mttp	493.514	-0.485681	0.0900839	-5.39144	6.98968e-08	4.93634e-06
Pnma2	1994.53	-0.880114	0.163747	-5.37482	7.66581e-08	5.3813e-06
Gpc5	1180.53	-0.953195	0.177362	-5.3743	7.68806e-08	5.3813e-06
Ajap1	1626.75	-0.456775	0.0850276	-5.37208	7.78326e-08	5.42383e-06
Egfem1	118.074	-1.32413	0.246777	-5.36568	8.0644e-08	5.57045e-06
Rpp25	389.61	-0.972247	0.181493	-5.35695	8.46403e-08	5.82096e-06
Gria3	8600.49	-0.355002	0.0665102	-5.33756	9.42078e-08	6.42285e-06
St3gal1	746.574	-1.06428	0.199634	-5.33118	9.75791e-08	6.62403e-06
Sfrp5	75.0574	-2.46144	0.462446	-5.32265	1.02269e-07	6.91258e-06
Psd	11300	-0.463117	0.0871386	-5.31472	1.06822e-07	7.18949e-06
Faim2	20112.9	-0.30566	0.0575552	-5.31073	1.09187e-07	7.31736e-06
Grip2	823.249	-0.88567	0.166941	-5.3053	1.12485e-07	7.50648e-06
Fibcd1	281.031	-3.66073	0.690213	-5.30378	1.13432e-07	7.53773e-06
Lix1	1401.09	-0.767898	0.144855	-5.30117	1.15066e-07	7.61418e-06
1700001O22Rik	85.887	-1.3291	0.250822	-5.29898	1.16451e-07	7.67361e-06
Tac2	104.793	-2.87199	0.542732	-5.29172	1.21168e-07	7.95116e-06
Alk	177.556	-1.766	0.33417	-5.28474	1.25885e-07	8.19242e-06
Camkk1	3424.55	-0.478839	0.0906788	-5.28061	1.28754e-07	8.34464e-06
2900052N01Rik	1059.25	-1.99185	0.377523	-5.27611	1.31955e-07	8.51704e-06
Htr2a	496.37	-1.51946	0.289318	-5.25188	1.50556e-07	9.63863e-06
Sema3f	363.319	-1.14271	0.217639	-5.25047	1.51708e-07	9.67306e-06
Grm7	1748.72	-0.42707	0.0814674	-5.24221	1.58661e-07	1.00756e-05
Extl1	1608.55	-0.607786	0.116101	-5.235	1.64989e-07	1.03936e-05
Vstm5	301.56	-1.35456	0.259187	-5.2262	1.73031e-07	1.08568e-05
Irs4	36.3169	-4.51413	0.865952	-5.2129	1.85907e-07	1.16184e-05
Kcnv1	2922.5	-2.56402	0.492218	-5.20911	1.8975e-07	1.18118e-05
1110032F04Rik	325.216	-1.7291	0.332231	-5.2045	1.9452e-07	1.2061e-05
AW551984	281.238	-3.36346	0.646791	-5.20023	1.99045e-07	1.22932e-05
Galnt16	3815.24	-0.539864	0.103867	-5.19765	2.01829e-07	1.23681e-05
Grid2ip	1472.72	-0.667964	0.128503	-5.19805	2.01385e-07	1.23681e-05
Kcnb1	8179.56	-0.675422	0.130011	-5.19513	2.0458e-07	1.24881e-05
Grp	95.4127	-2.83779	0.54688	-5.18905	2.11371e-07	1.28529e-05
Dgkh	1217.18	-0.547094	0.105575	-5.18205	2.1946e-07	1.32495e-05
Nrsn2	2240.89	-0.702243	0.135536	-5.18124	2.20419e-07	1.32495e-05
Grm3	2310.36	-0.436306	0.0842078	-5.1813	2.20345e-07	1.32495e-05
Prkg2	405.197	-1.47294	0.284865	-5.17066	2.33266e-07	1.39685e-05
Shroom2	3056.38	-0.823638	0.159716	-5.15688	2.51104e-07	1.49797e-05
Cep76	3214.26	-0.540706	0.105012	-5.149	2.61873e-07	1.55047e-05
Chsy3	359.902	-1.54122	0.300128	-5.13522	2.8182e-07	1.66231e-05
Basp1	14520.4	-1.4676	0.286756	-5.11796	3.08855e-07	1.80824e-05
Chrm2	261.754	-1.31908	0.257776	-5.11717	3.1015e-07	1.80909e-05
Fndc9	57.5827	-3.20323	0.627277	-5.10656	3.28072e-07	1.90657e-05
Fam196a	296.662	-1.11557	0.218533	-5.10483	3.31094e-07	1.91706e-05
Slc6a7	1504.12	-0.924947	0.181396	-5.09905	3.41364e-07	1.96929e-05
Tnnt2	85.169	-2.36978	0.466569	-5.07916	3.79114e-07	2.17135e-05
Gabbr1	25956.7	-0.337144	0.0663782	-5.07914	3.79148e-07	2.17135e-05
Klhl1	302.908	-1.12487	0.222125	-5.06414	4.10257e-07	2.34099e-05
Adrbk2	4763.26	-0.364125	0.071953	-5.06059	4.17955e-07	2.37631e-05
Dclk3	1107.2	-0.834149	0.164876	-5.05924	4.20935e-07	2.38464e-05
Lor	69.2243	-1.84123	0.364327	-5.05378	4.33152e-07	2.44506e-05
Tchh	187.615	-0.898952	0.178114	-5.04705	4.48679e-07	2.52366e-05
Kcnh7	1298.11	-0.70917	0.140635	-5.04261	4.59224e-07	2.55559e-05
Ccdc63	99.499	-1.36561	0.270769	-5.04347	4.57171e-07	2.55559e-05
Mfge8	3779.44	-0.382091	0.0757701	-5.04277	4.58832e-07	2.55559e-05
Gpr149	45.6247	-3.39671	0.673819	-5.04098	4.63156e-07	2.55938e-05
Chrnb4	25.1688	-3.76867	0.747541	-5.04142	4.62088e-07	2.55938e-05
Trhr2	42.547	-6.20234	1.23196	-5.03452	4.79043e-07	2.63792e-05
Htr7	318.939	-1.56947	0.31188	-5.03228	4.84677e-07	2.65964e-05
Qrfpr	56.6271	-6.22768	1.23809	-5.03008	4.90264e-07	2.67488e-05
Trabd2b	642.473	-0.761591	0.151414	-5.02985	4.90851e-07	2.67488e-05
Thy1	21369.3	-0.510998	0.101773	-5.02096	5.14135e-07	2.79211e-05
Chrna4	844.421	-1.25742	0.250528	-5.0191	5.19129e-07	2.80954e-05
Emx2os	95.0889	-6.21685	1.24223	-5.00457	5.5987e-07	3.00995e-05
A730017C20Rik	1044.65	-1.0993	0.219765	-5.00214	5.66969e-07	3.03714e-05
E130012A19Rik	1592.39	-0.848112	0.169577	-5.00134	5.69335e-07	3.03948e-05
Mpped1	4660.8	-1.33286	0.266847	-4.99486	5.88781e-07	3.13267e-05
1500009C09Rik	3057.87	-0.454271	0.0910551	-4.98897	6.07014e-07	3.21881e-05
Elfn2	2426.1	-0.840304	0.16852	-4.98638	6.15211e-07	3.24045e-05
Insm1	181.676	-1.46361	0.293516	-4.98646	6.14961e-07	3.24045e-05
Pcdh7	5609.44	-0.820198	0.164878	-4.97458	6.53906e-07	3.43279e-05
Rasgrf1	10761	-0.395892	0.0795968	-4.97372	6.56806e-07	3.43656e-05
Kcnc3	19971.6	-0.403196	0.0810786	-4.97291	6.59551e-07	3.43949e-05
Agfg2	1419.79	-0.349345	0.0704135	-4.96133	7.00104e-07	3.62695e-05
Hes5	308.426	-1.12237	0.22629	-4.95988	7.05357e-07	3.64219e-05
Hrh2	156.461	-0.961812	0.194151	-4.95395	7.27229e-07	3.71855e-05
Daam2	3432.3	-0.63267	0.127787	-4.95096	7.38499e-07	3.75138e-05
Kcna4	686.23	-0.86394	0.174543	-4.94973	7.43178e-07	3.75138e-05
Cntn5	202.118	-1.02386	0.206804	-4.95088	7.3878e-07	3.75138e-05
Scn3b	3043.62	-1.42662	0.288194	-4.95021	7.41353e-07	3.75138e-05
Kcnt2	903.23	-1.33082	0.268922	-4.94871	7.47054e-07	3.7589e-05
Phlda3	617.357	-0.866186	0.175077	-4.94747	7.51838e-07	3.77092e-05
Cacng3	2330.33	-0.590792	0.119597	-4.93987	7.81743e-07	3.8961e-05
Rasd2	1832.89	-0.809226	0.164032	-4.93335	8.08319e-07	4.01584e-05
Bcl11b	1739.18	-1.88061	0.381568	-4.92863	8.28073e-07	4.08819e-05
Chst1	4889.69	-0.533355	0.108211	-4.92884	8.27187e-07	4.08819e-05
Lrfn5	1773.87	-0.644216	0.131031	-4.91652	8.80984e-07	4.33582e-05
Dos	8325.81	-0.488142	0.0993413	-4.91378	8.93355e-07	4.38301e-05
Tmem200c	581.2	-0.625779	0.127536	-4.90668	9.26301e-07	4.53053e-05
Smim1	322.965	-0.802396	0.16403	-4.89176	9.99391e-07	4.87288e-05
Timp2	9578.07	-0.920474	0.188264	-4.88926	1.01214e-06	4.91981e-05
Camk2n1	56225.4	-0.422263	0.0864311	-4.88554	1.03143e-06	4.99816e-05
Chrna3	44.8193	-3.5901	0.736962	-4.87148	1.10764e-06	5.3346e-05
Neto1	1658.46	-1.05453	0.217027	-4.85897	1.18e-06	5.66579e-05
Zfp804b	37.5968	-2.96138	0.609634	-4.85764	1.18793e-06	5.6765e-05
Cx3cl1	15965.7	-0.683238	0.140733	-4.85486	1.20472e-06	5.73206e-05
Lingo2	776.548	-0.822086	0.169429	-4.8521	1.22158e-06	5.7948e-05
Gsg1l	1904.3	-0.494244	0.102101	-4.84074	1.29353e-06	6.11767e-05
Ahi1	6375.92	-0.563979	0.116683	-4.83343	1.342e-06	6.32787e-05
Vamp1	9001.84	-0.692366	0.14332	-4.83092	1.35903e-06	6.38904e-05
2022-03-01	1114.09	-0.868596	0.179917	-4.82777	1.38071e-06	6.47167e-05
Npsr1	51.5279	-3.97165	0.822822	-4.82686	1.387e-06	6.48185e-05
Lancl1	5740.76	-0.305992	0.0634918	-4.8194	1.43993e-06	6.70933e-05
Egfl6	74.2542	-2.05762	0.427035	-4.81839	1.44724e-06	6.72348e-05
Prmt8	3542.13	-0.368186	0.0765966	-4.80682	1.53352e-06	7.06182e-05
Hlf	8231.16	-0.522768	0.108878	-4.80141	1.57552e-06	7.21305e-05
Col6a5	20.2716	-2.74802	0.574103	-4.78664	1.696e-06	7.71972e-05
Ndst4	325.664	-2.54445	0.531689	-4.78559	1.70484e-06	7.73763e-05
1810041L15Rik	1501.77	-0.754163	0.157638	-4.78416	1.71702e-06	7.77052e-05
Myo18b	55.6653	-2.13767	0.447072	-4.7815	1.73988e-06	7.82895e-05
Shisa9	2295.02	-0.494806	0.103723	-4.77045	1.83818e-06	8.22429e-05
B3gat1	6022.42	-0.514777	0.107984	-4.76717	1.86834e-06	8.33557e-05
Fam19a2	2005.49	-2.00127	0.419904	-4.76602	1.87901e-06	8.35947e-05
Col18a1	1437.34	-0.626017	0.131524	-4.75971	1.93874e-06	8.6009e-05
Kcnf1	3331.05	-1.01645	0.213869	-4.75268	2.00737e-06	8.8555e-05
Otx1	150.573	-1.86698	0.392984	-4.75077	2.02643e-06	8.9146e-05
Gabrg3	165.22	-1.30884	0.275646	-4.74827	2.05169e-06	9.00057e-05
Prkar2b	2369.51	-0.582728	0.122898	-4.74157	2.12071e-06	9.27754e-05
Dap	416.967	-0.512787	0.108317	-4.73415	2.19977e-06	9.58597e-05
Icmt	11836	-0.426854	0.0901712	-4.73381	2.20339e-06	9.58597e-05
Stap2	194.139	-0.882377	0.186518	-4.73079	2.23649e-06	9.70317e-05
Vwc2	244.774	-0.978789	0.207014	-4.72812	2.26606e-06	9.80446e-05
Rcan2	9757.53	-0.534722	0.113138	-4.72627	2.28682e-06	9.86718e-05
Gng13	2189.96	-0.842055	0.178195	-4.72546	2.29597e-06	9.87956e-05
Dcc	773.56	-0.962076	0.205521	-4.68116	2.85254e-06	0.000122078
Cyp46a1	4576.03	-0.397524	0.085391	-4.65534	3.23454e-06	0.000138051
P4ha3	97.5309	-1.87881	0.40371	-4.65385	3.258e-06	0.000138451
Map7d2	8246.46	-0.29358	0.0630862	-4.65362	3.2615e-06	0.000138451
Hapln1	877.362	-0.747665	0.160827	-4.64888	3.33745e-06	0.000141294
Rgs8	25983.4	-0.624781	0.134724	-4.63751	3.52635e-06	0.000148892
D130043K22Rik	1274.32	-0.563316	0.121597	-4.63263	3.61054e-06	0.000152039
Gpr165	426.765	-1.22328	0.264301	-4.62835	3.68582e-06	0.000154795
Matk	2705.05	-0.482648	0.104326	-4.62636	3.72154e-06	0.000155834
Vstm2a	3532.19	-0.70582	0.152581	-4.62587	3.73036e-06	0.000155834
Ecel1	83.5077	-2.22118	0.480384	-4.62376	3.76842e-06	0.000156593
P4ha2	218.913	-0.65071	0.140719	-4.62419	3.76072e-06	0.000156593
Magel2	58.5986	-2.10259	0.455201	-4.61904	3.85526e-06	0.00015978
Lypd6b	378.973	-1.89065	0.409661	-4.61516	3.92794e-06	0.000162365
Hsf4	443.687	-1.09807	0.238279	-4.60834	4.05906e-06	0.000167346
Plxdc1	1705.27	-0.520551	0.112983	-4.60732	4.07889e-06	0.000167725
Strn3	6051.83	-0.280834	0.0609791	-4.60541	4.11656e-06	0.000168394
Acat3	86.1071	-1.17993	0.256383	-4.60222	4.18013e-06	0.000170552
Crebl2	1580.9	-0.314636	0.0683803	-4.60127	4.19921e-06	0.000170887
Epha10	933.154	-0.984589	0.214242	-4.59568	4.31331e-06	0.000175078
Celf6	572.335	-0.56676	0.123377	-4.59372	4.35419e-06	0.000176283
Rspo1	197.028	-1.67518	0.364917	-4.59057	4.42039e-06	0.000178505
Esr1	71.9279	-1.99753	0.436194	-4.57944	4.66216e-06	0.000187606
Sox14	15.8407	-3.74497	0.817837	-4.57911	4.66959e-06	0.000187606
Rhbdl3	526.585	-0.784891	0.171545	-4.57542	4.75259e-06	0.000190454
2310022B05Rik	2924.24	-0.483334	0.105953	-4.56179	5.07198e-06	0.000202734
Il33	1789.67	-0.694872	0.152362	-4.56065	5.09944e-06	0.000202806
Pnoc	167.26	-0.877859	0.19296	-4.54945	5.37869e-06	0.000213373
Col25a1	1564.17	-1.99471	0.43861	-4.5478	5.42099e-06	0.000214236
Sparcl1	79127.4	-0.322372	0.0708893	-4.54754	5.42765e-06	0.000214236
Ptgs1	429.508	-0.547455	0.120401	-4.54691	5.44389e-06	0.000214339
Hap1	4303.98	-0.788552	0.17361	-4.5421	5.56968e-06	0.000218745
Ipo5	6306.86	-0.319762	0.0704413	-4.53942	5.64103e-06	0.000220996
Padi2	980.507	-0.631882	0.13939	-4.5332	5.80967e-06	0.000227038
Dnah1	166.065	-1.22832	0.271402	-4.52582	6.0162e-06	0.000233949
Fads1	8632.15	-0.336502	0.0745029	-4.51663	6.28307e-06	0.000242551
Chil1	274.093	-0.788783	0.174708	-4.51487	6.33569e-06	0.000243963
Etnppl	1624.56	-0.571314	0.126564	-4.51404	6.3603e-06	0.000244313
Fgf1	4403.17	-0.391502	0.0867826	-4.5113	6.44307e-06	0.00024689
Sema4a	1080.41	-0.6863	0.152276	-4.50693	6.57709e-06	0.000251414
Scn7a	233.655	-1.38065	0.306479	-4.50486	6.6416e-06	0.000253265
1700001L19Rik	289.637	-1.40018	0.311718	-4.49183	7.06142e-06	0.000268624
Asb16	27.9403	-2.11036	0.470205	-4.48818	7.1834e-06	0.000271951
Ptprm	2789.85	-0.388599	0.0865737	-4.48865	7.16747e-06	0.000271951
Slc25a25	2602.61	-0.326481	0.0727642	-4.48684	7.22867e-06	0.000273008
5330417C22Rik	613.199	-0.845249	0.188467	-4.48486	7.29614e-06	0.000274897
Gm10421	14.4271	-5.79989	1.29393	-4.48238	7.38147e-06	0.00027613
Car2	6654.33	-0.383629	0.0855772	-4.48284	7.36568e-06	0.00027613
Ly6h	3411.3	-0.806551	0.180004	-4.48074	7.43861e-06	0.000277608
Slc6a11	6314.39	-1.58173	0.354229	-4.46526	7.99708e-06	0.000296344
Gm5083	292.519	-0.887637	0.199073	-4.45885	8.24013e-06	0.00030321
Adam33	107.514	-2.29297	0.514416	-4.45742	8.29518e-06	0.000304524
Psd2	6063.06	-0.361326	0.0810922	-4.45574	8.36042e-06	0.000305771
Pcdhgc5	2581.6	-0.57426	0.128887	-4.45555	8.36797e-06	0.000305771
Vgll3	66.8216	-1.51443	0.340316	-4.45006	8.58446e-06	0.000312955
Serpina3n	403.692	-1.01885	0.229121	-4.44678	8.71655e-06	0.000316924
4932411E22Rik	106.991	-1.43399	0.322692	-4.44383	8.8372e-06	0.000319947
Dzank1	11073.7	-0.497484	0.112131	-4.43662	9.13831e-06	0.000327834
Nxph1	1070.23	-0.555796	0.12525	-4.43748	9.10166e-06	0.000327834
Ier5l	299.107	-1.09972	0.247912	-4.43595	9.16675e-06	0.000328107
Pcsk2	12505.2	-0.301572	0.0685517	-4.39919	1.08655e-05	0.000385406
Col24a1	157.745	-1.78425	0.406231	-4.39222	1.12201e-05	0.000396617
Nat8l	15895.6	-0.389714	0.088733	-4.39199	1.12319e-05	0.000396617
Klc2	9578.74	-0.251626	0.0575036	-4.37584	1.20967e-05	0.0004243
Gal3st1	353.979	-0.704368	0.160989	-4.37525	1.21294e-05	0.000424501
Oprk1	195.391	-1.81088	0.413987	-4.37423	1.2186e-05	0.000425538
Pcdh8	837.385	-0.878104	0.200806	-4.3729	1.22606e-05	0.000427195
Fgf7	278.509	-0.607383	0.139242	-4.36207	1.28838e-05	0.00044792
Sbk1	12350.6	-0.566157	0.12986	-4.35974	1.30215e-05	0.000450717
Pitpnm3	4819.39	-0.343497	0.0788248	-4.35773	1.3142e-05	0.00045389
Fgf11	1458	-0.494454	0.113516	-4.35582	1.32567e-05	0.000456847
Fxyd7	1344.39	-0.838846	0.192645	-4.35437	1.33453e-05	0.000458896
Rab27b	1279.96	-0.834936	0.191843	-4.35219	1.34785e-05	0.000462467
Gm13446	128.79	-1.28398	0.295287	-4.34824	1.37237e-05	0.000468839
Fam65b	1743.07	-0.522379	0.12018	-4.34663	1.38247e-05	0.000471267
Erich5	12.8629	-2.21958	0.511328	-4.3408	1.41963e-05	0.000482888
Kank4	370.962	-0.678158	0.15628	-4.33938	1.42885e-05	0.000484979
Ogfod1	4970.94	-0.364242	0.0840458	-4.33385	1.46522e-05	0.000496252
Aldh1l1	2194.9	-0.267756	0.0618058	-4.33222	1.47616e-05	0.000497818
C1ql3	4539.21	-0.508609	0.117435	-4.331	1.48432e-05	0.000498387
Agbl4	216.367	-0.892369	0.206025	-4.33136	1.48191e-05	0.000498387
Tmem130	5551.65	-0.573391	0.132406	-4.33055	1.48734e-05	0.000498387
Htr4	40.0739	-2.26733	0.523633	-4.32999	1.49116e-05	0.000498605
Tpd52l1	487.773	-0.744124	0.172099	-4.32382	1.5335e-05	0.000509515
Rgs6	1369.87	-0.414926	0.095953	-4.32426	1.53043e-05	0.000509515
Slc20a1	6614.73	-0.363569	0.0841806	-4.31891	1.568e-05	0.000518791
Stmn1	8502.15	-0.51891	0.120305	-4.31329	1.60844e-05	0.000531056
Ntsr2	2909.3	-0.400842	0.0930794	-4.30645	1.65897e-05	0.000546594
Mcf2	277.771	-0.992399	0.230739	-4.30096	1.70058e-05	0.000559131
1500009L16Rik	406.18	-0.628001	0.146071	-4.29929	1.71344e-05	0.000562187
Gdf11	469.218	-0.591798	0.138197	-4.28227	1.84997e-05	0.00060572
Gabra5	1459.63	-2.26477	0.529249	-4.27921	1.87559e-05	0.000610303
Mal	5672.02	-0.560323	0.131174	-4.27161	1.94068e-05	0.000630182
Tspan14	1361.48	-0.331509	0.0777127	-4.26583	1.99159e-05	0.000645383
Adam23	9795.16	-0.318151	0.0747758	-4.25474	2.09294e-05	0.000675443
Slc14a1	936.639	-0.390791	0.0920171	-4.24695	2.16704e-05	0.000697929
Slitrk6	42.3258	-2.13183	0.503066	-4.23767	2.25851e-05	0.000725905
Pigs	2060.65	-0.316769	0.074842	-4.23251	2.31096e-05	0.000741249
Trhr	96.7765	-1.92039	0.454117	-4.22883	2.34907e-05	0.000751941
Tppp	18600	-0.327423	0.0774625	-4.22686	2.36976e-05	0.000757026
Tmbim1	1398.52	-0.334435	0.0792021	-4.22255	2.41556e-05	0.000770096
Prph	31.7287	-2.5703	0.611368	-4.20418	2.62033e-05	0.000830333
Kcnk4	283.312	-1.10928	0.264804	-4.18908	2.80086e-05	0.000882859
Rgs10	690.456	-0.602585	0.143852	-4.18892	2.8029e-05	0.000882859
Scn9a	64.5258	-1.77203	0.423202	-4.1872	2.82419e-05	0.000887447
Tmie	171.859	-0.641964	0.153329	-4.18683	2.82874e-05	0.000887447
Foxp2	774.439	-0.84364	0.2016	-4.18473	2.85506e-05	0.000893924
Susd1	286.551	-0.910005	0.217511	-4.18373	2.86769e-05	0.000896097
Gm9962	59.2788	-2.05571	0.491502	-4.1825	2.88318e-05	0.000899152
Gfod2	692.543	-0.333502	0.0797847	-4.18003	2.91473e-05	0.000907196
Tmem132b	4012.57	-0.681448	0.163043	-4.17956	2.92068e-05	0.000907253
Ankrd45	2454.68	-0.374533	0.0896206	-4.1791	2.92669e-05	0.000907332
Fads2	2931.13	-0.340634	0.081648	-4.17198	3.01965e-05	0.000930783
Npnt	781.964	-0.66634	0.159736	-4.1715	3.02598e-05	0.000930783
Hcrtr1	48.8923	-1.91946	0.460033	-4.17243	3.01366e-05	0.000930783
Fbxo2	1769.94	-0.496546	0.119032	-4.17153	3.02561e-05	0.000930783
Ddit4l	565.776	-1.0354	0.248286	-4.1702	3.04334e-05	0.000934224
2210408F21Rik	231.9	-0.786368	0.188588	-4.16977	3.04903e-05	0.000934224
Ccdc85a	2592.55	-0.530247	0.127351	-4.16367	3.13176e-05	0.000954005
Tmem158	1175.84	-0.368717	0.0885785	-4.1626	3.14648e-05	0.00095664
Ttn	33.4906	-2.18588	0.526034	-4.15541	3.24711e-05	0.000985331
Kcnab2	12356.3	-0.512084	0.123289	-4.15354	3.27374e-05	0.000991503
Arhgap36	45.9179	-2.69997	0.651224	-4.146	3.38339e-05	0.00102275
Tcap	68.3868	-2.127	0.51372	-4.14039	3.46709e-05	0.00104205
Oprl1	1194.23	-0.816766	0.197545	-4.13457	3.55619e-05	0.00106679
Zcchc12	1600.97	-1.54266	0.37345	-4.13083	3.61457e-05	0.00108224
Pam	6561.08	-0.606966	0.147247	-4.12209	3.75448e-05	0.0011213
Rnf157	10079.8	-0.411043	0.0997242	-4.1218	3.75926e-05	0.0011213
Nmral1	294.871	-0.544516	0.132419	-4.11208	3.92109e-05	0.00116296
Mpp5	2059.02	-0.342496	0.0833128	-4.11096	3.9402e-05	0.00116424
C530008M17Rik	2221.06	-0.572556	0.139263	-4.11133	3.93385e-05	0.00116424
Ppp1r16b	9284.35	-0.558278	0.136122	-4.10132	4.10804e-05	0.00121156
Fst	71.6559	-2.24193	0.546893	-4.09939	4.14241e-05	0.00121942
Col11a1	323.16	-1.16432	0.284128	-4.09785	4.16998e-05	0.00122524
Samd5	291.774	-0.613096	0.149842	-4.09161	4.28382e-05	0.00125054
Arhgdig	1218.89	-1.41227	0.345091	-4.09245	4.26842e-05	0.00125054
Opalin	480.795	-0.928221	0.226872	-4.0914	4.28785e-05	0.00125054
Dbndd1	565.094	-0.361625	0.0883773	-4.09183	4.27988e-05	0.00125054
Asah2	832.566	-0.754572	0.184846	-4.08216	4.46191e-05	0.0012989
Pcdh19	1439.06	-0.761036	0.18652	-4.08018	4.50004e-05	0.00130758
St6gal2	372.31	-0.800619	0.196432	-4.0758	4.58559e-05	0.00132999
Krt77	85.4953	-4.34641	1.06944	-4.0642	4.81973e-05	0.00139533
Id4	2884.2	-0.437329	0.107648	-4.06256	4.85372e-05	0.00140098
Kcng2	131.71	-1.0676	0.2628	-4.0624	4.85704e-05	0.00140098
Ncdn	35205.1	-0.365966	0.0902752	-4.05389	5.03719e-05	0.00144764
Gpr83	277.482	-1.20056	0.296207	-4.05309	5.05446e-05	0.00144996
Kcnh8	22.6703	-2.14566	0.529689	-4.05079	5.10457e-05	0.00146167
Il1rap	1185.19	-0.374957	0.0927488	-4.04271	5.28366e-05	0.00150474
Car7	994.003	-0.475946	0.117723	-4.04293	5.2788e-05	0.00150474
Scn1a	11483.6	-0.298023	0.0737533	-4.04082	5.32656e-05	0.00151422
Galnt14	363.266	-1.12243	0.278085	-4.0363	5.43011e-05	0.00154088
Kcnj16	1524.84	-0.3472	0.0861084	-4.03213	5.52736e-05	0.00156284
Rtkn	1226.14	-0.453607	0.112497	-4.03218	5.52615e-05	0.00156284
Nkd2	77.5886	-1.33787	0.331922	-4.03068	5.56156e-05	0.0015697
Zmat4	1757.24	-0.725738	0.180181	-4.02782	5.62964e-05	0.00158607
Bean1	631.344	-0.41963	0.104422	-4.01859	5.85467e-05	0.00164652
Tmem200b	520.499	-0.545548	0.135831	-4.01638	5.90981e-05	0.00165611
Fbln7	146.089	-0.602488	0.150037	-4.01559	5.92978e-05	0.00165876
Tomm34	2465.74	-0.278733	0.0694492	-4.01349	5.98278e-05	0.00167062
Prickle2	6943.52	-0.451749	0.112631	-4.01088	6.04922e-05	0.00168618
Stx1a	5678.94	-1.19951	0.299439	-4.00585	6.17947e-05	0.00171944
Chrnb3	65.7284	-1.92993	0.481868	-4.00511	6.19888e-05	0.0017218
Pou3f2	1752.57	-0.44622	0.111517	-4.00135	6.29833e-05	0.00174328
Kcnab3	2307.01	-0.573395	0.14344	-3.99745	6.40283e-05	0.0017688
Rnd2	1531.67	-0.467598	0.116997	-3.99666	6.42424e-05	0.0017688
Cyp51	2676.93	-0.284217	0.0712415	-3.98948	6.62177e-05	0.00182
Ppm1f	2576	-0.296192	0.0742654	-3.98828	6.65529e-05	0.00182603
Galntl6	584.37	-0.878376	0.220393	-3.98551	6.73368e-05	0.00184432
Olfml1	469.722	-0.46396	0.116491	-3.9828	6.81076e-05	0.0018622
Gpr61	435.064	-0.560502	0.14076	-3.98196	6.83498e-05	0.00186558
Rxra	1071.16	-0.408919	0.102782	-3.97852	6.9346e-05	0.0018895
P2ry12	1294.13	-0.483282	0.121527	-3.97673	6.98684e-05	0.00190044
D430036J16Rik	150.865	-0.641768	0.161412	-3.97595	7.0099e-05	0.00190343
Inpp5a	9057.5	-0.334828	0.0842309	-3.97513	7.03423e-05	0.00190675
Rgs14	836.984	-1.60217	0.40375	-3.96821	7.24142e-05	0.00195618
Susd4	3158.24	-0.252184	0.0636095	-3.96456	7.35304e-05	0.00197954
Scn4b	4562.7	-0.775214	0.19558	-3.96366	7.381e-05	0.00198367
BC030500	186.42	-1.07293	0.270825	-3.96172	7.44113e-05	0.00199643
Kcns3	180.492	-0.975801	0.246355	-3.96095	7.46509e-05	0.00199945
Npy2r	109.274	-1.73308	0.437751	-3.95906	7.5245e-05	0.00200853
Lpl	419.807	-0.902209	0.227935	-3.95818	7.55231e-05	0.00201254
1110015O18Rik	35.5505	-1.60622	0.405969	-3.95651	7.60539e-05	0.00201985
Rgag4	793.382	-0.587261	0.148423	-3.95667	7.60012e-05	0.00201985
Gamt	258.022	-0.608293	0.153808	-3.95489	7.65705e-05	0.00202673
Synm	1477.39	-0.425448	0.108056	-3.93729	8.24071e-05	0.00216305
Chrna6	19.4301	-2.49001	0.632715	-3.93544	8.30437e-05	0.00217613
Bcl11a	2494.47	-0.381445	0.0972106	-3.92391	8.71244e-05	0.0022759
Cplx3	211.53	-1.49882	0.381975	-3.92386	8.71401e-05	0.0022759
Creg1	1747.4	-0.409036	0.1043	-3.92173	8.79137e-05	0.00229231
Mlph	189.737	-0.59412	0.151835	-3.91294	9.11786e-05	0.00236959
Rgl1	3200.26	-0.426584	0.109054	-3.91167	9.16598e-05	0.00237817
Fam117a	345.014	-0.615809	0.157877	-3.90056	9.59695e-05	0.00248181
Clu	23125.3	-0.310755	0.0797289	-3.89764	9.71334e-05	0.00250369
Camk2g	9403.58	-0.396893	0.101842	-3.89716	9.73281e-05	0.00250461
Vcam1	955.714	-0.350507	0.089952	-3.8966	9.75537e-05	0.00250632
Prss12	391.626	-1.42675	0.366237	-3.89571	9.79096e-05	0.00251136
Tmeff1	2521.08	-0.59488	0.153329	-3.87976	0.000104559	0.00267756
Homer3	5519.39	-0.382627	0.0986666	-3.87797	0.00010533	0.00269291
Pitx2	4.89169	-6.62462	1.70938	-3.87545	0.000106428	0.0027166
2700069I18Rik	17.2084	-2.65679	0.685808	-3.87395	0.000107084	0.00272891
AK129341	1220.05	-0.337924	0.0872618	-3.87253	0.000107713	0.00274051
Ssbp2	3829.07	-0.331833	0.0857227	-3.871	0.000108388	0.00275323
Cntnap3	201.62	-1.80828	0.467697	-3.86635	0.000110475	0.00280135
Pak3	4446.86	-0.669504	0.173183	-3.86586	0.000110697	0.00280135
Ildr2	5723.14	-0.717834	0.185799	-3.8635	0.000111775	0.00280257
F2r	260.6	-0.553142	0.143163	-3.86373	0.000111671	0.00280257
Kctd4	669.664	-0.739478	0.191339	-3.86475	0.000111205	0.00280257
Vgf	5371.91	-0.612776	0.158585	-3.86403	0.000111532	0.00280257
Cdh13	1120.92	-0.704131	0.182268	-3.86315	0.000111932	0.00280257
Plekhg5	1479	-0.588708	0.152476	-3.86098	0.000112934	0.00282317
B930025P03Rik	20.3154	-1.8412	0.477003	-3.85992	0.000113423	0.0028309
Slc22a3	55.4732	-1.7338	0.449251	-3.8593	0.000113712	0.00283364
Cdhr1	388.499	-3.07996	0.800878	-3.84573	0.000120193	0.00297161
Syne2	2145.42	-0.307451	0.0799696	-3.8446	0.000120748	0.00298065
Fkbp2	1454.53	-0.250845	0.0652922	-3.84188	0.000122097	0.00300924
Slc6a6	6009.98	-0.413485	0.107745	-3.83763	0.000124227	0.00305219
A230077H06Rik	80.9079	-1.42126	0.370317	-3.83795	0.000124067	0.00305219
Tmem150c	1358.08	-0.346373	0.0902716	-3.83701	0.00012454	0.0030551
Arhgef33	3512.66	-0.477658	0.124522	-3.83594	0.000125083	0.00305891
Rin1	1009.22	-0.725824	0.189213	-3.83602	0.000125046	0.00305891
Sntg1	1181.54	-0.56672	0.147892	-3.83198	0.000127119	0.00310386
Kif5a	96921.3	-0.334999	0.0875412	-3.82676	0.000129841	0.00316542
Rgs16	379.635	-0.481505	0.125925	-3.82374	0.00013144	0.0031798
Ttll5	3234.11	-0.359549	0.0940304	-3.82376	0.000131434	0.0031798
Mchr1	342.621	-2.13453	0.558043	-3.82503	0.000130758	0.0031798
Dpcd	988.523	-0.372443	0.0973831	-3.82451	0.00013103	0.0031798
Gabra3	4822.49	-1.07713	0.281667	-3.82412	0.000131242	0.0031798
Tprkb	2897.45	-0.258862	0.0677366	-3.8216	0.000132587	0.00320263
Dhcr24	3696	-0.356832	0.0934623	-3.81793	0.000134577	0.00324571
Tspan11	596.887	-0.552574	0.144803	-3.81603	0.000135615	0.00326574
Tmem176a	256.775	-0.7	0.183813	-3.80822	0.00013997	0.00336547
Aldh1b1	177.662	-0.892289	0.234633	-3.80291	0.000143006	0.00342801
Efcc1	151.004	-0.889756	0.234062	-3.80136	0.000143901	0.00344423
Cldn11	3963.51	-0.62392	0.164226	-3.79915	0.000145194	0.00346499
Grik4	741.753	-0.363894	0.0957837	-3.79912	0.000145209	0.00346499
Pgam2	42.3692	-4.18156	1.10081	-3.79862	0.000145502	0.00346673
Msmo1	2728.1	-0.420036	0.11068	-3.79505	0.000147613	0.00351172
Zdhhc15	333.728	-0.521695	0.137491	-3.79438	0.00014801	0.00351585
Rgs4	10272.6	-0.732022	0.192978	-3.79329	0.000148664	0.00352608
Chd5	7896.57	-0.612495	0.161695	-3.78797	0.000151884	0.00359702
Cpne4	2052.25	-1.30579	0.345134	-3.78343	0.000154683	0.00365232
6720489N17Rik	114.841	-0.753562	0.199249	-3.78201	0.000155564	0.00366764
Kcnj14	35.3842	-2.00487	0.530717	-3.77766	0.000158309	0.00371567
Tpgs2	2009.68	-0.286468	0.0758876	-3.7749	0.000160074	0.0037515
Kcns1	563.004	-0.699673	0.185455	-3.77273	0.000161472	0.00377863
Lrrc55	643.906	-0.840821	0.222952	-3.7713	0.000162398	0.00379468
Rorb	2245.15	-0.514982	0.137035	-3.75802	0.000171261	0.00398992
Slc27a3	78.4925	-0.948651	0.2526	-3.75555	0.000172962	0.0040236
Ccdc184	852.725	-0.525979	0.140273	-3.74969	0.000177057	0.00410143
Ido2	38.7459	-2.07312	0.553097	-3.7482	0.000178105	0.00411892
Syt7	14056.7	-0.293357	0.0783166	-3.74578	0.000179835	0.00415281
Hspa12a	8641.85	-0.328108	0.0876427	-3.74371	0.000181326	0.00418112
Pdlim2	335.327	-0.687205	0.183635	-3.74222	0.000182399	0.0041997
Reps2	11054.4	-0.298886	0.0799143	-3.74008	0.000183963	0.00422954
Zfp467	1161.56	-0.323226	0.0866086	-3.73203	0.000189945	0.00435079
Mrap2	210.693	-0.957318	0.256525	-3.73187	0.000190066	0.00435079
Kcna6	4151.77	-0.37365	0.10028	-3.72608	0.000194483	0.00443258
Nsmf	9626.89	-0.324019	0.0869838	-3.72504	0.000195281	0.00444434
Reep2	5120.43	-0.255667	0.0686414	-3.72468	0.000195563	0.00444434
Gm16532	427.057	-0.961717	0.258684	-3.71773	0.000201019	0.00454863
Grhpr	601.994	-0.467975	0.12598	-3.71467	0.000203469	0.00459747
Trpc3	2893.18	-0.411311	0.110752	-3.71381	0.000204163	0.00460653
Ccdc109b	49.4275	-1.28687	0.34668	-3.71199	0.000205636	0.00462652
Bmp3	349.583	-2.21586	0.596946	-3.712	0.000205632	0.00462652
Paqr6	497.199	-0.477379	0.12879	-3.70664	0.000210028	0.00471858
Mc4r	36.9775	-2.56106	0.692355	-3.69906	0.000216398	0.00485478
Slc35f4	327.112	-0.858153	0.232373	-3.693	0.000221624	0.00496494
Dok6	454.586	-0.740956	0.201325	-3.6804	0.000232872	0.00520213
Mme	360.053	-0.959476	0.260973	-3.67653	0.000236427	0.00527407
Fam21	9533.14	-0.312982	0.0852725	-3.67038	0.000242195	0.00539508
Tnfrsf21	3115.74	-0.495083	0.134916	-3.66956	0.000242968	0.00540466
B230216N24Rik	171.544	-1.24001	0.338031	-3.66834	0.000244128	0.0054228
Rapgef5	2111.87	-0.429983	0.117404	-3.66243	0.000249835	0.00554176
Gpr64	53.4787	-1.56521	0.427494	-3.66135	0.000250889	0.00555733
Shisa7	3134.54	-0.580071	0.15852	-3.65928	0.00025292	0.00559444
Hdac11	6115.56	-0.273832	0.0748446	-3.65868	0.000253521	0.00559986
Gm20063	97.2987	-1.40034	0.383231	-3.65404	0.000258148	0.00569409
Bcar1	3157.89	-0.321955	0.0881878	-3.65079	0.000261436	0.00575049
Pdzrn3	1017.2	-0.458183	0.125817	-3.64167	0.000270879	0.00594161
Far2	658.766	-0.46251	0.127156	-3.63734	0.000275467	0.00602547
Adcy2	4500.28	-0.363551	0.100157	-3.62982	0.000283622	0.00618665
CK137956	47.5657	-1.59576	0.439739	-3.62888	0.00028465	0.00620048
Htr5b	24.9104	-2.45825	0.677625	-3.62775	0.000285905	0.00621922
Nxph3	538.429	-0.740823	0.204374	-3.62483	0.000289153	0.00627254
Arhgap32	13651.1	-0.298449	0.0823838	-3.62267	0.00029158	0.00630781
1700003E16Rik	624.049	-0.620588	0.171692	-3.61453	0.000300889	0.00648249
Pmepa1	1607.76	-0.376391	0.104149	-3.61397	0.000301544	0.00648311
Gpr63	897.389	-0.602923	0.166839	-3.6138	0.000301741	0.00648311
Snrpn	61.0625	-1.02077	0.282594	-3.61213	0.000303691	0.00651612
Gskip	1359.56	-0.364054	0.101154	-3.599	0.000319447	0.00681704
Chst8	596.741	-0.383053	0.106446	-3.59857	0.000319975	0.00681906
A230065H16Rik	14.795	-3.01967	0.839472	-3.59711	0.000321775	0.0068297
Rmdn3	2819.82	-0.340678	0.0947002	-3.59744	0.000321363	0.0068297
Pnkd	5803.46	-0.410875	0.114255	-3.59613	0.000322987	0.00684619
Ppp1r3c	1439.02	-0.368535	0.102511	-3.59509	0.000324279	0.00686435
Cdk18	884.706	-0.587661	0.163515	-3.59393	0.000325729	0.00688577
Cdh6	485.635	-0.842348	0.234656	-3.58972	0.000331033	0.00697057
Mafa	21.6963	-2.2693	0.632125	-3.58996	0.000330731	0.00697057
Ppapdc2	2518.55	-0.282327	0.0786493	-3.58969	0.000331068	0.00697057
2010204K13Rik	258.475	-0.964175	0.268688	-3.58845	0.000332647	0.00699447
Pdzrn4	221.436	-0.836685	0.233577	-3.58206	0.000340896	0.00714883
Ostn	13.7136	-1.82942	0.512001	-3.57307	0.000352814	0.00737912
Vwa1	937.262	-0.340115	0.0952333	-3.57139	0.000355094	0.00741629
Pld2	599.97	-0.349314	0.097895	-3.56825	0.000359378	0.00748657
Islr2	1512.62	-0.740171	0.208042	-3.55779	0.000373993	0.00778073
Entpd6	1360.68	-0.361901	0.101852	-3.55319	0.000380585	0.00789701
Per3	1275.21	-0.443217	0.124846	-3.5501	0.000385087	0.00796944
Ptpn5	3941.39	-0.622308	0.175312	-3.54972	0.00038564	0.00797039
Sstr2	339.434	-1.0731	0.30235	-3.54921	0.000386392	0.00797547
Nek7	2522.96	-0.293229	0.0826263	-3.54886	0.000386902	0.00797554
Kcng4	2970.46	-0.362996	0.102358	-3.54635	0.000390612	0.00804149
Mxra7	402.22	-0.361072	0.10184	-3.54547	0.000391908	0.00805766
Pou6f2	24.8485	-2.32152	0.654926	-3.54471	0.000393051	0.00807061
Tef	10817.1	-0.33568	0.0949466	-3.53546	0.000407062	0.00832574
Tshz2	886.1	-1.17796	0.333397	-3.53319	0.000410584	0.00838688
Hhipl1	131.165	-0.901617	0.25577	-3.5251	0.000423319	0.00861351
Hsd3b7	316.91	-0.447256	0.126913	-3.52413	0.000424883	0.00863417
Neu2	141.576	-0.773338	0.219465	-3.52375	0.000425485	0.00863525
4930447C04Rik	167.051	-0.97055	0.275525	-3.52255	0.000427423	0.00866342
Nefl	11100.9	-0.441469	0.125373	-3.52125	0.000429511	0.00869457
Sh2d5	1775.25	-0.265312	0.0753631	-3.52044	0.000430825	0.00870996
Tmem119	504.421	-0.513548	0.145937	-3.51897	0.000433221	0.00874718
2810459M11Rik	440.903	-0.401498	0.114181	-3.51632	0.000437579	0.00882017
Cox6a2	107.986	-1.00804	0.286694	-3.51609	0.000437956	0.00882017
Pnma1	121.567	-1.10532	0.314544	-3.51402	0.000441377	0.00887772
6430584L05Rik	94.5132	-1.24122	0.353474	-3.51147	0.000445628	0.00895177
Hpca	9782.75	-0.437516	0.12461	-3.51109	0.000446279	0.00895343
Kcnq2	4850.39	-0.424287	0.120859	-3.51061	0.000447088	0.00895825
Tmem200a	560.398	-0.635444	0.181298	-3.50497	0.000456666	0.00911537
Impact	10436	-0.378083	0.108366	-3.48894	0.000484933	0.00964294
Slc1a6	3227.15	-0.298834	0.0857749	-3.48393	0.000494108	0.00978866
Cox6b2	88.3823	-0.688525	0.197629	-3.48392	0.000494126	0.00978866
Clvs2	981.521	-0.559923	0.160752	-3.48316	0.00049554	0.00980434
Fam217b	1366.35	-0.403939	0.116107	-3.47901	0.000503264	0.00994468
Mroh5	39.2453	-1.07485	0.309262	-3.47552	0.000509859	0.010036
H2-Q2	6.45303	-4.32565	1.2456	-3.47275	0.00051516	0.0101163
2900055J20Rik	196.485	-0.944123	0.272044	-3.47048	0.000519528	0.010164
Pex5l	5673.06	-0.48869	0.140891	-3.46856	0.000523251	0.0102242
Spire2	641.315	-0.304362	0.0877678	-3.46781	0.000524721	0.0102402
Nkain4	813.483	-0.320732	0.092571	-3.46472	0.000530789	0.010333
Marcksl1	1589.2	-0.591311	0.170657	-3.46491	0.000530407	0.010333
Maob	1017.95	-0.285202	0.0823357	-3.46389	0.000532422	0.010352
Cbln4	463.385	-1.60509	0.464081	-3.45864	0.000542911	0.010517
Pcdhgc4	658.033	-0.309383	0.0894639	-3.45818	0.000543832	0.0105219
Cys1	197.637	-0.64841	0.18766	-3.45525	0.000549788	0.0106241
Ly6g6e	40.2892	-1.24689	0.361573	-3.44852	0.000563671	0.0108259
D930020B18Rik	19.9423	-1.47669	0.428871	-3.44319	0.000574885	0.0110011
Cntnap5b	1225.61	-0.419151	0.121894	-3.43866	0.000584604	0.0111464
Pcdh15	570.831	-0.527764	0.15355	-3.43707	0.00058804	0.0111848
Arhgap24	248.9	-0.871408	0.253863	-3.43259	0.000597842	0.0113166
Gldn	40.6556	-2.10092	0.612581	-3.42961	0.000604439	0.0114277
Amz1	267.378	-0.62545	0.18251	-3.42693	0.000610437	0.0115273
Nkain2	1516.41	-0.571453	0.166797	-3.42603	0.000612463	0.0115517
Pitpnc1	3033.97	-0.387887	0.113261	-3.42471	0.00061545	0.0115942
Cryab	2432.03	-0.429035	0.125328	-3.42329	0.000618677	0.011641
Dusp5	939.517	-0.747052	0.218281	-3.42243	0.000620643	0.0116641
Pnmal1	2341.18	-0.251494	0.0735565	-3.41906	0.000628373	0.0117813
Ccdc121	27.877	-1.07431	0.314721	-3.41355	0.000641235	0.0119938
Prickle1	2325.23	-0.40062	0.117559	-3.40782	0.000654834	0.0122192
Ephb3	602.757	-0.61754	0.181285	-3.40646	0.000658112	0.0122513
Qpct	327.492	-0.807362	0.237089	-3.40531	0.000660887	0.0122884
Arhgap26	7926.61	-0.381834	0.112231	-3.40221	0.000668443	0.0124143
Atp2a2	52294.5	-0.288572	0.0848388	-3.40142	0.000670369	0.0124208
Pnmal2	12438	-0.318494	0.0937161	-3.3985	0.000677555	0.0125359
Gpr123	1777.85	-0.42374	0.124705	-3.39793	0.000678969	0.0125359
Tcerg1l	245.012	-0.669646	0.197096	-3.39756	0.000679902	0.0125384
BC005764	1361.42	-0.401263	0.118168	-3.39571	0.000684515	0.0126087
Crhr1	1570.16	-0.567344	0.167109	-3.39506	0.000686144	0.012616
Wnt2b	64.8092	-1.76037	0.518549	-3.3948	0.000686776	0.012616
Syt5	3319.2	-0.538355	0.158592	-3.39459	0.000687314	0.012616
Csgalnact1	702.523	-0.391487	0.115427	-3.39164	0.000694769	0.0127084
Clip4	2144.12	-0.373197	0.110333	-3.38247	0.00071836	0.0131094
Scml4	84.4614	-1.38569	0.4099	-3.38056	0.000723373	0.0131449
Grid2	3641.61	-0.280968	0.0831152	-3.38046	0.000723642	0.0131449
Sytl5	217.855	-0.740579	0.219053	-3.38081	0.000722721	0.0131449
D630023F18Rik	95.4404	-1.21104	0.35832	-3.37979	0.000725424	0.013147
Gabbr2	10427.7	-0.32082	0.0949151	-3.38008	0.000724652	0.013147
Gja1	10255.8	-0.400992	0.118797	-3.37544	0.000736973	0.0133103
Hacl1	320.471	-0.351378	0.104269	-3.36991	0.000751941	0.0135496
Sdc1	216.79	-0.462988	0.137415	-3.36927	0.000753675	0.0135653
Stk17b	2287.58	-0.379498	0.11275	-3.36584	0.000763115	0.0136883
Spats2l	821.716	-0.442699	0.131513	-3.36621	0.000762093	0.0136883
Rhbdd2	2296.93	-0.273742	0.0813429	-3.36529	0.000764644	0.0137001
Adra2a	637.53	-0.492319	0.146395	-3.36295	0.000771145	0.0137928
Cep72	324.158	-0.378276	0.112719	-3.35593	0.000790982	0.0141078
Lef1	305.978	-0.444701	0.132634	-3.35285	0.000799834	0.0142174
Shb	223.834	-0.64071	0.191306	-3.34914	0.000810631	0.014393
C1qtnf1	170.077	-0.613162	0.183401	-3.34328	0.000827933	0.0146359
Gm6537	36.9799	-1.83798	0.549757	-3.34325	0.000828028	0.0146359
Thsd7b	126.459	-1.46575	0.438521	-3.34248	0.000830342	0.0146604
Cercam	243.367	-0.442222	0.132343	-3.34148	0.00083332	0.0146965
Plcxd1	363.255	-0.555044	0.166182	-3.33998	0.000837848	0.0147598
Slc25a1	902.755	-0.323745	0.0972237	-3.3299	0.000868771	0.0152194
Rmi2	19.3135	-1.31711	0.39576	-3.32805	0.000874577	0.0153041
Kcnma1	6501.27	-0.318341	0.0957195	-3.32577	0.000881735	0.0154123
Lect1	39.8985	-0.890732	0.267933	-3.32446	0.000885906	0.0154509
Clmn	6112.33	-0.413094	0.124326	-3.32265	0.000891652	0.0155339
Cabp1	3151.03	-0.282512	0.085137	-3.31833	0.000905589	0.0157245
Ldhd	430.427	-0.345233	0.104115	-3.3159	0.000913483	0.0158441
Lhpp	552.605	-0.370349	0.111727	-3.31477	0.000917171	0.0158557
Pdzd2	2158.57	-0.470562	0.142004	-3.31371	0.000920661	0.0158569
Hspb8	568.442	-0.549212	0.165726	-3.31397	0.000919815	0.0158569
Pld3	13693.8	-0.355623	0.107355	-3.31258	0.000924399	0.0158934
Magi3	2454.97	-0.395695	0.1195	-3.31126	0.000928763	0.015917
Tpbg	640.763	-0.563549	0.170192	-3.31125	0.000928805	0.015917
Shc3	1369.45	-0.569991	0.172322	-3.3077	0.000940653	0.0160691
Plvap	384.517	-0.598052	0.180807	-3.30768	0.000940739	0.0160691
A330074K22Rik	312.27	-0.603668	0.182554	-3.3068	0.000943682	0.0160845
Svep1	1028.01	-0.542013	0.164052	-3.30391	0.000953469	0.0162162
Shcbp1l	31.2175	-1.0938	0.331642	-3.29812	0.000973347	0.0165364
Dner	16661.1	-0.347132	0.105813	-3.28063	0.00103577	0.0174091
Pcdh18	286.518	-0.770609	0.235076	-3.27812	0.001045	0.0175268
Sgsm2	3011.25	-0.292318	0.0891874	-3.27757	0.00104703	0.0175422
Rab3d	535.45	-0.274274	0.0837338	-3.27554	0.00105459	0.0176126
Kcng1	276.338	-2.47977	0.757403	-3.27404	0.0010602	0.0176502
Cdc20	47.3179	-0.887562	0.271446	-3.26976	0.0010764	0.0179
Cttnbp2	3574.29	-0.330949	0.101224	-3.26947	0.00107748	0.0179
Tmem100	418.518	-0.374355	0.114576	-3.26731	0.00108574	0.0179992
Insc	137.02	-0.54373	0.16658	-3.26407	0.00109823	0.0181871
Coch	984.684	-0.369809	0.113365	-3.2621	0.00110591	0.0182838
Tnk2	7867.23	-0.257434	0.0789407	-3.26111	0.00110978	0.0182838
Ncs1	10076.5	-0.294417	0.090283	-3.26105	0.00111002	0.0182838
Gm765	42.3265	-4.16104	1.27593	-3.26118	0.00110948	0.0182838
Slc5a5	495.843	-0.587168	0.180124	-3.25981	0.00111488	0.018328
Elavl2	3123.82	-0.468391	0.143702	-3.25946	0.00111625	0.0183315
Lrrc75a	430.334	-0.500055	0.153749	-3.25241	0.00114432	0.0187559
Rgs2	1410.98	-0.324116	0.0996977	-3.25098	0.00115007	0.0188221
Pappa2	77.1589	-2.1194	0.652378	-3.24873	0.00115922	0.0189101
C2cd4c	376.982	-0.598011	0.184255	-3.24557	0.00117217	0.0190315
Gcnt1	284.191	-1.57889	0.486453	-3.24572	0.00117155	0.0190315
Bend5	176.767	-0.775282	0.238872	-3.24559	0.00117206	0.0190315
Ptpro	1153.38	-1.24497	0.383585	-3.24563	0.00117193	0.0190315
Ppp4r4	1921.29	-0.25825	0.0795985	-3.24441	0.00117693	0.0190321
Adssl1	630.754	-0.408763	0.125976	-3.24477	0.00117546	0.0190321
Tifab	85.3422	-0.80583	0.248341	-3.24485	0.00117511	0.0190321
Gm2373	11.8048	-2.26927	0.699704	-3.24318	0.00118204	0.0190934
Dbn1	5566.54	-0.294263	0.0908246	-3.23991	0.00119569	0.019257
Itih3	1406.4	-0.437586	0.135229	-3.23589	0.00121264	0.0194282
Mesdc1	1661.94	-0.290024	0.0896623	-3.23463	0.00121803	0.0194946
Arl3	2949.98	-0.286886	0.0888067	-3.23045	0.00123594	0.0197012
Sytl2	2239.33	-0.520094	0.161282	-3.22474	0.00126086	0.0200579
Epb4.1l4a	125.49	-0.841362	0.261284	-3.2201	0.00128145	0.0203238
Them6	1557.57	-0.326639	0.101469	-3.21911	0.00128589	0.0203547
Ddc	189.251	-0.660405	0.205304	-3.21671	0.00129669	0.0204624
Cdk14	7280.81	-0.405796	0.126152	-3.21673	0.00129659	0.0204624
Mctp2	45.2786	-1.21764	0.378504	-3.21699	0.00129545	0.0204624
Trim9	10121.5	-0.326088	0.101418	-3.21529	0.00130313	0.0205436
Id2	6115	-0.286272	0.0891133	-3.21244	0.00131611	0.0207275
Mog	2005.65	-0.517237	0.161134	-3.20999	0.0013274	0.0208635
F2rl2	38.5801	-3.87014	1.20596	-3.20918	0.00133115	0.0209016
Sulf2	2286.79	-0.394539	0.122982	-3.20811	0.0013361	0.0209583
Smarcd3	1832.02	-0.302746	0.0944888	-3.20404	0.00135515	0.021215
Efcab1	129.124	-0.98577	0.307773	-3.20291	0.00136048	0.0212561
Nmbr	35.6515	-1.14314	0.357734	-3.19549	0.00139595	0.0217672
E130008D07Rik	73.6977	-1.93288	0.605564	-3.19186	0.00141359	0.0219895
Cmip	9528.76	-0.305738	0.0959868	-3.18521	0.00144648	0.0223998
Grin2b	3033.67	-0.608332	0.191443	-3.17762	0.00148491	0.0229723
Grip1	637.806	-0.413683	0.1306	-3.16757	0.00153721	0.023706
Dleu7	163.562	-0.798856	0.252857	-3.15932	0.0015814	0.0242979
Hfe2	33.3801	-1.6039	0.507763	-3.15877	0.00158438	0.02432
4833424O15Rik	1988.63	-0.286116	0.0908213	-3.15032	0.00163094	0.0249134
Papss2	480.765	-0.400997	0.127324	-3.14942	0.00163597	0.024966
Gm5468	91.0551	-1.73169	0.550424	-3.14609	0.00165468	0.0252154
Sncg	92.9953	-1.25854	0.400254	-3.14435	0.00166455	0.0253041
BC030499	195.248	-0.891108	0.283478	-3.14348	0.0016695	0.0253451
Cacna1g	8834.93	-0.276772	0.0880511	-3.14331	0.00167047	0.0253451
Fam43b	768.341	-0.65788	0.209945	-3.13358	0.00172685	0.0261
1700037H04Rik	1023.92	-0.338686	0.108178	-3.13083	0.00174313	0.0262453
LOC100503676	28.9955	-1.11544	0.356225	-3.13129	0.00174038	0.0262453
A730046J19Rik	7.5031	-4.13354	1.32006	-3.13133	0.00174019	0.0262453
Lonrf3	1284.88	-0.335972	0.10737	-3.12911	0.00175339	0.0263746
Zfp385c	735.654	-0.365357	0.116914	-3.125	0.00177803	0.0266181
Serpine2	5173.83	-0.346261	0.110831	-3.12422	0.00178278	0.0266639
Rnf19b	3273.11	-0.262335	0.0840531	-3.12106	0.00180202	0.0268485
Alpl	314.32	-0.527223	0.168959	-3.12041	0.00180597	0.0268485
Gabra4	4082.53	-0.278109	0.0891632	-3.1191	0.00181402	0.0268485
Mobp	5890.1	-0.577886	0.185288	-3.11885	0.00181559	0.0268485
Gabre	6.89364	-2.68998	0.862375	-3.11927	0.00181301	0.0268485
Plp1	62361.7	-0.561805	0.180088	-3.11962	0.00181087	0.0268485
Slc29a1	713.055	-0.296609	0.0951422	-3.11753	0.00182375	0.0269187
Ephx2	520.749	-0.311803	0.100055	-3.11631	0.00183129	0.0269833
4930426D05Rik	23.3493	-2.12276	0.681224	-3.11609	0.00183264	0.0269833
Scd2	67786.8	-0.280105	0.0899278	-3.11478	0.00184084	0.0270249
Tctn2	578.017	-0.304084	0.0976284	-3.11471	0.00184124	0.0270249
Grid1	1738.61	-0.310555	0.0998289	-3.11087	0.00186537	0.0273281
Oscp1	834.53	-0.415374	0.133785	-3.10478	0.00190421	0.0277423
Tmem123	1037.57	-0.261219	0.0842415	-3.10084	0.00192974	0.0280623
Trerf1	838.361	-0.58163	0.18765	-3.09955	0.00193814	0.0281387
Adcy7	224.157	-0.740664	0.239064	-3.09818	0.00194716	0.0282374
Selplg	620.397	-0.357971	0.115553	-3.0979	0.00194896	0.0282375
Ctxn2	206.917	-0.608748	0.196678	-3.09514	0.00196717	0.028449
2410018L13Rik	29.0033	-1.84158	0.59605	-3.08964	0.00200401	0.0289022
Wdr31	150.777	-0.509832	0.165008	-3.08975	0.00200325	0.0289022
Chodl	18.2983	-2.1039	0.681079	-3.08907	0.00200781	0.0289041
Sorcs1	1505.3	-0.392238	0.126967	-3.08928	0.00200643	0.0289041
Gata3	30.9573	-4.09132	1.32555	-3.08651	0.00202519	0.0291276
Fam19a4	10.0538	-3.06049	0.992725	-3.08292	0.00204983	0.0294068
Itpka	3462.79	-0.425355	0.137998	-3.08232	0.00205392	0.0294333
Drd2	105.982	-3.14608	1.02105	-3.08122	0.00206152	0.0294639
Kcnh4	298.089	-1.33454	0.433396	-3.07926	0.00207512	0.029549
2022-09-09	1709.5	-0.51445	0.167038	-3.07984	0.00207111	0.029549
Plekhd1os	26.6852	-1.02315	0.332254	-3.07943	0.00207397	0.029549
Vsnl1	26899.6	-0.287936	0.0935669	-3.07733	0.00208863	0.0297145
Tspan18	325.525	-0.573073	0.186601	-3.07112	0.00213259	0.0302306
Atp2b4	8943.88	-0.288571	0.094052	-3.06821	0.00215344	0.030444
Gm11627	41.5545	-2.143	0.698656	-3.06732	0.00215989	0.0305078
Ampd2	2528.84	-0.3756	0.122548	-3.06492	0.0021773	0.030726
2410124H12Rik	46.9684	-0.827745	0.270339	-3.06188	0.00219952	0.030991
Zkscan16	1319.28	-0.406659	0.132816	-3.06181	0.00220001	0.030991
Glul	52412.7	-0.261059	0.0853437	-3.05892	0.00222137	0.0312507
Drd1a	316.716	-1.67553	0.547946	-3.05784	0.00222939	0.0313209
Olfr1344	11.6472	-2.5825	0.847847	-3.04596	0.00231941	0.0324697
Vat1	1362.58	-0.485801	0.159599	-3.04389	0.00233542	0.0326358
Parvg	118.855	-0.750082	0.246635	-3.04126	0.0023559	0.0328636
Sema5b	407.691	-0.637586	0.209759	-3.03962	0.00236878	0.0329849
Edil3	7233.75	-0.346055	0.113881	-3.03874	0.00237573	0.0330525
Arhgap22	148.341	-0.843638	0.277968	-3.03502	0.00240522	0.0334037
Iqsec3	6794.65	-0.413108	0.136285	-3.03121	0.00243577	0.0337091
Pls1	528.081	-0.474331	0.156633	-3.02829	0.00245941	0.0339765
Fam169a	2987.34	-0.327634	0.108213	-3.02769	0.00246434	0.034009
Limk1	2048.04	-0.518351	0.171263	-3.02663	0.00247294	0.0340738
Dcun1d4	4301.13	-0.273121	0.0902643	-3.02579	0.00247986	0.0341393
Capn3	127.475	-0.666083	0.220218	-3.02465	0.00248919	0.0342377
Ccdc148	567.782	-0.414833	0.137249	-3.02249	0.00250704	0.0344531
Rspo3	525.167	-0.383401	0.126932	-3.02052	0.00252339	0.0345161
Olfm2	2369.03	-0.419449	0.138848	-3.02093	0.00251999	0.0345161
Htr3a	105.167	-1.87189	0.61978	-3.02025	0.00252562	0.0345161
Rwdd2a	554.643	-0.540712	0.179038	-3.02009	0.00252696	0.0345161
Nhs	180.967	-0.666184	0.220574	-3.02023	0.00252586	0.0345161
Mkx	567.929	-0.432326	0.143221	-3.01859	0.00253951	0.0346274
Kcnip4	3733.97	-0.379628	0.126001	-3.0129	0.00258762	0.035253
Plcl1	1629.19	-0.372904	0.12394	-3.00875	0.00262325	0.0356152
Khdrbs3	3437.05	-0.434532	0.144562	-3.00585	0.00264844	0.0358952
Fam163a	247.42	-0.831506	0.27666	-3.00552	0.0026513	0.0359032
Prr7	772.73	-0.55914	0.186094	-3.00461	0.00265918	0.0359789
Mgat4c	330.654	-0.709766	0.236306	-3.00359	0.00266815	0.0360693
Pamr1	731.701	-0.474787	0.158167	-3.00181	0.00268383	0.0362191
Sfrp2	52.4034	-1.07944	0.359874	-2.99949	0.00270429	0.0364639
Cdh10	1813.23	-0.299834	0.100075	-2.9961	0.0027346	0.0367336
Tdrp	591.342	-0.293696	0.0980311	-2.99595	0.00273595	0.0367336
Amica1	103.145	-0.626726	0.209173	-2.99621	0.00273362	0.0367336
Rerg	202.186	-0.916305	0.30616	-2.99289	0.00276348	0.0370401
Pcbd1	146.155	-0.682821	0.228261	-2.9914	0.002777	0.037158
Slc14a2	8.0197	-2.22774	0.7461	-2.98585	0.00282794	0.0377115
Mboat7	3685	-0.263109	0.0881382	-2.98518	0.00283408	0.0377613
Kif17	587.306	-0.282589	0.094841	-2.97961	0.00288617	0.0383581
Reep6	418.726	-0.446827	0.149977	-2.97931	0.002889	0.0383634
Aif1l	298.837	-0.389835	0.13093	-2.97743	0.00290677	0.0385018
Pde7b	1452.76	-0.394244	0.132522	-2.97495	0.00293041	0.0387823
Mast4	2598.36	-0.307955	0.103541	-2.97424	0.00293712	0.0388385
Lgals1	298.907	-0.423565	0.142722	-2.96776	0.00299977	0.0395341
Bnipl	13.2665	-1.53679	0.518147	-2.96593	0.00301771	0.0397373
Snrk	7237.01	-0.339637	0.114529	-2.96551	0.00302179	0.0397578
Hpcal4	24871.1	-0.35375	0.11939	-2.96299	0.00304668	0.0399682
Gp1bb	277.617	-0.368468	0.124382	-2.9624	0.00305252	0.0399951
Opn3	361.283	-0.477305	0.1614	-2.95728	0.00310363	0.0405636
Nefm	8383.02	-0.458299	0.155168	-2.95356	0.0031413	0.0409201
Pllp	1600.37	-0.400556	0.135673	-2.95237	0.00315343	0.0410102
Slc18a3	9.97706	-4.76968	1.6163	-2.951	0.0031675	0.0411592
Plekha7	563.76	-0.286338	0.0970909	-2.94917	0.00318624	0.0413345
Fhod3	2165.26	-0.358204	0.121588	-2.94605	0.00321858	0.0416854
B3gnt2	966.628	-0.33658	0.114341	-2.94365	0.00324371	0.0419763
Npffr2	5.54579	-5.30293	1.80342	-2.94048	0.00327706	0.0423731
Nsun7	114.248	-0.8008	0.272668	-2.93691	0.00331502	0.0427353
Zfp941	1139.65	-0.325262	0.110747	-2.93698	0.00331429	0.0427353
Cacna1s	43.6824	-1.06282	0.361994	-2.93603	0.00332446	0.0428102
Pde9a	1127.19	-0.302822	0.103195	-2.93446	0.00334124	0.0429912
Necab3	1881.8	-0.306533	0.104502	-2.93327	0.00335413	0.0430866
Efna3	762.65	-0.43338	0.147918	-2.92986	0.00339109	0.0434551
Cabp2	37.7368	-0.854899	0.292072	-2.92702	0.00342232	0.043784
Mgat5b	2620.21	-0.295375	0.100926	-2.92665	0.00342637	0.0438002
Hmgcs1	10089.8	-0.259504	0.0887129	-2.92521	0.00344222	0.0439672
Klhl14	88.2212	-1.43318	0.490203	-2.92364	0.00345961	0.044082
Tssk5	26.6533	-1.16744	0.399432	-2.92274	0.00346965	0.0441385
Arhgef4	5924.34	-0.374323	0.128282	-2.91798	0.0035231	0.0447463
Papl	22.8105	-3.00919	1.03241	-2.91473	0.00355991	0.0451409
Jph2	39.6525	-0.999851	0.343157	-2.91368	0.00357193	0.0451842
Smyd5	1219.7	-0.270124	0.0927012	-2.91392	0.00356922	0.0451842
Grb14	815.969	-0.322371	0.110671	-2.91287	0.00358122	0.0452291
Mok	189.751	-0.423911	0.14561	-2.91128	0.00359949	0.0454233
Cst3	18689.1	-0.392613	0.134905	-2.9103	0.00361078	0.0455294
Eif5a2	3986.29	-0.360611	0.123944	-2.90946	0.00362058	0.0456164
Arnt2	10375.9	-0.286083	0.0984403	-2.90616	0.00365898	0.0460421
Tnfaip6	362.492	-0.339185	0.116928	-2.90081	0.00372204	0.0467079
Adhfe1	487.521	-0.370148	0.127699	-2.8986	0.00374838	0.0469968
Kcng3	74.159	-1.40609	0.48513	-2.89837	0.00375103	0.0469968
Omg	4692.56	-0.284082	0.0980744	-2.8966	0.00377227	0.0471879
Sh3kbp1	1339.2	-0.419094	0.144819	-2.89392	0.00380463	0.0475548
Plbd2	2500.88	-0.272449	0.0942512	-2.89067	0.00384427	0.0479361
Sox13	350.223	-0.293163	0.101552	-2.88681	0.00389166	0.0484121
Baalc	6824.63	-0.280265	0.0971318	-2.88541	0.00390903	0.0485879
C130026L21Rik	97.9055	-1.23725	0.428829	-2.88517	0.00391196	0.0485879
Rab9b	1623.44	-0.307551	0.106679	-2.88295	0.00393967	0.048855

## Sheet: Cerebellum- Upregulated DEGs
Upregulated DEGs in SCA1 KI Cerebellum
Gene	baseMean	log2FoldChange	lfcSE	stat	pvalue	padj
Mndal	75.3572	1.93071	0.238532	8.09414	5.76686e-16	1.65131e-13
Snca	5895.2	0.581623	0.0814083	7.14451	9.0318e-13	1.58046e-10
Cbx4	2564.35	0.547739	0.0772474	7.09072	1.3342e-12	2.24319e-10
Igsf10	428.283	0.84724	0.127523	6.64383	3.05627e-11	4.37574e-09
Tiam2	1703.08	0.581922	0.0893453	6.51317	7.35788e-11	9.73775e-09
Polr2a	4517.68	0.458542	0.0704324	6.51039	7.49561e-11	9.83736e-09
Adamts18	521.675	0.949087	0.147386	6.43946	1.19899e-10	1.49864e-08
Slc44a5	270.101	1.24868	0.194092	6.43343	1.24757e-10	1.535e-08
Marcks	11943.6	0.731166	0.116513	6.27542	3.48702e-10	4.00855e-08
Cemip	1300.44	0.663534	0.107921	6.14834	7.82966e-10	8.56315e-08
Synpr	4678.39	0.999818	0.163371	6.11993	9.36173e-10	9.96135e-08
Cdh7	1364.42	0.44395	0.0737846	6.01685	1.77848e-09	1.79547e-07
Gpr85	1993.66	0.381417	0.063864	5.97234	2.33881e-09	2.2737e-07
Parp12	524.001	0.550333	0.093931	5.85891	4.65908e-09	4.217e-07
Ifi203	91.053	1.36297	0.236091	5.77306	7.78454e-09	6.62695e-07
Pik3cd	824.154	0.642298	0.11274	5.69715	1.21826e-08	9.99289e-07
Kcnb2	591.725	0.8191	0.152522	5.37038	7.85695e-08	5.45106e-06
Kctd8	856.885	0.438608	0.0820237	5.34733	8.92604e-08	6.11201e-06
Il1r1	262.225	0.625072	0.118154	5.29031	1.22112e-07	7.97985e-06
Sv2b	19979.3	0.423494	0.0806125	5.25345	1.49274e-07	9.59557e-06
Sh2b2	220.022	0.691531	0.13204	5.23728	1.62964e-07	1.03073e-05
Pde3a	477.992	1.05191	0.204132	5.15311	2.56202e-07	1.52261e-05
Elovl2	1539.93	0.349759	0.0681211	5.13437	2.83092e-07	1.66359e-05
Muc15	75.1284	0.950647	0.191459	4.96528	6.86027e-07	3.56576e-05
Nalcn	6317.18	0.265096	0.0534556	4.95918	7.07906e-07	3.6434e-05
Me3	1394.94	0.390011	0.0786962	4.9559	7.19972e-07	3.69344e-05
Dpysl4	2622.48	0.542305	0.109753	4.94112	7.76736e-07	3.88343e-05
Map3k5	2125.54	0.559985	0.114846	4.87595	1.08286e-06	5.23129e-05
Col19a1	1227.43	0.592052	0.121887	4.85739	1.18944e-06	5.6765e-05
Casd1	3899.42	0.259297	0.0538599	4.81428	1.47731e-06	6.84296e-05
Lhfpl2	1586.08	0.458559	0.0953024	4.81162	1.49709e-06	6.91427e-05
Cbx8	395.523	0.606053	0.126201	4.80228	1.56872e-06	7.20285e-05
Rian	19917.4	0.380437	0.0792704	4.79923	1.59277e-06	7.27089e-05
Aacs	1480.49	0.391332	0.0818397	4.78169	1.73829e-06	7.82895e-05
Ncald	18518.6	0.358659	0.07515	4.77258	1.81881e-06	8.16083e-05
Ppp1r14c	723.483	0.388703	0.0817081	4.75722	1.96282e-06	8.68327e-05
Cadps2	10253.8	0.605544	0.128995	4.69433	2.67483e-06	0.000114785
Epha7	2392.41	0.464984	0.100963	4.60549	4.11494e-06	0.000168394
Angpt1	668.105	0.504712	0.110652	4.56126	5.08475e-06	0.000202734
Prdm8	1981.92	0.490674	0.108605	4.51797	6.24354e-06	0.000242191
Tmem181c-ps	573.616	0.603178	0.133547	4.51661	6.28362e-06	0.000242551
Nyap2	731.081	0.456039	0.101709	4.48374	7.3345e-06	0.000275683
Sprn	5249.6	0.375519	0.0839094	4.47529	7.63064e-06	0.000284101
Fxyd6	3859.45	0.468369	0.10475	4.47132	7.77392e-06	0.000288754
Sobp	4349.49	0.320857	0.0719209	4.46125	8.14838e-06	0.000301242
Cdh8	2002.44	0.355889	0.0797838	4.46066	8.17065e-06	0.000301357
E2f3	1273.28	0.369697	0.0832774	4.43934	9.02341e-06	0.00032594
Alg6	539.814	0.486214	0.109587	4.43678	9.13131e-06	0.000327834
Rnmt	4037.93	0.271617	0.0612636	4.43358	9.26818e-06	0.000330985
Slitrk2	2000.35	0.466905	0.105569	4.42274	9.74581e-06	0.000347255
Hmgn5	606.499	0.459996	0.104396	4.40625	1.05175e-05	0.000373904
Sfrp4	83.214	1.01721	0.232077	4.38307	1.17021e-05	0.000412296
Flrt3	1217.82	0.324195	0.0739876	4.38175	1.1773e-05	0.000413869
Trhde	2055.34	0.572221	0.131591	4.34847	1.3709e-05	0.000468839
Eps8	3547.9	0.499044	0.115193	4.33225	1.47595e-05	0.000497818
Brinp3	1246.06	0.457911	0.105774	4.32915	1.49683e-05	0.00049944
Slit3	1004.34	0.612172	0.14173	4.31927	1.56547e-05	0.000518791
Bmi1	2750.42	0.266543	0.0622767	4.27999	1.86904e-05	0.000609432
Mb21d2	2002.69	0.440949	0.103497	4.2605	2.03974e-05	0.000659629
Fam135a	2299.85	0.311873	0.0739408	4.21787	2.46621e-05	0.000784655
Proser2	385.534	0.549273	0.130502	4.20894	2.56573e-05	0.00081467
Tigd2	824.337	0.350934	0.0835537	4.2001	2.66798e-05	0.000843736
Cblb	1353.49	0.419014	0.100537	4.16777	3.07599e-05	0.000938832
Cgn	315.252	0.451686	0.108965	4.14523	3.39471e-05	0.0010242
Slc6a15	3629.15	0.373061	0.0900101	4.14466	3.40316e-05	0.00102479
Tnfrsf11b	364.361	0.610509	0.148205	4.11935	3.79937e-05	0.00113112
Mctp1	3204.1	0.303613	0.0737542	4.11655	3.84588e-05	0.00114281
Eif2ak2	440.482	0.412589	0.101655	4.05872	4.9342e-05	0.00142063
Gpr158	10969.3	0.362775	0.0896176	4.04803	5.16496e-05	0.00147628
Arxes1	991.779	0.277384	0.0690505	4.01712	5.89138e-05	0.00165389
1700020I14Rik	7585.72	0.376259	0.0940172	4.00203	6.28026e-05	0.00174133
Ss18	1507.39	0.252373	0.0631444	3.99675	6.42168e-05	0.0017688
Rhbdf1	433.608	0.401143	0.101044	3.96997	7.18806e-05	0.0019451
Gpm6a	68111.4	0.280159	0.0707565	3.95948	7.5112e-05	0.00200838
Pard6g	739.446	0.391876	0.0990591	3.95598	7.62218e-05	0.0020209
AF357359	790.244	0.398999	0.100898	3.95449	7.6699e-05	0.00202673
Ifit1	183.879	0.934425	0.236765	3.94663	7.92586e-05	0.00209086
Otud7a	2204.58	0.397712	0.100852	3.94351	8.02993e-05	0.00211477
Irf7	118.867	1.16741	0.296116	3.9424	8.06718e-05	0.00212104
C130030K03Rik	414.012	0.393081	0.100344	3.91735	8.95289e-05	0.00233056
Sema3a	1762.99	0.537807	0.137668	3.90655	9.36252e-05	0.00242517
Grik2	3010.47	0.375599	0.0963183	3.89956	9.63675e-05	0.00248802
Zfpm2	2063.82	0.4488	0.116101	3.8656	0.000110816	0.00280135
A830010M20Rik	6642.56	0.34602	0.0895461	3.86415	0.000111475	0.00280257
Slc2a6	734.064	0.380617	0.0987592	3.85399	0.00011621	0.00289064
Epc2	3013.66	0.30313	0.0786603	3.85366	0.000116367	0.00289064
Ccnd1	2036.25	0.542327	0.140842	3.85062	0.000117819	0.0029221
Necab1	4997.17	0.570021	0.149725	3.80711	0.0001406	0.00337547
Casp3	700.644	0.462292	0.122064	3.78728	0.000152304	0.00360155
Gprin3	408.172	0.736772	0.194876	3.78073	0.000156369	0.0036811
Tgfb3	739.988	0.510932	0.135183	3.77956	0.000157104	0.00369288
Gtf2ird2	741.717	0.269912	0.0719	3.75399	0.00017404	0.0040427
Gpd1	4939.35	0.280289	0.0747508	3.74964	0.000177089	0.00410143
Lrp1b	1675.9	0.487093	0.130464	3.73355	0.000188803	0.00433449
Prrc1	942.272	0.265863	0.0713291	3.72728	0.000193559	0.00441792
Ankrd50	1929.56	0.394775	0.106975	3.69034	0.000223953	0.00500999
Lrrn1	4534.43	0.304732	0.0834202	3.65297	0.000259221	0.00570974
Nasp	736.195	0.341946	0.0936782	3.65022	0.000262018	0.00575525
Mcu	1665.96	0.286898	0.0790033	3.63147	0.000281814	0.00615573
Brpf3	1607.12	0.384973	0.106221	3.62425	0.000289806	0.00627806
Lrch2	1171.81	0.258572	0.0715334	3.61471	0.000300688	0.00648249
St6galnac4	2009.7	0.323769	0.0897251	3.60846	0.000308025	0.00660012
Suv420h1	3408.86	0.279278	0.0774101	3.60777	0.000308838	0.00660854
Gbas	4088.49	0.292303	0.0810659	3.60575	0.000311255	0.00665123
Cmtr2	401.583	0.375899	0.104488	3.59752	0.000321261	0.0068297
Cul4a	3515.19	0.254597	0.0718761	3.54216	0.000396862	0.00813826
Pxylp1	1294.49	0.412419	0.116517	3.53957	0.000400786	0.00820804
Cacna1d	2669.95	0.33197	0.094109	3.52751	0.000419493	0.00854669
Rmnd5b	1277.73	0.284649	0.0811454	3.50788	0.000451687	0.00903891
Exoc6	1418.74	0.259668	0.0740321	3.50751	0.000452329	0.00904026
Zcchc14	3897.19	0.335355	0.0961096	3.4893	0.000484296	0.00964245
Slc2a9	61.4727	0.970503	0.278513	3.48458	0.000492904	0.00978866
Hook1	2355.67	0.316628	0.0910677	3.47685	0.000507347	0.0100128
Tmem2	1178.89	0.309885	0.0891391	3.47643	0.000508145	0.010016
Smad1	1300.21	0.29806	0.0857671	3.47522	0.000510433	0.010036
Armc8	3905.7	0.27778	0.0802574	3.46112	0.000537937	0.010442
Nfib	8061.34	0.375387	0.108671	3.45434	0.000551632	0.0106466
Ino80dos	199.531	0.501343	0.145261	3.45132	0.000557853	0.0107404
AF529169	305.027	0.538553	0.156163	3.44866	0.000563375	0.0108259
Cidea	175.169	0.525667	0.152613	3.44445	0.000572229	0.0109769
Ldlrad4	1391.11	0.278241	0.0808579	3.44111	0.000579325	0.0110726
Serpinb8	320.509	0.687604	0.199892	3.43988	0.000581981	0.0111098
Lhfp	2728.29	0.320267	0.0931517	3.43812	0.000585763	0.011155
Chchd7	787.506	0.283297	0.082479	3.43478	0.000593036	0.0112663
Ipcef1	4825.7	0.447452	0.130286	3.43437	0.000593927	0.0112696
Trpv2	741.762	0.392285	0.114268	3.43301	0.000596919	0.0113127
Slc16a14	226.25	0.510454	0.149218	3.42086	0.000624242	0.0117177
Tmod1	2614.42	0.260979	0.0763636	3.41758	0.000631804	0.0118315
Rnf39	174.754	0.748863	0.219411	3.41306	0.000642368	0.0120008
Mex3b	771.524	0.410717	0.120867	3.39807	0.000678619	0.0125359
Fam13a	2332.02	0.315327	0.0929208	3.3935	0.000690047	0.0126514
Fut10	527.985	0.269254	0.0794945	3.38708	0.000706413	0.0129064
C230004F18Rik	327.04	0.330658	0.0977869	3.38141	0.000721147	0.0131449
Irgm1	470.165	0.45355	0.134745	3.366	0.000762671	0.0136883
Cdc40	1806.24	0.270364	0.0803986	3.3628	0.000771571	0.0137928
Cpsf4l	70.6797	0.94794	0.28197	3.36185	0.000774223	0.0138245
Wsb1	3152.4	0.383242	0.114238	3.35477	0.000794298	0.0141349
Prox1	920.432	0.410294	0.122522	3.34875	0.000811768	0.014397
Itgb3	171.069	0.481732	0.144545	3.33274	0.000859967	0.0150988
Eps8l1	237.291	0.89729	0.26933	3.33156	0.000863608	0.0151458
Bdh1	2161.5	0.289094	0.086956	3.32459	0.000885474	0.0154509
Lrrtm2	3460.14	0.317878	0.095713	3.32116	0.000896454	0.0156003
Lpcat1	910.992	0.260212	0.0784908	3.31518	0.000915829	0.0158499
Sstr3	839.524	0.409923	0.123712	3.31353	0.00092127	0.0158569
Wdr44	934.424	0.294196	0.088771	3.3141	0.000919377	0.0158569
Hmgn3	1383.89	0.322594	0.0974632	3.3099	0.000933279	0.0159763
Ldoc1	289.691	0.550958	0.166671	3.30566	0.00094754	0.0161328
Lrrc4	4630.7	0.289813	0.0879706	3.29443	0.000986224	0.0167011
Pak7	2601.08	0.392881	0.11938	3.291	0.00099831	0.0168695
Slc35f3	1462.27	0.255644	0.0776977	3.29024	0.00100103	0.0168974
Xkr4	1015.38	0.307667	0.0935775	3.28783	0.00100965	0.0170245
Ppl	51.7368	0.854577	0.26014	3.28506	0.00101961	0.0171741
Tpcn2	238.904	0.627074	0.191241	3.27897	0.00104186	0.0174929
Tmem132c	986.546	0.329541	0.100594	3.27596	0.00105303	0.0176052
Nfkb1	883.613	0.255498	0.0780219	3.2747	0.00105775	0.0176468
Kptn	607.918	0.352147	0.107556	3.27407	0.00106009	0.0176502
Riok1	533.551	0.299236	0.091568	3.26791	0.00108345	0.0179803
Prom1	1113.98	0.290962	0.0892	3.2619	0.00110668	0.0182838
Pcdhb20	603.929	0.318833	0.0980311	3.25237	0.00114448	0.0187559
Zfp963	196.62	0.420169	0.129507	3.24439	0.00117704	0.0190321
Ppp4r1	1371.81	0.262139	0.0809105	3.23987	0.00119584	0.019257
Cdc25a	500.583	0.282858	0.0872933	3.24032	0.00119396	0.019257
Pcgf2	998.49	0.318636	0.0984056	3.23799	0.00120377	0.0193254
Fam184b	386.5	0.434745	0.134509	3.23209	0.00122887	0.0196282
Bmp5	415.441	0.54616	0.168978	3.23214	0.00122868	0.0196282
Ankrd44	716.378	0.299562	0.092715	3.231	0.00123356	0.0196833
Srsf12	876.742	0.309673	0.0960636	3.22363	0.00126579	0.0200956
Mfsd10	574.491	0.356247	0.110937	3.21126	0.00132154	0.0207922
Itga4	598.325	0.530016	0.165463	3.20323	0.00135895	0.0212534
A630072M18Rik	332.948	0.368152	0.114986	3.20171	0.00136613	0.0213233
Tnik	6912.27	0.262187	0.0820841	3.19413	0.00140252	0.021848
Kcnj3	3003.39	0.304943	0.0955913	3.19007	0.00142237	0.0220916
Fus	8654.47	0.258884	0.0812112	3.18779	0.00143366	0.022245
Ccnjl	321.308	0.423048	0.133211	3.17577	0.00149442	0.0230967
Plod2	426.722	0.421259	0.133001	3.16735	0.00153836	0.023706
Zfp583	256.36	0.37321	0.117883	3.16594	0.00154584	0.0237981
Fam110b	959.767	0.299259	0.0946119	3.16302	0.00156143	0.0240146
Kbtbd11	7184.76	0.269374	0.0853246	3.15704	0.00159377	0.0244404
Vat1l	4609.77	0.492705	0.156375	3.15079	0.00162831	0.0248974
Comp	60.6248	0.858537	0.272911	3.14585	0.00165605	0.0252154
Plxna2	5344.37	0.342162	0.109068	3.13715	0.001706	0.0258593
Amer3	1968.52	0.326116	0.104038	3.13459	0.00172094	0.0260607
D630045J12Rik	2607.73	0.287405	0.0918917	3.12765	0.00176209	0.0264801
Tet1	1556.65	0.375967	0.120232	3.12701	0.00176594	0.0265126
Antxr2	122.935	0.517388	0.16551	3.12603	0.00177183	0.0265757
Slc9a9	679.274	0.359331	0.11518	3.11975	0.00181008	0.0268485
Cntn6	2073.25	0.307992	0.0987844	3.11782	0.00182191	0.0269168
Csf2ra	719.217	0.447632	0.143669	3.11572	0.00183498	0.0269833
Cdh15	1084.38	0.458638	0.147192	3.11591	0.00183377	0.0269833
Hrk	1217.39	0.616761	0.198122	3.11303	0.00185179	0.0271544
Zfp61	550.814	0.326426	0.104959	3.11003	0.00187069	0.0273806
5031425E22Rik	705.484	0.328237	0.105582	3.10883	0.00187833	0.0274668
Nck2	1096.84	0.264528	0.0851584	3.1063	0.00189441	0.0276507
Nr2f1	3138.31	0.313492	0.101074	3.10161	0.00192471	0.028015
Iqgap2	704.129	0.524238	0.169137	3.09949	0.00193857	0.0281387
Dclk2	2784.8	0.292308	0.0943831	3.09704	0.00195464	0.0282938
Bach1	1030.29	0.291291	0.0941641	3.09344	0.00197851	0.0285868
Pcdhb13	317.858	0.376212	0.122016	3.08329	0.00204728	0.0294068
Myt1	1959.44	0.421235	0.136678	3.08196	0.00205645	0.0294428
Rfx7	2750.56	0.253993	0.0824331	3.0812	0.00206167	0.0294639
Ntf3	142.438	0.786898	0.255736	3.07699	0.00209099	0.0297212
Rsad2	110.474	0.88746	0.289133	3.06939	0.00214497	0.0303618
Osgin2	910.352	0.265219	0.0867074	3.05878	0.00222241	0.0312507
Ephx4	1513.48	0.447625	0.147056	3.0439	0.00233529	0.0326358
Fancg	489.473	0.307183	0.100958	3.04267	0.0023449	0.0327392
Tmtc2	1539.62	0.338457	0.111537	3.03448	0.00240952	0.03342
Tmem51	461.486	0.366456	0.121044	3.02747	0.00246608	0.034009
Slc7a8	3036.57	0.300987	0.0996518	3.02038	0.00252454	0.0345161
Spon1	3934.98	0.41741	0.138637	3.01081	0.00260552	0.0354355
Zfp784	191.624	0.418577	0.139638	2.99758	0.00272132	0.0366622
Slc8a3	1693.57	0.388125	0.129617	2.99441	0.00274976	0.0368875
Tlx3	173.515	0.579228	0.194244	2.98196	0.00286411	0.0381203
Zfp521	3202.19	0.344502	0.115536	2.98177	0.00286586	0.0381203
Pm20d2	653.437	0.268838	0.0902508	2.97879	0.00289388	0.0383958
Radil	709.69	0.40873	0.137544	2.97162	0.00296234	0.0391392
Fgf5	137.61	0.541015	0.183165	2.9537	0.00313987	0.0409201
Zfp786	206.868	0.381878	0.129328	2.95279	0.00314914	0.0409883
Lmnb1	470.996	0.276838	0.0938576	2.94955	0.00318237	0.0413184
Tcf4	17711.2	0.28458	0.09658	2.94657	0.00321317	0.0416495
Lnx2	759.855	0.431967	0.146931	2.93994	0.00328275	0.0424118
Dsc2	38.9485	0.925512	0.315694	2.93167	0.00337142	0.0432734
Zic3	411.683	0.471351	0.160813	2.93104	0.00337824	0.0433257
Zic5	453.781	0.519046	0.177475	2.92462	0.00344874	0.0440148
Zfp697	793.791	0.382542	0.130869	2.9231	0.00346563	0.0441231
Cdyl	529.808	0.368699	0.126173	2.92216	0.00347608	0.0441846
Slc17a7	34565	0.337968	0.115992	2.91372	0.00357147	0.0451842
Fam212b	3303.79	0.333421	0.114733	2.90605	0.00366021	0.0460421
Myh13	8.40996	2.25607	0.777641	2.90117	0.00371768	0.0467079
Cd70	63.1406	0.606474	0.209269	2.89806	0.00375483	0.047007
Slc39a6	2112.47	0.258782	0.0895597	2.8895	0.0038586	0.0480768
Nxn	849.002	0.356906	0.123586	2.88792	0.00387799	0.0482802
Nfyc	1441.57	0.293238	0.101917	2.87724	0.00401174	0.0496706
