# Supplementary material for: Identifying Disease Signatures in the Spinocerebellar Ataxia Type 1 Mouse Cortex
Source: Cells. 2022 Aug 24;11(17):2632. doi: 10.3390/cells11172632 (PMC9454518; doi:10.3390/cells11172632)
Supplement: Supplementary file 1 [file cells-11-02632-s001.zip › Luttik et al._Table S2 [GO terms for downregulated DEGs in SCA1 cortex].xlsx]

## Sheet: Cortex- Downreg. in SCA1 KI 
source	term_name	term_id	adjusted_p_value	negative_log10_of_adjusted_p_value	term_size	query_size	intersection_size	effective_domain_size	intersections
GO:MF	protein binding	GO:0005515	2.23e-100	99.6514	10481	1395	963	25412	LYNX1,MAPK4,MAP6D1,SCRT1,ARPP19,MGLL,AFAP1L1,ADRA1D,RPH3A,NRN1,PLCB1,FBXW7,ANO3,CAMKK2,DGKZ,SIPA1L1,GIT1,LZTS3,WHRN,ZFPM1,ASAP1,LGI2,LY6E,NOS1AP,PPME1,SMAD3,PTPN3,KCTD1,GRM2,MAPK6,KCTD17,ETL4,TNNC1,SNAP25,EVC2,TTC7B,ZFP703,ATF6,SORBS2,GRIN2A,DIO2,KCNC1,NLK,NBL1,CD6,ARHGEF17,TUBA4A,ARPP21,PRKCB,KCNA2,CALM1,OLFM1,PLCB4,WNT4,SLC13A5,RIMS3,HEG1,WNT9A,KCNA1,RASD1,TTLL11,LINGO1,MYL4,ATP2B2,TRPC6,SEC14L…
GO:MF	binding	GO:0005488	4.16e-59	58.3813	16232	1395	1164	25412	LYNX1,MAPK4,EFHD2,MAP6D1,SCRT1,ARPP19,MGLL,ENDOU,TTL,AFAP1L1,ADRA1D,RPH3A,NRN1,ADCY9,PLCB1,STARD8,FBXW7,ANO3,CAMKK2,DGKZ,SIPA1L1,NFIC,GIT1,LZTS3,WHRN,ZFPM1,ASAP1,LGI2,LY6E,NOS1AP,PPME1,SMAD3,PTPN3,CUX1,KCTD1,GRM2,MAPK6,KCTD17,ETL4,CPNE9,TNNC1,R3HDM1,SNAP25,EVC2,TTC7B,ZNFX1,ZFP703,SYT2,ATF6,SORBS2,GRIN2A,DIO2,KCNC1,NLK,NBL1,ETNK2,CD6,PDP1,ARHGEF17,TUBA4A,ARPP21,PRKCB,KCNA2,CALM1,OLFM1,HKDC1,PLCB4,…
GO:MF	cytoskeletal protein binding	GO:0008092	4.93e-24	23.3068	1003	1395	144	25412	MAP6D1,SIPA1L1,GIT1,PTPN3,TNNC1,SNAP25,KCNC1,KCNA2,CALM1,TTLL11,MYL4,TRPC6,LASP1,DLG4,PACSIN1,PAK1,ARC,MYBPC3,ATP1A1,KIF5C,FMN1,LMTK2,INF2,OBSCN,PHACTR1,PPP1R9A,RAB6B,MYO5C,PKNOX2,CDK5R2,SYNE1,MYO5A,INPPL1,STRBP,PACSIN3,SPIRE1,SPTBN2,MYRIP,MAP1A,FARP1,MYH7B,KLHL2,TTLL7,CCDC88C,DMTN,CLSTN1,SHANK3,MYO18A,SPTB,ACTN4,LRRK2,PPP1R9B,FAM107A,CAP2,KCTD6,MYH2,APBB1,PTPRT,NRCAM,PTK2,FERMT2,CTNNA2,MYO1E,NAV…
GO:MF	metal ion transmembrane transporter activity	GO:0046873	5.89e-21	20.2297	417	1395	81	25412	SNAP25,GRIN2A,KCNC1,KCNA2,SLC39A10,SLC13A5,KCNA1,SLC24A2,CACNA1I,ATP2B2,TRPC6,ITPR1,ATP1A1,ATP2B1,SCN8A,CACNB3,SLC30A4,SLC6A1,KCNIP3,CACNA2D3,SLC1A3,TFRC,KCNJ6,KCNH1,SLC25A37,RYR1,SCN1B,SLC1A2,SLC12A5,GRIN1,KCNQ3,KCNJ9,CACNG2,SLC4A11,CACNB4,ATP1B2,GRIK5,KCNJ12,SLC9A5,KCNJ10,CNR1,HCN1,ATP2A1,KCNK12,KCNJ11,STIM2,TMEM38A,CACNA1A,SLC4A4,TRPM4,KCNK2,KCNN2,ITGAV,SLC24A3,SLC28A1,KCNS2,ATP1A2,KCNK1,KCNK9…
GO:MF	ion binding	GO:0043167	3.17e-18	17.4995	5914	1395	474	25412	MAPK4,EFHD2,SCRT1,ENDOU,TTL,RPH3A,ADCY9,PLCB1,CAMKK2,DGKZ,GIT1,ZFPM1,ASAP1,SMAD3,MAPK6,TNNC1,ZNFX1,ZFP703,SYT2,GRIN2A,NLK,ETNK2,PDP1,TUBA4A,PRKCB,CALM1,HKDC1,PLCB4,HEG1,PHOSPHO1,RASD1,TTLL11,MYL4,ATP2B2,TRPC6,LASP1,SCUBE1,PITPNM2,PAK1,CAMK4,ADCY1,ITPR1,ATP1A1,ZMYND8,MAST3,TRIM37,CRIP2,PPP3CA,MAN1C1,BSN,NUDT3,DNAJC21,ATP2B1,RIMS1,KIF5C,AIFM3,GUCY2G,ACAP3,SLC25A23,GALNT18,RTN4R,LMTK2,AGMAT,ASTN2,ZM…
GO:MF	enzyme binding	GO:0019899	2.18e-17	16.6612	2265	1395	228	25412	MAPK4,ARPP19,RPH3A,PLCB1,FBXW7,SIPA1L1,GIT1,NOS1AP,PPME1,SMAD3,PTPN3,MAPK6,ATF6,GRIN2A,DIO2,NLK,CD6,TUBA4A,PRKCB,CALM1,PLCB4,RIMS3,TRPC6,DLG4,CAMTA2,PITPNM2,PAK1,WFS1,ITPR1,ATP1A1,TRIM37,CYFIP2,PPP3CA,BOK,RIMS1,INF2,EXPH5,CACNB3,PHACTR1,TBC1D30,PPP1R9A,SORT1,CDK5R2,SYNE1,DAB2IP,STX1B,AKT2,MYO5A,IQSEC1,PTN,RAPGEF4,MYRIP,CRY2,FARP1,DUSP1,RNF144A,TFRC,PPP3R1,HSPA1B,KCNH1,CADM4,CNKSR2,RIMS4,GOLGA7B,R…
GO:MF	actin binding	GO:0003779	4.82e-17	16.3169	449	1395	78	25412	SIPA1L1,TNNC1,MYL4,TRPC6,LASP1,ARC,FMN1,INF2,PHACTR1,PPP1R9A,MYO5C,PKNOX2,CDK5R2,SYNE1,MYO5A,INPPL1,SPIRE1,SPTBN2,MYRIP,MAP1A,MYH7B,KLHL2,DMTN,SHANK3,MYO18A,SPTB,ACTN4,LRRK2,PPP1R9B,FAM107A,CAP2,MYH2,PTK2,FERMT2,CTNNA2,MYO1E,MICAL2,TPM1,HOMER2,CORO2A,PLEC,SHROOM3,PHACTR3,CDK5R1,EPS8L2,PRKCE,GIPC1,CORO2B,FMNL1,MYH10,AKAP5,LSP1,GAS2L1,ACTN1,WASF1,WIPF2,MYH7,MYO6,MYH4,MICAL3,SNTB2,ACTR3B,PDLIM1,UTRN…
GO:MF	inorganic molecular entity transmembrane transporter activity	GO:0015318	1.83e-16	15.7381	699	1395	101	25412	GABRD,ANO3,SNAP25,GRIN2A,KCNC1,KCNA2,SLC39A10,SLC13A5,KCNA1,SLC24A2,CACNA1I,ATP2B2,TRPC6,LRRC8B,ITPR1,ATP1A1,ATP2B1,SCN8A,GABRA1,CACNB3,SLC30A4,SLC6A1,GRIA4,KCNIP3,GABRB2,TTYH1,CACNA2D3,SLC1A3,TFRC,KCNJ6,KCNH1,GLRB,SLC25A37,RYR1,SCN1B,SLC1A2,SLC12A5,GRIN1,KCNQ3,KCNJ9,CACNG2,SLC4A11,GABRG2,CACNB4,ATP1B2,GRIK5,KCNJ12,SLC9A5,KCNJ10,CNR1,HCN1,ATP2A1,KCNK12,KCNJ11,STIM2,TTYH3,SLC36A1,TMEM38A,CLCN2,CAC…
GO:MF	gated channel activity	GO:0022836	5.42e-16	15.2661	324	1395	63	25412	GABRD,SNAP25,GRIN2A,KCNC1,KCNA2,KCNA1,CACNA1I,ITPR1,SCN8A,GABRA1,CACNB3,GRIA4,KCNIP3,GABRB2,TTYH1,CACNA2D3,KCNJ6,KCNH1,GLRB,RYR1,SCN1B,GRIN1,KCNQ3,KCNJ9,CACNG2,GABRG2,CACNB4,GRIK5,KCNJ12,KCNJ10,CNR1,HCN1,KCNK12,KCNJ11,TTYH3,TMEM38A,CLCN2,CACNA1A,TRPM4,KCNK2,KCNN2,ITGAV,KCNS2,KCNK1,KCNK9,RYR2,TMEM37,LRRC38,CACNA2D1,HTR1B,SCNN1A,CACNB1,GRIN2C,ASIC1,CACNA2D4,KCNAB1,ITPR2,KCNK3,CACNA1E,KCNN1,GPR89,HC…
GO:MF	ion channel activity	GO:0005216	5.84e-16	15.2338	438	1395	75	25412	GABRD,ANO3,SNAP25,GRIN2A,KCNC1,KCNA2,KCNA1,SLC24A2,CACNA1I,TRPC6,LRRC8B,ITPR1,SCN8A,GABRA1,CACNB3,GRIA4,KCNIP3,GABRB2,TTYH1,CACNA2D3,KCNJ6,KCNH1,GLRB,RYR1,SCN1B,SLC12A5,GRIN1,KCNQ3,KCNJ9,CACNG2,SLC4A11,GABRG2,CACNB4,GRIK5,KCNJ12,KCNJ10,CNR1,HCN1,KCNK12,KCNJ11,STIM2,TTYH3,TMEM38A,CLCN2,CACNA1A,TRPM4,KCNK2,KCNN2,ITGAV,SLC24A3,OTOP2,KCNS2,KCNK1,KCNK9,RYR2,TMEM37,LRRC38,CACNA2D1,HTR1B,SCNN1A,LRRC8C,C…
GO:MF	ion transmembrane transporter activity	GO:0015075	7.15e-16	15.1458	825	1395	111	25412	GABRD,ANO3,SNAP25,GRIN2A,KCNC1,KCNA2,SLC39A10,SLC13A5,KCNA1,SLC24A2,CACNA1I,ATP2B2,TRPC6,LASP1,LRRC8B,ITPR1,ATP1A1,SFXN5,ATP2B1,SCN8A,GABRA1,SLC25A23,CACNB3,SLC30A4,SLC6A1,GRIA4,KCNIP3,GABRB2,TTYH1,CACNA2D3,SLC1A3,TFRC,KCNJ6,SLC23A3,KCNH1,GLRB,SLC25A18,SLC25A37,RYR1,SCN1B,SLC1A2,SLC12A5,GRIN1,KCNQ3,KCNJ9,CACNG2,SLC4A11,GABRG2,CACNB4,ATP1B2,SLCO2A1,GRIK5,KCNJ12,SLC9A5,KCNJ10,CNR1,HCN1,ATP2A1,KCNK1…
GO:MF	cation channel activity	GO:0005261	1.66e-15	14.7801	331	1395	63	25412	SNAP25,GRIN2A,KCNC1,KCNA2,KCNA1,SLC24A2,CACNA1I,TRPC6,ITPR1,SCN8A,CACNB3,GRIA4,KCNIP3,CACNA2D3,KCNJ6,KCNH1,RYR1,SCN1B,SLC12A5,GRIN1,KCNQ3,KCNJ9,CACNG2,SLC4A11,CACNB4,GRIK5,KCNJ12,KCNJ10,CNR1,HCN1,KCNK12,KCNJ11,STIM2,TMEM38A,CACNA1A,TRPM4,KCNK2,KCNN2,ITGAV,SLC24A3,OTOP2,KCNS2,KCNK1,KCNK9,RYR2,TMEM37,LRRC38,CACNA2D1,HTR1B,SCNN1A,CACNB1,GRIN2C,ASIC1,CACNA2D4,ORAI3,KCNAB1,ITPR2,KCNK3,CACNA1E,KCNN1,HC…
GO:MF	transporter activity	GO:0005215	2.54e-15	14.5958	1162	1395	138	25412	GABRD,ANO3,SNAP25,GRIN2A,KCNC1,KCNA2,SLC39A10,SLC13A5,KCNA1,SLC24A2,CACNA1I,ATP2B2,TRPC6,LASP1,LRRC8B,PITPNM2,ITPR1,ATP1A1,SFXN5,ATP2B1,SCN8A,GABRA1,SLC25A23,CACNB3,SLC30A4,ABCD2,SLC35E2,SLC6A1,GRIA4,SLC16A6,KCNIP3,GABRB2,TTYH1,CACNA2D3,OSBP2,SLC1A3,TFRC,KCNJ6,SLC23A3,KCNH1,GLRB,SLC25A18,SLC25A37,RYR1,SCN1B,SLC1A2,SLC12A5,ABCB9,GRIN1,KCNQ3,KCNJ9,CACNG2,SLC4A11,GABRG2,CACNB4,ATP1B2,SLCO2A1,GRIK5,S…
GO:MF	passive transmembrane transporter activity	GO:0022803	3.11e-15	14.5072	481	1395	78	25412	GABRD,ANO3,SNAP25,GRIN2A,KCNC1,KCNA2,KCNA1,SLC24A2,CACNA1I,TRPC6,LRRC8B,ITPR1,SCN8A,GABRA1,CACNB3,GRIA4,KCNIP3,GABRB2,TTYH1,CACNA2D3,KCNJ6,KCNH1,GLRB,RYR1,SCN1B,SLC12A5,GRIN1,KCNQ3,KCNJ9,CACNG2,SLC4A11,GABRG2,CACNB4,GRIK5,KCNJ12,KCNJ10,CNR1,HCN1,KCNK12,KCNJ11,STIM2,TTYH3,TMEM38A,CLCN2,CACNA1A,TRPM4,KCNK2,KCNN2,ITGAV,SLC24A3,OTOP2,KCNS2,KCNK1,KCNK9,RYR2,TMEM37,LRRC38,CACNA2D1,HTR1B,SCNN1A,LRRC8C,C…
GO:MF	channel activity	GO:0015267	3.11e-15	14.5072	481	1395	78	25412	GABRD,ANO3,SNAP25,GRIN2A,KCNC1,KCNA2,KCNA1,SLC24A2,CACNA1I,TRPC6,LRRC8B,ITPR1,SCN8A,GABRA1,CACNB3,GRIA4,KCNIP3,GABRB2,TTYH1,CACNA2D3,KCNJ6,KCNH1,GLRB,RYR1,SCN1B,SLC12A5,GRIN1,KCNQ3,KCNJ9,CACNG2,SLC4A11,GABRG2,CACNB4,GRIK5,KCNJ12,KCNJ10,CNR1,HCN1,KCNK12,KCNJ11,STIM2,TTYH3,TMEM38A,CLCN2,CACNA1A,TRPM4,KCNK2,KCNN2,ITGAV,SLC24A3,OTOP2,KCNS2,KCNK1,KCNK9,RYR2,TMEM37,LRRC38,CACNA2D1,HTR1B,SCNN1A,LRRC8C,C…
GO:MF	voltage-gated ion channel activity	GO:0005244	3.71e-15	14.4306	190	1395	46	25412	SNAP25,GRIN2A,KCNC1,KCNA2,KCNA1,CACNA1I,SCN8A,CACNB3,KCNIP3,CACNA2D3,KCNJ6,KCNH1,RYR1,SCN1B,GRIN1,KCNQ3,KCNJ9,CACNG2,CACNB4,KCNJ12,KCNJ10,CNR1,HCN1,KCNK12,KCNJ11,CLCN2,CACNA1A,TRPM4,KCNK2,KCNN2,ITGAV,KCNS2,KCNK1,KCNK9,TMEM37,LRRC38,CACNA2D1,HTR1B,CACNB1,GRIN2C,CACNA2D4,KCNAB1,KCNK3,CACNA1E,GPR89,HCN2
GO:MF	voltage-gated channel activity	GO:0022832	4.63e-15	14.3342	191	1395	46	25412	SNAP25,GRIN2A,KCNC1,KCNA2,KCNA1,CACNA1I,SCN8A,CACNB3,KCNIP3,CACNA2D3,KCNJ6,KCNH1,RYR1,SCN1B,GRIN1,KCNQ3,KCNJ9,CACNG2,CACNB4,KCNJ12,KCNJ10,CNR1,HCN1,KCNK12,KCNJ11,CLCN2,CACNA1A,TRPM4,KCNK2,KCNN2,ITGAV,KCNS2,KCNK1,KCNK9,TMEM37,LRRC38,CACNA2D1,HTR1B,CACNB1,GRIN2C,CACNA2D4,KCNAB1,KCNK3,CACNA1E,GPR89,HCN2
GO:MF	inorganic cation transmembrane transporter activity	GO:0022890	4.65e-15	14.3327	557	1395	85	25412	SNAP25,GRIN2A,KCNC1,KCNA2,SLC39A10,SLC13A5,KCNA1,SLC24A2,CACNA1I,ATP2B2,TRPC6,ITPR1,ATP1A1,ATP2B1,SCN8A,CACNB3,SLC30A4,SLC6A1,GRIA4,KCNIP3,CACNA2D3,SLC1A3,TFRC,KCNJ6,KCNH1,SLC25A37,RYR1,SCN1B,SLC1A2,SLC12A5,GRIN1,KCNQ3,KCNJ9,CACNG2,SLC4A11,CACNB4,ATP1B2,GRIK5,KCNJ12,SLC9A5,KCNJ10,CNR1,HCN1,ATP2A1,KCNK12,KCNJ11,STIM2,SLC36A1,TMEM38A,CACNA1A,SLC4A4,TRPM4,KCNK2,KCNN2,ITGAV,SLC24A3,SLC28A1,OTOP2,KCNS…
GO:MF	protein kinase binding	GO:0019901	9.92e-15	14.0033	751	1395	102	25412	MAPK4,SIPA1L1,PPME1,SMAD3,MAPK6,GRIN2A,CD6,TUBA4A,PRKCB,CALM1,PLCB4,DLG4,PITPNM2,ATP1A1,CACNB3,PPP1R9A,CDK5R2,DAB2IP,STX1B,AKT2,MYO5A,IQSEC1,PTN,CRY2,DUSP1,TFRC,KCNH1,CADM4,CNKSR2,ADAM9,DACT3,SLC12A5,BRSK2,SIRPA,PRKAR1B,PRKCZ,PTK2,DOCK4,FERMT2,SRCIN1,KCNQ3,STXBP1,HDAC4,CACNB4,MAPK9,SYNGAP1,MICAL2,FOXO3,PIN1,CIT,APC,AGAP2,ARRB1,SRC,CDK5R1,TBR1,TRIB1,PRKCE,TOM1L2,NTRK2,LRP4,RB1CC1,MAPK14,DUSP3,PHYH…
GO:MF	kinase binding	GO:0019900	2.29e-14	13.6403	841	1395	109	25412	MAPK4,SIPA1L1,PPME1,SMAD3,MAPK6,GRIN2A,CD6,TUBA4A,PRKCB,CALM1,PLCB4,DLG4,PITPNM2,ATP1A1,CACNB3,PPP1R9A,CDK5R2,DAB2IP,STX1B,AKT2,MYO5A,IQSEC1,PTN,CRY2,DUSP1,TFRC,KCNH1,CADM4,CNKSR2,PPP1R9B,ADAM9,DACT3,WWC1,SLC12A5,BRSK2,SIRPA,PRKAR1B,PRKCZ,PTK2,DOCK4,FERMT2,SRCIN1,KCNQ3,STXBP1,HDAC4,CACNB4,MAPK9,SYNGAP1,MICAL2,FOXO3,PIN1,CIT,APC,IGSF9B,AGAP2,ARRB1,SRC,CDK5R1,TBR1,TRIB1,PRKCE,TOM1L2,NTRK2,LRP4,LDHB…
GO:MF	actin filament binding	GO:0051015	2.41e-14	13.6184	215	1395	48	25412	SIPA1L1,TNNC1,MYL4,LASP1,PPP1R9A,MYO5C,PKNOX2,SYNE1,MYO5A,SPTBN2,MYH7B,DMTN,MYO18A,SPTB,ACTN4,PPP1R9B,MYH2,FERMT2,CTNNA2,MYO1E,TPM1,CORO2A,SHROOM3,CDK5R1,EPS8L2,CORO2B,FMNL1,MYH10,GAS2L1,ACTN1,MYH7,MYO6,MYH4,MICAL3,ACTR3B,UTRN,MYO1B,EGFR,TRIOBP,TWF2,FSCN1,ESPNL,MPRIP,TLN2,MYH1,ADD2,PSTPIP2,MYH9
GO:MF	cation transmembrane transporter activity	GO:0008324	3.5e-14	13.4556	608	1395	88	25412	SNAP25,GRIN2A,KCNC1,KCNA2,SLC39A10,SLC13A5,KCNA1,SLC24A2,CACNA1I,ATP2B2,TRPC6,ITPR1,ATP1A1,ATP2B1,SCN8A,CACNB3,SLC30A4,SLC6A1,GRIA4,KCNIP3,CACNA2D3,SLC1A3,TFRC,KCNJ6,KCNH1,SLC25A37,RYR1,SCN1B,SLC1A2,SLC12A5,GRIN1,KCNQ3,KCNJ9,CACNG2,SLC4A11,CACNB4,ATP1B2,GRIK5,KCNJ12,SLC9A5,KCNJ10,CNR1,HCN1,ATP2A1,KCNK12,KCNJ11,STIM2,MFSD12,SLC36A1,TMEM38A,CACNA1A,SLC4A4,TRPM4,KCNK2,KCNN2,ITGAV,SLC24A3,SLC28A1,OTO…
GO:MF	phosphotransferase activity, alcohol group as acceptor	GO:0016773	3.99e-14	13.3993	698	1395	96	25412	MAPK4,CAMKK2,DGKZ,MAPK6,NLK,ETNK2,PRKCB,HKDC1,PAK1,CAMK4,MAST3,GUCY2G,LMTK2,TYRO3,PIP5K1C,OBSCN,CDK16,ERBB4,PIP5K1B,AKT2,MYLK3,CDK19,RASSF2,LRRK2,MAPK10,PPP1R9B,FN3K,BRSK2,HUNK,PRKCZ,PIP4K2C,MERTK,PTK2,CSNK1G2,FGFRL1,FGFR3,MAPK9,CAMK1G,PRKCA,WNK2,MAPK12,CIT,SRC,HIPK3,MAP3K9,TRIB1,PRKCE,TTBK1,NTRK2,MARK2,MAP3K14,ACVR1C,RPS6KA2,MAPK14,EPHA8,BRSK1,PIM1,CDKL5,MELK,CDC42BPA,ENG,ACVRL1,PTK7,DCLK1,CERK,…
GO:MF	nucleoside-triphosphatase regulator activity	GO:0060589	4.13e-14	13.3836	441	1395	72	25412	PLCB1,STARD8,SIPA1L1,GIT1,ASAP1,RGS20,ARHGEF17,RAP1GAP2,DOCK3,ACAP3,IQSEC2,ARHGEF9,ARHGAP10,RGS7,OBSCN,TBC1D30,ARAP2,RASGEF1B,RAPGEFL1,DAB2IP,IQSEC1,RAPGEF4,ADAP1,FARP1,TBC1D22A,CCDC88C,FGD6,RASGRP1,PREX2,ARHGEF10L,LRRK2,ACAP2,SIRPA,NET1,RASGEF1A,DOCK4,CPEB2,RASAL2,GARNL3,SYNGAP1,TBC1D24,ADRB1,AGAP2,ARRB1,ASAP2,STXBP5L,PSD3,EPS8L2,RASGEF1C,RANBP2,RAP1GDS1,SH3BP1,MADD,GIPC1,ARHGAP42,PREX1,FNIP1,AR…
GO:MF	GTPase regulator activity	GO:0030695	4.13e-14	13.3836	441	1395	72	25412	PLCB1,STARD8,SIPA1L1,GIT1,ASAP1,RGS20,ARHGEF17,RAP1GAP2,DOCK3,ACAP3,IQSEC2,ARHGEF9,ARHGAP10,RGS7,OBSCN,TBC1D30,ARAP2,RASGEF1B,RAPGEFL1,DAB2IP,IQSEC1,RAPGEF4,ADAP1,FARP1,TBC1D22A,CCDC88C,FGD6,RASGRP1,PREX2,ARHGEF10L,LRRK2,ACAP2,SIRPA,NET1,RASGEF1A,DOCK4,CPEB2,RASAL2,GARNL3,SYNGAP1,TBC1D24,ADRB1,AGAP2,ARRB1,ASAP2,STXBP5L,PSD3,EPS8L2,RASGEF1C,RANBP2,RAP1GDS1,SH3BP1,MADD,GIPC1,ARHGAP42,PREX1,FNIP1,AR…
GO:MF	voltage-gated cation channel activity	GO:0022843	4.51e-14	13.3459	140	1395	38	25412	SNAP25,GRIN2A,KCNC1,KCNA2,KCNA1,CACNA1I,CACNB3,CACNA2D3,KCNJ6,KCNH1,RYR1,GRIN1,KCNQ3,KCNJ9,CACNG2,CACNB4,KCNJ12,KCNJ10,CNR1,HCN1,KCNJ11,CACNA1A,KCNK2,KCNN2,ITGAV,KCNS2,KCNK1,KCNK9,LRRC38,CACNA2D1,HTR1B,CACNB1,GRIN2C,CACNA2D4,KCNAB1,KCNK3,CACNA1E,HCN2
GO:MF	kinase activity	GO:0016301	3.37e-13	12.4727	779	1395	101	25412	MAPK4,CAMKK2,DGKZ,MAPK6,NLK,ETNK2,PRKCB,HKDC1,PAK1,CAMK4,MAST3,GUCY2G,LMTK2,TYRO3,PIP5K1C,OBSCN,CDK16,ERBB4,PIP5K1B,AKT2,MYLK3,CDK19,MPP3,RASSF2,LRRK2,MAPK10,PPP1R9B,FN3K,PI4KA,BRSK2,HUNK,PRKCZ,PIP4K2C,MERTK,PTK2,CSNK1G2,FGFRL1,FGFR3,MAPK9,CKB,CAMK1G,PRKCA,WNK2,MAPK12,CIT,SRC,CDK5R1,HIPK3,MAP3K9,TRIB1,PRKCE,TTBK1,NTRK2,MARK2,MAP3K14,ACVR1C,RPS6KA2,MAPK14,EPHA8,BRSK1,PIM1,CDKL5,MELK,CDC42BPA,ENG,A…
GO:MF	molecular function regulator activity	GO:0098772	3.39e-13	12.4697	1951	1395	192	25412	LYNX1,ARPP19,PLCB1,STARD8,FBXW7,DGKZ,SIPA1L1,GIT1,ASAP1,LY6E,RGS20,PTPN3,GRM2,NBL1,ARHGEF17,PRKCB,CALM1,WNT4,WNT9A,FGF9,ITPR1,CCNG1,RAP1GAP2,DOCK3,APLN,ACAP3,LMTK2,LYPD6,IQSEC2,ARHGEF9,PPP2R2C,ARHGAP10,CACNB3,RGS7,OBSCN,PHACTR1,NRXN1,TBC1D30,ARAP2,RASGEF1B,DKKL1,CDK5R2,RAPGEFL1,RASL10A,DAB2IP,KCNIP3,IQSEC1,PTN,PACSIN3,RAPGEF4,PPP1R37,ADAP1,FARP1,INCENP,PPP3R1,TBC1D22A,CCDC88C,CLEC11A,MRAS,FGD6,EF…
GO:MF	transmembrane transporter activity	GO:0022857	4.07e-13	12.3903	1071	1395	125	25412	GABRD,ANO3,SNAP25,GRIN2A,KCNC1,KCNA2,SLC39A10,SLC13A5,KCNA1,SLC24A2,CACNA1I,ATP2B2,TRPC6,LASP1,LRRC8B,ITPR1,ATP1A1,SFXN5,ATP2B1,SCN8A,GABRA1,SLC25A23,CACNB3,SLC30A4,ABCD2,SLC35E2,SLC6A1,GRIA4,SLC16A6,KCNIP3,GABRB2,TTYH1,CACNA2D3,SLC1A3,TFRC,KCNJ6,SLC23A3,KCNH1,GLRB,SLC25A18,SLC25A37,RYR1,SCN1B,SLC1A2,SLC12A5,ABCB9,GRIN1,KCNQ3,KCNJ9,CACNG2,SLC4A11,GABRG2,CACNB4,ATP1B2,SLCO2A1,GRIK5,SLC35C1,KCNJ12,…
GO:MF	protein kinase activity	GO:0004672	7.19e-13	12.143	594	1395	84	25412	MAPK4,CAMKK2,MAPK6,NLK,PRKCB,PAK1,CAMK4,MAST3,GUCY2G,LMTK2,TYRO3,OBSCN,CDK16,ERBB4,AKT2,MYLK3,CDK19,RASSF2,LRRK2,MAPK10,PPP1R9B,BRSK2,HUNK,PRKCZ,MERTK,PTK2,CSNK1G2,FGFRL1,FGFR3,MAPK9,CAMK1G,PRKCA,WNK2,MAPK12,CIT,SRC,HIPK3,MAP3K9,TRIB1,PRKCE,TTBK1,NTRK2,MARK2,MAP3K14,ACVR1C,RPS6KA2,MAPK14,EPHA8,BRSK1,PIM1,CDKL5,MELK,CDC42BPA,ENG,ACVRL1,PTK7,DCLK1,RPS6KA3,MKNK2,KSR2,NTRK3,SRPK1,AXL,IGF1R,STRADB,MAP…
GO:MF	small molecule binding	GO:0036094	7.33e-13	12.1347	2561	1395	234	25412	MAPK4,TTL,RPH3A,ADCY9,CAMKK2,DGKZ,MAPK6,GRIN2A,NLK,ETNK2,TUBA4A,PRKCB,HKDC1,RASD1,TTLL11,ATP2B2,TRPC6,PAK1,CAMK4,ADCY1,ITPR1,ATP1A1,MAST3,ATP2B1,KIF5C,AIFM3,GUCY2G,ADORA1,LMTK2,ASTN2,TYRO3,PIP5K1C,OBSCN,ABCD2,RAB6B,MYO5C,CDK16,ERBB4,PIP5K1B,GNL1,RASL10A,AKT2,MYO5A,MYLK3,RAPGEF4,OSBP2,CRY2,SLC1A3,ARF3,CDK19,MYH7B,HSPA1B,CXXC5,HSD11B1,MRAS,GLRB,E030003E18RIK,DIRAS2,RYR1,MYO18A,ACTN4,LRRK2,MAPK10,GF…
GO:MF	adenyl ribonucleotide binding	GO:0032559	1.41e-12	11.8512	1556	1395	161	25412	MAPK4,TTL,ADCY9,CAMKK2,DGKZ,MAPK6,NLK,ETNK2,PRKCB,HKDC1,TTLL11,ATP2B2,PAK1,CAMK4,ADCY1,ATP1A1,MAST3,ATP2B1,KIF5C,GUCY2G,LMTK2,TYRO3,PIP5K1C,OBSCN,ABCD2,MYO5C,CDK16,ERBB4,PIP5K1B,AKT2,MYO5A,MYLK3,RAPGEF4,CDK19,MYH7B,HSPA1B,RYR1,MYO18A,LRRK2,MAPK10,FN3K,ACSL6,MYH2,BRSK2,HUNK,PRKAR1B,PRKCZ,PIP4K2C,MERTK,PTK2,ABCB9,CSNK1G2,MYO1E,FGFR3,NAV3,UBE2G1,MAPK9,CKB,CAMK1G,PRKCA,KCNJ10,ATAD2,TTLL3,WNK2,SWAP70,…
GO:MF	protein serine/threonine/tyrosine kinase activity	GO:0004712	1.56e-12	11.8078	430	1395	68	25412	MAPK4,CAMKK2,MAPK6,NLK,PRKCB,PAK1,MAST3,LMTK2,TYRO3,OBSCN,CDK16,ERBB4,AKT2,CDK19,LRRK2,BRSK2,HUNK,PRKCZ,MERTK,PTK2,CSNK1G2,FGFR3,MAPK9,CAMK1G,PRKCA,WNK2,MAPK12,CIT,SRC,HIPK3,MAP3K9,PRKCE,TTBK1,NTRK2,MARK2,MAP3K14,RPS6KA2,MAPK14,EPHA8,BRSK1,PIM1,CDKL5,MELK,CDC42BPA,DCLK1,RPS6KA3,MKNK2,NTRK3,SRPK1,AXL,IGF1R,MAP3K10,PDPK1,ROCK2,AKT3,STK35,EGFR,CDK17,STK40,PHKG1,MAPK11,MAST2,HIPK2,EPHB1,NUAK1,STK19,S…
GO:MF	protein-containing complex binding	GO:0044877	1.99e-12	11.7014	1522	1395	158	25412	RPH3A,SIPA1L1,GIT1,SMAD3,TNNC1,GRIN2A,PDP1,MYL4,LASP1,DLG4,JDP2,PAK1,WFS1,ITPR1,PPP3CA,BOK,DLGAP1,ADORA1,RTN4R,NRXN1,PPP1R9A,MYO5C,PKNOX2,SORT1,MAF,SYNE1,DAB2IP,MYO5A,PTN,SHANK1,RAPGEF4,SPTBN2,MAP1A,MYH7B,TFRC,KCNH1,DMTN,GLRB,SHANK3,HOMER1,MYO18A,SPTB,ACTN4,ATMIN,LRRK2,SACS,PPP1R9B,ERC2,ADAM9,MYH2,HR,PRKCZ,APBB1,PTK2,FERMT2,CTNNA2,GRIN1,MYO1E,H2-T23,CPEB2,FCHO1,ANK1,PTPRZ1,TPM1,HOMER2,CORO2A,APC,…
GO:MF	protein domain specific binding	GO:0019904	2.32e-12	11.6342	814	1395	102	25412	AFAP1L1,LZTS3,WHRN,NOS1AP,SNAP25,SORBS2,NLK,CALM1,KCNA1,ATP2B2,DLG4,JDP2,ITPR1,ATP1A1,ZMYND8,PLXND1,BOK,DLGAP3,DLGAP1,SENP2,ATP2B1,FMN1,PPP1R9A,DAB2IP,STX1B,MYO5A,INPPL1,CNTNAP1,SHANK1,MPP3,PPP3R1,HSPA1B,PRRT2,CCDC88C,SHANK3,ZBTB16,BHLHE40,ERC2,ADAM9,SIRPA,PTK2,DOCK4,ARR3,ARHGAP5,SRCIN1,STXBP1,FZD3,KCNJ9,POU2F2,GRIK5,KCNJ12,SYNGAP1,BAIAP2,TPM1,ETV6,HOMER2,CIT,DAB1,ADRB1,TACC1,EGR2,STRN4,SRC,TRAK1…
GO:MF	adenyl nucleotide binding	GO:0030554	3.09e-12	11.5095	1570	1395	161	25412	MAPK4,TTL,ADCY9,CAMKK2,DGKZ,MAPK6,NLK,ETNK2,PRKCB,HKDC1,TTLL11,ATP2B2,PAK1,CAMK4,ADCY1,ATP1A1,MAST3,ATP2B1,KIF5C,GUCY2G,LMTK2,TYRO3,PIP5K1C,OBSCN,ABCD2,MYO5C,CDK16,ERBB4,PIP5K1B,AKT2,MYO5A,MYLK3,RAPGEF4,CDK19,MYH7B,HSPA1B,RYR1,MYO18A,LRRK2,MAPK10,FN3K,ACSL6,MYH2,BRSK2,HUNK,PRKAR1B,PRKCZ,PIP4K2C,MERTK,PTK2,ABCB9,CSNK1G2,MYO1E,FGFR3,NAV3,UBE2G1,MAPK9,CKB,CAMK1G,PRKCA,KCNJ10,ATAD2,TTLL3,WNK2,SWAP70,…
GO:MF	calmodulin binding	GO:0005516	4.95e-12	11.3054	184	1395	41	25412	MAP6D1,PLCB1,CAMKK2,ARPP21,ATP2B2,WFS1,ADCY1,PPP3CA,ATP2B1,OBSCN,MYO5A,KCNH1,SYT1,RYR1,GRIN1,KCNQ3,MYO1E,ESRRG,CAMK1G,STRN4,UNC13A,CACNA1A,TRPM4,MYH10,AKAP5,KCNN2,MYH7,UNC13B,MKNK2,RYR2,MYH4,SNTB2,MYO1B,SLC8A2,CAMSAP1,EGFR,PHKG1,MYH1,ADD2,KCNN1,MYH9
GO:MF	ATP binding	GO:0005524	5.34e-12	11.2722	1486	1395	154	25412	MAPK4,TTL,ADCY9,CAMKK2,DGKZ,MAPK6,NLK,ETNK2,PRKCB,HKDC1,TTLL11,ATP2B2,PAK1,CAMK4,ADCY1,ATP1A1,MAST3,ATP2B1,KIF5C,GUCY2G,LMTK2,TYRO3,PIP5K1C,OBSCN,ABCD2,MYO5C,CDK16,ERBB4,PIP5K1B,AKT2,MYO5A,MYLK3,CDK19,MYH7B,HSPA1B,RYR1,MYO18A,LRRK2,MAPK10,FN3K,ACSL6,MYH2,BRSK2,HUNK,PRKCZ,PIP4K2C,MERTK,PTK2,ABCB9,CSNK1G2,MYO1E,FGFR3,NAV3,UBE2G1,MAPK9,CKB,CAMK1G,PRKCA,KCNJ10,ATAD2,TTLL3,WNK2,SWAP70,MAPK12,NWD1,ACSS…
GO:MF	carbohydrate derivative binding	GO:0097367	6.12e-12	11.2131	2278	1395	211	25412	MAPK4,TTL,ADCY9,CAMKK2,DGKZ,MAPK6,NLK,ETNK2,CD6,TUBA4A,PRKCB,HKDC1,RASD1,TTLL11,ATP2B2,PAK1,FGF9,CAMK4,ADCY1,ATP1A1,MAST3,LRTM2,ATP2B1,KIF5C,GUCY2G,ADORA1,RTN4R,LMTK2,TYRO3,PIP5K1C,OBSCN,ABCD2,RAB6B,MYO5C,CDK16,ERBB4,PIP5K1B,GNL1,RASL10A,AKT2,MYO5A,MYLK3,PTN,RAPGEF4,ARF3,CDK19,MYH7B,HSPA1B,RTN4RL1,MRAS,DIRAS2,RYR1,MYO18A,ACTN4,LRRK2,MAPK10,FN3K,ACSL6,MYH2,BRSK2,HUNK,PRKAR1B,PRKCZ,PIP4K2C,MERTK,PT…
GO:MF	anion binding	GO:0043168	6.98e-12	11.1564	2439	1395	222	25412	MAPK4,TTL,RPH3A,ADCY9,PLCB1,CAMKK2,DGKZ,ASAP1,MAPK6,GRIN2A,NLK,ETNK2,TUBA4A,PRKCB,HKDC1,RASD1,TTLL11,ATP2B2,TRPC6,PAK1,CAMK4,ADCY1,ITPR1,ATP1A1,MAST3,ATP2B1,KIF5C,AIFM3,GUCY2G,RTN4R,LMTK2,ASTN2,TYRO3,PIP5K1C,OBSCN,ABCD2,RAB6B,MYO5C,ARAP2,CDK16,ERBB4,PIP5K1B,GNL1,RASL10A,AKT2,MYO5A,INPPL1,MYLK3,RAPGEF4,CRY2,SLC1A3,ARF3,CDK19,MYH7B,HSPA1B,MRAS,GLRB,SYT1,DIRAS2,RYR1,MYO18A,LRRK2,MAPK10,FN3K,ACSL6,AC…
GO:MF	structural constituent of synapse	GO:0098918	1.04e-11	10.9832	30	1395	17	25412	GIT1,DLG4,BSN,DLGAP1,SHANK1,SPTBN2,SHANK3,HOMER1,ERC2,PCLO,MAGI2,NEFH,MPP2,DLG1,ACTN1,SHANK2,INA
GO:MF	signaling receptor binding	GO:0005102	2.8e-11	10.5522	1679	1395	166	25412	LYNX1,ARPP19,SIPA1L1,LY6E,SMAD3,GRIN2A,NBL1,CALM1,WNT4,WNT9A,LINGO1,ATP2B2,SEC14L1,DLG4,PITPNM2,FGF9,NTN5,TRIM37,LRTM2,BOK,S1PR1,KIF5C,APLN,ADORA1,RTN4R,SYNDIG1,LIFR,NRXN1,NETO2,DKKL1,ERBB4,SMARCD1,DAB2IP,STX1B,PTN,SHANK1,MAP1A,HSPA1B,RTN4RL1,CCDC88C,PTPRD,CLEC11A,DMTN,CADM4,EFNA5,SYT1,SHANK3,HOMER1,NPTN,PPP1R9B,ADAM9,CXCL14,PTK2,DOCK4,FERMT2,ABCB9,ARR3,GRIN1,ADRA2C,H2-T23,CACNG2,IL12A,HBEGF,PTPR…
GO:MF	purine ribonucleotide binding	GO:0032555	3.47e-11	10.4594	1919	1395	183	25412	MAPK4,TTL,ADCY9,CAMKK2,DGKZ,MAPK6,NLK,ETNK2,TUBA4A,PRKCB,HKDC1,RASD1,TTLL11,ATP2B2,PAK1,CAMK4,ADCY1,ATP1A1,MAST3,ATP2B1,KIF5C,GUCY2G,LMTK2,TYRO3,PIP5K1C,OBSCN,ABCD2,RAB6B,MYO5C,CDK16,ERBB4,PIP5K1B,GNL1,RASL10A,AKT2,MYO5A,MYLK3,RAPGEF4,ARF3,CDK19,MYH7B,HSPA1B,MRAS,DIRAS2,RYR1,MYO18A,LRRK2,MAPK10,FN3K,ACSL6,MYH2,BRSK2,HUNK,PRKAR1B,PRKCZ,PIP4K2C,MERTK,PTK2,ABCB9,ARHGAP5,CSNK1G2,MYO1E,FGFR3,NAV3,UBE2…
GO:MF	purine nucleotide binding	GO:0017076	7.07e-11	10.1503	1934	1395	183	25412	MAPK4,TTL,ADCY9,CAMKK2,DGKZ,MAPK6,NLK,ETNK2,TUBA4A,PRKCB,HKDC1,RASD1,TTLL11,ATP2B2,PAK1,CAMK4,ADCY1,ATP1A1,MAST3,ATP2B1,KIF5C,GUCY2G,LMTK2,TYRO3,PIP5K1C,OBSCN,ABCD2,RAB6B,MYO5C,CDK16,ERBB4,PIP5K1B,GNL1,RASL10A,AKT2,MYO5A,MYLK3,RAPGEF4,ARF3,CDK19,MYH7B,HSPA1B,MRAS,DIRAS2,RYR1,MYO18A,LRRK2,MAPK10,FN3K,ACSL6,MYH2,BRSK2,HUNK,PRKAR1B,PRKCZ,PIP4K2C,MERTK,PTK2,ABCB9,ARHGAP5,CSNK1G2,MYO1E,FGFR3,NAV3,UBE2…
GO:MF	ribonucleotide binding	GO:0032553	8.53e-11	10.0688	1938	1395	183	25412	MAPK4,TTL,ADCY9,CAMKK2,DGKZ,MAPK6,NLK,ETNK2,TUBA4A,PRKCB,HKDC1,RASD1,TTLL11,ATP2B2,PAK1,CAMK4,ADCY1,ATP1A1,MAST3,ATP2B1,KIF5C,GUCY2G,LMTK2,TYRO3,PIP5K1C,OBSCN,ABCD2,RAB6B,MYO5C,CDK16,ERBB4,PIP5K1B,GNL1,RASL10A,AKT2,MYO5A,MYLK3,RAPGEF4,ARF3,CDK19,MYH7B,HSPA1B,MRAS,DIRAS2,RYR1,MYO18A,LRRK2,MAPK10,FN3K,ACSL6,MYH2,BRSK2,HUNK,PRKAR1B,PRKCZ,PIP4K2C,MERTK,PTK2,ABCB9,ARHGAP5,CSNK1G2,MYO1E,FGFR3,NAV3,UBE2…
GO:MF	transferase activity, transferring phosphorus-containing groups	GO:0016772	1.22e-10	9.91208	928	1395	107	25412	MAPK4,CAMKK2,DGKZ,MAPK6,NLK,ETNK2,PRKCB,HKDC1,PAK1,CAMK4,MAST3,GUCY2G,LMTK2,TYRO3,PIP5K1C,OBSCN,CDK16,ERBB4,PIP5K1B,AKT2,MYLK3,CDK19,MPP3,RASSF2,CDS1,LRRK2,MAPK10,PPP1R9B,FN3K,PI4KA,BRSK2,HUNK,PRKCZ,PIP4K2C,MERTK,PTK2,CSNK1G2,FGFRL1,FGFR3,MAPK9,CKB,CAMK1G,PRKCA,WNK2,MAPK12,CIT,SRC,CDK5R1,HIPK3,MAP3K9,TRIB1,PRKCE,TTBK1,NTRK2,MARK2,MAP3K14,ACVR1C,RPS6KA2,MAPK14,EPHA8,BRSK1,PGS1,PIM1,CDKL5,MELK,CDC4…
GO:MF	purine ribonucleoside triphosphate binding	GO:0035639	1.6e-10	9.79485	1839	1395	175	25412	MAPK4,TTL,ADCY9,CAMKK2,DGKZ,MAPK6,NLK,ETNK2,TUBA4A,PRKCB,HKDC1,RASD1,TTLL11,ATP2B2,PAK1,CAMK4,ADCY1,ATP1A1,MAST3,ATP2B1,KIF5C,GUCY2G,LMTK2,TYRO3,PIP5K1C,OBSCN,ABCD2,RAB6B,MYO5C,CDK16,ERBB4,PIP5K1B,GNL1,RASL10A,AKT2,MYO5A,MYLK3,ARF3,CDK19,MYH7B,HSPA1B,MRAS,DIRAS2,RYR1,MYO18A,LRRK2,MAPK10,FN3K,ACSL6,MYH2,BRSK2,HUNK,PRKCZ,PIP4K2C,MERTK,PTK2,ABCB9,ARHGAP5,CSNK1G2,MYO1E,FGFR3,NAV3,UBE2G1,MAPK9,CKB,CAM…
GO:MF	nucleotide binding	GO:0000166	2.3e-10	9.63829	2188	1395	199	25412	MAPK4,TTL,ADCY9,CAMKK2,DGKZ,MAPK6,NLK,ETNK2,TUBA4A,PRKCB,HKDC1,RASD1,TTLL11,ATP2B2,PAK1,CAMK4,ADCY1,ATP1A1,MAST3,ATP2B1,KIF5C,AIFM3,GUCY2G,LMTK2,TYRO3,PIP5K1C,OBSCN,ABCD2,RAB6B,MYO5C,CDK16,ERBB4,PIP5K1B,GNL1,RASL10A,AKT2,MYO5A,MYLK3,RAPGEF4,CRY2,ARF3,CDK19,MYH7B,HSPA1B,CXXC5,HSD11B1,MRAS,E030003E18RIK,DIRAS2,RYR1,MYO18A,LRRK2,MAPK10,GFOD1,FN3K,ACSL6,MYH2,BRSK2,HUNK,PRKAR1B,PRKCZ,PIP4K2C,MERTK,PTK…
GO:MF	nucleoside phosphate binding	GO:1901265	2.3e-10	9.63829	2188	1395	199	25412	MAPK4,TTL,ADCY9,CAMKK2,DGKZ,MAPK6,NLK,ETNK2,TUBA4A,PRKCB,HKDC1,RASD1,TTLL11,ATP2B2,PAK1,CAMK4,ADCY1,ATP1A1,MAST3,ATP2B1,KIF5C,AIFM3,GUCY2G,LMTK2,TYRO3,PIP5K1C,OBSCN,ABCD2,RAB6B,MYO5C,CDK16,ERBB4,PIP5K1B,GNL1,RASL10A,AKT2,MYO5A,MYLK3,RAPGEF4,CRY2,ARF3,CDK19,MYH7B,HSPA1B,CXXC5,HSD11B1,MRAS,E030003E18RIK,DIRAS2,RYR1,MYO18A,LRRK2,MAPK10,GFOD1,FN3K,ACSL6,MYH2,BRSK2,HUNK,PRKAR1B,PRKCZ,PIP4K2C,MERTK,PTK…
GO:MF	transmembrane transporter binding	GO:0044325	2.43e-10	9.61513	146	1395	34	25412	SNAP25,KCNC1,CALM1,RIMS3,ITPR1,DPP10,PPP1R9A,KCNIP3,KCNH1,RIMS4,HOMER1,SCN1B,ACTN4,NPTN,LRRK2,PPP1R9B,KCNQ3,ANK1,ARRB1,SRC,KCNJ11,HTT,MPP2,DLG1,ACTN1,LRRC38,FMR1,ANK2,KCNAB1,AKAP6,ITPR2,ANK3,ABCC8,HERPUD1
GO:MF	potassium ion transmembrane transporter activity	GO:0015079	2.91e-10	9.53591	155	1395	35	25412	SNAP25,KCNC1,KCNA2,KCNA1,SLC24A2,ATP1A1,KCNIP3,KCNJ6,KCNH1,SLC12A5,KCNQ3,KCNJ9,ATP1B2,GRIK5,KCNJ12,SLC9A5,KCNJ10,HCN1,KCNK12,KCNJ11,TMEM38A,KCNK2,KCNN2,SLC24A3,KCNS2,ATP1A2,KCNK1,KCNK9,LRRC38,KCNAB1,KCNK3,KCNN1,HCN2,ABCC8,GRIK3
GO:MF	calcium ion binding	GO:0005509	3e-10	9.52303	720	1395	89	25412	EFHD2,RPH3A,PLCB1,CAMKK2,TNNC1,SYT2,PDP1,CALM1,PLCB4,HEG1,MYL4,ATP2B2,SCUBE1,PITPNM2,ITPR1,MAN1C1,SLC25A23,ASTN2,NRXN1,FSTL4,KCNIP3,MYO5A,MAN1A2,TTYH1,PPP3R1,EFCAB6,CLSTN1,SYT1,RASGRP1,PLCH2,RYR1,TESC,OTOF,ACTN4,C1RA,SYT12,RAB11FIP4,PCDHAC1,GRIN1,PCLO,CABP7,ATP2A1,CDK5R1,FAT3,STIM2,CDH12,CELSR2,LRP4,SYT13,UNC13A,LRP1,TRPM4,MELK,SMOC2,NKD1,PVALB,ACTN1,CDH22,NCAN,NOTCH4,UNC13B,CDH11,USP32,CALB1,RYR…
GO:MF	protein serine kinase activity	GO:0106310	3.13e-10	9.50505	341	1395	55	25412	MAPK4,CAMKK2,MAPK6,NLK,PRKCB,PAK1,MAST3,LMTK2,OBSCN,CDK16,AKT2,CDK19,LRRK2,MAPK10,BRSK2,HUNK,PRKCZ,CSNK1G2,MAPK9,CAMK1G,PRKCA,WNK2,MAPK12,CIT,HIPK3,MAP3K9,PRKCE,TTBK1,MARK2,MAP3K14,RPS6KA2,MAPK14,BRSK1,PIM1,CDKL5,MELK,CDC42BPA,DCLK1,RPS6KA3,MKNK2,SRPK1,MAP3K10,PDPK1,ROCK2,AKT3,STK35,CDK17,STK40,PHKG1,MAPK11,MAST2,HIPK2,NUAK1,STK19,ALPK2
GO:MF	enzyme regulator activity	GO:0030234	1.01e-09	8.99622	1206	1395	126	25412	ARPP19,PLCB1,STARD8,FBXW7,DGKZ,SIPA1L1,GIT1,ASAP1,RGS20,ARHGEF17,CALM1,CCNG1,RAP1GAP2,DOCK3,ACAP3,LMTK2,IQSEC2,ARHGEF9,PPP2R2C,ARHGAP10,RGS7,OBSCN,PHACTR1,TBC1D30,ARAP2,RASGEF1B,CDK5R2,RAPGEFL1,DAB2IP,IQSEC1,PTN,RAPGEF4,PPP1R37,ADAP1,FARP1,INCENP,PPP3R1,TBC1D22A,CCDC88C,FGD6,RASGRP1,PREX2,ARHGEF10L,TESC,LRRK2,PPP1R9B,ACAP2,SIRPA,PRKAR1B,NET1,RASGEF1A,DOCK4,MAT2B,CPEB2,RASAL2,GARNL3,HBEGF,MAPK9,SY…
GO:MF	protein serine/threonine kinase activity	GO:0004674	1.27e-09	8.89598	438	1395	63	25412	MAPK4,CAMKK2,MAPK6,NLK,PRKCB,PAK1,CAMK4,MAST3,LMTK2,OBSCN,CDK16,AKT2,MYLK3,CDK19,LRRK2,MAPK10,BRSK2,HUNK,PRKCZ,CSNK1G2,MAPK9,CAMK1G,PRKCA,WNK2,MAPK12,CIT,HIPK3,MAP3K9,PRKCE,TTBK1,MARK2,MAP3K14,ACVR1C,RPS6KA2,MAPK14,BRSK1,PIM1,CDKL5,MELK,CDC42BPA,ENG,ACVRL1,DCLK1,RPS6KA3,MKNK2,SRPK1,MAP3K10,PDPK1,ROCK2,AKT3,STK35,CDK17,STK40,PHKG1,MAPK11,MAST2,HIPK2,GRK5,NUAK1,IRAK2,STK19,SYK,ALPK2
GO:MF	calcium ion transmembrane transporter activity	GO:0015085	1.64e-09	8.7854	131	1395	31	25412	GRIN2A,SLC24A2,CACNA1I,ATP2B2,TRPC6,ITPR1,ATP2B1,CACNB3,CACNA2D3,RYR1,GRIN1,CACNG2,CACNB4,CNR1,ATP2A1,STIM2,CACNA1A,TRPM4,ITGAV,SLC24A3,RYR2,TMEM37,CACNA2D1,SLC8A2,HTR1B,CACNB1,GRIN2C,CACNA2D4,ORAI3,ITPR2,CACNA1E
GO:MF	catalytic activity, acting on a protein	GO:0140096	3.1e-09	8.5089	2309	1395	203	25412	MAPK4,ENDOU,TTL,FBXW7,CAMKK2,PPME1,PTPN3,MAPK6,NLK,PDP1,PRKCB,DUSP7,TTLL11,BAP1,PAK1,HERC6,CAMK4,MAST3,TRIM37,PPP3CA,SENP2,ZDHHC8,DUSP14,GUCY2G,DPP8,GALNT18,LMTK2,TYRO3,OBSCN,DPP10,CDK16,GCNT4,ERBB4,SPCS3,AKT2,MYLK3,DUSP1,CDK19,RNF144A,PPM1K,ASH1L,RASSF2,PPP3R1,TTLL7,OTUD3,ZNRF1,PTPRD,DUSP18,ABHD17A,JOSD1,PRSS23,LRRK2,C1RA,MAPK10,PPP1R9B,FN3K,ADAM9,UBE3B,BRSK2,HUNK,HR,PRKCZ,MERTK,PTPRT,PTK2,CSNK1…
GO:MF	cell adhesion molecule binding	GO:0050839	3.58e-09	8.44594	290	1395	48	25412	GRIN2A,OBSCN,NRXN1,PTN,PTPRD,NPTN,ADAM9,SIRPA,PTPRT,NRCAM,PTK2,FERMT2,CTNNA2,LRRC4C,PTPRB,PTPRZ1,CXCL12,SRC,PKP1,CDK5R1,ITGAL,CDH12,AKAP5,LAMA3,ITGAV,ACTN1,CDH22,PTPRJ,NUMB,PTK7,CDH11,UTRN,CDHR2,EGFR,PTPRF,ARVCF,ITGB8,ANK3,JAM2,KIRREL2,NFASC,ESAM,DSCAM,VWF,TBC1D2,SYK,MYH9,ADAM8
GO:MF	structural constituent of postsynapse	GO:0099186	6.15e-09	8.21145	22	1395	13	25412	GIT1,DLG4,DLGAP1,SHANK1,SHANK3,HOMER1,MAGI2,NEFH,MPP2,DLG1,ACTN1,SHANK2,INA
GO:MF	metal ion binding	GO:0046872	6.83e-09	8.16552	4091	1395	318	25412	EFHD2,SCRT1,ENDOU,RPH3A,ADCY9,PLCB1,CAMKK2,DGKZ,GIT1,ZFPM1,ASAP1,SMAD3,TNNC1,ZNFX1,ZFP703,SYT2,GRIN2A,NLK,PDP1,PRKCB,CALM1,PLCB4,HEG1,PHOSPHO1,TTLL11,MYL4,ATP2B2,LASP1,SCUBE1,PITPNM2,ADCY1,ITPR1,ATP1A1,ZMYND8,MAST3,TRIM37,CRIP2,PPP3CA,MAN1C1,BSN,NUDT3,DNAJC21,ATP2B1,RIMS1,AIFM3,ACAP3,SLC25A23,GALNT18,AGMAT,ASTN2,ZMIZ2,RORA,CAR10,MAN2A1,OBSCN,NRXN1,FSTL4,SLC6A1,ALOX12B,KCNIP3,AKT2,MYO5A,ZBTB18,MAN…
GO:MF	transcription factor binding	GO:0008134	1.23e-08	7.91018	612	1395	76	25412	ZFPM1,SMAD3,ZFP703,NLK,PRKCB,WFS1,BSN,RORA,CRY2,HEY1,CXXC5,VGLL4,ZBTB16,BHLHE40,ACTN4,LMO4,HR,APBB1,PTPRT,HDAC4,BAIAP2,FOXO3,PGR,NR1D1,CIT,HIRA,TACC1,ESRRB,EGR2,TLE1,PCLO,PPARD,ARRB1,SRC,PPARG,RBPJ,TRIB1,CRTC1,MEF2D,ZBTB17,ZBTB7A,EPAS1,MAPK14,CEBPA,SCX,FOXP1,LMO2,GAS2L1,MYOD1,SRF,NCOR2,PER1,ASCL1,DDIT3,PURB,VHL,CHD4,MAP3K10,SNW1,PPARGC1A,PPARA,ATF4,BCOR,MEF2C,WIPI1,MED1,DACT2,ZBTB8A,ARID5A,YAP1,N…
GO:MF	cation binding	GO:0043169	1.25e-08	7.90279	4191	1395	323	25412	EFHD2,SCRT1,ENDOU,RPH3A,ADCY9,PLCB1,CAMKK2,DGKZ,GIT1,ZFPM1,ASAP1,SMAD3,TNNC1,ZNFX1,ZFP703,SYT2,GRIN2A,NLK,PDP1,PRKCB,CALM1,PLCB4,HEG1,PHOSPHO1,TTLL11,MYL4,ATP2B2,LASP1,SCUBE1,PITPNM2,ADCY1,ITPR1,ATP1A1,ZMYND8,MAST3,TRIM37,CRIP2,PPP3CA,MAN1C1,BSN,NUDT3,DNAJC21,ATP2B1,RIMS1,AIFM3,ACAP3,SLC25A23,GALNT18,AGMAT,ASTN2,ZMIZ2,RORA,CAR10,MAN2A1,OBSCN,NRXN1,FSTL4,SLC6A1,ALOX12B,KCNIP3,AKT2,MYO5A,ZBTB18,MAN…
GO:MF	potassium channel activity	GO:0005267	2.1e-08	7.67742	119	1395	28	25412	SNAP25,KCNC1,KCNA2,KCNA1,KCNIP3,KCNJ6,KCNH1,KCNQ3,KCNJ9,GRIK5,KCNJ12,KCNJ10,HCN1,KCNK12,KCNJ11,TMEM38A,KCNK2,KCNN2,KCNS2,KCNK1,KCNK9,LRRC38,KCNAB1,KCNK3,KCNN1,HCN2,ABCC8,GRIK3
GO:MF	GTPase activator activity	GO:0005096	3.86e-08	7.41295	239	1395	41	25412	PLCB1,STARD8,SIPA1L1,GIT1,ASAP1,RGS20,RAP1GAP2,ACAP3,ARHGAP10,RGS7,TBC1D30,ARAP2,DAB2IP,RAPGEF4,ADAP1,TBC1D22A,PREX2,ARHGEF10L,LRRK2,ACAP2,DOCK4,RASAL2,GARNL3,SYNGAP1,TBC1D24,AGAP2,ARRB1,ASAP2,STXBP5L,RANBP2,RAP1GDS1,SH3BP1,GIPC1,ARHGAP42,ARHGAP35,SIPA1L2,ARHGAP33,ARHGEF19,ARHGAP25,TBC1D2,ARHGAP31
GO:MF	calcium channel activity	GO:0005262	3.97e-08	7.40126	114	1395	27	25412	GRIN2A,SLC24A2,CACNA1I,TRPC6,ITPR1,CACNB3,CACNA2D3,RYR1,GRIN1,CACNG2,CACNB4,CNR1,STIM2,CACNA1A,TRPM4,ITGAV,SLC24A3,RYR2,TMEM37,CACNA2D1,HTR1B,CACNB1,GRIN2C,CACNA2D4,ORAI3,ITPR2,CACNA1E
GO:MF	DNA-binding transcription factor binding	GO:0140297	4.26e-08	7.37052	498	1395	65	25412	ZFPM1,SMAD3,ZFP703,NLK,PRKCB,WFS1,CRY2,HEY1,CXXC5,BHLHE40,ACTN4,LMO4,HR,APBB1,PTPRT,HDAC4,HIRA,TACC1,ESRRB,EGR2,TLE1,PPARD,ARRB1,SRC,PPARG,RBPJ,TRIB1,CRTC1,MEF2D,ZBTB17,ZBTB7A,EPAS1,MAPK14,CEBPA,SCX,FOXP1,LMO2,GAS2L1,MYOD1,SRF,NCOR2,PER1,ASCL1,DDIT3,PURB,VHL,CHD4,MAP3K10,SNW1,PPARGC1A,PPARA,ATF4,BCOR,MEF2C,WIPI1,MED1,ZBTB8A,ARID5A,YAP1,NRIP1,HIPK2,SOX9,NFIA,SMARCA4,FHL2
GO:MF	identical protein binding	GO:0042802	6.28e-08	7.20173	2299	1395	197	25412	MAPK4,MGLL,ADRA1D,NRN1,PLCB1,FBXW7,GIT1,WHRN,SMAD3,KCTD1,KCTD17,TNNC1,ATF6,SORBS2,NBL1,CD6,SLC13A5,TRPC6,JDP2,SCUBE1,PACSIN1,ITPR1,MYBPC3,TRIM37,BOK,RASSF3,APLN,SYNDIG1,MAN2A1,PPP1R9A,SLC6A1,GRIA4,MAF,ERBB4,SYNE1,DAB2IP,MYO5A,SHANK1,PACSIN3,KLHL2,TFRC,TBC1D22A,UBQLN4,KCNH1,CCDC88C,HSD11B1,ADARB1,SYT1,RASGRP1,E030003E18RIK,KCTD15,CNKSR2,SHANK3,HOMER1,EXT1,ZBTB16,BHLHE40,TESC,GLS,ACTN4,LRRK2,C1RA,T…
GO:MF	transferase activity	GO:0016740	2.07e-07	6.68447	2287	1395	194	25412	MAPK4,FBXW7,CAMKK2,DGKZ,MAPK6,NLK,ETNK2,PRKCB,HKDC1,PAK1,CHST2,HERC6,DPY19L1,CAMK4,MAST3,TRIM37,ST3GAL5,ZDHHC8,GUCY2G,GALNT18,LMTK2,TYRO3,PIP5K1C,OBSCN,CDK16,GCNT4,ERBB4,FUT9,LPCAT4,PIP5K1B,AKT2,MYLK3,LPGAT1,CDK19,MPP3,RNF144A,ASH1L,RASSF2,CDS1,HS6ST3,ZNRF1,EXT1,LRRK2,LCAT,METTL7A1,MAPK10,PPP1R9B,FN3K,HHATL,PI4KA,AGPAT3,UBE3B,BRSK2,HUNK,PRKCZ,PIGZ,PIP4K2C,MERTK,PTK2,GLT8D2,CSNK1G2,HECW1,FGFRL1,HD…
GO:MF	catalytic activity	GO:0003824	3.04e-07	6.51746	5730	1395	410	25412	MAPK4,MGLL,ENDOU,TTL,ADCY9,PLCB1,FBXW7,CAMKK2,DGKZ,PPME1,PTPN3,MAPK6,ZNFX1,DIO2,NLK,ETNK2,PDP1,TUBA4A,PRKCB,HKDC1,PLCB4,PHOSPHO1,RASD1,DUSP7,TTLL11,ATP2B2,BAP1,PAK1,CHST2,HERC6,DPY19L1,CAMK4,ADCY1,ATP1A1,PLCXD2,MAST3,TRIM37,PPP3CA,MAN1C1,NUDT3,SENP2,ST3GAL5,ATP2B1,ZDHHC8,KIF5C,AIFM3,DUSP14,GUCY2G,DPP8,GALNT18,LMTK2,AGMAT,TYRO3,PIP5K1C,CAR10,ABHD6,MAN2A1,OBSCN,DPP10,RAB6B,CDK16,ALOX12B,GCNT4,ERBB4…
GO:MF	structural constituent of postsynaptic specialization	GO:0098879	4.22e-07	6.37461	12	1395	9	25412	GIT1,DLG4,DLGAP1,SHANK1,SHANK3,MAGI2,MPP2,DLG1,SHANK2
GO:MF	glutamate receptor binding	GO:0035254	5.51e-07	6.25855	65	1395	19	25412	GRIN2A,CALM1,ATP2B2,DLG4,SYNDIG1,NETO2,SHANK1,MAP1A,SHANK3,HOMER1,GRIN1,CACNG2,HOMER2,PTPN4,CDK5R1,AKAP5,DLG1,IGSF11,SHANK2
GO:MF	lipid binding	GO:0008289	1.11e-06	5.95513	828	1395	88	25412	RPH3A,PLCB1,STARD8,ASAP1,CPNE9,SYT2,CD6,STARD10,PACSIN1,PITPNM2,ITPR1,ATP1A1,S1PR1,RTN4R,RORA,OBSCN,ARAP2,CDK5R2,DAB2IP,IQSEC1,INPPL1,PACSIN3,ADAP1,SPTBN2,OSBP2,NR3C1,PAQR8,HSD11B1,SYT1,RASGRP1,SPTB,SYT12,ACAP2,FERMT2,TTPAL,MYO1E,ESRRG,PLEKHA4,OSBPL3,PGR,DAB1,ESRRB,OSBPL1A,SMPD3,STARD3,PCLO,HCN1,PPARD,STARD4,PSD3,NFE2L1,TOM1L2,CYP4F14,SYT13,GRAMD1B,ZFYVE28,UNC13A,ESRRA,PREX1,MELK,CYP11A1,RBP4,ATP…
GO:MF	structural constituent of postsynaptic density	GO:0098919	1.66e-06	5.77862	10	1395	8	25412	DLG4,DLGAP1,SHANK1,SHANK3,MAGI2,MPP2,DLG1,SHANK2
GO:MF	ligand-gated ion channel activity	GO:0015276	1.85e-06	5.73343	134	1395	27	25412	GABRD,GRIN2A,ITPR1,GABRA1,GRIA4,GABRB2,KCNJ6,GLRB,RYR1,GRIN1,KCNJ9,GABRG2,GRIK5,KCNJ12,KCNJ10,HCN1,KCNJ11,TRPM4,KCNN2,KCNK1,RYR2,SCNN1A,GRIN2C,ASIC1,ITPR2,HCN2,GRIK3
GO:MF	ligand-gated channel activity	GO:0022834	2.59e-06	5.58651	136	1395	27	25412	GABRD,GRIN2A,ITPR1,GABRA1,GRIA4,GABRB2,KCNJ6,GLRB,RYR1,GRIN1,KCNJ9,GABRG2,GRIK5,KCNJ12,KCNJ10,HCN1,KCNJ11,TRPM4,KCNN2,KCNK1,RYR2,SCNN1A,GRIN2C,ASIC1,ITPR2,HCN2,GRIK3
GO:MF	voltage-gated potassium channel activity	GO:0005249	3.43e-06	5.4647	87	1395	21	25412	SNAP25,KCNC1,KCNA2,KCNA1,KCNJ6,KCNH1,KCNQ3,KCNJ9,KCNJ12,KCNJ10,HCN1,KCNJ11,KCNK2,KCNN2,KCNS2,KCNK1,KCNK9,LRRC38,KCNAB1,KCNK3,HCN2
GO:MF	protein dimerization activity	GO:0046983	7.54e-06	5.12274	1134	1395	108	25412	MAPK4,MGLL,ANO3,SMAD3,MAPK6,TNNC1,ATF6,TRPC6,JDP2,ATP1A1,TRIM37,PPP3CA,BOK,ADORA1,SYNDIG1,MAN2A1,RILPL1,ERBB4,SYNE1,DAB2IP,KLHL2,TFRC,HEY1,TBC1D22A,HSD11B1,SYT1,ADRA1B,EXT1,ZBTB16,BHLHE40,TESC,ACTN4,LRRK2,THRSP,RAB11FIP4,ACSL6,HES3,PTPRT,ABCB9,ADRA2C,SGTB,H2-T23,SLC4A11,IL12A,ATP1B2,BTBD11,ZFP365,TPM1,TCOF1,MTUS2,ADRB1,STARD3,ATP2A1,NFE2L1,NTRK2,MEF2D,ST3GAL2,LRP4,ZDHHC2,MTCL1,EPAS1,PTGS2,SCLY,CE…
GO:MF	syntaxin-1 binding	GO:0017075	8.52e-06	5.06939	24	1395	11	25412	SNAP25,CPLX2,MYO5A,PRRT2,SYT1,SNPH,LRRK2,STXBP1,CPLX1,UNC13A,UNC13B
GO:MF	ligand-gated cation channel activity	GO:0099094	1.15e-05	4.93977	101	1395	22	25412	GRIN2A,ITPR1,GRIA4,KCNJ6,RYR1,GRIN1,KCNJ9,GRIK5,KCNJ12,KCNJ10,HCN1,KCNJ11,TRPM4,KCNN2,KCNK1,RYR2,SCNN1A,GRIN2C,ASIC1,ITPR2,HCN2,GRIK3
GO:MF	transcription regulator activity	GO:0140110	1.43e-05	4.84374	1811	1395	154	25412	SCRT1,NFIC,ZFPM1,SMAD3,CUX1,KCTD1,ATF6,PRKCB,WNT4,JDP2,CAMTA2,CUX2,ZMYND8,TRIM37,ZMIZ2,RORA,PKNOX2,MAF,SMARCD1,KCNIP3,ZBTB18,NR3C1,SSBP3,HEY1,HSPA1B,FOXK1,POU6F1,HIVEP2,ATXN7L3,ZBTB16,BHLHE40,ACTN4,ZMIZ1,ATMIN,FOXK2,TLE6,KLF16,WWC1,PLAGL1,HES3,HR,SCRT2,HDAC4,POU2F2,ESRRG,SCAI,ETV6,FOXO3,PGR,NR1D1,TACC1,ESRRB,EGR2,TLE1,ZFP148,PPARD,ARRB1,PPARG,TBR1,CITED4,HIPK3,RBPJ,NFE2L1,ZFP651,CSRNP1,HCFC2,NR2F…
GO:MF	nuclear steroid receptor activity	GO:0003707	1.8e-05	4.74587	16	1395	9	25412	OLFR78,NR3C1,PAQR8,ESRRG,PGR,ESRRB,ABHD2,ESRRA,PPARA
GO:MF	transcription coregulator activity	GO:0003712	1.93e-05	4.7137	468	1395	56	25412	ZFPM1,KCTD1,PRKCB,WNT4,CAMTA2,ZMYND8,TRIM37,ZMIZ2,SMARCD1,SSBP3,HSPA1B,ATXN7L3,ACTN4,ZMIZ1,TLE6,WWC1,HR,HDAC4,SCAI,TACC1,TLE1,ARRB1,CITED4,HIPK3,HCFC2,KDM7A,TBL1XR1,LMO2,SMARCA2,ACTN1,MYT1L,NCOR2,TLE3,MAP3K10,PDLIM1,SNW1,PPARGC1A,DPF1,BCOR,HELZ2,MED1,CBFA2T2,WWTR1,TRIM8,MED13L,ARID5A,FBXL19,YAP1,NRIP1,HIPK2,MED14,RALY,SMARCA4,FHL2,YAF2,NOTCH1
GO:MF	enzyme activator activity	GO:0008047	2.28e-05	4.6417	507	1395	59	25412	PLCB1,STARD8,FBXW7,SIPA1L1,GIT1,ASAP1,RGS20,CALM1,RAP1GAP2,ACAP3,ARHGAP10,RGS7,TBC1D30,ARAP2,CDK5R2,DAB2IP,RAPGEF4,ADAP1,INCENP,TBC1D22A,PREX2,ARHGEF10L,LRRK2,ACAP2,DOCK4,RASAL2,GARNL3,HBEGF,MAPK9,SYNGAP1,TBC1D24,AGAP2,PPARD,ARRB1,SRC,ASAP2,STXBP5L,CDK5R1,RANBP2,PRKCE,RAP1GDS1,PRSS22,SH3BP1,GIPC1,ARHGAP42,PIM1,ARHGAP35,SIPA1L2,PDPK1,ARHGAP33,SPRY2,SEC14L2,ARHGEF19,ARHGAP25,FAM20A,BMP2,RGCC,TBC1D2…
GO:MF	channel regulator activity	GO:0016247	2.53e-05	4.59638	132	1395	25	25412	LYNX1,ARPP19,PTPN3,GRM2,PRKCB,CALM1,ITPR1,CACNB3,NRXN1,KCNIP3,PACSIN3,SCN1B,PRKCZ,CACNG2,NRXN3,STIM2,KCNK2,DLG1,DDI2,PCSK9,LRRC38,ANK2,KCNAB1,VTI1B,AMIGO1
GO:MF	steroid binding	GO:0005496	2.57e-05	4.58931	123	1395	24	25412	ATP1A1,RORA,OSBP2,NR3C1,PAQR8,HSD11B1,ESRRG,OSBPL3,PGR,ESRRB,OSBPL1A,STARD3,STARD4,NFE2L1,GRAMD1B,ESRRA,CYP11A1,ATP1A2,CALB1,OSBPL6,OSBPL8,PAQR9,SIDT1,INSIG1
GO:MF	PDZ domain binding	GO:0030165	3.01e-05	4.52097	115	1395	23	25412	LZTS3,NOS1AP,ATP2B2,DLG4,DLGAP3,ATP2B1,MPP3,CCDC88C,ERC2,DOCK4,FZD3,KCNJ9,GRIK5,KCNJ12,BAIAP2,CIT,ADRB1,GIPC1,MPP2,DLG1,NKD1,GRIN2C,HCN2
GO:MF	ion channel regulator activity	GO:0099106	3.03e-05	4.51884	124	1395	24	25412	LYNX1,ARPP19,PTPN3,GRM2,PRKCB,CALM1,ITPR1,CACNB3,NRXN1,KCNIP3,PACSIN3,SCN1B,PRKCZ,NRXN3,STIM2,KCNK2,DLG1,DDI2,PCSK9,LRRC38,ANK2,KCNAB1,VTI1B,AMIGO1
GO:MF	voltage-gated calcium channel activity	GO:0005245	3.58e-05	4.44651	45	1395	14	25412	CACNA1I,CACNB3,CACNA2D3,RYR1,CACNG2,CACNB4,CNR1,CACNA1A,ITGAV,CACNA2D1,HTR1B,CACNB1,CACNA2D4,CACNA1E
GO:MF	sodium ion transmembrane transporter activity	GO:0015081	6.27e-05	4.20265	138	1395	25	25412	SLC13A5,SLC24A2,CACNA1I,ATP1A1,SCN8A,SLC6A1,SLC1A3,SCN1B,SLC1A2,SLC4A11,ATP1B2,GRIK5,SLC9A5,HCN1,SLC4A4,SLC24A3,SLC28A1,ATP1A2,KCNK1,SLC8A2,SCNN1A,SLC4A8,ASIC1,HCN2,GRIK3
GO:MF	growth factor binding	GO:0019838	7.25e-05	4.13951	139	1395	25	25412	CHRDL1,IGFBP4,IL11RA1,LIFR,LRRC32,FSTL4,SORT1,ERBB4,PTN,VASN,DUSP1,FGFRL1,FGFR3,HTRA1,PTPRZ1,IGFBP6,NTRK2,ACVR1C,EPHA8,ITGAV,ENG,ACVRL1,NTRK3,IGF1R,EGFR
GO:MF	phosphatase binding	GO:0019902	0.00014348	3.84321	226	1395	33	25412	ARPP19,PPME1,SMAD3,DLG4,ITPR1,PHACTR1,PPP1R9A,DAB2IP,CRY2,PPP3R1,CADM4,PPP1R9B,SIRPA,PTPRT,PTK2,GRIN1,ANK1,STRN4,PHACTR3,PPARG,MAPK14,MAGI2,AKAP5,DLG1,SPRED1,PPARA,PIK3R2,SMG7,PPP6R1,EGFR,AKAP6,MAST2,SYK
GO:MF	transcription coregulator binding	GO:0001221	0.000199028	3.70109	127	1395	23	25412	SMAD3,BSN,RORA,VGLL4,ZBTB16,BAIAP2,FOXO3,PGR,NR1D1,CIT,PCLO,PPARD,ZBTB17,ZBTB7A,EPAS1,FOXP1,LMO2,PER1,CHD4,PPARA,MED1,ZBTB8A,SMARCA4
GO:MF	guanyl-nucleotide exchange factor activity	GO:0005085	0.000261752	3.58211	221	1395	32	25412	ARHGEF17,DOCK3,IQSEC2,ARHGEF9,OBSCN,RASGEF1B,RAPGEFL1,IQSEC1,RAPGEF4,FARP1,CCDC88C,FGD6,RASGRP1,PREX2,ARHGEF10L,NET1,RASGEF1A,DOCK4,ADRB1,PSD3,EPS8L2,RASGEF1C,MADD,PREX1,FNIP1,CHRM4,ARHGEF2,ARHGEF25,ARHGEF3,RCC2,ARHGEF19,VAV3
GO:MF	RNA polymerase II-specific DNA-binding transcription factor binding	GO:0061629	0.000303652	3.51762	372	1395	45	25412	ZFPM1,SMAD3,PRKCB,CRY2,HEY1,BHLHE40,ACTN4,HR,PTPRT,HDAC4,HIRA,TACC1,ESRRB,EGR2,PPARD,ARRB1,SRC,PPARG,RBPJ,TRIB1,MEF2D,ZBTB7A,EPAS1,MAPK14,CEBPA,FOXP1,LMO2,GAS2L1,MYOD1,SRF,NCOR2,DDIT3,CHD4,SNW1,PPARGC1A,PPARA,ATF4,MEF2C,WIPI1,MED1,ZBTB8A,ARID5A,NRIP1,HIPK2,SMARCA4
GO:MF	DNA-binding transcription repressor activity	GO:0001217	0.000409929	3.38729	340	1395	42	25412	SCRT1,SMAD3,JDP2,CUX2,KCNIP3,ZBTB18,HEY1,FOXK1,POU6F1,ZBTB16,BHLHE40,FOXK2,KLF16,HES3,ETV6,FOXO3,NR1D1,ZFP148,PPARD,NFE2L1,NR2F6,ZBTB34,ZBTB7A,ESRRA,FOXP1,ERF,ZBTB1,MYT1L,MXD1,NACC2,ASCL1,PURB,SREBF2,SOX6,ZFP459,PPARA,MXD3,ZBTB8A,SNAI3,NR1D2,BATF3,ZFP180
GO:MF	phosphoric ester hydrolase activity	GO:0042578	0.000558275	3.25315	356	1395	43	25412	PLCB1,PTPN3,PDP1,PLCB4,PHOSPHO1,DUSP7,ATP1A1,PLCXD2,PPP3CA,DUSP14,INPPL1,DUSP1,PPM1K,PPP3R1,PTPRD,DUSP18,PLCH2,LRRK2,PTPRT,PTPRB,PTPRZ1,PDE5A,PTPN4,SMPD3,PDE8B,INPP4A,NT5DC3,PPM1L,DUSP3,PLCD3,DUSP6,PTPRJ,PFKFB3,INPP5D,TNS3,MTMR12,GDPD5,PTP4A1,PTPRS,PTPRF,PPM1H,DUSP22,CDC25B
GO:MF	alcohol binding	GO:0043178	0.000572228	3.24243	88	1395	18	25412	RPH3A,TRPC6,ITPR1,ASTN2,OSBP2,OSBPL3,OSBPL1A,STARD3,STARD4,PRKCE,NFE2L1,GRAMD1B,CYP11A1,RBP4,OSBPL6,OSBPL8,ITPR2,SIDT1
GO:MF	small GTPase binding	GO:0031267	0.000629814	3.20079	275	1395	36	25412	RPH3A,GIT1,RIMS3,PAK1,CYFIP2,RIMS1,INF2,EXPH5,TBC1D30,MYO5A,RAPGEF4,MYRIP,FARP1,RIMS4,LRRK2,RAB11FIP4,ACAP2,DOCK4,SYTL1,RANBP2,RNF152,FMNL1,HACE1,CDKL5,WASF1,MICAL3,SORL1,ARHGEF2,ROCK2,DGKI,DVL3,PPP6R1,RCC2,BRK1,RAB11FIP3,STK19
GO:MF	MAP kinase activity	GO:0004707	0.000635608	3.19681	17	1395	8	25412	MAPK4,MAPK6,NLK,MAPK10,MAPK9,MAPK12,MAPK14,MAPK11
GO:MF	DNA-binding transcription repressor activity, RNA polymerase II-specific	GO:0001227	0.000882709	3.05418	338	1395	41	25412	SCRT1,JDP2,CUX2,KCNIP3,ZBTB18,HEY1,FOXK1,POU6F1,ZBTB16,BHLHE40,FOXK2,KLF16,HES3,ETV6,FOXO3,NR1D1,ZFP148,PPARD,NFE2L1,NR2F6,ZBTB34,ZBTB7A,ESRRA,FOXP1,ERF,ZBTB1,MYT1L,MXD1,NACC2,ASCL1,PURB,SREBF2,SOX6,ZFP459,PPARA,MXD3,ZBTB8A,SNAI3,NR1D2,BATF3,ZFP180
GO:MF	scaffold protein binding	GO:0097110	0.000927166	3.03284	82	1395	17	25412	GRM2,GRIN2A,DLG4,DLGAP3,SHANK1,SHANK3,HOMER1,BAIAP2,CIT,TCOF1,SRC,LRP4,AKAP5,RYR2,ITPR2,UBTF,SYK
GO:MF	cadherin binding	GO:0045296	0.00110113	2.95816	66	1395	15	25412	OBSCN,PTPRT,CTNNA2,PTPRB,PKP1,CDK5R1,CDH12,AKAP5,CDH22,PTPRJ,NUMB,CDH11,ARVCF,ANK3,TBC1D2
GO:MF	transcription corepressor activity	GO:0003714	0.00110918	2.955	181	1395	27	25412	ZFPM1,KCTD1,WNT4,ZMYND8,HSPA1B,TLE6,HR,HDAC4,SCAI,TLE1,HIPK3,TBL1XR1,NCOR2,TLE3,MAP3K10,SNW1,BCOR,MED1,CBFA2T2,WWTR1,ARID5A,YAP1,NRIP1,HIPK2,SMARCA4,FHL2,YAF2
GO:MF	protein homodimerization activity	GO:0042803	0.00120625	2.91856	759	1395	73	25412	MAPK4,MGLL,SMAD3,TNNC1,TRPC6,JDP2,TRIM37,BOK,SYNDIG1,MAN2A1,ERBB4,SYNE1,DAB2IP,KLHL2,TFRC,TBC1D22A,HSD11B1,EXT1,ZBTB16,BHLHE40,TESC,ACTN4,LRRK2,THRSP,RAB11FIP4,ACSL6,PTPRT,ABCB9,ADRA2C,SGTB,H2-T23,ZFP365,TPM1,MTUS2,STARD3,ATP2A1,NTRK2,MEF2D,ST3GAL2,LRP4,ZDHHC2,MTCL1,PTGS2,SCLY,CEBPA,ZBTB7B,KCNN2,ACTN1,MYOD1,ENG,FZD9,ZBTB1,SRF,NACC2,DDIT3,SOX6,FMR1,GLDC,SLC4A1,S100A6,UXS1,S100B,WWTR1,TRIM8,RAB11FI…
GO:MF	protein tyrosine phosphatase activity	GO:0004725	0.00155842	2.80732	94	1395	18	25412	PTPN3,DUSP7,DUSP14,DUSP1,PTPRD,DUSP18,PTPRT,PTPRB,PTPRZ1,PTPN4,DUSP3,DUSP6,PTPRJ,PTP4A1,PTPRS,PTPRF,DUSP22,CDC25B
GO:MF	phosphoprotein phosphatase activity	GO:0004721	0.00156495	2.8055	163	1395	25	25412	PTPN3,PDP1,DUSP7,PPP3CA,DUSP14,DUSP1,PPM1K,PPP3R1,PTPRD,DUSP18,LRRK2,PTPRT,PTPRB,PTPRZ1,PTPN4,PPM1L,DUSP3,DUSP6,PTPRJ,PTP4A1,PTPRS,PTPRF,PPM1H,DUSP22,CDC25B
GO:MF	SH3 domain binding	GO:0017124	0.00219662	2.65824	125	1395	21	25412	AFAP1L1,FMN1,DAB2IP,INPPL1,CNTNAP1,SHANK1,PRRT2,SHANK3,ADAM9,SIRPA,DOCK4,GRIK5,SYNGAP1,PRKCE,SH3BP1,AKAP5,INPP5D,SHANK2,QK,DRD4,ARHGAP31
GO:MF	phosphatase activity	GO:0016791	0.00228189	2.6417	267	1395	34	25412	PTPN3,PDP1,PHOSPHO1,DUSP7,ATP1A1,PPP3CA,DUSP14,INPPL1,DUSP1,PPM1K,PPP3R1,PTPRD,DUSP18,LRRK2,PTPRT,PTPRB,PTPRZ1,PTPN4,INPP4A,NT5DC3,PPM1L,DUSP3,DUSP6,PTPRJ,PFKFB3,INPP5D,TNS3,MTMR12,PTP4A1,PTPRS,PTPRF,PPM1H,DUSP22,CDC25B
GO:MF	phospholipid binding	GO:0005543	0.00238494	2.62252	465	1395	50	25412	RPH3A,PLCB1,ASAP1,CPNE9,SYT2,PACSIN1,PITPNM2,ITPR1,OBSCN,ARAP2,DAB2IP,INPPL1,PACSIN3,ADAP1,SPTBN2,SYT1,RASGRP1,SPTB,SYT12,ACAP2,FERMT2,TTPAL,MYO1E,PLEKHA4,DAB1,SMPD3,PCLO,HCN1,PSD3,TOM1L2,SYT13,GRAMD1B,ZFYVE28,UNC13A,PREX1,UNC13B,ARHGAP35,AXL,TRIM72,OSBPL8,MYO1B,ARHGAP33,PHLDA1,WIPI1,TWF2,ANXA11,ESYT1,ITPR2,ATP8B1,PLEKHA8
GO:MF	molecular adaptor activity	GO:0060090	0.00271865	2.56565	416	1395	46	25412	FBXW7,SNAP25,DLGAP3,DLGAP1,AP1S1,SMARCD1,SYNE1,DAB2IP,STX1B,SHANK1,MAP1A,SHANK3,HOMER1,LRRK2,WWC1,SUN1,SGTB,ATP1B2,ANK1,BAIAP2,HOMER2,TCOF1,NAPA,ARRB1,RB1CC1,MAGI2,NEFH,AKAP5,DLG1,GAS2L1,SUN2,MAPK8IP1,VHL,SHANK2,DLGAP4,DVL3,ANK2,SLA2,AKAP6,FSCN1,ANK3,HCN2,AP1S3,HERPUD1,ANKRD9,MYH9
GO:MF	GTPase binding	GO:0051020	0.0037373	2.42744	309	1395	37	25412	RPH3A,GIT1,RIMS3,PAK1,CYFIP2,RIMS1,INF2,EXPH5,TBC1D30,PPP1R9A,MYO5A,RAPGEF4,MYRIP,FARP1,RIMS4,LRRK2,RAB11FIP4,ACAP2,DOCK4,SYTL1,RANBP2,RNF152,FMNL1,HACE1,CDKL5,WASF1,MICAL3,SORL1,ARHGEF2,ROCK2,DGKI,DVL3,PPP6R1,RCC2,BRK1,RAB11FIP3,STK19
GO:MF	sterol binding	GO:0032934	0.00405478	2.39203	56	1395	13	25412	RORA,OSBP2,OSBPL3,OSBPL1A,STARD3,STARD4,NFE2L1,GRAMD1B,CYP11A1,OSBPL6,OSBPL8,SIDT1,INSIG1
GO:MF	sodium channel activity	GO:0005272	0.0045458	2.34239	41	1395	11	25412	CACNA1I,SCN8A,SCN1B,SLC4A11,GRIK5,HCN1,KCNK1,SCNN1A,ASIC1,HCN2,GRIK3
GO:MF	synaptic receptor adaptor activity	GO:0030160	0.00456782	2.34029	4	1395	4	25412	SHANK1,SHANK3,HOMER2,SHANK2
GO:MF	anion transmembrane transporter activity	GO:0008509	0.00538515	2.2688	314	1395	37	25412	GABRD,ANO3,SLC13A5,SLC24A2,LRRC8B,SFXN5,GABRA1,SLC25A23,SLC6A1,GABRB2,TTYH1,SLC1A3,SLC23A3,GLRB,SLC25A18,SLC1A2,SLC12A5,SLC4A11,GABRG2,SLCO2A1,SLC9A5,TTYH3,MFSD12,SLC36A1,CLCN2,SLC4A4,SLC25A22,SLC24A3,SLC39A14,SLC4A8,SLC4A1,LRRC8C,AQP6,SLC38A3,SLC25A42,GPR89,SLCO1C1
GO:MF	postsynaptic neurotransmitter receptor activity	GO:0098960	0.0056184	2.25039	66	1395	14	25412	GABRD,GRIN2A,GABRA1,GRIA4,GABRB2,GLRB,GRIN1,GABRG2,GRIK5,ADRB1,CHRM4,GRIN2C,DRD4,GRIK3
GO:MF	ionotropic glutamate receptor binding	GO:0035255	0.00631199	2.19983	35	1395	10	25412	DLG4,NETO2,SHANK1,MAP1A,SHANK3,CACNG2,CDK5R1,DLG1,IGSF11,SHANK2
GO:MF	syntaxin binding	GO:0019905	0.00695343	2.1578	76	1395	15	25412	SNAP25,CPLX2,MYO5A,PRRT2,SYT1,SNPH,LRRK2,SYT12,STXBP1,NAPA,STXBP5L,CPLX1,UNC13A,CACNA1A,UNC13B
GO:MF	ankyrin binding	GO:0030506	0.00953259	2.02079	23	1395	8	25412	ATP1A1,OBSCN,SPTB,KCTD6,NRCAM,PLEC,KCNJ11,SLC4A1
GO:MF	neurotransmitter receptor activity involved in regulation of postsynaptic membrane potential	GO:0099529	0.00960808	2.01736	52	1395	12	25412	GABRD,GRIN2A,GABRA1,GRIA4,GABRB2,GLRB,GRIN1,GABRG2,GRIK5,ADRB1,GRIN2C,GRIK3
GO:MF	transcription coactivator activity	GO:0003713	0.0117759	1.92901	252	1395	31	25412	PRKCB,CAMTA2,TRIM37,ZMIZ2,SSBP3,ATXN7L3,ACTN4,ZMIZ1,WWC1,TACC1,ARRB1,CITED4,HCFC2,LMO2,SMARCA2,ACTN1,MYT1L,PDLIM1,SNW1,PPARGC1A,HELZ2,MED1,WWTR1,TRIM8,YAP1,NRIP1,HIPK2,MED14,SMARCA4,YAF2,NOTCH1
GO:MF	G protein-coupled receptor binding	GO:0001664	0.011938	1.92307	313	1395	36	25412	CALM1,WNT4,WNT9A,DLG4,S1PR1,APLN,ADORA1,SHANK1,HSPA1B,CCDC88C,HOMER1,PPP1R9B,CXCL14,ARR3,ADRA2C,HOMER2,ADRB1,CXCL12,TUB,ARRB1,PPP1R1B,TSNAX,MAGI2,KISS1,WNT10A,AKAP5,CORT,CCL27A,DVL3,CTHRC1,EDNRB,WNT7B,NES,ADM,CRH,PTCH2
GO:MF	protein-macromolecule adaptor activity	GO:0030674	0.011938	1.92307	313	1395	36	25412	FBXW7,SNAP25,AP1S1,SYNE1,DAB2IP,STX1B,SHANK1,MAP1A,SHANK3,LRRK2,WWC1,SUN1,ATP1B2,ANK1,BAIAP2,HOMER2,TCOF1,NAPA,ARRB1,MAGI2,NEFH,GAS2L1,SUN2,MAPK8IP1,VHL,SHANK2,DVL3,ANK2,SLA2,AKAP6,FSCN1,ANK3,AP1S3,HERPUD1,ANKRD9,MYH9
GO:MF	SNARE binding	GO:0000149	0.015003	1.82382	110	1395	18	25412	SNAP25,CPLX2,STX1B,MYO5A,PRRT2,SYT1,SNPH,LRRK2,SYT12,STXBP1,NAPA,STXBP5L,CPLX1,SYT13,UNC13A,CACNA1A,UNC13B,VTI1B
GO:MF	transmembrane receptor protein kinase activity	GO:0019199	0.0154056	1.81232	81	1395	15	25412	TYRO3,ERBB4,MERTK,FGFRL1,FGFR3,NTRK2,ACVR1C,EPHA8,ENG,ACVRL1,NTRK3,AXL,IGF1R,EGFR,EPHB1
GO:MF	beta-catenin binding	GO:0008013	0.0165623	1.78088	91	1395	16	25412	SMAD3,RORA,CTNND2,PTPRT,CTNNA2,FOXO3,PIN1,APC,TBL1XR1,PTPRJ,NUMB,GLI3,AXIN2,DVL3,DACT2,SOX9
GO:MF	nuclear receptor activity	GO:0004879	0.0184985	1.73286	47	1395	11	25412	RORA,ESRRG,PGR,NR1D1,ESRRB,PPARD,PPARG,NR2F6,ESRRA,PPARA,NR1D2
GO:MF	transcription coactivator binding	GO:0001223	0.0184985	1.73286	47	1395	11	25412	SMAD3,RORA,VGLL4,PGR,CIT,PPARD,ZBTB17,EPAS1,PPARA,MED1,ZBTB8A
GO:MF	ligand-activated transcription factor activity	GO:0098531	0.0184985	1.73286	47	1395	11	25412	RORA,ESRRG,PGR,NR1D1,ESRRB,PPARD,PPARG,NR2F6,ESRRA,PPARA,NR1D2
GO:MF	cholesterol binding	GO:0015485	0.0184985	1.73286	47	1395	11	25412	OSBP2,OSBPL3,OSBPL1A,STARD3,STARD4,NFE2L1,GRAMD1B,CYP11A1,OSBPL6,OSBPL8,SIDT1
GO:MF	ligand-gated calcium channel activity	GO:0099604	0.0190556	1.71998	25	1395	8	25412	GRIN2A,ITPR1,RYR1,GRIN1,TRPM4,RYR2,GRIN2C,ITPR2
GO:MF	cytoskeletal motor activity	GO:0003774	0.01923	1.71602	112	1395	18	25412	KIF5C,MYO5C,MYO5A,MYH7B,MYO18A,MYH2,MYO1E,PIN1,MYH10,MYH7,MYO6,KIF1C,MYH4,MYO1B,MYH1,KIFC2,DYNC1H1,MYH9
GO:MF	phosphatase regulator activity	GO:0019208	0.0220995	1.65562	103	1395	17	25412	ARPP19,CALM1,LMTK2,PPP2R2C,PHACTR1,PTN,PPP1R37,PPP3R1,TESC,PPP1R9B,PHACTR3,PPP1R1B,MGAT5,MTMR12,PPP1R1A,PPP6R1,BMP2
GO:MF	phosphatase inhibitor activity	GO:0019212	0.0228159	1.64176	48	1395	11	25412	ARPP19,LMTK2,PHACTR1,PTN,PPP1R37,TESC,PPP1R9B,PHACTR3,PPP1R1B,MGAT5,PPP1R1A
GO:MF	adrenergic receptor activity	GO:0004935	0.0261542	1.58246	9	1395	5	25412	ADRA1D,ADRA1B,ADRA2C,ADRB1,ADRA1A
GO:MF	Roundabout binding	GO:0048495	0.0261542	1.58246	9	1395	5	25412	LRTM2,RTN4R,RTN4RL1,LGR4,SLIT2
GO:MF	transmitter-gated ion channel activity involved in regulation of postsynaptic membrane potential	GO:1904315	0.0279719	1.55328	49	1395	11	25412	GABRD,GRIN2A,GABRA1,GRIA4,GABRB2,GLRB,GRIN1,GABRG2,GRIK5,GRIN2C,GRIK3
GO:MF	protein N-terminus binding	GO:0047485	0.0326615	1.48596	127	1395	19	25412	SNAP25,CALM1,ZMYND8,DAB2IP,HSPA1B,ACTN4,STXBP1,TPM1,PLEC,RBPJ,UNC13A,TBL1XR1,NCOR2,GRIN2C,SLA2,SMARCC1,GAD1,VWF,SMARCA4
GO:MF	bHLH transcription factor binding	GO:0043425	0.0335046	1.4749	34	1395	9	25412	SMAD3,BHLHE40,SCX,LMO2,MYOD1,ASCL1,MAP3K10,SOX9,FHL2
GO:MF	glutamate receptor activity	GO:0008066	0.0354507	1.45037	27	1395	8	25412	GRM2,GRIN2A,GRIA4,GRIN1,GRIK5,GRM4,GRIN2C,GRIK3
GO:MF	protein phosphatase inhibitor activity	GO:0004864	0.0441285	1.35528	43	1395	10	25412	ARPP19,LMTK2,PHACTR1,PTN,PPP1R37,PPP1R9B,PHACTR3,PPP1R1B,MGAT5,PPP1R1A
GO:BP	system development	GO:0048731	1.02e-86	85.9896	4533	1390	532	27543	SCRT1,MGLL,TTL,NRN1,PLCB1,FBXW7,SIPA1L1,GIT1,LZTS3,WHRN,ZFPM1,ASAP1,LGI2,LY6E,SMAD3,PTPN3,MAPK6,GFRA2,ETL4,CPNE9,TNNC1,SNAP25,SYT2,ATF6,SORBS2,GRIN2A,KCNC1,NBL1,ETNK2,PRKCB,KCNA2,OLFM1,WNT4,HEG1,WNT9A,PHOSPHO1,KCNA1,LINGO1,ATP2B2,TRPC6,BAP1,DLG4,PACSIN1,HERC6,FGF9,BRINP1,CAMK4,ARC,WFS1,ADCY1,ITPR1,NTN5,CUX2,MYBPC3,GPM6B,ZMYND8,PLXND1,CRIP2,CYFIP2,CCNG1,PPP3CA,LRTM2,BOK,BSN,RAP1GAP2,CHRDL1,SENP2,A…
GO:BP	multicellular organism development	GO:0007275	8.45e-80	79.0734	5045	1390	554	27543	SCRT1,MGLL,TTL,NRN1,ADCY9,PLCB1,FBXW7,SIPA1L1,GIT1,LZTS3,WHRN,ZFPM1,ASAP1,LGI2,LY6E,SMAD3,PTPN3,MAPK6,GFRA2,ETL4,CPNE9,TNNC1,SNAP25,SYT2,ATF6,SORBS2,GRIN2A,KCNC1,NBL1,ETNK2,PRKCB,KCNA2,OLFM1,WNT4,HEG1,WNT9A,PHOSPHO1,KCNA1,LINGO1,ATP2B2,TRPC6,BAP1,DLG4,PACSIN1,PAK1,HERC6,FGF9,BRINP1,CAMK4,ARC,WFS1,ADCY1,ITPR1,NTN5,CUX2,MYBPC3,GPM6B,ZMYND8,PLXND1,CRIP2,CYFIP2,CCNG1,PPP3CA,LRTM2,BOK,BSN,RAP1GAP2,CHR…
GO:BP	anatomical structure development	GO:0048856	1.6e-79	78.7953	6186	1390	628	27543	SCRT1,MGLL,TTL,NRN1,ADCY9,PLCB1,FBXW7,SIPA1L1,NFIC,GIT1,LZTS3,WHRN,ZFPM1,ASAP1,LGI2,LY6E,SMAD3,PTPN3,MAPK6,GFRA2,ETL4,CPNE9,TNNC1,SNAP25,ZFP703,SYT2,ATF6,SORBS2,GRIN2A,KCNC1,NBL1,ETNK2,PRKCB,KCNA2,OLFM1,WNT4,HEG1,WNT9A,PHOSPHO1,KCNA1,LINGO1,ATP2B2,TRPC6,BAP1,DLG4,MEI1,PACSIN1,PAK1,HERC6,FGF9,BRINP1,CAMK4,ARC,WFS1,ADCY1,ITPR1,NTN5,CUX2,MYBPC3,GPM6B,ZMYND8,PLXND1,CRIP2,CYFIP2,CCNG1,PPP3CA,LRTM2,BOK…
GO:BP	localization	GO:0051179	4.11e-77	76.386	6297	1390	630	27543	MAP6D1,SCRT1,ENDOU,TTL,RPH3A,NRN1,GABRD,PLCB1,FBXW7,ANO3,GIT1,WHRN,LY6E,NOS1AP,SMAD3,PTPN3,CUX1,GRM2,TNNC1,SNAP25,TTC7B,ZFP703,SYT2,SORBS2,GRIN2A,DIO2,KCNC1,NBL1,CD6,PRKCB,KCNA2,CALM1,PLCB4,SLC39A10,WNT4,STARD10,SLC13A5,RIMS3,HEG1,KCNA1,SLC24A2,CACNA1I,ATP2B2,TRPC6,SEC14L1,LASP1,DLG4,MEI1,LRRC8B,PACSIN1,PITPNM2,PAK1,CHST2,FGF9,ARC,WFS1,ADCY1,ITPR1,ATP1A1,GPM6B,ZMYND8,PLXND1,PPP3CA,SFXN5,BOK,BSN,D…
GO:BP	nervous system development	GO:0007399	3.86e-76	75.4139	2479	1390	357	27543	SCRT1,MGLL,TTL,NRN1,PLCB1,SIPA1L1,GIT1,LZTS3,WHRN,ASAP1,LGI2,MAPK6,GFRA2,CPNE9,SNAP25,SYT2,GRIN2A,KCNC1,NBL1,KCNA2,OLFM1,WNT4,WNT9A,KCNA1,LINGO1,ATP2B2,TRPC6,DLG4,PACSIN1,BRINP1,ARC,ADCY1,ITPR1,NTN5,CUX2,GPM6B,ZMYND8,PLXND1,CYFIP2,CCNG1,PPP3CA,LRTM2,BOK,BSN,RAP1GAP2,CHRDL1,ATP2B1,S1PR1,RIMS1,KIF5C,RBFOX1,GABRA1,ACAP3,RTN4R,LMTK2,ASTN2,TYRO3,SYNDIG1,PIP5K1C,RORA,ARHGEF9,MAN2A1,RGS7,PHACTR1,LIFR,NR…
GO:BP	developmental process	GO:0032502	6.14e-76	75.212	6788	1390	658	27543	SCRT1,MGLL,TTL,NRN1,ADCY9,PLCB1,FBXW7,SIPA1L1,NFIC,GIT1,LZTS3,WHRN,ZFPM1,ASAP1,LGI2,CCDC3,LY6E,SMAD3,PTPN3,MAPK6,GFRA2,ETL4,CPNE9,TNNC1,SNAP25,ZFP703,SYT2,ATF6,SORBS2,GRIN2A,DIO2,KCNC1,NBL1,ETNK2,PRKCB,KCNA2,OLFM1,WNT4,HEG1,WNT9A,PHOSPHO1,KCNA1,LINGO1,ATP2B2,TRPC6,BAP1,DLG4,JDP2,MEI1,PACSIN1,PAK1,HERC6,FGF9,BRINP1,CAMK4,ARC,WFS1,ADCY1,ITPR1,NTN5,CUX2,MYBPC3,GPM6B,ZMYND8,PLXND1,CRIP2,CYFIP2,CCNG1,…
GO:BP	biological regulation	GO:0065007	2.29e-75	74.6396	14043	1390	1042	27543	LYNX1,MAPK4,MAP6D1,SCRT1,ARPP19,MGLL,TTL,ADRA1D,RPH3A,NRN1,ADCY9,GABRD,PLCB1,STARD8,FBXW7,ANO3,CAMKK2,DGKZ,SIPA1L1,NFIC,GIT1,LZTS3,WHRN,ZFPM1,ASAP1,CCDC3,LY6E,NOS1AP,SMAD3,RGS20,PTPN3,CUX1,KCTD1,GRM2,MAPK6,GFRA2,KCTD17,CPNE9,TNNC1,SNAP25,EVC2,ZNFX1,ZFP703,SYT2,ATF6,SORBS2,GRIN2A,DIO2,KCNC1,NLK,NBL1,CD6,PDP1,ARHGEF17,PRKCB,KCNA2,CALM1,OLFM1,HKDC1,PLCB4,SLC39A10,WNT4,STARD10,RIMS3,HEG1,WNT9A,PHOSPH…
GO:BP	regulation of cellular process	GO:0050794	1.03e-70	69.9883	12487	1390	958	27543	LYNX1,MAPK4,MAP6D1,SCRT1,ARPP19,MGLL,TTL,ADRA1D,RPH3A,NRN1,ADCY9,GABRD,PLCB1,STARD8,FBXW7,CAMKK2,DGKZ,SIPA1L1,NFIC,GIT1,LZTS3,ZFPM1,ASAP1,CCDC3,LY6E,NOS1AP,SMAD3,RGS20,PTPN3,CUX1,KCTD1,GRM2,MAPK6,GFRA2,KCTD17,CPNE9,TNNC1,SNAP25,EVC2,ZFP703,SYT2,ATF6,SORBS2,GRIN2A,KCNC1,NLK,NBL1,CD6,PRKCB,KCNA2,CALM1,OLFM1,PLCB4,SLC39A10,WNT4,STARD10,RIMS3,HEG1,WNT9A,KCNA1,SLC24A2,RASD1,DUSP7,CACNA1I,LINGO1,ATP2B2…
GO:BP	regulation of cell communication	GO:0010646	8.27e-69	68.0827	3453	1390	420	27543	LYNX1,MGLL,RPH3A,NRN1,PLCB1,STARD8,FBXW7,DGKZ,SIPA1L1,GIT1,CCDC3,LY6E,SMAD3,RGS20,GRM2,SNAP25,ZFP703,ATF6,GRIN2A,NLK,NBL1,PRKCB,CALM1,PLCB4,SLC39A10,WNT4,STARD10,RIMS3,HEG1,WNT9A,SLC24A2,DUSP7,ATP2B2,SEC14L1,DLG4,SCUBE1,PAK1,FGF9,ARC,WFS1,ADCY1,ITPR1,CUX2,ZMYND8,CYFIP2,PPP3CA,BOK,DLGAP3,RAP1GAP2,DLGAP1,CHRDL1,IGFBP4,APLN,ADORA1,RTN4R,TYRO3,RORA,LYPD6,ABHD6,IQSEC2,CACNB3,RGS7,NRXN1,NETO2,PPP1R9A,L…
GO:BP	regulation of biological process	GO:0050789	3.78e-68	67.4228	13329	1390	993	27543	LYNX1,MAPK4,MAP6D1,SCRT1,ARPP19,MGLL,TTL,ADRA1D,RPH3A,NRN1,ADCY9,GABRD,PLCB1,STARD8,FBXW7,CAMKK2,DGKZ,SIPA1L1,NFIC,GIT1,LZTS3,WHRN,ZFPM1,ASAP1,CCDC3,LY6E,NOS1AP,SMAD3,RGS20,PTPN3,CUX1,KCTD1,GRM2,MAPK6,GFRA2,KCTD17,CPNE9,TNNC1,SNAP25,EVC2,ZNFX1,ZFP703,SYT2,ATF6,SORBS2,GRIN2A,DIO2,KCNC1,NLK,NBL1,CD6,PRKCB,KCNA2,CALM1,OLFM1,PLCB4,SLC39A10,WNT4,STARD10,RIMS3,HEG1,WNT9A,PHOSPHO1,KCNA1,SLC24A2,RASD1,DU…
GO:BP	regulation of signaling	GO:0023051	6.59e-68	67.1811	3463	1390	419	27543	LYNX1,MGLL,RPH3A,NRN1,PLCB1,STARD8,FBXW7,DGKZ,SIPA1L1,GIT1,CCDC3,LY6E,SMAD3,RGS20,GRM2,SNAP25,ZFP703,ATF6,GRIN2A,NLK,NBL1,PRKCB,CALM1,PLCB4,SLC39A10,WNT4,STARD10,RIMS3,HEG1,WNT9A,SLC24A2,DUSP7,ATP2B2,SEC14L1,DLG4,SCUBE1,PAK1,FGF9,ARC,WFS1,ADCY1,ITPR1,CUX2,ZMYND8,CYFIP2,PPP3CA,BOK,DLGAP3,RAP1GAP2,DLGAP1,CHRDL1,IGFBP4,APLN,ADORA1,RTN4R,TYRO3,RORA,LYPD6,ABHD6,IQSEC2,CACNB3,RGS7,NRXN1,NETO2,PPP1R9A,L…
GO:BP	anatomical structure morphogenesis	GO:0009653	9.88e-66	65.0053	2781	1390	363	27543	MGLL,TTL,NRN1,FBXW7,SIPA1L1,NFIC,LZTS3,WHRN,ZFPM1,LY6E,SMAD3,CPNE9,TNNC1,SYT2,NBL1,PRKCB,KCNA2,OLFM1,WNT4,HEG1,WNT9A,PHOSPHO1,ATP2B2,TRPC6,BAP1,DLG4,PACSIN1,PAK1,FGF9,ARC,ADCY1,ITPR1,NTN5,CUX2,MYBPC3,PLXND1,CYFIP2,CCNG1,PPP3CA,LRTM2,S1PR1,RIMS1,KIF5C,APLN,FMN1,RTN4R,LMTK2,ASTN2,INF2,TYRO3,PIP5K1C,RORA,MAN2A1,PHACTR1,LIFR,NRXN1,PPP1R9A,FSTL4,GCNT4,RILPL1,ERBB4,CDK5R2,FJX1,DAB2IP,BMPER,MYO5A,INPPL1…
GO:BP	regulation of biological quality	GO:0065008	5.65e-65	64.2482	4029	1390	454	27543	MGLL,TTL,RPH3A,NRN1,GABRD,PLCB1,FBXW7,ANO3,SIPA1L1,GIT1,LZTS3,WHRN,ZFPM1,NOS1AP,SMAD3,PTPN3,GRM2,KCTD17,TNNC1,SNAP25,SYT2,GRIN2A,DIO2,KCNC1,NLK,PRKCB,KCNA2,CALM1,OLFM1,HKDC1,SLC39A10,WNT4,RIMS3,HEG1,KCNA1,SLC24A2,CACNA1I,MYL4,ATP2B2,TRPC6,BAP1,DLG4,PACSIN1,ARC,WFS1,ADCY1,ITPR1,CUX2,ATP1A1,GPM6B,ZMYND8,PLXND1,CYFIP2,PPP3CA,LRTM2,BOK,RAP1GAP2,CHRDL1,SENP2,ATP2B1,S1PR1,GABRA1,APLN,ADORA1,SLC25A23,FM…
GO:BP	neurogenesis	GO:0022008	4.77e-63	62.3216	1822	1390	279	27543	SCRT1,MGLL,TTL,NRN1,SIPA1L1,GIT1,LZTS3,WHRN,ASAP1,MAPK6,CPNE9,SNAP25,SYT2,GRIN2A,NBL1,OLFM1,WNT4,WNT9A,KCNA1,LINGO1,ATP2B2,TRPC6,DLG4,PACSIN1,BRINP1,ARC,ADCY1,ITPR1,NTN5,CUX2,GPM6B,ZMYND8,PLXND1,CYFIP2,PPP3CA,LRTM2,BOK,RAP1GAP2,CHRDL1,S1PR1,RIMS1,KIF5C,ACAP3,RTN4R,LMTK2,ASTN2,PIP5K1C,RORA,MAN2A1,PHACTR1,LIFR,NRXN1,PPP1R9A,FSTL4,CDK16,ERBB4,CDK5R2,FUT9,DAB2IP,STX1B,AKT2,IQSEC1,ZBTB18,INPPL1,PTN,CN…
GO:BP	cell development	GO:0048468	4.94e-62	61.3062	2426	1390	328	27543	MGLL,TTL,NRN1,PLCB1,FBXW7,SIPA1L1,GIT1,LZTS3,WHRN,ZFPM1,ASAP1,SMAD3,MAPK6,CPNE9,SNAP25,SYT2,SORBS2,NBL1,OLFM1,WNT4,HEG1,LINGO1,ATP2B2,TRPC6,BAP1,DLG4,MEI1,PACSIN1,BRINP1,ARC,ADCY1,ITPR1,NTN5,CUX2,GPM6B,ZMYND8,PLXND1,CYFIP2,PPP3CA,LRTM2,RAP1GAP2,RIMS1,KIF5C,ACAP3,RTN4R,LMTK2,TYRO3,PIP5K1C,EXPH5,MAN2A1,PHACTR1,LIFR,NRXN1,PPP1R9A,FSTL4,CDK16,MAF,RILPL1,ERBB4,CDK5R2,FUT9,DAB2IP,STX1B,AKT2,IQSEC1,ZBTB…
GO:BP	cellular developmental process	GO:0048869	6.65e-61	60.1772	4678	1390	490	27543	SCRT1,MGLL,TTL,NRN1,PLCB1,FBXW7,SIPA1L1,GIT1,LZTS3,WHRN,ZFPM1,ASAP1,CCDC3,SMAD3,MAPK6,CPNE9,SNAP25,ZFP703,SYT2,SORBS2,GRIN2A,DIO2,NBL1,OLFM1,WNT4,HEG1,WNT9A,KCNA1,LINGO1,ATP2B2,TRPC6,BAP1,DLG4,JDP2,MEI1,PACSIN1,HERC6,FGF9,BRINP1,CAMK4,ARC,ADCY1,ITPR1,NTN5,CUX2,GPM6B,ZMYND8,PLXND1,CYFIP2,PPP3CA,LRTM2,BOK,RAP1GAP2,CHRDL1,SENP2,S1PR1,RIMS1,KIF5C,RBFOX1,ACAP3,MEDAG,RTN4R,LMTK2,ASTN2,TYRO3,PIP5K1C,EXP…
GO:BP	generation of neurons	GO:0048699	1.35e-60	59.8704	1587	1390	254	27543	SCRT1,MGLL,TTL,NRN1,SIPA1L1,GIT1,LZTS3,WHRN,ASAP1,MAPK6,CPNE9,SNAP25,SYT2,NBL1,OLFM1,WNT4,WNT9A,KCNA1,LINGO1,ATP2B2,TRPC6,DLG4,PACSIN1,BRINP1,ARC,ADCY1,ITPR1,NTN5,CUX2,GPM6B,ZMYND8,PLXND1,CYFIP2,PPP3CA,LRTM2,RAP1GAP2,CHRDL1,S1PR1,RIMS1,KIF5C,ACAP3,RTN4R,LMTK2,ASTN2,PIP5K1C,RORA,PHACTR1,LIFR,NRXN1,PPP1R9A,FSTL4,CDK16,ERBB4,CDK5R2,FUT9,DAB2IP,STX1B,IQSEC1,ZBTB18,INPPL1,PTN,CNTNAP1,SHANK1,RAPGEF4,BR…
GO:BP	cell differentiation	GO:0030154	1.62e-60	59.7897	4646	1390	487	27543	SCRT1,MGLL,TTL,NRN1,PLCB1,FBXW7,SIPA1L1,GIT1,LZTS3,WHRN,ZFPM1,ASAP1,CCDC3,SMAD3,MAPK6,CPNE9,SNAP25,ZFP703,SYT2,SORBS2,GRIN2A,DIO2,NBL1,OLFM1,WNT4,HEG1,WNT9A,KCNA1,LINGO1,ATP2B2,TRPC6,BAP1,DLG4,JDP2,MEI1,PACSIN1,HERC6,FGF9,BRINP1,CAMK4,ARC,ADCY1,ITPR1,NTN5,CUX2,GPM6B,ZMYND8,PLXND1,CYFIP2,PPP3CA,LRTM2,BOK,RAP1GAP2,CHRDL1,SENP2,S1PR1,RIMS1,KIF5C,RBFOX1,ACAP3,MEDAG,RTN4R,LMTK2,ASTN2,TYRO3,PIP5K1C,EXP…
GO:BP	positive regulation of biological process	GO:0048518	3.21e-60	59.4935	6629	1390	613	27543	ARPP19,MGLL,TTL,PLCB1,FBXW7,CAMKK2,DGKZ,NFIC,GIT1,WHRN,ZFPM1,ASAP1,CCDC3,NOS1AP,SMAD3,MAPK6,KCTD17,CPNE9,SNAP25,ZNFX1,ZFP703,SYT2,ATF6,GRIN2A,DIO2,KCNC1,NBL1,CD6,PRKCB,CALM1,OLFM1,SLC39A10,WNT4,STARD10,RIMS3,HEG1,WNT9A,KCNA1,SLC24A2,CACNA1I,ATP2B2,TRPC6,DLG4,JDP2,CAMTA2,SCUBE1,PACSIN1,PAK1,CHST2,FGF9,BRINP1,CAMK4,ARC,WFS1,ADCY1,ITPR1,CUX2,ATP1A1,GPM6B,ZMYND8,PLXND1,TRIM37,CRIP2,CYFIP2,PPP3CA,LRTM…
GO:BP	cell junction organization	GO:0034330	3.62e-60	59.4417	750	1390	169	27543	RPH3A,DGKZ,SIPA1L1,GIT1,LZTS3,WHRN,LGI2,NOS1AP,SMAD3,ZFP703,SORBS2,GRIN2A,WNT4,RIMS3,HEG1,ATP2B2,DLG4,ARC,CUX2,GPM6B,ZMYND8,PLXND1,LRTM2,BSN,DLGAP3,DLGAP1,CHRDL1,GABRA1,FMN1,SYNDIG1,ARHGEF9,CACNB3,NRXN1,PPP1R9A,SLC6A1,ERBB4,DAB2IP,MYO5A,IQSEC1,PTN,CNTNAP1,SHANK1,RAPGEF4,SPTBN2,GABRB2,FARP1,PTPRD,DMTN,CLSTN1,EFNA5,ABHD17A,GLRB,CNKSR2,RIMS4,SHANK3,HOMER1,EXT1,ACTN4,NPTN,LRRK2,CTNND2,ERC2,FAM107A,AP…
GO:BP	neuron differentiation	GO:0030182	3.85e-59	58.415	1514	1390	245	27543	MGLL,TTL,NRN1,SIPA1L1,GIT1,LZTS3,WHRN,ASAP1,MAPK6,CPNE9,SNAP25,SYT2,NBL1,OLFM1,WNT4,WNT9A,LINGO1,ATP2B2,TRPC6,DLG4,PACSIN1,BRINP1,ARC,ADCY1,ITPR1,NTN5,CUX2,GPM6B,ZMYND8,PLXND1,CYFIP2,PPP3CA,LRTM2,RAP1GAP2,CHRDL1,S1PR1,RIMS1,KIF5C,ACAP3,RTN4R,LMTK2,PIP5K1C,RORA,PHACTR1,LIFR,NRXN1,PPP1R9A,FSTL4,CDK16,ERBB4,CDK5R2,FUT9,DAB2IP,STX1B,IQSEC1,ZBTB18,INPPL1,PTN,CNTNAP1,SHANK1,RAPGEF4,BRINP2,SPIRE1,GABRB2…
GO:BP	regulation of localization	GO:0032879	5.07e-59	58.2946	2881	1390	358	27543	SCRT1,TTL,RPH3A,NRN1,PLCB1,FBXW7,GIT1,NOS1AP,SMAD3,PTPN3,GRM2,TNNC1,SNAP25,ZFP703,SORBS2,GRIN2A,KCNC1,NBL1,PRKCB,KCNA2,CALM1,PLCB4,WNT4,RIMS3,KCNA1,CACNA1I,ATP2B2,TRPC6,DLG4,PACSIN1,PAK1,CHST2,FGF9,ARC,WFS1,ADCY1,ITPR1,ATP1A1,GPM6B,ZMYND8,PLXND1,PPP3CA,BOK,BSN,ATP2B1,S1PR1,SCN8A,ZDHHC8,APLN,ADORA1,SLC25A23,ASTN2,PIP5K1C,EXPH5,ABHD6,IQSEC2,CACNB3,SLC30A4,RGS7,PHACTR1,NRXN1,DPP10,NETO2,PPP1R9A,SLC6…
GO:BP	cell-cell signaling	GO:0007267	7.93e-57	56.1005	1690	1390	257	27543	LYNX1,MGLL,RPH3A,NRN1,GABRD,PLCB1,DGKZ,SIPA1L1,GIT1,LY6E,SMAD3,GRM2,SNAP25,ZFP703,SYT2,SORBS2,GRIN2A,DIO2,NLK,PRKCB,KCNA2,CALM1,PLCB4,WNT4,RIMS3,WNT9A,SLC24A2,ATP2B2,DLG4,FGF9,ARC,ADCY1,CUX2,ZMYND8,PPP3CA,DLGAP3,DLGAP1,CHRDL1,SENP2,GABRA1,APLN,ADORA1,LYPD6,ABHD6,IQSEC2,CACNB3,NRXN1,PPP1R9A,LRRC32,SLC6A1,CDK16,GRIA4,DKKL1,ERBB4,FJX1,CPLX2,DAB2IP,STX1B,MYO5A,OLFR78,PTN,SHANK1,RAPGEF4,SPTBN2,GABRB2,…
GO:BP	cell morphogenesis	GO:0000902	3.75e-55	54.4256	1086	1390	198	27543	MGLL,TTL,NRN1,SIPA1L1,LZTS3,WHRN,ZFPM1,CPNE9,SYT2,NBL1,OLFM1,HEG1,ATP2B2,TRPC6,BAP1,DLG4,PACSIN1,ARC,ADCY1,ITPR1,NTN5,CUX2,PLXND1,CYFIP2,PPP3CA,LRTM2,RIMS1,KIF5C,RTN4R,LMTK2,TYRO3,PIP5K1C,PHACTR1,LIFR,PPP1R9A,FSTL4,RILPL1,CDK5R2,DAB2IP,PTN,CNTNAP1,SHANK1,ATRNL1,CNTN4,MAP1A,FARP1,SLC1A3,MPL,RTN4RL1,CCDC88C,PTPRD,DMTN,ADARB1,EFNA5,SYT1,MEGF9,PREX2,SHANK3,FBXO31,SCN1B,EXT1,ACTN4,NPTN,LRRK2,CTNND2,ST…
GO:BP	synapse organization	GO:0050808	2.03e-54	53.6924	480	1390	129	27543	RPH3A,DGKZ,SIPA1L1,GIT1,LZTS3,LGI2,NOS1AP,SORBS2,GRIN2A,RIMS3,ATP2B2,DLG4,ARC,CUX2,ZMYND8,PLXND1,LRTM2,BSN,DLGAP3,DLGAP1,CHRDL1,GABRA1,SYNDIG1,ARHGEF9,CACNB3,NRXN1,PPP1R9A,SLC6A1,ERBB4,DAB2IP,MYO5A,PTN,CNTNAP1,SHANK1,RAPGEF4,SPTBN2,GABRB2,FARP1,PTPRD,CLSTN1,EFNA5,ABHD17A,GLRB,CNKSR2,RIMS4,SHANK3,HOMER1,NPTN,LRRK2,CTNND2,ERC2,APBB1,PTPRT,NRCAM,PTK2,CTNNA2,GRIN1,SRCIN1,CACNG2,GABRG2,CACNB4,LRRC4C,N…
GO:BP	positive regulation of cellular process	GO:0048522	4.41e-54	53.3557	6072	1390	564	27543	ARPP19,TTL,PLCB1,FBXW7,CAMKK2,DGKZ,NFIC,GIT1,ZFPM1,ASAP1,CCDC3,NOS1AP,SMAD3,KCTD17,CPNE9,SNAP25,ZFP703,SYT2,ATF6,GRIN2A,KCNC1,NBL1,CD6,PRKCB,CALM1,OLFM1,SLC39A10,WNT4,STARD10,RIMS3,WNT9A,KCNA1,SLC24A2,CACNA1I,TRPC6,DLG4,JDP2,CAMTA2,SCUBE1,PACSIN1,PAK1,CHST2,FGF9,BRINP1,CAMK4,ARC,WFS1,ADCY1,ITPR1,CUX2,ZMYND8,PLXND1,TRIM37,CRIP2,CYFIP2,PPP3CA,LRTM2,BOK,SENP2,S1PR1,RIMS1,IGFBP4,APLN,ADORA1,MEDAG,FMN…
GO:BP	neuron development	GO:0048666	1.36e-50	49.8664	1241	1390	206	27543	MGLL,TTL,NRN1,SIPA1L1,GIT1,LZTS3,WHRN,ASAP1,MAPK6,CPNE9,SNAP25,SYT2,NBL1,OLFM1,LINGO1,ATP2B2,TRPC6,DLG4,PACSIN1,ARC,ADCY1,ITPR1,NTN5,CUX2,GPM6B,ZMYND8,PLXND1,CYFIP2,PPP3CA,LRTM2,RAP1GAP2,RIMS1,KIF5C,ACAP3,RTN4R,LMTK2,PIP5K1C,PHACTR1,LIFR,NRXN1,PPP1R9A,FSTL4,CDK16,CDK5R2,FUT9,DAB2IP,STX1B,IQSEC1,ZBTB18,INPPL1,PTN,CNTNAP1,SHANK1,RAPGEF4,SPIRE1,GABRB2,CNTN4,MAP1A,FARP1,SLC1A3,RTN4RL1,PTPRD,NTM,ADARB…
GO:BP	regulation of signal transduction	GO:0009966	1.94e-50	49.7124	2898	1390	342	27543	LYNX1,MGLL,RPH3A,PLCB1,STARD8,FBXW7,DGKZ,SIPA1L1,GIT1,CCDC3,LY6E,SMAD3,RGS20,GRM2,ZFP703,ATF6,GRIN2A,NLK,NBL1,PRKCB,CALM1,SLC39A10,WNT4,STARD10,HEG1,WNT9A,DUSP7,SEC14L1,DLG4,SCUBE1,PAK1,FGF9,ARC,WFS1,ITPR1,CUX2,ZMYND8,CYFIP2,BOK,DLGAP3,RAP1GAP2,DLGAP1,CHRDL1,IGFBP4,APLN,ADORA1,RTN4R,TYRO3,RORA,LYPD6,ABHD6,IQSEC2,CACNB3,RGS7,NRXN1,NETO2,FSTL4,ARAP2,ALOX12B,DKKL1,ERBB4,DAB2IP,STX1B,AKT2,BMPER,IQSEC…
GO:BP	negative regulation of cellular process	GO:0048523	6.09e-50	49.2156	5155	1390	496	27543	MAP6D1,SCRT1,ARPP19,MGLL,PLCB1,FBXW7,DGKZ,NFIC,GIT1,ZFPM1,CCDC3,NOS1AP,SMAD3,RGS20,PTPN3,KCTD1,GFRA2,ZFP703,NLK,NBL1,PRKCB,CALM1,SLC39A10,WNT4,HEG1,WNT9A,SLC24A2,RASD1,DUSP7,LINGO1,TRPC6,SEC14L1,BAP1,DLG4,JDP2,PACSIN1,PAK1,FGF9,BRINP1,ARC,WFS1,ITPR1,CUX2,ATP1A1,GPM6B,ZMYND8,PLXND1,TRIM37,CCNG1,PPP3CA,BOK,RAP1GAP2,CHRDL1,SENP2,S1PR1,APLN,ADORA1,RTN4R,ASTN2,TYRO3,RORA,ABHD6,ARHGAP10,CACNB3,RGS7,LIF…
GO:BP	neuron projection development	GO:0031175	6.61e-50	49.1797	1085	1390	190	27543	MGLL,TTL,NRN1,SIPA1L1,GIT1,LZTS3,WHRN,ASAP1,MAPK6,CPNE9,SNAP25,SYT2,NBL1,OLFM1,LINGO1,ATP2B2,TRPC6,DLG4,PACSIN1,ARC,ADCY1,ITPR1,NTN5,CUX2,GPM6B,ZMYND8,PLXND1,CYFIP2,PPP3CA,LRTM2,RAP1GAP2,RIMS1,KIF5C,ACAP3,RTN4R,LMTK2,PIP5K1C,PHACTR1,LIFR,NRXN1,PPP1R9A,FSTL4,CDK16,CDK5R2,FUT9,DAB2IP,STX1B,IQSEC1,INPPL1,PTN,CNTNAP1,SHANK1,RAPGEF4,SPIRE1,CNTN4,MAP1A,FARP1,RTN4RL1,PTPRD,NTM,ADARB1,EFNA5,SYT1,PREX2,SH…
GO:BP	regulation of response to stimulus	GO:0048583	8.77e-50	49.0571	3926	1390	414	27543	LYNX1,MGLL,RPH3A,PLCB1,STARD8,FBXW7,DGKZ,SIPA1L1,GIT1,CCDC3,LY6E,SMAD3,RGS20,GRM2,TNNC1,ZNFX1,ZFP703,ATF6,GRIN2A,NLK,NBL1,PRKCB,CALM1,SLC39A10,WNT4,STARD10,HEG1,WNT9A,DUSP7,SEC14L1,BAP1,DLG4,SCUBE1,PAK1,FGF9,ARC,WFS1,ITPR1,CUX2,ZMYND8,CYFIP2,PPP3CA,BOK,DLGAP3,RAP1GAP2,DLGAP1,CHRDL1,ATP2B1,S1PR1,IGFBP4,APLN,ADORA1,SLC25A23,RTN4R,TYRO3,RORA,LYPD6,ABHD6,IQSEC2,CACNB3,RGS7,NRXN1,NETO2,FSTL4,ARAP2,ALO…
GO:BP	animal organ development	GO:0048513	7.86e-49	48.1045	3856	1390	407	27543	PLCB1,FBXW7,NFIC,GIT1,WHRN,ZFPM1,LY6E,SMAD3,PTPN3,TNNC1,ZFP703,ATF6,SORBS2,KCNC1,NBL1,ETNK2,OLFM1,WNT4,HEG1,WNT9A,PHOSPHO1,KCNA1,ATP2B2,BAP1,HERC6,FGF9,CAMK4,WFS1,ADCY1,ITPR1,NTN5,MYBPC3,GPM6B,PLXND1,CRIP2,CCNG1,PPP3CA,BOK,CHRDL1,SENP2,ATP2B1,S1PR1,RBFOX1,APLN,FMN1,RTN4R,TYRO3,EXPH5,RORA,IL11RA1,MAN2A1,RGS7,PHACTR1,LIFR,NRXN1,ALOX12B,GCNT4,MAF,ERBB4,CDK5R2,FJX1,DAB2IP,BMPER,MYO5A,ZBTB18,INPPL1,MY…
GO:BP	multicellular organismal process	GO:0032501	1.19e-48	47.924	8766	1390	708	27543	SCRT1,MGLL,ENDOU,TTL,NRN1,ADCY9,GABRD,PLCB1,FBXW7,SIPA1L1,GIT1,LZTS3,WHRN,ZFPM1,ASAP1,LGI2,LY6E,NOS1AP,SMAD3,PTPN3,GRM2,MAPK6,GFRA2,ETL4,CPNE9,TNNC1,SNAP25,ZFP703,SYT2,ATF6,SORBS2,GRIN2A,DIO2,KCNC1,NBL1,ETNK2,CD6,PRKCB,KCNA2,CALM1,OLFM1,WNT4,HEG1,WNT9A,PHOSPHO1,KCNA1,SLC24A2,CACNA1I,LINGO1,MYL4,ATP2B2,TRPC6,BAP1,DLG4,CAMTA2,MEI1,PACSIN1,PAK1,HERC6,FGF9,BRINP1,CAMK4,ARC,WFS1,ADCY1,ITPR1,NTN5,CUX2,…
GO:BP	cell morphogenesis involved in differentiation	GO:0000904	3.69e-48	47.4329	786	1390	157	27543	MGLL,TTL,NRN1,SIPA1L1,LZTS3,WHRN,ZFPM1,OLFM1,HEG1,ATP2B2,TRPC6,BAP1,DLG4,ARC,ADCY1,NTN5,CUX2,PLXND1,PPP3CA,LRTM2,KIF5C,RTN4R,LMTK2,TYRO3,PIP5K1C,PHACTR1,PPP1R9A,FSTL4,RILPL1,CDK5R2,PTN,CNTNAP1,SHANK1,ATRNL1,CNTN4,MAP1A,FARP1,SLC1A3,MPL,RTN4RL1,CCDC88C,PTPRD,DMTN,ADARB1,EFNA5,MEGF9,PREX2,SHANK3,FBXO31,SCN1B,EXT1,ACTN4,NPTN,LRRK2,CTNND2,BRSK2,MERTK,APBB1,NRCAM,PTK2,FERMT2,CTNNA2,GRIN1,SRCIN1,HECW1,…
GO:BP	regulation of cellular component organization	GO:0051128	1.7e-46	45.7693	2398	1390	296	27543	MAP6D1,MGLL,TTL,PLCB1,FBXW7,SIPA1L1,GIT1,LZTS3,ASAP1,SMAD3,KCTD17,CPNE9,SNAP25,SYT2,CALM1,OLFM1,WNT4,RIMS3,TRPC6,BAP1,DLG4,PACSIN1,PAK1,ARC,ITPR1,CUX2,GPM6B,ZMYND8,PLXND1,TRIM37,CYFIP2,PPP3CA,LRTM2,BOK,RAP1GAP2,S1PR1,RIMS1,IGFBP4,APLN,ACAP3,FMN1,RTN4R,INF2,SYNDIG1,PIP5K1C,ARHGEF9,NRXN1,TBC1D30,PPP1R9A,FSTL4,FUT9,SYNE1,CPLX2,DAB2IP,STX1B,AKT2,IQSEC1,INPPL1,MYLK3,PTN,SHANK1,PACSIN3,RAPGEF4,SPIRE1,S…
GO:BP	cell communication	GO:0007154	3.14e-46	45.5036	7546	1390	632	27543	LYNX1,MAPK4,MGLL,ADRA1D,RPH3A,NRN1,ADCY9,GABRD,PLCB1,STARD8,FBXW7,CAMKK2,DGKZ,SIPA1L1,GIT1,CCDC3,LY6E,SMAD3,RGS20,GRM2,MAPK6,GFRA2,SNAP25,EVC2,ZFP703,SYT2,ATF6,SORBS2,GRIN2A,DIO2,NLK,NBL1,CD6,PRKCB,KCNA2,CALM1,OLFM1,PLCB4,SLC39A10,WNT4,STARD10,RIMS3,HEG1,WNT9A,KCNA1,SLC24A2,RASD1,DUSP7,CACNA1I,LINGO1,ATP2B2,SEC14L1,DLG4,SCUBE1,PACSIN1,PITPNM2,PAK1,FGF9,ARC,WFS1,ADCY1,ITPR1,WSB2,CUX2,PLCXD2,ZMYND8…
GO:BP	movement of cell or subcellular component	GO:0006928	4.17e-46	45.3802	2127	1390	274	27543	SCRT1,PLCB1,FBXW7,SMAD3,TNNC1,ZFP703,NBL1,WNT4,CACNA1I,PAK1,CHST2,FGF9,ARC,NTN5,ATP1A1,ZMYND8,PLXND1,PPP3CA,LRTM2,BSN,S1PR1,KIF5C,ADORA1,ACAP3,RTN4R,LMTK2,ASTN2,TYRO3,ABHD6,PHACTR1,MYO5C,ERBB4,CDK5R2,FUT9,DAB2IP,AKT2,BMPER,MYO5A,IQSEC1,OLFR78,PTN,ATRNL1,RAPGEF4,MYRIP,CNTN4,MAP1A,DUSP1,ASH1L,RTN4RL1,CCDC88C,DMTN,CADM4,ADARB1,EFNA5,RASGRP1,MEGF9,FBXO31,MYO18A,SCN1B,EXT1,ACTN4,ZMIZ1,NPTN,LRRK2,PPP1R…
GO:BP	cell projection organization	GO:0030030	1.28e-45	44.8936	1627	1390	232	27543	MGLL,TTL,RPH3A,NRN1,SIPA1L1,GIT1,LZTS3,WHRN,ASAP1,MAPK6,KCTD17,CPNE9,SNAP25,SYT2,GRIN2A,NBL1,OLFM1,LINGO1,ATP2B2,TRPC6,DLG4,PACSIN1,ARC,ADCY1,ITPR1,NTN5,CUX2,GPM6B,ZMYND8,PLXND1,CYFIP2,PPP3CA,LRTM2,RAP1GAP2,S1PR1,RIMS1,KIF5C,ACAP3,RTN4R,LMTK2,PIP5K1C,PHACTR1,LIFR,NRXN1,TBC1D30,PPP1R9A,FSTL4,CDK16,RILPL1,CDK5R2,FUT9,SYNE1,DAB2IP,STX1B,IQSEC1,INPPL1,PTN,CNTNAP1,SHANK1,RAPGEF4,SPIRE1,TTYH1,CNTN4,MAP…
GO:BP	signaling	GO:0023052	3.19e-45	44.4959	7473	1390	625	27543	LYNX1,MAPK4,MGLL,ADRA1D,RPH3A,NRN1,ADCY9,GABRD,PLCB1,STARD8,FBXW7,CAMKK2,DGKZ,SIPA1L1,GIT1,CCDC3,LY6E,SMAD3,RGS20,GRM2,MAPK6,GFRA2,SNAP25,EVC2,ZFP703,SYT2,ATF6,SORBS2,GRIN2A,DIO2,NLK,NBL1,CD6,PRKCB,KCNA2,CALM1,OLFM1,PLCB4,SLC39A10,WNT4,STARD10,RIMS3,HEG1,WNT9A,KCNA1,SLC24A2,RASD1,DUSP7,CACNA1I,LINGO1,ATP2B2,SEC14L1,DLG4,SCUBE1,PACSIN1,PITPNM2,PAK1,FGF9,ARC,WFS1,ADCY1,ITPR1,WSB2,CUX2,PLCXD2,ZMYND8…
GO:BP	plasma membrane bounded cell projection organization	GO:0120036	3.35e-45	44.4753	1589	1390	228	27543	MGLL,TTL,RPH3A,NRN1,SIPA1L1,GIT1,LZTS3,WHRN,ASAP1,MAPK6,KCTD17,CPNE9,SNAP25,SYT2,GRIN2A,NBL1,OLFM1,LINGO1,ATP2B2,TRPC6,DLG4,PACSIN1,ARC,ADCY1,ITPR1,NTN5,CUX2,GPM6B,ZMYND8,PLXND1,CYFIP2,PPP3CA,LRTM2,RAP1GAP2,S1PR1,RIMS1,KIF5C,ACAP3,RTN4R,LMTK2,PIP5K1C,PHACTR1,LIFR,NRXN1,TBC1D30,PPP1R9A,FSTL4,CDK16,RILPL1,CDK5R2,FUT9,SYNE1,DAB2IP,STX1B,IQSEC1,INPPL1,PTN,CNTNAP1,SHANK1,RAPGEF4,SPIRE1,TTYH1,CNTN4,MAP…
GO:BP	cell projection morphogenesis	GO:0048858	4.52e-45	44.3449	696	1390	143	27543	MGLL,TTL,NRN1,SIPA1L1,LZTS3,CPNE9,SYT2,NBL1,OLFM1,TRPC6,DLG4,PACSIN1,ARC,ADCY1,NTN5,CUX2,PLXND1,CYFIP2,PPP3CA,LRTM2,RIMS1,KIF5C,RTN4R,LMTK2,PIP5K1C,PHACTR1,LIFR,PPP1R9A,FSTL4,CDK5R2,DAB2IP,PTN,CNTNAP1,SHANK1,CNTN4,MAP1A,FARP1,RTN4RL1,PTPRD,ADARB1,EFNA5,SYT1,PREX2,SHANK3,FBXO31,SCN1B,EXT1,NPTN,LRRK2,CTNND2,BRSK2,PRKCZ,PLEKHO1,APBB1,NRCAM,PTK2,CTNNA2,GRIN1,SRCIN1,HECW1,STXBP1,FZD3,LRRC4C,PTPRZ1,ZFP…
GO:BP	plasma membrane bounded cell projection morphogenesis	GO:0120039	9.67e-45	44.0148	691	1390	142	27543	MGLL,TTL,NRN1,SIPA1L1,LZTS3,CPNE9,SYT2,NBL1,OLFM1,TRPC6,DLG4,PACSIN1,ARC,ADCY1,NTN5,CUX2,PLXND1,CYFIP2,PPP3CA,LRTM2,RIMS1,KIF5C,RTN4R,LMTK2,PIP5K1C,PHACTR1,LIFR,PPP1R9A,FSTL4,CDK5R2,DAB2IP,PTN,CNTNAP1,SHANK1,CNTN4,MAP1A,FARP1,RTN4RL1,PTPRD,ADARB1,EFNA5,SYT1,PREX2,SHANK3,FBXO31,SCN1B,EXT1,NPTN,LRRK2,CTNND2,BRSK2,PRKCZ,PLEKHO1,APBB1,NRCAM,PTK2,CTNNA2,GRIN1,SRCIN1,HECW1,STXBP1,FZD3,LRRC4C,PTPRZ1,ZFP…
GO:BP	negative regulation of biological process	GO:0048519	1.55e-44	43.81	5996	1390	535	27543	MAP6D1,SCRT1,ARPP19,MGLL,PLCB1,FBXW7,DGKZ,NFIC,GIT1,ZFPM1,ASAP1,CCDC3,LY6E,NOS1AP,SMAD3,RGS20,PTPN3,KCTD1,GFRA2,ZNFX1,ZFP703,GRIN2A,NLK,NBL1,PRKCB,CALM1,OLFM1,PLCB4,SLC39A10,WNT4,HEG1,WNT9A,SLC24A2,RASD1,DUSP7,LINGO1,TRPC6,SEC14L1,BAP1,DLG4,JDP2,PACSIN1,PAK1,FGF9,BRINP1,ARC,WFS1,ITPR1,CUX2,ATP1A1,GPM6B,ZMYND8,PLXND1,TRIM37,CCNG1,PPP3CA,BOK,RAP1GAP2,CHRDL1,SENP2,ATP2B1,S1PR1,APLN,ADORA1,RTN4R,ASTN…
GO:BP	cell part morphogenesis	GO:0032990	1.82e-43	42.7411	726	1390	144	27543	MGLL,TTL,NRN1,SIPA1L1,LZTS3,CPNE9,SYT2,NBL1,OLFM1,TRPC6,DLG4,PACSIN1,ARC,ADCY1,NTN5,CUX2,PLXND1,CYFIP2,PPP3CA,LRTM2,RIMS1,KIF5C,RTN4R,LMTK2,PIP5K1C,PHACTR1,LIFR,PPP1R9A,FSTL4,CDK5R2,DAB2IP,PTN,CNTNAP1,SHANK1,CNTN4,MAP1A,FARP1,RTN4RL1,PTPRD,ADARB1,EFNA5,SYT1,PREX2,SHANK3,FBXO31,SCN1B,EXT1,NPTN,LRRK2,CTNND2,BRSK2,PRKCZ,PLEKHO1,APBB1,NRCAM,PTK2,CTNNA2,GRIN1,SRCIN1,HECW1,STXBP1,FZD3,LRRC4C,PTPRZ1,ZFP…
GO:BP	regulation of molecular function	GO:0065009	3.6e-43	42.4434	3003	1390	334	27543	LYNX1,ARPP19,RPH3A,PLCB1,STARD8,FBXW7,CAMKK2,DGKZ,SIPA1L1,GIT1,ZFPM1,ASAP1,LY6E,NOS1AP,SMAD3,RGS20,PTPN3,TNNC1,GRIN2A,KCNC1,PDP1,ARHGEF17,PRKCB,CALM1,SLC39A10,WNT4,HEG1,WNT9A,KCNA1,DUSP7,MYL4,TRPC6,DLG4,PAK1,ARC,WFS1,ADCY1,PLXND1,TRIM37,CYFIP2,CCNG1,PPP3CA,BOK,BSN,DLGAP3,RAP1GAP2,DLGAP1,SENP2,S1PR1,DOCK3,ADORA1,ACAP3,RTN4R,LMTK2,TYRO3,LYPD6,IQSEC2,ARHGEF9,PPP2R2C,ARHGAP10,CACNB3,RGS7,OBSCN,PHACTR…
GO:BP	neuron projection morphogenesis	GO:0048812	4.99e-43	42.3015	676	1390	138	27543	MGLL,TTL,NRN1,SIPA1L1,LZTS3,CPNE9,SYT2,NBL1,OLFM1,TRPC6,DLG4,PACSIN1,ARC,ADCY1,NTN5,CUX2,PLXND1,CYFIP2,PPP3CA,LRTM2,RIMS1,KIF5C,RTN4R,LMTK2,PIP5K1C,PHACTR1,LIFR,PPP1R9A,FSTL4,CDK5R2,DAB2IP,PTN,CNTNAP1,SHANK1,CNTN4,MAP1A,FARP1,RTN4RL1,PTPRD,ADARB1,EFNA5,SYT1,PREX2,SHANK3,FBXO31,SCN1B,EXT1,NPTN,LRRK2,CTNND2,BRSK2,PRKCZ,APBB1,NRCAM,PTK2,CTNNA2,GRIN1,SRCIN1,HECW1,STXBP1,FZD3,LRRC4C,PTPRZ1,ZFP365,SYNG…
GO:BP	establishment of localization	GO:0051234	1.73e-42	41.7621	4762	1390	452	27543	MAP6D1,ENDOU,TTL,RPH3A,NRN1,GABRD,PLCB1,FBXW7,ANO3,GIT1,WHRN,LY6E,NOS1AP,PTPN3,CUX1,GRM2,TNNC1,SNAP25,SYT2,GRIN2A,DIO2,KCNC1,CD6,PRKCB,KCNA2,CALM1,PLCB4,SLC39A10,STARD10,SLC13A5,RIMS3,KCNA1,SLC24A2,CACNA1I,ATP2B2,TRPC6,SEC14L1,LASP1,DLG4,MEI1,LRRC8B,PACSIN1,PITPNM2,FGF9,ARC,WFS1,ADCY1,ITPR1,ATP1A1,GPM6B,PPP3CA,SFXN5,BOK,BSN,SENP2,ATP2B1,SCN8A,ZDHHC8,RIMS1,KIF5C,GABRA1,APLN,ADORA1,SLC25A23,LMTK2,A…
GO:BP	locomotion	GO:0040011	1.9e-42	41.7206	1892	1390	248	27543	SCRT1,PLCB1,FBXW7,SMAD3,ZFP703,GRIN2A,NBL1,WNT4,CACNA1I,ATP2B2,PAK1,CHST2,FGF9,ARC,NTN5,ZMYND8,PLXND1,PPP3CA,LRTM2,S1PR1,KIF5C,ADORA1,ACAP3,RTN4R,LMTK2,ASTN2,TYRO3,PIP5K1C,ABHD6,PHACTR1,ERBB4,CDK5R2,FUT9,DAB2IP,AKT2,BMPER,MYO5A,IQSEC1,OLFR78,PTN,ATRNL1,RAPGEF4,CNTN4,DUSP1,ASH1L,RTN4RL1,DMTN,CADM4,ADARB1,EFNA5,MEGF9,JPH3,SHANK3,FBXO31,MYO18A,SCN1B,EXT1,ACTN4,ZMIZ1,NPTN,LRRK2,PPP1R9B,FAM107A,ADAM9,…
GO:BP	transport	GO:0006810	4.07e-42	41.3905	4607	1390	441	27543	MAP6D1,ENDOU,RPH3A,NRN1,GABRD,PLCB1,FBXW7,ANO3,GIT1,LY6E,NOS1AP,PTPN3,CUX1,GRM2,TNNC1,SNAP25,SYT2,GRIN2A,DIO2,KCNC1,CD6,PRKCB,KCNA2,CALM1,PLCB4,SLC39A10,STARD10,SLC13A5,RIMS3,KCNA1,SLC24A2,CACNA1I,ATP2B2,TRPC6,SEC14L1,LASP1,DLG4,LRRC8B,PACSIN1,PITPNM2,FGF9,ARC,WFS1,ADCY1,ITPR1,ATP1A1,GPM6B,PPP3CA,SFXN5,BOK,BSN,SENP2,ATP2B1,SCN8A,ZDHHC8,RIMS1,KIF5C,GABRA1,APLN,ADORA1,SLC25A23,LMTK2,ASTN2,TYRO3,SYN…
GO:BP	synaptic signaling	GO:0099536	8.24e-42	41.0842	896	1390	159	27543	LYNX1,MGLL,RPH3A,NRN1,GABRD,PLCB1,DGKZ,SIPA1L1,GIT1,LY6E,GRM2,SNAP25,SYT2,SORBS2,GRIN2A,PRKCB,CALM1,PLCB4,RIMS3,SLC24A2,ATP2B2,DLG4,ARC,ADCY1,CUX2,ZMYND8,PPP3CA,DLGAP3,DLGAP1,CHRDL1,GABRA1,ADORA1,ABHD6,IQSEC2,CACNB3,NRXN1,PPP1R9A,SLC6A1,GRIA4,ERBB4,CPLX2,STX1B,MYO5A,PTN,SHANK1,RAPGEF4,SPTBN2,GABRB2,MAP1A,FARP1,SLC1A3,DAGLB,PPP3R1,PRRT2,PTPRD,CLSTN1,ADARB1,GLRB,SYT1,JPH3,RIMS4,SHANK3,HOMER1,JPH4,E…
GO:BP	regulation of multicellular organismal process	GO:0051239	2.7e-41	40.5692	2854	1390	319	27543	MGLL,PLCB1,FBXW7,GIT1,ZFPM1,NOS1AP,SMAD3,TNNC1,ZFP703,GRIN2A,DIO2,CD6,PRKCB,KCNA2,CALM1,OLFM1,WNT4,HEG1,WNT9A,PHOSPHO1,KCNA1,LINGO1,MYL4,TRPC6,BAP1,DLG4,FGF9,BRINP1,CUX2,MYBPC3,ATP1A1,GPM6B,ZMYND8,PLXND1,PPP3CA,LRTM2,DLGAP3,DLGAP1,ATP2B1,S1PR1,APLN,ADORA1,RTN4R,SYNDIG1,RORA,ABHD6,MAN2A1,CACNB3,NRXN1,LRRC32,FSTL4,ALOX12B,MAF,ERBB4,DAB2IP,STX1B,BMPER,IQSEC1,OLFR78,PTN,SHANK1,VASN,RAPGEF4,CRY2,GPR37…
GO:BP	trans-synaptic signaling	GO:0099537	2.83e-41	40.5487	864	1390	155	27543	LYNX1,MGLL,RPH3A,NRN1,GABRD,PLCB1,DGKZ,SIPA1L1,GIT1,GRM2,SNAP25,SYT2,GRIN2A,PRKCB,CALM1,PLCB4,RIMS3,SLC24A2,ATP2B2,DLG4,ARC,ADCY1,CUX2,ZMYND8,PPP3CA,DLGAP3,DLGAP1,CHRDL1,GABRA1,ADORA1,ABHD6,IQSEC2,CACNB3,NRXN1,PPP1R9A,SLC6A1,GRIA4,ERBB4,CPLX2,STX1B,MYO5A,PTN,SHANK1,RAPGEF4,SPTBN2,GABRB2,MAP1A,FARP1,SLC1A3,DAGLB,PPP3R1,PRRT2,PTPRD,CLSTN1,ADARB1,GLRB,SYT1,JPH3,RIMS4,SHANK3,HOMER1,JPH4,EXT1,GLS,OTOF…
GO:BP	cellular component morphogenesis	GO:0032989	3.67e-40	39.4358	821	1390	149	27543	MGLL,TTL,NRN1,SIPA1L1,LZTS3,CPNE9,SYT2,NBL1,OLFM1,TRPC6,DLG4,PACSIN1,ARC,ADCY1,NTN5,CUX2,PLXND1,CYFIP2,PPP3CA,LRTM2,RIMS1,KIF5C,RTN4R,LMTK2,PIP5K1C,PHACTR1,LIFR,PPP1R9A,FSTL4,CDK5R2,DAB2IP,MYLK3,PTN,CNTNAP1,SHANK1,CNTN4,MAP1A,FARP1,RTN4RL1,PTPRD,ADARB1,EFNA5,SYT1,PREX2,SHANK3,FBXO31,SCN1B,EXT1,NPTN,LRRK2,CTNND2,BRSK2,PRKCZ,PLEKHO1,APBB1,NRCAM,PTK2,CTNNA2,GRIN1,SRCIN1,HECW1,STXBP1,FZD3,LRRC4C,PTPR…
GO:BP	intracellular signal transduction	GO:0035556	6.97e-40	39.1568	2516	1390	291	27543	MAPK4,ADCY9,PLCB1,STARD8,FBXW7,CAMKK2,DGKZ,SIPA1L1,GIT1,SMAD3,GRM2,MAPK6,GRIN2A,NLK,PRKCB,CALM1,PLCB4,HEG1,RASD1,DUSP7,LINGO1,SEC14L1,PITPNM2,PAK1,FGF9,WFS1,ADCY1,ITPR1,WSB2,MAST3,CCNG1,PPP3CA,BOK,RAP1GAP2,IGFBP4,DOCK3,GUCY2G,ADORA1,RTN4R,TYRO3,RORA,IQSEC2,ARHGEF9,RGS7,NRXN1,PPP1R9A,ARAP2,ALOX12B,RASGEF1B,ERBB4,RAPGEFL1,DAB2IP,AKT2,BMPER,IQSEC1,INPPL1,OLFR78,RAPGEF4,GPR37L1,DUSP1,MYH7B,TFRC,ASH1L…
GO:BP	chemical synaptic transmission	GO:0007268	7.75e-40	39.1106	856	1390	152	27543	LYNX1,MGLL,RPH3A,NRN1,GABRD,PLCB1,DGKZ,SIPA1L1,GIT1,GRM2,SNAP25,SYT2,GRIN2A,PRKCB,CALM1,PLCB4,RIMS3,SLC24A2,ATP2B2,DLG4,ARC,ADCY1,CUX2,ZMYND8,PPP3CA,DLGAP3,DLGAP1,CHRDL1,GABRA1,ADORA1,ABHD6,IQSEC2,CACNB3,NRXN1,PPP1R9A,SLC6A1,GRIA4,ERBB4,CPLX2,STX1B,MYO5A,PTN,SHANK1,RAPGEF4,SPTBN2,GABRB2,MAP1A,SLC1A3,PPP3R1,PRRT2,PTPRD,CLSTN1,ADARB1,GLRB,SYT1,JPH3,RIMS4,SHANK3,HOMER1,JPH4,EXT1,GLS,OTOF,NPTN,LRRK2,…
GO:BP	anterograde trans-synaptic signaling	GO:0098916	7.75e-40	39.1106	856	1390	152	27543	LYNX1,MGLL,RPH3A,NRN1,GABRD,PLCB1,DGKZ,SIPA1L1,GIT1,GRM2,SNAP25,SYT2,GRIN2A,PRKCB,CALM1,PLCB4,RIMS3,SLC24A2,ATP2B2,DLG4,ARC,ADCY1,CUX2,ZMYND8,PPP3CA,DLGAP3,DLGAP1,CHRDL1,GABRA1,ADORA1,ABHD6,IQSEC2,CACNB3,NRXN1,PPP1R9A,SLC6A1,GRIA4,ERBB4,CPLX2,STX1B,MYO5A,PTN,SHANK1,RAPGEF4,SPTBN2,GABRB2,MAP1A,SLC1A3,PPP3R1,PRRT2,PTPRD,CLSTN1,ADARB1,GLRB,SYT1,JPH3,RIMS4,SHANK3,HOMER1,JPH4,EXT1,GLS,OTOF,NPTN,LRRK2,…
GO:BP	regulation of developmental process	GO:0050793	2.1e-39	38.6782	2652	1390	300	27543	MGLL,TTL,PLCB1,FBXW7,SIPA1L1,LZTS3,ZFPM1,ASAP1,CCDC3,SMAD3,MAPK6,CPNE9,ZFP703,SYT2,NBL1,PRKCB,OLFM1,WNT4,WNT9A,PHOSPHO1,LINGO1,TRPC6,DLG4,JDP2,PACSIN1,FGF9,BRINP1,ARC,CUX2,GPM6B,ZMYND8,PLXND1,PPP3CA,LRTM2,ATP2B1,S1PR1,RIMS1,RBFOX1,MEDAG,RTN4R,INF2,SYNDIG1,RORA,MAN2A1,NRXN1,PPP1R9A,FSTL4,SORT1,MAF,DKKL1,ERBB4,DAB2IP,BMPER,MYLK3,PTN,SHANK1,VASN,RAPGEF4,BRINP2,SPIRE1,CNTN4,GPR37L1,MPL,TFRC,SSBP3,RAS…
GO:BP	cell morphogenesis involved in neuron differentiation	GO:0048667	2.92e-39	38.5353	623	1390	127	27543	MGLL,TTL,NRN1,SIPA1L1,LZTS3,WHRN,OLFM1,ATP2B2,TRPC6,DLG4,ARC,ADCY1,NTN5,CUX2,PLXND1,PPP3CA,LRTM2,KIF5C,RTN4R,LMTK2,PIP5K1C,PHACTR1,PPP1R9A,FSTL4,CDK5R2,PTN,CNTNAP1,SHANK1,CNTN4,MAP1A,FARP1,SLC1A3,RTN4RL1,PTPRD,ADARB1,EFNA5,PREX2,SHANK3,FBXO31,SCN1B,EXT1,NPTN,LRRK2,CTNND2,BRSK2,APBB1,NRCAM,PTK2,CTNNA2,GRIN1,SRCIN1,HECW1,STXBP1,FZD3,LRRC4C,PTPRZ1,ZFP365,SYNGAP1,TBC1D24,BAIAP2,ROBO3,DAB1,FLRT2,EGR2,…
GO:BP	modulation of chemical synaptic transmission	GO:0050804	5.45e-39	38.2632	645	1390	129	27543	MGLL,NRN1,PLCB1,DGKZ,SIPA1L1,GIT1,GRM2,SNAP25,GRIN2A,PRKCB,CALM1,PLCB4,RIMS3,SLC24A2,ATP2B2,DLG4,ARC,ADCY1,CUX2,ZMYND8,PPP3CA,DLGAP3,DLGAP1,CHRDL1,ADORA1,ABHD6,IQSEC2,CACNB3,NRXN1,PPP1R9A,SLC6A1,GRIA4,ERBB4,CPLX2,STX1B,MYO5A,PTN,SHANK1,RAPGEF4,MAP1A,SLC1A3,PPP3R1,PRRT2,PTPRD,CLSTN1,SYT1,JPH3,RIMS4,SHANK3,HOMER1,JPH4,NPTN,LRRK2,SYT12,PPP1R9B,ERC2,FAM107A,PRKAR1B,PRKCZ,PTK2,GRIN1,STXBP1,CACNG2,CACN…
GO:BP	regulation of trans-synaptic signaling	GO:0099177	6.5e-39	38.1872	646	1390	129	27543	MGLL,NRN1,PLCB1,DGKZ,SIPA1L1,GIT1,GRM2,SNAP25,GRIN2A,PRKCB,CALM1,PLCB4,RIMS3,SLC24A2,ATP2B2,DLG4,ARC,ADCY1,CUX2,ZMYND8,PPP3CA,DLGAP3,DLGAP1,CHRDL1,ADORA1,ABHD6,IQSEC2,CACNB3,NRXN1,PPP1R9A,SLC6A1,GRIA4,ERBB4,CPLX2,STX1B,MYO5A,PTN,SHANK1,RAPGEF4,MAP1A,SLC1A3,PPP3R1,PRRT2,PTPRD,CLSTN1,SYT1,JPH3,RIMS4,SHANK3,HOMER1,JPH4,NPTN,LRRK2,SYT12,PPP1R9B,ERC2,FAM107A,PRKAR1B,PRKCZ,PTK2,GRIN1,STXBP1,CACNG2,CACN…
GO:BP	regulation of transport	GO:0051049	9.79e-38	37.0092	1872	1390	237	27543	RPH3A,NRN1,PLCB1,FBXW7,GIT1,NOS1AP,PTPN3,GRM2,TNNC1,SNAP25,GRIN2A,KCNC1,PRKCB,KCNA2,CALM1,PLCB4,RIMS3,KCNA1,CACNA1I,ATP2B2,TRPC6,DLG4,PACSIN1,ARC,WFS1,ADCY1,ITPR1,ATP1A1,GPM6B,PPP3CA,BOK,BSN,ATP2B1,SCN8A,ZDHHC8,APLN,ADORA1,PIP5K1C,EXPH5,CACNB3,RGS7,NRXN1,NETO2,PPP1R9A,SLC6A1,CDK16,ALOX12B,ERBB4,CDK5R2,CPLX2,STX1B,KCNIP3,AKT2,MYO5A,IQSEC1,OLFR78,SHANK1,PACSIN3,RAPGEF4,CACNA2D3,MYRIP,CRY2,JSRP1,PPP…
GO:BP	cell migration	GO:0016477	1.09e-37	36.9637	1505	1390	207	27543	SCRT1,PLCB1,FBXW7,SMAD3,ZFP703,NBL1,WNT4,PAK1,CHST2,FGF9,ARC,ZMYND8,PLXND1,PPP3CA,S1PR1,ADORA1,ACAP3,ASTN2,TYRO3,ABHD6,PHACTR1,ERBB4,CDK5R2,FUT9,DAB2IP,AKT2,BMPER,MYO5A,IQSEC1,OLFR78,PTN,ATRNL1,RAPGEF4,DUSP1,DMTN,ADARB1,MEGF9,FBXO31,MYO18A,EXT1,ACTN4,ZMIZ1,LRRK2,PPP1R9B,FAM107A,ADAM9,STRIP2,WWC1,SIRPA,LMO4,NET1,PRKCZ,RASGEF1A,PLEKHO1,MERTK,APBB1,CXCL14,PTPRT,PTK2,DOCK4,FERMT2,SUN1,CTNNA2,GRIN1,SR…
GO:BP	cellular process	GO:0009987	2.05e-37	36.6887	21177	1390	1256	27543	LYNX1,MAPK4,MAP6D1,SCRT1,ARPP19,MGLL,ENDOU,TTL,ADRA1D,RPH3A,NRN1,ADCY9,GABRD,PLCB1,STARD8,FBXW7,ANO3,CAMKK2,DGKZ,SIPA1L1,NFIC,GIT1,LZTS3,WHRN,ZFPM1,ASAP1,LGI2,CCDC3,LY6E,NOS1AP,PPME1,SMAD3,RGS20,PTPN3,CUX1,KCTD1,GRM2,MAPK6,GFRA2,KCTD17,CPNE9,TNNC1,SNAP25,EVC2,TTC7B,ZNFX1,ZFP703,SYT2,ATF6,SORBS2,GRIN2A,DIO2,KCNC1,NLK,NBL1,ETNK2,CD6,PDP1,ARHGEF17,TUBA4A,ARPP21,PRKCB,KCNA2,CALM1,OLFM1,HKDC1,PLCB4,SL…
GO:BP	phosphorus metabolic process	GO:0006793	5.53e-37	36.2576	2797	1390	305	27543	MAPK4,ARPP19,ADCY9,PLCB1,FBXW7,CAMKK2,DGKZ,GIT1,SMAD3,PTPN3,MAPK6,GFRA2,TTC7B,NLK,ETNK2,CD6,PDP1,PRKCB,CALM1,HKDC1,SLC39A10,HEG1,PHOSPHO1,DUSP7,ATP2B2,TRPC6,DLG4,PAK1,FGF9,CAMK4,ADCY1,ATP1A1,MAST3,CCNG1,PPP3CA,NUDT3,SENP2,DUSP14,APLN,GUCY2G,ADORA1,LMTK2,TYRO3,PIP5K1C,RORA,ABHD6,PPP2R2C,OBSCN,PHACTR1,NRXN1,PPP1R9A,CDK16,ERBB4,CDK5R2,LPCAT4,PIP5K1B,DAB2IP,AKT2,BMPER,INPPL1,MYLK3,LPGAT1,CRY2,INCENP,…
GO:BP	response to stimulus	GO:0050896	1.6e-36	35.7947	10393	1390	761	27543	LYNX1,MAPK4,MGLL,ENDOU,ADRA1D,RPH3A,ADCY9,GABRD,PLCB1,STARD8,FBXW7,ANO3,CAMKK2,DGKZ,SIPA1L1,GIT1,WHRN,CCDC3,LY6E,SMAD3,RGS20,GRM2,MAPK6,GFRA2,TNNC1,EVC2,ZNFX1,ZFP703,ATF6,SORBS2,GRIN2A,DIO2,KCNC1,NLK,NBL1,CD6,ARPP21,PRKCB,CALM1,OLFM1,PLCB4,SLC39A10,WNT4,STARD10,SLC13A5,HEG1,WNT9A,KCNA1,SLC24A2,RASD1,DUSP7,LINGO1,ATP2B2,TRPC6,SEC14L1,BAP1,DLG4,CAMTA2,SCUBE1,PACSIN1,PITPNM2,PAK1,CHST2,HERC6,FGF9,BR…
GO:BP	phosphate-containing compound metabolic process	GO:0006796	2.57e-36	35.5907	2777	1390	302	27543	MAPK4,ARPP19,ADCY9,PLCB1,FBXW7,CAMKK2,DGKZ,GIT1,SMAD3,PTPN3,MAPK6,GFRA2,TTC7B,NLK,ETNK2,CD6,PDP1,PRKCB,CALM1,HKDC1,SLC39A10,HEG1,PHOSPHO1,DUSP7,ATP2B2,TRPC6,DLG4,PAK1,FGF9,CAMK4,ADCY1,ATP1A1,MAST3,CCNG1,PPP3CA,NUDT3,SENP2,DUSP14,APLN,GUCY2G,ADORA1,LMTK2,TYRO3,PIP5K1C,RORA,ABHD6,PPP2R2C,OBSCN,PHACTR1,NRXN1,PPP1R9A,CDK16,ERBB4,CDK5R2,LPCAT4,PIP5K1B,DAB2IP,AKT2,BMPER,INPPL1,MYLK3,LPGAT1,CRY2,INCENP,…
GO:BP	cell motility	GO:0048870	2.78e-34	33.5556	1697	1390	216	27543	SCRT1,PLCB1,FBXW7,SMAD3,ZFP703,NBL1,WNT4,CACNA1I,PAK1,CHST2,FGF9,ARC,ZMYND8,PLXND1,PPP3CA,S1PR1,ADORA1,ACAP3,ASTN2,TYRO3,ABHD6,PHACTR1,ERBB4,CDK5R2,FUT9,DAB2IP,AKT2,BMPER,MYO5A,IQSEC1,OLFR78,PTN,ATRNL1,RAPGEF4,DUSP1,ASH1L,DMTN,CADM4,ADARB1,MEGF9,FBXO31,MYO18A,EXT1,ACTN4,ZMIZ1,LRRK2,PPP1R9B,FAM107A,ADAM9,STRIP2,WWC1,SIRPA,LMO4,NET1,PRKCZ,RASGEF1A,PLEKHO1,MERTK,APBB1,CXCL14,PTPRT,PTK2,DOCK4,FERMT2,…
GO:BP	localization of cell	GO:0051674	2.78e-34	33.5556	1697	1390	216	27543	SCRT1,PLCB1,FBXW7,SMAD3,ZFP703,NBL1,WNT4,CACNA1I,PAK1,CHST2,FGF9,ARC,ZMYND8,PLXND1,PPP3CA,S1PR1,ADORA1,ACAP3,ASTN2,TYRO3,ABHD6,PHACTR1,ERBB4,CDK5R2,FUT9,DAB2IP,AKT2,BMPER,MYO5A,IQSEC1,OLFR78,PTN,ATRNL1,RAPGEF4,DUSP1,ASH1L,DMTN,CADM4,ADARB1,MEGF9,FBXO31,MYO18A,EXT1,ACTN4,ZMIZ1,LRRK2,PPP1R9B,FAM107A,ADAM9,STRIP2,WWC1,SIRPA,LMO4,NET1,PRKCZ,RASGEF1A,PLEKHO1,MERTK,APBB1,CXCL14,PTPRT,PTK2,DOCK4,FERMT2,…
GO:BP	cellular response to stimulus	GO:0051716	3.95e-34	33.4032	8778	1390	666	27543	LYNX1,MAPK4,MGLL,ADRA1D,RPH3A,ADCY9,GABRD,PLCB1,STARD8,FBXW7,CAMKK2,DGKZ,SIPA1L1,GIT1,CCDC3,LY6E,SMAD3,RGS20,GRM2,MAPK6,GFRA2,EVC2,ZFP703,ATF6,SORBS2,GRIN2A,KCNC1,NLK,NBL1,CD6,ARPP21,PRKCB,CALM1,OLFM1,PLCB4,SLC39A10,WNT4,STARD10,SLC13A5,HEG1,WNT9A,KCNA1,SLC24A2,RASD1,DUSP7,LINGO1,TRPC6,SEC14L1,DLG4,SCUBE1,PACSIN1,PITPNM2,PAK1,FGF9,BRINP1,ARC,WFS1,ADCY1,ITPR1,WSB2,CUX2,ATP1A1,PLCXD2,ZMYND8,MAST3,P…
GO:BP	behavior	GO:0007610	1.19e-33	32.9251	741	1390	131	27543	PLCB1,GIT1,GRM2,SNAP25,GRIN2A,KCNA2,SLC24A2,ATP2B2,DLG4,BRINP1,CAMK4,ARC,WFS1,ADCY1,CUX2,ZDHHC8,APLN,ADORA1,NRXN1,SLC6A1,GCNT4,KCNIP3,MYO5A,STRBP,PTN,SHANK1,SPIRE1,SPTBN2,MAP1A,SLC1A3,ADARB1,SPECC1,GLRB,JPH3,PREX2,SHANK3,HOMER1,JPH4,EXT1,GLS,NPTN,LRRK2,SLC1A2,PPP1R9B,SLC12A5,PRKAR1B,PRKCZ,GRIN1,HDAC4,GABRG2,CACNB4,ATP1B2,SORCS3,APBA2,NEGR1,PTPRZ1,PDE5A,LGI4,SYNGAP1,KCNJ10,CNR1,HOMER2,PGR,NR1D1,DA…
GO:BP	negative regulation of signaling	GO:0023057	1.87e-33	32.729	1375	1390	188	27543	MGLL,DGKZ,GIT1,CCDC3,RGS20,NLK,NBL1,PRKCB,WNT4,HEG1,SLC24A2,DUSP7,SEC14L1,FGF9,ARC,WFS1,ITPR1,PPP3CA,BOK,CHRDL1,APLN,ADORA1,TYRO3,RORA,ABHD6,RGS7,PPP1R9A,FSTL4,SLC6A1,DKKL1,DAB2IP,BMPER,MYO5A,INPPL1,VASN,RAPGEF4,CRY2,GPR37L1,DUSP1,RGS7BP,ASH1L,RASSF2,HEY1,HSPA1B,OTUD3,CCDC88C,PTPRD,CADM4,VGLL4,SHANK3,LRRK2,TLE6,DACT3,WWC1,KCTD6,SIRPA,PRKCZ,PIP4K2C,PTPRT,ARR3,STXBP1,FGFRL1,IL12A,HTRA1,SORCS3,SLC35…
GO:BP	negative regulation of cell communication	GO:0010648	4.13e-33	32.3844	1371	1390	187	27543	MGLL,DGKZ,GIT1,CCDC3,RGS20,NLK,NBL1,PRKCB,WNT4,HEG1,SLC24A2,DUSP7,SEC14L1,FGF9,ARC,WFS1,ITPR1,PPP3CA,BOK,CHRDL1,APLN,ADORA1,TYRO3,RORA,ABHD6,RGS7,PPP1R9A,FSTL4,SLC6A1,DKKL1,DAB2IP,BMPER,MYO5A,INPPL1,VASN,RAPGEF4,CRY2,GPR37L1,DUSP1,RGS7BP,ASH1L,RASSF2,HEY1,HSPA1B,OTUD3,CCDC88C,PTPRD,CADM4,VGLL4,SHANK3,LRRK2,TLE6,DACT3,WWC1,KCTD6,SIRPA,PRKCZ,PIP4K2C,PTPRT,ARR3,STXBP1,FGFRL1,IL12A,HTRA1,SORCS3,SLC35…
GO:BP	phosphorylation	GO:0016310	1.61e-32	31.7923	1936	1390	231	27543	MAPK4,FBXW7,CAMKK2,DGKZ,GIT1,MAPK6,GFRA2,NLK,ETNK2,CD6,PRKCB,CALM1,HKDC1,HEG1,DUSP7,TRPC6,DLG4,PAK1,FGF9,CAMK4,MAST3,CCNG1,SENP2,APLN,GUCY2G,ADORA1,LMTK2,TYRO3,PIP5K1C,OBSCN,PHACTR1,NRXN1,PPP1R9A,CDK16,ERBB4,CDK5R2,PIP5K1B,DAB2IP,AKT2,BMPER,INPPL1,MYLK3,INCENP,DUSP1,CDK19,BTBD10,MPP3,TFRC,RASSF2,FOXK1,CCDC88C,DMTN,CADM4,ADARB1,EFNA5,RASGRP1,RAMP3,NPTN,LRRK2,MAPK10,CDK2AP1,PPP1R9B,FOXK2,FN3K,ADAM9…
GO:BP	protein modification process	GO:0036211	1.51e-31	30.8209	3707	1390	354	27543	MAPK4,MAP6D1,ARPP19,TTL,FBXW7,CAMKK2,NOS1AP,PPME1,PTPN3,MAPK6,GFRA2,NLK,CD6,PDP1,PRKCB,CALM1,SLC39A10,HEG1,DUSP7,TTLL11,TRPC6,BAP1,DLG4,JDP2,PAK1,HERC6,FGF9,DPY19L1,CAMK4,WFS1,WSB2,MAST3,TRIM37,CCNG1,PPP3CA,SENP2,ST3GAL5,ZDHHC8,DUSP14,GUCY2G,ADORA1,GALNT18,LMTK2,TYRO3,PPP2R2C,MAN2A1,OBSCN,NRXN1,PPP1R9A,CDK16,ALOX12B,GCNT4,ERBB4,CDK5R2,FUT9,DAB2IP,AKT2,BMPER,INPPL1,MYLK3,MAN1A2,CRY2,INCENP,DUSP1,C…
GO:BP	cellular protein modification process	GO:0006464	1.51e-31	30.8209	3707	1390	354	27543	MAPK4,MAP6D1,ARPP19,TTL,FBXW7,CAMKK2,NOS1AP,PPME1,PTPN3,MAPK6,GFRA2,NLK,CD6,PDP1,PRKCB,CALM1,SLC39A10,HEG1,DUSP7,TTLL11,TRPC6,BAP1,DLG4,JDP2,PAK1,HERC6,FGF9,DPY19L1,CAMK4,WFS1,WSB2,MAST3,TRIM37,CCNG1,PPP3CA,SENP2,ST3GAL5,ZDHHC8,DUSP14,GUCY2G,ADORA1,GALNT18,LMTK2,TYRO3,PPP2R2C,MAN2A1,OBSCN,NRXN1,PPP1R9A,CDK16,ALOX12B,GCNT4,ERBB4,CDK5R2,FUT9,DAB2IP,AKT2,BMPER,INPPL1,MYLK3,MAN1A2,CRY2,INCENP,DUSP1,C…
GO:BP	cell adhesion	GO:0007155	1.84e-31	30.7358	1422	1390	188	27543	PLCB1,SMAD3,ZFP703,CD6,WNT4,DLG4,CHST2,GPM6B,PLXND1,CYFIP2,PPP3CA,S1PR1,FMN1,ASTN2,TYRO3,PIP5K1C,NRXN1,LRRC32,FUT9,INPPL1,PTN,CNTNAP1,ATRNL1,TTYH1,CNTN4,DUSP1,MPL,TFRC,PTPRD,NTM,DMTN,CLSTN1,CADM4,EFNA5,RASGRP1,MEGF9,EXT1,ZBTB16,TESC,ACTN4,ZMIZ1,NPTN,MEGF11,CTNND2,FAM107A,ADAM9,SIRPA,PRKCZ,MERTK,PCDHAC1,PTPRT,NRCAM,PTK2,FERMT2,CTNNA2,SRCIN1,STXBP1,FCHO1,FGFRL1,IL12A,IGDCC4,ATP1B2,LRRC4C,NEGR1,PTPR…
GO:BP	postsynapse organization	GO:0099173	3.04e-31	30.517	209	1390	66	27543	RPH3A,DGKZ,SIPA1L1,GIT1,LZTS3,NOS1AP,SORBS2,GRIN2A,DLG4,ARC,CUX2,ZMYND8,DLGAP1,CHRDL1,ARHGEF9,NRXN1,PPP1R9A,PTN,CNTNAP1,SHANK1,RAPGEF4,SPTBN2,FARP1,PTPRD,ABHD17A,GLRB,CNKSR2,SHANK3,HOMER1,LRRK2,CTNND2,NRCAM,GRIN1,SRCIN1,ZFP365,SYNGAP1,BAIAP2,NDRG2,RELN,CDK5R1,LRP4,ZDHHC2,NTNG2,MAGI2,NEFH,MYH10,CDKL5,MPP2,DLG1,ACTN1,NUMB,FZD9,VHL,NTRK3,STAU2,IGF1R,ARHGAP33,SHANK2,TANC1,INA,IL1RAPL1,PTPRS,PTPRF,NPT…
GO:BP	signal transduction	GO:0007165	3.12e-31	30.5058	6896	1390	550	27543	LYNX1,MAPK4,MGLL,ADRA1D,RPH3A,ADCY9,GABRD,PLCB1,STARD8,FBXW7,CAMKK2,DGKZ,SIPA1L1,GIT1,CCDC3,LY6E,SMAD3,RGS20,GRM2,MAPK6,GFRA2,EVC2,ZFP703,ATF6,SORBS2,GRIN2A,NLK,NBL1,CD6,PRKCB,CALM1,OLFM1,PLCB4,SLC39A10,WNT4,STARD10,HEG1,WNT9A,KCNA1,SLC24A2,RASD1,DUSP7,LINGO1,SEC14L1,DLG4,SCUBE1,PACSIN1,PITPNM2,PAK1,FGF9,ARC,WFS1,ADCY1,ITPR1,WSB2,CUX2,PLCXD2,ZMYND8,MAST3,PLXND1,CYFIP2,CCNG1,PPP3CA,BOK,BSN,DLGAP3,…
GO:BP	cell surface receptor signaling pathway	GO:0007166	3.61e-31	30.4424	2812	1390	292	27543	PLCB1,FBXW7,DGKZ,SIPA1L1,GIT1,CCDC3,SMAD3,GRM2,GFRA2,EVC2,ZFP703,SORBS2,GRIN2A,NLK,NBL1,CD6,PRKCB,SLC39A10,WNT4,WNT9A,DLG4,SCUBE1,PAK1,FGF9,CUX2,ZMYND8,PLXND1,CYFIP2,PPP3CA,BOK,CHRDL1,SENP2,IGFBP4,APLN,ACKR1,GUCY2G,ADORA1,RTN4R,LMTK2,TYRO3,RORA,LYPD6,IL11RA1,CACNB3,LIFR,NRXN1,PPP1R9A,LRRC32,FSTL4,GRIA4,SORT1,DKKL1,ERBB4,DAB2IP,STX1B,AKT2,BMPER,INPPL1,PTN,SHANK1,VASN,GPR37L1,MPL,DAGLB,RASSF2,HEY1,…
GO:BP	regulation of cell projection organization	GO:0031344	2.02e-30	29.6942	732	1390	125	27543	SIPA1L1,LZTS3,KCTD17,SNAP25,TRPC6,DLG4,PACSIN1,ARC,ITPR1,CUX2,ZMYND8,PLXND1,PPP3CA,RAP1GAP2,ACAP3,RTN4R,NRXN1,TBC1D30,PPP1R9A,FSTL4,FUT9,SYNE1,DAB2IP,STX1B,INPPL1,PTN,RAPGEF4,RTN4RL1,PTPRD,NTM,DMTN,EFNA5,SHANK3,FBXO31,HOMER1,SCN1B,ATMIN,NPTN,LRRK2,ACSL6,BRSK2,APBB1,NRCAM,PTK2,CTNNA2,GRIN1,SRCIN1,HECW1,HDAC4,ATP1B2,LRRC4C,NEGR1,PTPRZ1,ZFP365,SYNGAP1,TBC1D24,BAIAP2,CNR1,APC,DAB1,SERPINI1,CXCL12,DIP…
GO:BP	regulation of plasma membrane bounded cell projection organization	GO:0120035	3.8e-30	29.4205	716	1390	123	27543	SIPA1L1,LZTS3,KCTD17,SNAP25,TRPC6,PACSIN1,ARC,ITPR1,CUX2,ZMYND8,PLXND1,PPP3CA,RAP1GAP2,ACAP3,RTN4R,NRXN1,TBC1D30,PPP1R9A,FSTL4,FUT9,SYNE1,DAB2IP,STX1B,INPPL1,PTN,RAPGEF4,RTN4RL1,PTPRD,NTM,DMTN,EFNA5,SHANK3,FBXO31,HOMER1,SCN1B,ATMIN,NPTN,LRRK2,ACSL6,BRSK2,APBB1,NRCAM,PTK2,CTNNA2,GRIN1,SRCIN1,HECW1,HDAC4,ATP1B2,LRRC4C,NEGR1,PTPRZ1,ZFP365,SYNGAP1,TBC1D24,BAIAP2,CNR1,APC,DAB1,SERPINI1,CXCL12,DIP2B,RE…
GO:BP	homeostatic process	GO:0042592	1.17e-29	28.9332	1732	1390	209	27543	PLCB1,FBXW7,GIT1,WHRN,ZFPM1,GRM2,KCTD17,DIO2,PRKCB,CALM1,HKDC1,SLC39A10,KCNA1,SLC24A2,ATP2B2,TRPC6,BAP1,WFS1,ITPR1,ATP1A1,PPP3CA,BOK,ATP2B1,S1PR1,APLN,ADORA1,SLC25A23,TYRO3,RORA,ABHD6,SLC30A4,CDK16,ALOX12B,GCNT4,ERBB4,MYO5A,ZBTB18,CYP39A1,CRY2,MAP1A,SLC1A3,MPL,JSRP1,MYH7B,TFRC,RASSF2,HSPA1B,FOXK1,DMTN,CLSTN1,EFNA5,E030003E18RIK,JPH3,SHANK3,SLC25A37,RYR1,HOMER1,EXT1,TESC,GLS,NPTN,LRRK2,LCAT,FOXK2,…
GO:BP	cellular component organization	GO:0016043	1.37e-29	28.8619	7353	1390	571	27543	MAP6D1,MGLL,TTL,RPH3A,NRN1,PLCB1,STARD8,FBXW7,ANO3,DGKZ,SIPA1L1,GIT1,LZTS3,WHRN,ASAP1,LGI2,NOS1AP,SMAD3,KCTD1,MAPK6,KCTD17,CPNE9,SNAP25,ZNFX1,ZFP703,SYT2,SORBS2,GRIN2A,KCNC1,NBL1,ARHGEF17,TUBA4A,PRKCB,KCNA2,CALM1,OLFM1,WNT4,RIMS3,HEG1,KCNA1,SLC24A2,TTLL11,LINGO1,ATP2B2,TRPC6,BAP1,DLG4,MEI1,PACSIN1,PITPNM2,PAK1,ARC,ADCY1,ITPR1,NTN5,CUX2,GPM6B,ZMYND8,MAST3,PLXND1,TRIM37,CYFIP2,PPP3CA,LRTM2,BOK,BSN,…
GO:BP	tissue development	GO:0009888	2.94e-29	28.5323	2046	1390	232	27543	PLCB1,WHRN,ZFPM1,LY6E,SMAD3,TNNC1,ZFP703,SORBS2,OLFM1,WNT4,HEG1,WNT9A,PHOSPHO1,ATP2B2,PAK1,FGF9,ARC,NTN5,MYBPC3,GPM6B,PLXND1,PPP3CA,SENP2,ATP2B1,S1PR1,RBFOX1,FMN1,ASTN2,EXPH5,IL11RA1,GCNT4,MAF,RILPL1,ERBB4,DAB2IP,BMPER,MYO5A,ZBTB18,MYLK3,PTN,CNTNAP1,ATRNL1,VASN,DUSP1,LUZP1,SSBP3,ASH1L,PPP3R1,CCDC88C,ADARB1,VGLL4,E030003E18RIK,MEGF9,SHANK3,RYR1,HOMER1,EXT1,ZBTB16,FN3K,ADAM9,DACT3,PLAGL1,HES3,BRSK2…
GO:BP	ion transport	GO:0006811	3.22e-29	28.4919	1591	1390	197	27543	RPH3A,GABRD,PLCB1,ANO3,NOS1AP,PTPN3,GRM2,SNAP25,GRIN2A,KCNC1,PRKCB,KCNA2,CALM1,PLCB4,SLC39A10,STARD10,SLC13A5,KCNA1,SLC24A2,CACNA1I,ATP2B2,TRPC6,SEC14L1,LASP1,DLG4,LRRC8B,ARC,WFS1,ITPR1,ATP1A1,GPM6B,PPP3CA,SFXN5,ATP2B1,SCN8A,GABRA1,ADORA1,SLC25A23,LMTK2,CACNB3,SLC30A4,RGS7,NRXN1,NETO2,SLC6A1,GRIA4,SLC16A6,KCNIP3,AKT2,MYO5A,SHANK1,PACSIN3,GABRB2,TTYH1,CACNA2D3,CRY2,SLC1A3,JSRP1,TFRC,KCNJ6,SLC23A3,…
GO:BP	regulation of membrane potential	GO:0042391	9.69e-29	28.0136	465	1390	95	27543	GABRD,NOS1AP,PTPN3,GRIN2A,KCNC1,KCNA2,CALM1,RIMS3,KCNA1,CACNA1I,DLG4,CUX2,ATP1A1,ZMYND8,PPP3CA,BOK,GABRA1,ADORA1,CACNB3,RGS7,NRXN1,PPP1R9A,GRIA4,STX1B,AKT2,PTN,CNTNAP1,SHANK1,RAPGEF4,GABRB2,RGS7BP,GLRB,RIMS4,SHANK3,SCN1B,LRRK2,PRKAR1B,PRKCZ,NRCAM,GRIN1,KCNQ3,CACNG2,SLC4A11,GABRG2,CACNB4,ATP1B2,GRIK5,TBC1D24,KCNJ10,BAIAP2,CNR1,ADRB1,PCLO,RELN,IGSF9B,HCN1,KCNK12,SRC,KCNJ11,PRKCE,CRTC1,NTRK2,CACNA1A…
GO:BP	positive regulation of developmental process	GO:0051094	2.6e-28	27.5858	1427	1390	182	27543	PLCB1,CCDC3,SMAD3,MAPK6,CPNE9,ZFP703,SYT2,NBL1,PRKCB,OLFM1,WNT4,WNT9A,TRPC6,DLG4,PACSIN1,FGF9,BRINP1,CUX2,GPM6B,ZMYND8,PLXND1,PPP3CA,LRTM2,ATP2B1,RIMS1,MEDAG,SYNDIG1,MAN2A1,NRXN1,PPP1R9A,DKKL1,ERBB4,DAB2IP,BMPER,MYLK3,PTN,SHANK1,BRINP2,SPIRE1,MPL,TFRC,SSBP3,CDS1,HSPA1B,PTPRD,DMTN,CLSTN1,EFNA5,SYT1,RASGRP1,SHANK3,FBXO31,ZBTB16,TESC,ZMIZ1,NPTN,TLE6,ADAM9,PRKCZ,PTK2,FERMT2,ADRA2C,FZD3,IL12A,MAPK9,PT…
GO:BP	cell junction assembly	GO:0034329	2.98e-28	27.5262	435	1390	91	27543	SIPA1L1,LGI2,SMAD3,ZFP703,WNT4,HEG1,CUX2,GPM6B,PLXND1,LRTM2,BSN,GABRA1,FMN1,SYNDIG1,ARHGEF9,NRXN1,PPP1R9A,ERBB4,CNTNAP1,SPTBN2,GABRB2,FARP1,PTPRD,DMTN,CLSTN1,EFNA5,SHANK3,ACTN4,NPTN,FAM107A,PTK2,FERMT2,CTNNA2,GRIN1,GABRG2,NEGR1,PRKCA,FLRT2,PLEC,PCLO,NRXN3,RELN,SRC,PKP1,NTRK2,SH3BP1,CDH12,LRP4,NTNG2,DUSP3,CACNA1A,CORO2B,MAGI2,ITGAV,DLG1,ACTN1,CDH22,PTPRJ,ACVRL1,NUMB,SDK1,SRF,SLITRK1,CDH11,NTRK3,ST…
GO:BP	macromolecule modification	GO:0043412	8.36e-28	27.0777	3898	1390	356	27543	MAPK4,MAP6D1,ARPP19,TTL,FBXW7,CAMKK2,NOS1AP,PPME1,PTPN3,MAPK6,GFRA2,NLK,CD6,PDP1,PRKCB,CALM1,SLC39A10,HEG1,DUSP7,TTLL11,TRPC6,BAP1,DLG4,JDP2,PAK1,HERC6,FGF9,DPY19L1,CAMK4,WFS1,WSB2,MAST3,TRIM37,CCNG1,PPP3CA,SENP2,ST3GAL5,ZDHHC8,DUSP14,GUCY2G,ADORA1,GALNT18,LMTK2,TYRO3,PPP2R2C,MAN2A1,OBSCN,NRXN1,PPP1R9A,CDK16,ALOX12B,GCNT4,ERBB4,CDK5R2,FUT9,DAB2IP,AKT2,BMPER,INPPL1,MYLK3,MAN1A2,CRY2,INCENP,DUSP1,C…
GO:BP	axon development	GO:0061564	1.04e-27	26.9835	516	1390	99	27543	MGLL,TTL,NRN1,SIPA1L1,OLFM1,ADCY1,NTN5,PLXND1,LRTM2,KIF5C,RTN4R,LMTK2,PIP5K1C,FSTL4,CDK5R2,PTN,CNTNAP1,CNTN4,MAP1A,RTN4RL1,ADARB1,EFNA5,SCN1B,EXT1,NPTN,BRSK2,APBB1,NRCAM,PTK2,CTNNA2,GRIN1,STXBP1,FZD3,LRRC4C,PTPRZ1,SYNGAP1,TBC1D24,ROBO3,CNR1,DAB1,FLRT2,EGR2,CXCL12,DIP2B,RELN,CDK5R1,TBR1,RNF165,TRAK1,NREP,PLXNA4,NTRK2,MARK2,LRP4,NTNG2,CACNA1A,EPHA8,NEFH,MYH10,BRSK1,CDKL5,LAMA3,FOXP1,NUMB,DCLK1,SRF,…
GO:BP	protein phosphorylation	GO:0006468	2.07e-27	26.6841	1641	1390	197	27543	MAPK4,FBXW7,CAMKK2,MAPK6,GFRA2,NLK,CD6,PRKCB,CALM1,HEG1,DUSP7,TRPC6,DLG4,PAK1,FGF9,CAMK4,MAST3,CCNG1,SENP2,GUCY2G,ADORA1,LMTK2,TYRO3,OBSCN,NRXN1,PPP1R9A,CDK16,ERBB4,CDK5R2,DAB2IP,AKT2,BMPER,INPPL1,MYLK3,INCENP,DUSP1,CDK19,TFRC,RASSF2,CCDC88C,DMTN,CADM4,ADARB1,EFNA5,RASGRP1,RAMP3,NPTN,LRRK2,MAPK10,CDK2AP1,PPP1R9B,ADAM9,BRSK2,SIRPA,HUNK,PRKAR1B,PRKCZ,MERTK,PTPRT,PTK2,FERMT2,ARR3,ADRA2C,CSNK1G2,SRCI…
GO:BP	cellular localization	GO:0051641	2.61e-27	26.5841	2840	1390	284	27543	MAP6D1,TTL,RPH3A,NRN1,FBXW7,GIT1,TNNC1,SNAP25,TTC7B,SYT2,SORBS2,GRIN2A,PRKCB,CALM1,RIMS3,KCNA1,DLG4,MEI1,PACSIN1,FGF9,ARC,ADCY1,ITPR1,GPM6B,ZMYND8,PPP3CA,BOK,BSN,CHRDL1,RIMS1,KIF5C,ADORA1,SLC25A23,LMTK2,ASTN2,SYNDIG1,PIP5K1C,EXPH5,IQSEC2,ARHGEF9,AP1S1,CACNB3,SLC30A4,NRXN1,DPP10,PPP1R9A,RAB6B,MYO5C,SLC6A1,LYST,CDK16,SORT1,RILPL1,ERBB4,SYNE1,CPLX2,STX1B,KCNIP3,SPCS3,AKT2,MYO5A,IQSEC1,PTN,CNTNAP1,RA…
GO:BP	head development	GO:0060322	4.93e-27	26.3073	813	1390	127	27543	PLCB1,GIT1,WHRN,KCNC1,WNT4,KCNA1,ATP2B2,ADCY1,CCNG1,PPP3CA,BOK,ATP2B1,S1PR1,RTN4R,TYRO3,RORA,IL11RA1,RGS7,PHACTR1,NRXN1,ERBB4,CDK5R2,DAB2IP,ZBTB18,SPTBN2,CNTN4,GPR37L1,SSBP3,RTN4RL1,EFNA5,SYT1,SHANK3,EXT1,ZMIZ1,LRRK2,CDK2AP1,SLC1A2,PPP1R9B,HES3,SUN1,CTNNA2,GRIN1,FZD3,ATP1B2,NEGR1,ZFP365,CKB,BAIAP2,ANKRD11,FOXO3,DAB1,TACC1,EGR2,CXCL12,RELN,NAPA,SRC,CDK5R1,TBR1,RBPJ,PLXNA4,CSRNP1,NTRK2,CELSR2,SLC6A…
GO:BP	cellular component organization or biogenesis	GO:0071840	5.39e-27	26.2685	7543	1390	573	27543	MAP6D1,MGLL,TTL,RPH3A,NRN1,PLCB1,STARD8,FBXW7,ANO3,DGKZ,SIPA1L1,GIT1,LZTS3,WHRN,ASAP1,LGI2,NOS1AP,SMAD3,KCTD1,MAPK6,KCTD17,CPNE9,SNAP25,ZNFX1,ZFP703,SYT2,SORBS2,GRIN2A,KCNC1,NBL1,ARHGEF17,TUBA4A,PRKCB,KCNA2,CALM1,OLFM1,WNT4,RIMS3,HEG1,KCNA1,SLC24A2,TTLL11,LINGO1,ATP2B2,TRPC6,BAP1,DLG4,MEI1,PACSIN1,PITPNM2,PAK1,ARC,ADCY1,ITPR1,NTN5,CUX2,GPM6B,ZMYND8,MAST3,PLXND1,TRIM37,CYFIP2,PPP3CA,LRTM2,BOK,BSN,…
GO:BP	regulation of neuron projection development	GO:0010975	7.24e-27	26.1405	528	1390	99	27543	SIPA1L1,LZTS3,SNAP25,TRPC6,PACSIN1,ARC,ITPR1,CUX2,PLXND1,PPP3CA,RAP1GAP2,ACAP3,RTN4R,PPP1R9A,FSTL4,FUT9,DAB2IP,STX1B,INPPL1,PTN,RAPGEF4,RTN4RL1,PTPRD,NTM,EFNA5,SHANK3,FBXO31,SCN1B,NPTN,LRRK2,ACSL6,BRSK2,APBB1,NRCAM,PTK2,CTNNA2,GRIN1,SRCIN1,HECW1,ATP1B2,LRRC4C,NEGR1,PTPRZ1,ZFP365,SYNGAP1,TBC1D24,BAIAP2,CNR1,DAB1,SERPINI1,CXCL12,DIP2B,RELN,NEU1,CDK5R1,TBR1,TRAK1,CRTC1,FAT3,PLXNA4,NTRK2,MARK2,LRP4,H…
GO:BP	axonogenesis	GO:0007409	1.04e-26	25.981	464	1390	92	27543	MGLL,TTL,NRN1,SIPA1L1,OLFM1,ADCY1,NTN5,PLXND1,LRTM2,KIF5C,RTN4R,LMTK2,PIP5K1C,FSTL4,CDK5R2,CNTNAP1,CNTN4,MAP1A,RTN4RL1,ADARB1,EFNA5,SCN1B,EXT1,NPTN,BRSK2,APBB1,NRCAM,PTK2,CTNNA2,GRIN1,STXBP1,FZD3,LRRC4C,PTPRZ1,SYNGAP1,ROBO3,DAB1,FLRT2,EGR2,CXCL12,DIP2B,RELN,CDK5R1,TBR1,RNF165,TRAK1,PLXNA4,NTRK2,MARK2,LRP4,NTNG2,CACNA1A,EPHA8,NEFH,MYH10,BRSK1,CDKL5,LAMA3,FOXP1,NUMB,DCLK1,SRF,GLI3,SLITRK1,CDH11,ARH…
GO:BP	cation transport	GO:0006812	2.91e-26	25.5355	1185	1390	158	27543	RPH3A,PLCB1,NOS1AP,PTPN3,GRM2,SNAP25,GRIN2A,KCNC1,PRKCB,KCNA2,CALM1,PLCB4,SLC39A10,SLC13A5,KCNA1,SLC24A2,CACNA1I,ATP2B2,TRPC6,SEC14L1,DLG4,ARC,WFS1,ITPR1,ATP1A1,GPM6B,PPP3CA,ATP2B1,SCN8A,ADORA1,SLC25A23,LMTK2,CACNB3,SLC30A4,RGS7,NRXN1,NETO2,SLC6A1,KCNIP3,AKT2,MYO5A,SHANK1,PACSIN3,CACNA2D3,SLC1A3,JSRP1,TFRC,KCNJ6,KCNH1,SYT1,RAMP3,JPH3,SHANK3,SLC25A37,RYR1,HOMER1,JPH4,SCN1B,TESC,SYT12,SLC1A2,SLC12A…
GO:BP	regulation of ion transport	GO:0043269	4.31e-26	25.3652	723	1390	117	27543	RPH3A,PLCB1,NOS1AP,PTPN3,GRM2,GRIN2A,KCNC1,PRKCB,KCNA2,CALM1,PLCB4,KCNA1,CACNA1I,ATP2B2,TRPC6,DLG4,ARC,WFS1,ITPR1,ATP1A1,GPM6B,ATP2B1,SCN8A,ADORA1,CACNB3,RGS7,NRXN1,NETO2,SLC6A1,KCNIP3,AKT2,MYO5A,SHANK1,PACSIN3,CACNA2D3,CRY2,JSRP1,KCNJ6,KCNH1,SYT1,RAMP3,JPH3,SHANK3,HOMER1,JPH4,SCN1B,TESC,SYT12,GRIN1,KCNQ3,HECW1,STXBP1,KCNJ9,CACNG2,CACNB4,ATP1B2,MAPK9,KCNJ12,KCNJ10,CNR1,HOMER2,ADRB1,CXCL12,RELN,HC…
GO:BP	regulation of phosphate metabolic process	GO:0019220	9.28e-26	25.0324	1432	1390	177	27543	ARPP19,FBXW7,CAMKK2,DGKZ,GIT1,SMAD3,GFRA2,CD6,CALM1,SLC39A10,HEG1,DUSP7,TRPC6,DLG4,PAK1,FGF9,CCNG1,SENP2,APLN,ADORA1,LMTK2,TYRO3,PHACTR1,NRXN1,PPP1R9A,ERBB4,CDK5R2,DAB2IP,AKT2,BMPER,INPPL1,CRY2,INCENP,DUSP1,BTBD10,TFRC,RASSF2,CCDC88C,HSD11B1,DMTN,CADM4,ADARB1,EFNA5,RASGRP1,RAMP3,NPTN,LRRK2,CDK2AP1,PPP1R9B,ADAM9,SIRPA,LMO4,PRKAR1B,PRKCZ,PIP4K2C,MERTK,PTPRT,PTK2,FERMT2,ARR3,ADRA2C,SRCIN1,HDAC4,FGFR…
GO:BP	regulation of phosphorus metabolic process	GO:0051174	1.01e-25	24.9956	1433	1390	177	27543	ARPP19,FBXW7,CAMKK2,DGKZ,GIT1,SMAD3,GFRA2,CD6,CALM1,SLC39A10,HEG1,DUSP7,TRPC6,DLG4,PAK1,FGF9,CCNG1,SENP2,APLN,ADORA1,LMTK2,TYRO3,PHACTR1,NRXN1,PPP1R9A,ERBB4,CDK5R2,DAB2IP,AKT2,BMPER,INPPL1,CRY2,INCENP,DUSP1,BTBD10,TFRC,RASSF2,CCDC88C,HSD11B1,DMTN,CADM4,ADARB1,EFNA5,RASGRP1,RAMP3,NPTN,LRRK2,CDK2AP1,PPP1R9B,ADAM9,SIRPA,LMO4,PRKAR1B,PRKCZ,PIP4K2C,MERTK,PTPRT,PTK2,FERMT2,ARR3,ADRA2C,SRCIN1,HDAC4,FGFR…
GO:BP	regulation of catalytic activity	GO:0050790	1.46e-25	24.8354	2278	1390	240	27543	ARPP19,PLCB1,STARD8,FBXW7,CAMKK2,DGKZ,SIPA1L1,GIT1,ASAP1,SMAD3,RGS20,PDP1,ARHGEF17,CALM1,SLC39A10,WNT4,HEG1,WNT9A,DUSP7,DLG4,PAK1,ADCY1,PLXND1,CYFIP2,CCNG1,BOK,BSN,RAP1GAP2,S1PR1,DOCK3,ADORA1,ACAP3,RTN4R,LMTK2,TYRO3,IQSEC2,ARHGEF9,PPP2R2C,ARHGAP10,RGS7,OBSCN,PHACTR1,NRXN1,TBC1D30,PPP1R9A,ARAP2,RASGEF1B,SORT1,ERBB4,CDK5R2,RAPGEFL1,DAB2IP,AKT2,MYO5A,IQSEC1,INPPL1,PTN,RAPGEF4,PPP1R37,ADAP1,CRY2,FARP…
GO:BP	regulation of phosphorylation	GO:0042325	3.19e-25	24.4962	1284	1390	164	27543	FBXW7,CAMKK2,DGKZ,GIT1,GFRA2,CD6,HEG1,DUSP7,TRPC6,DLG4,PAK1,FGF9,CCNG1,SENP2,APLN,ADORA1,LMTK2,TYRO3,PHACTR1,NRXN1,PPP1R9A,ERBB4,CDK5R2,DAB2IP,AKT2,BMPER,INPPL1,INCENP,DUSP1,BTBD10,TFRC,RASSF2,CCDC88C,DMTN,CADM4,ADARB1,EFNA5,RASGRP1,RAMP3,NPTN,LRRK2,CDK2AP1,PPP1R9B,ADAM9,SIRPA,LMO4,PRKAR1B,PRKCZ,PIP4K2C,MERTK,PTPRT,PTK2,FERMT2,ARR3,ADRA2C,SRCIN1,HDAC4,FGFR3,IL12A,HBEGF,MAPK9,PTPRB,PTPRZ1,PDE5A,ZF…
GO:BP	cellular response to endogenous stimulus	GO:0071495	3.73e-25	24.4287	1474	1390	179	27543	PLCB1,GIT1,SMAD3,ZFP703,GRIN2A,NLK,NBL1,PRKCB,WNT4,PAK1,FGF9,ITPR1,ATP1A1,CHRDL1,ATP2B1,GABRA1,APLN,NRXN1,LRRC32,SORT1,ERBB4,DAB2IP,AKT2,BMPER,MYO5A,INPPL1,OLFR78,VASN,GABRB2,CRY2,SLC1A3,NR3C1,PAQR8,DMTN,EFNA5,RAMP3,RYR1,EXT1,ZMIZ1,NPTN,LRRK2,SLC1A2,PPP1R9B,FAM107A,ADAM9,FBXO32,KLF16,ACAP2,PRKCZ,PIP4K2C,PTK2,FERMT2,CPEB2,FGFRL1,HDAC4,GABRG2,FGFR3,RAMP1,HTRA1,ESRRG,BAIAP2,FOXO3,PGR,NR1D1,PIN1,APC,…
GO:BP	positive regulation of cell communication	GO:0010647	4.08e-25	24.3897	1895	1390	211	27543	PLCB1,FBXW7,SMAD3,SNAP25,ATF6,GRIN2A,PRKCB,SLC39A10,STARD10,RIMS3,WNT9A,SLC24A2,DLG4,SCUBE1,PAK1,FGF9,ARC,ADCY1,CUX2,CYFIP2,BOK,IGFBP4,APLN,ADORA1,RTN4R,LYPD6,CACNB3,NRXN1,PPP1R9A,ALOX12B,GRIA4,ERBB4,DAB2IP,STX1B,AKT2,BMPER,OLFR78,PTN,SHANK1,RAPGEF4,MYRIP,SLC1A3,GPR37L1,TFRC,RASSF2,HSPA1B,DMTN,CLSTN1,SYT1,ADRA1B,RASGRP1,RAMP3,SHANK3,ACTN4,ZMIZ1,NPTN,LRRK2,SYT12,FAM107A,ADAM9,TSPAN5,WWC1,PRKAR1B,N…
GO:BP	response to endogenous stimulus	GO:0009719	4.2e-25	24.3769	1775	1390	202	27543	PLCB1,GIT1,SMAD3,ZFP703,GRIN2A,KCNC1,NLK,NBL1,PRKCB,CALM1,WNT4,PAK1,FGF9,ITPR1,ATP1A1,CHRDL1,ATP2B1,GABRA1,APLN,NRXN1,LRRC32,SORT1,ERBB4,DAB2IP,AKT2,BMPER,MYO5A,INPPL1,OLFR78,VASN,GABRB2,CRY2,SLC1A3,NR3C1,PAQR8,DMTN,EFNA5,RAMP3,RYR1,EXT1,ZMIZ1,NPTN,LRRK2,LCAT,SLC1A2,PPP1R9B,FAM107A,ADAM9,FBXO32,KLF16,ACAP2,PRKCZ,PIP4K2C,PTK2,FERMT2,CTNNA2,CPEB2,FGFRL1,HDAC4,GABRG2,FGFR3,RAMP1,HTRA1,ESRRG,BAIAP2,F…
GO:BP	negative regulation of signal transduction	GO:0009968	6.84e-25	24.165	1231	1390	159	27543	DGKZ,GIT1,CCDC3,RGS20,NLK,NBL1,PRKCB,WNT4,HEG1,DUSP7,SEC14L1,FGF9,WFS1,ITPR1,BOK,CHRDL1,APLN,TYRO3,RORA,RGS7,FSTL4,DKKL1,DAB2IP,BMPER,INPPL1,VASN,CRY2,GPR37L1,DUSP1,RGS7BP,ASH1L,RASSF2,HEY1,HSPA1B,OTUD3,CCDC88C,PTPRD,CADM4,VGLL4,LRRK2,TLE6,DACT3,WWC1,KCTD6,SIRPA,PRKCZ,PIP4K2C,PTPRT,ARR3,FGFRL1,IL12A,HTRA1,SLC35C1,SCAI,SYNGAP1,FOXO3,HOMER2,NR1D1,PIN1,CIT,APC,DAB1,NDRG2,TLE1,CXCL12,FRZB,AGAP2,ARRB1…
GO:BP	positive regulation of molecular function	GO:0044093	6.99e-25	24.1556	1533	1390	183	27543	PLCB1,FBXW7,CAMKK2,DGKZ,SIPA1L1,ASAP1,SMAD3,KCNC1,PDP1,PRKCB,CALM1,SLC39A10,WNT4,KCNA1,MYL4,TRPC6,DLG4,PAK1,ARC,ADCY1,PLXND1,TRIM37,CYFIP2,PPP3CA,BOK,RAP1GAP2,S1PR1,ADORA1,RTN4R,LMTK2,TYRO3,CACNB3,RGS7,NRXN1,TBC1D30,PPP1R9A,ARAP2,RASGEF1B,ERBB4,CDK5R2,RAPGEFL1,DAB2IP,AKT2,MYO5A,IQSEC1,RAPGEF4,ADAP1,INCENP,TFRC,RASSF2,TBC1D22A,HSPA1B,RASGRP1,SHANK3,TESC,LRRK2,PARM1,ADAM9,LMO4,NET1,PRKCZ,RASGEF1A,M…
GO:BP	metal ion transport	GO:0030001	1.04e-24	23.9839	904	1390	131	27543	PLCB1,NOS1AP,PTPN3,SNAP25,GRIN2A,KCNC1,PRKCB,KCNA2,CALM1,PLCB4,SLC39A10,SLC13A5,KCNA1,SLC24A2,CACNA1I,ATP2B2,TRPC6,WFS1,ITPR1,ATP1A1,PPP3CA,ATP2B1,SCN8A,ADORA1,SLC25A23,LMTK2,CACNB3,SLC30A4,RGS7,NETO2,SLC6A1,KCNIP3,AKT2,MYO5A,PACSIN3,CACNA2D3,SLC1A3,JSRP1,TFRC,KCNJ6,KCNH1,RAMP3,JPH3,SLC25A37,RYR1,HOMER1,JPH4,SCN1B,TESC,SLC12A5,GRIN1,KCNQ3,HECW1,KCNJ9,CACNG2,SLC4A11,CACNB4,RAMP1,ATP1B2,KCNJ12,SLC9…
GO:BP	dendrite development	GO:0016358	1.09e-24	23.9618	295	1390	70	27543	SIPA1L1,GIT1,LZTS3,ASAP1,MAPK6,TRPC6,DLG4,PACSIN1,ARC,NTN5,CUX2,ZMYND8,PPP3CA,PHACTR1,PPP1R9A,FSTL4,DAB2IP,IQSEC1,PTN,SHANK1,RAPGEF4,SPIRE1,MAP1A,FARP1,PTPRD,PREX2,SHANK3,FBXO31,LRRK2,CTNND2,PPP1R9B,SLC12A5,CTNNA2,GRIN1,SRCIN1,HECW1,PTPRZ1,ZFP365,SYNGAP1,TBC1D24,BAIAP2,DAB1,RELN,CDK5R1,TRAK1,CRTC1,FAT3,NTRK2,CELSR2,LRP4,HECW2,CACNA1A,AKAP5,CDKL5,NUMB,SDK1,DCLK1,STAU2,ARHGAP33,FMR1,MEF2C,PTPRS,PTP…
GO:BP	brain development	GO:0007420	1.62e-24	23.7904	763	1390	118	27543	PLCB1,GIT1,WHRN,KCNC1,WNT4,KCNA1,ATP2B2,ADCY1,CCNG1,PPP3CA,BOK,ATP2B1,S1PR1,RTN4R,TYRO3,RORA,RGS7,PHACTR1,NRXN1,ERBB4,CDK5R2,DAB2IP,ZBTB18,SPTBN2,CNTN4,GPR37L1,SSBP3,RTN4RL1,EFNA5,SYT1,SHANK3,EXT1,ZMIZ1,LRRK2,SLC1A2,PPP1R9B,HES3,SUN1,CTNNA2,GRIN1,FZD3,ATP1B2,NEGR1,ZFP365,CKB,BAIAP2,FOXO3,DAB1,TACC1,EGR2,CXCL12,RELN,NAPA,SRC,CDK5R1,TBR1,RBPJ,PLXNA4,NTRK2,CELSR2,SLC6A17,KDM7A,CACNA1A,NEFH,MYH10,MAS…
GO:BP	positive regulation of signaling	GO:0023056	1.62e-24	23.7899	1901	1390	210	27543	PLCB1,FBXW7,SMAD3,SNAP25,ATF6,GRIN2A,PRKCB,SLC39A10,STARD10,RIMS3,WNT9A,SLC24A2,DLG4,SCUBE1,PAK1,FGF9,ARC,ADCY1,CUX2,CYFIP2,BOK,IGFBP4,APLN,ADORA1,RTN4R,LYPD6,CACNB3,NRXN1,PPP1R9A,ALOX12B,GRIA4,ERBB4,DAB2IP,STX1B,AKT2,BMPER,OLFR78,PTN,SHANK1,RAPGEF4,MYRIP,SLC1A3,GPR37L1,TFRC,RASSF2,HSPA1B,DMTN,CLSTN1,SYT1,ADRA1B,RASGRP1,RAMP3,SHANK3,ACTN4,ZMIZ1,NPTN,LRRK2,SYT12,FAM107A,ADAM9,TSPAN5,WWC1,PRKAR1B,N…
GO:BP	cellular response to chemical stimulus	GO:0070887	2.63e-24	23.5802	3457	1390	317	27543	PLCB1,FBXW7,GIT1,CCDC3,LY6E,SMAD3,ZFP703,ATF6,SORBS2,GRIN2A,KCNC1,NLK,NBL1,CD6,PRKCB,WNT4,SLC13A5,KCNA1,TRPC6,DLG4,PAK1,FGF9,BRINP1,WFS1,ADCY1,ITPR1,CUX2,ATP1A1,CYFIP2,PPP3CA,BOK,CHRDL1,ATP2B1,S1PR1,GABRA1,APLN,ACKR1,SLC25A23,LMTK2,RORA,IL11RA1,LIFR,NRXN1,PPP1R9A,LRRC32,CDK16,SORT1,ERBB4,SMARCD1,DAB2IP,AKT2,BMPER,MYO5A,INPPL1,MYLK3,OLFR78,PTN,VASN,BRINP2,GABRB2,CRY2,SLC1A3,NR3C1,GPR37L1,DUSP1,MPL…
GO:BP	regulation of cellular component movement	GO:0051270	2.85e-24	23.5458	1077	1390	145	27543	SCRT1,PLCB1,FBXW7,SMAD3,TNNC1,ZFP703,NBL1,WNT4,PAK1,CHST2,FGF9,ATP1A1,ZMYND8,PLXND1,PPP3CA,S1PR1,ADORA1,ABHD6,PHACTR1,ERBB4,FUT9,DAB2IP,AKT2,BMPER,MYO5A,IQSEC1,PTN,RAPGEF4,DUSP1,DMTN,CADM4,ADARB1,FBXO31,ACTN4,FAM107A,ADAM9,LMO4,CXCL14,PTPRT,PTK2,DOCK4,FERMT2,CTNNA2,GRIN1,SRCIN1,SCRT2,HDAC4,IL12A,NAV3,ATP1B2,HBEGF,PTPRZ1,SCAI,TBC1D24,PRKCA,TPM1,FOXO3,SWAP70,PGR,PIN1,APC,FLRT2,ADRB1,SMPD3,CXCL12,RE…
GO:BP	central nervous system development	GO:0007417	3.28e-24	23.4845	1031	1390	141	27543	PLCB1,GIT1,WHRN,KCNC1,WNT4,KCNA1,LINGO1,ATP2B2,ADCY1,CCNG1,PPP3CA,BOK,ATP2B1,S1PR1,RTN4R,TYRO3,RORA,RGS7,PHACTR1,NRXN1,ERBB4,CDK5R2,DAB2IP,ZBTB18,PTN,CNTNAP1,SPTBN2,CNTN4,GPR37L1,SSBP3,RTN4RL1,ADARB1,EFNA5,SYT1,SHANK3,SCN1B,EXT1,ZBTB16,ZMIZ1,LRRK2,SLC1A2,PPP1R9B,HES3,LMO4,NRCAM,PTK2,SUN1,CTNNA2,GRIN1,FZD3,ATP1B2,NEGR1,PTPRZ1,ZFP365,CKB,KCNJ10,BAIAP2,FOXO3,NR1D1,DAB1,TACC1,EGR2,CXCL12,RELN,NAPA,SR…
GO:BP	regulation of anatomical structure morphogenesis	GO:0022603	3.35e-24	23.4756	961	1390	135	27543	SIPA1L1,LZTS3,CPNE9,SYT2,PRKCB,WNT4,TRPC6,DLG4,ARC,CUX2,PLXND1,PPP3CA,RIMS1,RTN4R,INF2,PPP1R9A,FSTL4,DAB2IP,BMPER,PTN,SPIRE1,MPL,TFRC,PTPRD,DMTN,EFNA5,SYT1,SHANK3,FBXO31,ACTN4,LRRK2,STRIP2,BRSK2,PLEKHO1,PTK2,FERMT2,GRIN1,SRCIN1,HECW1,FZD3,MAPK9,LRRC4C,PTPRZ1,SYNGAP1,TBC1D24,PRKCA,PLEKHA4,BAIAP2,TPM1,DAB1,CXCL12,DIP2B,RELN,SRC,CDK5R1,RBPJ,TRAK1,PLXNA4,NTRK2,MARK2,LRP4,UNC13A,HECW2,NTNG2,CACNA1A,SC…
GO:BP	actin filament-based process	GO:0030029	3.69e-24	23.4331	803	1390	121	27543	STARD8,SIPA1L1,NOS1AP,SMAD3,TNNC1,SORBS2,ARHGEF17,WNT4,PACSIN1,PAK1,ATP1A1,GPM6B,CYFIP2,S1PR1,ADORA1,FMN1,INF2,PHACTR1,PPP1R9A,MYO5C,MYO5A,IQSEC1,INPPL1,MYLK3,SHANK1,SPIRE1,SPTBN2,MYRIP,FARP1,CCDC88C,DMTN,EFNA5,SPECC1,SHANK3,MYO18A,SPTB,SCN1B,ARHGEF10L,ACTN4,PPP1R9B,FAM107A,TLE6,ACAP2,MYH2,BRSK2,SIRPA,FERMT2,CTNNA2,MYO1E,MICAL2,BAIAP2,TPM1,SWAP70,CIT,ADRB1,PLEC,ACTA1,ATP2A1,AGAP2,ARRB1,SRC,PHACTR…
GO:BP	ion transmembrane transport	GO:0034220	4.21e-24	23.3762	1105	1390	147	27543	RPH3A,GABRD,PLCB1,ANO3,NOS1AP,PTPN3,SNAP25,GRIN2A,KCNC1,KCNA2,CALM1,SLC39A10,SLC13A5,KCNA1,SLC24A2,CACNA1I,ATP2B2,TRPC6,LASP1,DLG4,LRRC8B,ARC,ITPR1,ATP1A1,SFXN5,ATP2B1,SCN8A,GABRA1,SLC25A23,CACNB3,SLC30A4,RGS7,NRXN1,NETO2,SLC6A1,GRIA4,KCNIP3,MYO5A,SHANK1,GABRB2,CACNA2D3,SLC1A3,JSRP1,TFRC,KCNJ6,SLC23A3,KCNH1,GLRB,RAMP3,JPH3,SHANK3,SLC25A18,SLC25A37,RYR1,HOMER1,SCN1B,TESC,SLC1A2,SLC12A5,GRIN1,KCNQ3…
GO:BP	regulation of multicellular organismal development	GO:2000026	5.31e-24	23.2752	1494	1390	178	27543	PLCB1,FBXW7,ZFPM1,SMAD3,PRKCB,WNT4,WNT9A,PHOSPHO1,LINGO1,TRPC6,FGF9,BRINP1,CUX2,GPM6B,PLXND1,PPP3CA,LRTM2,ATP2B1,S1PR1,RTN4R,SYNDIG1,MAN2A1,NRXN1,FSTL4,MAF,ERBB4,DAB2IP,BMPER,PTN,GPR37L1,MPL,RASSF2,HSPA1B,PTPRD,CLSTN1,VGLL4,EFNA5,RASGRP1,SHANK3,FBXO31,ZBTB16,BHLHE40,TESC,ZMIZ1,NPTN,TLE6,HES3,PRKCZ,PTK2,FZD3,IL12A,PTPRZ1,LGI4,ZFP365,SYNGAP1,TBC1D24,PRKCA,BAIAP2,FOXO3,NR1D1,PIN1,DAB1,FLRT2,ADRB1,ZD…
GO:BP	anatomical structure formation involved in morphogenesis	GO:0048646	6.28e-24	23.202	1182	1390	153	27543	FBXW7,WHRN,ZFPM1,SMAD3,PRKCB,OLFM1,WNT4,ATP2B2,FGF9,PLXND1,CCNG1,S1PR1,APLN,FMN1,RORA,NRXN1,CDK5R2,FJX1,DAB2IP,BMPER,MYLK3,PTN,CNTNAP1,PTGFRN,DUSP1,MPL,LUZP1,SSBP3,HEY1,PPP3R1,E030003E18RIK,SHANK3,EXT1,MEGF11,ADAM9,LMO4,PLEKHO1,NRCAM,PTK2,FZD3,IL12A,RAMP1,HTRA1,HBEGF,MIB1,PTPRB,PRKCA,TPM1,TCOF1,HS6ST1,ESRRB,PLEC,EGR2,SMPD3,CXCL12,NRXN3,ACTA1,RELN,SHROOM3,LAMB3,CDK5R1,TBR1,RBPJ,FAT3,DMP1,IL4RA,EPA…
GO:BP	organonitrogen compound metabolic process	GO:1901564	2.32e-23	22.6344	6512	1390	501	27543	MAPK4,MAP6D1,ARPP19,ENDOU,TTL,ADCY9,PLCB1,FBXW7,CAMKK2,GIT1,LY6E,NOS1AP,PPME1,SMAD3,PTPN3,MAPK6,GFRA2,KCTD17,GRIN2A,DIO2,NLK,CD6,PDP1,PRKCB,CALM1,HKDC1,SLC39A10,HEG1,WNT9A,DUSP7,TTLL11,ATP2B2,TRPC6,BAP1,DLG4,JDP2,PAK1,HERC6,FGF9,DPY19L1,CAMK4,WFS1,ADCY1,WSB2,MAST3,TRIM37,CYFIP2,CCNG1,PPP3CA,MAN1C1,BOK,NUDT3,DLGAP1,SENP2,ST3GAL5,ZDHHC8,DUSP14,GUCY2G,ADORA1,DPP8,GALNT18,LMTK2,AGMAT,TYRO3,FBXL16,ROR…
GO:BP	regulation of cell differentiation	GO:0045595	4.15e-23	22.3823	1718	1390	193	27543	PLCB1,FBXW7,ZFPM1,CCDC3,SMAD3,ZFP703,NBL1,OLFM1,WNT4,WNT9A,LINGO1,TRPC6,JDP2,FGF9,BRINP1,CUX2,PLXND1,PPP3CA,RBFOX1,MEDAG,RTN4R,RORA,MAN2A1,FSTL4,SORT1,MAF,DKKL1,DAB2IP,MYLK3,PTN,VASN,BRINP2,CNTN4,GPR37L1,MPL,RASSF2,CDS1,HSPA1B,PTPRD,DMTN,EFNA5,RASGRP1,SHANK3,FBXO31,ZBTB16,BHLHE40,TESC,ACTN4,ZMIZ1,NPTN,LRRK2,TLE6,DACT3,HES3,PRKCZ,APBB1,CXCL14,PTK2,FERMT2,ADRA2C,FZD3,HDAC4,SLC4A11,IL12A,MAPK9,MIB1,…
GO:BP	regulation of cell migration	GO:0030334	6.66e-23	22.1764	932	1390	130	27543	SCRT1,PLCB1,FBXW7,SMAD3,ZFP703,NBL1,WNT4,PAK1,CHST2,FGF9,ZMYND8,PLXND1,PPP3CA,S1PR1,ADORA1,ABHD6,PHACTR1,ERBB4,FUT9,DAB2IP,AKT2,BMPER,MYO5A,IQSEC1,PTN,RAPGEF4,DUSP1,DMTN,ADARB1,FBXO31,ACTN4,FAM107A,ADAM9,LMO4,CXCL14,PTPRT,PTK2,DOCK4,FERMT2,CTNNA2,GRIN1,SRCIN1,SCRT2,HDAC4,IL12A,NAV3,ATP1B2,HBEGF,PTPRZ1,SCAI,TBC1D24,PRKCA,TPM1,FOXO3,SWAP70,PGR,APC,FLRT2,SMPD3,CXCL12,RELN,PPARD,SRC,TRIB1,PRKCE,PLXNA…
GO:BP	chemical homeostasis	GO:0048878	7.14e-23	22.1466	1099	1390	144	27543	GRM2,KCTD17,PRKCB,CALM1,HKDC1,SLC39A10,KCNA1,SLC24A2,ATP2B2,TRPC6,WFS1,ITPR1,ATP1A1,PPP3CA,BOK,ATP2B1,ADORA1,SLC25A23,RORA,SLC30A4,CDK16,ALOX12B,ERBB4,MYO5A,CYP39A1,CRY2,SLC1A3,JSRP1,MYH7B,TFRC,FOXK1,CLSTN1,EFNA5,JPH3,SLC25A37,RYR1,HOMER1,EXT1,TESC,GLS,NPTN,LRRK2,LCAT,FOXK2,SLC12A5,BRSK2,PTK2,GRIN1,TTC39B,TTC7,SLC4A11,ATP1B2,GRIK5,ANK1,SLC9A5,CKB,KCNJ10,CNR1,FOXO3,HOMER2,TMEM97,NR1D1,ADRB1,PLEC,P…
GO:BP	positive regulation of metabolic process	GO:0009893	1.2e-22	21.9198	3908	1390	341	27543	ARPP19,PLCB1,FBXW7,CAMKK2,DGKZ,NFIC,GIT1,WHRN,ZFPM1,CCDC3,NOS1AP,SMAD3,ATF6,DIO2,CD6,PRKCB,CALM1,OLFM1,SLC39A10,WNT4,HEG1,TRPC6,DLG4,JDP2,CAMTA2,PAK1,FGF9,CAMK4,WFS1,CUX2,TRIM37,CYFIP2,PPP3CA,BOK,SENP2,S1PR1,APLN,ADORA1,LMTK2,ZMIZ2,TYRO3,RORA,ABHD6,NRXN1,PPP1R9A,LRRC32,ALOX12B,MAF,ERBB4,CDK5R2,SMARCD1,DAB2IP,AKT2,ZBTB18,LPGAT1,PACSIN3,SPIRE1,INCENP,MPL,DAGLB,BTBD10,RNF144A,TFRC,SSBP3,ASH1L,RASSF2…
GO:BP	animal organ morphogenesis	GO:0009887	1.39e-22	21.8565	1082	1390	142	27543	NFIC,WHRN,ZFPM1,LY6E,SMAD3,TNNC1,NBL1,OLFM1,WNT4,HEG1,WNT9A,PHOSPHO1,ATP2B2,FGF9,ITPR1,NTN5,MYBPC3,PLXND1,PPP3CA,S1PR1,FMN1,MAN2A1,GCNT4,ERBB4,FJX1,MYO5A,INPPL1,PTN,ATRNL1,ASH1L,DLX1AS,ADARB1,E030003E18RIK,MEGF9,SHANK3,RYR1,EXT1,ZMIZ1,LRRK2,MEGF11,PRKAR1B,CTNNA2,FZD3,FGFRL1,HTRA1,MIB1,MICAL2,PLEKHA4,ANKRD11,TPM1,FOXO3,PGR,FLRT2,DIO3,SMPD3,ACTA1,HCN1,FRZB,LAMB3,SRC,TBR1,OLFM3,RBPJ,FAT3,DHRS3,CSRNP…
GO:BP	cell surface receptor signaling pathway involved in cell-cell signaling	GO:1905114	1.47e-22	21.8318	555	1390	95	27543	SMAD3,ZFP703,GRIN2A,NLK,WNT4,WNT9A,DLG4,FGF9,CUX2,ZMYND8,PPP3CA,SENP2,ADORA1,LYPD6,CACNB3,NRXN1,PPP1R9A,DKKL1,DAB2IP,STX1B,SHANK1,CCDC88C,VGLL4,GLRB,SHANK3,EXT1,LRRK2,CTNND2,TLE6,DACT3,PRKAR1B,PRKCZ,FERMT2,GRIN1,CSNK1G2,FZD3,GRIK5,TBC1D24,PLEKHA4,BAIAP2,FOXO3,PIN1,APC,ADRB1,NDRG2,TLE1,PCLO,RELN,IGSF9B,FRZB,SRC,RBPJ,FAM53B,CELSR2,LRP4,MAPK14,TMEM198,TBL1XR1,TRPM4,EGR1,WNT10A,MPP2,NKD1,IGSF11,PTK7,…
GO:BP	positive regulation of signal transduction	GO:0009967	1.5e-22	21.8247	1537	1390	178	27543	PLCB1,FBXW7,SMAD3,ATF6,GRIN2A,PRKCB,SLC39A10,STARD10,WNT9A,DLG4,SCUBE1,PAK1,FGF9,CUX2,CYFIP2,BOK,IGFBP4,ADORA1,RTN4R,LYPD6,CACNB3,NRXN1,ALOX12B,ERBB4,DAB2IP,STX1B,AKT2,BMPER,OLFR78,SHANK1,GPR37L1,TFRC,RASSF2,HSPA1B,DMTN,ADRA1B,RASGRP1,RAMP3,SHANK3,ACTN4,ZMIZ1,NPTN,LRRK2,ADAM9,TSPAN5,WWC1,PRKAR1B,NET1,PRKCZ,RASGEF1A,PTK2,FERMT2,GRIN1,ADRA2C,CSNK1G2,FGFR3,IL12A,HBEGF,MAPK9,PDE5A,TBC1D24,PRKCA,PLEKH…
GO:BP	regulation of metabolic process	GO:0019222	1.82e-22	21.7404	7320	1390	544	27543	SCRT1,ARPP19,PLCB1,FBXW7,CAMKK2,DGKZ,NFIC,GIT1,WHRN,ZFPM1,CCDC3,NOS1AP,SMAD3,PTPN3,CUX1,KCTD1,GFRA2,ZNFX1,ZFP703,ATF6,GRIN2A,DIO2,NLK,CD6,PRKCB,CALM1,OLFM1,SLC39A10,WNT4,HEG1,WNT9A,RASD1,DUSP7,TRPC6,BAP1,DLG4,JDP2,CAMTA2,PAK1,FGF9,CAMK4,WFS1,ADCY1,CUX2,ATP1A1,ZMYND8,TRIM37,CYFIP2,CCNG1,PPP3CA,BOK,DLGAP1,SENP2,ATP2B1,S1PR1,IGFBP4,RBFOX1,APLN,ADORA1,SLC25A23,LMTK2,ZMIZ2,TYRO3,RORA,ABHD6,PHACTR1,NRX…
GO:BP	regulation of primary metabolic process	GO:0080090	2.07e-22	21.6848	5971	1390	466	27543	SCRT1,ARPP19,PLCB1,FBXW7,CAMKK2,DGKZ,NFIC,GIT1,ZFPM1,CCDC3,NOS1AP,SMAD3,PTPN3,CUX1,KCTD1,GFRA2,ZFP703,ATF6,GRIN2A,NLK,CD6,PRKCB,CALM1,SLC39A10,WNT4,HEG1,WNT9A,RASD1,DUSP7,TRPC6,BAP1,DLG4,JDP2,CAMTA2,PAK1,FGF9,CAMK4,WFS1,ADCY1,CUX2,ATP1A1,ZMYND8,TRIM37,CYFIP2,CCNG1,PPP3CA,BOK,DLGAP1,SENP2,S1PR1,IGFBP4,RBFOX1,APLN,ADORA1,ZMIZ2,RORA,ABHD6,NRXN1,GOLM1,PPP1R9A,PKNOX2,CDK16,RBFOX3,MAF,DKKL1,ERBB4,CDK5R…
GO:BP	export from cell	GO:0140352	2.48e-22	21.6059	945	1390	130	27543	RPH3A,NRN1,GIT1,LY6E,GRM2,SNAP25,SYT2,DIO2,PRKCB,KCNA2,CALM1,RIMS3,CACNA1I,ADCY1,ATP1A1,PPP3CA,ATP2B1,RIMS1,APLN,ADORA1,TYRO3,PIP5K1C,EXPH5,NRXN1,PPP1R9A,CDK16,CDK5R2,CPLX2,STX1B,MYO5A,OLFR78,RAPGEF4,SPTBN2,MYRIP,CRY2,PRRT2,DMTN,EFNA5,SYT1,RASGRP1,RIMS4,MYO18A,OTOF,LRRK2,SYT12,ERC2,ADAM9,BRSK2,MERTK,APBB1,SRCIN1,STXBP1,IL12A,CACNB4,ATP1B2,GRIK5,MAPK9,APBA2,PPFIA3,SYTL1,RAB15,CNR1,NR1D1,RASL10B,AD…
GO:BP	regulation of system process	GO:0044057	5.26e-22	21.2789	627	1390	101	27543	MGLL,NOS1AP,SMAD3,TNNC1,GRIN2A,CALM1,KCNA1,MYL4,DLG4,CUX2,MYBPC3,ATP1A1,ZMYND8,PPP3CA,DLGAP3,DLGAP1,ATP2B1,APLN,ADORA1,CACNB3,NRXN1,STX1B,OLFR78,SHANK1,RAPGEF4,CRY2,ADRA1B,SHANK3,RYR1,HOMER1,SCN1B,GLS,LRRK2,FBXO32,PRKAR1B,PRKCZ,PTK2,DOCK4,GRIN1,ADRA2C,HDAC4,CACNG2,HBEGF,PDE5A,TBC1D24,KCNJ10,BAIAP2,TPM1,FOXO3,PIN1,ADRB1,ZDHHC21,EGR2,PCLO,RELN,IGSF9B,ATP2A1,SRC,PPARG,EPAS1,PTGS2,TMEM38A,ARHGAP42,CO…
GO:BP	negative regulation of response to stimulus	GO:0048585	5.82e-22	21.2352	1608	1390	182	27543	DGKZ,GIT1,CCDC3,SMAD3,RGS20,NLK,NBL1,PRKCB,WNT4,HEG1,DUSP7,SEC14L1,FGF9,WFS1,ITPR1,BOK,CHRDL1,APLN,ADORA1,RTN4R,TYRO3,RORA,CACNB3,RGS7,NRXN1,FSTL4,DKKL1,DAB2IP,BMPER,INPPL1,VASN,CRY2,GPR37L1,DUSP1,RGS7BP,ASH1L,RASSF2,HEY1,HSPA1B,OTUD3,RTN4RL1,UBQLN4,CCDC88C,PTPRD,CADM4,VGLL4,LRRK2,TLE6,DACT3,WWC1,KCTD6,SIRPA,PRKCZ,PIP4K2C,PTPRT,CTNNA2,ARR3,GRIN1,FGFRL1,IL12A,HTRA1,SLC35C1,SCAI,SYNGAP1,METRNL,FOXO…
GO:BP	secretion	GO:0046903	8.38e-22	21.0768	1053	1390	138	27543	RPH3A,NRN1,GIT1,LY6E,GRM2,SNAP25,SYT2,DIO2,PRKCB,KCNA2,CALM1,STARD10,RIMS3,CACNA1I,ATP2B2,ADCY1,PPP3CA,RIMS1,APLN,ADORA1,TYRO3,PIP5K1C,EXPH5,NRXN1,PPP1R9A,SLC6A1,CDK16,ALOX12B,ERBB4,CDK5R2,CPLX2,STX1B,MYO5A,OLFR78,RAPGEF4,SPTBN2,MYRIP,CRY2,PRRT2,DMTN,EFNA5,SYT1,RASGRP1,RIMS4,MYO18A,OTOF,LRRK2,SYT12,ERC2,ADAM9,BRSK2,MERTK,APBB1,SRCIN1,STXBP1,IL12A,CACNB4,GRIK5,MAPK9,APBA2,PPFIA3,SYTL1,RAB15,CNR1,N…
GO:BP	regulation of intracellular signal transduction	GO:1902531	1.12e-21	20.9519	1617	1390	182	27543	PLCB1,STARD8,FBXW7,DGKZ,SIPA1L1,GIT1,GRM2,PRKCB,CALM1,HEG1,DUSP7,SEC14L1,PAK1,FGF9,WFS1,ITPR1,BOK,RAP1GAP2,IGFBP4,ADORA1,RTN4R,RORA,IQSEC2,NRXN1,ARAP2,ALOX12B,ERBB4,DAB2IP,BMPER,IQSEC1,INPPL1,OLFR78,GPR37L1,DUSP1,MYH7B,TFRC,ASH1L,RASSF2,HSPA1B,OTUD3,CADM4,VGLL4,ADRA1B,RASGRP1,RAMP3,ACTN4,NPTN,LRRK2,ADAM9,WWC1,SIRPA,NET1,PRKCZ,RASGEF1A,PTK2,FERMT2,ADRA2C,FGFR3,GARNL3,HBEGF,MAPK9,PDE5A,SCAI,SYNGAP1…
GO:BP	regulation of cellular metabolic process	GO:0031323	1.18e-21	20.9295	6103	1390	471	27543	SCRT1,ARPP19,PLCB1,FBXW7,CAMKK2,DGKZ,NFIC,GIT1,ZFPM1,NOS1AP,SMAD3,PTPN3,CUX1,KCTD1,GFRA2,ZFP703,ATF6,NLK,CD6,PRKCB,CALM1,SLC39A10,WNT4,HEG1,WNT9A,RASD1,DUSP7,TRPC6,BAP1,DLG4,JDP2,CAMTA2,PAK1,FGF9,CAMK4,WFS1,ADCY1,CUX2,ATP1A1,ZMYND8,TRIM37,CYFIP2,CCNG1,PPP3CA,BOK,DLGAP1,SENP2,S1PR1,IGFBP4,RBFOX1,APLN,ADORA1,SLC25A23,LMTK2,ZMIZ2,TYRO3,RORA,PHACTR1,NRXN1,PPP1R9A,PKNOX2,CDK16,RBFOX3,MAF,DKKL1,ERBB4,C…
GO:BP	cation transmembrane transport	GO:0098655	1.39e-21	20.8561	892	1390	124	27543	RPH3A,PLCB1,NOS1AP,PTPN3,SNAP25,GRIN2A,KCNC1,KCNA2,CALM1,SLC39A10,KCNA1,SLC24A2,CACNA1I,ATP2B2,TRPC6,DLG4,ARC,ITPR1,ATP1A1,ATP2B1,SCN8A,SLC25A23,CACNB3,SLC30A4,RGS7,NRXN1,NETO2,SLC6A1,KCNIP3,MYO5A,SHANK1,CACNA2D3,SLC1A3,JSRP1,TFRC,KCNJ6,KCNH1,RAMP3,JPH3,SHANK3,SLC25A37,RYR1,HOMER1,SCN1B,TESC,SLC1A2,SLC12A5,GRIN1,KCNQ3,HECW1,KCNJ9,CACNG2,SLC4A11,CACNB4,ATP1B2,ANK1,KCNJ12,SLC9A5,KCNJ10,ADRB1,RELN,H…
GO:BP	regulation of locomotion	GO:0040012	2.15e-21	20.6678	1039	1390	136	27543	SCRT1,PLCB1,FBXW7,SMAD3,ZFP703,NBL1,WNT4,PAK1,CHST2,FGF9,ZMYND8,PLXND1,PPP3CA,S1PR1,ADORA1,ABHD6,PHACTR1,ERBB4,FUT9,DAB2IP,AKT2,BMPER,MYO5A,IQSEC1,PTN,RAPGEF4,DUSP1,DMTN,CADM4,ADARB1,FBXO31,ACTN4,LRRK2,FAM107A,ADAM9,LMO4,CXCL14,PTPRT,PTK2,DOCK4,FERMT2,CTNNA2,GRIN1,SRCIN1,SCRT2,HDAC4,IL12A,NAV3,ATP1B2,HBEGF,PTPRZ1,SCAI,TBC1D24,PRKCA,TPM1,FOXO3,SWAP70,PGR,PIN1,APC,FLRT2,SMPD3,CXCL12,RELN,PPARD,SRC,…
GO:BP	regulation of cell motility	GO:2000145	2.17e-21	20.6627	991	1390	132	27543	SCRT1,PLCB1,FBXW7,SMAD3,ZFP703,NBL1,WNT4,PAK1,CHST2,FGF9,ZMYND8,PLXND1,PPP3CA,S1PR1,ADORA1,ABHD6,PHACTR1,ERBB4,FUT9,DAB2IP,AKT2,BMPER,MYO5A,IQSEC1,PTN,RAPGEF4,DUSP1,DMTN,CADM4,ADARB1,FBXO31,ACTN4,FAM107A,ADAM9,LMO4,CXCL14,PTPRT,PTK2,DOCK4,FERMT2,CTNNA2,GRIN1,SRCIN1,SCRT2,HDAC4,IL12A,NAV3,ATP1B2,HBEGF,PTPRZ1,SCAI,TBC1D24,PRKCA,TPM1,FOXO3,SWAP70,PGR,PIN1,APC,FLRT2,SMPD3,CXCL12,RELN,PPARD,SRC,TRIB1,…
GO:BP	secretion by cell	GO:0032940	2.47e-21	20.6073	886	1390	123	27543	RPH3A,NRN1,GIT1,LY6E,GRM2,SNAP25,SYT2,DIO2,PRKCB,KCNA2,CALM1,RIMS3,CACNA1I,ADCY1,PPP3CA,RIMS1,APLN,ADORA1,TYRO3,PIP5K1C,EXPH5,NRXN1,PPP1R9A,CDK16,CDK5R2,CPLX2,STX1B,MYO5A,OLFR78,RAPGEF4,SPTBN2,MYRIP,CRY2,PRRT2,DMTN,EFNA5,SYT1,RASGRP1,RIMS4,MYO18A,OTOF,LRRK2,SYT12,ERC2,ADAM9,BRSK2,MERTK,APBB1,SRCIN1,STXBP1,IL12A,CACNB4,GRIK5,MAPK9,APBA2,PPFIA3,SYTL1,RAB15,CNR1,NR1D1,RASL10B,ADRB1,SMPD3,CXCL12,PDE8…
GO:BP	protein metabolic process	GO:0019538	3.58e-21	20.4464	5623	1390	441	27543	MAPK4,MAP6D1,ARPP19,ENDOU,TTL,PLCB1,FBXW7,CAMKK2,NOS1AP,PPME1,SMAD3,PTPN3,MAPK6,GFRA2,KCTD17,GRIN2A,NLK,CD6,PDP1,PRKCB,CALM1,SLC39A10,HEG1,WNT9A,DUSP7,TTLL11,TRPC6,BAP1,DLG4,JDP2,PAK1,HERC6,FGF9,DPY19L1,CAMK4,WFS1,WSB2,MAST3,TRIM37,CYFIP2,CCNG1,PPP3CA,MAN1C1,BOK,DLGAP1,SENP2,ST3GAL5,ZDHHC8,DUSP14,GUCY2G,ADORA1,DPP8,GALNT18,LMTK2,TYRO3,FBXL16,PPP2R2C,MAN2A1,OBSCN,NRXN1,DPP10,PPP1R9A,CDK16,ALOX12B,…
GO:BP	transmembrane transport	GO:0055085	4.9e-21	20.3101	1518	1390	173	27543	RPH3A,GABRD,PLCB1,ANO3,NOS1AP,PTPN3,SNAP25,GRIN2A,KCNC1,PRKCB,KCNA2,CALM1,SLC39A10,SLC13A5,KCNA1,SLC24A2,CACNA1I,ATP2B2,TRPC6,LASP1,DLG4,LRRC8B,ARC,ITPR1,ATP1A1,SFXN5,ATP2B1,SCN8A,GABRA1,SLC25A23,CACNB3,SLC30A4,RGS7,ABCD2,NRXN1,NETO2,SLC35E2,SLC6A1,GRIA4,SORT1,ERBB4,SLC16A6,KCNIP3,AKT2,MYO5A,SHANK1,GABRB2,CACNA2D3,SLC1A3,JSRP1,TFRC,KCNJ6,SLC23A3,KCNH1,GLRB,RAMP3,JPH3,SHANK3,SLC25A18,SLC25A37,RYR1…
GO:BP	macromolecule localization	GO:0033036	5.52e-21	20.2581	2970	1390	275	27543	RPH3A,FBXW7,ANO3,GIT1,WHRN,SNAP25,TTC7B,SORBS2,GRIN2A,NBL1,CALM1,STARD10,HEG1,KCNA1,DLG4,PACSIN1,PITPNM2,FGF9,ARC,GPM6B,ZMYND8,PPP3CA,BSN,DLGAP1,CHRDL1,SENP2,ZDHHC8,RIMS1,KIF5C,ADORA1,LMTK2,ASTN2,SYNDIG1,EXPH5,IQSEC2,ARHGEF9,AP1S1,CACNB3,NRXN1,DPP10,RAB6B,CDK16,SORT1,RILPL1,ERBB4,SYNE1,STX1B,KCNIP3,SPCS3,AKT2,BMPER,MYO5A,OLFR78,PTN,CNTNAP1,SHANK1,RAPGEF4,SPIRE1,MYRIP,OSBP2,CRY2,MAP1A,ARF3,JSRP1,T…
GO:BP	positive regulation of multicellular organismal process	GO:0051240	1.05e-20	19.978	1595	1390	178	27543	MGLL,PLCB1,ZFPM1,SMAD3,ZFP703,DIO2,CD6,PRKCB,OLFM1,WNT4,HEG1,FGF9,CUX2,ATP1A1,GPM6B,PLXND1,PPP3CA,LRTM2,ATP2B1,APLN,SYNDIG1,RORA,MAN2A1,NRXN1,ALOX12B,ERBB4,BMPER,PTN,RAPGEF4,TFRC,HSPA1B,PTPRD,DMTN,CLSTN1,EFNA5,RASGRP1,SHANK3,FBXO31,ZBTB16,TESC,ZMIZ1,NPTN,LRRK2,TLE6,PRKAR1B,PRKCZ,PTK2,FERMT2,ADRA2C,FZD3,HDAC4,IL12A,POU2F2,ESRRG,MAPK9,PTPRZ1,PDE5A,ZFP365,TBC1D24,PRKCA,BAIAP2,TPM1,CNR1,FOXO3,PIN1,FL…
GO:BP	inorganic ion transmembrane transport	GO:0098660	1.27e-20	19.8948	844	1390	118	27543	GABRD,PLCB1,ANO3,NOS1AP,PTPN3,SNAP25,GRIN2A,KCNC1,KCNA2,CALM1,SLC39A10,KCNA1,SLC24A2,CACNA1I,ATP2B2,TRPC6,ITPR1,ATP1A1,ATP2B1,SCN8A,GABRA1,SLC25A23,CACNB3,SLC30A4,RGS7,NETO2,SLC6A1,KCNIP3,MYO5A,GABRB2,CACNA2D3,SLC1A3,JSRP1,TFRC,KCNJ6,KCNH1,GLRB,RAMP3,JPH3,SLC25A37,RYR1,SCN1B,TESC,SLC12A5,GRIN1,KCNQ3,HECW1,KCNJ9,CACNG2,SLC4A11,GABRG2,CACNB4,ATP1B2,ANK1,KCNJ12,SLC9A5,KCNJ10,ADRB1,HCN1,ATP2A1,KCNK12…
GO:BP	cellular response to organic substance	GO:0071310	1.47e-20	19.8325	2794	1390	262	27543	PLCB1,GIT1,CCDC3,SMAD3,ZFP703,ATF6,GRIN2A,NLK,NBL1,CD6,PRKCB,WNT4,PAK1,FGF9,BRINP1,WFS1,ADCY1,ITPR1,CUX2,ATP1A1,CYFIP2,PPP3CA,BOK,CHRDL1,ATP2B1,GABRA1,APLN,ACKR1,LMTK2,RORA,IL11RA1,LIFR,NRXN1,LRRC32,CDK16,SORT1,ERBB4,SMARCD1,DAB2IP,AKT2,BMPER,MYO5A,INPPL1,MYLK3,OLFR78,VASN,BRINP2,GABRB2,CRY2,SLC1A3,NR3C1,DUSP1,MPL,CDK19,TFRC,HSPA1B,PAQR8,DMTN,CADM4,MRAS,EFNA5,RAMP3,RYR1,MYO18A,EXT1,TESC,ACTN4,ZMI…
GO:BP	cognition	GO:0050890	1.8e-20	19.7438	353	1390	71	27543	PLCB1,GIT1,SNAP25,GRIN2A,SLC24A2,BRINP1,CAMK4,ARC,ADCY1,CUX2,ADORA1,NRXN1,SLC6A1,PTN,SHANK1,MAP1A,SPECC1,JPH3,SHANK3,JPH4,NPTN,PPP1R9B,FAM107A,SLC12A5,PRKAR1B,PRKCZ,GRIN1,SORCS3,PTPRZ1,PDE5A,SYNGAP1,CNR1,ADRB1,EGR2,PDE8B,NRXN3,RELN,TBR1,CRTC1,TTBK1,NTRK2,PPP1R1B,PTGS2,TRPM4,EGR1,BRSK1,KCNK2,HTT,B4GALT2,FZD9,SRF,ATP1A2,CALB1,CSMD1,SHANK2,SLC8A2,TANC1,HTR6,DGKI,ASIC1,MEF2C,EGFR,KCNAB1,CIC,S100B,CBR…
GO:BP	learning or memory	GO:0007611	2.65e-20	19.5771	319	1390	67	27543	PLCB1,GIT1,SNAP25,GRIN2A,SLC24A2,BRINP1,CAMK4,ARC,ADCY1,CUX2,NRXN1,SLC6A1,PTN,SHANK1,MAP1A,SPECC1,JPH3,SHANK3,JPH4,NPTN,PPP1R9B,SLC12A5,PRKAR1B,PRKCZ,GRIN1,SORCS3,PTPRZ1,PDE5A,SYNGAP1,CNR1,ADRB1,EGR2,PDE8B,NRXN3,RELN,TBR1,CRTC1,TTBK1,NTRK2,PPP1R1B,PTGS2,TRPM4,EGR1,BRSK1,KCNK2,HTT,B4GALT2,FZD9,SRF,ATP1A2,CALB1,CSMD1,SHANK2,SLC8A2,TANC1,HTR6,DGKI,ASIC1,MEF2C,EGFR,KCNAB1,CIC,S100B,DRD4,ABCC8,BDNF,CRH
GO:BP	positive regulation of cell differentiation	GO:0045597	3.32e-20	19.4791	948	1390	126	27543	PLCB1,CCDC3,SMAD3,ZFP703,NBL1,OLFM1,WNT4,WNT9A,TRPC6,BRINP1,CUX2,PLXND1,PPP3CA,MEDAG,MAN2A1,DKKL1,MYLK3,PTN,BRINP2,MPL,CDS1,HSPA1B,PTPRD,DMTN,EFNA5,RASGRP1,SHANK3,FBXO31,ZBTB16,TESC,ZMIZ1,NPTN,TLE6,PRKCZ,PTK2,FERMT2,ADRA2C,FZD3,IL12A,MAPK9,PTPRZ1,PDE5A,ZFP365,METRNL,TBC1D24,BAIAP2,FOXO3,PIN1,DAB1,ADRB1,EGR2,CXCL12,RELN,FRZB,PPARG,TRIB1,TRAK1,PLXNA4,NTRK2,IL4RA,MAPK14,PTGS2,CEBPA,ZBTB7B,PREX1,TRPM…
GO:BP	regulation of protein modification process	GO:0031399	4.06e-20	19.391	1574	1390	175	27543	ARPP19,FBXW7,CAMKK2,NOS1AP,GFRA2,CD6,CALM1,SLC39A10,HEG1,DUSP7,TRPC6,DLG4,JDP2,PAK1,FGF9,WFS1,CCNG1,SENP2,ADORA1,NRXN1,PPP1R9A,ERBB4,CDK5R2,DAB2IP,AKT2,BMPER,INPPL1,CRY2,INCENP,DUSP1,TFRC,RASSF2,HSPA1B,CCDC88C,DMTN,CADM4,ADARB1,EFNA5,RASGRP1,RAMP3,ZMIZ1,NPTN,LRRK2,CDK2AP1,PPP1R9B,FAM107A,ADAM9,HHATL,SIRPA,PRKAR1B,PRKCZ,PTPRT,PTK2,FERMT2,ARR3,ADRA2C,SRCIN1,HDAC4,FGFR3,IL12A,RAMP1,HBEGF,MAPK9,PTPRB…
GO:BP	growth	GO:0040007	5.59e-20	19.2525	1063	1390	135	27543	MGLL,TTL,NRN1,PLCB1,LY6E,SMAD3,CPNE9,SYT2,SORBS2,ETNK2,PRKCB,OLFM1,HEG1,BAP1,FGF9,WFS1,CYFIP2,S1PR1,RIMS1,IGFBP4,FMN1,RTN4R,FSTL4,ERBB4,DAB2IP,PTN,SPTBN2,PTGFRN,HSPA1B,CLSTN1,ADARB1,VGLL4,EFNA5,SYT1,EXT1,ZMIZ1,SLC1A2,PPP1R9B,FAM107A,DACT3,WWC1,KCTD6,SLC12A5,PRKCZ,PTK2,RASAL2,HBEGF,DCBLD2,APBA2,ANKRD11,FOXO3,PIN1,ADRB1,DIO3,ESRRB,PLEC,SMPD3,CXCL12,DIP2B,FRZB,PPARD,SRC,PPARG,CDK5R1,RBPJ,NRN1L,PSRC1…
GO:BP	enzyme-linked receptor protein signaling pathway	GO:0007167	7.03e-20	19.1533	956	1390	126	27543	PLCB1,FBXW7,SIPA1L1,GIT1,SMAD3,GFRA2,ZFP703,NLK,NBL1,PRKCB,WNT4,PAK1,FGF9,CYFIP2,CHRDL1,IGFBP4,APLN,GUCY2G,ADORA1,LMTK2,TYRO3,LIFR,NRXN1,LRRC32,FSTL4,SORT1,ERBB4,DAB2IP,AKT2,BMPER,INPPL1,VASN,RASSF2,CADM4,EFNA5,EXT1,ZMIZ1,NPTN,ADAM9,PRKCZ,PIP4K2C,MERTK,PTPRT,PTK2,FERMT2,MYO1E,FGFRL1,FGFR3,IL12A,HTRA1,HBEGF,BTBD11,PIN1,APC,FLRT2,SMPD3,SRC,CDK5R1,RNF165,RBPJ,NREP,RASL11B,IGFBP6,CSRNP1,NTRK2,GIPC1,Z…
GO:BP	circulatory system development	GO:0072359	8.4e-20	19.0758	1180	1390	144	27543	FBXW7,ZFPM1,LY6E,SMAD3,TNNC1,SORBS2,PRKCB,OLFM1,WNT4,HEG1,FGF9,MYBPC3,PLXND1,SENP2,S1PR1,APLN,RORA,NRXN1,ERBB4,DAB2IP,BMPER,MYLK3,PTN,LUZP1,HEY1,PPP3R1,VGLL4,RYR1,EXT1,ZMIZ1,LMO4,NRCAM,PTK2,MYO1E,FGFRL1,IL12A,RAMP1,HBEGF,MIB1,PTPRB,MICAL2,PRKCA,TPM1,PIN1,FLRT2,ADRB1,HS6ST1,PLEC,EGR2,CXCL12,NRXN3,PPARD,PPARG,RBPJ,DHRS3,PLXNA4,NTRK2,MEF2D,RPS6KA2,RB1CC1,EPAS1,MAPK14,PTGS2,SCX,PLCD3,EGR1,DUSP6,MYH10…
GO:BP	positive regulation of cellular metabolic process	GO:0031325	1.23e-19	18.9084	3386	1390	298	27543	ARPP19,PLCB1,FBXW7,CAMKK2,DGKZ,NFIC,GIT1,ZFPM1,NOS1AP,SMAD3,ATF6,CD6,PRKCB,CALM1,SLC39A10,WNT4,TRPC6,DLG4,JDP2,CAMTA2,PAK1,FGF9,CAMK4,WFS1,TRIM37,CYFIP2,PPP3CA,BOK,SENP2,S1PR1,APLN,ADORA1,LMTK2,ZMIZ2,TYRO3,RORA,NRXN1,PPP1R9A,MAF,ERBB4,CDK5R2,DAB2IP,AKT2,ZBTB18,LPGAT1,PACSIN3,SPIRE1,INCENP,DAGLB,BTBD10,RNF144A,TFRC,SSBP3,ASH1L,RASSF2,PPP3R1,HSPA1B,FOXK1,ADARB1,VGLL4,EFNA5,RASGRP1,RAMP3,SLC25A37,HI…
GO:BP	inorganic cation transmembrane transport	GO:0098662	1.27e-19	18.895	774	1390	110	27543	PLCB1,NOS1AP,PTPN3,SNAP25,GRIN2A,KCNC1,KCNA2,CALM1,SLC39A10,KCNA1,SLC24A2,CACNA1I,ATP2B2,TRPC6,ITPR1,ATP1A1,ATP2B1,SCN8A,SLC25A23,CACNB3,SLC30A4,RGS7,NETO2,SLC6A1,KCNIP3,MYO5A,CACNA2D3,SLC1A3,JSRP1,TFRC,KCNJ6,KCNH1,RAMP3,JPH3,SLC25A37,RYR1,SCN1B,TESC,SLC12A5,GRIN1,KCNQ3,HECW1,KCNJ9,CACNG2,SLC4A11,CACNB4,ATP1B2,ANK1,KCNJ12,SLC9A5,KCNJ10,ADRB1,HCN1,ATP2A1,KCNK12,KCNJ11,PRKCE,STIM2,SLC6A17,SLC36A1,A…
GO:BP	regulation of synapse structure or activity	GO:0050803	1.35e-19	18.8697	258	1390	59	27543	SIPA1L1,LZTS3,RIMS3,ARC,CUX2,ZMYND8,LRTM2,SYNDIG1,NRXN1,PPP1R9A,DAB2IP,STX1B,PTN,RAPGEF4,FARP1,PTPRD,CLSTN1,EFNA5,ABHD17A,RIMS4,SHANK3,HOMER1,LRRK2,PTPRT,NRCAM,PTK2,CTNNA2,GRIN1,SRCIN1,NEGR1,SYNGAP1,BAIAP2,FLRT2,RELN,CDK5R1,NTRK2,LRP4,MAPK14,NTNG2,MAGI2,MYH10,CDKL5,SLITRK1,VHL,NTRK3,STAU2,ARHGAP33,SHANK2,TANC1,IL1RAPL1,MEF2C,PTPRS,PTPRF,NPTX1,TANC2,AMIGO1,EPHB1,BDNF,NEURL1A
GO:BP	regulation of protein phosphorylation	GO:0001932	1.98e-19	18.7037	1140	1390	140	27543	FBXW7,CAMKK2,GFRA2,CD6,HEG1,DUSP7,TRPC6,DLG4,PAK1,FGF9,CCNG1,SENP2,ADORA1,NRXN1,PPP1R9A,ERBB4,CDK5R2,DAB2IP,AKT2,BMPER,INPPL1,INCENP,DUSP1,TFRC,RASSF2,CCDC88C,DMTN,CADM4,ADARB1,EFNA5,RASGRP1,RAMP3,NPTN,LRRK2,CDK2AP1,PPP1R9B,ADAM9,SIRPA,PRKAR1B,PRKCZ,PTPRT,PTK2,FERMT2,ARR3,ADRA2C,SRCIN1,FGFR3,IL12A,HBEGF,MAPK9,PTPRB,PTPRZ1,PDE5A,ZFP91,PIN1,APC,DAB1,PLEC,SMPD3,RELN,AGAP2,ARRB1,SRC,CDK5R1,HIPK3,TRIB…
GO:BP	synapse assembly	GO:0007416	2.76e-19	18.5588	189	1390	50	27543	SIPA1L1,LGI2,CUX2,PLXND1,LRTM2,BSN,GABRA1,SYNDIG1,ARHGEF9,NRXN1,PPP1R9A,ERBB4,SPTBN2,GABRB2,FARP1,PTPRD,CLSTN1,EFNA5,SHANK3,NPTN,PTK2,GRIN1,GABRG2,NEGR1,FLRT2,PCLO,NRXN3,RELN,NTRK2,LRP4,NTNG2,CACNA1A,MAGI2,NUMB,SDK1,SLITRK1,NTRK3,STAU2,PLXNB1,SHANK2,SDK2,IL1RAPL1,MEF2C,PTPRS,NPTX1,ADD2,AMIGO1,EPHB1,DSCAM,BDNF
GO:BP	regulation of nitrogen compound metabolic process	GO:0051171	3.22e-19	18.4918	5797	1390	444	27543	SCRT1,ARPP19,PLCB1,FBXW7,CAMKK2,NFIC,GIT1,ZFPM1,NOS1AP,SMAD3,PTPN3,CUX1,KCTD1,GFRA2,ZFP703,ATF6,GRIN2A,NLK,CD6,PRKCB,CALM1,SLC39A10,WNT4,HEG1,WNT9A,RASD1,DUSP7,TRPC6,BAP1,DLG4,JDP2,CAMTA2,PAK1,FGF9,CAMK4,WFS1,ADCY1,CUX2,ZMYND8,TRIM37,CYFIP2,CCNG1,PPP3CA,BOK,DLGAP1,SENP2,S1PR1,RBFOX1,APLN,ADORA1,ZMIZ2,RORA,NRXN1,PPP1R9A,PKNOX2,CDK16,RBFOX3,MAF,ERBB4,CDK5R2,SMARCD1,DAB2IP,KCNIP3,AKT2,BMPER,ZBTB18,I…
GO:BP	cellular protein metabolic process	GO:0044267	3.66e-19	18.4363	4958	1390	394	27543	MAPK4,MAP6D1,ARPP19,TTL,FBXW7,CAMKK2,NOS1AP,PPME1,SMAD3,PTPN3,MAPK6,GFRA2,KCTD17,NLK,CD6,PDP1,PRKCB,CALM1,SLC39A10,HEG1,WNT9A,DUSP7,TTLL11,TRPC6,BAP1,DLG4,JDP2,PAK1,HERC6,FGF9,DPY19L1,CAMK4,WFS1,WSB2,MAST3,TRIM37,CYFIP2,CCNG1,PPP3CA,BOK,DLGAP1,SENP2,ST3GAL5,ZDHHC8,DUSP14,GUCY2G,ADORA1,GALNT18,LMTK2,TYRO3,FBXL16,PPP2R2C,MAN2A1,OBSCN,NRXN1,PPP1R9A,CDK16,ALOX12B,GCNT4,ERBB4,CDK5R2,FUT9,DAB2IP,SPCS3,…
GO:BP	regulation of cell development	GO:0060284	5.51e-19	18.2591	576	1390	91	27543	PLCB1,FBXW7,LINGO1,TRPC6,BRINP1,CUX2,PLXND1,PPP3CA,RTN4R,MAN2A1,FSTL4,PTN,GPR37L1,MPL,PTPRD,DMTN,EFNA5,SHANK3,FBXO31,BHLHE40,ACTN4,NPTN,LRRK2,TLE6,HES3,PTK2,FERMT2,FZD3,HDAC4,MAPK9,PTPRZ1,PDE5A,ZFP365,SYNGAP1,TBC1D24,BAIAP2,NR1D1,DAB1,ZDHHC21,EGR2,CXCL12,DIP2B,RELN,FRZB,PPARG,CDK5R1,TRIB1,TRAK1,PLXNA4,NTRK2,LRP4,PREX1,AKAP5,CDKL5,MYOD1,NUMB,SRF,GLI3,SLITRK1,ASCL1,NTRK3,METRN,STAU2,SORL1,ARHGEF2,R…
GO:BP	vesicle-mediated transport in synapse	GO:0099003	6.03e-19	18.2197	240	1390	56	27543	NRN1,GIT1,SNAP25,PRKCB,CALM1,RIMS3,PACSIN1,ARC,ADCY1,BSN,SYNDIG1,PIP5K1C,NRXN1,CPLX2,STX1B,IQSEC1,RAPGEF4,SPTBN2,PPP3R1,PRRT2,CLSTN1,SYT1,RIMS4,OTOF,LRRK2,SYT12,ERC2,PRKAR1B,STXBP1,CACNB4,GRIK5,APBA2,PPFIA3,TBC1D24,CNR1,PCLO,NRXN3,NAPA,STXBP5L,CDK5R1,PRKCE,CPLX1,GIPC1,UNC13A,CACNA1A,MAGI2,BRSK1,AKAP5,NUMB,UNC13B,HTR1B,SLC4A8,DGKI,ADRA1A,DRD4,SNCB
GO:BP	regulation of synapse organization	GO:0050807	1.06e-18	17.9767	251	1390	57	27543	SIPA1L1,LZTS3,RIMS3,ARC,CUX2,ZMYND8,LRTM2,SYNDIG1,NRXN1,PPP1R9A,DAB2IP,PTN,RAPGEF4,FARP1,PTPRD,CLSTN1,EFNA5,ABHD17A,RIMS4,SHANK3,HOMER1,LRRK2,PTPRT,NRCAM,PTK2,CTNNA2,GRIN1,SRCIN1,NEGR1,BAIAP2,FLRT2,RELN,CDK5R1,NTRK2,LRP4,MAPK14,NTNG2,MAGI2,MYH10,CDKL5,SLITRK1,VHL,NTRK3,STAU2,ARHGAP33,SHANK2,TANC1,IL1RAPL1,MEF2C,PTPRS,PTPRF,NPTX1,TANC2,AMIGO1,EPHB1,BDNF,NEURL1A
GO:BP	positive regulation of cellular component organization	GO:0051130	1.16e-18	17.9342	1149	1390	139	27543	PLCB1,GIT1,ASAP1,SMAD3,KCTD17,WNT4,DLG4,PACSIN1,PAK1,ITPR1,CUX2,ZMYND8,PLXND1,PPP3CA,LRTM2,BOK,APLN,FMN1,SYNDIG1,NRXN1,PPP1R9A,FUT9,DAB2IP,AKT2,IQSEC1,MYLK3,PTN,SPIRE1,TFRC,HSPA1B,PRRT2,PTPRD,CLSTN1,EFNA5,SYT1,SHANK3,FBXO31,SCN1B,ARHGEF10L,ACTN4,ATMIN,NPTN,LRRK2,ADAM9,ACSL6,PIP4K2C,APBB1,FERMT2,GRIN1,HDAC4,NAV3,ATP1B2,ANK1,MAPK9,NEGR1,MIB1,PTPRZ1,TBC1D24,BAIAP2,TPM1,CNR1,SWAP70,APC,FLRT2,SERPINI1…
GO:BP	protein localization	GO:0008104	1.28e-18	17.8915	2493	1390	236	27543	RPH3A,FBXW7,GIT1,WHRN,SNAP25,TTC7B,SORBS2,GRIN2A,NBL1,CALM1,HEG1,KCNA1,DLG4,PACSIN1,FGF9,GPM6B,ZMYND8,PPP3CA,BSN,DLGAP1,CHRDL1,SENP2,RIMS1,KIF5C,ADORA1,LMTK2,ASTN2,SYNDIG1,EXPH5,IQSEC2,ARHGEF9,AP1S1,CACNB3,NRXN1,DPP10,RAB6B,CDK16,SORT1,RILPL1,ERBB4,SYNE1,STX1B,KCNIP3,SPCS3,AKT2,BMPER,MYO5A,OLFR78,PTN,CNTNAP1,SHANK1,RAPGEF4,SPIRE1,MYRIP,CRY2,MAP1A,ARF3,JSRP1,TFRC,PPP3R1,DUSP18,DMTN,CLSTN1,EFNA5,AB…
GO:BP	cellular macromolecule metabolic process	GO:0044260	1.32e-18	17.8794	5820	1390	443	27543	MAPK4,MAP6D1,ARPP19,TTL,PLCB1,FBXW7,CAMKK2,NFIC,GIT1,NOS1AP,PPME1,SMAD3,PTPN3,MAPK6,GFRA2,KCTD17,NLK,CD6,PDP1,PRKCB,CALM1,SLC39A10,HEG1,WNT9A,DUSP7,TTLL11,TRPC6,BAP1,DLG4,JDP2,PAK1,HERC6,FGF9,DPY19L1,CAMK4,WFS1,WSB2,MAST3,TRIM37,CYFIP2,CCNG1,PPP3CA,MAN1C1,BOK,DLGAP1,SENP2,ST3GAL5,ZDHHC8,DUSP14,GUCY2G,ADORA1,GALNT18,LMTK2,TYRO3,FBXL16,PPP2R2C,MAN2A1,OBSCN,NRXN1,PPP1R9A,CDK16,ALOX12B,GCNT4,ERBB4,CD…
GO:BP	positive regulation of nitrogen compound metabolic process	GO:0051173	1.52e-18	17.8174	3177	1390	281	27543	PLCB1,FBXW7,CAMKK2,NFIC,ZFPM1,NOS1AP,SMAD3,ATF6,CD6,PRKCB,CALM1,SLC39A10,WNT4,TRPC6,DLG4,JDP2,CAMTA2,PAK1,FGF9,CAMK4,WFS1,TRIM37,CYFIP2,PPP3CA,BOK,SENP2,S1PR1,APLN,ADORA1,ZMIZ2,RORA,NRXN1,PPP1R9A,MAF,ERBB4,CDK5R2,DAB2IP,AKT2,ZBTB18,PACSIN3,SPIRE1,INCENP,RNF144A,TFRC,SSBP3,ASH1L,RASSF2,PPP3R1,HSPA1B,FOXK1,ADARB1,VGLL4,EFNA5,RASGRP1,RAMP3,SLC25A37,HIVEP2,ATXN7L3,ZBTB16,TESC,ACTN4,ZMIZ1,ATMIN,NPTN,L…
GO:BP	positive regulation of response to stimulus	GO:0048584	1.73e-18	17.7611	2264	1390	220	27543	PLCB1,FBXW7,DGKZ,SMAD3,ZNFX1,ATF6,GRIN2A,PRKCB,SLC39A10,STARD10,WNT9A,DLG4,SCUBE1,PAK1,FGF9,CUX2,CYFIP2,PPP3CA,BOK,S1PR1,IGFBP4,ADORA1,RTN4R,LYPD6,CACNB3,NRXN1,ALOX12B,ERBB4,DAB2IP,STX1B,AKT2,BMPER,MYO5A,OLFR78,PTN,SHANK1,SPIRE1,GPR37L1,CDK19,TFRC,RASSF2,HSPA1B,DMTN,ADRA1B,RASGRP1,RAMP3,SHANK3,ACTN4,ZMIZ1,NPTN,LRRK2,C1RA,ADAM9,TSPAN5,WWC1,PRKAR1B,NET1,PRKCZ,RASGEF1A,APBB1,CXCL14,PTK2,FERMT2,GRIN1…
GO:BP	muscle structure development	GO:0061061	2.74e-18	17.5627	689	1390	100	27543	PLCB1,ZFPM1,LY6E,SMAD3,TNNC1,SORBS2,WNT4,HEG1,FGF9,MYBPC3,PPP3CA,S1PR1,RBFOX1,RORA,SORT1,SYNE1,ZBTB18,MYLK3,CNTNAP1,PTGFRN,HEY1,FOXK1,ADARB1,RYR1,HOMER1,ACTN4,PLAGL1,PLEKHO1,CXCL14,FGFRL1,HDAC4,CACNB4,TPM1,MAPK12,PIN1,HIRA,ADRB1,PLEC,EGR2,CXCL12,ACTA1,PPARD,RNF165,RBPJ,USP2,MEF2D,IL4RA,EPAS1,MAPK14,SCX,EGR1,MYH10,FOXP1,MTPN,ACTN1,MYOD1,ENG,MYH7,SRF,HIVEP3,MBNL1,DDIT3,CSRP1,RYR2,TRIM72,PDLIM1,UTRN…
GO:BP	regulation of neurotransmitter levels	GO:0001505	2.89e-18	17.5394	239	1390	55	27543	RPH3A,NRN1,GIT1,SNAP25,SYT2,PRKCB,CALM1,RIMS3,ADCY1,GPM6B,NRXN1,PPP1R9A,SLC6A1,CPLX2,STX1B,SPTBN2,DAGLB,PRRT2,SYT1,RIMS4,OTOF,LRRK2,SYT12,SLC1A2,ERC2,STXBP1,CACNB4,GRIK5,APBA2,PPFIA3,KCNJ10,CNR1,PCLO,NRXN3,NAPA,STXBP5L,PRKCE,NTRK2,CPLX1,GIPC1,UNC13A,CACNA1A,BRSK1,ATP1A2,UNC13B,HTR1B,HTR6,SLC4A8,DGKI,ADRA1A,ASIC1,MEF2C,AGTPBP1,GAD1,DRD4
GO:BP	neurotransmitter transport	GO:0006836	3.09e-18	17.5101	231	1390	54	27543	RPH3A,NRN1,GIT1,SNAP25,SYT2,PRKCB,CALM1,RIMS3,ADCY1,GPM6B,RIMS1,NRXN1,PPP1R9A,SLC6A1,CPLX2,STX1B,SPTBN2,PRRT2,SYT1,RIMS4,OTOF,LRRK2,SYT12,SLC1A2,ERC2,STXBP1,CACNB4,GRIK5,APBA2,PPFIA3,KCNJ10,CNR1,PCLO,NRXN3,NAPA,STXBP5L,PRKCE,NTRK2,CPLX1,SLC6A17,GIPC1,UNC13A,CACNA1A,BRSK1,ATP1A2,UNC13B,HTR1B,HTR6,SLC4A8,DGKI,ADRA1A,ASIC1,MEF2C,DRD4
GO:BP	positive regulation of phosphorylation	GO:0042327	3.19e-18	17.4965	853	1390	114	27543	FBXW7,CAMKK2,DGKZ,CD6,TRPC6,DLG4,PAK1,FGF9,SENP2,APLN,ADORA1,LMTK2,TYRO3,NRXN1,PPP1R9A,ERBB4,CDK5R2,DAB2IP,AKT2,INCENP,BTBD10,TFRC,RASSF2,EFNA5,RASGRP1,RAMP3,NPTN,LRRK2,CDK2AP1,ADAM9,LMO4,PRKCZ,MERTK,PTK2,FERMT2,ADRA2C,SRCIN1,FGFR3,IL12A,HBEGF,MAPK9,PTPRZ1,PDE5A,ZFP91,PIN1,DAB1,ESRRB,RELN,AGAP2,ARRB1,SRC,CDK5R1,RANBP2,PSRC1,TTBK1,NTRK2,LRP4,MAP3K14,RB1CC1,PTGS2,EPHA8,SLC4A4,EGR1,PIM1,AKAP5,MAS1,D…
GO:BP	signal release from synapse	GO:0099643	3.41e-18	17.4673	176	1390	47	27543	RPH3A,NRN1,GIT1,SNAP25,SYT2,PRKCB,CALM1,RIMS3,ADCY1,NRXN1,PPP1R9A,CPLX2,STX1B,SPTBN2,PRRT2,SYT1,RIMS4,OTOF,LRRK2,SYT12,ERC2,STXBP1,CACNB4,GRIK5,APBA2,PPFIA3,CNR1,PCLO,NRXN3,NAPA,STXBP5L,PRKCE,NTRK2,CPLX1,GIPC1,UNC13A,CACNA1A,BRSK1,UNC13B,HTR1B,HTR6,SLC4A8,DGKI,ADRA1A,ASIC1,MEF2C,DRD4
GO:BP	neurotransmitter secretion	GO:0007269	3.41e-18	17.4673	176	1390	47	27543	RPH3A,NRN1,GIT1,SNAP25,SYT2,PRKCB,CALM1,RIMS3,ADCY1,NRXN1,PPP1R9A,CPLX2,STX1B,SPTBN2,PRRT2,SYT1,RIMS4,OTOF,LRRK2,SYT12,ERC2,STXBP1,CACNB4,GRIK5,APBA2,PPFIA3,CNR1,PCLO,NRXN3,NAPA,STXBP5L,PRKCE,NTRK2,CPLX1,GIPC1,UNC13A,CACNA1A,BRSK1,UNC13B,HTR1B,HTR6,SLC4A8,DGKI,ADRA1A,ASIC1,MEF2C,DRD4
GO:BP	positive regulation of transport	GO:0051050	3.41e-18	17.4668	1024	1390	128	27543	PLCB1,FBXW7,SNAP25,KCNC1,CALM1,KCNA1,CACNA1I,ATP2B2,TRPC6,ARC,WFS1,ITPR1,PPP3CA,BOK,ATP2B1,ZDHHC8,APLN,ADORA1,EXPH5,CACNB3,RGS7,SLC6A1,ALOX12B,ERBB4,CDK5R2,STX1B,AKT2,MYO5A,OLFR78,RAPGEF4,MYRIP,PRRT2,SYT1,RAMP3,SHANK3,HOMER1,MYO18A,SCN1B,TESC,ACTN4,LRRK2,SLC1A2,ADAM9,ACSL6,SIRPA,PRKCZ,MERTK,APBB1,PTK2,GRIN1,STXBP1,CACNG2,CACNB4,ATP1B2,MAPK9,MIB1,RAB15,CNR1,RASL10B,ADRB1,SMPD3,CXCL12,TUB,PCLO,RELN…
GO:BP	positive regulation of phosphate metabolic process	GO:0045937	3.74e-18	17.4271	939	1390	121	27543	FBXW7,CAMKK2,DGKZ,SMAD3,CD6,CALM1,SLC39A10,TRPC6,DLG4,PAK1,FGF9,SENP2,APLN,ADORA1,LMTK2,TYRO3,NRXN1,PPP1R9A,ERBB4,CDK5R2,DAB2IP,AKT2,INCENP,BTBD10,TFRC,RASSF2,EFNA5,RASGRP1,RAMP3,NPTN,LRRK2,CDK2AP1,ADAM9,LMO4,PRKCZ,MERTK,PTK2,FERMT2,ADRA2C,SRCIN1,FGFR3,IL12A,HBEGF,MAPK9,PTPRZ1,PDE5A,ZFP91,PIN1,DAB1,ESRRB,RELN,AGAP2,ARRB1,SRC,CDK5R1,RANBP2,PSRC1,TTBK1,NTRK2,LRP4,MAP3K14,RB1CC1,PTGS2,EPHA8,SLC4A4,M…
GO:BP	positive regulation of phosphorus metabolic process	GO:0010562	3.74e-18	17.4271	939	1390	121	27543	FBXW7,CAMKK2,DGKZ,SMAD3,CD6,CALM1,SLC39A10,TRPC6,DLG4,PAK1,FGF9,SENP2,APLN,ADORA1,LMTK2,TYRO3,NRXN1,PPP1R9A,ERBB4,CDK5R2,DAB2IP,AKT2,INCENP,BTBD10,TFRC,RASSF2,EFNA5,RASGRP1,RAMP3,NPTN,LRRK2,CDK2AP1,ADAM9,LMO4,PRKCZ,MERTK,PTK2,FERMT2,ADRA2C,SRCIN1,FGFR3,IL12A,HBEGF,MAPK9,PTPRZ1,PDE5A,ZFP91,PIN1,DAB1,ESRRB,RELN,AGAP2,ARRB1,SRC,CDK5R1,RANBP2,PSRC1,TTBK1,NTRK2,LRP4,MAP3K14,RB1CC1,PTGS2,EPHA8,SLC4A4,M…
GO:BP	response to organic substance	GO:0010033	4.38e-18	17.359	3750	1390	316	27543	PLCB1,GIT1,CCDC3,LY6E,SMAD3,GRM2,ZFP703,ATF6,SORBS2,GRIN2A,DIO2,KCNC1,NLK,NBL1,CD6,PRKCB,CALM1,WNT4,DLG4,PAK1,FGF9,BRINP1,WFS1,ADCY1,ITPR1,CUX2,ATP1A1,CYFIP2,CCNG1,PPP3CA,BOK,CHRDL1,ATP2B1,GABRA1,APLN,ACKR1,ADORA1,LMTK2,RORA,IL11RA1,RGS7,LIFR,NRXN1,LRRC32,SLC6A1,CDK16,SORT1,ERBB4,SMARCD1,DAB2IP,AKT2,BMPER,MYO5A,INPPL1,MYLK3,OLFR78,VASN,BRINP2,GABRB2,CRY2,SLC1A3,NR3C1,DUSP1,MPL,CDK19,TFRC,HSPA1B,P…
GO:BP	positive regulation of macromolecule metabolic process	GO:0010604	4.5e-18	17.3465	3592	1390	306	27543	PLCB1,FBXW7,CAMKK2,NFIC,GIT1,WHRN,ZFPM1,NOS1AP,SMAD3,ATF6,CD6,PRKCB,CALM1,OLFM1,SLC39A10,WNT4,HEG1,TRPC6,DLG4,JDP2,CAMTA2,PAK1,FGF9,CAMK4,WFS1,CUX2,TRIM37,CYFIP2,PPP3CA,BOK,SENP2,S1PR1,APLN,ADORA1,ZMIZ2,RORA,NRXN1,PPP1R9A,LRRC32,ALOX12B,MAF,ERBB4,CDK5R2,SMARCD1,DAB2IP,AKT2,ZBTB18,PACSIN3,SPIRE1,INCENP,MPL,RNF144A,TFRC,SSBP3,ASH1L,RASSF2,PPP3R1,HSPA1B,FOXK1,ADARB1,VGLL4,EFNA5,RASGRP1,RAMP3,SLC25A3…
GO:BP	regulation of transmembrane transport	GO:0034762	5.4e-18	17.2676	595	1390	91	27543	RPH3A,PLCB1,NOS1AP,PTPN3,GRIN2A,KCNC1,PRKCB,KCNA2,CALM1,KCNA1,CACNA1I,TRPC6,DLG4,ARC,SCN8A,CACNB3,RGS7,NRXN1,NETO2,ERBB4,KCNIP3,AKT2,MYO5A,SHANK1,CACNA2D3,JSRP1,KCNJ6,KCNH1,RAMP3,JPH3,SHANK3,HOMER1,SCN1B,TESC,SLC1A2,ACSL6,GRIN1,KCNQ3,HECW1,KCNJ9,CACNG2,CACNB4,ATP1B2,KCNJ12,KCNJ10,ADRB1,RELN,HCN1,ATP2A1,KCNK12,KCNJ11,PRKCE,STIM2,AHNAK,MAPK14,HECW2,TMEM38A,CLCN2,CACNA1A,PIM1,AKAP5,HTT,KCNN2,DLG1,KC…
GO:BP	signal release	GO:0023061	5.77e-18	17.239	563	1390	88	27543	RPH3A,NRN1,GIT1,GRM2,SNAP25,SYT2,DIO2,PRKCB,KCNA2,CALM1,RIMS3,ADCY1,PPP3CA,APLN,ADORA1,NRXN1,PPP1R9A,CDK16,CPLX2,STX1B,MYO5A,OLFR78,RAPGEF4,SPTBN2,MYRIP,CRY2,PRRT2,EFNA5,SYT1,RIMS4,OTOF,LRRK2,SYT12,ERC2,BRSK2,STXBP1,CACNB4,GRIK5,MAPK9,APBA2,PPFIA3,CNR1,NR1D1,RASL10B,ADRB1,SMPD3,CXCL12,PDE8B,PCLO,NRXN3,NAPA,PPARD,ARRB1,PPARG,STXBP5L,KCNJ11,PRKCE,NTRK2,CPLX1,GIPC1,SYT13,ACVR1C,UNC13A,PTGS2,CACNA1A,…
GO:BP	establishment of localization in cell	GO:0051649	6e-18	17.2219	1998	1390	200	27543	MAP6D1,TTL,RPH3A,NRN1,FBXW7,GIT1,TNNC1,SNAP25,SYT2,PRKCB,CALM1,RIMS3,MEI1,PACSIN1,FGF9,ARC,ADCY1,GPM6B,PPP3CA,BOK,BSN,RIMS1,KIF5C,ADORA1,LMTK2,SYNDIG1,PIP5K1C,EXPH5,AP1S1,CACNB3,NRXN1,PPP1R9A,RAB6B,MYO5C,SLC6A1,LYST,CDK16,SORT1,RILPL1,SYNE1,CPLX2,STX1B,KCNIP3,SPCS3,AKT2,MYO5A,IQSEC1,RAPGEF4,SPIRE1,SPTBN2,MYRIP,CRY2,MAP1A,INCENP,ARF3,PPP3R1,HSPA1B,PRRT2,CCDC88C,DUSP18,DMTN,EFNA5,SYT1,RASGRP1,RAMP3…
GO:BP	cell-cell adhesion	GO:0098609	8.14e-18	17.0893	887	1390	116	27543	ZFP703,CD6,WNT4,DLG4,CHST2,CYFIP2,PPP3CA,ASTN2,TYRO3,PIP5K1C,NRXN1,LRRC32,FUT9,TTYH1,MPL,TFRC,PTPRD,DMTN,CLSTN1,EFNA5,RASGRP1,EXT1,ZBTB16,ZMIZ1,NPTN,MEGF11,CTNND2,ADAM9,SIRPA,PRKCZ,PCDHAC1,PTPRT,NRCAM,PTK2,CTNNA2,STXBP1,FCHO1,FGFRL1,IL12A,IGDCC4,ATP1B2,LRRC4C,NEGR1,PDE5A,PRKCA,FOXO3,SWAP70,DAB1,ZDHHC21,CXCL12,IGSF9B,SRC,PKP1,CDK5R1,ITGAL,FAT3,CDH12,CELSR2,IL4RA,ZDHHC2,MAPK14,NTNG2,DUSP3,ZBTB7B,MA…
GO:BP	regulation of ion transmembrane transport	GO:0034765	8.15e-18	17.0888	502	1390	82	27543	RPH3A,PLCB1,NOS1AP,PTPN3,GRIN2A,KCNC1,KCNA2,CALM1,KCNA1,CACNA1I,TRPC6,DLG4,ARC,SCN8A,CACNB3,RGS7,NRXN1,NETO2,KCNIP3,MYO5A,SHANK1,CACNA2D3,JSRP1,KCNJ6,KCNH1,RAMP3,JPH3,SHANK3,HOMER1,SCN1B,TESC,GRIN1,KCNQ3,HECW1,KCNJ9,CACNG2,CACNB4,ATP1B2,KCNJ12,KCNJ10,ADRB1,RELN,HCN1,ATP2A1,KCNK12,KCNJ11,PRKCE,STIM2,AHNAK,HECW2,TMEM38A,CLCN2,CACNA1A,AKAP5,HTT,KCNN2,DLG1,KCNS2,ATP1A2,RYR2,TMEM37,PCSK9,LRRC38,PDPK1,…
GO:BP	cell population proliferation	GO:0008283	1.1e-17	16.9579	2109	1390	207	27543	SMAD3,ZFP703,CD6,SLC39A10,WNT4,WNT9A,KCNA1,BAP1,PAK1,FGF9,ITPR1,CRIP2,PPP3CA,BOK,S1PR1,IGFBP4,APLN,ADORA1,RORA,IL11RA1,LIFR,LRRC32,ERBB4,DAB2IP,AKT2,BMPER,INPPL1,OLFR78,PTN,GPR37L1,DUSP1,MPL,DAGLB,TFRC,SSBP3,HSPA1B,CLEC11A,CADM4,ADARB1,VGLL4,RASGRP1,SHANK3,EXT1,ZBTB16,TESC,ZMIZ1,LRRK2,PPP1R9B,ACSL6,PRKCZ,PTK2,FERMT2,FZD3,FGFRL1,HDAC4,FGFR3,IL12A,CACNB4,HTRA1,HBEGF,PTPRZ1,PDE5A,LGI4,PRKCA,TPM1,ETV…
GO:BP	actin cytoskeleton organization	GO:0030036	1.75e-17	16.7563	718	1390	101	27543	STARD8,SIPA1L1,NOS1AP,SMAD3,SORBS2,ARHGEF17,WNT4,PACSIN1,PAK1,GPM6B,CYFIP2,S1PR1,FMN1,INF2,PHACTR1,PPP1R9A,MYO5C,MYO5A,IQSEC1,INPPL1,MYLK3,SHANK1,SPIRE1,SPTBN2,FARP1,DMTN,EFNA5,SPECC1,SHANK3,MYO18A,SPTB,ARHGEF10L,ACTN4,PPP1R9B,FAM107A,TLE6,BRSK2,SIRPA,FERMT2,CTNNA2,MYO1E,MICAL2,BAIAP2,TPM1,SWAP70,CIT,PLEC,ACTA1,AGAP2,ARRB1,SRC,PHACTR3,CDK5R1,PRKCE,RAP1GDS1,SH3BP1,CORO2B,FMNL1,MYH10,FOXP1,DLG1,MTP…
GO:BP	developmental growth	GO:0048589	1.86e-17	16.7307	765	1390	105	27543	MGLL,TTL,NRN1,PLCB1,LY6E,SMAD3,CPNE9,SYT2,SORBS2,ETNK2,OLFM1,HEG1,FGF9,CYFIP2,S1PR1,RIMS1,FMN1,RTN4R,FSTL4,ERBB4,PTN,SPTBN2,PTGFRN,ADARB1,VGLL4,EFNA5,SYT1,EXT1,ZMIZ1,SLC1A2,WWC1,SLC12A5,PRKCZ,PTK2,RASAL2,HBEGF,APBA2,ANKRD11,FOXO3,PIN1,ADRB1,DIO3,ESRRB,PLEC,SMPD3,CXCL12,DIP2B,PPARD,SRC,CDK5R1,RBPJ,NRN1L,PLXNA4,LRP4,ACVR1C,MAPK14,UNC13A,TBL1XR1,DUSP6,PIM1,KCNK2,CDKL5,FOXP1,DLG1,MTPN,NKD1,MYOD1,RBP4…
GO:BP	dendrite morphogenesis	GO:0048813	9.99e-17	16.0005	174	1390	45	27543	SIPA1L1,LZTS3,TRPC6,DLG4,ARC,CUX2,PPP3CA,PHACTR1,PPP1R9A,PTN,SHANK1,FARP1,PTPRD,PREX2,SHANK3,FBXO31,LRRK2,CTNND2,CTNNA2,GRIN1,SRCIN1,HECW1,PTPRZ1,ZFP365,TBC1D24,BAIAP2,RELN,CDK5R1,TRAK1,CELSR2,LRP4,HECW2,CACNA1A,AKAP5,CDKL5,NUMB,DCLK1,STAU2,ARHGAP33,PTPRF,TANC2,EPHB1,DSCAM,LZTS1,BTBD3
GO:BP	cell death	GO:0008219	1.03e-16	15.988	2208	1390	211	27543	FBXW7,NOS1AP,SMAD3,ATF6,GRIN2A,PRKCB,CALM1,OLFM1,SLC39A10,WNT4,WNT9A,BAP1,BRINP1,WFS1,ITPR1,CYFIP2,CCNG1,BOK,RASSF3,AIFM3,ADORA1,TYRO3,ARHGAP10,LIFR,GRIA4,SORT1,DKKL1,RILPL1,ERBB4,DAB2IP,KCNIP3,AKT2,PTN,GABRB2,GPR37L1,DUSP1,MPL,CDK19,BTBD10,TFRC,TMEM132A,RASSF2,HSPA1B,ADARB1,E030003E18RIK,RAMP3,MYO18A,ZBTB16,ACTN4,LRRK2,FBXO32,BRSK2,NET1,PRKCZ,MERTK,APBB1,PTK2,FERMT2,GRIN1,PLEKHO2,STXBP1,FZD3,HDA…
GO:BP	synaptic vesicle cycle	GO:0099504	1.24e-16	15.9048	215	1390	50	27543	NRN1,GIT1,SNAP25,PRKCB,CALM1,RIMS3,PACSIN1,ADCY1,BSN,SYNDIG1,PIP5K1C,NRXN1,CPLX2,STX1B,RAPGEF4,SPTBN2,PRRT2,SYT1,RIMS4,OTOF,LRRK2,SYT12,ERC2,PRKAR1B,STXBP1,CACNB4,GRIK5,APBA2,PPFIA3,TBC1D24,CNR1,PCLO,NRXN3,NAPA,STXBP5L,CDK5R1,PRKCE,CPLX1,GIPC1,UNC13A,CACNA1A,MAGI2,BRSK1,UNC13B,HTR1B,SLC4A8,DGKI,ADRA1A,DRD4,SNCB
GO:BP	regulation of cation channel activity	GO:2001257	1.28e-16	15.8927	175	1390	45	27543	RPH3A,NOS1AP,GRIN2A,KCNC1,CALM1,KCNA1,DLG4,ARC,CACNB3,NRXN1,NETO2,MYO5A,SHANK1,JSRP1,JPH3,SHANK3,HOMER1,SCN1B,CACNG2,CACNB4,ADRB1,RELN,HCN1,KCNJ11,STIM2,AHNAK,CACNA1A,HTT,DLG1,KCNS2,LRRC38,CACNA2D1,PPARGC1A,STAC3,CACNB1,ANK2,MEF2C,KCNAB1,AKAP6,ANK3,AMIGO1,DRD4,ABCC8,EDNRA,CRH
GO:BP	regulation of ion transmembrane transporter activity	GO:0032412	1.35e-16	15.8704	267	1390	56	27543	RPH3A,PLCB1,NOS1AP,PTPN3,GRIN2A,KCNC1,CALM1,KCNA1,TRPC6,DLG4,ARC,CACNB3,NRXN1,NETO2,MYO5A,SHANK1,JSRP1,JPH3,SHANK3,HOMER1,SCN1B,TESC,HECW1,CACNG2,CACNB4,ATP1B2,ADRB1,RELN,HCN1,ATP2A1,KCNJ11,STIM2,AHNAK,HECW2,CACNA1A,HTT,DLG1,KCNS2,ATP1A2,RYR2,PCSK9,LRRC38,CACNA2D1,PPARGC1A,STAC3,CACNB1,ANK2,MEF2C,KCNAB1,AKAP6,ANK3,AMIGO1,DRD4,ABCC8,EDNRA,CRH
GO:BP	regulation of cell death	GO:0010941	1.37e-16	15.8639	1796	1390	182	27543	FBXW7,NOS1AP,SMAD3,ATF6,GRIN2A,CALM1,OLFM1,SLC39A10,WNT4,WNT9A,WFS1,ITPR1,CCNG1,BOK,RASSF3,ADORA1,TYRO3,ARHGAP10,LIFR,GRIA4,SORT1,DKKL1,RILPL1,ERBB4,DAB2IP,KCNIP3,AKT2,PTN,GABRB2,GPR37L1,DUSP1,MPL,CDK19,BTBD10,TFRC,TMEM132A,RASSF2,HSPA1B,E030003E18RIK,RAMP3,MYO18A,ZBTB16,ACTN4,LRRK2,FBXO32,NET1,PRKCZ,MERTK,APBB1,PTK2,FERMT2,GRIN1,STXBP1,FZD3,HDAC4,IL12A,HTRA1,GRIK5,MAPK9,PTPRZ1,PDE5A,SYNGAP1,TBC1…
GO:BP	regulation of transmembrane transporter activity	GO:0022898	1.63e-16	15.7867	277	1390	57	27543	RPH3A,PLCB1,NOS1AP,PTPN3,GRIN2A,KCNC1,CALM1,KCNA1,TRPC6,DLG4,ARC,CACNB3,NRXN1,NETO2,MYO5A,SHANK1,JSRP1,JPH3,SHANK3,HOMER1,SCN1B,TESC,HECW1,CACNG2,CACNB4,ATP1B2,ADRB1,RELN,HCN1,ATP2A1,KCNJ11,STIM2,AHNAK,HECW2,CACNA1A,PIM1,HTT,DLG1,KCNS2,ATP1A2,RYR2,PCSK9,LRRC38,CACNA2D1,PPARGC1A,STAC3,CACNB1,ANK2,MEF2C,KCNAB1,AKAP6,ANK3,AMIGO1,DRD4,ABCC8,EDNRA,CRH
GO:BP	regulation of macromolecule metabolic process	GO:0060255	1.94e-16	15.713	6825	1390	492	27543	SCRT1,ARPP19,PLCB1,FBXW7,CAMKK2,NFIC,GIT1,WHRN,ZFPM1,CCDC3,NOS1AP,SMAD3,PTPN3,CUX1,KCTD1,GFRA2,ZNFX1,ZFP703,ATF6,GRIN2A,NLK,CD6,PRKCB,CALM1,OLFM1,SLC39A10,WNT4,HEG1,WNT9A,RASD1,DUSP7,TRPC6,BAP1,DLG4,JDP2,CAMTA2,PAK1,FGF9,CAMK4,WFS1,ADCY1,CUX2,ZMYND8,TRIM37,CYFIP2,CCNG1,PPP3CA,BOK,DLGAP1,SENP2,ATP2B1,S1PR1,RBFOX1,APLN,ADORA1,ZMIZ2,RORA,NRXN1,PPP1R9A,LRRC32,PKNOX2,CDK16,ALOX12B,RBFOX3,SORT1,MAF,ERB…
GO:BP	apoptotic process	GO:0006915	1.94e-16	15.7117	1973	1390	194	27543	FBXW7,SMAD3,ATF6,GRIN2A,PRKCB,CALM1,OLFM1,SLC39A10,WNT4,WNT9A,BAP1,WFS1,ITPR1,CYFIP2,CCNG1,BOK,RASSF3,AIFM3,ADORA1,TYRO3,ARHGAP10,LIFR,GRIA4,SORT1,DKKL1,ERBB4,DAB2IP,KCNIP3,AKT2,PTN,GABRB2,DUSP1,MPL,CDK19,TFRC,RASSF2,HSPA1B,ADARB1,E030003E18RIK,MYO18A,ZBTB16,ACTN4,LRRK2,FBXO32,BRSK2,NET1,PRKCZ,MERTK,APBB1,PTK2,GRIN1,PLEKHO2,STXBP1,FZD3,HDAC4,FGFR3,IL12A,HTRA1,GRIK5,MAPK9,PTPRZ1,PDE5A,SYNGAP1,EXOG…
GO:BP	regulation of postsynaptic membrane potential	GO:0060078	2.02e-16	15.6956	154	1390	42	27543	GABRD,GRIN2A,KCNA1,DLG4,CUX2,ZMYND8,PPP3CA,GABRA1,ADORA1,CACNB3,RGS7,NRXN1,PPP1R9A,GRIA4,STX1B,SHANK1,GABRB2,RGS7BP,GLRB,SHANK3,LRRK2,PRKAR1B,PRKCZ,GRIN1,GABRG2,GRIK5,TBC1D24,BAIAP2,ADRB1,PCLO,RELN,IGSF9B,MPP2,IGSF11,UNC13B,SLC8A2,DGKI,GRIN2C,MEF2C,DRD4,BDNF,GRIK3
GO:BP	regulation of cellular component biogenesis	GO:0044087	2.51e-16	15.5996	988	1390	121	27543	SIPA1L1,GIT1,ASAP1,SMAD3,KCTD17,WNT4,PAK1,CUX2,GPM6B,ZMYND8,TRIM37,CYFIP2,LRTM2,S1PR1,FMN1,SYNDIG1,ARHGEF9,NRXN1,TBC1D30,PPP1R9A,SYNE1,DAB2IP,STX1B,SHANK1,SPTBN2,FARP1,TFRC,HSPA1B,PRRT2,PTPRD,DMTN,CLSTN1,EFNA5,SHANK3,SPTB,ARHGEF10L,ATMIN,LRRK2,LCAT,SACS,FAM107A,LMO4,PRKCZ,PIP4K2C,PTK2,FERMT2,GRIN1,STXBP1,HDAC4,NAV3,MAPK9,NEGR1,BAIAP2,TPM1,SWAP70,APC,FLRT2,SMPD3,NAPA,SRC,EPS8L2,PRKCE,PSRC1,TTBK1,N…
GO:BP	regulation of kinase activity	GO:0043549	3.48e-16	15.4583	748	1390	101	27543	FBXW7,CAMKK2,DGKZ,HEG1,DUSP7,DLG4,PAK1,CCNG1,ADORA1,LMTK2,TYRO3,NRXN1,PPP1R9A,ERBB4,CDK5R2,DAB2IP,INPPL1,INCENP,DUSP1,RASSF2,ADARB1,RASGRP1,LRRK2,ADAM9,LMO4,PRKAR1B,PRKCZ,PIP4K2C,MERTK,PTPRT,PTK2,FERMT2,ADRA2C,SRCIN1,FGFR3,HBEGF,PTPRB,PDE5A,ZFP91,APC,DAB1,PLEC,RELN,AGAP2,SRC,CDK5R1,HIPK3,TRIB1,PKIG,RANBP2,PSRC1,TTBK1,NTRK2,MAP3K14,ZFYVE28,DUSP3,EPHA8,EGR1,PIM1,HTT,MAS1,DLG1,MLLT1,PTPRJ,MAPK8IP1,N…
GO:BP	programmed cell death	GO:0012501	4.38e-16	15.3583	2031	1390	197	27543	FBXW7,SMAD3,ATF6,GRIN2A,PRKCB,CALM1,OLFM1,SLC39A10,WNT4,WNT9A,BAP1,WFS1,ITPR1,CYFIP2,CCNG1,BOK,RASSF3,AIFM3,ADORA1,TYRO3,ARHGAP10,LIFR,GRIA4,SORT1,DKKL1,ERBB4,DAB2IP,KCNIP3,AKT2,PTN,GABRB2,DUSP1,MPL,CDK19,TFRC,TMEM132A,RASSF2,HSPA1B,ADARB1,E030003E18RIK,MYO18A,ZBTB16,ACTN4,LRRK2,FBXO32,BRSK2,NET1,PRKCZ,MERTK,APBB1,PTK2,GRIN1,PLEKHO2,STXBP1,FZD3,HDAC4,FGFR3,IL12A,HTRA1,GRIK5,MAPK9,PTPRZ1,PDE5A,SYN…
GO:BP	regulation of synaptic plasticity	GO:0048167	7.74e-16	15.1111	362	1390	65	27543	MGLL,SIPA1L1,SNAP25,GRIN2A,RIMS3,SLC24A2,ATP2B2,DLG4,ARC,ADCY1,CHRDL1,ADORA1,ABHD6,PPP1R9A,CPLX2,PTN,MAP1A,PRRT2,JPH3,SHANK3,JPH4,NPTN,SYT12,ERC2,FAM107A,PRKAR1B,PRKCZ,GRIN1,STXBP1,SORCS3,PPFIA3,SYNGAP1,KCNJ10,BAIAP2,ADRB1,EGR2,RELN,CRTC1,NTRK2,GIPC1,ZDHHC2,UNC13A,PTGS2,EGR1,BRSK1,AKAP5,KCNN2,MPP2,IGSF11,SRF,UNC13B,CALB1,STAU2,SHANK2,SLC8A2,ATF4,HTR6,DGKI,GRIN2C,MEF2C,S100B,BDNF,LZTS1,NEURL1A,CRH
GO:BP	regulation of programmed cell death	GO:0043067	7.99e-16	15.0976	1629	1390	168	27543	FBXW7,SMAD3,ATF6,GRIN2A,CALM1,OLFM1,SLC39A10,WNT4,WNT9A,WFS1,ITPR1,CCNG1,BOK,RASSF3,ADORA1,TYRO3,ARHGAP10,LIFR,GRIA4,SORT1,DKKL1,ERBB4,DAB2IP,KCNIP3,AKT2,PTN,GABRB2,DUSP1,MPL,CDK19,TFRC,TMEM132A,RASSF2,HSPA1B,E030003E18RIK,MYO18A,ZBTB16,ACTN4,LRRK2,FBXO32,NET1,PRKCZ,MERTK,APBB1,PTK2,GRIN1,STXBP1,FZD3,HDAC4,IL12A,HTRA1,GRIK5,MAPK9,PTPRZ1,PDE5A,SYNGAP1,PRKCA,CNR1,FOXO3,PGR,PIN1,APC,ADRB1,TLE1,CXCL1…
GO:BP	synaptic vesicle exocytosis	GO:0016079	8.26e-16	15.0832	130	1390	38	27543	NRN1,GIT1,SNAP25,PRKCB,CALM1,RIMS3,ADCY1,CPLX2,STX1B,SPTBN2,PRRT2,SYT1,RIMS4,OTOF,LRRK2,SYT12,ERC2,STXBP1,CACNB4,GRIK5,APBA2,PPFIA3,CNR1,PCLO,NRXN3,NAPA,STXBP5L,PRKCE,CPLX1,GIPC1,UNC13A,CACNA1A,UNC13B,HTR1B,SLC4A8,DGKI,ADRA1A,DRD4
GO:BP	learning	GO:0007612	1.1e-15	14.9598	184	1390	45	27543	PLCB1,GIT1,SNAP25,GRIN2A,SLC24A2,ARC,NRXN1,SLC6A1,PTN,SHANK1,MAP1A,SPECC1,JPH3,SHANK3,JPH4,NPTN,PPP1R9B,SLC12A5,GRIN1,SORCS3,SYNGAP1,PDE8B,NRXN3,RELN,TBR1,NTRK2,PPP1R1B,PTGS2,BRSK1,HTT,B4GALT2,SRF,ATP1A2,CSMD1,SHANK2,SLC8A2,TANC1,HTR6,DGKI,ASIC1,CIC,DRD4,ABCC8,BDNF,CRH
GO:BP	regulation of protein metabolic process	GO:0051246	1.23e-15	14.9087	2631	1390	236	27543	ARPP19,PLCB1,FBXW7,CAMKK2,NOS1AP,SMAD3,PTPN3,GFRA2,GRIN2A,CD6,CALM1,SLC39A10,HEG1,WNT9A,DUSP7,TRPC6,DLG4,JDP2,PAK1,FGF9,WFS1,CYFIP2,CCNG1,BOK,DLGAP1,SENP2,ADORA1,NRXN1,PPP1R9A,ERBB4,CDK5R2,DAB2IP,AKT2,BMPER,INPPL1,PACSIN3,CRY2,MAP1A,INCENP,DUSP1,RNF144A,TFRC,RASSF2,HSPA1B,UBQLN4,CCDC88C,DMTN,CADM4,ADARB1,VGLL4,EFNA5,RASGRP1,RAMP3,SLC25A37,ZMIZ1,NPTN,LRRK2,CDK2AP1,PPP1R9B,FAM107A,ADAM9,HHATL,SIRPA…
GO:BP	regulation of apoptotic process	GO:0042981	1.45e-15	14.8379	1597	1390	165	27543	FBXW7,SMAD3,ATF6,GRIN2A,CALM1,OLFM1,SLC39A10,WNT4,WNT9A,WFS1,ITPR1,CCNG1,BOK,RASSF3,ADORA1,TYRO3,ARHGAP10,LIFR,GRIA4,SORT1,DKKL1,ERBB4,DAB2IP,KCNIP3,AKT2,PTN,GABRB2,DUSP1,MPL,CDK19,TFRC,RASSF2,HSPA1B,E030003E18RIK,MYO18A,ZBTB16,ACTN4,LRRK2,FBXO32,NET1,PRKCZ,MERTK,APBB1,PTK2,GRIN1,STXBP1,FZD3,HDAC4,IL12A,HTRA1,GRIK5,MAPK9,PTPRZ1,PDE5A,SYNGAP1,PRKCA,CNR1,FOXO3,PGR,PIN1,APC,ADRB1,TLE1,CXCL12,FRZB,AG…
GO:BP	regulation of transporter activity	GO:0032409	1.59e-15	14.7985	290	1390	57	27543	RPH3A,PLCB1,NOS1AP,PTPN3,GRIN2A,KCNC1,CALM1,KCNA1,TRPC6,DLG4,ARC,CACNB3,NRXN1,NETO2,MYO5A,SHANK1,JSRP1,JPH3,SHANK3,HOMER1,SCN1B,TESC,HECW1,CACNG2,CACNB4,ATP1B2,ADRB1,RELN,HCN1,ATP2A1,KCNJ11,STIM2,AHNAK,HECW2,CACNA1A,PIM1,HTT,DLG1,KCNS2,ATP1A2,RYR2,PCSK9,LRRC38,CACNA2D1,PPARGC1A,STAC3,CACNB1,ANK2,MEF2C,KCNAB1,AKAP6,ANK3,AMIGO1,DRD4,ABCC8,EDNRA,CRH
GO:BP	regulation of metal ion transport	GO:0010959	1.64e-15	14.7841	428	1390	71	27543	PLCB1,NOS1AP,PTPN3,KCNC1,CALM1,PLCB4,KCNA1,ATP2B2,TRPC6,WFS1,ITPR1,ATP1A1,ATP2B1,ADORA1,CACNB3,RGS7,NETO2,KCNIP3,AKT2,MYO5A,PACSIN3,JSRP1,RAMP3,JPH3,HOMER1,JPH4,SCN1B,TESC,GRIN1,HECW1,CACNB4,ATP1B2,HOMER2,ADRB1,CXCL12,ATP2A1,USP2,PRKCE,STIM2,AHNAK,PTGS2,HECW2,TMEM38A,CACNA1A,AKAP5,HTT,KCNN2,DLG1,OPRD1,MLLT6,KCNS2,ATP1A2,PER1,RYR2,PCSK9,LRRC38,PDPK1,CACNA2D1,AKT3,ATF4,STAC3,CACNB1,ANK2,KCNAB1,AKAP…
GO:BP	regulation of secretion by cell	GO:1903530	3e-15	14.5232	653	1390	91	27543	NRN1,GIT1,GRM2,SNAP25,PRKCB,KCNA2,CALM1,RIMS3,CACNA1I,ADCY1,PPP3CA,APLN,ADORA1,EXPH5,PPP1R9A,CDK16,CDK5R2,CPLX2,STX1B,MYO5A,OLFR78,RAPGEF4,MYRIP,CRY2,EFNA5,SYT1,RIMS4,MYO18A,LRRK2,SYT12,ADAM9,BRSK2,APBB1,SRCIN1,STXBP1,IL12A,CACNB4,MAPK9,APBA2,RAB15,CNR1,NR1D1,RASL10B,ADRB1,SMPD3,CXCL12,PDE8B,PCLO,NRXN3,PPARD,ARRB1,PPARG,STXBP5L,KCNJ11,PRKCE,NTRK2,CPLX1,GIPC1,SYT13,IL4RA,ACVR1C,UNC13A,CACNA1A,TRPM…
GO:BP	regulation of cell population proliferation	GO:0042127	3e-15	14.5225	1764	1390	176	27543	SMAD3,ZFP703,CD6,SLC39A10,WNT9A,BAP1,PAK1,FGF9,ITPR1,CRIP2,PPP3CA,BOK,S1PR1,APLN,ADORA1,IL11RA1,LIFR,LRRC32,ERBB4,DAB2IP,AKT2,INPPL1,PTN,GPR37L1,DUSP1,MPL,TFRC,SSBP3,HSPA1B,CLEC11A,CADM4,ADARB1,VGLL4,ZBTB16,TESC,ZMIZ1,LRRK2,PPP1R9B,PRKCZ,PTK2,FERMT2,FZD3,FGFRL1,HDAC4,FGFR3,IL12A,CACNB4,HTRA1,HBEGF,PTPRZ1,PDE5A,PRKCA,TPM1,FOXO3,PGR,NR1D1,PIN1,IER5,APC,NDRG2,SMPD3,CXCL12,FRZB,NEU1,AGAP2,PPARD,ARRB1…
GO:BP	vesicle-mediated transport	GO:0016192	3.39e-15	14.4703	1653	1390	168	27543	ENDOU,NRN1,GIT1,CUX1,SNAP25,CD6,PRKCB,CALM1,RIMS3,CACNA1I,DLG4,PACSIN1,ARC,ADCY1,PPP3CA,BSN,RIMS1,APLN,LMTK2,TYRO3,SYNDIG1,PIP5K1C,EXPH5,AP1S1,NRXN1,RAB6B,LYST,CDK16,SORT1,CDK5R2,CPLX2,STX1B,AKT2,MYO5A,IQSEC1,INPPL1,PACSIN3,RAPGEF4,SPIRE1,SPTBN2,ARF3,TFRC,PPP3R1,HSPA1B,PRRT2,DMTN,CLSTN1,SYT1,RASGRP1,RAMP3,SNPH,RIMS4,MYO18A,OTOF,ACTN4,LRRK2,SYT12,ERC2,RAB11FIP4,ACAP2,BRSK2,SIRPA,PRKAR1B,MERTK,PTK2…
GO:BP	localization within membrane	GO:0051668	3.58e-15	14.4464	678	1390	93	27543	GIT1,SNAP25,TTC7B,SORBS2,GRIN2A,CALM1,DLG4,PACSIN1,ZMYND8,CHRDL1,ADORA1,LMTK2,IQSEC2,ARHGEF9,CACNB3,NRXN1,DPP10,RILPL1,STX1B,KCNIP3,AKT2,MYO5A,PTN,RAPGEF4,JSRP1,DUSP18,DMTN,CLSTN1,ABHD17A,GLRB,RAMP3,GOLGA7B,SHANK3,TESC,PPP1R9B,TSPAN5,RAB11FIP4,ACAP2,PRKCZ,FERMT2,GRIN1,SGTB,STXBP1,TTC7,CACNG2,RAMP1,GRIK5,ANK1,TSPAN33,SYNGAP1,ZDHHC21,TUB,RELN,CDK5R1,ITGAL,KCNJ11,CPLX1,LRP4,ZDHHC2,MTCL1,CACNA1A,MAGI…
GO:BP	organic substance transport	GO:0071702	5.6e-15	14.2516	2466	1390	223	27543	RPH3A,FBXW7,ANO3,LY6E,GRM2,SNAP25,DIO2,PRKCB,KCNA2,STARD10,SLC13A5,SEC14L1,PITPNM2,FGF9,ARC,GPM6B,PPP3CA,SFXN5,SENP2,ZDHHC8,RIMS1,KIF5C,APLN,ADORA1,SLC25A23,LMTK2,ASTN2,SYNDIG1,EXPH5,AP1S1,CACNB3,RAB6B,SLC6A1,CDK16,SORT1,RILPL1,ERBB4,SLC16A6,STX1B,KCNIP3,SPCS3,AKT2,MYO5A,OLFR78,RAPGEF4,SPIRE1,MYRIP,OSBP2,CRY2,MAP1A,SLC1A3,ARF3,TFRC,PPP3R1,SLC23A3,DUSP18,DMTN,CLSTN1,EFNA5,SYT1,RAMP3,GOLGA7B,SLC25A…
GO:BP	tube development	GO:0035295	5.66e-15	14.2471	1157	1390	131	27543	FBXW7,SMAD3,PRKCB,WNT4,HEG1,PAK1,FGF9,PLXND1,S1PR1,APLN,FMN1,RORA,MAN2A1,NRXN1,DAB2IP,BMPER,PTN,MAN1A2,LUZP1,SSBP3,HEY1,PPP3R1,HSD11B1,SHANK3,EXT1,ZMIZ1,HES3,LMO4,NRCAM,PTK2,MYO1E,FZD3,IL12A,RAMP1,HBEGF,MIB1,PTPRB,MICAL2,PRKCA,PGR,HS6ST1,SMPD3,CXCL12,NRXN3,SHROOM3,SRC,RBPJ,PLXNA4,NTRK2,EPAS1,MAPK14,PTGS2,CEBPA,CLCN2,PLCD3,FOXP1,ITGAV,DLG1,SMOC2,PODXL,ENG,RBP4,ACVRL1,PTK7,NOTCH4,SRF,NCOR2,GLI3,ASC…
GO:BP	cytoskeleton organization	GO:0007010	5.96e-15	14.2247	1440	1390	152	27543	MAP6D1,TTL,STARD8,SIPA1L1,GIT1,NOS1AP,SMAD3,SORBS2,ARHGEF17,TUBA4A,WNT4,TTLL11,MEI1,PACSIN1,PAK1,ARC,GPM6B,MAST3,TRIM37,CYFIP2,S1PR1,FMN1,INF2,ARHGAP10,PHACTR1,PPP1R9A,MYO5C,MYO5A,IQSEC1,INPPL1,MYLK3,CNTNAP1,SHANK1,PACSIN3,SPIRE1,SPTBN2,MAP1A,FARP1,INCENP,HSPA1B,CCDC88C,ZNRF1,DMTN,EFNA5,SPECC1,SHANK3,MYO18A,SPTB,ARHGEF10L,ACTN4,PPP1R9B,FAM107A,TLE6,STRIP2,CAP2,BRSK2,SIRPA,PRKCZ,PTK2,FERMT2,SUN1,C…
GO:BP	protein localization to membrane	GO:0072657	6.14e-15	14.212	614	1390	87	27543	GIT1,SNAP25,TTC7B,SORBS2,GRIN2A,CALM1,DLG4,PACSIN1,ZMYND8,CHRDL1,ADORA1,IQSEC2,ARHGEF9,CACNB3,NRXN1,DPP10,RILPL1,STX1B,KCNIP3,AKT2,MYO5A,PTN,RAPGEF4,JSRP1,DUSP18,DMTN,CLSTN1,ABHD17A,GLRB,RAMP3,GOLGA7B,SHANK3,TESC,PPP1R9B,TSPAN5,PRKCZ,FERMT2,GRIN1,SGTB,STXBP1,TTC7,CACNG2,RAMP1,GRIK5,ANK1,TSPAN33,SYNGAP1,ZDHHC21,TUB,RELN,CDK5R1,ITGAL,KCNJ11,CPLX1,LRP4,ZDHHC2,MTCL1,CACNA1A,MAGI2,LRP1,AKAP5,DLG1,FAM1…
GO:BP	regulation of nervous system development	GO:0051960	8.43e-15	14.0744	527	1390	79	27543	LINGO1,TRPC6,BRINP1,CUX2,PLXND1,PPP3CA,LRTM2,RTN4R,SYNDIG1,MAN2A1,NRXN1,FSTL4,PTN,GPR37L1,PTPRD,CLSTN1,EFNA5,SHANK3,FBXO31,BHLHE40,NPTN,TLE6,HES3,PTK2,FZD3,PTPRZ1,LGI4,ZFP365,SYNGAP1,TBC1D24,BAIAP2,NR1D1,DAB1,FLRT2,EGR2,CXCL12,DIP2B,RELN,PPARG,CDK5R1,TRAK1,PLXNA4,NTRK2,LRP4,AKAP5,CDKL5,DLG1,NUMB,SRF,GLI3,SLITRK1,ASCL1,NTRK3,METRN,STAU2,SORL1,ARHGEF2,PLXNB1,QK,EGFR,TWF2,PTPRS,PTPRF,WNT7B,S100B,TNF…
GO:BP	exocytosis	GO:0006887	9.98e-15	14.001	390	1390	66	27543	NRN1,GIT1,SNAP25,PRKCB,CALM1,RIMS3,CACNA1I,ADCY1,RIMS1,PIP5K1C,EXPH5,CDK16,CDK5R2,CPLX2,STX1B,MYO5A,RAPGEF4,SPTBN2,PRRT2,DMTN,SYT1,RASGRP1,RIMS4,OTOF,LRRK2,SYT12,ERC2,BRSK2,STXBP1,CACNB4,GRIK5,APBA2,PPFIA3,SYTL1,RAB15,CNR1,SMPD3,PCLO,NRXN3,NAPA,STXBP5L,PRKCE,CPLX1,GIPC1,SYT13,IL4RA,UNC13A,CACNA1A,MYH10,RAB31,LGI3,UNC13B,DDI2,MICAL3,TRIM72,PDPK1,HTR1B,RAB3C,SLC4A8,DGKI,IL1RAPL1,ADRA1A,DRD4,SYK,NOT…
GO:BP	positive regulation of catalytic activity	GO:0043085	1.03e-14	13.9852	1126	1390	128	27543	FBXW7,CAMKK2,DGKZ,SIPA1L1,ASAP1,SMAD3,PDP1,CALM1,SLC39A10,WNT4,DLG4,PAK1,ADCY1,CYFIP2,BOK,RAP1GAP2,S1PR1,ADORA1,RTN4R,LMTK2,TYRO3,RGS7,NRXN1,TBC1D30,PPP1R9A,ARAP2,RASGEF1B,ERBB4,CDK5R2,RAPGEFL1,DAB2IP,AKT2,MYO5A,IQSEC1,RAPGEF4,ADAP1,INCENP,RASSF2,TBC1D22A,RASGRP1,LRRK2,PARM1,ADAM9,LMO4,NET1,PRKCZ,RASGEF1A,MERTK,PTK2,FERMT2,GRIN1,ADRA2C,SRCIN1,FGFR3,GARNL3,HBEGF,MAPK9,PDE5A,ZFP91,PIN1,DAB1,ADRB1,R…
GO:BP	memory	GO:0007613	1.08e-14	13.9678	162	1390	41	27543	PLCB1,SNAP25,GRIN2A,SLC24A2,BRINP1,CAMK4,ARC,ADCY1,CUX2,SLC6A1,PTN,SHANK1,MAP1A,JPH3,SHANK3,PRKCZ,GRIN1,SORCS3,PDE5A,CNR1,ADRB1,RELN,CRTC1,NTRK2,PPP1R1B,PTGS2,TRPM4,EGR1,KCNK2,B4GALT2,SRF,CALB1,CSMD1,SHANK2,SLC8A2,ASIC1,CIC,S100B,DRD4,ABCC8,BDNF
GO:BP	cellular chemical homeostasis	GO:0055082	1.41e-14	13.8493	704	1390	94	27543	KCTD17,PRKCB,CALM1,HKDC1,SLC39A10,SLC24A2,ATP2B2,TRPC6,WFS1,ITPR1,ATP1A1,PPP3CA,BOK,ATP2B1,ADORA1,SLC25A23,SLC30A4,CDK16,MYO5A,SLC1A3,JSRP1,MYH7B,TFRC,FOXK1,CLSTN1,EFNA5,JPH3,RYR1,TESC,NPTN,LRRK2,FOXK2,SLC12A5,BRSK2,PTK2,GRIN1,TTC7,SLC4A11,ATP1B2,GRIK5,SLC9A5,CKB,FOXO3,NR1D1,PDE8B,ATP2A1,PYGM,PPARD,ARRB1,KCNJ11,PRKCE,RAP1GDS1,STIM2,TMEM38A,CACNA1A,SLC4A4,TRPM4,HTT,ITGAV,SLC24A3,FZD9,SRF,ATP1A2,UN…
GO:BP	regulation of vesicle-mediated transport	GO:0060627	1.79e-14	13.7479	590	1390	84	27543	NRN1,GIT1,PRKCB,CALM1,RIMS3,CACNA1I,DLG4,PACSIN1,ARC,ADCY1,PPP3CA,BSN,APLN,PIP5K1C,EXPH5,NRXN1,CDK5R2,CPLX2,STX1B,AKT2,MYO5A,IQSEC1,PACSIN3,RAPGEF4,PPP3R1,PRRT2,SYT1,SNPH,RIMS4,MYO18A,ACTN4,LRRK2,SYT12,SIRPA,PRKAR1B,MERTK,PTK2,STXBP1,CACNB4,GRIK5,APBA2,MIB1,RAB15,CNR1,SMPD3,TUB,PCLO,NRXN3,ARRB1,SRC,PPARG,STXBP5L,CDK5R1,PRKCE,ANKRD13B,CPLX1,GIPC1,SYT13,IL4RA,ZDHHC2,CACNA1A,MAGI2,LRP1,AKAP5,ITGAV,N…
GO:BP	MAPK cascade	GO:0000165	1.99e-14	13.701	792	1390	101	27543	MAPK4,PLCB1,FBXW7,SMAD3,MAPK6,NLK,DUSP7,PAK1,FGF9,IGFBP4,ADORA1,NRXN1,ALOX12B,ERBB4,DAB2IP,BMPER,INPPL1,GPR37L1,DUSP1,ASH1L,RASSF2,ADRA1B,RASGRP1,RAMP3,SHANK3,NPTN,LRRK2,MAPK10,ADAM9,WWC1,SIRPA,PRKCZ,PTK2,FERMT2,ADRA2C,FGFR3,MAPK9,PDE5A,SYNGAP1,MAPK12,PIN1,NDRG2,CXCL12,ARRB1,SRC,HIPK3,MAP3K9,TRIB1,PRKCE,IGFBP6,NTRK2,MADD,TNFRSF19,MAP3K14,RB1CC1,MAPK14,PPM1L,DUSP3,EPHA8,DUSP6,KISS1,ITGAV,DLG1,PTPR…
GO:BP	heart development	GO:0007507	2.1e-14	13.6788	626	1390	87	27543	ZFPM1,LY6E,SMAD3,TNNC1,SORBS2,OLFM1,HEG1,FGF9,MYBPC3,PLXND1,SENP2,S1PR1,APLN,ERBB4,MYLK3,LUZP1,PPP3R1,VGLL4,RYR1,EXT1,ZMIZ1,LMO4,FGFRL1,MIB1,MICAL2,TPM1,PIN1,FLRT2,ADRB1,PLEC,PPARD,PPARG,RBPJ,DHRS3,PLXNA4,MEF2D,RPS6KA2,RB1CC1,MAPK14,SCX,DUSP6,MYH10,PIM1,KCNK2,FOXP1,MYOD1,ENG,RBP4,ACVRL1,PTK7,MYH7,SRF,NCOR2,GLI3,ASCL1,NTRK3,RYR2,IGF1R,SPRED1,PDLIM1,SOX6,PPARA,AXIN2,DVL3,ADRA1A,HOPX,ANK2,BCOR,MEF2C…
GO:BP	response to organonitrogen compound	GO:0010243	2.13e-14	13.6712	1189	1390	132	27543	PLCB1,GRM2,GRIN2A,KCNC1,PRKCB,CALM1,DLG4,WFS1,ITPR1,CCNG1,PPP3CA,ATP2B1,GABRA1,ADORA1,RGS7,SLC6A1,SORT1,AKT2,MYO5A,INPPL1,GABRB2,CRY2,SLC1A3,DMTN,GLRB,RAMP3,RYR1,HOMER1,EXT1,LRRK2,SLC1A2,PPP1R9B,KLF16,BRSK2,PRKCZ,PIP4K2C,PTK2,GRIN1,SGTB,CPEB2,GABRG2,BAIAP2,CNR1,FOXO3,HOMER2,PGR,APC,EGR2,SMPD3,CXCL12,ACTA1,HCN1,ATP2A1,PYGM,SRC,PPARG,KCNJ11,SDF2L1,CPEB4,PRKCE,NTRK2,PPP1R1B,ACVR1C,MAPK14,PTGS2,TMEM3…
GO:BP	regulation of transferase activity	GO:0051338	2.36e-14	13.627	868	1390	107	27543	FBXW7,CAMKK2,DGKZ,HEG1,DUSP7,DLG4,PAK1,CCNG1,BSN,ADORA1,LMTK2,TYRO3,NRXN1,PPP1R9A,ERBB4,CDK5R2,DAB2IP,INPPL1,INCENP,DUSP1,RASSF2,ADARB1,RASGRP1,LRRK2,PARM1,ADAM9,LMO4,PRKAR1B,PRKCZ,PIP4K2C,MERTK,PTPRT,PTK2,FERMT2,ADRA2C,SRCIN1,FGFR3,HBEGF,PTPRB,PDE5A,ZFP91,PIN1,APC,DAB1,PLEC,PCLO,RELN,AGAP2,SRC,PPARG,CDK5R1,HIPK3,TRIB1,PKIG,RANBP2,PSRC1,TTBK1,NTRK2,MAP3K14,ZFYVE28,DUSP3,EPHA8,EGR1,PIM1,HTT,MAS1,D…
GO:BP	cellular homeostasis	GO:0019725	2.37e-14	13.625	794	1390	101	27543	FBXW7,GIT1,KCTD17,PRKCB,CALM1,HKDC1,SLC39A10,SLC24A2,ATP2B2,TRPC6,BAP1,WFS1,ITPR1,ATP1A1,PPP3CA,BOK,ATP2B1,ADORA1,SLC25A23,TYRO3,SLC30A4,CDK16,MYO5A,MAP1A,SLC1A3,JSRP1,MYH7B,TFRC,FOXK1,CLSTN1,EFNA5,JPH3,SHANK3,RYR1,TESC,NPTN,LRRK2,FOXK2,SLC12A5,BRSK2,PTK2,GRIN1,TTC7,SLC4A11,ATP1B2,GRIK5,SLC9A5,CKB,FOXO3,NR1D1,PDE8B,ATP2A1,PYGM,PPARD,ARRB1,KCNJ11,PRKCE,NFE2L1,RAP1GDS1,STIM2,TMEM38A,CACNA1A,SLC4A4,…
GO:BP	negative regulation of cellular metabolic process	GO:0031324	2.98e-14	13.5258	2670	1390	234	27543	SCRT1,ARPP19,PLCB1,NFIC,GIT1,ZFPM1,SMAD3,PTPN3,KCTD1,GFRA2,ZFP703,WNT4,HEG1,WNT9A,RASD1,DUSP7,BAP1,JDP2,FGF9,WFS1,CUX2,ATP1A1,ZMYND8,TRIM37,PPP3CA,SENP2,MAF,DKKL1,DAB2IP,KCNIP3,AKT2,ZBTB18,INPPL1,CRY2,MAP1A,DUSP1,RASSF2,HEY1,HSPA1B,UBQLN4,CXXC5,FOXK1,DMTN,CADM4,ADARB1,VGLL4,POU6F1,ZBTB16,BHLHE40,LRRK2,PPP1R9B,FOXK2,TLE6,HHATL,KLF16,WWC1,HES3,SIRPA,PRKAR1B,HR,PRKCZ,PIP4K2C,APBB1,PTPRT,PTK2,CIPC,SR…
GO:BP	regulation of secretion	GO:0051046	3.29e-14	13.4834	737	1390	96	27543	NRN1,GIT1,GRM2,SNAP25,PRKCB,KCNA2,CALM1,RIMS3,CACNA1I,ADCY1,PPP3CA,APLN,ADORA1,EXPH5,PPP1R9A,SLC6A1,CDK16,ALOX12B,CDK5R2,CPLX2,STX1B,MYO5A,OLFR78,RAPGEF4,MYRIP,CRY2,EFNA5,SYT1,RIMS4,MYO18A,LRRK2,SYT12,ADAM9,BRSK2,APBB1,SRCIN1,STXBP1,IL12A,CACNB4,MAPK9,APBA2,RAB15,CNR1,NR1D1,RASL10B,ADRB1,SMPD3,CXCL12,PDE8B,PCLO,NRXN3,PPARD,ARRB1,PPARG,STXBP5L,KCNJ11,PRKCE,NTRK2,CPLX1,GIPC1,SYT13,IL4RA,ACVR1C,UNC1…
GO:BP	transmembrane receptor protein tyrosine kinase signaling pathway	GO:0007169	4.09e-14	13.3882	598	1390	84	27543	PLCB1,FBXW7,SIPA1L1,GIT1,GFRA2,PRKCB,WNT4,PAK1,FGF9,CYFIP2,IGFBP4,APLN,ADORA1,LMTK2,TYRO3,NRXN1,FSTL4,SORT1,ERBB4,DAB2IP,AKT2,INPPL1,RASSF2,CADM4,EFNA5,EXT1,NPTN,PRKCZ,PIP4K2C,MERTK,PTPRT,PTK2,MYO1E,FGFRL1,FGFR3,IL12A,HBEGF,APC,FLRT2,SMPD3,SRC,CDK5R1,RBPJ,IGFBP6,CSRNP1,NTRK2,ZFYVE28,MAPK14,DUSP3,ZBTB7B,EPHA8,SMOC2,PTPRJ,WASF1,SLC39A14,NTRK3,AXL,NRG3,IGF1R,SOCS3,TRIM72,SORL1,PDPK1,OSBPL8,SPRY2,PIK…
GO:BP	positive regulation of protein phosphorylation	GO:0001934	5.41e-14	13.2671	779	1390	99	27543	FBXW7,CAMKK2,CD6,TRPC6,DLG4,PAK1,FGF9,SENP2,ADORA1,NRXN1,PPP1R9A,ERBB4,CDK5R2,DAB2IP,AKT2,INCENP,TFRC,RASSF2,EFNA5,RASGRP1,RAMP3,NPTN,LRRK2,CDK2AP1,ADAM9,PRKCZ,PTK2,FERMT2,ADRA2C,SRCIN1,FGFR3,IL12A,HBEGF,MAPK9,PTPRZ1,PDE5A,ZFP91,PIN1,DAB1,RELN,AGAP2,ARRB1,SRC,CDK5R1,PSRC1,TTBK1,NTRK2,LRP4,MAP3K14,RB1CC1,PTGS2,EGR1,PIM1,AKAP5,MAS1,DLG1,OPRD1,ENG,ACVRL1,FNIP1,NTRK3,TNKS1BP1,STRADB,MAP3K10,KITL,CD44…
GO:BP	positive regulation of ion transport	GO:0043270	5.45e-14	13.2637	312	1390	57	27543	PLCB1,KCNC1,CALM1,KCNA1,ATP2B2,TRPC6,ARC,WFS1,ITPR1,ATP2B1,ADORA1,CACNB3,RGS7,SLC6A1,AKT2,MYO5A,SYT1,RAMP3,SHANK3,HOMER1,SCN1B,TESC,GRIN1,STXBP1,CACNG2,CACNB4,ATP1B2,MAPK9,ADRB1,CXCL12,RELN,HCN1,ATP2A1,KCNJ11,STIM2,AKAP5,HTT,KCNN2,DLG1,MLLT6,RYR2,LRRC38,PDPK1,CACNA2D1,AKT3,ATF4,STAC3,HTR6,ANK2,AKAP6,SLC38A3,ANK3,AMIGO1,DRD4,ABCC8,EDNRA,CRH
GO:BP	response to nitrogen compound	GO:1901698	6.2e-14	13.2073	1299	1390	139	27543	PLCB1,LY6E,GRM2,SORBS2,GRIN2A,KCNC1,PRKCB,CALM1,DLG4,WFS1,ITPR1,CCNG1,PPP3CA,ATP2B1,GABRA1,ADORA1,RGS7,SLC6A1,SORT1,AKT2,MYO5A,INPPL1,GABRB2,CRY2,SLC1A3,DMTN,GLRB,RAMP3,RYR1,HOMER1,EXT1,LRRK2,SLC1A2,PPP1R9B,KLF16,BRSK2,PRKCZ,PIP4K2C,PTK2,GRIN1,SGTB,KCNQ3,CPEB2,GABRG2,BAIAP2,CNR1,FOXO3,HOMER2,PGR,APC,EGR2,SMPD3,CXCL12,ACTA1,HCN1,ATP2A1,PYGM,SRC,PPARG,CDK5R1,KCNJ11,SDF2L1,CPEB4,PRKCE,NTRK2,PPP1R1B,…
GO:BP	ion homeostasis	GO:0050801	6.67e-14	13.1757	626	1390	86	27543	GRM2,KCTD17,PRKCB,CALM1,SLC39A10,KCNA1,SLC24A2,ATP2B2,TRPC6,WFS1,ITPR1,ATP1A1,BOK,ATP2B1,ADORA1,SLC25A23,SLC30A4,MYO5A,SLC1A3,JSRP1,MYH7B,TFRC,CLSTN1,JPH3,SLC25A37,RYR1,EXT1,TESC,GLS,NPTN,LRRK2,SLC12A5,PTK2,GRIN1,TTC7,SLC4A11,ATP1B2,ANK1,SLC9A5,CKB,KCNJ10,ATP2A1,PYGM,PRKCE,RAP1GDS1,STIM2,EPAS1,TMEM38A,CACNA1A,SLC4A4,HTT,ITGAV,SLC24A3,MLLT6,FZD9,ATP1A2,DDIT3,SLC39A14,CALB1,RYR2,PDPK1,SLC8A2,HTR1B,…
GO:BP	response to growth factor	GO:0070848	6.84e-14	13.165	721	1390	94	27543	GIT1,SMAD3,ZFP703,KCNC1,NLK,NBL1,PRKCB,WNT4,FGF9,CYFIP2,CHRDL1,APLN,LMTK2,NRXN1,LRRC32,SORT1,ERBB4,DAB2IP,BMPER,VASN,CADM4,EXT1,ZMIZ1,NPTN,PPP1R9B,ADAM9,ACAP2,PTK2,FERMT2,FGFRL1,FGFR3,IL12A,HTRA1,BAIAP2,FOXO3,PIN1,FLRT2,SMPD3,SRC,RNF165,RBPJ,PRKCE,NREP,RASL11B,NTRK2,GIPC1,ZBTB7A,ACVR1C,MAPK14,DUSP3,SCX,MAGI2,EGR1,DUSP6,WNT10A,SMOC2,OPRD1,ENG,WASF1,ACVRL1,PEG10,ASCL1,DDIT3,NTRK3,LRG1,IGF1R,SPRED1,…
GO:BP	regulation of anatomical structure size	GO:0090066	6.85e-14	13.1644	546	1390	79	27543	MGLL,TTL,OLFM1,ATP2B2,CYFIP2,RAP1GAP2,ATP2B1,APLN,ADORA1,FMN1,RTN4R,PPP1R9A,FSTL4,SPTBN2,DMTN,EFNA5,ADRA1B,SHANK3,SPTB,EXT1,LRRK2,SLC12A5,PTK2,DOCK4,ADRA2C,PDE5A,BAIAP2,TPM1,SWAP70,CIT,ADRB1,ZDHHC21,SMPD3,CXCL12,PCLO,DIP2B,PPARD,CDK5R1,PRKCE,RAP1GDS1,PLXNA4,SH3BP1,RB1CC1,PTGS2,ARHGAP42,TRPM4,CDKL5,DLG1,MTPN,SRF,ATP1A2,ARHGAP35,NTRK3,PRR16,AKT3,HTR1B,PIK3R2,ADRA1A,AQP4,CDHR2,EGFR,EDNRB,TWF2,PTPRS,…
GO:BP	regulation of cation transmembrane transport	GO:1904062	8.06e-14	13.0938	385	1390	64	27543	RPH3A,PLCB1,NOS1AP,PTPN3,GRIN2A,KCNC1,CALM1,KCNA1,DLG4,ARC,CACNB3,RGS7,NRXN1,NETO2,KCNIP3,MYO5A,SHANK1,JSRP1,RAMP3,JPH3,SHANK3,HOMER1,SCN1B,TESC,GRIN1,HECW1,CACNG2,CACNB4,ATP1B2,ADRB1,RELN,HCN1,ATP2A1,KCNJ11,PRKCE,STIM2,AHNAK,HECW2,TMEM38A,CACNA1A,AKAP5,HTT,KCNN2,DLG1,KCNS2,ATP1A2,RYR2,PCSK9,LRRC38,PDPK1,CACNA2D1,PPARGC1A,STAC3,CACNB1,ANK2,MEF2C,KCNAB1,AKAP6,ANK3,AMIGO1,DRD4,ABCC8,EDNRA,CRH
GO:BP	negative regulation of nitrogen compound metabolic process	GO:0051172	8.14e-14	13.0894	2539	1390	224	27543	SCRT1,ARPP19,PLCB1,NFIC,GIT1,ZFPM1,SMAD3,PTPN3,KCTD1,GFRA2,ZFP703,GRIN2A,WNT4,HEG1,WNT9A,RASD1,DUSP7,BAP1,JDP2,FGF9,WFS1,CUX2,ZMYND8,TRIM37,PPP3CA,SENP2,MAF,DAB2IP,KCNIP3,AKT2,ZBTB18,INPPL1,CRY2,MAP1A,DUSP1,RASSF2,HEY1,HSPA1B,UBQLN4,CXXC5,FOXK1,DMTN,CADM4,ADARB1,VGLL4,POU6F1,ZBTB16,BHLHE40,LRRK2,PPP1R9B,FOXK2,TLE6,HHATL,KLF16,WWC1,HES3,SIRPA,PRKAR1B,HR,PRKCZ,APBB1,PTPRT,CIPC,SRCIN1,SCRT2,CPEB2,HD…
GO:BP	response to hormone	GO:0009725	1.15e-13	12.9404	951	1390	112	27543	PLCB1,PRKCB,CALM1,PAK1,ATP1A1,ATP2B1,SORT1,AKT2,MYO5A,INPPL1,OLFR78,CRY2,NR3C1,PAQR8,EFNA5,RAMP3,ZMIZ1,LCAT,PPP1R9B,FAM107A,ADAM9,FBXO32,PRKCZ,PIP4K2C,PTK2,CTNNA2,CPEB2,HDAC4,RAMP1,ESRRG,FOXO3,PGR,NR1D1,APC,ESRRB,EGR2,CXCL12,ACTA1,ATP2A1,PPARD,SRC,PPARG,CITED4,PRKCE,NTRK2,ZBTB7A,ACVR1C,ABHD2,MAPK14,PTGS2,ESRRA,ZBTB7B,EPHA8,EGR1,MAS1,FOXP1,LMO2,GAS2L1,MYOD1,RAB31,ENG,CYP11A1,RBP4,SRF,NCOR2,ATP1A2,…
GO:BP	cellular protein localization	GO:0034613	1.31e-13	12.8818	1717	1390	168	27543	RPH3A,FBXW7,GIT1,SNAP25,TTC7B,SORBS2,GRIN2A,CALM1,KCNA1,DLG4,PACSIN1,FGF9,GPM6B,ZMYND8,PPP3CA,CHRDL1,RIMS1,KIF5C,ADORA1,ASTN2,SYNDIG1,EXPH5,IQSEC2,ARHGEF9,AP1S1,CACNB3,NRXN1,DPP10,RAB6B,SORT1,RILPL1,ERBB4,SYNE1,STX1B,KCNIP3,SPCS3,AKT2,MYO5A,PTN,CNTNAP1,RAPGEF4,MYRIP,CRY2,MAP1A,ARF3,JSRP1,TFRC,PPP3R1,DUSP18,DMTN,CLSTN1,ABHD17A,GLRB,RAMP3,GOLGA7B,SHANK3,ZBTB16,TESC,LRRK2,PPP1R9B,TSPAN5,PRKCZ,FERMT2…
GO:BP	regulated exocytosis	GO:0045055	1.37e-13	12.8647	270	1390	52	27543	NRN1,GIT1,SNAP25,PRKCB,CALM1,RIMS3,CACNA1I,ADCY1,RIMS1,CDK5R2,CPLX2,STX1B,RAPGEF4,SPTBN2,PRRT2,DMTN,SYT1,RASGRP1,RIMS4,OTOF,LRRK2,SYT12,ERC2,STXBP1,CACNB4,GRIK5,APBA2,PPFIA3,RAB15,CNR1,PCLO,NRXN3,NAPA,STXBP5L,PRKCE,CPLX1,GIPC1,SYT13,IL4RA,UNC13A,CACNA1A,RAB31,UNC13B,PDPK1,HTR1B,SLC4A8,DGKI,ADRA1A,DRD4,SYK,NOTCH1,MYH9
GO:BP	muscle tissue development	GO:0060537	1.45e-13	12.8398	464	1390	71	27543	ZFPM1,LY6E,SMAD3,TNNC1,SORBS2,HEG1,FGF9,MYBPC3,PPP3CA,S1PR1,RBFOX1,ERBB4,ZBTB18,MYLK3,CNTNAP1,VGLL4,RYR1,HOMER1,PLAGL1,HDAC4,TPM1,PIN1,ADRB1,PLEC,EGR2,ACTA1,RBPJ,USP2,MEF2D,MAPK14,SCX,EGR1,MYH10,PIM1,KCNK2,FOXP1,DLG1,MYOD1,ENG,RBP4,MYH7,SRF,HIVEP3,MBNL1,CSRP1,RYR2,PPARGC1A,SOX6,PPARA,STAC3,ADRA1A,MEF2C,MED1,AKAP6,KLHL40,XK,S100B,MAPK11,NR1D2,YAP1,SCHIP1,SOX9,EPHB1,BMP2,BDNF,NEURL1A,FHL2,NOTCH1,AL…
GO:BP	regulation of neurogenesis	GO:0050767	1.71e-13	12.7678	433	1390	68	27543	LINGO1,TRPC6,BRINP1,CUX2,PLXND1,PPP3CA,RTN4R,MAN2A1,FSTL4,PTN,GPR37L1,PTPRD,EFNA5,SHANK3,FBXO31,BHLHE40,NPTN,TLE6,HES3,PTK2,FZD3,PTPRZ1,ZFP365,SYNGAP1,TBC1D24,BAIAP2,NR1D1,DAB1,EGR2,CXCL12,DIP2B,RELN,PPARG,CDK5R1,TRAK1,PLXNA4,NTRK2,LRP4,AKAP5,CDKL5,NUMB,SRF,GLI3,SLITRK1,ASCL1,NTRK3,METRN,STAU2,SORL1,ARHGEF2,PLXNB1,QK,EGFR,TWF2,PTPRS,PTPRF,WNT7B,TNFRSF12A,SEMA3G,AMIGO1,SLIT2,YAP1,ABCC8,DSCAM,BMP2,…
GO:BP	positive regulation of cell projection organization	GO:0031346	1.85e-13	12.7317	423	1390	67	27543	KCTD17,DLG4,PACSIN1,ITPR1,CUX2,ZMYND8,PLXND1,PPP1R9A,FUT9,DAB2IP,PTN,PTPRD,EFNA5,FBXO31,SCN1B,ATMIN,NPTN,ACSL6,APBB1,GRIN1,HDAC4,ATP1B2,NEGR1,PTPRZ1,TBC1D24,BAIAP2,CNR1,APC,SERPINI1,CXCL12,RELN,NEU1,SRC,EPS8L2,TRAK1,CRTC1,PLXNA4,NTRK2,MARK2,MAGI2,AKAP5,CDKL5,HTT,NUMB,PTK7,SRF,SLITRK1,ARHGAP35,NTRK3,METRN,STAU2,IGF1R,PLXNB1,AUTS2,QK,TWF2,CBFA2T2,FSCN1,PTPRF,ADAMTS1,BRK1,TNFRSF12A,AMIGO1,DSCAM,BDNF…
GO:BP	regulation of cell adhesion	GO:0030155	1.94e-13	12.7124	757	1390	96	27543	SMAD3,ZFP703,CD6,WNT4,CHST2,GPM6B,PLXND1,PPP3CA,S1PR1,FMN1,LRRC32,FUT9,PTN,DUSP1,TFRC,DMTN,EFNA5,RASGRP1,ZBTB16,TESC,ACTN4,ZMIZ1,FAM107A,ADAM9,SIRPA,PRKCZ,PTK2,FERMT2,FCHO1,IL12A,PTPRZ1,PDE5A,PRKCA,TPM1,FOXO3,SWAP70,DAB1,ZDHHC21,SERPINI1,CXCL12,SRC,RBPJ,ITGAL,PRKCE,PLXNA4,DMP1,CELSR2,IL4RA,ZDHHC2,MAPK14,DUSP3,ZBTB7B,EPHA8,CORO2B,PREX1,MAGI2,LAMA3,ITGAV,DLG1,SMOC2,PODXL,PTPRJ,ACVRL1,ZBTB1,NOTCH4,S…
GO:BP	cellular macromolecule localization	GO:0070727	2.03e-13	12.6915	1725	1390	168	27543	RPH3A,FBXW7,GIT1,SNAP25,TTC7B,SORBS2,GRIN2A,CALM1,KCNA1,DLG4,PACSIN1,FGF9,GPM6B,ZMYND8,PPP3CA,CHRDL1,RIMS1,KIF5C,ADORA1,ASTN2,SYNDIG1,EXPH5,IQSEC2,ARHGEF9,AP1S1,CACNB3,NRXN1,DPP10,RAB6B,SORT1,RILPL1,ERBB4,SYNE1,STX1B,KCNIP3,SPCS3,AKT2,MYO5A,PTN,CNTNAP1,RAPGEF4,MYRIP,CRY2,MAP1A,ARF3,JSRP1,TFRC,PPP3R1,DUSP18,DMTN,CLSTN1,ABHD17A,GLRB,RAMP3,GOLGA7B,SHANK3,ZBTB16,TESC,LRRK2,PPP1R9B,TSPAN5,PRKCZ,FERMT2…
GO:BP	regulation of cellular protein metabolic process	GO:0032268	2.4e-13	12.6194	2456	1390	217	27543	ARPP19,FBXW7,CAMKK2,NOS1AP,SMAD3,PTPN3,GFRA2,CD6,CALM1,SLC39A10,HEG1,WNT9A,DUSP7,TRPC6,DLG4,JDP2,PAK1,FGF9,WFS1,CYFIP2,CCNG1,BOK,DLGAP1,SENP2,ADORA1,NRXN1,PPP1R9A,ERBB4,CDK5R2,DAB2IP,AKT2,BMPER,INPPL1,PACSIN3,CRY2,MAP1A,INCENP,DUSP1,RNF144A,TFRC,RASSF2,HSPA1B,UBQLN4,CCDC88C,DMTN,CADM4,ADARB1,VGLL4,EFNA5,RASGRP1,RAMP3,ZMIZ1,NPTN,LRRK2,CDK2AP1,PPP1R9B,FAM107A,ADAM9,HHATL,SIRPA,PRKAR1B,PRKCZ,PTPRT,P…
GO:BP	synaptic transmission, glutamatergic	GO:0035249	2.52e-13	12.5983	107	1390	32	27543	DGKZ,GRM2,GRIN2A,ADORA1,NRXN1,GRIA4,MYO5A,SYT1,SHANK3,HOMER1,EXT1,LRRK2,GRIN1,STXBP1,CACNG2,CACNB4,GRIK5,CNR1,RELN,HCN1,NAPA,NTRK2,UNC13A,PTGS2,CACNA1A,UNC13B,SHANK2,HTR1B,DGKI,MEF2C,EGFR,GRIK3
GO:BP	response to stress	GO:0006950	3.21e-13	12.493	3942	1390	310	27543	MGLL,PLCB1,FBXW7,DGKZ,GIT1,SMAD3,ZNFX1,ATF6,GRIN2A,DIO2,CD6,ARPP21,WNT4,TRPC6,SEC14L1,BAP1,CAMTA2,PAK1,CHST2,HERC6,BRINP1,WFS1,ADCY1,ITPR1,CCNG1,PPP3CA,BOK,ATP2B1,IGFBP4,ACKR1,ADORA1,SLC25A23,RTN4R,TYRO3,PIP5K1C,RORA,RGS7,LYST,GNL1,DAB2IP,KCNIP3,MYO5A,MYLK3,PTN,VASN,SPIRE1,SLC1A3,GPR37L1,DUSP1,MPL,DAGLB,CDK19,TFRC,ASH1L,RASSF2,HSPA1B,RTN4RL1,UBQLN4,CINP,FOXK1,CCDC88C,DMTN,CADM4,RASGRP1,E030003E18…
GO:BP	positive regulation of protein modification process	GO:0031401	3.29e-13	12.4829	1043	1390	118	27543	FBXW7,CAMKK2,NOS1AP,CD6,CALM1,SLC39A10,TRPC6,DLG4,JDP2,PAK1,FGF9,WFS1,SENP2,ADORA1,NRXN1,PPP1R9A,ERBB4,CDK5R2,DAB2IP,AKT2,INCENP,TFRC,RASSF2,EFNA5,RASGRP1,RAMP3,NPTN,LRRK2,CDK2AP1,FAM107A,ADAM9,PRKCZ,PTK2,FERMT2,ADRA2C,SRCIN1,HDAC4,FGFR3,IL12A,RAMP1,HBEGF,MAPK9,PTPRZ1,PDE5A,ZFP91,PIN1,DAB1,MGAT4B,DIP2B,RELN,AGAP2,ARRB1,SRC,CDK5R1,TRIB1,PSRC1,TTBK1,FBXO33,NTRK2,TSPYL5,LRP4,MAP3K14,RB1CC1,PTGS2,ZBT…
GO:BP	actin filament organization	GO:0007015	3.58e-13	12.4455	450	1390	69	27543	SMAD3,SORBS2,WNT4,PACSIN1,PAK1,CYFIP2,S1PR1,FMN1,PHACTR1,PPP1R9A,MYO5C,MYO5A,INPPL1,SHANK1,SPIRE1,SPTBN2,DMTN,SHANK3,SPTB,ARHGEF10L,ACTN4,PPP1R9B,FAM107A,TLE6,SIRPA,FERMT2,CTNNA2,MYO1E,MICAL2,BAIAP2,TPM1,SWAP70,CIT,PLEC,ACTA1,ARRB1,SRC,PRKCE,SH3BP1,CORO2B,MYH10,DLG1,MTPN,GAS2L1,ACTN1,WASF1,SRF,FAM171A1,ARHGAP35,MICAL3,PDLIM1,ARHGEF2,MYO1B,ROCK2,PIK3R2,HMCN1,TRIOBP,TWF2,FSCN1,ESPNL,MPRIP,BRK1,ADD2…
GO:BP	regulation of nervous system process	GO:0031644	3.7e-13	12.4318	186	1390	42	27543	MGLL,GRIN2A,DLG4,CUX2,ZMYND8,DLGAP3,DLGAP1,ADORA1,CACNB3,NRXN1,STX1B,SHANK1,RAPGEF4,SHANK3,HOMER1,LRRK2,PRKAR1B,PRKCZ,GRIN1,ADRA2C,CACNG2,TBC1D24,KCNJ10,BAIAP2,EGR2,PCLO,RELN,IGSF9B,SRC,IGSF11,OPRD1,UNC13B,FMR1,SLC8A2,DLGAP4,EDNRB,S100B,NPTX1,JAM2,DRD4,ZFHX2,HGF
GO:BP	response to oxygen-containing compound	GO:1901700	3.73e-13	12.428	2014	1390	187	27543	PLCB1,GIT1,LY6E,GRM2,ZFP703,SORBS2,GRIN2A,DIO2,CD6,PRKCB,CALM1,TRPC6,DLG4,BRINP1,ADCY1,ITPR1,PPP3CA,ATP2B1,RORA,RGS7,SLC6A1,CDK16,SORT1,SMARCD1,DAB2IP,AKT2,MYO5A,INPPL1,OLFR78,BRINP2,CRY2,SLC1A3,GPR37L1,CDK19,TFRC,DMTN,EFNA5,GLRB,E030003E18RIK,RAMP3,RYR1,HOMER1,EXT1,TESC,LRRK2,SLC1A2,PPP1R9B,ADAM9,FBXO32,KLF16,BRSK2,SIRPA,NET1,PRKCZ,PIP4K2C,PTK2,GRIN1,CPEB2,STXBP1,RASAL2,IL12A,GRIK5,MAPK9,PRKCA,B…
GO:BP	cellular response to growth factor stimulus	GO:0071363	4.24e-13	12.3722	693	1390	90	27543	GIT1,SMAD3,ZFP703,NLK,NBL1,PRKCB,WNT4,FGF9,CYFIP2,CHRDL1,APLN,LMTK2,NRXN1,LRRC32,SORT1,ERBB4,DAB2IP,BMPER,VASN,CADM4,EXT1,ZMIZ1,NPTN,PPP1R9B,ADAM9,ACAP2,PTK2,FERMT2,FGFRL1,FGFR3,IL12A,HTRA1,BAIAP2,FOXO3,PIN1,FLRT2,SMPD3,SRC,RNF165,RBPJ,PRKCE,NREP,RASL11B,NTRK2,GIPC1,ZBTB7A,ACVR1C,MAPK14,DUSP3,SCX,MAGI2,EGR1,WNT10A,SMOC2,OPRD1,ENG,WASF1,ACVRL1,PEG10,NTRK3,LRG1,IGF1R,SPRED1,CD44,SORL1,SNW1,PDPK1,SO…
GO:BP	canonical Wnt signaling pathway	GO:0060070	4.71e-13	12.3271	297	1390	54	27543	SMAD3,ZFP703,WNT4,WNT9A,FGF9,LYPD6,DKKL1,DAB2IP,CCDC88C,EXT1,LRRK2,CTNND2,TLE6,DACT3,CSNK1G2,FZD3,PLEKHA4,FOXO3,PIN1,APC,TLE1,FRZB,SRC,RBPJ,FAM53B,LRP4,MAPK14,TMEM198,TBL1XR1,TRPM4,EGR1,WNT10A,NKD1,PTK7,FZD9,GLI3,DDIT3,TLE3,LGR4,TMEM170B,AXIN2,RSPO2,DVL3,CTHRC1,EGFR,EDNRB,WNT7B,FZD10,WWTR1,YAP1,SOX9,BMP2,NOTCH1,EDNRA
GO:BP	negative regulation of cellular component organization	GO:0051129	5.51e-13	12.2591	708	1390	91	27543	MAP6D1,TRPC6,DLG4,PACSIN1,TRIM37,PPP3CA,BOK,RAP1GAP2,S1PR1,RTN4R,NRXN1,TBC1D30,PPP1R9A,FSTL4,STX1B,INPPL1,PTN,SHANK1,PACSIN3,SPTBN2,MAP1A,DUSP1,TFRC,HSPA1B,PRRT2,RTN4RL1,UBQLN4,NTM,DMTN,SNPH,SHANK3,SPTB,LRRK2,SACS,FAM107A,LMO4,PRKCZ,PTK2,CTNNA2,STXBP1,NAV3,PTPRZ1,ZFP365,SYNGAP1,TPM1,SWAP70,APC,DAB1,DIP2B,CLEC16A,SRC,CDK5R1,FAT3,TOM1L2,ANKRD13B,LRP4,RPS6KA2,CORO2B,ITGAV,MTPN,GAS2L1,TMEM14A,OPRD1,A…
GO:BP	postsynaptic specialization organization	GO:0099084	7.08e-13	12.1499	54	1390	23	27543	DGKZ,SIPA1L1,GIT1,DLG4,ZMYND8,DLGAP1,ARHGEF9,NRXN1,CNTNAP1,SHANK1,PTPRD,SHANK3,SYNGAP1,RELN,NTNG2,MAGI2,MPP2,DLG1,NUMB,NTRK3,SHANK2,PTPRS,NPTX1
GO:BP	protein localization to synapse	GO:0035418	8.75e-13	12.0578	84	1390	28	27543	GIT1,SNAP25,GRIN2A,DLG4,BSN,DLGAP1,KIF5C,IQSEC2,NRXN1,STX1B,SHANK1,RAPGEF4,MAP1A,CLSTN1,HOMER1,PRKCZ,GRIN1,CACNG2,BAIAP2,PCLO,RELN,CPLX1,ZDHHC2,MAGI2,DLG1,ADAM22,GRIN2C,NPTX1
GO:BP	positive regulation of intracellular signal transduction	GO:1902533	1.34e-12	11.8738	984	1390	112	27543	PLCB1,FBXW7,PRKCB,PAK1,FGF9,BOK,IGFBP4,ADORA1,RTN4R,NRXN1,ALOX12B,ERBB4,DAB2IP,BMPER,OLFR78,GPR37L1,TFRC,RASSF2,HSPA1B,ADRA1B,RASGRP1,RAMP3,ACTN4,NPTN,LRRK2,ADAM9,WWC1,NET1,PRKCZ,RASGEF1A,PTK2,FERMT2,ADRA2C,FGFR3,HBEGF,PDE5A,SMPD3,CXCL12,RELN,AGAP2,PPARD,ARRB1,CLEC16A,SRC,ITGAL,PRKCE,IGFBP6,NTRK2,MADD,TSPYL5,TNFRSF19,MAP3K14,RB1CC1,EPHA8,KISS1,AKAP5,ITGAV,ENG,PTPRJ,FNIP1,MAPK8IP1,NACC2,DDIT3,NTRK…
GO:BP	regulation of neurotransmitter secretion	GO:0046928	1.34e-12	11.8719	120	1390	33	27543	NRN1,GIT1,PRKCB,CALM1,RIMS3,ADCY1,PPP1R9A,CPLX2,STX1B,SYT1,RIMS4,LRRK2,SYT12,STXBP1,CACNB4,APBA2,CNR1,NRXN3,STXBP5L,PRKCE,NTRK2,CPLX1,GIPC1,UNC13A,CACNA1A,HTR1B,HTR6,SLC4A8,DGKI,ADRA1A,ASIC1,MEF2C,DRD4
GO:BP	chemical synaptic transmission, postsynaptic	GO:0099565	1.76e-12	11.7549	121	1390	33	27543	GRIN2A,DLG4,CUX2,ZMYND8,PPP3CA,ADORA1,CACNB3,NRXN1,PPP1R9A,STX1B,SHANK1,GLRB,SHANK3,LRRK2,PRKAR1B,PRKCZ,GRIN1,GRIK5,TBC1D24,BAIAP2,ADRB1,PCLO,RELN,IGSF9B,MPP2,IGSF11,UNC13B,SLC8A2,DGKI,GRIN2C,MEF2C,DRD4,BDNF
GO:BP	cation homeostasis	GO:0055080	1.92e-12	11.7168	602	1390	81	27543	KCTD17,PRKCB,CALM1,SLC39A10,KCNA1,SLC24A2,ATP2B2,TRPC6,WFS1,ITPR1,ATP1A1,BOK,ATP2B1,ADORA1,SLC25A23,SLC30A4,MYO5A,SLC1A3,JSRP1,MYH7B,TFRC,CLSTN1,JPH3,SLC25A37,RYR1,EXT1,TESC,NPTN,LRRK2,SLC12A5,GRIN1,TTC7,SLC4A11,ATP1B2,ANK1,SLC9A5,KCNJ10,ATP2A1,PYGM,PRKCE,RAP1GDS1,STIM2,EPAS1,TMEM38A,CACNA1A,SLC4A4,HTT,ITGAV,SLC24A3,MLLT6,FZD9,ATP1A2,DDIT3,SLC39A14,CALB1,RYR2,PDPK1,SLC8A2,HTR1B,ATF4,SCNN1A,SLC4A8…
GO:BP	inorganic ion homeostasis	GO:0098771	1.95e-12	11.7089	614	1390	82	27543	KCTD17,PRKCB,CALM1,SLC39A10,KCNA1,SLC24A2,ATP2B2,TRPC6,WFS1,ITPR1,ATP1A1,BOK,ATP2B1,ADORA1,SLC25A23,SLC30A4,MYO5A,SLC1A3,JSRP1,MYH7B,TFRC,CLSTN1,JPH3,SLC25A37,RYR1,EXT1,TESC,NPTN,LRRK2,SLC12A5,PTK2,GRIN1,TTC7,ATP1B2,ANK1,SLC9A5,CKB,KCNJ10,ATP2A1,PYGM,PRKCE,RAP1GDS1,STIM2,EPAS1,TMEM38A,CACNA1A,SLC4A4,HTT,ITGAV,SLC24A3,MLLT6,FZD9,ATP1A2,DDIT3,SLC39A14,CALB1,RYR2,PDPK1,SLC8A2,HTR1B,ATF4,SCNN1A,SLC4A…
GO:BP	regulation of protein kinase activity	GO:0045859	2.88e-12	11.5406	642	1390	84	27543	FBXW7,CAMKK2,HEG1,DUSP7,DLG4,PAK1,CCNG1,ADORA1,NRXN1,PPP1R9A,CDK5R2,DAB2IP,INPPL1,INCENP,DUSP1,RASSF2,ADARB1,RASGRP1,LRRK2,ADAM9,PRKAR1B,PRKCZ,PTPRT,PTK2,FERMT2,ADRA2C,SRCIN1,HBEGF,PTPRB,PDE5A,ZFP91,APC,DAB1,PLEC,RELN,AGAP2,SRC,CDK5R1,HIPK3,TRIB1,PKIG,PSRC1,TTBK1,MAP3K14,ZFYVE28,DUSP3,EGR1,PIM1,HTT,MAS1,DLG1,MLLT1,PTPRJ,MAPK8IP1,NTRK3,SPRED1,STRADB,MAP3K10,KITL,SORL1,PDPK1,OSBPL8,SPRY2,SLC8A2,AXI…
GO:BP	protein localization to cell junction	GO:1902414	3.36e-12	11.4737	116	1390	32	27543	GIT1,SNAP25,GRIN2A,HEG1,DLG4,BSN,DLGAP1,KIF5C,IQSEC2,NRXN1,STX1B,SHANK1,RAPGEF4,MAP1A,CLSTN1,HOMER1,ACTN4,PRKCZ,FERMT2,GRIN1,CACNG2,MAPK9,BAIAP2,PCLO,RELN,CPLX1,ZDHHC2,MAGI2,DLG1,ADAM22,GRIN2C,NPTX1
GO:BP	positive regulation of kinase activity	GO:0033674	3.78e-12	11.4229	482	1390	70	27543	FBXW7,CAMKK2,DGKZ,DLG4,PAK1,ADORA1,LMTK2,TYRO3,NRXN1,PPP1R9A,ERBB4,CDK5R2,DAB2IP,INCENP,RASSF2,RASGRP1,LRRK2,ADAM9,LMO4,PRKCZ,MERTK,PTK2,FERMT2,ADRA2C,SRCIN1,FGFR3,HBEGF,PDE5A,ZFP91,DAB1,RELN,AGAP2,SRC,CDK5R1,RANBP2,PSRC1,TTBK1,NTRK2,MAP3K14,EPHA8,EGR1,PIM1,MAS1,DLG1,NTRK3,AXL,STRADB,MAP3K10,KITL,PDPK1,OSBPL8,SPRY2,SLC8A2,AXIN2,DVL3,ADRA1A,MEF2C,EGFR,AKAP6,FZD10,FAM20A,DRD4,CDC25B,EPHB1,VAV3,BMP2…
GO:BP	cellular response to hormone stimulus	GO:0032870	3.78e-12	11.4224	633	1390	83	27543	PLCB1,PRKCB,PAK1,ATP1A1,ATP2B1,AKT2,MYO5A,INPPL1,OLFR78,CRY2,NR3C1,PAQR8,EFNA5,RAMP3,ZMIZ1,FAM107A,FBXO32,PRKCZ,PIP4K2C,PTK2,CPEB2,HDAC4,RAMP1,ESRRG,FOXO3,PGR,NR1D1,APC,ESRRB,PPARD,SRC,PPARG,PRKCE,NTRK2,ZBTB7A,ABHD2,ESRRA,ZBTB7B,EPHA8,MAS1,FOXP1,LMO2,GAS2L1,MYOD1,RAB31,CYP11A1,NCOR2,ATP1A2,KLF9,PER1,SLC39A14,GPT,EPHX1,IGF1R,SOCS3,PCSK9,TRIM72,SORL1,PDPK1,GPAM,OSBPL8,PPARGC1A,AKT3,PPARA,PIK3R2,MEF…
GO:BP	dendritic spine development	GO:0060996	3.88e-12	11.4117	124	1390	33	27543	SIPA1L1,GIT1,LZTS3,ASAP1,MAPK6,DLG4,ARC,CUX2,ZMYND8,PPP1R9A,FSTL4,IQSEC1,SHANK1,SPIRE1,SHANK3,LRRK2,CTNND2,SLC12A5,SRCIN1,ZFP365,BAIAP2,RELN,CDK5R1,CDKL5,SDK1,STAU2,ARHGAP33,FMR1,MEF2C,PTPRS,TANC2,EPHB1,NEURL1A
GO:BP	protein localization to cell periphery	GO:1990778	4.24e-12	11.3723	353	1390	58	27543	GIT1,SNAP25,TTC7B,GRIN2A,DLG4,PACSIN1,IQSEC2,CACNB3,NRXN1,DPP10,RILPL1,STX1B,KCNIP3,AKT2,MYO5A,RAPGEF4,CLSTN1,RAMP3,TESC,PPP1R9B,TSPAN5,PRKCZ,GRIN1,STXBP1,TTC7,CACNG2,RAMP1,ANK1,TSPAN33,TUB,KCNJ11,CPLX1,ZDHHC2,MAGI2,LRP1,AKAP5,DLG1,FAM126B,RAB31,RAB40C,NUMB,ACSL3,LYPD1,DDI2,PDPK1,ROCK2,RAB3C,PIK3R2,ADAM22,STAC3,SLC4A1,GRIN2C,ANK2,EGFR,VTI1B,ANK3,NPTX1,NFASC
GO:BP	calcium ion transport	GO:0006816	5.57e-12	11.2542	441	1390	66	27543	NOS1AP,GRIN2A,PRKCB,CALM1,SLC24A2,CACNA1I,ATP2B2,TRPC6,WFS1,ITPR1,PPP3CA,ATP2B1,SLC25A23,CACNB3,MYO5A,PACSIN3,CACNA2D3,JSRP1,RAMP3,JPH3,RYR1,HOMER1,JPH4,GRIN1,CACNG2,CACNB4,RAMP1,HOMER2,ADRB1,CXCL12,ATP2A1,USP2,PRKCE,STIM2,AHNAK,PTGS2,TMEM38A,CACNA1A,TRPM4,AKAP5,HTT,ITGAV,SLC24A3,OPRD1,ATP1A2,DDIT3,RYR2,TMEM37,PDPK1,CACNA2D1,SLC8A2,STAC3,ADRA1A,CACNB1,GRIN2C,ANK2,ASIC1,CACNA2D4,ORAI3,EDNRB,AKAP6,…
GO:BP	nitrogen compound transport	GO:0071705	5.83e-12	11.2345	2026	1390	184	27543	RPH3A,FBXW7,LY6E,GRM2,SNAP25,DIO2,PRKCB,KCNA2,SEC14L1,FGF9,ARC,GPM6B,PPP3CA,SFXN5,SENP2,RIMS1,KIF5C,APLN,ADORA1,SLC25A23,LMTK2,ASTN2,SYNDIG1,EXPH5,AP1S1,CACNB3,RAB6B,SLC6A1,CDK16,SORT1,RILPL1,STX1B,KCNIP3,SPCS3,AKT2,MYO5A,OLFR78,RAPGEF4,SPIRE1,MYRIP,CRY2,MAP1A,SLC1A3,ARF3,TFRC,PPP3R1,DUSP18,DMTN,CLSTN1,EFNA5,SYT1,RAMP3,GOLGA7B,SLC25A18,MYO18A,TESC,ACTN4,LRRK2,SYT12,SLC1A2,ADAM9,SLC12A5,BRSK2,PRKC…
GO:BP	cell growth	GO:0016049	6.64e-12	11.178	533	1390	74	27543	MGLL,TTL,NRN1,SMAD3,CPNE9,SYT2,SORBS2,OLFM1,BAP1,CYFIP2,RIMS1,IGFBP4,RTN4R,FSTL4,DAB2IP,HSPA1B,CLSTN1,VGLL4,EFNA5,SYT1,EXT1,PPP1R9B,FAM107A,DACT3,PRKCZ,PTK2,HBEGF,DCBLD2,PIN1,ADRB1,CXCL12,DIP2B,FRZB,PPARD,PPARG,CDK5R1,NRN1L,PSRC1,PLXNA4,UNC13A,CDKL5,FOXP1,MTPN,SMARCA2,GAS2L1,EXTL3,PTPRJ,WASF1,ACVRL1,DCLK1,CGRRF1,SRF,NTRK3,SERTAD1,PPARA,AUTS2,ADRA1A,CDHR2,EGFR,TWF2,AKAP6,PTPRS,TNFRSF12A,SEMA3G,SLI…
GO:BP	regulation of growth	GO:0040008	7.23e-12	11.1406	701	1390	88	27543	MGLL,TTL,PLCB1,SMAD3,CPNE9,SYT2,PRKCB,OLFM1,BAP1,FGF9,WFS1,RIMS1,IGFBP4,RTN4R,FSTL4,ERBB4,DAB2IP,HSPA1B,CLSTN1,VGLL4,EFNA5,SYT1,PPP1R9B,FAM107A,DACT3,WWC1,KCTD6,PTK2,HBEGF,DCBLD2,PIN1,ADRB1,DIO3,CXCL12,DIP2B,FRZB,PPARD,PPARG,CDK5R1,RBPJ,PSRC1,PLXNA4,TSPYL5,HEPACAM,MAPK14,UNC13A,DUSP6,PIM1,KCNK2,CDKL5,FOXP1,DLG1,MTPN,SMARCA2,NKD1,GAS2L1,EXTL3,IGSF11,MYOD1,PTPRJ,RBP4,ACVRL1,CGRRF1,SRF,NTRK3,SOCS3,S…
GO:BP	muscle system process	GO:0003012	7.8e-12	11.1077	422	1390	64	27543	SMAD3,TNNC1,SORBS2,CALM1,KCNA1,MYL4,CAMTA2,MYBPC3,ATP1A1,PPP3CA,ATP2B1,ADORA1,JSRP1,ADRA1B,RYR1,HOMER1,SCN1B,FBXO32,MYH2,APBB1,PTK2,DOCK4,ADRA2C,HDAC4,PDE5A,TPM1,FOXO3,PIN1,ADRB1,ZDHHC21,SMPD3,ACTA1,ATP2A1,PPARG,RAP1GDS1,PTGS2,TMEM38A,ARHGAP42,TRPM4,KCNN2,FOXP1,DLG1,MTPN,MYOD1,MYH7,SRF,ATP1A2,RYR2,MYH4,TRIM72,CACNA2D1,ROCK2,PPARA,STAC3,ADRA1A,ANK2,MEF2C,EDNRB,AKAP6,APBB2,MYH1,ABCC8,NOTCH1,EDNRA
GO:BP	small GTPase mediated signal transduction	GO:0007264	7.83e-12	11.1061	433	1390	65	27543	STARD8,DGKZ,SIPA1L1,GIT1,HEG1,RAP1GAP2,DOCK3,RTN4R,IQSEC2,ARHGEF9,ARAP2,RASGEF1B,RAPGEFL1,DAB2IP,IQSEC1,RAPGEF4,CCDC88C,CADM4,MRAS,RASGRP1,NET1,RASGEF1A,DOCK4,GARNL3,SCAI,SYNGAP1,BAIAP2,RAB15,DAB1,ADRB1,RELN,ARRB1,SRC,PSD3,EPS8L2,RASGEF1C,SH3BP1,MADD,ARHGAP42,ITGAV,CDC42BPA,WASF1,ARHGAP35,SIPA1L2,KITL,ARHGEF2,ARHGAP33,ROCK2,SPRY2,AUTS2,GPR17,DGKI,ADRA1A,ARHGEF25,ARHGEF3,RAB30,BRK1,SLIT2,DOK3,ARHG…
GO:BP	developmental maturation	GO:0021700	8.18e-12	11.0871	327	1390	55	27543	PLCB1,PHOSPHO1,BAP1,DLG4,CHRDL1,S1PR1,NRXN1,ERBB4,CDK5R2,DAB2IP,MYO5A,SHANK1,CLSTN1,RYR1,EXT1,ZBTB16,LRRK2,NRCAM,GRIN1,STXBP1,POU2F2,LGI4,FOXO3,PGR,RELN,CDK5R1,RBPJ,ZBTB7A,ZDHHC2,RPS6KA2,ABHD2,EPAS1,UNC13A,CEBPA,CACNA1A,EPHA8,AKAP5,UNC13B,ASCL1,DDIT3,AXL,PLXNB1,EDNRB,ANK3,ANKS1,SOX18,CDC25B,NFIA,NFASC,BCAN,BMP2,NEURL1A,RFX3,EDNRA,SEZ6L
GO:BP	axon guidance	GO:0007411	8.2e-12	11.0864	248	1390	47	27543	NTN5,PLXND1,LRTM2,KIF5C,RTN4R,LMTK2,CDK5R2,CNTN4,RTN4RL1,EFNA5,SCN1B,EXT1,NPTN,APBB1,NRCAM,FZD3,ROBO3,FLRT2,EGR2,CXCL12,RELN,CDK5R1,TBR1,RNF165,PLXNA4,EPHA8,MYH10,LAMA3,FOXP1,GLI3,ARHGAP35,LGR4,PLXNB1,BOC,MEF2C,APBB2,WNT7B,ANK3,SEMA3G,SLIT2,ETV1,EPHB1,NFASC,DSCAM,BDNF,NOTCH1,EDNRA
GO:BP	regulation of neurotransmitter transport	GO:0051588	8.81e-12	11.0549	135	1390	34	27543	NRN1,GIT1,PRKCB,CALM1,RIMS3,ADCY1,GPM6B,PPP1R9A,CPLX2,STX1B,SYT1,RIMS4,LRRK2,SYT12,STXBP1,CACNB4,APBA2,CNR1,NRXN3,STXBP5L,PRKCE,NTRK2,CPLX1,GIPC1,UNC13A,CACNA1A,HTR1B,HTR6,SLC4A8,DGKI,ADRA1A,ASIC1,MEF2C,DRD4
GO:BP	cellular response to oxygen-containing compound	GO:1901701	9.53e-12	11.021	1466	1390	145	27543	PLCB1,GIT1,LY6E,ZFP703,SORBS2,GRIN2A,CD6,PRKCB,TRPC6,BRINP1,ADCY1,ITPR1,PPP3CA,ATP2B1,RORA,CDK16,SMARCD1,DAB2IP,AKT2,MYO5A,INPPL1,OLFR78,BRINP2,SLC1A3,GPR37L1,CDK19,DMTN,EFNA5,E030003E18RIK,RAMP3,RYR1,TESC,LRRK2,SLC1A2,PPP1R9B,ADAM9,FBXO32,KLF16,BRSK2,SIRPA,NET1,PRKCZ,PIP4K2C,PTK2,CPEB2,IL12A,GRIK5,MAPK9,PRKCA,BAIAP2,TPM1,FOXO3,NR1D1,APC,PLEC,SMPD3,PDE8B,HCN1,PPARD,ARRB1,SRC,PPARG,CDK5R1,KCNJ11,T…
GO:BP	neuron projection guidance	GO:0097485	9.62e-12	11.0169	249	1390	47	27543	NTN5,PLXND1,LRTM2,KIF5C,RTN4R,LMTK2,CDK5R2,CNTN4,RTN4RL1,EFNA5,SCN1B,EXT1,NPTN,APBB1,NRCAM,FZD3,ROBO3,FLRT2,EGR2,CXCL12,RELN,CDK5R1,TBR1,RNF165,PLXNA4,EPHA8,MYH10,LAMA3,FOXP1,GLI3,ARHGAP35,LGR4,PLXNB1,BOC,MEF2C,APBB2,WNT7B,ANK3,SEMA3G,SLIT2,ETV1,EPHB1,NFASC,DSCAM,BDNF,NOTCH1,EDNRA
GO:BP	tube morphogenesis	GO:0035239	1.11e-11	10.9538	909	1390	104	27543	FBXW7,SMAD3,PRKCB,WNT4,HEG1,PAK1,FGF9,PLXND1,S1PR1,APLN,FMN1,RORA,NRXN1,DAB2IP,BMPER,PTN,LUZP1,HEY1,PPP3R1,SHANK3,EXT1,ZMIZ1,LMO4,NRCAM,PTK2,MYO1E,FZD3,IL12A,RAMP1,HBEGF,MIB1,PTPRB,MICAL2,PRKCA,PGR,HS6ST1,CXCL12,NRXN3,SHROOM3,SRC,RBPJ,NTRK2,EPAS1,MAPK14,PTGS2,PLCD3,FOXP1,ITGAV,DLG1,SMOC2,PODXL,ENG,ACVRL1,PTK7,NOTCH4,SRF,GLI3,ARHGAP35,VHL,RYR2,LRG1,ISM1,SPRED1,LGR4,PDPK1,ROCK2,CSMD1,AKT3,SPRY2,PIK…
GO:BP	potassium ion transport	GO:0006813	1.22e-11	10.9137	241	1390	46	27543	SNAP25,KCNC1,KCNA2,CALM1,PLCB4,KCNA1,SLC24A2,ATP1A1,ADORA1,RGS7,NETO2,KCNIP3,SLC1A3,KCNJ6,KCNH1,SLC12A5,KCNQ3,KCNJ9,ATP1B2,KCNJ12,SLC9A5,KCNJ10,HCN1,KCNK12,KCNJ11,TMEM38A,AKAP5,KCNK2,KCNN2,DLG1,SLC24A3,KCNS2,ATP1A2,KCNK1,KCNK9,LRRC38,ATF4,ANK2,KCNAB1,AKAP6,ANK3,KCNK3,AMIGO1,KCNN1,HCN2,ABCC8
GO:BP	positive regulation of protein metabolic process	GO:0051247	1.67e-11	10.7772	1519	1390	148	27543	PLCB1,FBXW7,CAMKK2,NOS1AP,SMAD3,CD6,CALM1,SLC39A10,TRPC6,DLG4,JDP2,PAK1,FGF9,WFS1,CYFIP2,BOK,SENP2,ADORA1,NRXN1,PPP1R9A,ERBB4,CDK5R2,DAB2IP,AKT2,PACSIN3,INCENP,RNF144A,TFRC,RASSF2,HSPA1B,VGLL4,EFNA5,RASGRP1,RAMP3,SLC25A37,NPTN,LRRK2,CDK2AP1,FAM107A,ADAM9,PRKCZ,PTK2,FERMT2,GRIN1,ADRA2C,SRCIN1,HECW1,HDAC4,FGFR3,IL12A,RAMP1,HBEGF,MAPK9,PTPRZ1,PDE5A,ZFP91,PIN1,APC,DAB1,MGAT4B,DIP2B,RELN,AGAP2,ARRB1,S…
GO:BP	positive regulation of cell death	GO:0010942	2.03e-11	10.6928	664	1390	84	27543	FBXW7,ATF6,GRIN2A,CALM1,OLFM1,ITPR1,BOK,ADORA1,SORT1,DKKL1,DAB2IP,PTN,DUSP1,CDK19,RASSF2,E030003E18RIK,RAMP3,ZBTB16,LRRK2,FBXO32,NET1,APBB1,GRIN1,HDAC4,IL12A,HTRA1,GRIK5,MAPK9,PTPRZ1,PDE5A,CNR1,FOXO3,PIN1,APC,ADRB1,FRZB,ARRB1,SRC,PPARG,CDK5R1,MAP3K9,ACVR1C,RPS6KA2,PTGS2,LRP1,EGR1,DUSP6,KCNK2,HTT,MELK,TNFRSF8,FOXP1,FZD9,FNIP1,UNC13B,NACC2,ASCL1,DDIT3,NTRK3,INPP5D,MAP3K10,PCSK9,PPARGC1A,PHLDA1,ATF4…
GO:BP	muscle cell differentiation	GO:0042692	2.17e-11	10.6643	409	1390	62	27543	SORBS2,WNT4,FGF9,PPP3CA,RORA,SORT1,SYNE1,MYLK3,CNTNAP1,PTGFRN,HEY1,RYR1,HOMER1,ACTN4,PLEKHO1,HDAC4,CACNB4,TPM1,PIN1,HIRA,ADRB1,PLEC,CXCL12,ACTA1,RBPJ,IL4RA,MAPK14,MYH10,FOXP1,MTPN,ACTN1,MYOD1,ENG,SRF,CSRP1,TRIM72,SOX6,PPARA,TANC1,STAC3,QK,ADRA1A,HOPX,ANK2,MEF2C,EDNRB,AKAP6,KLHL40,XK,WNT7B,ADM,JAM2,SOX9,BMP2,BDNF,SMARCA4,FHL2,NOTCH1,ALPK2,MYH9,BARX2,EDNRA
GO:BP	chemotaxis	GO:0006935	2.32e-11	10.6341	617	1390	80	27543	SMAD3,NBL1,NTN5,PLXND1,LRTM2,S1PR1,KIF5C,RTN4R,LMTK2,PIP5K1C,CDK5R2,AKT2,PTN,CNTN4,DUSP1,RTN4RL1,EFNA5,SCN1B,EXT1,NPTN,APBB1,CXCL14,NRCAM,PTK2,DOCK4,FZD3,IL12A,HBEGF,ROBO3,SWAP70,FLRT2,PLEC,EGR2,CXCL12,RELN,CDK5R1,TBR1,RNF165,PLXNA4,DUSP3,EPHA8,PREX1,TRPM4,MYH10,LAMA3,FOXP1,ITGAV,SMOC2,LSP1,ACKR2,ENG,PTPRJ,GLI3,ARHGAP35,NTRK3,NRG3,LGR4,CCL27A,PLXNB1,BOC,MEF2C,EDNRB,APBB2,WNT7B,ANK3,IL17RA,SEMA3G,…
GO:BP	organelle organization	GO:0006996	2.44e-11	10.6123	3787	1390	293	27543	MAP6D1,TTL,PLCB1,STARD8,FBXW7,DGKZ,SIPA1L1,GIT1,ASAP1,NOS1AP,SMAD3,KCTD17,SNAP25,ZNFX1,SORBS2,ARHGEF17,TUBA4A,PRKCB,CALM1,WNT4,TTLL11,ATP2B2,BAP1,DLG4,MEI1,PACSIN1,PAK1,ARC,GPM6B,ZMYND8,MAST3,TRIM37,CYFIP2,BOK,DLGAP1,S1PR1,FMN1,INF2,ARHGEF9,MAN2A1,ARHGAP10,PHACTR1,NRXN1,GOLM1,TBC1D30,PPP1R9A,RAB6B,MYO5C,LYST,SORT1,RILPL1,ERBB4,SMARCD1,SYNE1,CPLX2,STX1B,AKT2,MYO5A,IQSEC1,INPPL1,MYLK3,CNTNAP1,SHANK…
GO:BP	response to external stimulus	GO:0009605	2.6e-11	10.5854	3104	1390	251	27543	MGLL,ANO3,GIT1,WHRN,SMAD3,ZNFX1,GRIN2A,DIO2,KCNC1,NBL1,CD6,WNT4,KCNA1,SLC24A2,ATP2B2,SEC14L1,BAP1,HERC6,NTN5,ATP1A1,PLXND1,LRTM2,ATP2B1,S1PR1,KIF5C,ADORA1,RTN4R,LMTK2,TYRO3,PIP5K1C,RORA,AP1S1,CACNB3,NRXN1,LYST,CDK5R2,DAB2IP,AKT2,STRBP,PTN,SHANK1,CNTN4,CRY2,SLC1A3,DUSP1,DAGLB,CDK19,TFRC,ASH1L,RTN4RL1,KCNH1,FOXK1,DMTN,EFNA5,GLRB,RASGRP1,SHANK3,MYO18A,SCN1B,EXT1,BHLHE40,NPTN,LRRK2,C1RA,SLC1A2,FOXK2,…
GO:BP	regulation of postsynapse organization	GO:0099175	2.76e-11	10.5593	109	1390	30	27543	SIPA1L1,LZTS3,ARC,CUX2,ZMYND8,NRXN1,PPP1R9A,RAPGEF4,PTPRD,ABHD17A,SHANK3,HOMER1,LRRK2,NRCAM,GRIN1,SRCIN1,BAIAP2,RELN,CDK5R1,CDKL5,VHL,NTRK3,STAU2,ARHGAP33,TANC1,IL1RAPL1,PTPRS,PTPRF,NPTX1,TANC2
GO:BP	taxis	GO:0042330	2.78e-11	10.5563	619	1390	80	27543	SMAD3,NBL1,NTN5,PLXND1,LRTM2,S1PR1,KIF5C,RTN4R,LMTK2,PIP5K1C,CDK5R2,AKT2,PTN,CNTN4,DUSP1,RTN4RL1,EFNA5,SCN1B,EXT1,NPTN,APBB1,CXCL14,NRCAM,PTK2,DOCK4,FZD3,IL12A,HBEGF,ROBO3,SWAP70,FLRT2,PLEC,EGR2,CXCL12,RELN,CDK5R1,TBR1,RNF165,PLXNA4,DUSP3,EPHA8,PREX1,TRPM4,MYH10,LAMA3,FOXP1,ITGAV,SMOC2,LSP1,ACKR2,ENG,PTPRJ,GLI3,ARHGAP35,NTRK3,NRG3,LGR4,CCL27A,PLXNB1,BOC,MEF2C,EDNRB,APBB2,WNT7B,ANK3,IL17RA,SEMA3G,…
GO:BP	metal ion homeostasis	GO:0055065	3e-11	10.5229	525	1390	72	27543	KCTD17,PRKCB,CALM1,SLC39A10,KCNA1,SLC24A2,ATP2B2,TRPC6,WFS1,ITPR1,ATP1A1,BOK,ATP2B1,ADORA1,SLC25A23,SLC30A4,MYO5A,SLC1A3,JSRP1,MYH7B,TFRC,CLSTN1,JPH3,SLC25A37,RYR1,EXT1,TESC,NPTN,SLC12A5,GRIN1,TTC7,ATP1B2,ANK1,KCNJ10,ATP2A1,PYGM,PRKCE,RAP1GDS1,STIM2,EPAS1,TMEM38A,CACNA1A,HTT,ITGAV,SLC24A3,MLLT6,FZD9,ATP1A2,DDIT3,SLC39A14,CALB1,RYR2,PDPK1,SLC8A2,HTR1B,ATF4,SCNN1A,ANK2,EGFR,EDNRB,AKAP6,ITPR2,ALAS2,…
GO:BP	regulation of protein localization	GO:0032880	3.5e-11	10.4562	925	1390	104	27543	FBXW7,SNAP25,SORBS2,DLG4,GPM6B,ZMYND8,PPP3CA,ASTN2,EXPH5,IQSEC2,CACNB3,NRXN1,DPP10,CDK16,ERBB4,AKT2,BMPER,MYO5A,OLFR78,PTN,RAPGEF4,MYRIP,MAP1A,TFRC,DMTN,EFNA5,ABHD17A,RAMP3,SHANK3,MYO18A,NPTN,LRRK2,PPP1R9B,ADAM9,BRSK2,PRKCZ,APBB1,FERMT2,SRCIN1,CACNG2,IL12A,CACNB4,CNR1,SWAP70,NR1D1,PIN1,APC,ADRB1,PDE8B,PPARD,ARRB1,SRC,PPARG,STXBP5L,CDK5R1,KCNJ11,PKIG,PRKCE,CELSR2,LRP4,ZDHHC2,MTCL1,ACVR1C,MAPK14,PT…
GO:BP	potassium ion transmembrane transport	GO:0071805	4.88e-11	10.312	212	1390	42	27543	SNAP25,KCNC1,KCNA2,CALM1,KCNA1,SLC24A2,ATP1A1,RGS7,NETO2,KCNIP3,SLC1A3,KCNJ6,KCNH1,SLC12A5,KCNQ3,KCNJ9,ATP1B2,KCNJ12,SLC9A5,KCNJ10,HCN1,KCNK12,KCNJ11,TMEM38A,KCNK2,KCNN2,DLG1,SLC24A3,KCNS2,ATP1A2,KCNK1,KCNK9,LRRC38,ANK2,KCNAB1,AKAP6,ANK3,KCNK3,AMIGO1,KCNN1,HCN2,ABCC8
GO:BP	circulatory system process	GO:0003013	5.02e-11	10.2996	542	1390	73	27543	MGLL,NOS1AP,SMAD3,TNNC1,CALM1,HEG1,MYL4,MYBPC3,ATP1A1,ATP2B1,APLN,ADORA1,MYLK3,OLFR78,GPR37L1,ADRA1B,RAMP3,SCN1B,EXT1,PTK2,DOCK4,FERMT2,ADRA2C,HDAC4,HBEGF,PDE5A,TPM1,CNR1,RASL10B,ADRB1,ZDHHC21,PLEC,SMPD3,ATP2A1,PPARD,SRC,RAP1GDS1,RPS6KA2,EPAS1,PTGS2,TMEM38A,ARHGAP42,CORO2B,TRPM4,KCNN2,DLG1,ENG,PTPRJ,ACVRL1,MYH7,ATP1A2,ARHGAP35,RYR2,CACNA2D1,HTR1B,PPARA,ADRA1A,HOPX,ANK2,EGFR,EDNRB,AKAP6,WWTR1,PRCP…
GO:BP	cellular ion homeostasis	GO:0006873	6.12e-11	10.2129	509	1390	70	27543	KCTD17,PRKCB,CALM1,SLC39A10,SLC24A2,ATP2B2,TRPC6,WFS1,ITPR1,ATP1A1,BOK,ATP2B1,ADORA1,SLC25A23,SLC30A4,MYO5A,SLC1A3,JSRP1,MYH7B,TFRC,CLSTN1,JPH3,RYR1,TESC,NPTN,LRRK2,SLC12A5,PTK2,GRIN1,TTC7,SLC4A11,ATP1B2,SLC9A5,CKB,ATP2A1,PYGM,PRKCE,RAP1GDS1,STIM2,TMEM38A,CACNA1A,SLC4A4,HTT,ITGAV,SLC24A3,FZD9,ATP1A2,DDIT3,SLC39A14,CALB1,RYR2,PDPK1,SLC8A2,HTR1B,ATF4,SCNN1A,SLC4A8,SLC4A1,ANK2,AKAP6,ITPR2,ALAS2,XK,S…
GO:BP	cell-substrate adhesion	GO:0031589	7.16e-11	10.1452	365	1390	57	27543	SMAD3,WNT4,GPM6B,FMN1,TYRO3,PTN,ATRNL1,TTYH1,DMTN,EFNA5,MEGF9,ACTN4,FAM107A,ADAM9,SIRPA,PRKCZ,MERTK,PTK2,FERMT2,SRCIN1,ATP1B2,PTPRZ1,PPARD,LAMB3,SRC,ITGAL,PRKCE,DMP1,NTNG2,DUSP3,CORO2B,PREX1,ITGAV,SMOC2,ACTN1,PTPRJ,ACVRL1,SRF,MSLNL,AXL,PDPK1,UTRN,TRIOBP,GCNT2,ITGB8,RCC2,FBLN2,COL26A1,TNFRSF12A,DUSP22,EPHB1,BCAN,VWF,RHPN1,NOTCH1,HPSE,ADAM8
GO:BP	positive regulation of transferase activity	GO:0051347	7.52e-11	10.124	570	1390	75	27543	FBXW7,CAMKK2,DGKZ,DLG4,PAK1,ADORA1,LMTK2,TYRO3,NRXN1,PPP1R9A,ERBB4,CDK5R2,DAB2IP,INCENP,RASSF2,RASGRP1,LRRK2,PARM1,ADAM9,LMO4,PRKCZ,MERTK,PTK2,FERMT2,ADRA2C,SRCIN1,FGFR3,HBEGF,PDE5A,ZFP91,PIN1,DAB1,RELN,AGAP2,SRC,CDK5R1,TRIB1,RANBP2,PSRC1,TTBK1,NTRK2,MAP3K14,EPHA8,EGR1,PIM1,MAS1,DLG1,NTRK3,AXL,STRADB,MAP3K10,KITL,SORL1,RFC5,PDPK1,OSBPL8,SPRY2,SLC8A2,AXIN2,DVL3,ADRA1A,MEF2C,EGFR,AKAP6,FZD10,FAM20A…
GO:BP	negative regulation of metabolic process	GO:0009892	7.9e-11	10.1023	3558	1390	277	27543	SCRT1,ARPP19,PLCB1,FBXW7,NFIC,GIT1,ZFPM1,CCDC3,SMAD3,PTPN3,KCTD1,GFRA2,ZNFX1,ZFP703,GRIN2A,OLFM1,WNT4,HEG1,WNT9A,RASD1,DUSP7,BAP1,JDP2,FGF9,WFS1,CUX2,ATP1A1,ZMYND8,TRIM37,PPP3CA,SENP2,ATP2B1,APLN,ADORA1,ABHD6,NRXN1,LRRC32,MAF,DKKL1,DAB2IP,KCNIP3,AKT2,ZBTB18,INPPL1,CRY2,MAP1A,DUSP1,RASSF2,HEY1,HSPA1B,UBQLN4,CXXC5,FOXK1,DMTN,CADM4,ADARB1,VGLL4,E030003E18RIK,POU6F1,ZBTB16,BHLHE40,NPTN,LRRK2,PPP1R9B,…
GO:BP	excitatory postsynaptic potential	GO:0060079	7.95e-11	10.0997	113	1390	30	27543	GRIN2A,DLG4,CUX2,ZMYND8,PPP3CA,ADORA1,CACNB3,NRXN1,PPP1R9A,STX1B,SHANK1,GLRB,SHANK3,LRRK2,PRKAR1B,PRKCZ,GRIN1,GRIK5,TBC1D24,BAIAP2,PCLO,RELN,MPP2,IGSF11,SLC8A2,DGKI,GRIN2C,MEF2C,DRD4,BDNF
GO:BP	forebrain development	GO:0030900	1.04e-10	9.98248	423	1390	62	27543	PLCB1,KCNC1,WNT4,KCNA1,RTN4R,TYRO3,PHACTR1,ERBB4,CDK5R2,DAB2IP,ZBTB18,RTN4RL1,SHANK3,EXT1,ZMIZ1,LRRK2,SLC1A2,PPP1R9B,SUN1,GRIN1,ATP1B2,DAB1,TACC1,CXCL12,RELN,SRC,CDK5R1,TBR1,RBPJ,PLXNA4,NTRK2,MYH10,MAS1,FOXP1,SUN2,NUMB,DCLK1,SRF,NCOR2,ATP1A2,GLI3,ASCL1,ARHGAP35,AXL,NRG3,IGF1R,GDPD5,HTR6,RTN4RL2,EGFR,PTPRS,WNT7B,AGTPBP1,SLIT2,ALDH1A3,BCAN,BMP2,SMARCA4,BTBD3,NOTCH1,CRH,INHBA
GO:BP	positive regulation of ion transmembrane transporter activity	GO:0032414	1.1e-10	9.95688	122	1390	31	27543	PLCB1,KCNC1,CALM1,KCNA1,TRPC6,ARC,CACNB3,MYO5A,SHANK3,TESC,CACNG2,CACNB4,ATP1B2,ADRB1,RELN,HCN1,ATP2A1,KCNJ11,STIM2,HTT,RYR2,LRRC38,CACNA2D1,STAC3,ANK2,AKAP6,ANK3,AMIGO1,DRD4,ABCC8,EDNRA
GO:BP	telencephalon development	GO:0021537	1.11e-10	9.95649	285	1390	49	27543	PLCB1,KCNA1,RTN4R,PHACTR1,ERBB4,CDK5R2,DAB2IP,ZBTB18,RTN4RL1,SHANK3,EXT1,ZMIZ1,LRRK2,SLC1A2,PPP1R9B,SUN1,GRIN1,ATP1B2,DAB1,TACC1,CXCL12,RELN,CDK5R1,TBR1,PLXNA4,NTRK2,MYH10,MAS1,FOXP1,SUN2,NUMB,SRF,NCOR2,ATP1A2,GLI3,ASCL1,NRG3,IGF1R,HTR6,RTN4RL2,EGFR,PTPRS,AGTPBP1,SLIT2,ALDH1A3,BCAN,BMP2,BTBD3,INHBA
GO:BP	regulation of axonogenesis	GO:0050770	1.18e-10	9.92754	172	1390	37	27543	SIPA1L1,PLXND1,RTN4R,FSTL4,EFNA5,BRSK2,PTK2,GRIN1,LRRC4C,SYNGAP1,DAB1,CXCL12,DIP2B,CDK5R1,TRAK1,PLXNA4,NTRK2,MARK2,LRP4,CACNA1A,BRSK1,CDKL5,SRF,SLITRK1,ARHGAP35,NTRK3,METRN,PLXNB1,TWF2,PTPRS,XK,TNFRSF12A,SEMA3G,AMIGO1,SLIT2,DSCAM,BDNF
GO:BP	negative regulation of multicellular organismal process	GO:0051241	1.26e-10	9.90011	1078	1390	114	27543	FBXW7,GIT1,ZFPM1,SMAD3,WNT4,WNT9A,LINGO1,TRPC6,BRINP1,ATP1A1,PPP3CA,ATP2B1,APLN,ADORA1,RTN4R,ABHD6,CACNB3,LRRC32,FSTL4,DAB2IP,PTN,VASN,CRY2,GPR37L1,VGLL4,E030003E18RIK,NPTN,FBXO32,DACT3,WWC1,SIRPA,MERTK,PTK2,DOCK4,ADRA2C,IL12A,NAV3,PDE5A,SYNGAP1,HOMER2,NR1D1,DAB1,ADRB1,NDRG2,DIP2B,FRZB,ATP2A1,ARRB1,PPARG,CDK5R1,RBPJ,TRIB1,LRP4,IL4RA,ACVR1C,PTGS2,ARHGAP42,ZBTB7B,TRPM4,ATG12,KCNK2,FOXP1,RBP4,ACVRL1…
GO:BP	Wnt signaling pathway	GO:0016055	1.26e-10	9.89839	436	1390	63	27543	SMAD3,ZFP703,NLK,WNT4,WNT9A,FGF9,SENP2,LYPD6,DKKL1,DAB2IP,CCDC88C,VGLL4,EXT1,LRRK2,CTNND2,TLE6,DACT3,FERMT2,CSNK1G2,FZD3,PLEKHA4,FOXO3,PIN1,APC,NDRG2,TLE1,FRZB,SRC,RBPJ,FAM53B,CELSR2,LRP4,MAPK14,TMEM198,TBL1XR1,TRPM4,EGR1,WNT10A,NKD1,PTK7,FZD9,GLI3,DDIT3,TLE3,LGR4,TMEM170B,AXIN2,RSPO2,DVL3,CTHRC1,EGFR,EDNRB,WNT7B,FZD10,WWTR1,YAP1,SOX9,GRK5,BMP2,SMARCA4,NOTCH1,ALPK2,EDNRA
GO:BP	cellular cation homeostasis	GO:0030003	1.38e-10	9.86056	494	1390	68	27543	KCTD17,PRKCB,CALM1,SLC39A10,SLC24A2,ATP2B2,TRPC6,WFS1,ITPR1,ATP1A1,BOK,ATP2B1,ADORA1,SLC25A23,SLC30A4,MYO5A,SLC1A3,JSRP1,MYH7B,TFRC,CLSTN1,JPH3,RYR1,TESC,NPTN,LRRK2,SLC12A5,GRIN1,TTC7,SLC4A11,ATP1B2,SLC9A5,ATP2A1,PYGM,PRKCE,RAP1GDS1,STIM2,TMEM38A,CACNA1A,SLC4A4,HTT,ITGAV,SLC24A3,FZD9,ATP1A2,DDIT3,SLC39A14,CALB1,RYR2,PDPK1,SLC8A2,HTR1B,ATF4,SCNN1A,SLC4A8,SLC4A1,ANK2,AKAP6,ITPR2,ALAS2,XK,S100B,GPR8…
GO:BP	cell-cell signaling by wnt	GO:0198738	1.56e-10	9.80594	438	1390	63	27543	SMAD3,ZFP703,NLK,WNT4,WNT9A,FGF9,SENP2,LYPD6,DKKL1,DAB2IP,CCDC88C,VGLL4,EXT1,LRRK2,CTNND2,TLE6,DACT3,FERMT2,CSNK1G2,FZD3,PLEKHA4,FOXO3,PIN1,APC,NDRG2,TLE1,FRZB,SRC,RBPJ,FAM53B,CELSR2,LRP4,MAPK14,TMEM198,TBL1XR1,TRPM4,EGR1,WNT10A,NKD1,PTK7,FZD9,GLI3,DDIT3,TLE3,LGR4,TMEM170B,AXIN2,RSPO2,DVL3,CTHRC1,EGFR,EDNRB,WNT7B,FZD10,WWTR1,YAP1,SOX9,GRK5,BMP2,SMARCA4,NOTCH1,ALPK2,EDNRA
GO:BP	positive regulation of cell development	GO:0010720	1.61e-10	9.79395	361	1390	56	27543	CUX2,PLXND1,MAN2A1,PTN,MPL,PTPRD,DMTN,EFNA5,SHANK3,FBXO31,NPTN,TLE6,PTK2,FERMT2,FZD3,MAPK9,PTPRZ1,PDE5A,ZFP365,TBC1D24,BAIAP2,EGR2,CXCL12,RELN,PPARG,TRIB1,TRAK1,PLXNA4,NTRK2,PREX1,AKAP5,CDKL5,MYOD1,NUMB,SRF,GLI3,SLITRK1,ASCL1,NTRK3,METRN,STAU2,PLXNB1,QK,EGFR,TRIOBP,TWF2,PTPRF,TNFRSF12A,AMIGO1,DSCAM,BMP2,BDNF,NEURL1A,RFX3,NOTCH1,HPSE
GO:BP	postsynaptic density organization	GO:0097106	1.66e-10	9.77933	49	1390	20	27543	DGKZ,SIPA1L1,GIT1,DLG4,ZMYND8,DLGAP1,NRXN1,CNTNAP1,SHANK1,PTPRD,SHANK3,SYNGAP1,RELN,MAGI2,MPP2,DLG1,NTRK3,SHANK2,PTPRS,NPTX1
GO:BP	supramolecular fiber organization	GO:0097435	2.06e-10	9.68628	755	1390	89	27543	MAP6D1,GIT1,SMAD3,SORBS2,WNT4,PACSIN1,PAK1,CYFIP2,S1PR1,FMN1,PHACTR1,PPP1R9A,MYO5C,MYO5A,INPPL1,MYLK3,SHANK1,SPIRE1,SPTBN2,MAP1A,HSPA1B,CCDC88C,DMTN,SHANK3,SPTB,EXT1,ARHGEF10L,ACTN4,PPP1R9B,FAM107A,TLE6,SIRPA,FERMT2,CTNNA2,MYO1E,NAV3,MICAL2,BAIAP2,TPM1,SWAP70,CIT,APC,PLEC,ACTA1,ARRB1,SRC,PKP1,PRKCE,PSRC1,RAP1GDS1,SH3BP1,SCX,CORO2B,NEFH,MYH10,FOXP1,DLG1,MTPN,GAS2L1,ACTN1,WASF1,SRF,FAM171A1,ARHGAP3…
GO:BP	negative regulation of developmental process	GO:0051093	2.28e-10	9.64272	1033	1390	110	27543	FBXW7,ZFPM1,ASAP1,SMAD3,WNT4,WNT9A,LINGO1,TRPC6,JDP2,FGF9,BRINP1,PPP3CA,RTN4R,RORA,FSTL4,SORT1,DAB2IP,PTN,VASN,CNTN4,GPR37L1,TFRC,RTN4RL1,DMTN,VGLL4,EFNA5,ZBTB16,ACTN4,DACT3,WWC1,HES3,APBB1,CXCL14,PTK2,FERMT2,HDAC4,MIB1,PTPRZ1,SYNGAP1,FOXO3,NR1D1,DAB1,ADRB1,ESRRB,DIP2B,FRZB,PPARD,CDK5R1,RBPJ,USP2,TRIB1,FAT3,LRP4,IL4RA,ZBTB7B,TRPM4,KCNK2,FOXP1,ITGAV,LMO2,NKD1,GAS2L1,RBP4,ACVRL1,NOTCH4,NCOR2,GLI3,A…
GO:BP	regulation of cell junction assembly	GO:1901888	2.74e-10	9.56213	213	1390	41	27543	SIPA1L1,SMAD3,WNT4,CUX2,GPM6B,LRTM2,FMN1,SYNDIG1,NRXN1,PPP1R9A,FARP1,PTPRD,DMTN,CLSTN1,EFNA5,FAM107A,PTK2,FERMT2,GRIN1,NEGR1,FLRT2,SRC,NTRK2,NTNG2,DUSP3,PTPRJ,ACVRL1,SLITRK1,NTRK3,STAU2,ROCK2,IL1RAPL1,HOPX,MEF2C,PTPRS,RCC2,NPTX1,AMIGO1,DUSP22,EPHB1,BDNF
GO:BP	regulation of canonical Wnt signaling pathway	GO:0060828	2.88e-10	9.54122	242	1390	44	27543	SMAD3,ZFP703,FGF9,LYPD6,DKKL1,DAB2IP,CCDC88C,LRRK2,CTNND2,TLE6,DACT3,CSNK1G2,PLEKHA4,FOXO3,PIN1,APC,TLE1,FRZB,SRC,RBPJ,FAM53B,LRP4,MAPK14,TMEM198,TBL1XR1,TRPM4,EGR1,NKD1,PTK7,FZD9,GLI3,DDIT3,TLE3,LGR4,TMEM170B,AXIN2,RSPO2,CTHRC1,EGFR,WWTR1,YAP1,SOX9,BMP2,NOTCH1
GO:BP	organic substance biosynthetic process	GO:1901576	3.05e-10	9.51553	5770	1390	404	27543	MAP6D1,SCRT1,ARPP19,MGLL,ADCY9,PLCB1,DGKZ,NFIC,ZFPM1,CCDC3,SMAD3,CUX1,KCTD1,TTC7B,ZFP703,ATF6,NLK,ETNK2,PRKCB,WNT4,RASD1,BAP1,JDP2,CAMTA2,FGF9,DPY19L1,CAMK4,WFS1,ADCY1,CUX2,ATP1A1,ZMYND8,TRIM37,PPP3CA,MAN1C1,SENP2,ST3GAL5,S1PR1,ZDHHC8,APLN,GUCY2G,GALNT18,AGMAT,ZMIZ2,PIP5K1C,RORA,ABHD6,MAN2A1,PKNOX2,CDK16,ALOX12B,GCNT4,MAF,DKKL1,ERBB4,FUT9,LPCAT4,PIP5K1B,SMARCD1,DAB2IP,KCNIP3,AKT2,MYO5A,ZBTB18,INP…
GO:BP	regulation of GTPase activity	GO:0043087	3.5e-10	9.45605	346	1390	54	27543	SIPA1L1,ASAP1,WNT4,PLXND1,RAP1GAP2,S1PR1,RTN4R,RGS7,TBC1D30,ARAP2,RASGEF1B,RAPGEFL1,DAB2IP,AKT2,IQSEC1,RAPGEF4,ADAP1,TBC1D22A,FGD6,EFNA5,RASGRP1,LRRK2,NET1,RASGEF1A,FERMT2,CPEB2,RASAL2,GARNL3,SYNGAP1,PIN1,ADRB1,ARRB1,ASAP2,RASGEF1C,RAP1GDS1,PLXNA4,NTRK2,SH3BP1,ARHGAP42,PREX1,CDKL5,ARHGAP35,NTRK3,SIPA1L2,PLXNB1,SPRY2,DGKI,DVL3,RCC2,FZD10,ARHGEF19,ARHGAP25,VAV3,TBC1D2
GO:BP	regulation of synaptic transmission, glutamatergic	GO:0051966	4.38e-10	9.35865	76	1390	24	27543	DGKZ,GRM2,GRIN2A,ADORA1,NRXN1,GRIA4,MYO5A,SYT1,SHANK3,HOMER1,LRRK2,STXBP1,CACNG2,CNR1,RELN,HCN1,NTRK2,PTGS2,SHANK2,HTR1B,DGKI,MEF2C,EGFR,GRIK3
GO:BP	positive regulation of cellular protein metabolic process	GO:0032270	4.5e-10	9.34714	1437	1390	138	27543	FBXW7,CAMKK2,NOS1AP,SMAD3,CD6,CALM1,SLC39A10,TRPC6,DLG4,JDP2,PAK1,FGF9,WFS1,CYFIP2,BOK,SENP2,ADORA1,NRXN1,PPP1R9A,ERBB4,CDK5R2,DAB2IP,AKT2,PACSIN3,INCENP,RNF144A,TFRC,RASSF2,HSPA1B,VGLL4,EFNA5,RASGRP1,RAMP3,NPTN,LRRK2,CDK2AP1,FAM107A,ADAM9,PRKCZ,PTK2,FERMT2,GRIN1,ADRA2C,SRCIN1,HDAC4,FGFR3,IL12A,RAMP1,HBEGF,MAPK9,PTPRZ1,PDE5A,ZFP91,PIN1,DAB1,MGAT4B,DIP2B,RELN,AGAP2,ARRB1,SRC,CDK5R1,TRIB1,PSRC1,PRS…
GO:BP	response to abiotic stimulus	GO:0009628	4.51e-10	9.3455	1280	1390	127	27543	FBXW7,ANO3,WHRN,SMAD3,GRIN2A,DIO2,KCNC1,ARPP21,KCNA1,SLC24A2,ATP2B2,ITPR1,ATP1A1,ATP2B1,ADORA1,SLC25A23,RORA,CACNB3,RGS7,NRXN1,AKT2,STRBP,PTN,VASN,CRY2,SLC1A3,MPL,TFRC,HSPA1B,SHANK3,RYR1,EXT1,BHLHE40,ACTN4,NPTN,SLC1A2,FBXO32,SLC12A5,NET1,GRIN1,CPEB2,FZD3,HDAC4,SLC4A11,IL12A,CACNB4,MAPK9,SYNGAP1,METRNL,FOXO3,PIN1,IER5,ADRB1,DIO3,PLEC,CXCL12,PDE8B,ACTA1,PYGM,PPARD,ARRB1,SRC,PPARG,RBPJ,USP2,CPEB4,PR…
GO:BP	negative regulation of synaptic transmission	GO:0050805	4.65e-10	9.33284	83	1390	25	27543	MGLL,SLC24A2,ARC,ADORA1,ABHD6,PPP1R9A,SLC6A1,MYO5A,RAPGEF4,SHANK3,LRRK2,STXBP1,SORCS3,HCN1,PTGS2,SRF,STAU2,SHANK2,HTR1B,HTR6,DGKI,ASIC1,DRD4,BDNF,GRIK3
GO:BP	calcium ion transmembrane transport	GO:0070588	4.85e-10	9.31392	338	1390	53	27543	NOS1AP,GRIN2A,CALM1,SLC24A2,CACNA1I,ATP2B2,TRPC6,ITPR1,ATP2B1,SLC25A23,CACNB3,MYO5A,CACNA2D3,JSRP1,RAMP3,JPH3,RYR1,GRIN1,CACNG2,CACNB4,ADRB1,ATP2A1,PRKCE,STIM2,AHNAK,TMEM38A,CACNA1A,TRPM4,AKAP5,HTT,ITGAV,SLC24A3,ATP1A2,DDIT3,RYR2,TMEM37,PDPK1,CACNA2D1,SLC8A2,STAC3,ADRA1A,CACNB1,GRIN2C,ANK2,ASIC1,CACNA2D4,ORAI3,EDNRB,AKAP6,ITPR2,CACNA1E,DRD4,EDNRA
GO:BP	biosynthetic process	GO:0009058	4.89e-10	9.31105	5876	1390	409	27543	MAP6D1,SCRT1,ARPP19,MGLL,ADCY9,PLCB1,DGKZ,NFIC,ZFPM1,CCDC3,SMAD3,CUX1,KCTD1,TTC7B,ZFP703,ATF6,DIO2,NLK,ETNK2,PRKCB,WNT4,RASD1,BAP1,JDP2,CAMTA2,FGF9,DPY19L1,CAMK4,WFS1,ADCY1,CUX2,ATP1A1,ZMYND8,TRIM37,PPP3CA,MAN1C1,SENP2,ST3GAL5,S1PR1,ZDHHC8,APLN,GUCY2G,GALNT18,AGMAT,ZMIZ2,PIP5K1C,RORA,ABHD6,MAN2A1,PKNOX2,CDK16,ALOX12B,GCNT4,MAF,DKKL1,ERBB4,FUT9,LPCAT4,PIP5K1B,SMARCD1,DAB2IP,KCNIP3,AKT2,MYO5A,ZBTB1…
GO:BP	regulation of small GTPase mediated signal transduction	GO:0051056	5.06e-10	9.29597	236	1390	43	27543	STARD8,DGKZ,SIPA1L1,GIT1,HEG1,RAP1GAP2,RTN4R,IQSEC2,ARAP2,DAB2IP,IQSEC1,CADM4,RASGRP1,NET1,RASGEF1A,GARNL3,SCAI,SYNGAP1,RELN,ARRB1,SRC,PSD3,EPS8L2,SH3BP1,MADD,ARHGAP42,ITGAV,CDC42BPA,ARHGAP35,SIPA1L2,KITL,ARHGEF2,SPRY2,AUTS2,GPR17,DGKI,ADRA1A,ARHGEF25,ARHGEF3,SLIT2,ARHGAP25,STK19,NOTCH1
GO:BP	neuromuscular process	GO:0050905	5.24e-10	9.28035	180	1390	37	27543	TNNC1,GRIN2A,KCNA1,ATP2B2,DLG4,ITPR1,RBFOX1,NRXN1,CNTNAP1,SHANK1,MAP1A,SLC1A3,JSRP1,PRRT2,KCNH1,ADARB1,GLRB,JPH3,SHANK3,HOMER1,JPH4,CTNNA2,GRIN1,PDE8B,ATP2A1,CACNA1A,MYH10,HERC1,MYH7,ASCL1,CSMD1,STAC3,GRIN2C,AGTPBP1,ALDH1A3,HIPK2,EDNRA
GO:BP	positive regulation of programmed cell death	GO:0043068	6.34e-10	9.19768	594	1390	75	27543	FBXW7,ATF6,GRIN2A,CALM1,OLFM1,ITPR1,BOK,SORT1,DKKL1,DAB2IP,PTN,DUSP1,CDK19,RASSF2,E030003E18RIK,ZBTB16,LRRK2,FBXO32,NET1,APBB1,GRIN1,HDAC4,IL12A,HTRA1,GRIK5,MAPK9,PDE5A,CNR1,FOXO3,PIN1,APC,ADRB1,FRZB,ARRB1,SRC,PPARG,CDK5R1,MAP3K9,ACVR1C,RPS6KA2,PTGS2,EGR1,DUSP6,HTT,MELK,TNFRSF8,FZD9,FNIP1,UNC13B,NACC2,ASCL1,DDIT3,NTRK3,INPP5D,MAP3K10,PCSK9,PPARGC1A,PHLDA1,ATF4,MEF2C,APBB2,PTPRF,S100B,TNFRSF12A,AD…
GO:BP	regulation of exocytosis	GO:0017157	6.84e-10	9.16511	238	1390	43	27543	NRN1,GIT1,PRKCB,CALM1,RIMS3,CACNA1I,ADCY1,EXPH5,CDK5R2,STX1B,MYO5A,RAPGEF4,SYT1,RIMS4,LRRK2,SYT12,STXBP1,CACNB4,APBA2,RAB15,CNR1,SMPD3,PCLO,NRXN3,STXBP5L,PRKCE,GIPC1,SYT13,IL4RA,CACNA1A,LGI3,UNC13B,DDI2,PDPK1,HTR1B,RAB3C,SLC4A8,DGKI,IL1RAPL1,ADRA1A,DRD4,SYK,NOTCH1
GO:BP	positive regulation of transporter activity	GO:0032411	7.08e-10	9.14976	130	1390	31	27543	PLCB1,KCNC1,CALM1,KCNA1,TRPC6,ARC,CACNB3,MYO5A,SHANK3,TESC,CACNG2,CACNB4,ATP1B2,ADRB1,RELN,HCN1,ATP2A1,KCNJ11,STIM2,HTT,RYR2,LRRC38,CACNA2D1,STAC3,ANK2,AKAP6,ANK3,AMIGO1,DRD4,ABCC8,EDNRA
GO:BP	epithelium development	GO:0060429	7.16e-10	9.14483	1260	1390	125	27543	PLCB1,WHRN,SMAD3,ZFP703,WNT4,HEG1,ATP2B2,PAK1,PLXND1,PPP3CA,S1PR1,FMN1,ASTN2,EXPH5,MAF,RILPL1,ERBB4,BMPER,MYO5A,LUZP1,SSBP3,PPP3R1,CCDC88C,E030003E18RIK,SHANK3,EXT1,FN3K,ADAM9,HES3,BRSK2,LMO4,FERMT2,MYO1E,FZD3,HBEGF,MIB1,MICAL2,PLEKHA4,PGR,ZDHHC21,PLEC,CXCL12,FRZB,SHROOM3,AGAP2,SRC,RBPJ,NFE2L1,PLXNA4,SH3BP1,LRP4,TNFRSF19,PTGS2,SCX,MAGI2,BRSK1,WNT10A,LAMA3,FOXP1,DLG1,NKD1,PODXL,ENG,ACVRL1,PTK7,NOT…
GO:BP	neuron migration	GO:0001764	7.5e-10	9.12492	182	1390	37	27543	SCRT1,ACAP3,ASTN2,PHACTR1,CDK5R2,DAB2IP,FBXO31,ZMIZ1,APBB1,PTK2,CTNNA2,SCRT2,FZD3,PTPRZ1,TBC1D24,DAB1,FLRT2,CXCL12,RELN,CDK5R1,FAT3,NTRK2,CELSR2,CEP85L,NTNG2,MYH10,CDKL5,DCLK1,SRF,ASCL1,NTRK3,AXL,NRG3,ARHGEF2,AUTS2,MEF2C,APBB2
GO:BP	negative regulation of transcription by RNA polymerase II	GO:0000122	7.78e-10	9.10917	971	1390	104	27543	SCRT1,NFIC,ZFPM1,SMAD3,JDP2,FGF9,WFS1,CUX2,TRIM37,MAF,DAB2IP,KCNIP3,ZBTB18,CRY2,HEY1,HSPA1B,CXXC5,FOXK1,POU6F1,ZBTB16,BHLHE40,FOXK2,TLE6,KLF16,WWC1,HES3,APBB1,SCRT2,HDAC4,ETV6,FOXO3,NR1D1,CBX6,TLE1,ZFP148,PPARD,HIPK3,RBPJ,USP2,PKIG,NFE2L1,HCFC2,NR2F6,ZBTB34,ZBTB7A,EPAS1,CEBPA,ESRRA,ZBTB7B,TBL1XR1,EGR1,FOXP1,DLG1,ERF,ENG,ZBTB1,FNIP1,NOTCH4,MYT1L,NCOR2,GLI3,MXD1,NACC2,PER1,ASCL1,DDIT3,NFIX,PURB,VHL…
GO:BP	response to chemical	GO:0042221	8.59e-10	9.06586	5880	1390	408	27543	PLCB1,FBXW7,GIT1,CCDC3,LY6E,SMAD3,GRM2,TNNC1,ZFP703,ATF6,SORBS2,GRIN2A,DIO2,KCNC1,NLK,NBL1,CD6,PRKCB,CALM1,WNT4,SLC13A5,KCNA1,TRPC6,BAP1,DLG4,PAK1,FGF9,BRINP1,WFS1,ADCY1,ITPR1,NTN5,CUX2,ATP1A1,PLXND1,CYFIP2,CCNG1,PPP3CA,LRTM2,BOK,CHRDL1,ATP2B1,S1PR1,KIF5C,GABRA1,APLN,ACKR1,ADORA1,SLC25A23,RTN4R,LMTK2,PIP5K1C,RORA,IL11RA1,SLC30A4,RGS7,LIFR,NRXN1,PPP1R9A,LRRC32,SLC6A1,CDK16,SORT1,ERBB4,CDK5R2,SMARC…
GO:BP	blood circulation	GO:0008015	9.36e-10	9.0287	514	1390	68	27543	MGLL,NOS1AP,SMAD3,TNNC1,CALM1,MYL4,MYBPC3,ATP1A1,ATP2B1,APLN,ADORA1,MYLK3,OLFR78,GPR37L1,ADRA1B,SCN1B,EXT1,PTK2,DOCK4,FERMT2,ADRA2C,HDAC4,HBEGF,PDE5A,TPM1,CNR1,RASL10B,ADRB1,ZDHHC21,PLEC,SMPD3,ATP2A1,PPARD,RAP1GDS1,RPS6KA2,EPAS1,PTGS2,TMEM38A,ARHGAP42,CORO2B,TRPM4,KCNN2,DLG1,ENG,PTPRJ,ACVRL1,MYH7,ATP1A2,ARHGAP35,RYR2,CACNA2D1,HTR1B,PPARA,ADRA1A,HOPX,ANK2,EGFR,EDNRB,AKAP6,PRCP,ADM,SLIT2,C2CD4B,ABC…
GO:BP	regulation of MAPK cascade	GO:0043408	1e-09	8.99876	712	1390	84	27543	PLCB1,FBXW7,DUSP7,PAK1,FGF9,IGFBP4,ADORA1,NRXN1,ALOX12B,ERBB4,DAB2IP,BMPER,INPPL1,GPR37L1,DUSP1,ASH1L,RASSF2,ADRA1B,RASGRP1,RAMP3,NPTN,LRRK2,ADAM9,WWC1,SIRPA,PRKCZ,FERMT2,ADRA2C,FGFR3,MAPK9,PDE5A,SYNGAP1,PIN1,NDRG2,CXCL12,ARRB1,SRC,HIPK3,PRKCE,IGFBP6,NTRK2,MADD,TNFRSF19,RB1CC1,DUSP3,EPHA8,DUSP6,KISS1,DLG1,PTPRJ,MAPK8IP1,PER1,NTRK3,GRM4,IGF1R,SPRED1,MAP3K10,KITL,CD44,SORL1,PLA2G5,SPRY2,PIK3R2,DVL3…
GO:BP	response to wounding	GO:0009611	1.23e-09	8.9092	553	1390	71	27543	GIT1,SMAD3,GRIN2A,WNT4,PAK1,RTN4R,TYRO3,PIP5K1C,PTN,SLC1A3,MPL,RTN4RL1,DMTN,CADM4,EXT1,SLC1A2,MYH2,MERTK,PTK2,FERMT2,CTNNA2,ADRA2C,STXBP1,HBEGF,DCBLD2,PRKCA,TPM1,ADRB1,FGFR1OP2,PLEC,PPARD,PPARG,PRKCE,NREP,ABHD2,NEFH,MYH10,KCNK2,SMOC2,ENG,ACVRL1,PTK7,SRF,GLI3,DDIT3,ARHGAP35,NTRK3,LRG1,AXL,IGF1R,CD44,TRIM72,PPARA,SLC4A1,RTN4RL2,GRIN2C,EGFR,PTPRS,PTPRF,PRCP,ST3GAL4,TNFRSF12A,ARHGEF19,ADM,YAP1,ABCC8,…
GO:BP	tissue morphogenesis	GO:0048729	1.39e-09	8.85697	653	1390	79	27543	ZFPM1,LY6E,SMAD3,TNNC1,WNT4,HEG1,PAK1,MYBPC3,PLXND1,S1PR1,FMN1,ASTN2,GCNT4,ERBB4,LUZP1,PPP3R1,ADARB1,E030003E18RIK,SHANK3,EXT1,BRSK2,LMO4,FERMT2,FZD3,HBEGF,MIB1,MICAL2,PLEKHA4,TPM1,PGR,CXCL12,ACTA1,FRZB,SHROOM3,SRC,RBPJ,SH3BP1,SCX,BRSK1,WNT10A,LAMA3,FOXP1,DLG1,NKD1,PODXL,ENG,ACVRL1,PTK7,NOTCH4,MYH7,SRF,GLI3,ARHGAP35,RYR2,LRG1,LGR4,SOCS3,CD44,CSMD1,SPRY2,RSPO2,DVL3,CTHRC1,MEF2C,EGFR,MED1,WNT7B,ADM…
GO:BP	neuron projection organization	GO:0106027	1.63e-09	8.78777	102	1390	27	27543	RPH3A,SIPA1L1,LZTS3,GRIN2A,DLG4,ARC,CUX2,ZMYND8,PPP1R9A,SHANK1,MAP1A,SHANK3,HOMER1,LRRK2,CTNND2,GRIN1,SRCIN1,ZFP365,BAIAP2,RELN,CDK5R1,STAU2,IGF1R,ARHGAP33,TANC1,TANC2,EPHB1
GO:BP	developmental growth involved in morphogenesis	GO:0060560	1.63e-09	8.78675	264	1390	45	27543	MGLL,TTL,NRN1,CPNE9,SYT2,OLFM1,CYFIP2,S1PR1,RIMS1,FMN1,RTN4R,FSTL4,EFNA5,SYT1,EXT1,PRKCZ,CXCL12,DIP2B,CDK5R1,NRN1L,PLXNA4,UNC13A,CDKL5,NKD1,WASF1,PTK7,DCLK1,SRF,NTRK3,SPRY2,AUTS2,TWF2,MED1,PTPRS,WNT7B,TNFRSF12A,SEMA3G,SLIT2,YAP1,SOX9,BCAN,DSCAM,BDNF,NOTCH1,EDNRA
GO:BP	multicellular organismal homeostasis	GO:0048871	1.78e-09	8.75001	533	1390	69	27543	WHRN,DIO2,BAP1,WFS1,S1PR1,APLN,ADORA1,ABHD6,ALOX12B,ERBB4,MAP1A,TFRC,E030003E18RIK,HOMER1,EXT1,ATP1B2,ESRRG,METRNL,ANKRD11,CNR1,HOMER2,NR1D1,ADRB1,ESRRB,PLEC,TUB,SRC,RBPJ,CRTC1,IL4RA,EPAS1,PTGS2,ZBTB7B,SCX,EGR1,ITGAV,MLLT6,RBP4,NOVA1,SRF,NCOR2,DDIT3,VHL,TLE3,INPP5D,CD7,LGR4,PPARGC1A,AKT3,ATF4,SCNN1A,AQP4,AQP6,EGFR,EDNRB,APBB2,GCNT2,WWTR1,PRCP,NR1D2,YAP1,SOX9,ABCC8,DYNC1H1,PTH2R,ACOT11,SYK,NOTCH1,…
GO:BP	negative regulation of molecular function	GO:0044092	1.83e-09	8.73852	1136	1390	115	27543	LYNX1,ARPP19,FBXW7,DGKZ,ZFPM1,LY6E,CALM1,HEG1,WNT9A,DUSP7,WFS1,TRIM37,PPP3CA,SENP2,LMTK2,LYPD6,CACNB3,PHACTR1,SORT1,DKKL1,DAB2IP,AKT2,INPPL1,PTN,PPP1R37,CRY2,DUSP1,HEY1,ADARB1,RAMP3,BHLHE40,TESC,LRRK2,PPP1R9B,PRKAR1B,HR,PRKCZ,PIP4K2C,PTPRT,SRCIN1,HECW1,CPEB2,HDAC4,PTPRB,CNR1,WFDC18,PIN1,NWD1,CIT,APC,PLEC,SERPINI1,ARRB1,SRC,PHACTR3,PPARG,HIPK3,TRIB1,PKIG,TTBK1,PPP1R1B,ZFYVE28,PTGS2,HECW2,DUSP3,MGA…
GO:BP	dendritic spine organization	GO:0097061	1.86e-09	8.73066	95	1390	26	27543	RPH3A,SIPA1L1,LZTS3,GRIN2A,DLG4,ARC,CUX2,ZMYND8,PPP1R9A,SHANK1,SHANK3,HOMER1,LRRK2,CTNND2,GRIN1,SRCIN1,ZFP365,BAIAP2,RELN,CDK5R1,STAU2,IGF1R,ARHGAP33,TANC1,TANC2,EPHB1
GO:BP	positive regulation of biosynthetic process	GO:0009891	1.9e-09	8.72115	2080	1390	179	27543	ARPP19,PLCB1,NFIC,ZFPM1,CCDC3,SMAD3,ATF6,PRKCB,WNT4,CAMTA2,FGF9,CAMK4,TRIM37,PPP3CA,SENP2,S1PR1,APLN,ZMIZ2,RORA,ABHD6,MAF,ERBB4,DAB2IP,AKT2,ZBTB18,LPGAT1,SSBP3,ASH1L,PPP3R1,FOXK1,SLC25A37,HIVEP2,ATXN7L3,ZBTB16,TESC,ACTN4,ZMIZ1,ATMIN,LRRK2,PARM1,FOXK2,WWC1,PLAGL1,HES3,LMO4,APBB1,SSBP4,GRIN1,HDAC4,POU2F2,RAMP1,ESRRG,MAPK9,MICAL2,ZFP91,ATAD2,ETV6,FOXO3,PGR,NR1D1,PIN1,IER5,MGAT4B,TACC1,ESRRB,EGR2,SMP…
GO:BP	positive regulation of apoptotic process	GO:0043065	2e-09	8.69795	583	1390	73	27543	FBXW7,ATF6,GRIN2A,CALM1,OLFM1,ITPR1,BOK,SORT1,DKKL1,DAB2IP,PTN,DUSP1,CDK19,RASSF2,E030003E18RIK,ZBTB16,FBXO32,NET1,APBB1,GRIN1,HDAC4,IL12A,HTRA1,GRIK5,MAPK9,PDE5A,CNR1,FOXO3,PIN1,APC,ADRB1,FRZB,ARRB1,SRC,PPARG,CDK5R1,MAP3K9,ACVR1C,RPS6KA2,PTGS2,EGR1,DUSP6,HTT,MELK,TNFRSF8,FZD9,FNIP1,UNC13B,NACC2,ASCL1,DDIT3,NTRK3,INPP5D,MAP3K10,PCSK9,PPARGC1A,PHLDA1,ATF4,MEF2C,APBB2,PTPRF,S100B,TNFRSF12A,ADM,SLIT…
GO:BP	cellular biosynthetic process	GO:0044249	2.01e-09	8.69586	5701	1390	396	27543	MAP6D1,SCRT1,ARPP19,MGLL,ADCY9,PLCB1,DGKZ,NFIC,ZFPM1,SMAD3,CUX1,KCTD1,TTC7B,ZFP703,ATF6,NLK,ETNK2,PRKCB,WNT4,RASD1,BAP1,JDP2,CAMTA2,FGF9,DPY19L1,CAMK4,WFS1,ADCY1,CUX2,ATP1A1,ZMYND8,TRIM37,PPP3CA,MAN1C1,SENP2,ST3GAL5,S1PR1,ZDHHC8,APLN,GUCY2G,GALNT18,AGMAT,ZMIZ2,PIP5K1C,RORA,MAN2A1,PKNOX2,CDK16,ALOX12B,GCNT4,MAF,DKKL1,ERBB4,FUT9,LPCAT4,PIP5K1B,SMARCD1,DAB2IP,KCNIP3,AKT2,MYO5A,ZBTB18,INPPL1,LPGAT1,M…
GO:BP	blood vessel development	GO:0001568	2.69e-09	8.57001	738	1390	85	27543	FBXW7,PRKCB,WNT4,HEG1,FGF9,PLXND1,S1PR1,APLN,RORA,NRXN1,DAB2IP,BMPER,PTN,LUZP1,HEY1,PPP3R1,ZMIZ1,NRCAM,PTK2,MYO1E,IL12A,RAMP1,HBEGF,MIB1,PTPRB,PRKCA,HS6ST1,EGR2,CXCL12,NRXN3,RBPJ,NTRK2,EPAS1,MAPK14,PTGS2,PLCD3,EGR1,MYH10,ITGAV,SMOC2,ENG,ACVRL1,PTK7,NOTCH4,SRF,GLI3,DDIT3,VHL,LRG1,ISM1,SPRED1,SOCS3,PDPK1,ROCK2,AKT3,SPRY2,PIK3R2,QK,MEF2C,MED1,ITGB8,WNT7B,ADAMTS1,PRCP,SOX18,TNFRSF12A,ADM,SLIT2,YAP1,H…
GO:BP	ossification	GO:0001503	2.84e-09	8.54647	409	1390	58	27543	GIT1,SMAD3,WNT4,PHOSPHO1,FGF9,GPM6B,PPP3CA,CHRDL1,ATP2B1,S1PR1,SORT1,INPPL1,PTN,RASSF2,CLEC11A,RYR1,EXT1,ZBTB16,PTK2,FERMT2,HDAC4,HIRA,EGR2,SMPD3,RBPJ,DHRS3,DMP1,MEF2D,LRP4,MAPK14,PTGS2,CEBPA,ESRRA,SCX,TRPM4,SLC24A3,FZD9,GLI3,LGR4,PLXNB1,ATF4,AXIN2,RSPO2,BMP1,BCOR,CTHRC1,MEF2C,FBXL15,WNT7B,WWTR1,MAPK11,KLF10,YAP1,SOX9,BMP2,FHL2,PTHLH,NOTCH1
GO:BP	negative regulation of macromolecule metabolic process	GO:0010605	3.1e-09	8.5092	3339	1390	257	27543	SCRT1,ARPP19,PLCB1,FBXW7,NFIC,GIT1,ZFPM1,CCDC3,SMAD3,PTPN3,KCTD1,GFRA2,ZNFX1,ZFP703,GRIN2A,OLFM1,WNT4,HEG1,WNT9A,RASD1,DUSP7,BAP1,JDP2,FGF9,WFS1,CUX2,ZMYND8,TRIM37,PPP3CA,SENP2,ATP2B1,APLN,NRXN1,LRRC32,MAF,DAB2IP,KCNIP3,AKT2,ZBTB18,INPPL1,CRY2,MAP1A,DUSP1,RASSF2,HEY1,HSPA1B,UBQLN4,CXXC5,FOXK1,DMTN,CADM4,ADARB1,VGLL4,POU6F1,ZBTB16,BHLHE40,NPTN,LRRK2,PPP1R9B,FOXK2,TLE6,HHATL,KLF16,WWC1,HES3,SIRPA,P…
GO:BP	negative regulation of transcription, DNA-templated	GO:0045892	3.43e-09	8.46459	1375	1390	131	27543	SCRT1,PLCB1,NFIC,ZFPM1,SMAD3,KCTD1,ZFP703,WNT4,RASD1,BAP1,JDP2,FGF9,WFS1,CUX2,ZMYND8,TRIM37,MAF,DAB2IP,KCNIP3,ZBTB18,CRY2,HEY1,HSPA1B,CXXC5,FOXK1,VGLL4,POU6F1,ZBTB16,BHLHE40,FOXK2,TLE6,KLF16,WWC1,HES3,HR,APBB1,CIPC,SCRT2,HDAC4,SCAI,ETV6,FOXO3,NR1D1,CBX6,ESRRB,TLE1,ZFP148,PPARD,SRC,CDK5R1,TBR1,HIPK3,RBPJ,USP2,PKIG,NFE2L1,HCFC2,NR2F6,ZBTB34,ZBTB7A,EPAS1,CEBPA,ESRRA,ZBTB7B,TBL1XR1,SCX,EGR1,FOXP1,DLG…
GO:BP	cellular response to stress	GO:0033554	3.65e-09	8.43765	1866	1390	164	27543	PLCB1,FBXW7,DGKZ,SMAD3,ATF6,ARPP21,WNT4,TRPC6,PAK1,WFS1,ITPR1,CCNG1,BOK,SLC25A23,RTN4R,RORA,GNL1,DAB2IP,PTN,VASN,SPIRE1,GPR37L1,DUSP1,MPL,RASSF2,HSPA1B,RTN4RL1,UBQLN4,CINP,CCDC88C,RASGRP1,FBXO31,ARHGEF10L,ATMIN,LRRK2,BRSK2,SIRPA,NET1,APBB1,PTK2,CTNNA2,SGTB,CPEB2,SLC4A11,FAM168A,MAPK9,ZFP365,TBC1D24,TPM1,FOXO3,IER5,APC,PLEC,SMPD3,CXCL12,ATP2A1,PPARD,CLEC16A,SRC,PPARG,HIPK3,RBPJ,TRIB1,SDF2L1,CPEB4,…
GO:BP	negative regulation of nucleic acid-templated transcription	GO:1903507	3.8e-09	8.41991	1377	1390	131	27543	SCRT1,PLCB1,NFIC,ZFPM1,SMAD3,KCTD1,ZFP703,WNT4,RASD1,BAP1,JDP2,FGF9,WFS1,CUX2,ZMYND8,TRIM37,MAF,DAB2IP,KCNIP3,ZBTB18,CRY2,HEY1,HSPA1B,CXXC5,FOXK1,VGLL4,POU6F1,ZBTB16,BHLHE40,FOXK2,TLE6,KLF16,WWC1,HES3,HR,APBB1,CIPC,SCRT2,HDAC4,SCAI,ETV6,FOXO3,NR1D1,CBX6,ESRRB,TLE1,ZFP148,PPARD,SRC,CDK5R1,TBR1,HIPK3,RBPJ,USP2,PKIG,NFE2L1,HCFC2,NR2F6,ZBTB34,ZBTB7A,EPAS1,CEBPA,ESRRA,ZBTB7B,TBL1XR1,SCX,EGR1,FOXP1,DLG…
GO:BP	regulation of actin filament-based process	GO:0032970	3.87e-09	8.41222	412	1390	58	27543	SMAD3,TNNC1,WNT4,PAK1,ATP1A1,GPM6B,CYFIP2,S1PR1,ADORA1,FMN1,PPP1R9A,MYLK3,SHANK1,SPTBN2,DMTN,EFNA5,SHANK3,SPTB,ARHGEF10L,FAM107A,FERMT2,CTNNA2,BAIAP2,TPM1,SWAP70,CIT,ADRB1,ATP2A1,CDK5R1,PRKCE,SH3BP1,CORO2B,TRPM4,DLG1,MTPN,WASF1,ATP1A2,ARHGAP35,NTRK3,RYR2,STAU2,ROCK2,PIK3R2,ANK2,MEF2C,TWF2,AKAP6,FSCN1,FZD10,BRK1,ADD2,ARHGEF19,SLIT2,FRMD6,ESAM,RGCC,RHPN1,MYH9
GO:BP	lipid metabolic process	GO:0006629	3.89e-09	8.40968	1421	1390	134	27543	MGLL,PLCB1,DGKZ,CCDC3,TTC7B,DIO2,ETNK2,PLCB4,WNT4,ATP1A1,PLCXD2,ST3GAL5,ADORA1,PIP5K1C,RORA,ABHD6,ABCD2,GOLM1,ALOX12B,DKKL1,ERBB4,FUT9,LPCAT4,PIP5K1B,DAB2IP,AKT2,MYO5A,INPPL1,LPGAT1,CYP39A1,DAGLB,CDS1,HSD11B1,E030003E18RIK,PLCH2,LCAT,THRSP,PI4KA,ACSL6,AGPAT3,PIGZ,PIP4K2C,TTC39B,TTC7,FGFR3,MAPK9,SLC35C1,CNR1,NR1D1,ACSS2,SMPD3,STARD3,PDE8B,NEU1,INPP4A,PPARD,STARD4,SRC,PPARG,TUBA8,PRKCE,NFE2L1,DHRS3…
GO:BP	negative regulation of RNA biosynthetic process	GO:1902679	4e-09	8.39762	1378	1390	131	27543	SCRT1,PLCB1,NFIC,ZFPM1,SMAD3,KCTD1,ZFP703,WNT4,RASD1,BAP1,JDP2,FGF9,WFS1,CUX2,ZMYND8,TRIM37,MAF,DAB2IP,KCNIP3,ZBTB18,CRY2,HEY1,HSPA1B,CXXC5,FOXK1,VGLL4,POU6F1,ZBTB16,BHLHE40,FOXK2,TLE6,KLF16,WWC1,HES3,HR,APBB1,CIPC,SCRT2,HDAC4,SCAI,ETV6,FOXO3,NR1D1,CBX6,ESRRB,TLE1,ZFP148,PPARD,SRC,CDK5R1,TBR1,HIPK3,RBPJ,USP2,PKIG,NFE2L1,HCFC2,NR2F6,ZBTB34,ZBTB7A,EPAS1,CEBPA,ESRRA,ZBTB7B,TBL1XR1,SCX,EGR1,FOXP1,DLG…
GO:BP	cellular metal ion homeostasis	GO:0006875	4.09e-09	8.38876	424	1390	59	27543	KCTD17,PRKCB,CALM1,SLC39A10,SLC24A2,ATP2B2,TRPC6,WFS1,ITPR1,ATP1A1,BOK,ATP2B1,ADORA1,SLC25A23,SLC30A4,MYO5A,SLC1A3,JSRP1,MYH7B,TFRC,CLSTN1,JPH3,RYR1,TESC,NPTN,GRIN1,TTC7,ATP1B2,ATP2A1,PYGM,PRKCE,RAP1GDS1,STIM2,TMEM38A,CACNA1A,HTT,ITGAV,SLC24A3,FZD9,ATP1A2,DDIT3,SLC39A14,CALB1,RYR2,PDPK1,SLC8A2,HTR1B,ATF4,SCNN1A,ANK2,AKAP6,ITPR2,ALAS2,XK,S100B,HERPUD1,ANKRD9,CCDC22,EDNRA
GO:BP	positive regulation of transcription, DNA-templated	GO:0045893	4.15e-09	8.38211	1688	1390	152	27543	PLCB1,NFIC,ZFPM1,SMAD3,ATF6,PRKCB,WNT4,CAMTA2,FGF9,CAMK4,TRIM37,PPP3CA,SENP2,S1PR1,APLN,ZMIZ2,RORA,MAF,ERBB4,DAB2IP,AKT2,ZBTB18,SSBP3,ASH1L,PPP3R1,FOXK1,HIVEP2,ATXN7L3,ZBTB16,TESC,ACTN4,ZMIZ1,ATMIN,FOXK2,WWC1,PLAGL1,HES3,LMO4,APBB1,SSBP4,GRIN1,HDAC4,POU2F2,ESRRG,MAPK9,MICAL2,ZFP91,ATAD2,ETV6,FOXO3,PGR,NR1D1,PIN1,IER5,TACC1,ESRRB,EGR2,ZFP148,AGAP2,PPARD,ARRB1,SRC,PPARG,TBR1,CITED4,RBPJ,CRTC1,PSRC1…
GO:BP	positive regulation of nucleic acid-templated transcription	GO:1903508	4.15e-09	8.38211	1688	1390	152	27543	PLCB1,NFIC,ZFPM1,SMAD3,ATF6,PRKCB,WNT4,CAMTA2,FGF9,CAMK4,TRIM37,PPP3CA,SENP2,S1PR1,APLN,ZMIZ2,RORA,MAF,ERBB4,DAB2IP,AKT2,ZBTB18,SSBP3,ASH1L,PPP3R1,FOXK1,HIVEP2,ATXN7L3,ZBTB16,TESC,ACTN4,ZMIZ1,ATMIN,FOXK2,WWC1,PLAGL1,HES3,LMO4,APBB1,SSBP4,GRIN1,HDAC4,POU2F2,ESRRG,MAPK9,MICAL2,ZFP91,ATAD2,ETV6,FOXO3,PGR,NR1D1,PIN1,IER5,TACC1,ESRRB,EGR2,ZFP148,AGAP2,PPARD,ARRB1,SRC,PPARG,TBR1,CITED4,RBPJ,CRTC1,PSRC1…
GO:BP	response to organic cyclic compound	GO:0014070	4.32e-09	8.36434	1123	1390	113	27543	PLCB1,GRM2,ZFP703,CALM1,DLG4,PAK1,ADCY1,ITPR1,ATP1A1,ATP2B1,GABRA1,ADORA1,RORA,SLC6A1,AKT2,OLFR78,GABRB2,CRY2,SLC1A3,NR3C1,PAQR8,DMTN,EFNA5,RAMP3,RYR1,HOMER1,ZMIZ1,LRRK2,LCAT,SLC1A2,PPP1R9B,FAM107A,ADAM9,FBXO32,KLF16,CTNNA2,GRIN1,STXBP1,GABRG2,ESRRG,CNR1,FOXO3,HOMER2,PGR,ESRRB,ACTA1,HCN1,PYGM,SRC,PPARG,KCNJ11,PRKCE,NFE2L1,NTRK2,PPP1R1B,ZBTB7A,GRAMD1B,ABHD2,PTGS2,TMEM38A,CEBPA,ESRRA,TRPM4,EGR1,DUS…
GO:BP	modulation of excitatory postsynaptic potential	GO:0098815	4.83e-09	8.31614	57	1390	20	27543	GRIN2A,DLG4,CUX2,ZMYND8,CACNB3,NRXN1,STX1B,SHANK1,SHANK3,LRRK2,PRKAR1B,PRKCZ,GRIN1,TBC1D24,BAIAP2,PCLO,RELN,IGSF11,SLC8A2,DRD4
GO:BP	regulation of cell growth	GO:0001558	4.89e-09	8.31111	449	1390	61	27543	MGLL,TTL,SMAD3,CPNE9,SYT2,OLFM1,BAP1,RIMS1,IGFBP4,RTN4R,FSTL4,DAB2IP,HSPA1B,CLSTN1,VGLL4,EFNA5,SYT1,PPP1R9B,FAM107A,DACT3,PTK2,HBEGF,DCBLD2,PIN1,ADRB1,CXCL12,DIP2B,FRZB,PPARD,PPARG,CDK5R1,PSRC1,PLXNA4,UNC13A,CDKL5,FOXP1,MTPN,SMARCA2,GAS2L1,EXTL3,PTPRJ,ACVRL1,CGRRF1,SRF,NTRK3,SERTAD1,PPARA,CDHR2,EGFR,TWF2,AKAP6,PTPRS,TNFRSF12A,SEMA3G,SLIT2,YAP1,DSCAM,BDNF,SMARCA4,PTCH2,INHBA
GO:BP	positive regulation of RNA biosynthetic process	GO:1902680	5.46e-09	8.26283	1694	1390	152	27543	PLCB1,NFIC,ZFPM1,SMAD3,ATF6,PRKCB,WNT4,CAMTA2,FGF9,CAMK4,TRIM37,PPP3CA,SENP2,S1PR1,APLN,ZMIZ2,RORA,MAF,ERBB4,DAB2IP,AKT2,ZBTB18,SSBP3,ASH1L,PPP3R1,FOXK1,HIVEP2,ATXN7L3,ZBTB16,TESC,ACTN4,ZMIZ1,ATMIN,FOXK2,WWC1,PLAGL1,HES3,LMO4,APBB1,SSBP4,GRIN1,HDAC4,POU2F2,ESRRG,MAPK9,MICAL2,ZFP91,ATAD2,ETV6,FOXO3,PGR,NR1D1,PIN1,IER5,TACC1,ESRRB,EGR2,ZFP148,AGAP2,PPARD,ARRB1,SRC,PPARG,TBR1,CITED4,RBPJ,CRTC1,PSRC1…
GO:BP	divalent inorganic cation homeostasis	GO:0072507	5.51e-09	8.25891	359	1390	53	27543	KCTD17,PRKCB,CALM1,SLC39A10,KCNA1,SLC24A2,ATP2B2,TRPC6,WFS1,ITPR1,BOK,ATP2B1,ADORA1,SLC25A23,SLC30A4,MYO5A,JSRP1,MYH7B,CLSTN1,JPH3,RYR1,NPTN,GRIN1,ATP2A1,PYGM,PRKCE,RAP1GDS1,STIM2,TMEM38A,CACNA1A,HTT,ITGAV,SLC24A3,FZD9,DDIT3,SLC39A14,CALB1,RYR2,PDPK1,SLC8A2,HTR1B,ATF4,ANK2,EGFR,AKAP6,ITPR2,XK,ANK3,S100B,ADM,FAM20A,HERPUD1,EDNRA
GO:BP	negative regulation of nucleobase-containing compound metabolic process	GO:0045934	5.63e-09	8.24917	1620	1390	147	27543	SCRT1,PLCB1,NFIC,GIT1,ZFPM1,SMAD3,KCTD1,ZFP703,WNT4,RASD1,BAP1,JDP2,FGF9,WFS1,CUX2,ZMYND8,TRIM37,PPP3CA,MAF,DAB2IP,KCNIP3,AKT2,ZBTB18,INPPL1,CRY2,DUSP1,HEY1,HSPA1B,UBQLN4,CXXC5,FOXK1,VGLL4,POU6F1,ZBTB16,BHLHE40,FOXK2,TLE6,KLF16,WWC1,HES3,HR,APBB1,CIPC,SCRT2,HDAC4,SCAI,ETV6,FOXO3,NR1D1,CBX6,ESRRB,TLE1,ZFP148,PPARD,SRC,PKP1,PPARG,CDK5R1,TBR1,HIPK3,RBPJ,USP2,PKIG,NFE2L1,HCFC2,NR2F6,ZBTB34,ZBTB7A,EPA…
GO:BP	regulation of organelle organization	GO:0033043	5.73e-09	8.24159	1142	1390	114	27543	MAP6D1,PLCB1,FBXW7,SIPA1L1,GIT1,ASAP1,SMAD3,KCTD17,WNT4,PAK1,GPM6B,ZMYND8,TRIM37,CYFIP2,BOK,S1PR1,FMN1,INF2,ARHGEF9,NRXN1,TBC1D30,PPP1R9A,SYNE1,CPLX2,AKT2,MYLK3,SHANK1,SPIRE1,SPTBN2,MAP1A,DUSP1,TFRC,HSPA1B,PRRT2,UBQLN4,PTPRD,DMTN,EFNA5,SYT1,SHANK3,SPTB,ARHGEF10L,ATMIN,LRRK2,FAM107A,PIP4K2C,FERMT2,CTNNA2,STXBP1,NAV3,GRIK5,ANK1,MAPK9,BAIAP2,TPM1,SWAP70,CIT,APC,SMPD3,CLEC16A,SRC,CDK5R1,PRKCE,PSRC1,N…
GO:BP	negative regulation of cell differentiation	GO:0045596	5.86e-09	8.23195	788	1390	88	27543	FBXW7,ZFPM1,SMAD3,WNT4,WNT9A,LINGO1,TRPC6,JDP2,FGF9,BRINP1,PPP3CA,RTN4R,RORA,FSTL4,SORT1,DAB2IP,PTN,VASN,CNTN4,GPR37L1,DMTN,EFNA5,ZBTB16,ACTN4,DACT3,HES3,APBB1,CXCL14,PTK2,FERMT2,HDAC4,MIB1,SYNGAP1,FOXO3,NR1D1,DAB1,ESRRB,DIP2B,FRZB,PPARD,CDK5R1,RBPJ,TRIB1,LRP4,IL4RA,ZBTB7B,TRPM4,FOXP1,ITGAV,LMO2,GAS2L1,ACVRL1,NOTCH4,NCOR2,GLI3,ASCL1,DDIT3,VHL,NTRK3,INPP5D,SPRED1,TRIM72,SORL1,ARHGEF2,SOX6,SPRY2,PP…
GO:BP	cellular response to organic cyclic compound	GO:0071407	6.3e-09	8.2009	698	1390	81	27543	PLCB1,ZFP703,PAK1,ADCY1,ITPR1,ATP1A1,ATP2B1,GABRA1,RORA,AKT2,OLFR78,GABRB2,CRY2,SLC1A3,NR3C1,PAQR8,DMTN,EFNA5,RAMP3,RYR1,ZMIZ1,LRRK2,SLC1A2,PPP1R9B,FAM107A,FBXO32,KLF16,GABRG2,ESRRG,FOXO3,PGR,ESRRB,HCN1,SRC,PPARG,NFE2L1,NTRK2,PPP1R1B,ZBTB7A,GRAMD1B,ABHD2,PTGS2,TMEM38A,CEBPA,ESRRA,TRPM4,EGR1,PIM1,FOXP1,MYOD1,NCOR2,ATP1A2,KLF9,PER1,RYR2,EPHX1,IGF1R,CHRM4,SNW1,ROCK2,HTR1B,PPARA,ATF4,AXIN2,SCNN1A,HTR…
GO:BP	regulation of Wnt signaling pathway	GO:0030111	6.53e-09	8.18496	306	1390	48	27543	SMAD3,ZFP703,NLK,FGF9,LYPD6,DKKL1,DAB2IP,CCDC88C,VGLL4,LRRK2,CTNND2,TLE6,DACT3,CSNK1G2,PLEKHA4,FOXO3,PIN1,APC,TLE1,FRZB,SRC,RBPJ,FAM53B,LRP4,MAPK14,TMEM198,TBL1XR1,TRPM4,EGR1,NKD1,PTK7,FZD9,GLI3,DDIT3,TLE3,LGR4,TMEM170B,AXIN2,RSPO2,CTHRC1,EGFR,WWTR1,YAP1,SOX9,BMP2,SMARCA4,NOTCH1,ALPK2
GO:BP	regulation of developmental growth	GO:0048638	6.74e-09	8.17154	372	1390	54	27543	MGLL,TTL,PLCB1,CPNE9,SYT2,OLFM1,FGF9,RIMS1,RTN4R,FSTL4,ERBB4,VGLL4,EFNA5,SYT1,WWC1,PTK2,PIN1,ADRB1,DIO3,CXCL12,DIP2B,PPARD,CDK5R1,RBPJ,PLXNA4,MAPK14,UNC13A,DUSP6,PIM1,KCNK2,CDKL5,FOXP1,DLG1,NKD1,MYOD1,RBP4,SRF,NTRK3,GPAM,PPARA,HOPX,MEF2C,TWF2,AKAP6,PTPRS,MAPK11,TNFRSF12A,SEMA3G,SLIT2,YAP1,DSCAM,BDNF,NOTCH1,GPR21
GO:BP	positive regulation of synaptic transmission	GO:0050806	7.72e-09	8.1122	329	1390	50	27543	SNAP25,GRIN2A,RIMS3,SLC24A2,DLG4,ARC,ADCY1,ADORA1,NRXN1,PPP1R9A,GRIA4,ERBB4,STX1B,PTN,SLC1A3,CLSTN1,SYT1,SHANK3,NPTN,SYT12,FAM107A,PRKAR1B,PRKCZ,PTK2,STXBP1,CACNG2,CACNB4,CNR1,ADRB1,RELN,PRKCE,CRTC1,NTRK2,ZDHHC2,UNC13A,PTGS2,KISS1,AKAP5,MPP2,IGSF11,CALB1,SHANK2,SLC8A2,HTR6,SLC4A8,ADRA1A,GRIN2C,EGFR,S100B,CRH
GO:BP	positive regulation of nervous system development	GO:0051962	7.77e-09	8.1093	340	1390	51	27543	CUX2,PLXND1,LRTM2,SYNDIG1,MAN2A1,NRXN1,PTN,PTPRD,CLSTN1,EFNA5,SHANK3,FBXO31,NPTN,TLE6,PTK2,FZD3,PTPRZ1,ZFP365,TBC1D24,BAIAP2,FLRT2,EGR2,CXCL12,RELN,PPARG,TRAK1,PLXNA4,NTRK2,AKAP5,CDKL5,NUMB,SRF,GLI3,SLITRK1,ASCL1,NTRK3,METRN,STAU2,PLXNB1,QK,EGFR,TWF2,PTPRF,TNFRSF12A,AMIGO1,EPHB1,DSCAM,BMP2,BDNF,NEURL1A,NOTCH1
GO:BP	actin filament-based movement	GO:0030048	8.59e-09	8.06575	125	1390	29	27543	TNNC1,ATP1A1,ADORA1,MYO5C,MYO5A,MYRIP,CCDC88C,SCN1B,ACTN4,MYH2,MYO1E,TPM1,ADRB1,ATP2A1,TRPM4,MYH10,KCNN2,DLG1,SUN2,WIPF2,MYH7,ATP1A2,RYR2,CACNA2D1,MYO1B,ANK2,AKAP6,FRMD6,MYH9
GO:BP	regulation of signaling receptor activity	GO:0010469	9.26e-09	8.03325	169	1390	34	27543	LYNX1,RPH3A,FBXW7,LY6E,GRIN2A,DLG4,ARC,DLGAP3,DLGAP1,ADORA1,LYPD6,NRXN1,NETO2,DKKL1,SHANK1,RAMP3,SHANK3,HOMER1,ADRA2C,CACNG2,HBEGF,RELN,SRC,CDK5R1,ZFYVE28,LYPD1,PCSK9,PPARGC1A,PPARA,DLGAP4,MEF2C,NPTX1,NEURL1A,CRH
GO:BP	negative regulation of cellular biosynthetic process	GO:0031327	9.85e-09	8.00653	1677	1390	150	27543	SCRT1,PLCB1,NFIC,ZFPM1,SMAD3,KCTD1,ZFP703,WNT4,RASD1,BAP1,JDP2,FGF9,WFS1,CUX2,ATP1A1,ZMYND8,TRIM37,MAF,DKKL1,DAB2IP,KCNIP3,ZBTB18,CRY2,DUSP1,HEY1,HSPA1B,CXXC5,FOXK1,VGLL4,POU6F1,ZBTB16,BHLHE40,FOXK2,TLE6,HHATL,KLF16,WWC1,HES3,SIRPA,HR,APBB1,CIPC,SCRT2,CPEB2,HDAC4,HBEGF,SCAI,ETV6,FOXO3,NR1D1,CBX6,ESRRB,TLE1,PDE8B,ZFP148,PPARD,SRC,PPARG,CDK5R1,TBR1,HIPK3,RBPJ,USP2,PKIG,CPEB4,NFE2L1,HCFC2,NR2F6,MFSD…
GO:BP	regulation of protein localization to membrane	GO:1905475	1.09e-08	7.96386	198	1390	37	27543	SORBS2,DLG4,ZMYND8,IQSEC2,CACNB3,NRXN1,DPP10,AKT2,MYO5A,PTN,RAPGEF4,DMTN,RAMP3,SHANK3,PPP1R9B,PRKCZ,CACNG2,CDK5R1,KCNJ11,LRP4,ZDHHC2,MTCL1,MAGI2,LRP1,AKAP5,DLG1,NUMB,FZD9,ACSL3,LYPD1,DDI2,PDPK1,PIK3R2,STAC3,EGFR,VTI1B,ANK3
GO:BP	positive regulation of cellular biosynthetic process	GO:0031328	1.1e-08	7.95811	2030	1390	173	27543	ARPP19,PLCB1,NFIC,ZFPM1,SMAD3,ATF6,PRKCB,WNT4,CAMTA2,FGF9,CAMK4,TRIM37,PPP3CA,SENP2,S1PR1,APLN,ZMIZ2,RORA,MAF,ERBB4,DAB2IP,AKT2,ZBTB18,LPGAT1,SSBP3,ASH1L,PPP3R1,FOXK1,SLC25A37,HIVEP2,ATXN7L3,ZBTB16,TESC,ACTN4,ZMIZ1,ATMIN,PARM1,FOXK2,WWC1,PLAGL1,HES3,LMO4,APBB1,SSBP4,GRIN1,HDAC4,POU2F2,RAMP1,ESRRG,MAPK9,MICAL2,ZFP91,ATAD2,ETV6,FOXO3,PGR,NR1D1,PIN1,IER5,MGAT4B,TACC1,ESRRB,EGR2,SMPD3,ZFP148,AGAP2,PP…
GO:BP	positive regulation of transcription by RNA polymerase II	GO:0045944	1.22e-08	7.91485	1284	1390	123	27543	NFIC,ZFPM1,SMAD3,ATF6,CAMTA2,PPP3CA,SENP2,S1PR1,ZMIZ2,RORA,MAF,DAB2IP,AKT2,ZBTB18,SSBP3,ASH1L,PPP3R1,HIVEP2,ZMIZ1,ATMIN,FOXK2,PLAGL1,HES3,LMO4,APBB1,SSBP4,GRIN1,HDAC4,POU2F2,ESRRG,MICAL2,ZFP91,ATAD2,ETV6,FOXO3,PGR,NR1D1,PIN1,IER5,ESRRB,EGR2,ZFP148,AGAP2,PPARD,ARRB1,PPARG,TBR1,RBPJ,CRTC1,NFE2L1,CSRNP1,MEF2D,ZBTB17,EPAS1,MAPK14,CEBPA,ESRRA,ZBTB7B,TBL1XR1,SCX,ELL2,EGR1,FOXP1,LMO2,SMARCA2,NPAS2,MYOD1…
GO:BP	positive regulation of protein kinase activity	GO:0045860	1.24e-08	7.90828	412	1390	57	27543	FBXW7,CAMKK2,DLG4,PAK1,ADORA1,NRXN1,PPP1R9A,CDK5R2,DAB2IP,INCENP,RASSF2,RASGRP1,LRRK2,ADAM9,PRKCZ,PTK2,FERMT2,ADRA2C,SRCIN1,HBEGF,PDE5A,ZFP91,DAB1,RELN,AGAP2,SRC,CDK5R1,PSRC1,TTBK1,MAP3K14,EGR1,PIM1,MAS1,DLG1,NTRK3,STRADB,MAP3K10,KITL,PDPK1,OSBPL8,SPRY2,SLC8A2,AXIN2,DVL3,ADRA1A,MEF2C,EGFR,AKAP6,FZD10,FAM20A,DRD4,CDC25B,BMP2,RGCC,NEURL1A,SYK,ADAM8
GO:BP	negative regulation of RNA metabolic process	GO:0051253	1.27e-08	7.89604	1489	1390	137	27543	SCRT1,PLCB1,NFIC,ZFPM1,SMAD3,KCTD1,ZFP703,WNT4,RASD1,BAP1,JDP2,FGF9,WFS1,CUX2,ZMYND8,TRIM37,PPP3CA,MAF,DAB2IP,KCNIP3,AKT2,ZBTB18,CRY2,HEY1,HSPA1B,CXXC5,FOXK1,VGLL4,POU6F1,ZBTB16,BHLHE40,FOXK2,TLE6,KLF16,WWC1,HES3,HR,APBB1,CIPC,SCRT2,HDAC4,SCAI,ETV6,FOXO3,NR1D1,CBX6,ESRRB,TLE1,ZFP148,PPARD,SRC,PKP1,CDK5R1,TBR1,HIPK3,RBPJ,USP2,PKIG,NFE2L1,HCFC2,NR2F6,ZBTB34,ZBTB7A,EPAS1,CEBPA,ESRRA,ZBTB7B,TBL1XR1,S…
GO:BP	lipid biosynthetic process	GO:0008610	1.29e-08	7.88844	682	1390	79	27543	MGLL,DGKZ,CCDC3,TTC7B,ETNK2,WNT4,ATP1A1,PIP5K1C,ABHD6,ALOX12B,DKKL1,ERBB4,FUT9,LPCAT4,PIP5K1B,MYO5A,INPPL1,LPGAT1,CYP39A1,DAGLB,CDS1,HSD11B1,E030003E18RIK,LCAT,THRSP,PI4KA,ACSL6,AGPAT3,PIGZ,PIP4K2C,TTC7,MAPK9,NR1D1,ACSS2,SMPD3,STARD3,PDE8B,INPP4A,PPARD,STARD4,ST3GAL2,ABHD2,ABHD8,PTGS2,CLCN2,EGR1,GAL3ST3,PGS1,FAM126B,ST8SIA5,CYP11A1,ACSL3,FASN,DGAT2L6,B4GALNT1,LIPG,SREBF2,HSD17B7,IGF1R,ABHD3,SOCS3…
GO:BP	positive regulation of macromolecule biosynthetic process	GO:0010557	1.31e-08	7.88438	1911	1390	165	27543	PLCB1,NFIC,ZFPM1,SMAD3,ATF6,PRKCB,WNT4,CAMTA2,FGF9,CAMK4,TRIM37,PPP3CA,SENP2,S1PR1,APLN,ZMIZ2,RORA,MAF,ERBB4,DAB2IP,AKT2,ZBTB18,SSBP3,ASH1L,PPP3R1,FOXK1,SLC25A37,HIVEP2,ATXN7L3,ZBTB16,TESC,ACTN4,ZMIZ1,ATMIN,LRRK2,PARM1,FOXK2,WWC1,PLAGL1,HES3,LMO4,APBB1,SSBP4,GRIN1,HDAC4,POU2F2,RAMP1,ESRRG,MAPK9,MICAL2,ZFP91,ATAD2,ETV6,FOXO3,PGR,NR1D1,PIN1,IER5,MGAT4B,TACC1,ESRRB,EGR2,ZFP148,AGAP2,PPARD,ARRB1,SRC,…
GO:BP	adult behavior	GO:0030534	1.31e-08	7.8826	171	1390	34	27543	GRM2,NRXN1,SHANK1,SPTBN2,GLRB,PREX2,SHANK3,HOMER1,SLC1A2,GRIN1,GABRG2,CACNB4,LGI4,KCNJ10,HOMER2,DAB1,CXCL12,NRXN3,PPP1R1B,CACNA1A,OXR1,OPRD1,SDK1,ATP1A2,SLITRK1,SHANK2,PPARA,ADAM22,AGTPBP1,HIPK2,DRD4,ZFHX2,BDNF,SEZ6L
GO:BP	system process	GO:0003008	1.65e-08	7.78325	3325	1390	253	27543	MGLL,GABRD,PLCB1,GIT1,WHRN,NOS1AP,SMAD3,TNNC1,SNAP25,ATF6,SORBS2,GRIN2A,KCNA2,CALM1,HEG1,KCNA1,SLC24A2,CACNA1I,MYL4,ATP2B2,DLG4,CAMTA2,BRINP1,CAMK4,ARC,WFS1,ADCY1,ITPR1,CUX2,MYBPC3,ATP1A1,ZMYND8,PPP3CA,DLGAP3,DLGAP1,ATP2B1,S1PR1,RBFOX1,GABRA1,APLN,ADORA1,CACNB3,NRXN1,PPP1R9A,SLC6A1,STX1B,KCNIP3,MYO5A,MYLK3,OLFR78,PTN,CNTNAP1,SHANK1,RAPGEF4,GABRB2,CRY2,MAP1A,SLC1A3,GPR37L1,JSRP1,PRRT2,KCNH1,ADARB1…
GO:BP	positive regulation of cation channel activity	GO:2001259	1.67e-08	7.77656	81	1390	23	27543	KCNC1,CALM1,KCNA1,ARC,CACNB3,SHANK3,CACNG2,CACNB4,ADRB1,RELN,HCN1,KCNJ11,STIM2,HTT,LRRC38,CACNA2D1,STAC3,ANK2,AKAP6,ANK3,AMIGO1,ABCC8,EDNRA
GO:BP	negative regulation of biosynthetic process	GO:0009890	1.75e-08	7.75667	1720	1390	152	27543	SCRT1,PLCB1,NFIC,ZFPM1,CCDC3,SMAD3,KCTD1,ZFP703,WNT4,RASD1,BAP1,JDP2,FGF9,WFS1,CUX2,ATP1A1,ZMYND8,TRIM37,MAF,DKKL1,DAB2IP,KCNIP3,ZBTB18,CRY2,DUSP1,HEY1,HSPA1B,CXXC5,FOXK1,VGLL4,POU6F1,ZBTB16,BHLHE40,FOXK2,TLE6,HHATL,KLF16,WWC1,HES3,SIRPA,HR,APBB1,CIPC,SCRT2,CPEB2,HDAC4,HBEGF,SCAI,ETV6,FOXO3,NR1D1,CBX6,ESRRB,TLE1,SMPD3,PDE8B,ZFP148,PPARD,SRC,PPARG,CDK5R1,TBR1,HIPK3,RBPJ,USP2,PKIG,CPEB4,NFE2L1,HCFC…
GO:BP	rhythmic process	GO:0048511	1.89e-08	7.72319	348	1390	51	27543	FBXW7,GRIN2A,KCNA2,ADCY1,ADORA1,TYRO3,RORA,PTN,CRY2,HOMER1,BHLHE40,MAPK10,CIPC,GRIN1,MAPK9,FOXO3,PGR,NR1D1,ADRB1,ARRB1,SRC,PPARG,CDK5R1,USP2,CRTC1,NTRK2,NR2F6,EGR1,KISS1,NCOR2,KLF9,CORT,PER1,NTRK3,AXL,IGF1R,LGR4,PPARGC1A,PPARA,ATF4,EGFR,ADAMTS1,AHR,NR1D2,SLIT2,KLF10,NRIP1,SCHIP1,DRD4,BDNF,INHBA
GO:BP	positive regulation of neurogenesis	GO:0050769	1.95e-08	7.71064	283	1390	45	27543	CUX2,PLXND1,MAN2A1,PTN,PTPRD,EFNA5,SHANK3,FBXO31,NPTN,TLE6,PTK2,FZD3,PTPRZ1,ZFP365,TBC1D24,BAIAP2,EGR2,CXCL12,RELN,PPARG,TRAK1,PLXNA4,NTRK2,AKAP5,CDKL5,NUMB,SRF,GLI3,SLITRK1,ASCL1,NTRK3,METRN,STAU2,PLXNB1,QK,EGFR,TWF2,PTPRF,TNFRSF12A,AMIGO1,DSCAM,BMP2,BDNF,NEURL1A,NOTCH1
GO:BP	peptidyl-amino acid modification	GO:0018193	2.5e-08	7.60225	1298	1390	123	27543	MAP6D1,TTL,FBXW7,NOS1AP,NLK,PRKCB,TTLL11,TRPC6,DLG4,PAK1,DPY19L1,MAST3,SENP2,ZDHHC8,ADORA1,LMTK2,TYRO3,NRXN1,ERBB4,AKT2,TFRC,ASH1L,RASSF2,TTLL7,DMTN,CADM4,EFNA5,RAMP3,GOLGA7B,ATXN7L3,ZMIZ1,LRRK2,ASPHD2,BRSK2,PRKCZ,MERTK,APBB1,PTK2,CSNK1G2,SRCIN1,HDAC4,FGFR3,IL12A,HBEGF,MAPK9,PTPRZ1,TBC1D24,CAMK1G,PRKCA,TTLL3,MAPK12,PIN1,PTPN4,ZDHHC21,EGR2,DIP2B,RELN,ARRB1,SRC,CDK5R1,HIPK3,RANBP2,PRKCE,TTBK1,NTRK2…
GO:BP	actin filament bundle assembly	GO:0051017	2.69e-08	7.56975	166	1390	33	27543	SMAD3,WNT4,PAK1,S1PR1,PHACTR1,PPP1R9A,SHANK1,SPIRE1,DMTN,SHANK3,ARHGEF10L,ACTN4,FAM107A,FERMT2,BAIAP2,TPM1,SWAP70,ARRB1,SRC,CORO2B,MYH10,ACTN1,SRF,FAM171A1,PDLIM1,MYO1B,ROCK2,PIK3R2,FSCN1,ESPNL,ADD2,RGCC,RHPN1
GO:BP	cellular response to transforming growth factor beta stimulus	GO:0071560	2.74e-08	7.56162	244	1390	41	27543	SMAD3,ZFP703,NLK,WNT4,LRRC32,VASN,ZMIZ1,ADAM9,PTK2,FERMT2,HTRA1,PIN1,SRC,NREP,RASL11B,GIPC1,ZBTB7A,ACVR1C,SCX,WNT10A,ENG,ACVRL1,PEG10,LRG1,IGF1R,SPRED1,SNW1,PDPK1,SOX5,PPARGC1A,SOX6,SPRY2,PPARA,MEF2C,ADAMTSL2,GCNT2,ITGB8,HIPK2,DUSP22,SOX9,BMP2
GO:BP	vasculature development	GO:0001944	2.76e-08	7.55949	771	1390	85	27543	FBXW7,PRKCB,WNT4,HEG1,FGF9,PLXND1,S1PR1,APLN,RORA,NRXN1,DAB2IP,BMPER,PTN,LUZP1,HEY1,PPP3R1,ZMIZ1,NRCAM,PTK2,MYO1E,IL12A,RAMP1,HBEGF,MIB1,PTPRB,PRKCA,HS6ST1,EGR2,CXCL12,NRXN3,RBPJ,NTRK2,EPAS1,MAPK14,PTGS2,PLCD3,EGR1,MYH10,ITGAV,SMOC2,ENG,ACVRL1,PTK7,NOTCH4,SRF,GLI3,DDIT3,VHL,LRG1,ISM1,SPRED1,SOCS3,PDPK1,ROCK2,AKT3,SPRY2,PIK3R2,QK,MEF2C,MED1,ITGB8,WNT7B,ADAMTS1,PRCP,SOX18,TNFRSF12A,ADM,SLIT2,YAP1,H…
GO:BP	negative regulation of intracellular signal transduction	GO:1902532	2.79e-08	7.55385	516	1390	65	27543	DGKZ,GIT1,HEG1,DUSP7,SEC14L1,WFS1,ITPR1,RORA,DAB2IP,INPPL1,DUSP1,ASH1L,RASSF2,OTUD3,VGLL4,LRRK2,WWC1,SIRPA,SCAI,SYNGAP1,HOMER2,NR1D1,PIN1,CIT,NDRG2,TLE1,CXCL12,ARRB1,SRC,HIPK3,RNF152,SH3BP1,MAPK14,PTGS2,ARHGAP42,DUSP3,MAGI2,DUSP6,DLG1,PTPRJ,FNIP1,MAPK8IP1,PER1,DDIT3,ARHGAP35,IGF1R,SPRED1,CD44,SORL1,TNFAIP8L1,SPRY2,SHANK2,PPARA,PIK3R2,ADRA1A,SLA2,SLIT2,ARHGAP25,DEPTOR,HERPUD1,BMP2,FHL2,ACKR3,CDC34…
GO:BP	developmental cell growth	GO:0048588	2.86e-08	7.54409	265	1390	43	27543	MGLL,TTL,NRN1,CPNE9,SYT2,SORBS2,OLFM1,CYFIP2,RIMS1,RTN4R,FSTL4,EFNA5,SYT1,EXT1,PRKCZ,PIN1,ADRB1,CXCL12,DIP2B,CDK5R1,NRN1L,PLXNA4,UNC13A,CDKL5,FOXP1,WASF1,DCLK1,SRF,NTRK3,PPARA,AUTS2,ADRA1A,TWF2,AKAP6,PTPRS,TNFRSF12A,SEMA3G,SLIT2,SOX9,BCAN,DSCAM,BDNF,EDNRA
GO:BP	positive regulation of excitatory postsynaptic potential	GO:2000463	3e-08	7.52283	38	1390	16	27543	GRIN2A,DLG4,CUX2,CACNB3,NRXN1,STX1B,SHANK1,SHANK3,PRKAR1B,PRKCZ,GRIN1,TBC1D24,BAIAP2,RELN,IGSF11,DRD4
GO:BP	positive regulation of transmembrane transport	GO:0034764	3.01e-08	7.52113	255	1390	42	27543	PLCB1,KCNC1,CALM1,KCNA1,TRPC6,ARC,CACNB3,RGS7,ERBB4,AKT2,MYO5A,RAMP3,SHANK3,TESC,SLC1A2,ACSL6,GRIN1,CACNG2,CACNB4,ATP1B2,ADRB1,RELN,HCN1,ATP2A1,KCNJ11,STIM2,MAPK14,AKAP5,HTT,RYR2,LRRC38,PDPK1,OSBPL8,CACNA2D1,STAC3,ANK2,AKAP6,ANK3,AMIGO1,DRD4,ABCC8,EDNRA
GO:BP	positive regulation of protein localization	GO:1903829	3.16e-08	7.50071	481	1390	62	27543	FBXW7,DLG4,EXPH5,CACNB3,NRXN1,DPP10,ERBB4,AKT2,MYO5A,OLFR78,PTN,RAPGEF4,MYRIP,MAP1A,TFRC,ABHD17A,RAMP3,MYO18A,NPTN,PPP1R9B,ADAM9,PRKCZ,APBB1,FERMT2,CACNG2,CACNB4,APC,ADRB1,PPARD,ARRB1,SRC,PPARG,CDK5R1,KCNJ11,PRKCE,LRP4,ZDHHC2,MTCL1,MAPK14,PTGS2,CORO2B,LRP1,TRPM4,MYH10,AKAP5,DLG1,RBP4,ACSL3,GLI3,UNC13B,SORL1,PDPK1,ROCK2,PIK3R2,STAC3,EGFR,ANK3,WWTR1,TRIM8,YAP1,SEC16B,CRH
GO:BP	regulation of cellular component size	GO:0032535	3.22e-08	7.49272	387	1390	54	27543	MGLL,TTL,OLFM1,ATP2B2,CYFIP2,RAP1GAP2,FMN1,RTN4R,PPP1R9A,FSTL4,SPTBN2,DMTN,EFNA5,SHANK3,SPTB,SLC12A5,BAIAP2,TPM1,SWAP70,CIT,CXCL12,PCLO,DIP2B,CDK5R1,PRKCE,PLXNA4,SH3BP1,RB1CC1,CDKL5,DLG1,MTPN,SRF,ARHGAP35,NTRK3,PRR16,AKT3,PIK3R2,AQP4,CDHR2,TWF2,PTPRS,XK,WNT7B,BRK1,TNFRSF12A,ADD2,SEMA3G,SLIT2,AQP11,DEPTOR,ESAM,DSCAM,VAV3,BDNF
GO:BP	blood vessel morphogenesis	GO:0048514	3.23e-08	7.4905	643	1390	75	27543	FBXW7,PRKCB,WNT4,HEG1,FGF9,PLXND1,S1PR1,APLN,RORA,NRXN1,DAB2IP,BMPER,PTN,HEY1,PPP3R1,ZMIZ1,NRCAM,PTK2,MYO1E,IL12A,RAMP1,HBEGF,PTPRB,PRKCA,HS6ST1,CXCL12,NRXN3,RBPJ,NTRK2,EPAS1,MAPK14,PTGS2,PLCD3,ITGAV,SMOC2,ENG,ACVRL1,NOTCH4,SRF,VHL,LRG1,ISM1,SPRED1,PDPK1,ROCK2,AKT3,SPRY2,PIK3R2,QK,MED1,ITGB8,WNT7B,ADAMTS1,PRCP,SOX18,TNFRSF12A,ADM,SLIT2,YAP1,HIPK2,ABCC8,EPHB1,ROBO4,VAV3,RGCC,SMARCA4,HGF,ACKR3,COL1…
GO:BP	positive regulation of cell population proliferation	GO:0008284	3.56e-08	7.44807	1048	1390	105	27543	ZFP703,CD6,SLC39A10,PAK1,FGF9,ITPR1,CRIP2,PPP3CA,S1PR1,APLN,IL11RA1,LIFR,ERBB4,DAB2IP,AKT2,PTN,GPR37L1,MPL,TFRC,SSBP3,CLEC11A,ZMIZ1,PRKCZ,PTK2,FERMT2,FZD3,HDAC4,FGFR3,IL12A,HTRA1,HBEGF,PTPRZ1,PRKCA,PGR,SMPD3,CXCL12,AGAP2,PPARD,ARRB1,RBPJ,ITGAL,NTRK2,MEF2D,TSPYL5,MAPK14,PTGS2,SCX,TRPM4,EGR1,PIM1,MAS1,FOXP1,ITGAV,DLG1,LAMC2,ACVRL1,FZD9,GLI3,ASCL1,VHL,NTRK3,LRG1,TNS3,IGF1R,KITL,PDPK1,GPAM,PPARGC1A,A…
GO:BP	angiogenesis	GO:0001525	4.03e-08	7.39461	545	1390	67	27543	FBXW7,PRKCB,FGF9,PLXND1,S1PR1,APLN,RORA,NRXN1,DAB2IP,BMPER,PTN,HEY1,PPP3R1,NRCAM,PTK2,IL12A,RAMP1,HBEGF,PTPRB,PRKCA,HS6ST1,CXCL12,NRXN3,RBPJ,EPAS1,MAPK14,PTGS2,PLCD3,ITGAV,SMOC2,ENG,ACVRL1,NOTCH4,SRF,VHL,LRG1,ISM1,SPRED1,PDPK1,ROCK2,AKT3,SPRY2,PIK3R2,MED1,ITGB8,WNT7B,ADAMTS1,PRCP,SOX18,TNFRSF12A,ADM,SLIT2,HIPK2,ABCC8,EPHB1,ROBO4,VAV3,RGCC,HGF,ACKR3,COL15A1,SYK,NOTCH1,HPSE,MYH9,EDNRA,ADAM8
GO:BP	locomotory behavior	GO:0007626	4.09e-08	7.38797	247	1390	41	27543	GIT1,SNAP25,GRIN2A,ATP2B2,DLG4,ZDHHC8,MYO5A,GLRB,PREX2,SHANK3,LRRK2,GRIN1,CACNB4,APBA2,NEGR1,LGI4,KCNJ10,DAB1,CXCL12,RELN,USP2,PRKCE,PPP1R1B,CACNA1A,EGR1,OXR1,B4GALT2,OPRD1,ATP1A2,CALB1,SHANK2,ADAM22,AGTPBP1,ALDH1A3,HIPK2,GAD1,DRD4,DSCAM,CRH,SEZ6L,NAV2
GO:BP	regulation of muscle system process	GO:0090257	4.09e-08	7.38797	247	1390	41	27543	SMAD3,TNNC1,CALM1,KCNA1,MYBPC3,ATP1A1,PPP3CA,ATP2B1,ADORA1,ADRA1B,RYR1,FBXO32,PTK2,DOCK4,ADRA2C,HDAC4,PDE5A,FOXO3,PIN1,ADRB1,ZDHHC21,ATP2A1,PPARG,PTGS2,TMEM38A,ARHGAP42,TRPM4,FOXP1,DLG1,MTPN,MYH7,SRF,ATP1A2,RYR2,PPARA,ADRA1A,ANK2,MEF2C,AKAP6,ABCC8,NOTCH1
GO:BP	actin filament bundle organization	GO:0061572	4.48e-08	7.34858	169	1390	33	27543	SMAD3,WNT4,PAK1,S1PR1,PHACTR1,PPP1R9A,SHANK1,SPIRE1,DMTN,SHANK3,ARHGEF10L,ACTN4,FAM107A,FERMT2,BAIAP2,TPM1,SWAP70,ARRB1,SRC,CORO2B,MYH10,ACTN1,SRF,FAM171A1,PDLIM1,MYO1B,ROCK2,PIK3R2,FSCN1,ESPNL,ADD2,RGCC,RHPN1
GO:BP	striated muscle tissue development	GO:0014706	4.73e-08	7.32489	269	1390	43	27543	ZFPM1,LY6E,SMAD3,TNNC1,SORBS2,HEG1,FGF9,MYBPC3,S1PR1,ERBB4,MYLK3,VGLL4,TPM1,PIN1,ADRB1,PLEC,RBPJ,MAPK14,MYH10,PIM1,KCNK2,FOXP1,MYOD1,ENG,RBP4,MYH7,SRF,RYR2,SOX6,PPARA,ADRA1A,MEF2C,MED1,AKAP6,MAPK11,YAP1,BMP2,BDNF,FHL2,NOTCH1,ALPK2,EDNRA,SGCZ
GO:BP	positive regulation of cell migration	GO:0030335	4.96e-08	7.30456	560	1390	68	27543	SMAD3,ZFP703,PAK1,FGF9,PPP3CA,S1PR1,ERBB4,DAB2IP,AKT2,MYO5A,IQSEC1,PTN,RAPGEF4,DMTN,FBXO31,ACTN4,FAM107A,ADAM9,CXCL14,PTK2,DOCK4,FERMT2,GRIN1,HDAC4,IL12A,HBEGF,PTPRZ1,TBC1D24,PRKCA,SWAP70,PGR,APC,CXCL12,RELN,SRC,PRKCE,PTGS2,EGR1,MGAT5,FOXP1,ITGAV,SMOC2,PODXL,LAMC2,SUN2,NUMB,NTRK3,IGF1R,KITL,ARHGEF2,PDPK1,ROCK2,AKT3,SPRY2,PTP4A1,EGFR,GCNT2,ADAMTS1,SEMA3G,JAM2,SOX9,BMP2,HGF,ACKR3,NOTCH1,HPSE,EDNRA,…
GO:BP	muscle organ development	GO:0007517	5.1e-08	7.29245	346	1390	50	27543	ZFPM1,LY6E,SMAD3,TNNC1,HEG1,MYBPC3,PPP3CA,S1PR1,RBFOX1,ZBTB18,CNTNAP1,FOXK1,ADARB1,RYR1,HOMER1,PLAGL1,FGFRL1,HDAC4,TPM1,PLEC,EGR2,ACTA1,RBPJ,USP2,MEF2D,MAPK14,SCX,EGR1,FOXP1,MYOD1,ENG,MYH7,HIVEP3,MBNL1,RYR2,TRIM72,STAC3,MEF2C,MED1,KLHL40,XK,S100B,NR1D2,ETV1,EPHB1,BMP2,BDNF,NEURL1A,NOTCH1,EDNRA
GO:BP	cellular divalent inorganic cation homeostasis	GO:0072503	5.27e-08	7.27812	324	1390	48	27543	KCTD17,PRKCB,CALM1,SLC39A10,SLC24A2,ATP2B2,TRPC6,WFS1,ITPR1,BOK,ATP2B1,ADORA1,SLC25A23,SLC30A4,MYO5A,JSRP1,MYH7B,CLSTN1,JPH3,RYR1,NPTN,GRIN1,ATP2A1,PYGM,PRKCE,RAP1GDS1,STIM2,TMEM38A,CACNA1A,HTT,ITGAV,SLC24A3,FZD9,DDIT3,SLC39A14,CALB1,RYR2,PDPK1,SLC8A2,HTR1B,ATF4,ANK2,AKAP6,ITPR2,XK,S100B,HERPUD1,EDNRA
GO:BP	response to transforming growth factor beta	GO:0071559	5.32e-08	7.27396	249	1390	41	27543	SMAD3,ZFP703,NLK,WNT4,LRRC32,VASN,ZMIZ1,ADAM9,PTK2,FERMT2,HTRA1,PIN1,SRC,NREP,RASL11B,GIPC1,ZBTB7A,ACVR1C,SCX,WNT10A,ENG,ACVRL1,PEG10,LRG1,IGF1R,SPRED1,SNW1,PDPK1,SOX5,PPARGC1A,SOX6,SPRY2,PPARA,MEF2C,ADAMTSL2,GCNT2,ITGB8,HIPK2,DUSP22,SOX9,BMP2
GO:BP	positive regulation of cation transmembrane transport	GO:1904064	5.82e-08	7.23472	180	1390	34	27543	PLCB1,KCNC1,CALM1,KCNA1,ARC,CACNB3,RGS7,RAMP3,SHANK3,TESC,GRIN1,CACNG2,CACNB4,ATP1B2,ADRB1,RELN,HCN1,ATP2A1,KCNJ11,STIM2,AKAP5,HTT,RYR2,LRRC38,PDPK1,CACNA2D1,STAC3,ANK2,AKAP6,ANK3,AMIGO1,DRD4,ABCC8,EDNRA
GO:BP	positive regulation of ion transmembrane transport	GO:0034767	6.49e-08	7.18754	200	1390	36	27543	PLCB1,KCNC1,CALM1,KCNA1,TRPC6,ARC,CACNB3,RGS7,MYO5A,RAMP3,SHANK3,TESC,GRIN1,CACNG2,CACNB4,ATP1B2,ADRB1,RELN,HCN1,ATP2A1,KCNJ11,STIM2,AKAP5,HTT,RYR2,LRRC38,PDPK1,CACNA2D1,STAC3,ANK2,AKAP6,ANK3,AMIGO1,DRD4,ABCC8,EDNRA
GO:BP	cardiac muscle tissue development	GO:0048738	6.9e-08	7.16131	251	1390	41	27543	ZFPM1,LY6E,TNNC1,SORBS2,HEG1,FGF9,MYBPC3,S1PR1,ERBB4,MYLK3,VGLL4,TPM1,PIN1,ADRB1,PLEC,RBPJ,MAPK14,MYH10,PIM1,KCNK2,FOXP1,MYOD1,ENG,RBP4,MYH7,SRF,RYR2,SOX6,PPARA,ADRA1A,MEF2C,MED1,AKAP6,MAPK11,YAP1,BMP2,FHL2,NOTCH1,ALPK2,EDNRA,SGCZ
GO:BP	dephosphorylation	GO:0016311	8.09e-08	7.09195	408	1390	55	27543	ARPP19,SMAD3,PTPN3,PDP1,CALM1,SLC39A10,PHOSPHO1,DUSP7,ATP1A1,PPP3CA,DUSP14,ADORA1,PPP2R2C,INPPL1,CRY2,DUSP1,PPM1K,PPP3R1,PTPRD,DUSP18,LRRK2,PPP1R9B,PTPRT,PTPRB,PTPRZ1,SWAP70,PIN1,PTPN4,INPP4A,SRC,NT5DC3,PPP1R1B,PPM1L,DUSP3,MAGI2,DUSP6,MGAT5,HTT,PTPRJ,PFKFB3,INPP5D,TNS3,ROCK2,MTMR12,PTP4A1,PPP6R1,MEF2C,PTPRS,PTPRF,MPRIP,PPM1H,DUSP22,CDC25B,BMP2,NUAK1
GO:BP	heart morphogenesis	GO:0003007	8.35e-08	7.07808	263	1390	42	27543	ZFPM1,LY6E,SMAD3,TNNC1,OLFM1,HEG1,FGF9,MYBPC3,PLXND1,S1PR1,RYR1,EXT1,ZMIZ1,FGFRL1,MIB1,MICAL2,TPM1,FLRT2,RBPJ,DHRS3,PIM1,ENG,RBP4,ACVRL1,MYH7,SRF,NCOR2,RYR2,AXIN2,DVL3,MEF2C,MED1,ADAMTS1,SLIT2,YAP1,SOX9,BMP2,SMARCA4,FHL2,NOTCH1,ALPK2,EDNRA
GO:BP	negative regulation of phosphate metabolic process	GO:0045936	8.47e-08	7.07215	444	1390	58	27543	ARPP19,GIT1,GFRA2,HEG1,DUSP7,DAB2IP,INPPL1,CRY2,DUSP1,RASSF2,DMTN,CADM4,ADARB1,LRRK2,PPP1R9B,SIRPA,PRKAR1B,PRKCZ,PIP4K2C,PTPRT,SRCIN1,HDAC4,PTPRB,SWAP70,APC,PLEC,ARRB1,HIPK3,TRIB1,PKIG,PPP1R1B,ZFYVE28,DUSP3,DUSP6,MGAT5,MAS1,MLLT1,ENG,PTPRJ,MAPK8IP1,NTRK3,SPRED1,SOCS3,SORL1,PDPK1,PPARGC1A,ROCK2,SPRY2,PPARA,SLC4A1,MPRIP,WWTR1,SLIT2,DUSP22,KIRREL2,DEPTOR,BMP2,HGF
GO:BP	negative regulation of phosphorus metabolic process	GO:0010563	8.47e-08	7.07215	444	1390	58	27543	ARPP19,GIT1,GFRA2,HEG1,DUSP7,DAB2IP,INPPL1,CRY2,DUSP1,RASSF2,DMTN,CADM4,ADARB1,LRRK2,PPP1R9B,SIRPA,PRKAR1B,PRKCZ,PIP4K2C,PTPRT,SRCIN1,HDAC4,PTPRB,SWAP70,APC,PLEC,ARRB1,HIPK3,TRIB1,PKIG,PPP1R1B,ZFYVE28,DUSP3,DUSP6,MGAT5,MAS1,MLLT1,ENG,PTPRJ,MAPK8IP1,NTRK3,SPRED1,SOCS3,SORL1,PDPK1,PPARGC1A,ROCK2,SPRY2,PPARA,SLC4A1,MPRIP,WWTR1,SLIT2,DUSP22,KIRREL2,DEPTOR,BMP2,HGF
GO:BP	fat cell differentiation	GO:0045444	8.91e-08	7.05001	253	1390	41	27543	PLCB1,ZFPM1,CCDC3,SMAD3,DIO2,JDP2,SENP2,MEDAG,RORA,SORT1,DKKL1,CDS1,ZBTB16,FERMT2,METRNL,NR1D1,ADRB1,EGR2,FRZB,PPARD,LAMB3,PPARG,ZBTB7A,MAPK14,PTGS2,CEBPA,ZBTB7B,TBL1XR1,TRPM4,PIM1,NCOR2,DDIT3,LRG1,OSBPL8,LRRC8C,MED1,WWTR1,YAP1,GRK5,BMP2,INSIG1
GO:BP	peptidyl-serine phosphorylation	GO:0018105	1.02e-07	6.99304	330	1390	48	27543	NLK,PRKCB,PAK1,MAST3,LMTK2,NRXN1,AKT2,TFRC,RASSF2,DMTN,RAMP3,LRRK2,BRSK2,PRKCZ,CSNK1G2,MAPK9,CAMK1G,MAPK12,ARRB1,SRC,CDK5R1,HIPK3,PRKCE,TTBK1,NTRK2,MARK2,RPS6KA2,MAPK14,PTGS2,BRSK1,OPRD1,DCLK1,FNIP1,RPS6KA3,MKNK2,NTRK3,TNKS1BP1,MAP3K10,CD44,PDPK1,ROCK2,AKT3,SPRY2,EGFR,HIPK2,BDNF,HGF,SYK
GO:BP	cellular calcium ion homeostasis	GO:0006874	1.03e-07	6.98546	297	1390	45	27543	KCTD17,PRKCB,CALM1,SLC24A2,ATP2B2,TRPC6,WFS1,ITPR1,BOK,ATP2B1,ADORA1,SLC25A23,MYO5A,JSRP1,MYH7B,CLSTN1,JPH3,RYR1,NPTN,GRIN1,ATP2A1,PYGM,PRKCE,RAP1GDS1,STIM2,TMEM38A,CACNA1A,HTT,ITGAV,SLC24A3,FZD9,DDIT3,CALB1,RYR2,PDPK1,SLC8A2,HTR1B,ATF4,ANK2,AKAP6,ITPR2,XK,S100B,HERPUD1,EDNRA
GO:BP	regulation of biosynthetic process	GO:0009889	1.2e-07	6.92052	4220	1390	302	27543	SCRT1,ARPP19,PLCB1,NFIC,ZFPM1,CCDC3,SMAD3,CUX1,KCTD1,ZFP703,ATF6,NLK,PRKCB,WNT4,RASD1,BAP1,JDP2,CAMTA2,FGF9,CAMK4,WFS1,ADCY1,CUX2,ATP1A1,ZMYND8,TRIM37,PPP3CA,SENP2,S1PR1,APLN,ZMIZ2,RORA,ABHD6,PKNOX2,CDK16,MAF,DKKL1,ERBB4,SMARCD1,DAB2IP,KCNIP3,AKT2,ZBTB18,LPGAT1,CRY2,NR3C1,DUSP1,TFRC,SSBP3,ASH1L,HEY1,PPP3R1,HSPA1B,CXXC5,FOXK1,VGLL4,SLC25A37,POU6F1,HIVEP2,ATXN7L3,SBNO1,ZBTB16,BHLHE40,TESC,ACTN4,ZMI…
GO:BP	negative regulation of macromolecule biosynthetic process	GO:0010558	1.21e-07	6.91726	1613	1390	142	27543	SCRT1,PLCB1,NFIC,ZFPM1,SMAD3,KCTD1,ZFP703,WNT4,RASD1,BAP1,JDP2,FGF9,WFS1,CUX2,ZMYND8,TRIM37,MAF,DAB2IP,KCNIP3,ZBTB18,CRY2,DUSP1,HEY1,HSPA1B,CXXC5,FOXK1,VGLL4,POU6F1,ZBTB16,BHLHE40,FOXK2,TLE6,HHATL,KLF16,WWC1,HES3,HR,APBB1,CIPC,SCRT2,CPEB2,HDAC4,HBEGF,SCAI,ETV6,FOXO3,NR1D1,CBX6,ESRRB,TLE1,SMPD3,ZFP148,PPARD,SRC,PPARG,CDK5R1,TBR1,HIPK3,RBPJ,USP2,PKIG,CPEB4,NFE2L1,HCFC2,NR2F6,ZBTB34,BACE2,ZBTB7A,EPA…
GO:BP	regulation of cellular biosynthetic process	GO:0031326	1.26e-07	6.90017	4136	1390	297	27543	SCRT1,ARPP19,PLCB1,NFIC,ZFPM1,SMAD3,CUX1,KCTD1,ZFP703,ATF6,NLK,PRKCB,WNT4,RASD1,BAP1,JDP2,CAMTA2,FGF9,CAMK4,WFS1,ADCY1,CUX2,ATP1A1,ZMYND8,TRIM37,PPP3CA,SENP2,S1PR1,APLN,ZMIZ2,RORA,PKNOX2,CDK16,MAF,DKKL1,ERBB4,SMARCD1,DAB2IP,KCNIP3,AKT2,ZBTB18,LPGAT1,CRY2,NR3C1,DUSP1,TFRC,SSBP3,ASH1L,HEY1,PPP3R1,HSPA1B,CXXC5,FOXK1,VGLL4,SLC25A37,POU6F1,HIVEP2,ATXN7L3,SBNO1,ZBTB16,BHLHE40,TESC,ACTN4,ZMIZ1,ATMIN,PAR…
GO:BP	muscle contraction	GO:0006936	1.3e-07	6.88636	310	1390	46	27543	TNNC1,CALM1,KCNA1,MYL4,MYBPC3,ATP1A1,ATP2B1,ADORA1,JSRP1,ADRA1B,RYR1,HOMER1,SCN1B,MYH2,APBB1,DOCK4,ADRA2C,HDAC4,PDE5A,TPM1,ADRB1,ZDHHC21,SMPD3,ATP2A1,RAP1GDS1,PTGS2,TMEM38A,ARHGAP42,TRPM4,KCNN2,DLG1,MYH7,SRF,ATP1A2,RYR2,MYH4,CACNA2D1,ROCK2,STAC3,ADRA1A,ANK2,EDNRB,AKAP6,APBB2,MYH1,EDNRA
GO:BP	regulation of postsynaptic membrane neurotransmitter receptor levels	GO:0099072	1.39e-07	6.85556	89	1390	23	27543	GIT1,SNAP25,DLG4,PACSIN1,ARC,PIP5K1C,IQSEC2,STX1B,IQSEC1,RAPGEF4,PPP3R1,CLSTN1,PRKCZ,CACNG2,CPLX1,FRRS1L,MAGI2,AKAP5,DLG1,NUMB,ADAM22,NPTX1,DRD4
GO:BP	regulation of neuronal synaptic plasticity	GO:0048168	1.43e-07	6.84599	67	1390	20	27543	GRIN2A,DLG4,ARC,JPH3,SHANK3,NPTN,GRIN1,PPFIA3,SYNGAP1,KCNJ10,EGR2,ZDHHC2,UNC13A,EGR1,KCNN2,UNC13B,SLC8A2,S100B,BDNF,NEURL1A
GO:BP	cell-substrate junction organization	GO:0150115	1.45e-07	6.83833	97	1390	24	27543	SMAD3,WNT4,GPM6B,FMN1,IQSEC1,DMTN,EFNA5,FAM107A,PTK2,FERMT2,PLEC,SRC,DUSP3,CORO2B,ITGAV,ACTN1,PTPRJ,ACVRL1,PDPK1,RCC2,COL17A1,DUSP22,RHPN1,TNS1
GO:BP	calcium ion homeostasis	GO:0055074	1.6e-07	6.79686	323	1390	47	27543	KCTD17,PRKCB,CALM1,SLC24A2,ATP2B2,TRPC6,WFS1,ITPR1,BOK,ATP2B1,ADORA1,SLC25A23,MYO5A,JSRP1,MYH7B,CLSTN1,JPH3,RYR1,NPTN,GRIN1,ATP2A1,PYGM,PRKCE,RAP1GDS1,STIM2,TMEM38A,CACNA1A,HTT,ITGAV,SLC24A3,FZD9,DDIT3,CALB1,RYR2,PDPK1,SLC8A2,HTR1B,ATF4,ANK2,AKAP6,ITPR2,XK,S100B,ADM,FAM20A,HERPUD1,EDNRA
GO:BP	cellular component maintenance	GO:0043954	1.63e-07	6.78676	82	1390	22	27543	DGKZ,GIT1,WHRN,DLG4,ZMYND8,BSN,DLGAP1,CNTNAP1,SHANK1,SHANK3,HOMER1,ERC2,FERMT2,GRIN1,SYNGAP1,PCLO,MAGI2,MPP2,DLG1,IGF1R,SHANK2,TANC1
GO:BP	protein localization to postsynaptic membrane	GO:1903539	1.65e-07	6.78313	54	1390	18	27543	GIT1,SNAP25,GRIN2A,DLG4,IQSEC2,STX1B,RAPGEF4,CLSTN1,PRKCZ,GRIN1,CACNG2,CPLX1,ZDHHC2,MAGI2,DLG1,ADAM22,GRIN2C,NPTX1
GO:BP	positive regulation of MAPK cascade	GO:0043410	1.7e-07	6.76891	513	1390	63	27543	PLCB1,FBXW7,PAK1,FGF9,IGFBP4,ADORA1,NRXN1,ALOX12B,ERBB4,DAB2IP,BMPER,GPR37L1,RASSF2,ADRA1B,RASGRP1,RAMP3,NPTN,LRRK2,ADAM9,WWC1,PRKCZ,FERMT2,ADRA2C,FGFR3,PDE5A,CXCL12,ARRB1,SRC,PRKCE,IGFBP6,NTRK2,MADD,TNFRSF19,RB1CC1,EPHA8,KISS1,MAPK8IP1,NTRK3,GRM4,MAP3K10,KITL,CD44,PLA2G5,SPRY2,DVL3,ADRA1A,AVPI1,MEF2C,EGFR,GCNT2,WNT7B,FZD10,THPO,HIPK2,DUSP22,DRD4,BMP2,HGF,ACKR3,SYK,NOTCH1,EDNRA,ADAM8
GO:BP	negative regulation of cellular component movement	GO:0051271	1.82e-07	6.7391	302	1390	45	27543	PLCB1,NBL1,WNT4,ZMYND8,ADORA1,ABHD6,DAB2IP,PTN,DUSP1,ADARB1,ACTN4,PTPRT,PTK2,NAV3,ATP1B2,SCAI,TPM1,FOXO3,PIN1,CXCL12,PPARD,TRIB1,ACVR1C,ABHD2,DUSP3,MAGI2,ACTN1,ENG,PTPRJ,ACVRL1,SRF,NRG3,SPRED1,OSBPL8,PPARGC1A,PIK3R2,MEF2C,DNAJA4,SLIT2,DUSP22,DRD4,ABCC8,ROBO4,RGCC,NOTCH1
GO:BP	embryo development	GO:0009790	1.83e-07	6.73711	1236	1390	116	27543	ADCY9,PLCB1,WHRN,ZFPM1,LY6E,SMAD3,ETL4,ETNK2,WNT4,HEG1,WNT9A,ATP2B2,BAP1,FGF9,CHRDL1,SENP2,APLN,MAN2A1,SLC35E2,ERBB4,ZBTB18,DUSP1,LUZP1,SSBP3,DLX1AS,SPECC1,E030003E18RIK,SHANK3,EXT1,ZBTB16,ZMIZ1,CDK2AP1,TLE6,HES3,LMO4,MYO1E,FZD3,SEBOX,HBEGF,APBA2,MIB1,MICAL2,ANKRD11,TPM1,TCOF1,HIRA,HS6ST1,ESRRB,FRZB,SHROOM3,LAMB3,CDK5R1,RBPJ,PLXNA4,LRP4,ZBTB17,ACVR1C,EPAS1,CEBPA,TBL1XR1,SCX,PLCD3,MYH10,LAMA3,FOXP…
GO:BP	morphogenesis of an epithelium	GO:0002009	2.01e-07	6.69724	540	1390	65	27543	SMAD3,WNT4,PAK1,PLXND1,FMN1,ASTN2,ERBB4,LUZP1,PPP3R1,E030003E18RIK,SHANK3,EXT1,BRSK2,LMO4,FERMT2,FZD3,HBEGF,MIB1,MICAL2,PLEKHA4,PGR,CXCL12,FRZB,SHROOM3,SRC,RBPJ,SH3BP1,BRSK1,WNT10A,LAMA3,FOXP1,DLG1,NKD1,PODXL,ENG,ACVRL1,PTK7,NOTCH4,SRF,GLI3,ARHGAP35,RYR2,LRG1,LGR4,SOCS3,CD44,CSMD1,SPRY2,RSPO2,DVL3,CTHRC1,MEF2C,EGFR,MED1,WNT7B,ADM,SLIT2,ALDH1A3,YAP1,SOX9,BMP2,SMARCA4,HGF,NOTCH1,EDNRA
GO:BP	cell-substrate junction assembly	GO:0007044	2.27e-07	6.64304	91	1390	23	27543	SMAD3,WNT4,GPM6B,FMN1,DMTN,EFNA5,FAM107A,PTK2,FERMT2,PLEC,SRC,DUSP3,CORO2B,ITGAV,ACTN1,PTPRJ,ACVRL1,PDPK1,RCC2,COL17A1,DUSP22,RHPN1,TNS1
GO:BP	regulation of cellular response to growth factor stimulus	GO:0090287	2.28e-07	6.64141	293	1390	44	27543	SMAD3,ZFP703,NBL1,PRKCB,WNT4,FGF9,CYFIP2,CHRDL1,APLN,NRXN1,DAB2IP,BMPER,VASN,CADM4,NPTN,FGFRL1,IL12A,HTRA1,PIN1,RNF165,RBPJ,NREP,RASL11B,GIPC1,ZBTB7A,SMOC2,ENG,WASF1,ACVRL1,PEG10,LRG1,SPRED1,SORL1,SNW1,PDPK1,SPRY2,PPARA,ADAMTSL2,FBXL15,PTPRF,SLIT2,HIPK2,BMP2,NOTCH1
GO:BP	positive regulation of GTPase activity	GO:0043547	2.3e-07	6.63876	250	1390	40	27543	SIPA1L1,ASAP1,WNT4,RAP1GAP2,S1PR1,RTN4R,RGS7,TBC1D30,ARAP2,RASGEF1B,RAPGEFL1,AKT2,IQSEC1,RAPGEF4,ADAP1,TBC1D22A,RASGRP1,NET1,RASGEF1A,FERMT2,GARNL3,PIN1,ADRB1,ASAP2,RASGEF1C,RAP1GDS1,SH3BP1,ARHGAP42,PREX1,CDKL5,ARHGAP35,NTRK3,SIPA1L2,PLXNB1,DVL3,RCC2,FZD10,ARHGEF19,ARHGAP25,TBC1D2
GO:BP	protein localization to postsynapse	GO:0062237	2.33e-07	6.63189	55	1390	18	27543	GIT1,SNAP25,GRIN2A,DLG4,IQSEC2,STX1B,RAPGEF4,CLSTN1,PRKCZ,GRIN1,CACNG2,CPLX1,ZDHHC2,MAGI2,DLG1,ADAM22,GRIN2C,NPTX1
GO:BP	positive regulation of locomotion	GO:0040017	2.42e-07	6.61551	606	1390	70	27543	SMAD3,ZFP703,PAK1,FGF9,PPP3CA,S1PR1,ERBB4,DAB2IP,AKT2,MYO5A,IQSEC1,PTN,RAPGEF4,DMTN,FBXO31,ACTN4,FAM107A,ADAM9,CXCL14,PTK2,DOCK4,FERMT2,GRIN1,HDAC4,IL12A,HBEGF,PTPRZ1,TBC1D24,PRKCA,SWAP70,PGR,APC,CXCL12,RELN,SRC,PRKCE,PTGS2,EGR1,MGAT5,FOXP1,ITGAV,SMOC2,PODXL,LAMC2,SUN2,NUMB,NTRK3,IGF1R,KITL,ARHGEF2,PDPK1,ROCK2,AKT3,SPRY2,PTP4A1,EGFR,GCNT2,ADAMTS1,SEMA3G,SLIT2,JAM2,SOX9,DSCAM,BMP2,HGF,ACKR3,NOTCH1…
GO:BP	transmembrane receptor protein serine/threonine kinase signaling pathway	GO:0007178	2.58e-07	6.58758	385	1390	52	27543	SMAD3,ZFP703,NLK,NBL1,FGF9,CHRDL1,LRRC32,BMPER,VASN,EXT1,ZMIZ1,ADAM9,PTK2,FERMT2,HTRA1,BTBD11,PIN1,SMPD3,SRC,RNF165,RBPJ,NREP,RASL11B,GIPC1,ZBTB7A,ACVR1C,MAPK14,PPM1L,SCX,MAGI2,EGR1,ENG,ACVRL1,PEG10,LRG1,SPRED1,SORL1,SNW1,PDPK1,SPRY2,PPARA,ADAMTSL2,FBXL15,GCNT2,DACT2,ITGB8,WWTR1,HIPK2,DUSP22,BMP2,NOTCH1,INHBA
GO:BP	regulation of response to stress	GO:0080134	2.68e-07	6.57214	1317	1390	121	27543	MGLL,PLCB1,FBXW7,GIT1,SMAD3,ZNFX1,ATF6,WNT4,SEC14L1,BAP1,WFS1,PPP3CA,BOK,ADORA1,SLC25A23,RTN4R,TYRO3,RORA,DAB2IP,PTN,SPIRE1,GPR37L1,DUSP1,DAGLB,CDK19,ASH1L,RASSF2,RTN4RL1,UBQLN4,DMTN,CADM4,RASGRP1,SHANK3,LRRK2,SIRPA,PRKAR1B,APBB1,PTK2,FERMT2,IL12A,FAM168A,HTRA1,HBEGF,MAPK9,PDE5A,ZFP365,METRNL,TBC1D24,CNR1,FOXO3,NR1D1,IER5,CXCL12,PPARD,PPARG,HIPK3,PRKCE,NFE2L1,TTBK1,IGFBP6,TNFRSF19,RB1CC1,RNF169,P…
GO:BP	protein dephosphorylation	GO:0006470	2.8e-07	6.55224	273	1390	42	27543	ARPP19,PTPN3,PDP1,CALM1,SLC39A10,DUSP7,PPP3CA,DUSP14,ADORA1,PPP2R2C,CRY2,DUSP1,PPM1K,PPP3R1,PTPRD,DUSP18,LRRK2,PPP1R9B,PTPRT,PTPRB,PTPRZ1,SWAP70,PIN1,PTPN4,PPP1R1B,PPM1L,DUSP3,MAGI2,DUSP6,MGAT5,HTT,PTPRJ,ROCK2,PTP4A1,PPP6R1,PTPRS,PTPRF,MPRIP,PPM1H,DUSP22,CDC25B,NUAK1
GO:BP	maintenance of postsynaptic specialization structure	GO:0098880	2.84e-07	6.54657	18	1390	11	27543	DGKZ,GIT1,DLG4,DLGAP1,SHANK1,SHANK3,SYNGAP1,MAGI2,MPP2,DLG1,SHANK2
GO:BP	regulation of cell morphogenesis	GO:0022604	3.02e-07	6.51973	329	1390	47	27543	CPNE9,SYT2,DLG4,ARC,CUX2,PLXND1,RIMS1,PTN,MPL,PTPRD,DMTN,EFNA5,SYT1,FBXO31,ACTN4,STRIP2,PLEKHO1,PTK2,FERMT2,MAPK9,TBC1D24,BAIAP2,TPM1,RELN,SRC,PLXNA4,UNC13A,NTNG2,PREX1,FMNL1,MYH10,AKAP5,CDKL5,DLG1,NUMB,FAM171A1,ARHGAP35,STAU2,CD44,PLXNB1,CAMSAP1,TRIOBP,PTPRF,RCC2,S100B,HPSE,MYH9
GO:BP	associative learning	GO:0008306	3.1e-07	6.50926	117	1390	26	27543	SNAP25,GRIN2A,SLC6A1,SHANK1,MAP1A,SPECC1,SHANK3,NPTN,GRIN1,SYNGAP1,PDE8B,RELN,TBR1,PPP1R1B,BRSK1,B4GALT2,SRF,ATP1A2,CSMD1,SHANK2,TANC1,ASIC1,DRD4,ABCC8,BDNF,CRH
GO:BP	regulation of synapse assembly	GO:0051963	3.1e-07	6.50926	117	1390	26	27543	SIPA1L1,CUX2,LRTM2,SYNDIG1,NRXN1,PPP1R9A,FARP1,PTPRD,CLSTN1,EFNA5,PTK2,GRIN1,NEGR1,FLRT2,NTRK2,NTNG2,SLITRK1,NTRK3,STAU2,IL1RAPL1,MEF2C,PTPRS,NPTX1,AMIGO1,EPHB1,BDNF
GO:BP	positive regulation of cellular component biogenesis	GO:0044089	3.25e-07	6.48844	521	1390	63	27543	GIT1,ASAP1,SMAD3,KCTD17,WNT4,PAK1,CUX2,ZMYND8,LRTM2,FMN1,SYNDIG1,NRXN1,DAB2IP,TFRC,HSPA1B,PTPRD,CLSTN1,EFNA5,ARHGEF10L,ATMIN,PIP4K2C,FERMT2,HDAC4,NAV3,MAPK9,BAIAP2,TPM1,SWAP70,APC,FLRT2,SMPD3,SRC,EPS8L2,PRKCE,PSRC1,TTBK1,NTRK2,HTT,DLG1,PTPRJ,FNIP1,SRF,SLITRK1,UNC13B,ARHGAP35,NTRK3,STAU2,ROCK2,AUTS2,HOPX,WIPI1,TWF2,FSCN1,BRK1,AMIGO1,SOX9,EPHB1,DYNC1H1,BDNF,RGCC,NEURL1A,CDC34,SYK
GO:BP	regulation of neurotransmitter receptor activity	GO:0099601	3.44e-07	6.46293	70	1390	20	27543	LYNX1,RPH3A,GRIN2A,DLG4,ARC,DLGAP3,DLGAP1,NRXN1,NETO2,SHANK1,SHANK3,HOMER1,CACNG2,RELN,SRC,PPARGC1A,DLGAP4,MEF2C,NPTX1,CRH
GO:BP	hindbrain development	GO:0030902	3.53e-07	6.45184	182	1390	33	27543	WHRN,KCNC1,ATP2B2,RORA,NRXN1,CDK5R2,ZBTB18,SPTBN2,GPR37L1,HES3,CTNNA2,GRIN1,ATP1B2,ZFP365,CKB,DAB1,EGR2,CDK5R1,TBR1,CACNA1A,MYH10,MTPN,B4GALT2,HERC1,ASCL1,NFIX,IGF1R,PTPRS,AGTPBP1,EPHB1,SMARCA4,SEZ6L,NAV2
GO:BP	regulation of cellular localization	GO:0060341	4.04e-07	6.39324	799	1390	84	27543	TTL,FBXW7,TNNC1,SORBS2,DLG4,GPM6B,ZMYND8,ASTN2,IQSEC2,CACNB3,NRXN1,DPP10,CDK16,ERBB4,AKT2,MYO5A,PTN,RAPGEF4,MAP1A,TFRC,DMTN,EFNA5,ABHD17A,RAMP3,SHANK3,LRRK2,PPP1R9B,BRSK2,PRKCZ,FERMT2,GRIN1,STXBP1,CACNG2,CACNB4,NR1D1,PIN1,APC,SMPD3,PDE8B,ATP2A1,PPARD,ARRB1,SRC,CDK5R1,KCNJ11,PKIG,PRKCE,LRP4,IL4RA,ZDHHC2,MTCL1,MAPK14,PTGS2,MAGI2,LRP1,NEFH,TRPM4,AKAP5,DLG1,NUMB,DCLK1,FZD9,ACSL3,LYPD1,GLI3,DDI2,PCSK9…
GO:BP	positive regulation of cell motility	GO:2000147	4.28e-07	6.36904	588	1390	68	27543	SMAD3,ZFP703,PAK1,FGF9,PPP3CA,S1PR1,ERBB4,DAB2IP,AKT2,MYO5A,IQSEC1,PTN,RAPGEF4,DMTN,FBXO31,ACTN4,FAM107A,ADAM9,CXCL14,PTK2,DOCK4,FERMT2,GRIN1,HDAC4,IL12A,HBEGF,PTPRZ1,TBC1D24,PRKCA,SWAP70,PGR,APC,CXCL12,RELN,SRC,PRKCE,PTGS2,EGR1,MGAT5,FOXP1,ITGAV,SMOC2,PODXL,LAMC2,SUN2,NUMB,NTRK3,IGF1R,KITL,ARHGEF2,PDPK1,ROCK2,AKT3,SPRY2,PTP4A1,EGFR,GCNT2,ADAMTS1,SEMA3G,JAM2,SOX9,BMP2,HGF,ACKR3,NOTCH1,HPSE,EDNRA,…
GO:BP	sensory organ development	GO:0007423	4.34e-07	6.36235	627	1390	71	27543	WHRN,SMAD3,ATF6,ATP2B2,FGF9,CHRDL1,ATP2B1,MAN2A1,MAF,FJX1,BMPER,PTN,GABRB2,E030003E18RIK,MEGF11,MERTK,CXCL14,H2-T23,FZD3,DIO3,ESRRB,TUB,HCN1,FRZB,OLFM3,RBPJ,FAT3,NTRK2,CEBPA,CLCN2,MYH10,WNT10A,KCNK2,DLG1,RBP4,ACVRL1,SDK1,PTK7,SRF,GLI3,ASCL1,CALB1,ARHGAP35,VHL,NTRK3,STAU2,SPRED1,SPRY2,SDK2,ATF4,DVL3,CTHRC1,EGFR,TRIOBP,MED1,ATP8B1,KCNK3,NES,AGTPBP1,ALDH1A3,HIPK2,SOX9,EPHB1,DSCAM,BMP2,BDNF,SMARCA4,I…
GO:BP	regulation of transcription by RNA polymerase II	GO:0006357	4.5e-07	6.34633	2494	1390	196	27543	SCRT1,NFIC,ZFPM1,SMAD3,CUX1,ATF6,PRKCB,JDP2,CAMTA2,FGF9,WFS1,CUX2,TRIM37,PPP3CA,SENP2,S1PR1,ZMIZ2,RORA,PKNOX2,MAF,SMARCD1,DAB2IP,KCNIP3,AKT2,ZBTB18,CRY2,SSBP3,ASH1L,HEY1,PPP3R1,HSPA1B,CXXC5,FOXK1,POU6F1,HIVEP2,ATXN7L3,ZBTB16,BHLHE40,ZMIZ1,ATMIN,FOXK2,TLE6,KLF16,WWC1,PLAGL1,HES3,LMO4,HR,APBB1,SSBP4,GRIN1,SCRT2,HDAC4,POU2F2,ESRRG,MICAL2,ZFP91,ATAD2,ETV6,FOXO3,PGR,NR1D1,PIN1,IER5,CBX6,ESRRB,EGR2,TLE…
GO:BP	regulation of regulated secretory pathway	GO:1903305	4.58e-07	6.33923	174	1390	32	27543	NRN1,GIT1,PRKCB,CALM1,RIMS3,CACNA1I,ADCY1,CDK5R2,SYT1,RIMS4,LRRK2,SYT12,STXBP1,CACNB4,APBA2,RAB15,CNR1,NRXN3,STXBP5L,PRKCE,GIPC1,SYT13,IL4RA,CACNA1A,PDPK1,HTR1B,SLC4A8,DGKI,ADRA1A,DRD4,SYK,NOTCH1
GO:BP	heart process	GO:0003015	4.59e-07	6.33803	245	1390	39	27543	NOS1AP,TNNC1,CALM1,MYL4,MYBPC3,ATP1A1,APLN,ADORA1,ADRA1B,RAMP3,SCN1B,EXT1,HDAC4,HBEGF,PDE5A,TPM1,ADRB1,ATP2A1,SRC,RPS6KA2,EPAS1,TMEM38A,TRPM4,KCNN2,DLG1,MYH7,ATP1A2,RYR2,CACNA2D1,ADRA1A,HOPX,ANK2,EDNRB,AKAP6,WWTR1,ADM,YAP1,EDNRA,SGCZ
GO:BP	second-messenger-mediated signaling	GO:0019932	4.88e-07	6.3113	311	1390	45	27543	CAMKK2,GRIN2A,CALM1,RASD1,ADCY1,ITPR1,PPP3CA,PPP1R9A,OLFR78,MYH7B,PPP3R1,DMTN,LRRK2,PPP1R9B,CAP2,GRIN1,HDAC4,PDE5A,HOMER2,ITGAL,NTRK2,TMEM38A,TRPM4,AKAP5,HTT,ACKR2,RYR2,PDPK1,SLC8A2,GUCY1A2,GRIN2C,ANK2,EGFR,SLA2,EDNRB,AKAP6,ITPR2,ADM,SOX9,DRD4,FHL2,ACKR3,CDC34,SYK,CRH
GO:BP	regulation of calcium ion transport	GO:0051924	5.01e-07	6.30026	278	1390	42	27543	NOS1AP,CALM1,ATP2B2,TRPC6,WFS1,ITPR1,ATP2B1,CACNB3,MYO5A,PACSIN3,JSRP1,RAMP3,JPH3,HOMER1,JPH4,GRIN1,CACNB4,HOMER2,ADRB1,CXCL12,ATP2A1,USP2,PRKCE,STIM2,AHNAK,PTGS2,TMEM38A,CACNA1A,AKAP5,HTT,OPRD1,ATP1A2,RYR2,PDPK1,CACNA2D1,STAC3,CACNB1,ANK2,AKAP6,DRD4,EDNRA,CRH
GO:BP	negative regulation of cell migration	GO:0030336	5.01e-07	6.30026	278	1390	42	27543	PLCB1,NBL1,WNT4,ZMYND8,ADORA1,ABHD6,DAB2IP,PTN,DUSP1,ADARB1,PTPRT,PTK2,NAV3,ATP1B2,SCAI,TPM1,FOXO3,CXCL12,PPARD,TRIB1,ACVR1C,ABHD2,DUSP3,MAGI2,ENG,PTPRJ,ACVRL1,SRF,NRG3,SPRED1,OSBPL8,PPARGC1A,PIK3R2,MEF2C,DNAJA4,SLIT2,DUSP22,DRD4,ABCC8,ROBO4,RGCC,NOTCH1
GO:BP	negative regulation of cell population proliferation	GO:0008285	5.39e-07	6.26804	736	1390	79	27543	SMAD3,WNT9A,BAP1,PAK1,APLN,ADORA1,LRRC32,ERBB4,DAB2IP,INPPL1,PTN,DUSP1,HSPA1B,ADARB1,VGLL4,ZBTB16,TESC,FGFRL1,HDAC4,IL12A,CACNB4,PTPRZ1,PDE5A,TPM1,APC,NDRG2,CXCL12,FRZB,PPARD,PPARG,RBPJ,TRIB1,ZBTB17,ACVR1C,RPS6KA2,RB1CC1,PTGS2,CEBPA,ZBTB7B,MAGI2,KISS1,KCNK2,DLG1,SMARCA2,MYOD1,ENG,PTPRJ,RBP4,ACVRL1,FNIP1,SRF,GLI3,KLF9,NACC2,INPP5D,PPARGC1A,PLXNB1,SPRY2,AXIN2,MEF2C,MED1,PTPRF,SLFN2,MAPK11,ADM,AGTPB…
GO:BP	positive regulation of RNA metabolic process	GO:0051254	6.05e-07	6.21806	1836	1390	154	27543	PLCB1,NFIC,ZFPM1,SMAD3,ATF6,PRKCB,WNT4,CAMTA2,FGF9,CAMK4,TRIM37,PPP3CA,SENP2,S1PR1,APLN,ZMIZ2,RORA,MAF,ERBB4,DAB2IP,AKT2,ZBTB18,SSBP3,ASH1L,PPP3R1,FOXK1,ADARB1,HIVEP2,ATXN7L3,ZBTB16,TESC,ACTN4,ZMIZ1,ATMIN,FOXK2,WWC1,PLAGL1,HES3,LMO4,APBB1,SSBP4,GRIN1,HDAC4,POU2F2,ESRRG,MAPK9,MICAL2,ZFP91,ATAD2,ETV6,FOXO3,PGR,NR1D1,PIN1,IER5,TACC1,ESRRB,EGR2,ZFP148,AGAP2,PPARD,ARRB1,SRC,PPARG,TBR1,CITED4,RBPJ,CRTC…
GO:BP	positive regulation of cellular component movement	GO:0051272	6.19e-07	6.20823	606	1390	69	27543	SMAD3,ZFP703,PAK1,FGF9,PPP3CA,S1PR1,ERBB4,DAB2IP,AKT2,MYO5A,IQSEC1,PTN,RAPGEF4,DMTN,FBXO31,ACTN4,FAM107A,ADAM9,CXCL14,PTK2,DOCK4,FERMT2,GRIN1,HDAC4,IL12A,HBEGF,PTPRZ1,TBC1D24,PRKCA,SWAP70,PGR,APC,CXCL12,RELN,ATP2A1,SRC,PRKCE,PTGS2,EGR1,MGAT5,FOXP1,ITGAV,SMOC2,PODXL,LAMC2,SUN2,NUMB,NTRK3,IGF1R,KITL,ARHGEF2,PDPK1,ROCK2,AKT3,SPRY2,PTP4A1,EGFR,GCNT2,ADAMTS1,SEMA3G,JAM2,SOX9,BMP2,HGF,ACKR3,NOTCH1,HPSE…
GO:BP	negative regulation of cell motility	GO:2000146	7e-07	6.15482	292	1390	43	27543	PLCB1,NBL1,WNT4,ZMYND8,ADORA1,ABHD6,DAB2IP,PTN,DUSP1,ADARB1,PTPRT,PTK2,NAV3,ATP1B2,SCAI,TPM1,FOXO3,PIN1,CXCL12,PPARD,TRIB1,ACVR1C,ABHD2,DUSP3,MAGI2,ENG,PTPRJ,ACVRL1,SRF,NRG3,SPRED1,OSBPL8,PPARGC1A,PIK3R2,MEF2C,DNAJA4,SLIT2,DUSP22,DRD4,ABCC8,ROBO4,RGCC,NOTCH1
GO:BP	striated muscle cell differentiation	GO:0051146	7.67e-07	6.11524	304	1390	44	27543	SORBS2,PPP3CA,SORT1,MYLK3,CNTNAP1,PTGFRN,RYR1,HOMER1,PLEKHO1,HDAC4,TPM1,PIN1,ADRB1,PLEC,CXCL12,ACTA1,RBPJ,IL4RA,MAPK14,MYH10,FOXP1,MTPN,MYOD1,SRF,CSRP1,TRIM72,SOX6,PPARA,TANC1,STAC3,ADRA1A,HOPX,MEF2C,AKAP6,KLHL40,XK,JAM2,BMP2,BDNF,FHL2,NOTCH1,ALPK2,MYH9,BARX2
GO:BP	cellular response to nitrogen compound	GO:1901699	8.06e-07	6.09364	824	1390	85	27543	PLCB1,LY6E,SORBS2,GRIN2A,PRKCB,ITPR1,ATP2B1,GABRA1,AKT2,MYO5A,INPPL1,GABRB2,SLC1A3,DMTN,RYR1,LRRK2,SLC1A2,PPP1R9B,KLF16,PRKCZ,PIP4K2C,PTK2,KCNQ3,CPEB2,GABRG2,BAIAP2,FOXO3,APC,SMPD3,ACTA1,HCN1,SRC,CDK5R1,CPEB4,NTRK2,PPP1R1B,PTGS2,TMEM38A,ESRRA,ZBTB7B,CACNA1A,TRPM4,EGR1,MAS1,RAB31,CYP11A1,LYPD1,SLC39A14,GPT,RYR2,DDI2,IGF1R,SOCS3,PCSK9,CHRM4,TRIM72,SORL1,ARHGEF2,PDPK1,GPAM,OSBPL8,CACNA2D1,AKT3,HTR1B…
GO:BP	maintenance of synapse structure	GO:0099558	8.34e-07	6.07885	34	1390	14	27543	DGKZ,GIT1,DLG4,BSN,DLGAP1,SHANK1,SHANK3,ERC2,SYNGAP1,PCLO,MAGI2,MPP2,DLG1,SHANK2
GO:BP	cardiac chamber development	GO:0003205	8.54e-07	6.06879	188	1390	33	27543	ZFPM1,LY6E,TNNC1,HEG1,FGF9,MYBPC3,PLXND1,LUZP1,LMO4,FGFRL1,TPM1,RBPJ,DHRS3,MYH10,KCNK2,ENG,RBP4,PTK7,MYH7,SRF,RYR2,IGF1R,DVL3,ANK2,MEF2C,MED1,ADAMTS1,SLIT2,BMP2,SMARCA4,FHL2,NOTCH1,EDNRA
GO:BP	regulation of synaptic vesicle exocytosis	GO:2000300	8.86e-07	6.05272	81	1390	21	27543	NRN1,GIT1,PRKCB,CALM1,RIMS3,ADCY1,SYT1,RIMS4,LRRK2,CACNB4,APBA2,CNR1,NRXN3,STXBP5L,PRKCE,GIPC1,HTR1B,SLC4A8,DGKI,ADRA1A,DRD4
GO:BP	maintenance of postsynaptic density structure	GO:0099562	9.45e-07	6.02465	12	1390	9	27543	DGKZ,DLG4,DLGAP1,SHANK1,SHANK3,MAGI2,MPP2,DLG1,SHANK2
GO:BP	gliogenesis	GO:0042063	1.03e-06	5.98883	341	1390	47	27543	LINGO1,BOK,CDK5R2,DAB2IP,AKT2,PTN,CNTNAP1,GPR37L1,PPP3R1,SHANK3,ZMIZ1,PTK2,SUN1,GRIN1,ATP1B2,PTPRZ1,LGI4,ZFP365,KCNJ10,NR1D1,DAB1,PLEC,EGR2,RELN,PPARG,CDK5R1,NFE2L1,NTRK2,BACE2,SUN2,GLI3,ASCL1,NFIX,NTRK3,METRN,SNW1,SOX5,SOX6,ADAM22,GPR17,QK,EGFR,SOX9,ABCC8,BMP2,SMARCA4,NOTCH1
GO:BP	regulation of hydrolase activity	GO:0051336	1.1e-06	5.95706	1026	1390	99	27543	SIPA1L1,ASAP1,SMAD3,CALM1,SLC39A10,WNT4,WNT9A,PLXND1,CYFIP2,BOK,RAP1GAP2,S1PR1,RTN4R,RGS7,TBC1D30,ARAP2,RASGEF1B,SORT1,RAPGEFL1,DAB2IP,AKT2,IQSEC1,RAPGEF4,ADAP1,CRY2,TBC1D22A,FGD6,EFNA5,RASGRP1,LRRK2,PPP1R9B,NET1,PRKCZ,RASGEF1A,FERMT2,GRIN1,CPEB2,RASAL2,FGFR3,GARNL3,MAPK9,SYNGAP1,WFDC18,PIN1,ADRB1,SERPINI1,ARRB1,SRC,ASAP2,RASGEF1C,RAP1GDS1,PRSS22,TTBK1,PLXNA4,NTRK2,SH3BP1,PPP1R1B,ACVR1C,PTGS2,ARH…
GO:BP	negative regulation of protein modification process	GO:0031400	1.28e-06	5.89278	526	1390	62	27543	ARPP19,GFRA2,HEG1,DUSP7,SENP2,DAB2IP,INPPL1,CRY2,DUSP1,RASSF2,HSPA1B,DMTN,CADM4,ADARB1,LRRK2,PPP1R9B,HHATL,SIRPA,PRKAR1B,PRKCZ,PTPRT,SRCIN1,PTPRB,TBC1D24,SWAP70,APC,PLEC,ARRB1,HIPK3,TRIB1,PKIG,PRKCE,PPP1R1B,ZFYVE28,DUSP3,DUSP6,MGAT5,MAS1,OXR1,MLLT1,ENG,PTPRJ,MLLT6,MAPK8IP1,NTRK3,SPRED1,SOCS3,SORL1,PDPK1,PPARGC1A,ROCK2,SPRY2,BCOR,KLHL40,MPRIP,WWTR1,SLIT2,DUSP22,KIRREL2,DEPTOR,BMP2,HGF
GO:BP	peptidyl-serine modification	GO:0018209	1.29e-06	5.88829	355	1390	48	27543	NLK,PRKCB,PAK1,MAST3,LMTK2,NRXN1,AKT2,TFRC,RASSF2,DMTN,RAMP3,LRRK2,BRSK2,PRKCZ,CSNK1G2,MAPK9,CAMK1G,MAPK12,ARRB1,SRC,CDK5R1,HIPK3,PRKCE,TTBK1,NTRK2,MARK2,RPS6KA2,MAPK14,PTGS2,BRSK1,OPRD1,DCLK1,FNIP1,RPS6KA3,MKNK2,NTRK3,TNKS1BP1,MAP3K10,CD44,PDPK1,ROCK2,AKT3,SPRY2,EGFR,HIPK2,BDNF,HGF,SYK
GO:BP	regulation of fat cell differentiation	GO:0045598	1.39e-06	5.85758	143	1390	28	27543	ZFPM1,CCDC3,SMAD3,JDP2,MEDAG,RORA,SORT1,DKKL1,CDS1,ZBTB16,FERMT2,METRNL,NR1D1,FRZB,PPARD,PPARG,MAPK14,PTGS2,CEBPA,ZBTB7B,TRPM4,PIM1,NCOR2,DDIT3,WWTR1,YAP1,BMP2,INSIG1
GO:BP	sodium ion transmembrane transport	GO:0035725	1.41e-06	5.85087	162	1390	30	27543	PLCB1,PTPN3,SLC24A2,CACNA1I,ATP1A1,SCN8A,NETO2,SLC6A1,SCN1B,TESC,HECW1,SLC4A11,ATP1B2,SLC9A5,HCN1,SLC6A17,HECW2,SLC4A4,TRPM4,SLC24A3,ATP1A2,KCNK1,PCSK9,SLC8A2,SCNN1A,SLC4A8,ASIC1,ANK3,DRD4,HCN2
GO:BP	sodium ion transport	GO:0006814	1.68e-06	5.77498	245	1390	38	27543	PLCB1,PTPN3,SLC13A5,SLC24A2,CACNA1I,ATP1A1,SCN8A,NETO2,SLC6A1,AKT2,SCN1B,TESC,HECW1,SLC4A11,ATP1B2,SLC9A5,HCN1,SLC6A17,HECW2,SLC4A4,TRPM4,SLC24A3,MLLT6,ATP1A2,KCNK1,PER1,PCSK9,AKT3,SLC8A2,SCNN1A,SLC4A8,ASIC1,EDNRB,SLC38A3,ANK3,DRD4,HCN2,EDNRA
GO:BP	protein localization to plasma membrane	GO:0072659	1.7e-06	5.76988	289	1390	42	27543	TTC7B,PACSIN1,CACNB3,NRXN1,DPP10,RILPL1,KCNIP3,AKT2,MYO5A,RAMP3,TESC,PPP1R9B,TSPAN5,PRKCZ,STXBP1,TTC7,RAMP1,ANK1,TSPAN33,KCNJ11,ZDHHC2,LRP1,AKAP5,DLG1,FAM126B,RAB31,RAB40C,NUMB,ACSL3,LYPD1,DDI2,PDPK1,ROCK2,RAB3C,PIK3R2,STAC3,SLC4A1,ANK2,EGFR,VTI1B,ANK3,NFASC
GO:BP	protein-containing complex localization	GO:0031503	1.73e-06	5.76306	193	1390	33	27543	GIT1,SNAP25,DLG4,PACSIN1,ARC,KIF5C,PIP5K1C,IQSEC2,NRXN1,STX1B,IQSEC1,RAPGEF4,PPP3R1,CLSTN1,NPTN,PRKCZ,CACNG2,ZFP365,TUB,RELN,CPLX1,ANKS1B,MAGI2,AKAP5,DLG1,NUMB,NACC2,STAU2,ADAM22,AKAP6,RCC2,NPTX1,DRD4
GO:BP	neuron death	GO:0070997	1.76e-06	5.75549	418	1390	53	27543	FBXW7,NOS1AP,WFS1,ITPR1,BOK,ADORA1,TYRO3,RILPL1,KCNIP3,AKT2,GABRB2,BTBD10,ADARB1,LRRK2,GRIN1,STXBP1,HDAC4,GRIK5,PTPRZ1,SYNGAP1,TBC1D24,FOXO3,PIN1,CIT,DIO3,AGAP2,ARRB1,CDK5R1,CPEB4,NTRK2,CACNA1A,EGR1,OXR1,FZD9,ASCL1,DDIT3,AXL,PCSK9,SORL1,PDPK1,PPARGC1A,PPARA,ATF4,MEF2C,PTPRF,NES,SIGMAR1,HIPK2,EPHB1,BDNF,CDC34,SNCB,ADAM8
GO:BP	Ras protein signal transduction	GO:0007265	1.96e-06	5.70747	336	1390	46	27543	STARD8,DGKZ,GIT1,HEG1,RTN4R,IQSEC2,RASGEF1B,RAPGEFL1,DAB2IP,IQSEC1,RAPGEF4,CADM4,MRAS,RASGRP1,NET1,RASGEF1A,SCAI,SYNGAP1,BAIAP2,RAB15,ADRB1,ARRB1,PSD3,EPS8L2,RASGEF1C,SH3BP1,MADD,ARHGAP42,WASF1,ARHGAP35,KITL,ARHGEF2,ROCK2,SPRY2,AUTS2,GPR17,DGKI,ADRA1A,ARHGEF25,ARHGEF3,RAB30,BRK1,DOK3,STK19,NOTCH1,EDNRA
GO:BP	cellular response to organonitrogen compound	GO:0071417	2.01e-06	5.69582	757	1390	79	27543	PLCB1,GRIN2A,PRKCB,ITPR1,ATP2B1,GABRA1,AKT2,MYO5A,INPPL1,GABRB2,SLC1A3,DMTN,RYR1,LRRK2,SLC1A2,PPP1R9B,KLF16,PRKCZ,PIP4K2C,PTK2,CPEB2,GABRG2,BAIAP2,FOXO3,APC,SMPD3,ACTA1,HCN1,SRC,CPEB4,NTRK2,PPP1R1B,PTGS2,TMEM38A,ESRRA,ZBTB7B,CACNA1A,TRPM4,EGR1,MAS1,RAB31,CYP11A1,SLC39A14,GPT,RYR2,IGF1R,SOCS3,PCSK9,CHRM4,TRIM72,SORL1,ARHGEF2,PDPK1,GPAM,OSBPL8,CACNA2D1,AKT3,HTR1B,ATF4,PIK3R2,SCNN1A,HTR6,CACNB1,MEF2…
GO:BP	regulation of cytoskeleton organization	GO:0051493	2.04e-06	5.69011	545	1390	63	27543	MAP6D1,GIT1,SMAD3,WNT4,PAK1,GPM6B,TRIM37,CYFIP2,S1PR1,FMN1,PPP1R9A,MYLK3,SHANK1,SPTBN2,MAP1A,HSPA1B,DMTN,EFNA5,SHANK3,SPTB,ARHGEF10L,FAM107A,FERMT2,CTNNA2,NAV3,BAIAP2,TPM1,SWAP70,CIT,APC,CDK5R1,PRKCE,PSRC1,SH3BP1,MARK2,MAP9,CORO2B,DLG1,MTPN,GAS2L1,WASF1,ARHGAP35,NTRK3,STAU2,ARHGEF2,ROCK2,PLXNB1,PIK3R2,TRIM54,CAMSAP1,MEF2C,TWF2,FSCN1,FZD10,NES,BRK1,ADD2,ARHGEF19,SLIT2,DYNC1H1,ESAM,RGCC,RHPN1
GO:BP	positive regulation of neuron projection development	GO:0010976	2.09e-06	5.67941	215	1390	35	27543	PACSIN1,ITPR1,CUX2,PPP1R9A,FUT9,DAB2IP,PTN,SCN1B,NPTN,ACSL6,APBB1,ATP1B2,NEGR1,PTPRZ1,BAIAP2,CNR1,SERPINI1,RELN,NEU1,CRTC1,NTRK2,MARK2,MAGI2,PTK7,ARHGAP35,NTRK3,STAU2,IGF1R,QK,TWF2,CBFA2T2,ADAMTS1,AMIGO1,BDNF,HGF
GO:BP	glutamate receptor signaling pathway	GO:0007215	2.12e-06	5.67304	55	1390	17	27543	PLCB1,GRM2,GRIN2A,GRIA4,DAGLB,SHANK3,HOMER1,GRIN1,GRIK5,HOMER2,CDK5R1,CPEB4,FRRS1L,UNC13A,GRM4,GRIN2C,GRIK3
GO:BP	neuron apoptotic process	GO:0051402	2.27e-06	5.64459	303	1390	43	27543	FBXW7,WFS1,BOK,TYRO3,KCNIP3,AKT2,GABRB2,ADARB1,GRIN1,STXBP1,HDAC4,GRIK5,PTPRZ1,SYNGAP1,FOXO3,PIN1,CIT,DIO3,AGAP2,ARRB1,CDK5R1,CPEB4,NTRK2,CACNA1A,EGR1,OXR1,FZD9,ASCL1,DDIT3,AXL,PCSK9,PDPK1,PPARGC1A,ATF4,MEF2C,PTPRF,NES,SIGMAR1,HIPK2,BDNF,CDC34,SNCB,ADAM8
GO:BP	transforming growth factor beta receptor signaling pathway	GO:0007179	2.31e-06	5.63726	185	1390	32	27543	SMAD3,ZFP703,NLK,LRRC32,VASN,ZMIZ1,ADAM9,PTK2,FERMT2,HTRA1,PIN1,SRC,NREP,RASL11B,GIPC1,ZBTB7A,ACVR1C,ENG,ACVRL1,PEG10,LRG1,SPRED1,SNW1,PDPK1,SPRY2,PPARA,ADAMTSL2,GCNT2,ITGB8,HIPK2,DUSP22,BMP2
GO:BP	regulation of neuron death	GO:1901214	2.31e-06	5.63567	373	1390	49	27543	FBXW7,NOS1AP,WFS1,ITPR1,BOK,ADORA1,TYRO3,RILPL1,KCNIP3,GABRB2,BTBD10,LRRK2,GRIN1,STXBP1,HDAC4,GRIK5,PTPRZ1,SYNGAP1,TBC1D24,FOXO3,PIN1,AGAP2,ARRB1,CDK5R1,CPEB4,NTRK2,CACNA1A,EGR1,OXR1,FZD9,ASCL1,DDIT3,AXL,PCSK9,SORL1,PDPK1,PPARGC1A,PPARA,ATF4,MEF2C,PTPRF,NES,SIGMAR1,HIPK2,EPHB1,BDNF,CDC34,SNCB,ADAM8
GO:BP	positive regulation of hydrolase activity	GO:0051345	2.36e-06	5.62637	547	1390	63	27543	SIPA1L1,ASAP1,SMAD3,CALM1,SLC39A10,WNT4,CYFIP2,BOK,RAP1GAP2,S1PR1,RTN4R,RGS7,TBC1D30,ARAP2,RASGEF1B,RAPGEFL1,AKT2,IQSEC1,RAPGEF4,ADAP1,TBC1D22A,RASGRP1,LRRK2,NET1,PRKCZ,RASGEF1A,FERMT2,GRIN1,FGFR3,GARNL3,MAPK9,PIN1,ADRB1,ARRB1,ASAP2,RASGEF1C,RAP1GDS1,PRSS22,TTBK1,SH3BP1,ACVR1C,ARHGAP42,PREX1,MAGI2,CDKL5,ARHGAP35,NTRK3,SIPA1L2,PDPK1,ROCK2,PLA2G5,PLXNB1,DVL3,ADRA1A,MEF2C,CIDEB,RCC2,FZD10,ARHGEF19,A…
GO:BP	receptor internalization	GO:0031623	2.48e-06	5.6064	128	1390	26	27543	SNAP25,DLG4,PACSIN1,ARC,APLN,PIP5K1C,IQSEC1,TFRC,PPP3R1,RAMP3,ARR3,CACNG2,RAMP1,ARRB1,ANKRD13B,MAGI2,AKAP5,RAB31,NUMB,PCSK9,FMR1,HTR1B,ADM,DRD4,ACKR3,SYK
GO:BP	regulation of dendrite development	GO:0050773	2.48e-06	5.6064	128	1390	26	27543	SIPA1L1,TRPC6,PACSIN1,CUX2,PPP3CA,DAB2IP,PTN,RAPGEF4,PTPRD,FBXO31,GRIN1,HECW1,PTPRZ1,TBC1D24,BAIAP2,RELN,CRTC1,FAT3,NTRK2,HECW2,AKAP5,CDKL5,NUMB,STAU2,PTPRF,LZTS1
GO:BP	cellular response to lipid	GO:0071396	2.52e-06	5.59924	747	1390	78	27543	PLCB1,GIT1,ZFP703,CD6,PAK1,BRINP1,ADCY1,ATP1A1,ATP2B1,RORA,SMARCD1,DAB2IP,OLFR78,BRINP2,CRY2,NR3C1,CDK19,PAQR8,EFNA5,RAMP3,TESC,ZMIZ1,PPP1R9B,FAM107A,ADAM9,FBXO32,SIRPA,IL12A,ESRRG,PRKCA,FOXO3,PGR,NR1D1,ESRRB,PPARD,SRC,PPARG,TRIB1,PRKCE,NFE2L1,NTRK2,ZBTB7A,GRAMD1B,ABHD2,MAPK14,ESRRA,PIM1,FOXP1,MYOD1,PTK7,NCOR2,ATP1A2,KLF9,PER1,NTRK3,EPHX1,AXL,IGF1R,SNW1,ROCK2,PPARA,MEF2C,EGFR,EDNRB,TWF2,MED1,WNT7…
GO:BP	establishment of protein localization	GO:0045184	2.53e-06	5.59722	1671	1390	141	27543	RPH3A,FBXW7,WHRN,SNAP25,CALM1,DLG4,FGF9,GPM6B,PPP3CA,SENP2,RIMS1,KIF5C,ADORA1,LMTK2,ASTN2,SYNDIG1,EXPH5,AP1S1,CACNB3,NRXN1,RAB6B,CDK16,SORT1,RILPL1,STX1B,KCNIP3,SPCS3,AKT2,MYO5A,OLFR78,RAPGEF4,SPIRE1,MYRIP,CRY2,MAP1A,ARF3,TFRC,PPP3R1,DUSP18,DMTN,CLSTN1,EFNA5,RAMP3,GOLGA7B,MYO18A,TESC,ACTN4,LRRK2,ADAM9,BRSK2,PRKCZ,APBB1,ABCB9,SGTB,SRCIN1,STXBP1,CACNG2,IL12A,RAMP1,APBA2,SYTL1,CNR1,NR1D1,FAM160A2,AD…
GO:BP	positive regulation of nucleobase-containing compound metabolic process	GO:0045935	2.69e-06	5.56981	2049	1390	165	27543	PLCB1,NFIC,ZFPM1,SMAD3,ATF6,PRKCB,WNT4,CAMTA2,FGF9,CAMK4,TRIM37,PPP3CA,SENP2,S1PR1,APLN,ZMIZ2,RORA,MAF,ERBB4,DAB2IP,AKT2,ZBTB18,SPIRE1,TFRC,SSBP3,ASH1L,PPP3R1,FOXK1,ADARB1,HIVEP2,ATXN7L3,ZBTB16,TESC,ACTN4,ZMIZ1,ATMIN,PARM1,FOXK2,WWC1,PLAGL1,HES3,LMO4,APBB1,SSBP4,GRIN1,HDAC4,FAM168A,POU2F2,ESRRG,MAPK9,MICAL2,ZFP91,ATAD2,ETV6,FOXO3,PGR,NR1D1,PIN1,IER5,TACC1,ESRRB,EGR2,ZFP148,AGAP2,PPARD,ARRB1,SRC,P…
GO:BP	vocalization behavior	GO:0071625	2.74e-06	5.56298	21	1390	11	27543	DLG4,BRINP1,NRXN1,SHANK1,SHANK3,EXT1,NRXN3,FOXP1,GLI3,SHANK2,AUTS2
GO:BP	negative regulation of phosphorylation	GO:0042326	2.78e-06	5.55549	387	1390	50	27543	GIT1,GFRA2,HEG1,DUSP7,DAB2IP,INPPL1,DUSP1,RASSF2,DMTN,CADM4,ADARB1,LRRK2,SIRPA,PRKAR1B,PRKCZ,PIP4K2C,PTPRT,SRCIN1,HDAC4,PTPRB,APC,PLEC,ARRB1,HIPK3,TRIB1,PKIG,ZFYVE28,DUSP3,DUSP6,MAS1,MLLT1,ENG,PTPRJ,MAPK8IP1,NTRK3,SPRED1,SOCS3,SORL1,PDPK1,PPARGC1A,SPRY2,PPARA,SLC4A1,WWTR1,SLIT2,DUSP22,KIRREL2,DEPTOR,BMP2,HGF
GO:BP	embryo development ending in birth or egg hatching	GO:0009792	2.85e-06	5.54537	804	1390	82	27543	ADCY9,LY6E,SMAD3,ETL4,ETNK2,HEG1,WNT9A,BAP1,FGF9,SENP2,MAN2A1,SLC35E2,ZBTB18,LUZP1,SSBP3,DLX1AS,SPECC1,EXT1,ZMIZ1,CDK2AP1,TLE6,HES3,LMO4,MYO1E,FZD3,SEBOX,HBEGF,APBA2,MIB1,ANKRD11,TPM1,TCOF1,HS6ST1,ESRRB,SHROOM3,CDK5R1,RBPJ,ACVR1C,EPAS1,CEBPA,TBL1XR1,SCX,PLCD3,MYH10,FOXP1,ITGAV,DLG1,RBP4,ACVRL1,PTK7,SRF,NCOR2,GLI3,MBNL1,ARHGAP35,HSD17B7,SOCS3,SOX5,SOX6,AXIN2,DVL3,HOPX,BCOR,CTHRC1,MEF2C,EGFR,MED1,W…
GO:BP	muscle cell development	GO:0055001	2.85e-06	5.54462	207	1390	34	27543	SORBS2,PPP3CA,MYLK3,CNTNAP1,RYR1,HOMER1,ACTN4,HDAC4,CACNB4,TPM1,PIN1,ADRB1,PLEC,ACTA1,MYH10,FOXP1,ACTN1,MYOD1,ENG,SRF,CSRP1,PPARA,STAC3,ADRA1A,ANK2,MEF2C,AKAP6,KLHL40,XK,ADM,FHL2,NOTCH1,ALPK2,EDNRA
GO:BP	cell junction maintenance	GO:0034331	2.91e-06	5.53676	56	1390	17	27543	DGKZ,GIT1,WHRN,DLG4,BSN,DLGAP1,CNTNAP1,SHANK1,SHANK3,ERC2,FERMT2,SYNGAP1,PCLO,MAGI2,MPP2,DLG1,SHANK2
GO:BP	anatomical structure maturation	GO:0071695	3.02e-06	5.51983	272	1390	40	27543	PLCB1,PHOSPHO1,BAP1,S1PR1,NRXN1,CDK5R2,MYO5A,RYR1,EXT1,ZBTB16,LRRK2,NRCAM,GRIN1,POU2F2,LGI4,FOXO3,PGR,CDK5R1,RBPJ,ZBTB7A,RPS6KA2,ABHD2,EPAS1,CEBPA,CACNA1A,EPHA8,AKAP5,ASCL1,DDIT3,AXL,PLXNB1,EDNRB,ANK3,ANKS1,SOX18,CDC25B,NFASC,BMP2,RFX3,EDNRA
GO:BP	dendritic spine morphogenesis	GO:0060997	3.38e-06	5.47114	71	1390	19	27543	SIPA1L1,LZTS3,DLG4,ARC,CUX2,PPP1R9A,SHANK1,SHANK3,LRRK2,CTNND2,SRCIN1,ZFP365,BAIAP2,RELN,CDK5R1,STAU2,ARHGAP33,TANC2,EPHB1
GO:BP	calcium-mediated signaling	GO:0019722	3.4e-06	5.46886	198	1390	33	27543	CAMKK2,GRIN2A,CALM1,ITPR1,PPP3CA,PPP1R9A,MYH7B,PPP3R1,DMTN,LRRK2,PPP1R9B,GRIN1,HDAC4,HOMER2,ITGAL,NTRK2,TMEM38A,TRPM4,AKAP5,HTT,ACKR2,RYR2,PDPK1,SLC8A2,GRIN2C,ANK2,SLA2,EDNRB,AKAP6,DRD4,FHL2,ACKR3,SYK
GO:BP	regulation of transcription, DNA-templated	GO:0006355	3.46e-06	5.46085	3474	1390	251	27543	SCRT1,PLCB1,NFIC,ZFPM1,SMAD3,CUX1,KCTD1,ZFP703,ATF6,NLK,PRKCB,WNT4,RASD1,BAP1,JDP2,CAMTA2,FGF9,CAMK4,WFS1,ADCY1,CUX2,ZMYND8,TRIM37,PPP3CA,SENP2,S1PR1,APLN,ZMIZ2,RORA,PKNOX2,CDK16,MAF,ERBB4,SMARCD1,DAB2IP,KCNIP3,AKT2,ZBTB18,CRY2,NR3C1,TFRC,SSBP3,ASH1L,HEY1,PPP3R1,HSPA1B,CXXC5,FOXK1,VGLL4,POU6F1,HIVEP2,ATXN7L3,SBNO1,ZBTB16,BHLHE40,TESC,ACTN4,ZMIZ1,ATMIN,FOXK2,TLE6,KLF16,WWC1,PLAGL1,HES3,LMO4,HR,PRK…
GO:BP	protein transport	GO:0015031	3.5e-06	5.45548	1556	1390	133	27543	RPH3A,FBXW7,SNAP25,FGF9,GPM6B,PPP3CA,SENP2,RIMS1,KIF5C,ADORA1,LMTK2,ASTN2,SYNDIG1,EXPH5,AP1S1,CACNB3,RAB6B,CDK16,SORT1,RILPL1,STX1B,KCNIP3,SPCS3,AKT2,MYO5A,OLFR78,RAPGEF4,SPIRE1,MYRIP,CRY2,MAP1A,ARF3,TFRC,PPP3R1,DUSP18,DMTN,CLSTN1,EFNA5,RAMP3,GOLGA7B,MYO18A,TESC,ACTN4,LRRK2,ADAM9,BRSK2,PRKCZ,APBB1,ABCB9,SGTB,SRCIN1,STXBP1,CACNG2,IL12A,RAMP1,APBA2,SYTL1,CNR1,NR1D1,FAM160A2,ADRB1,ZDHHC21,EGR2,PDE8B…
GO:BP	negative regulation of cell death	GO:0060548	3.52e-06	5.45317	1180	1390	108	27543	NOS1AP,SMAD3,SLC39A10,WNT4,WNT9A,WFS1,ITPR1,CCNG1,BOK,ADORA1,TYRO3,ARHGAP10,LIFR,GRIA4,ERBB4,AKT2,GABRB2,GPR37L1,DUSP1,MPL,BTBD10,TFRC,TMEM132A,HSPA1B,MYO18A,LRRK2,PRKCZ,MERTK,PTK2,FERMT2,GRIN1,STXBP1,FZD3,PTPRZ1,SYNGAP1,TBC1D24,PRKCA,PGR,PIN1,TLE1,CXCL12,AGAP2,PPARD,ARRB1,SRC,HIPK3,CPEB4,PRKCE,NTRK2,RB1CC1,PTGS2,CACNA1A,SCX,PIM1,HTT,FOXP1,ITGAV,NPAS2,OXR1,TMEM14A,FZD9,FNIP1,GLI3,MAPK8IP1,ASCL1,R…
GO:BP	regulation of nucleic acid-templated transcription	GO:1903506	3.56e-06	5.44909	3475	1390	251	27543	SCRT1,PLCB1,NFIC,ZFPM1,SMAD3,CUX1,KCTD1,ZFP703,ATF6,NLK,PRKCB,WNT4,RASD1,BAP1,JDP2,CAMTA2,FGF9,CAMK4,WFS1,ADCY1,CUX2,ZMYND8,TRIM37,PPP3CA,SENP2,S1PR1,APLN,ZMIZ2,RORA,PKNOX2,CDK16,MAF,ERBB4,SMARCD1,DAB2IP,KCNIP3,AKT2,ZBTB18,CRY2,NR3C1,TFRC,SSBP3,ASH1L,HEY1,PPP3R1,HSPA1B,CXXC5,FOXK1,VGLL4,POU6F1,HIVEP2,ATXN7L3,SBNO1,ZBTB16,BHLHE40,TESC,ACTN4,ZMIZ1,ATMIN,FOXK2,TLE6,KLF16,WWC1,PLAGL1,HES3,LMO4,HR,PRK…
GO:BP	response to steroid hormone	GO:0048545	3.58e-06	5.4466	354	1390	47	27543	CALM1,PAK1,ATP1A1,ATP2B1,OLFR78,CRY2,NR3C1,PAQR8,ZMIZ1,LCAT,PPP1R9B,FAM107A,ADAM9,FBXO32,ESRRG,FOXO3,PGR,ESRRB,ACTA1,SRC,NTRK2,ZBTB7A,ABHD2,PTGS2,ESRRA,FOXP1,MYOD1,ENG,NCOR2,ATP1A2,KLF9,PER1,NTRK3,EPHX1,IGF1R,ACSBG1,HTR1B,PPARA,EGFR,MED1,ADM,SLIT2,YAP1,BDNF,SMARCA4,NOTCH1,CRH
GO:BP	transcription by RNA polymerase II	GO:0006366	3.84e-06	5.41542	2560	1390	196	27543	SCRT1,NFIC,ZFPM1,SMAD3,CUX1,ATF6,PRKCB,JDP2,CAMTA2,FGF9,WFS1,CUX2,TRIM37,PPP3CA,SENP2,S1PR1,ZMIZ2,RORA,PKNOX2,MAF,SMARCD1,DAB2IP,KCNIP3,AKT2,ZBTB18,CRY2,SSBP3,ASH1L,HEY1,PPP3R1,HSPA1B,CXXC5,FOXK1,POU6F1,HIVEP2,ATXN7L3,ZBTB16,BHLHE40,ZMIZ1,ATMIN,FOXK2,TLE6,KLF16,WWC1,PLAGL1,HES3,LMO4,HR,APBB1,SSBP4,GRIN1,SCRT2,HDAC4,POU2F2,ESRRG,MICAL2,ZFP91,ATAD2,ETV6,FOXO3,PGR,NR1D1,PIN1,IER5,CBX6,ESRRB,EGR2,TLE…
GO:BP	wound healing	GO:0042060	3.96e-06	5.40208	391	1390	50	27543	SMAD3,WNT4,PAK1,TYRO3,PIP5K1C,MPL,DMTN,CADM4,EXT1,MYH2,MERTK,PTK2,FERMT2,ADRA2C,STXBP1,HBEGF,DCBLD2,PRKCA,TPM1,ADRB1,FGFR1OP2,PLEC,PPARD,PPARG,PRKCE,MYH10,SMOC2,ENG,ACVRL1,PTK7,SRF,GLI3,ARHGAP35,LRG1,AXL,CD44,TRIM72,PPARA,SLC4A1,EGFR,PRCP,ST3GAL4,TNFRSF12A,ARHGEF19,YAP1,ABCC8,VWF,SYK,HPSE,MYH9
GO:BP	receptor clustering	GO:0043113	4.38e-06	5.35902	72	1390	19	27543	SORBS2,DLG4,CHRDL1,ARHGEF9,NRXN1,PTN,GLRB,SHANK3,GRIK5,SYNGAP1,RELN,ITGAL,LRP4,ZDHHC2,CACNA1A,MAGI2,AKAP5,DLG1,FZD9
GO:BP	receptor localization to synapse	GO:0097120	4.38e-06	5.35902	72	1390	19	27543	GIT1,SNAP25,DLG4,KIF5C,IQSEC2,NRXN1,STX1B,RAPGEF4,CLSTN1,NPTN,PRKCZ,CACNG2,RELN,CPLX1,ANKS1B,MAGI2,DLG1,ADAM22,NPTX1
GO:BP	regulation of RNA biosynthetic process	GO:2001141	4.41e-06	5.35537	3483	1390	251	27543	SCRT1,PLCB1,NFIC,ZFPM1,SMAD3,CUX1,KCTD1,ZFP703,ATF6,NLK,PRKCB,WNT4,RASD1,BAP1,JDP2,CAMTA2,FGF9,CAMK4,WFS1,ADCY1,CUX2,ZMYND8,TRIM37,PPP3CA,SENP2,S1PR1,APLN,ZMIZ2,RORA,PKNOX2,CDK16,MAF,ERBB4,SMARCD1,DAB2IP,KCNIP3,AKT2,ZBTB18,CRY2,NR3C1,TFRC,SSBP3,ASH1L,HEY1,PPP3R1,HSPA1B,CXXC5,FOXK1,VGLL4,POU6F1,HIVEP2,ATXN7L3,SBNO1,ZBTB16,BHLHE40,TESC,ACTN4,ZMIZ1,ATMIN,FOXK2,TLE6,KLF16,WWC1,PLAGL1,HES3,LMO4,HR,PRK…
GO:BP	regulation of lipid metabolic process	GO:0019216	4.75e-06	5.32311	381	1390	49	27543	DGKZ,CCDC3,WNT4,ATP1A1,ADORA1,RORA,ABHD6,GOLM1,DKKL1,ERBB4,DAB2IP,AKT2,LPGAT1,DAGLB,THRSP,PIP4K2C,TTC39B,FGFR3,MAPK9,CNR1,NR1D1,SMPD3,PDE8B,PPARD,STARD4,SRC,PPARG,PRKCE,NFE2L1,PTGS2,CLCN2,EPHA8,TBL1XR1,EGR1,ACSL3,SREBF2,IGF1R,SORL1,GPAM,PPARGC1A,PPARA,SAMD8,SEC14L2,TM6SF2,NR1D2,SOX9,VAV3,BMP2,INSIG1
GO:BP	negative regulation of cell development	GO:0010721	5.04e-06	5.2976	201	1390	33	27543	FBXW7,LINGO1,TRPC6,BRINP1,PPP3CA,RTN4R,FSTL4,PTN,GPR37L1,DMTN,EFNA5,ACTN4,PTK2,SYNGAP1,NR1D1,DAB1,DIP2B,FRZB,CDK5R1,LRP4,NTRK3,SORL1,ARHGEF2,EDNRB,PTPRS,WNT7B,RCC2,SEMA3G,SLIT2,ABCC8,BDNF,PTHLH,NOTCH1
GO:BP	response to lipid	GO:0033993	5.69e-06	5.24509	1102	1390	102	27543	PLCB1,GIT1,ZFP703,DIO2,CD6,CALM1,PAK1,BRINP1,ADCY1,ATP1A1,ATP2B1,RORA,SLC6A1,SMARCD1,DAB2IP,OLFR78,BRINP2,CRY2,NR3C1,CDK19,TFRC,PAQR8,EFNA5,RAMP3,TESC,ZMIZ1,LCAT,PPP1R9B,FAM107A,ADAM9,FBXO32,SIRPA,STXBP1,IL12A,ESRRG,PRKCA,CNR1,FOXO3,PGR,NR1D1,ESRRB,ACTA1,PPARD,SRC,PPARG,KCNJ11,TRIB1,PRKCE,NFE2L1,NTRK2,ZBTB7A,GRAMD1B,ABHD2,MAPK14,PTGS2,ESRRA,PIM1,FOXP1,MYOD1,ENG,RBP4,PTK7,NCOR2,ATP1A2,KLF9,PER1,AS…
GO:BP	response to insulin	GO:0032868	5.77e-06	5.23872	278	1390	40	27543	PLCB1,PRKCB,ATP2B1,SORT1,AKT2,MYO5A,INPPL1,CRY2,PRKCZ,PIP4K2C,CPEB2,APC,EGR2,SRC,ACVR1C,MAPK14,ESRRA,ZBTB7B,EGR1,RAB31,RBP4,SLC39A14,GPT,IGF1R,SOCS3,PCSK9,TRIM72,SORL1,PDPK1,GPAM,OSBPL8,AKT3,PPARA,PIK3R2,SMARCC1,PTPRF,ADM,ABCC8,INSIG1,GPR21
GO:BP	focal adhesion assembly	GO:0048041	5.87e-06	5.23135	81	1390	20	27543	SMAD3,WNT4,GPM6B,FMN1,DMTN,EFNA5,FAM107A,PTK2,FERMT2,SRC,DUSP3,CORO2B,ITGAV,ACTN1,PTPRJ,ACVRL1,PDPK1,RCC2,DUSP22,RHPN1
GO:BP	muscle cell proliferation	GO:0033002	5.96e-06	5.22458	256	1390	38	27543	FGF9,S1PR1,APLN,ERBB4,VGLL4,PTK2,HDAC4,IL12A,HBEGF,TPM1,NDRG2,SMPD3,PPARD,PPARG,RBPJ,TRIB1,MEF2D,MAPK14,PTGS2,EGR1,PIM1,KCNK2,FOXP1,RBP4,DDIT3,IGF1R,PPARGC1A,HTR1B,MEF2C,EGFR,ADAMTS1,MAPK11,YAP1,DRD4,EPHB1,BMP2,NOTCH1,EDNRA
GO:BP	anion transport	GO:0006820	6.45e-06	5.1907	548	1390	62	27543	GABRD,ANO3,GRM2,STARD10,SLC13A5,SLC24A2,LRRC8B,SFXN5,GABRA1,ADORA1,SLC25A23,SLC6A1,SLC16A6,GABRB2,TTYH1,CRY2,SLC1A3,SLC23A3,GLRB,SLC25A18,SLC1A2,SLC12A5,STXBP1,SLC4A11,GABRG2,CACNB4,SLCO2A1,MAPK9,SLC9A5,KCNJ10,NFE2L1,TTYH3,NTRK2,MFSD12,SLC6A17,SLC36A1,GIPC1,PTGS2,CLCN2,CACNA1A,SLC4A4,SLC25A22,SLC24A3,SLC39A14,PLA2G5,HTR1B,ATF4,HTR6,SLC4A8,SLC4A1,LRRC8C,AQP6,SLC38A3,ATP8B1,PLEKHA8,SLC25A42,GPR89,D…
GO:BP	negative regulation of locomotion	GO:0040013	6.46e-06	5.18981	325	1390	44	27543	PLCB1,NBL1,WNT4,ZMYND8,ADORA1,ABHD6,DAB2IP,PTN,DUSP1,ADARB1,PTPRT,PTK2,NAV3,ATP1B2,SCAI,TPM1,FOXO3,PIN1,CXCL12,PPARD,TRIB1,ACVR1C,ABHD2,DUSP3,MAGI2,ENG,PTPRJ,ACVRL1,SRF,NRG3,SPRED1,OSBPL8,PPARGC1A,PIK3R2,MEF2C,DNAJA4,SEMA3G,SLIT2,DUSP22,DRD4,ABCC8,ROBO4,RGCC,NOTCH1
GO:BP	postsynapse assembly	GO:0099068	6.9e-06	5.16132	33	1390	13	27543	SIPA1L1,ARHGEF9,NRXN1,PTPRD,SHANK3,RELN,LRP4,NTNG2,MAGI2,NUMB,NTRK3,PTPRS,NPTX1
GO:BP	cellular response to steroid hormone stimulus	GO:0071383	6.93e-06	5.15907	214	1390	34	27543	PAK1,ATP1A1,ATP2B1,OLFR78,CRY2,NR3C1,PAQR8,ZMIZ1,FAM107A,FBXO32,ESRRG,FOXO3,PGR,ESRRB,SRC,NTRK2,ZBTB7A,ABHD2,ESRRA,FOXP1,MYOD1,NCOR2,ATP1A2,KLF9,PER1,EPHX1,IGF1R,PPARA,EGFR,MED1,YAP1,BDNF,SMARCA4,CRH
GO:BP	regulation of neuron apoptotic process	GO:0043523	7.32e-06	5.13546	269	1390	39	27543	FBXW7,WFS1,BOK,TYRO3,KCNIP3,GABRB2,GRIN1,STXBP1,HDAC4,GRIK5,PTPRZ1,SYNGAP1,FOXO3,PIN1,AGAP2,ARRB1,CDK5R1,CPEB4,NTRK2,CACNA1A,EGR1,OXR1,FZD9,ASCL1,DDIT3,AXL,PCSK9,PDPK1,PPARGC1A,ATF4,MEF2C,PTPRF,NES,SIGMAR1,HIPK2,BDNF,CDC34,SNCB,ADAM8
GO:BP	positive regulation of developmental growth	GO:0048639	8.41e-06	5.07514	205	1390	33	27543	PLCB1,CPNE9,SYT2,FGF9,RIMS1,ERBB4,EFNA5,SYT1,PIN1,ADRB1,DIO3,CXCL12,PPARD,RBPJ,MAPK14,UNC13A,PIM1,CDKL5,DLG1,MYOD1,SRF,NTRK3,GPAM,HOPX,MEF2C,TWF2,AKAP6,TNFRSF12A,YAP1,DSCAM,BDNF,NOTCH1,GPR21
GO:BP	nerve development	GO:0021675	9.29e-06	5.03213	83	1390	20	27543	KCNA2,GABRB2,SLC1A3,ADARB1,EXT1,HES3,EGR2,RNF165,PLXNA4,UNC13A,GLI3,UNC13B,ATP8B1,NPTX1,NRTN,EPHB1,BDNF,ACKR3,EDNRA,NAV2
GO:BP	regulation of cell size	GO:0008361	9.54e-06	5.02054	206	1390	33	27543	MGLL,TTL,OLFM1,ATP2B2,RAP1GAP2,RTN4R,FSTL4,EFNA5,SHANK3,SLC12A5,CXCL12,DIP2B,CDK5R1,PLXNA4,RB1CC1,CDKL5,MTPN,SRF,NTRK3,PRR16,AKT3,AQP4,TWF2,PTPRS,XK,TNFRSF12A,SEMA3G,SLIT2,AQP11,DEPTOR,DSCAM,VAV3,BDNF
GO:BP	organic cyclic compound biosynthetic process	GO:1901362	9.95e-06	5.00228	4203	1390	291	27543	SCRT1,ADCY9,PLCB1,NFIC,ZFPM1,SMAD3,CUX1,KCTD1,ZFP703,ATF6,NLK,PRKCB,WNT4,RASD1,BAP1,JDP2,CAMTA2,FGF9,CAMK4,WFS1,ADCY1,CUX2,ATP1A1,ZMYND8,TRIM37,PPP3CA,SENP2,S1PR1,APLN,GUCY2G,ZMIZ2,RORA,PKNOX2,CDK16,MAF,DKKL1,ERBB4,SMARCD1,DAB2IP,KCNIP3,AKT2,MYO5A,ZBTB18,CYP39A1,CRY2,NR3C1,DUSP1,TFRC,SSBP3,ASH1L,HEY1,PPP3R1,HSPA1B,CXXC5,FOXK1,HSD11B1,VGLL4,POU6F1,HIVEP2,ATXN7L3,SBNO1,ZBTB16,BHLHE40,TESC,ACTN4,ZMI…
GO:BP	anatomical structure homeostasis	GO:0060249	1.01e-05	4.99442	318	1390	43	27543	WHRN,ATP2B2,BAP1,ATP2B1,S1PR1,ADORA1,TYRO3,ERBB4,MAP1A,TFRC,E030003E18RIK,HOMER1,EXT1,ATP1B2,ANKRD11,HOMER2,ESRRB,TUB,SRC,EPAS1,PTGS2,CACNA1A,SCX,ITGAV,RBP4,SRF,CALB1,VHL,INPP5D,CD7,AKT3,SLC8A2,HTR1B,EGFR,APBB2,GCNT2,WWTR1,YAP1,SOX9,ABCC8,SYK,NOTCH1,ADAM8
GO:BP	regulation of Ras protein signal transduction	GO:0046578	1.01e-05	4.99437	196	1390	32	27543	STARD8,DGKZ,GIT1,HEG1,RTN4R,IQSEC2,DAB2IP,IQSEC1,CADM4,RASGRP1,NET1,RASGEF1A,SCAI,SYNGAP1,ARRB1,PSD3,EPS8L2,SH3BP1,MADD,ARHGAP42,ARHGAP35,KITL,ARHGEF2,SPRY2,AUTS2,GPR17,DGKI,ADRA1A,ARHGEF25,ARHGEF3,STK19,NOTCH1
GO:BP	myotube differentiation	GO:0014902	1.02e-05	4.99169	127	1390	25	27543	PPP3CA,SORT1,CNTNAP1,PTGFRN,RYR1,HOMER1,PLEKHO1,HDAC4,PLEC,CXCL12,ACTA1,IL4RA,MAPK14,MYOD1,TRIM72,TANC1,STAC3,MEF2C,KLHL40,XK,JAM2,BDNF,NOTCH1,MYH9,BARX2
GO:BP	lung development	GO:0030324	1.03e-05	4.98664	228	1390	35	27543	FBXW7,HEG1,FGF9,MAN2A1,MAN1A2,PPP3R1,HSD11B1,EXT1,PGR,HS6ST1,SMPD3,RBPJ,EPAS1,CEBPA,CLCN2,FOXP1,RBP4,PTK7,SRF,NCOR2,GLI3,ASCL1,TNS3,SPRY2,RSPO2,HOPX,EGFR,ADAMTSL2,STK40,CIC,WNT7B,YAP1,SOX9,NOTCH1,CRH
GO:BP	action potential	GO:0001508	1.04e-05	4.9837	146	1390	27	27543	PTPN3,GRIN2A,KCNA2,CALM1,KCNA1,CACNA1I,CACNB3,CNTNAP1,RAPGEF4,SCN1B,NRCAM,CACNB4,CNR1,HCN1,NTRK2,TRPM4,KCNN2,FOXP1,DLG1,NTRK3,RYR2,CACNA2D1,FMR1,SLC8A2,ADRA1A,ANK2,ANK3
GO:BP	negative regulation of protein phosphorylation	GO:0001933	1.05e-05	4.97676	342	1390	45	27543	GFRA2,HEG1,DUSP7,DAB2IP,INPPL1,DUSP1,RASSF2,DMTN,CADM4,ADARB1,LRRK2,SIRPA,PRKAR1B,PRKCZ,PTPRT,SRCIN1,PTPRB,APC,PLEC,ARRB1,HIPK3,TRIB1,PKIG,ZFYVE28,DUSP3,DUSP6,MAS1,MLLT1,ENG,PTPRJ,MAPK8IP1,NTRK3,SPRED1,SOCS3,SORL1,PDPK1,PPARGC1A,SPRY2,WWTR1,SLIT2,DUSP22,KIRREL2,DEPTOR,BMP2,HGF
GO:BP	regulation of blood circulation	GO:1903522	1.15e-05	4.93958	262	1390	38	27543	MGLL,NOS1AP,CALM1,MYL4,ATP1A1,ATP2B1,APLN,ADORA1,ADRA1B,SCN1B,DOCK4,ADRA2C,HDAC4,HBEGF,PDE5A,TPM1,ADRB1,ZDHHC21,ATP2A1,EPAS1,PTGS2,TMEM38A,ARHGAP42,TRPM4,KCNN2,DLG1,MYH7,ATP1A2,RYR2,CACNA2D1,ADRA1A,HOPX,ANK2,EGFR,EDNRB,AKAP6,ADM,EDNRA
GO:BP	neuron projection extension	GO:1990138	1.15e-05	4.9386	197	1390	32	27543	MGLL,TTL,NRN1,CPNE9,SYT2,OLFM1,CYFIP2,RIMS1,RTN4R,SYT1,PRKCZ,CXCL12,DIP2B,CDK5R1,NRN1L,PLXNA4,UNC13A,CDKL5,WASF1,DCLK1,SRF,NTRK3,AUTS2,TWF2,PTPRS,TNFRSF12A,SEMA3G,SLIT2,BCAN,DSCAM,BDNF,EDNRA
GO:BP	chordate embryonic development	GO:0043009	1.25e-05	4.9047	788	1390	79	27543	ADCY9,LY6E,SMAD3,ETL4,ETNK2,HEG1,WNT9A,BAP1,FGF9,SENP2,MAN2A1,SLC35E2,ZBTB18,LUZP1,SSBP3,DLX1AS,SPECC1,EXT1,ZMIZ1,CDK2AP1,HES3,LMO4,MYO1E,FZD3,HBEGF,APBA2,MIB1,ANKRD11,TPM1,TCOF1,HS6ST1,ESRRB,SHROOM3,RBPJ,ACVR1C,EPAS1,CEBPA,TBL1XR1,SCX,PLCD3,MYH10,FOXP1,ITGAV,DLG1,RBP4,ACVRL1,PTK7,SRF,NCOR2,GLI3,MBNL1,ARHGAP35,HSD17B7,SOCS3,SOX5,SOX6,AXIN2,DVL3,HOPX,BCOR,CTHRC1,MEF2C,EGFR,MED1,WNT7B,BRK1,SOX18,TA…
GO:BP	regulation of macromolecule biosynthetic process	GO:0010556	1.28e-05	4.89419	3953	1390	276	27543	SCRT1,PLCB1,NFIC,ZFPM1,SMAD3,CUX1,KCTD1,ZFP703,ATF6,NLK,PRKCB,WNT4,RASD1,BAP1,JDP2,CAMTA2,FGF9,CAMK4,WFS1,ADCY1,CUX2,ZMYND8,TRIM37,PPP3CA,SENP2,S1PR1,APLN,ZMIZ2,RORA,PKNOX2,CDK16,MAF,ERBB4,SMARCD1,DAB2IP,KCNIP3,AKT2,ZBTB18,CRY2,NR3C1,DUSP1,TFRC,SSBP3,ASH1L,HEY1,PPP3R1,HSPA1B,CXXC5,FOXK1,VGLL4,SLC25A37,POU6F1,HIVEP2,ATXN7L3,SBNO1,ZBTB16,BHLHE40,TESC,ACTN4,ZMIZ1,ATMIN,LRRK2,PARM1,FOXK2,TLE6,HHATL,K…
GO:BP	ameboidal-type cell migration	GO:0001667	1.32e-05	4.87941	430	1390	52	27543	FBXW7,PLXND1,ERBB4,DAB2IP,BMPER,IQSEC1,PTN,DMTN,ADAM9,PTK2,HBEGF,PRKCA,PLEC,CXCL12,PPARD,SRC,PRKCE,SH3BP1,GIPC1,ACVR1C,PTGS2,FOXP1,ITGAV,SMOC2,ACVRL1,SRF,VHL,LRG1,SPRED1,KITL,PDLIM1,PDPK1,ROCK2,AKT3,PIK3R2,MEF2C,EDNRB,RCC2,PRCP,SOX18,DNAJA4,SEMA3G,SLIT2,NRTN,SCHIP1,SOX9,RGCC,NOTCH1,MYH9,EDNRA,TNS1,ADAM8
GO:BP	regulation of long-term synaptic potentiation	GO:1900271	1.32e-05	4.87863	54	1390	16	27543	ARC,ADCY1,ADORA1,PPP1R9A,PTN,SHANK3,NPTN,FAM107A,PRKAR1B,ADRB1,RELN,CRTC1,ZDHHC2,AKAP5,IGSF11,CALB1
GO:BP	mesenchyme development	GO:0060485	1.32e-05	4.87845	286	1390	40	27543	SMAD3,ZFP703,OLFM1,WNT4,FGF9,ERBB4,DAB2IP,VASN,PPP3R1,EXT1,DACT3,FERMT2,TCOF1,ACTA1,FRZB,RBPJ,SCX,WNT10A,ENG,ACVRL1,PTK7,NOTCH4,LRG1,SPRED1,KITL,SPRY2,AXIN2,MEF2C,EDNRB,GCNT2,WNT7B,WWTR1,SEMA3G,YAP1,NRTN,SOX9,BMP2,RGCC,NOTCH1,EDNRA
GO:BP	forebrain cell migration	GO:0021885	1.42e-05	4.84674	69	1390	18	27543	TYRO3,CDK5R2,DAB2IP,ZMIZ1,LRRK2,SUN1,DAB1,CXCL12,RELN,CDK5R1,SUN2,SRF,GLI3,AXL,NRG3,HTR6,EGFR,SLIT2
GO:BP	regulation of calcium ion transmembrane transporter activity	GO:1901019	1.45e-05	4.83944	85	1390	20	27543	NOS1AP,CALM1,CACNB3,MYO5A,JSRP1,JPH3,CACNB4,ATP2A1,STIM2,AHNAK,CACNA1A,HTT,ATP1A2,RYR2,CACNA2D1,STAC3,CACNB1,ANK2,AKAP6,DRD4
GO:BP	respiratory tube development	GO:0030323	1.46e-05	4.83528	231	1390	35	27543	FBXW7,HEG1,FGF9,MAN2A1,MAN1A2,PPP3R1,HSD11B1,EXT1,PGR,HS6ST1,SMPD3,RBPJ,EPAS1,CEBPA,CLCN2,FOXP1,RBP4,PTK7,SRF,NCOR2,GLI3,ASCL1,TNS3,SPRY2,RSPO2,HOPX,EGFR,ADAMTSL2,STK40,CIC,WNT7B,YAP1,SOX9,NOTCH1,CRH
GO:BP	positive regulation of protein localization to membrane	GO:1905477	1.5e-05	4.82301	111	1390	23	27543	DLG4,CACNB3,NRXN1,DPP10,AKT2,MYO5A,PTN,RAMP3,PPP1R9B,CACNG2,CDK5R1,KCNJ11,LRP4,ZDHHC2,MTCL1,LRP1,AKAP5,DLG1,ACSL3,PDPK1,STAC3,EGFR,ANK3
GO:BP	long-term synaptic depression	GO:0060292	1.62e-05	4.79152	35	1390	13	27543	MGLL,SLC24A2,ARC,ADORA1,ABHD6,PPP1R9A,SHANK3,STXBP1,SORCS3,SRF,STAU2,SHANK2,DGKI
GO:BP	metencephalon development	GO:0022037	1.68e-05	4.77431	130	1390	25	27543	WHRN,KCNC1,ATP2B2,RORA,NRXN1,CDK5R2,ZBTB18,SPTBN2,GRIN1,ZFP365,CKB,DAB1,CDK5R1,CACNA1A,MYH10,MTPN,B4GALT2,HERC1,ASCL1,NFIX,IGF1R,PTPRS,AGTPBP1,SEZ6L,NAV2
GO:BP	negative regulation of programmed cell death	GO:0043069	1.81e-05	4.74202	1053	1390	97	27543	SMAD3,SLC39A10,WNT4,WNT9A,WFS1,CCNG1,BOK,ADORA1,TYRO3,ARHGAP10,LIFR,GRIA4,ERBB4,AKT2,GABRB2,DUSP1,MPL,TFRC,TMEM132A,HSPA1B,MYO18A,LRRK2,PRKCZ,MERTK,PTK2,GRIN1,STXBP1,FZD3,PTPRZ1,SYNGAP1,PRKCA,PGR,PIN1,TLE1,CXCL12,AGAP2,PPARD,ARRB1,SRC,HIPK3,CPEB4,PRKCE,NTRK2,RB1CC1,PTGS2,CACNA1A,SCX,PIM1,HTT,FOXP1,ITGAV,OXR1,TMEM14A,FZD9,FNIP1,GLI3,MAPK8IP1,ASCL1,RPS6KA3,VHL,RNF144B,AXL,IGF1R,STRADB,SOCS3,KITL,CD…
GO:BP	regulation of supramolecular fiber organization	GO:1902903	1.91e-05	4.71874	385	1390	48	27543	MAP6D1,GIT1,SMAD3,WNT4,PAK1,CYFIP2,S1PR1,FMN1,PPP1R9A,MYLK3,SHANK1,SPTBN2,MAP1A,HSPA1B,DMTN,SHANK3,SPTB,ARHGEF10L,FERMT2,CTNNA2,NAV3,BAIAP2,TPM1,SWAP70,CIT,APC,PRKCE,PSRC1,SH3BP1,CORO2B,DLG1,MTPN,GAS2L1,WASF1,ARHGAP35,ARHGEF2,ROCK2,PIK3R2,TRIM54,CAMSAP1,MEF2C,TWF2,BRK1,ADD2,SLIT2,ESAM,RGCC,RHPN1
GO:BP	respiratory system development	GO:0060541	2.01e-05	4.69716	256	1390	37	27543	FBXW7,HEG1,FGF9,MAN2A1,MAN1A2,PPP3R1,HSD11B1,EXT1,FGFRL1,PGR,HS6ST1,SMPD3,RBPJ,EPAS1,CEBPA,CLCN2,FOXP1,RBP4,PTK7,SRF,NCOR2,GLI3,ASCL1,TNS3,SPRY2,RSPO2,HOPX,EGFR,ADAMTSL2,STK40,CIC,WNT7B,ALDH1A3,YAP1,SOX9,NOTCH1,CRH
GO:BP	transcription, DNA-templated	GO:0006351	2.21e-05	4.65613	3596	1390	254	27543	SCRT1,PLCB1,NFIC,ZFPM1,SMAD3,CUX1,KCTD1,ZFP703,ATF6,NLK,PRKCB,WNT4,RASD1,BAP1,JDP2,CAMTA2,FGF9,CAMK4,WFS1,ADCY1,CUX2,ZMYND8,TRIM37,PPP3CA,SENP2,S1PR1,APLN,ZMIZ2,RORA,PKNOX2,CDK16,MAF,ERBB4,SMARCD1,DAB2IP,KCNIP3,AKT2,ZBTB18,CRY2,NR3C1,TFRC,SSBP3,ASH1L,HEY1,PPP3R1,HSPA1B,CXXC5,FOXK1,VGLL4,POU6F1,HIVEP2,ATXN7L3,SBNO1,ZBTB16,BHLHE40,TESC,ACTN4,ZMIZ1,ATMIN,FOXK2,TLE6,KLF16,WWC1,PLAGL1,HES3,LMO4,HR,PRK…
GO:BP	regulation of muscle contraction	GO:0006937	2.24e-05	4.65043	161	1390	28	27543	TNNC1,CALM1,KCNA1,MYBPC3,ATP1A1,ATP2B1,ADORA1,ADRA1B,RYR1,DOCK4,ADRA2C,HDAC4,PDE5A,ADRB1,ZDHHC21,ATP2A1,PTGS2,TMEM38A,ARHGAP42,TRPM4,DLG1,MYH7,SRF,ATP1A2,RYR2,ADRA1A,ANK2,AKAP6
GO:BP	nucleic acid-templated transcription	GO:0097659	2.26e-05	4.64517	3597	1390	254	27543	SCRT1,PLCB1,NFIC,ZFPM1,SMAD3,CUX1,KCTD1,ZFP703,ATF6,NLK,PRKCB,WNT4,RASD1,BAP1,JDP2,CAMTA2,FGF9,CAMK4,WFS1,ADCY1,CUX2,ZMYND8,TRIM37,PPP3CA,SENP2,S1PR1,APLN,ZMIZ2,RORA,PKNOX2,CDK16,MAF,ERBB4,SMARCD1,DAB2IP,KCNIP3,AKT2,ZBTB18,CRY2,NR3C1,TFRC,SSBP3,ASH1L,HEY1,PPP3R1,HSPA1B,CXXC5,FOXK1,VGLL4,POU6F1,HIVEP2,ATXN7L3,SBNO1,ZBTB16,BHLHE40,TESC,ACTN4,ZMIZ1,ATMIN,FOXK2,TLE6,KLF16,WWC1,PLAGL1,HES3,LMO4,HR,PRK…
GO:BP	heart contraction	GO:0060047	2.3e-05	4.63813	235	1390	35	27543	NOS1AP,TNNC1,CALM1,MYL4,MYBPC3,ATP1A1,APLN,ADORA1,ADRA1B,SCN1B,EXT1,HDAC4,HBEGF,PDE5A,TPM1,ADRB1,ATP2A1,RPS6KA2,EPAS1,TMEM38A,TRPM4,KCNN2,DLG1,MYH7,ATP1A2,RYR2,CACNA2D1,ADRA1A,HOPX,ANK2,EDNRB,AKAP6,ADM,EDNRA,SGCZ
GO:BP	negative regulation of apoptotic process	GO:0043066	2.44e-05	4.61176	1030	1390	95	27543	SMAD3,SLC39A10,WNT4,WNT9A,WFS1,CCNG1,BOK,ADORA1,TYRO3,ARHGAP10,LIFR,GRIA4,ERBB4,AKT2,GABRB2,DUSP1,MPL,TFRC,HSPA1B,MYO18A,LRRK2,PRKCZ,MERTK,PTK2,GRIN1,STXBP1,FZD3,PTPRZ1,SYNGAP1,PRKCA,PGR,PIN1,TLE1,CXCL12,AGAP2,PPARD,ARRB1,SRC,HIPK3,CPEB4,PRKCE,NTRK2,RB1CC1,PTGS2,CACNA1A,SCX,PIM1,HTT,FOXP1,ITGAV,OXR1,TMEM14A,FZD9,FNIP1,GLI3,MAPK8IP1,ASCL1,RPS6KA3,VHL,RNF144B,AXL,IGF1R,STRADB,SOCS3,KITL,CD44,PDPK1,…
GO:BP	biomineralization	GO:0110148	2.53e-05	4.59684	172	1390	29	27543	SMAD3,WNT4,PHOSPHO1,ATP2B2,GPM6B,ATP2B1,S1PR1,ADORA1,PTN,SMPD3,DMP1,PTGS2,TRPM4,SLC24A3,FZD9,LGR4,PPARA,ATF4,AXIN2,RSPO2,BCOR,MEF2C,FBXL15,KLF10,FAM20A,SOX9,BMP2,PTHLH,NOTCH1
GO:BP	regulation of nucleobase-containing compound metabolic process	GO:0019219	2.69e-05	4.57078	4088	1390	282	27543	SCRT1,PLCB1,NFIC,GIT1,ZFPM1,SMAD3,CUX1,KCTD1,ZFP703,ATF6,NLK,PRKCB,WNT4,RASD1,BAP1,JDP2,CAMTA2,FGF9,CAMK4,WFS1,ADCY1,CUX2,ZMYND8,TRIM37,PPP3CA,SENP2,S1PR1,RBFOX1,APLN,ZMIZ2,RORA,PKNOX2,CDK16,RBFOX3,MAF,ERBB4,SMARCD1,DAB2IP,KCNIP3,AKT2,ZBTB18,INPPL1,SPIRE1,CRY2,NR3C1,DUSP1,TFRC,SSBP3,ASH1L,HEY1,PPP3R1,HSPA1B,UBQLN4,CXXC5,FOXK1,ADARB1,VGLL4,POU6F1,HIVEP2,ATXN7L3,SBNO1,ZBTB16,BHLHE40,TESC,ACTN4,ZMIZ…
GO:BP	regulation of actin cytoskeleton organization	GO:0032956	2.79e-05	4.55493	365	1390	46	27543	SMAD3,WNT4,PAK1,GPM6B,CYFIP2,S1PR1,FMN1,PPP1R9A,MYLK3,SHANK1,SPTBN2,DMTN,EFNA5,SHANK3,SPTB,ARHGEF10L,FAM107A,FERMT2,CTNNA2,BAIAP2,TPM1,SWAP70,CIT,CDK5R1,PRKCE,SH3BP1,CORO2B,DLG1,MTPN,WASF1,ARHGAP35,NTRK3,STAU2,ROCK2,PIK3R2,MEF2C,TWF2,FSCN1,FZD10,BRK1,ADD2,ARHGEF19,SLIT2,ESAM,RGCC,RHPN1
GO:BP	biomineral tissue development	GO:0031214	2.96e-05	4.52847	163	1390	28	27543	SMAD3,WNT4,PHOSPHO1,ATP2B2,GPM6B,ATP2B1,S1PR1,PTN,SMPD3,DMP1,PTGS2,TRPM4,SLC24A3,FZD9,LGR4,PPARA,ATF4,AXIN2,RSPO2,BCOR,MEF2C,FBXL15,KLF10,FAM20A,SOX9,BMP2,PTHLH,NOTCH1
GO:BP	regulation of RNA metabolic process	GO:0051252	3.19e-05	4.49617	3783	1390	264	27543	SCRT1,PLCB1,NFIC,ZFPM1,SMAD3,CUX1,KCTD1,ZFP703,ATF6,NLK,PRKCB,WNT4,RASD1,BAP1,JDP2,CAMTA2,FGF9,CAMK4,WFS1,ADCY1,CUX2,ZMYND8,TRIM37,PPP3CA,SENP2,S1PR1,RBFOX1,APLN,ZMIZ2,RORA,PKNOX2,CDK16,RBFOX3,MAF,ERBB4,SMARCD1,DAB2IP,KCNIP3,AKT2,ZBTB18,CRY2,NR3C1,TFRC,SSBP3,ASH1L,HEY1,PPP3R1,HSPA1B,CXXC5,FOXK1,ADARB1,VGLL4,POU6F1,HIVEP2,ATXN7L3,SBNO1,ZBTB16,BHLHE40,TESC,ACTN4,ZMIZ1,ATMIN,FOXK2,TLE6,KLF16,WWC1,PL…
GO:BP	organelle localization	GO:0051640	3.43e-05	4.46497	546	1390	60	27543	TTL,CALM1,MEI1,KIF5C,SYNDIG1,NRXN1,MYO5C,SYNE1,CPLX2,STX1B,MYO5A,SPIRE1,MYRIP,INCENP,SYT1,RASGRP1,ACTN4,LRRK2,TLE6,PRKCZ,PTK2,SUN1,MYO1E,STXBP1,PPFIA3,DAB1,TACC1,SMPD3,STARD3,PCLO,ATP2A1,TRAK1,PSRC1,IL4RA,UNC13A,MAGI2,NEFH,MYH10,HTT,DLG1,CDC42BPA,WASF1,SUN2,UNC13B,KIF1C,ARHGEF2,PDPK1,MYO1B,SPRY2,RAB3C,WIPI1,ESYT1,CENPA,TANC2,AGTPBP1,CEP83,DYNC1H1,SEC16B,SYK,MYH9
GO:BP	RNA biosynthetic process	GO:0032774	3.47e-05	4.46029	3614	1390	254	27543	SCRT1,PLCB1,NFIC,ZFPM1,SMAD3,CUX1,KCTD1,ZFP703,ATF6,NLK,PRKCB,WNT4,RASD1,BAP1,JDP2,CAMTA2,FGF9,CAMK4,WFS1,ADCY1,CUX2,ZMYND8,TRIM37,PPP3CA,SENP2,S1PR1,APLN,ZMIZ2,RORA,PKNOX2,CDK16,MAF,ERBB4,SMARCD1,DAB2IP,KCNIP3,AKT2,ZBTB18,CRY2,NR3C1,TFRC,SSBP3,ASH1L,HEY1,PPP3R1,HSPA1B,CXXC5,FOXK1,VGLL4,POU6F1,HIVEP2,ATXN7L3,SBNO1,ZBTB16,BHLHE40,TESC,ACTN4,ZMIZ1,ATMIN,FOXK2,TLE6,KLF16,WWC1,PLAGL1,HES3,LMO4,HR,PRK…
GO:BP	macromolecule biosynthetic process	GO:0009059	4.58e-05	4.33902	4797	1390	321	27543	MAP6D1,SCRT1,PLCB1,NFIC,ZFPM1,SMAD3,CUX1,KCTD1,ZFP703,ATF6,NLK,PRKCB,WNT4,RASD1,BAP1,JDP2,CAMTA2,FGF9,DPY19L1,CAMK4,WFS1,ADCY1,CUX2,ZMYND8,TRIM37,PPP3CA,MAN1C1,SENP2,ST3GAL5,S1PR1,ZDHHC8,APLN,GALNT18,ZMIZ2,RORA,MAN2A1,PKNOX2,CDK16,ALOX12B,GCNT4,MAF,ERBB4,FUT9,SMARCD1,DAB2IP,KCNIP3,AKT2,ZBTB18,MAN1A2,CRY2,NR3C1,DUSP1,TFRC,SSBP3,ASH1L,HEY1,PPP3R1,HSPA1B,CXXC5,FOXK1,HS6ST3,VGLL4,GOLGA7B,SLC25A37,POU…
GO:BP	skeletal system development	GO:0001501	4.87e-05	4.31288	538	1390	59	27543	FBXW7,ZFPM1,SMAD3,ETL4,WNT9A,PHOSPHO1,FGF9,FMN1,MAF,INPPL1,ASH1L,RASSF2,DLX1AS,RYR1,EXT1,ZBTB16,FGFRL1,HDAC4,ANKRD11,SMPD3,FRZB,SRC,DHRS3,CSRNP1,MEF2D,ZBTB7A,MAPK14,ESRRA,SCX,FOXP1,DLG1,ENG,RBP4,SRF,GLI3,SLC39A14,HSD17B7,CD44,SOX5,SOX6,PLXNB1,AXIN2,RSPO2,BMP1,MEF2C,MED1,ITGB8,WNT7B,ARID5A,MAPK11,THPO,SCHIP1,SOX9,BCAN,BMP2,INSIG1,PTHLH,BARX2,EDNRA
GO:BP	epithelial cell development	GO:0002064	5.62e-05	4.25033	232	1390	34	27543	PLCB1,HEG1,EXPH5,RILPL1,CCDC88C,MYO1E,PGR,ZDHHC21,PLEC,SHROOM3,SRC,MAGI2,PODXL,NOTCH4,FASN,PDPK1,ROCK2,ATF4,EDNRB,PTPRS,DACT2,SOX18,YAP1,FRMD6,SOX9,ROBO4,CDSN,SMARCA4,RFX3,COL15A1,NOTCH1,HPSE,EDNRA,FOSL2
GO:BP	response to hypoxia	GO:0001666	5.79e-05	4.23708	325	1390	42	27543	SMAD3,ITPR1,ADORA1,RORA,VASN,MPL,TFRC,RYR1,ACTN4,CPEB2,FOXO3,PIN1,DIO3,CXCL12,PYGM,PPARD,SRC,PPARG,RBPJ,PRKCE,EPAS1,PTGS2,EGR1,KCNK2,OPRD1,ENG,ACVRL1,SRF,VHL,RYR2,PDLIM1,PPARA,ITPR2,ALAS2,KCNK3,ADM,BMP2,RGCC,NOTCH1,EDNRA,ADAM8,FOSL2
GO:BP	cerebellum development	GO:0021549	6.03e-05	4.21945	119	1390	23	27543	WHRN,KCNC1,ATP2B2,RORA,NRXN1,CDK5R2,ZBTB18,SPTBN2,ZFP365,CKB,DAB1,CDK5R1,CACNA1A,MYH10,MTPN,B4GALT2,HERC1,NFIX,IGF1R,PTPRS,AGTPBP1,SEZ6L,NAV2
GO:BP	response to alkaloid	GO:0043279	6.03e-05	4.21945	119	1390	23	27543	GRM2,DLG4,SLC6A1,SLC1A3,RYR1,HOMER1,SLC1A2,PPP1R9B,GRIN1,CNR1,HOMER2,PGR,PPARG,PRKCE,PPP1R1B,TMEM38A,SDK1,RYR2,HTR1B,DRD4,BDNF,EDNRA,CRH
GO:BP	intracellular receptor signaling pathway	GO:0030522	6.12e-05	4.21303	244	1390	35	27543	STARD10,SEC14L1,PAK1,RORA,CRY2,NR3C1,HSPA1B,ACTN4,ZMIZ1,ESRRG,PGR,NR1D1,ESRRB,PPARD,SRC,PPARG,DHRS3,NTRK2,NR2F6,ZBTB7A,ESRRA,PIM1,FOXP1,NCOR2,PER1,SNW1,PPARA,MED1,PRCP,NR1D2,ALDH1A3,YAP1,BMP2,BDNF,SMARCA4
GO:BP	vascular process in circulatory system	GO:0003018	6.33e-05	4.19856	222	1390	33	27543	MGLL,ATP2B1,APLN,ADORA1,MYLK3,ADRA1B,EXT1,PTK2,DOCK4,FERMT2,ADRA2C,PDE5A,ADRB1,ZDHHC21,PLEC,SMPD3,PPARD,RAP1GDS1,PTGS2,ARHGAP42,TRPM4,PTPRJ,ATP1A2,ARHGAP35,HTR1B,ADRA1A,EGFR,EDNRB,ADM,SLIT2,C2CD4B,ABCC8,EDNRA
GO:BP	response to peptide	GO:1901652	6.54e-05	4.18412	516	1390	57	27543	PLCB1,PRKCB,ATP2B1,SORT1,AKT2,MYO5A,INPPL1,CRY2,RAMP3,PPP1R9B,PRKCZ,PIP4K2C,PTK2,CPEB2,FOXO3,APC,EGR2,SMPD3,CXCL12,ATP2A1,SRC,ACVR1C,MAPK14,PTGS2,ESRRA,ZBTB7B,CACNA1A,EGR1,MAS1,RAB31,CYP11A1,RBP4,SLC39A14,GPT,IGF1R,SOCS3,PCSK9,TRIM72,SORL1,ARHGEF2,PDPK1,GPAM,OSBPL8,CACNA2D1,AKT3,PPARA,PIK3R2,CACNB1,EDNRB,SMARCC1,PTPRF,ADM,ABCC8,INSIG1,NOTCH1,EDNRA,GPR21
GO:BP	negative regulation of catalytic activity	GO:0043086	6.57e-05	4.1826	776	1390	76	27543	ARPP19,DGKZ,HEG1,WNT9A,DUSP7,LMTK2,PHACTR1,SORT1,DAB2IP,AKT2,INPPL1,PTN,PPP1R37,CRY2,DUSP1,ADARB1,TESC,LRRK2,PPP1R9B,PRKAR1B,PRKCZ,PIP4K2C,PTPRT,SRCIN1,CPEB2,PTPRB,CNR1,WFDC18,CIT,APC,PLEC,SERPINI1,ARRB1,SRC,PHACTR3,PPARG,HIPK3,TRIB1,PKIG,PPP1R1B,ZFYVE28,PTGS2,DUSP3,MGAT5,AKAP5,MLLT1,ENG,PTPRJ,FNIP1,MAPK8IP1,RPS6KA3,SLC39A14,TIMP4,SPRED1,CD44,SORL1,PDPK1,ROCK2,SPRY2,SLC4A1,DGKI,PPP1R1A,AKAP6,MPRI…
GO:BP	regulation of cell-cell adhesion	GO:0022407	6.57e-05	4.18253	451	1390	52	27543	ZFP703,CD6,WNT4,CHST2,PPP3CA,LRRC32,FUT9,TFRC,DMTN,EFNA5,RASGRP1,ZBTB16,ZMIZ1,SIRPA,PRKCZ,PTK2,FCHO1,IL12A,PDE5A,PRKCA,FOXO3,SWAP70,ZDHHC21,CXCL12,SRC,ITGAL,CELSR2,IL4RA,ZDHHC2,MAPK14,DUSP3,ZBTB7B,MAGI2,DLG1,PODXL,ZBTB1,NOTCH4,GLI3,CD44,GPAM,PPARA,SLC4A1,GCNT2,ANK3,ST3GAL4,DUSP22,BMP2,CDSN,RGCC,SYK,NOTCH1,ADAM8
GO:BP	regulation of protein serine/threonine kinase activity	GO:0071900	6.61e-05	4.17986	363	1390	45	27543	HEG1,DUSP7,PAK1,CCNG1,NRXN1,CDK5R2,DAB2IP,INPPL1,INCENP,DUSP1,RASGRP1,LRRK2,ADAM9,PRKAR1B,FERMT2,PDE5A,APC,SRC,CDK5R1,HIPK3,TRIB1,PKIG,PSRC1,PIM1,HTT,PTPRJ,MAPK8IP1,NTRK3,MAP3K10,KITL,SORL1,SPRY2,SLC8A2,DVL3,MEF2C,EGFR,AKAP6,FZD10,FAM20A,CCNI,DRD4,BMP2,RGCC,SYK,ADAM8
GO:BP	protein kinase B signaling	GO:0043491	7.07e-05	4.15046	212	1390	32	27543	GRM2,LINGO1,TYRO3,NRXN1,AKT2,OTUD3,RAMP3,MERTK,PTK2,FERMT2,HBEGF,SMPD3,CXCL12,SRC,NTRK2,TSPYL5,MAGI2,DLG1,ENG,PTPRJ,DDIT3,NTRK3,AXL,OSBPL8,SPRY2,PPARA,EGFR,GCNT2,THPO,SOX9,HPSE,ADAM8
GO:BP	regeneration	GO:0031099	7.08e-05	4.15022	223	1390	33	27543	PTPN3,ITPR1,RTN4R,LIFR,ERBB4,PTN,PTGFRN,RTN4RL1,CTNNA2,UPF2,CXCL12,PPARD,PPARG,NREP,NEFH,MTPN,MYOD1,FZD9,GLI3,NTRK3,AXL,IGF1R,RTN4RL2,HOPX,EGFR,MED1,PTPRS,PTPRF,ADM,YAP1,BDNF,HGF,NOTCH1
GO:BP	calcium ion transmembrane import into cytosol	GO:0097553	7.2e-05	4.14238	180	1390	29	27543	GRIN2A,CALM1,SLC24A2,CACNA1I,ITPR1,CACNB3,MYO5A,JSRP1,RAMP3,JPH3,RYR1,GRIN1,ADRB1,PRKCE,TMEM38A,AKAP5,HTT,ITGAV,DDIT3,RYR2,PDPK1,CACNA2D1,SLC8A2,ADRA1A,GRIN2C,ANK2,AKAP6,ITPR2,EDNRA
GO:BP	protein catabolic process	GO:0030163	7.73e-05	4.11174	981	1390	90	27543	FBXW7,SMAD3,PTPN3,KCTD17,GRIN2A,BAP1,WFS1,DLGAP1,FBXL16,DAB2IP,PACSIN3,MAP1A,RNF144A,HSPA1B,UBQLN4,ZNRF1,VGLL4,ABHD17A,FBXO31,EXT1,LRRK2,ADAM9,UBE3B,KCTD6,BRSK2,PTK2,SGTB,HECW1,UBE2G1,MAPK9,MIB1,1700016K19RIK,NR1D1,PIN1,APC,AGAP2,ARRB1,CLEC16A,RNF165,USP2,TRIB1,SDF2L1,NFE2L1,FBXO33,GIPC1,ZDHHC2,HECW2,TBL1XR1,USP31,LRP1,HACE1,HERC2,NKD1,TTC3,RMND5A,RNF166,USP32,DDIT3,TIMP4,VHL,RNF144B,DDI2,PCSK9,T…
GO:BP	negative regulation of Wnt signaling pathway	GO:0030178	7.9e-05	4.1023	160	1390	27	27543	NLK,FGF9,DKKL1,DAB2IP,CCDC88C,VGLL4,TLE6,DACT3,FOXO3,APC,TLE1,FRZB,LRP4,MAPK14,EGR1,NKD1,GLI3,DDIT3,TLE3,TMEM170B,AXIN2,CTHRC1,WWTR1,SOX9,BMP2,NOTCH1,ALPK2
GO:BP	negative regulation of growth	GO:0045926	8.04e-05	4.09495	258	1390	36	27543	SMAD3,RTN4R,FSTL4,DAB2IP,HSPA1B,VGLL4,PPP1R9B,DACT3,WWC1,PTK2,DCBLD2,ADRB1,DIP2B,FRZB,PPARD,PPARG,CDK5R1,PSRC1,KCNK2,FOXP1,SMARCA2,NKD1,GAS2L1,PTPRJ,RBP4,ACVRL1,CGRRF1,SERTAD1,PPARA,CDHR2,PTPRS,MAPK11,SEMA3G,SLIT2,SMARCA4,INHBA
GO:BP	cardiac muscle contraction	GO:0060048	8.94e-05	4.04879	131	1390	24	27543	TNNC1,CALM1,MYL4,MYBPC3,ATP1A1,ADORA1,ADRA1B,SCN1B,HDAC4,PDE5A,TPM1,ADRB1,ATP2A1,TMEM38A,TRPM4,KCNN2,DLG1,MYH7,ATP1A2,RYR2,CACNA2D1,ADRA1A,ANK2,AKAP6
GO:BP	positive regulation of calcium ion transport	GO:0051928	9.22e-05	4.03526	141	1390	25	27543	CALM1,ATP2B2,TRPC6,WFS1,ITPR1,ATP2B1,CACNB3,RAMP3,HOMER1,GRIN1,CACNB4,ADRB1,CXCL12,ATP2A1,STIM2,AKAP5,HTT,RYR2,PDPK1,CACNA2D1,STAC3,ANK2,AKAP6,EDNRA,CRH
GO:BP	maintenance of location	GO:0051235	9.45e-05	4.02448	355	1390	44	27543	NBL1,CALM1,ITPR1,SLC25A23,SLC30A4,SYNE1,MYO5A,CRY2,JSRP1,CDS1,JPH3,RYR1,SUN1,TTC39B,GRIK5,ATP2A1,PPARD,STARD4,PPARG,PRKCE,ACVR1C,TMEM38A,HTT,ITGAV,IGSF11,SUN2,B4GALNT1,DDIT3,RYR2,SREBF2,SORL1,PDPK1,OSBPL8,PPARA,ANK2,TWF2,AKAP6,ITPR2,MPRIP,ANK3,NRIP1,INSIG1,CCDC22,EDNRA
GO:BP	bone mineralization	GO:0030282	9.82e-05	4.00786	122	1390	23	27543	SMAD3,WNT4,PHOSPHO1,GPM6B,ATP2B1,S1PR1,PTN,SMPD3,PTGS2,TRPM4,SLC24A3,FZD9,LGR4,ATF4,AXIN2,RSPO2,BCOR,MEF2C,FBXL15,KLF10,SOX9,BMP2,PTHLH
GO:BP	regulation of dendrite morphogenesis	GO:0048814	0.000103387	3.98553	86	1390	19	27543	SIPA1L1,TRPC6,CUX2,PPP3CA,PTPRD,FBXO31,GRIN1,HECW1,PTPRZ1,TBC1D24,BAIAP2,RELN,HECW2,AKAP5,CDKL5,NUMB,STAU2,PTPRF,LZTS1
GO:BP	heart growth	GO:0060419	0.000105182	3.97806	113	1390	22	27543	SORBS2,HEG1,FGF9,S1PR1,ERBB4,VGLL4,PIN1,ADRB1,RBPJ,MAPK14,DUSP6,PIM1,KCNK2,FOXP1,RBP4,PPARA,ADRA1A,MEF2C,AKAP6,MAPK11,YAP1,NOTCH1
GO:BP	cardiac chamber morphogenesis	GO:0003206	0.000106602	3.97223	142	1390	25	27543	ZFPM1,LY6E,TNNC1,HEG1,FGF9,MYBPC3,FGFRL1,TPM1,RBPJ,DHRS3,ENG,RBP4,MYH7,SRF,RYR2,DVL3,MEF2C,MED1,ADAMTS1,SLIT2,BMP2,SMARCA4,FHL2,NOTCH1,EDNRA
GO:BP	cardiac muscle tissue growth	GO:0055017	0.000109159	3.96194	104	1390	21	27543	SORBS2,HEG1,FGF9,S1PR1,ERBB4,VGLL4,PIN1,ADRB1,RBPJ,MAPK14,PIM1,KCNK2,FOXP1,RBP4,PPARA,ADRA1A,MEF2C,AKAP6,MAPK11,YAP1,NOTCH1
GO:BP	inorganic cation import across plasma membrane	GO:0098659	0.000109159	3.96194	104	1390	21	27543	SLC39A10,SLC24A2,ATP1A1,SLC6A1,RAMP3,SLC12A5,KCNJ9,ATP1B2,KCNJ12,SLC9A5,KCNJ10,ADRB1,KCNJ11,TRPM4,DLG1,ATP1A2,KCNK9,SLC39A14,SLC8A2,SCNN1A,HCN2
GO:BP	inorganic ion import across plasma membrane	GO:0099587	0.000109159	3.96194	104	1390	21	27543	SLC39A10,SLC24A2,ATP1A1,SLC6A1,RAMP3,SLC12A5,KCNJ9,ATP1B2,KCNJ12,SLC9A5,KCNJ10,ADRB1,KCNJ11,TRPM4,DLG1,ATP1A2,KCNK9,SLC39A14,SLC8A2,SCNN1A,HCN2
GO:BP	glial cell differentiation	GO:0010001	0.000114007	3.94307	250	1390	35	27543	LINGO1,BOK,AKT2,PTN,CNTNAP1,GPR37L1,PPP3R1,PTPRZ1,LGI4,ZFP365,KCNJ10,NR1D1,DAB1,PLEC,EGR2,RELN,PPARG,NFE2L1,NTRK2,BACE2,GLI3,ASCL1,NFIX,NTRK3,METRN,SOX5,SOX6,ADAM22,GPR17,QK,EGFR,SOX9,BMP2,SMARCA4,NOTCH1
GO:BP	cerebral cortex development	GO:0021987	0.000115086	3.93898	123	1390	23	27543	PLCB1,PHACTR1,CDK5R2,DAB2IP,ZBTB18,ZMIZ1,PPP1R9B,SUN1,GRIN1,DAB1,TACC1,RELN,CDK5R1,TBR1,NTRK2,SUN2,GLI3,ASCL1,HTR6,EGFR,PTPRS,SLIT2,BTBD3
GO:BP	postsynaptic specialization assembly	GO:0098698	0.000120014	3.92077	28	1390	11	27543	SIPA1L1,ARHGEF9,NRXN1,PTPRD,SHANK3,RELN,NTNG2,NUMB,NTRK3,PTPRS,NPTX1
GO:BP	regulation of cellular response to stress	GO:0080135	0.000120629	3.91855	661	1390	67	27543	PLCB1,FBXW7,ATF6,WFS1,BOK,SLC25A23,RTN4R,DAB2IP,PTN,SPIRE1,GPR37L1,DUSP1,RASSF2,RTN4RL1,UBQLN4,RASGRP1,LRRK2,SIRPA,APBB1,FAM168A,MAPK9,ZFP365,TBC1D24,FOXO3,IER5,CXCL12,HIPK3,NFE2L1,IGFBP6,TNFRSF19,RB1CC1,RNF169,PTGS2,DUSP3,ZBTB7B,CORO2B,KCNK2,FOXP1,DLG1,NPAS2,OXR1,MAPK8IP1,NACC2,PER1,VHL,NTRK3,IGF1R,SPRED1,MAP3K10,CD44,FMR1,ATF4,AXIN2,EGFR,PTPRS,PTPRF,WNT7B,HIPK2,DUSP22,AQP11,EPHB1,HERPUD1,BMP2,H…
GO:BP	response to decreased oxygen levels	GO:0036293	0.000121069	3.91697	358	1390	44	27543	SMAD3,ITPR1,ADORA1,RORA,VASN,MPL,TFRC,RYR1,ACTN4,CPEB2,FOXO3,PIN1,DIO3,CXCL12,PYGM,PPARD,SRC,PPARG,RBPJ,CPEB4,PRKCE,EPAS1,PTGS2,EGR1,KCNK2,OPRD1,ENG,ACVRL1,SRF,VHL,RYR2,PDLIM1,PPARA,ATF4,ITPR2,ALAS2,KCNK3,ADM,BMP2,RGCC,NOTCH1,EDNRA,ADAM8,FOSL2
GO:BP	regulation of cell morphogenesis involved in differentiation	GO:0010769	0.000124182	3.90594	114	1390	22	27543	CUX2,MPL,PTPRD,DMTN,EFNA5,FBXO31,ACTN4,PTK2,FERMT2,MAPK9,TBC1D24,BAIAP2,RELN,PREX1,AKAP5,CDKL5,NUMB,STAU2,TRIOBP,PTPRF,RCC2,HPSE
GO:BP	connective tissue development	GO:0061448	0.000127195	3.89553	286	1390	38	27543	SMAD3,WNT9A,FGF9,MAF,EXT1,ZBTB16,RASAL2,SMPD3,FRZB,PPARD,MEF2D,ZBTB7A,MAPK14,ESRRA,TBL1XR1,SCX,TRPM4,EGR1,SRF,GLI3,SLC39A14,CD44,SORL1,SOX5,PPARGC1A,SOX6,AXIN2,RSPO2,BMP1,MEF2C,ITGB8,WNT7B,ARID5A,SOX9,BMP2,PTHLH,NOTCH1,BARX2
GO:BP	cellular lipid metabolic process	GO:0044255	0.000132379	3.87818	1037	1390	93	27543	MGLL,PLCB1,DGKZ,TTC7B,DIO2,ETNK2,PIP5K1C,ABHD6,ABCD2,ALOX12B,ERBB4,FUT9,LPCAT4,PIP5K1B,AKT2,MYO5A,INPPL1,LPGAT1,DAGLB,CDS1,E030003E18RIK,PLCH2,LCAT,THRSP,PI4KA,ACSL6,AGPAT3,PIGZ,PIP4K2C,TTC7,MAPK9,SLC35C1,CNR1,ACSS2,SMPD3,NEU1,INPP4A,PPARD,STARD4,PPARG,TUBA8,NFE2L1,DHRS3,CYP4F14,ST3GAL2,ABHD2,ABHD8,MAPK14,PTGS2,TBL1XR1,GAL3ST3,PGS1,FAM126B,ST8SIA5,RBP4,ACSL3,CROT,FASN,DGAT2L6,CERK,B4GALNT1,LIPG,E…
GO:BP	regulation of heart contraction	GO:0008016	0.000137745	3.86092	196	1390	30	27543	NOS1AP,CALM1,MYL4,ATP1A1,APLN,ADORA1,ADRA1B,SCN1B,HDAC4,HBEGF,PDE5A,TPM1,ADRB1,ATP2A1,EPAS1,TMEM38A,TRPM4,KCNN2,DLG1,MYH7,ATP1A2,RYR2,CACNA2D1,ADRA1A,HOPX,ANK2,EDNRB,AKAP6,ADM,EDNRA
GO:BP	epithelial tube morphogenesis	GO:0060562	0.000142515	3.84614	360	1390	44	27543	SMAD3,WNT4,PAK1,PLXND1,FMN1,LUZP1,PPP3R1,SHANK3,EXT1,LMO4,FZD3,MIB1,MICAL2,PGR,CXCL12,SHROOM3,SRC,RBPJ,FOXP1,DLG1,PODXL,ENG,ACVRL1,PTK7,NOTCH4,SRF,GLI3,ARHGAP35,RYR2,LGR4,CSMD1,SPRY2,RSPO2,DVL3,CTHRC1,MEF2C,MED1,ADM,SLIT2,YAP1,SOX9,BMP2,NOTCH1,EDNRA
GO:BP	in utero embryonic development	GO:0001701	0.000148265	3.82896	515	1390	56	27543	ADCY9,LY6E,SMAD3,ETNK2,HEG1,BAP1,SENP2,MAN2A1,SLC35E2,ZBTB18,SPECC1,ZMIZ1,CDK2AP1,HES3,MYO1E,HBEGF,APBA2,MIB1,ANKRD11,TPM1,HS6ST1,ESRRB,RBPJ,ACVR1C,EPAS1,CEBPA,TBL1XR1,PLCD3,MYH10,FOXP1,ITGAV,ACVRL1,SRF,NCOR2,GLI3,MBNL1,SOCS3,SOX5,SOX6,HOPX,BCOR,EGFR,MED1,WNT7B,BRK1,SOX18,TANC2,ADM,SLIT2,YAP1,BMP2,BIRC6,SMARCA4,NOTCH1,MYH9,EDNRA
GO:BP	cell-cell adhesion via plasma-membrane adhesion molecules	GO:0098742	0.000165165	3.78208	277	1390	37	27543	CD6,NRXN1,PTPRD,CLSTN1,EFNA5,NPTN,PCDHAC1,PTPRT,NRCAM,FGFRL1,LRRC4C,DAB1,IGSF9B,ITGAL,FAT3,CDH12,CELSR2,MAPK14,NTNG2,MAGI2,IGSF11,CDH22,SDK1,SLITRK1,CDH11,SDK2,PCDH1,HMCN1,CDHR2,PCDHAC2,PTPRS,PTPRF,ARVCF,AMIGO1,ESAM,DSCAM,BMP2
GO:BP	mesenchymal cell differentiation	GO:0048762	0.000167766	3.7753	231	1390	33	27543	SMAD3,ZFP703,OLFM1,WNT4,ERBB4,DAB2IP,VASN,PPP3R1,EXT1,DACT3,FERMT2,TCOF1,FRZB,RBPJ,WNT10A,ENG,NOTCH4,LRG1,SPRED1,KITL,SPRY2,AXIN2,MEF2C,EDNRB,GCNT2,WWTR1,SEMA3G,NRTN,SOX9,BMP2,RGCC,NOTCH1,EDNRA
GO:BP	response to inorganic substance	GO:0010035	0.000168929	3.7723	653	1390	66	27543	PLCB1,TNNC1,GRIN2A,KCNC1,CALM1,SLC13A5,KCNA1,TRPC6,BAP1,DLG4,ADCY1,PPP3CA,ADORA1,SLC25A23,SLC30A4,NRXN1,SLC6A1,KCNIP3,SLC1A3,GPR37L1,TFRC,KCNH1,DMTN,SYT1,RYR1,HOMER1,LRRK2,LCAT,SYT12,ADAM9,SIRPA,NET1,KCNQ3,CACNG2,MAPK9,FOXO3,PLEC,SMPD3,ACTA1,HCN1,SRC,NFE2L1,SYT13,PTGS2,CEBPA,NEFH,FOXP1,ITGAV,CYP11A1,ASCL1,RYR2,AXL,DDI2,ATF4,SLC4A1,MEF2C,EGFR,EDNRB,ANXA11,ANK3,KCNK3,NPTX1,SIGMAR1,ABCC8,HGF,EDNRA
GO:BP	regulation of gene expression	GO:0010468	0.000170731	3.76769	5415	1390	352	27543	SCRT1,PLCB1,FBXW7,NFIC,GIT1,WHRN,ZFPM1,CCDC3,SMAD3,CUX1,KCTD1,ZNFX1,ZFP703,ATF6,NLK,CD6,PRKCB,OLFM1,WNT4,HEG1,RASD1,BAP1,JDP2,CAMTA2,FGF9,CAMK4,WFS1,ADCY1,CUX2,ZMYND8,TRIM37,PPP3CA,SENP2,ATP2B1,S1PR1,RBFOX1,APLN,ZMIZ2,RORA,NRXN1,LRRC32,PKNOX2,CDK16,ALOX12B,RBFOX3,SORT1,MAF,ERBB4,SMARCD1,DAB2IP,STX1B,KCNIP3,AKT2,ZBTB18,INPPL1,CRY2,NR3C1,MPL,TFRC,SSBP3,ASH1L,HEY1,PPP3R1,HSPA1B,CXXC5,FOXK1,VGLL4,RAS…
GO:BP	aromatic compound biosynthetic process	GO:0019438	0.000186249	3.72991	4050	1390	275	27543	SCRT1,ADCY9,PLCB1,NFIC,ZFPM1,SMAD3,CUX1,KCTD1,ZFP703,ATF6,NLK,PRKCB,WNT4,RASD1,BAP1,JDP2,CAMTA2,FGF9,CAMK4,WFS1,ADCY1,CUX2,ZMYND8,TRIM37,PPP3CA,SENP2,S1PR1,APLN,GUCY2G,ZMIZ2,RORA,PKNOX2,CDK16,MAF,ERBB4,SMARCD1,DAB2IP,KCNIP3,AKT2,MYO5A,ZBTB18,CRY2,NR3C1,DUSP1,TFRC,SSBP3,ASH1L,HEY1,PPP3R1,HSPA1B,CXXC5,FOXK1,VGLL4,POU6F1,HIVEP2,ATXN7L3,SBNO1,ZBTB16,BHLHE40,TESC,ACTN4,ZMIZ1,ATMIN,PARM1,FOXK2,TLE6,KLF…
GO:BP	neuromuscular process controlling balance	GO:0050885	0.000189905	3.72146	64	1390	16	27543	ATP2B2,DLG4,RBFOX1,NRXN1,CNTNAP1,SHANK1,SLC1A3,JPH3,SHANK3,JPH4,PDE8B,CACNA1A,MYH10,HERC1,GRIN2C,ALDH1A3
GO:BP	organ growth	GO:0035265	0.000194832	3.71034	199	1390	30	27543	LY6E,SORBS2,HEG1,FGF9,S1PR1,ERBB4,VGLL4,EXT1,WWC1,PTK2,PIN1,ADRB1,SMPD3,RBPJ,MAPK14,DUSP6,PIM1,KCNK2,FOXP1,RBP4,SPRY2,PPARA,RSPO2,ADRA1A,MEF2C,AKAP6,MAPK11,YAP1,SOX9,NOTCH1
GO:BP	regulation of dendritic spine development	GO:0060998	0.000211968	3.67373	81	1390	18	27543	ASAP1,MAPK6,CUX2,ZMYND8,PPP1R9A,FSTL4,SHANK1,SHANK3,BAIAP2,RELN,CDKL5,SDK1,STAU2,FMR1,MEF2C,PTPRS,TANC2,NEURL1A
GO:BP	glucose homeostasis	GO:0042593	0.000220588	3.65642	304	1390	39	27543	HKDC1,WFS1,PPP3CA,CDK16,CRY2,FOXK1,EFNA5,FOXK2,BRSK2,GRIK5,CNR1,FOXO3,NR1D1,PDE8B,PPARD,ARRB1,STXBP5L,KCNJ11,PRKCE,BACE2,CEBPA,CACNA1A,TRPM4,RBP4,SRF,NCOR2,UNC13B,SLC39A14,IGF1R,CSMD1,PIK3R2,AQP4,CYB5R4,PRCP,NPTX1,ABCC8,SMARCA4,CRH,GPR21
GO:BP	positive regulation of growth	GO:0045927	0.000220588	3.65642	304	1390	39	27543	PLCB1,CPNE9,SYT2,FGF9,WFS1,RIMS1,ERBB4,EFNA5,SYT1,PTK2,HBEGF,PIN1,ADRB1,DIO3,CXCL12,PPARD,RBPJ,MAPK14,UNC13A,PIM1,CDKL5,DLG1,MTPN,EXTL3,MYOD1,SRF,NTRK3,GPAM,HOPX,MEF2C,EGFR,TWF2,AKAP6,TNFRSF12A,YAP1,DSCAM,BDNF,NOTCH1,GPR21
GO:BP	carbohydrate homeostasis	GO:0033500	0.000220588	3.65642	304	1390	39	27543	HKDC1,WFS1,PPP3CA,CDK16,CRY2,FOXK1,EFNA5,FOXK2,BRSK2,GRIK5,CNR1,FOXO3,NR1D1,PDE8B,PPARD,ARRB1,STXBP5L,KCNJ11,PRKCE,BACE2,CEBPA,CACNA1A,TRPM4,RBP4,SRF,NCOR2,UNC13B,SLC39A14,IGF1R,CSMD1,PIK3R2,AQP4,CYB5R4,PRCP,NPTX1,ABCC8,SMARCA4,CRH,GPR21
GO:BP	vasculogenesis	GO:0001570	0.000224301	3.64917	90	1390	19	27543	FBXW7,HEG1,FGF9,ZMIZ1,PTK2,MYO1E,NTRK2,ITGAV,ENG,SPRED1,QK,ITGB8,WNT7B,SOX18,ADM,YAP1,SMARCA4,ACKR3,NOTCH1
GO:BP	regulation of cell-substrate junction organization	GO:0150116	0.000240171	3.61948	65	1390	16	27543	SMAD3,WNT4,GPM6B,FMN1,IQSEC1,DMTN,EFNA5,FAM107A,PTK2,FERMT2,SRC,DUSP3,PTPRJ,ACVRL1,RCC2,DUSP22
GO:BP	tissue migration	GO:0090130	0.00024085	3.61825	305	1390	39	27543	FBXW7,PLXND1,DAB2IP,BMPER,IQSEC1,PTN,ADAM9,PTK2,HBEGF,PRKCA,ACTA1,PPARD,SRC,PRKCE,SH3BP1,GIPC1,PTGS2,FOXP1,ITGAV,SMOC2,ACVRL1,SRF,VHL,LRG1,SPRED1,PDPK1,ROCK2,AKT3,PIK3R2,MEF2C,PRCP,SOX18,DNAJA4,SLIT2,SOX9,RGCC,NOTCH1,MYH9,ADAM8
GO:BP	regulation of protein localization to cell periphery	GO:1904375	0.000250667	3.6009	138	1390	24	27543	IQSEC2,NRXN1,DPP10,MYO5A,RAPGEF4,RAMP3,PPP1R9B,PRKCZ,CACNG2,KCNJ11,ZDHHC2,MAGI2,LRP1,AKAP5,DLG1,NUMB,ACSL3,LYPD1,DDI2,PDPK1,PIK3R2,STAC3,EGFR,VTI1B
GO:BP	regulation of heart growth	GO:0060420	0.000258861	3.58693	82	1390	18	27543	FGF9,ERBB4,VGLL4,PIN1,ADRB1,RBPJ,MAPK14,DUSP6,PIM1,KCNK2,FOXP1,RBP4,PPARA,MEF2C,AKAP6,MAPK11,YAP1,NOTCH1
GO:BP	negative regulation of transport	GO:0051051	0.000265427	3.57606	484	1390	53	27543	PRKCB,CALM1,PLCB4,DLG4,PACSIN1,GPM6B,PPP3CA,ADORA1,CACNB3,PPP1R9A,STX1B,AKT2,MYO5A,PACSIN3,CRY2,PRRT2,DMTN,SNPH,LRRK2,SIRPA,SRCIN1,HECW1,IL12A,CNR1,PDE8B,STXBP5L,KCNJ11,USP2,PKIG,PRKCE,ANKRD13B,ACVR1C,PTGS2,HECW2,AKAP5,ITGAV,ATP1A2,SREBF2,DDI2,PCSK9,HTR1B,ATF4,HTR6,IL1RAPL1,ASIC1,KCNAB1,ANK3,RAB11FIP3,DRD4,ABCC8,INSIG1,NOTCH1,CRH
GO:BP	eye development	GO:0001654	0.000271217	3.56668	419	1390	48	27543	SMAD3,ATF6,ATP2B2,FGF9,CHRDL1,ATP2B1,MAN2A1,MAF,FJX1,PTN,E030003E18RIK,MEGF11,MERTK,DIO3,TUB,HCN1,OLFM3,FAT3,NTRK2,CLCN2,MYH10,DLG1,RBP4,ACVRL1,SDK1,SRF,GLI3,CALB1,ARHGAP35,VHL,NTRK3,STAU2,SPRED1,SPRY2,SDK2,ATF4,EGFR,MED1,NES,AGTPBP1,ALDH1A3,HIPK2,SOX9,EPHB1,DSCAM,BDNF,SMARCA4,INHBA
GO:BP	synapse maturation	GO:0060074	0.000278059	3.55586	30	1390	11	27543	CHRDL1,NRXN1,ERBB4,DAB2IP,SHANK1,CLSTN1,RELN,NFIA,BCAN,NEURL1A,SEZ6L
GO:BP	telencephalon cell migration	GO:0022029	0.000302249	3.51964	66	1390	16	27543	CDK5R2,DAB2IP,ZMIZ1,LRRK2,SUN1,DAB1,CXCL12,RELN,CDK5R1,SUN2,SRF,GLI3,NRG3,HTR6,EGFR,SLIT2
GO:BP	epithelial cell migration	GO:0010631	0.000315274	3.50131	296	1390	38	27543	FBXW7,PLXND1,DAB2IP,BMPER,IQSEC1,PTN,ADAM9,PTK2,HBEGF,PRKCA,PPARD,SRC,PRKCE,SH3BP1,GIPC1,PTGS2,FOXP1,ITGAV,SMOC2,ACVRL1,SRF,VHL,LRG1,SPRED1,PDPK1,ROCK2,AKT3,PIK3R2,MEF2C,PRCP,SOX18,DNAJA4,SLIT2,SOX9,RGCC,NOTCH1,MYH9,ADAM8
GO:BP	nucleobase-containing compound biosynthetic process	GO:0034654	0.000332456	3.47827	3971	1390	269	27543	SCRT1,ADCY9,PLCB1,NFIC,ZFPM1,SMAD3,CUX1,KCTD1,ZFP703,ATF6,NLK,PRKCB,WNT4,RASD1,BAP1,JDP2,CAMTA2,FGF9,CAMK4,WFS1,ADCY1,CUX2,ZMYND8,TRIM37,PPP3CA,SENP2,S1PR1,APLN,GUCY2G,ZMIZ2,RORA,PKNOX2,CDK16,MAF,ERBB4,SMARCD1,DAB2IP,KCNIP3,AKT2,ZBTB18,CRY2,NR3C1,DUSP1,TFRC,SSBP3,ASH1L,HEY1,PPP3R1,HSPA1B,CXXC5,FOXK1,VGLL4,POU6F1,HIVEP2,ATXN7L3,SBNO1,ZBTB16,BHLHE40,TESC,ACTN4,ZMIZ1,ATMIN,PARM1,FOXK2,TLE6,KLF16,ACS…
GO:BP	positive regulation of cell adhesion	GO:0045785	0.000333381	3.47706	461	1390	51	27543	SMAD3,CD6,WNT4,CHST2,PPP3CA,FMN1,PTN,TFRC,DMTN,RASGRP1,ZBTB16,ZMIZ1,ADAM9,SIRPA,PRKCZ,PTK2,FERMT2,FCHO1,IL12A,PRKCA,TPM1,FOXO3,CXCL12,SRC,ITGAL,PRKCE,DMP1,IL4RA,ZBTB7B,PREX1,ITGAV,SMOC2,PODXL,PTPRJ,ZBTB1,GLI3,CD44,GPAM,UTRN,PIK3R2,SLC4A1,TRIOBP,GCNT2,ANK3,FBLN2,COL26A1,ST3GAL4,VAV3,SYK,HPSE,ADAM8
GO:BP	visual system development	GO:0150063	0.000336624	3.47285	422	1390	48	27543	SMAD3,ATF6,ATP2B2,FGF9,CHRDL1,ATP2B1,MAN2A1,MAF,FJX1,PTN,E030003E18RIK,MEGF11,MERTK,DIO3,TUB,HCN1,OLFM3,FAT3,NTRK2,CLCN2,MYH10,DLG1,RBP4,ACVRL1,SDK1,SRF,GLI3,CALB1,ARHGAP35,VHL,NTRK3,STAU2,SPRED1,SPRY2,SDK2,ATF4,EGFR,MED1,NES,AGTPBP1,ALDH1A3,HIPK2,SOX9,EPHB1,DSCAM,BDNF,SMARCA4,INHBA
GO:BP	cartilage development	GO:0051216	0.000341201	3.46699	204	1390	30	27543	SMAD3,WNT9A,FGF9,MAF,EXT1,ZBTB16,SMPD3,FRZB,MEF2D,ZBTB7A,MAPK14,ESRRA,SCX,SRF,GLI3,SLC39A14,CD44,SOX5,SOX6,AXIN2,RSPO2,BMP1,MEF2C,ITGB8,WNT7B,ARID5A,SOX9,BMP2,PTHLH,BARX2
GO:BP	actomyosin structure organization	GO:0031032	0.000341201	3.46699	204	1390	30	27543	SMAD3,WNT4,PAK1,S1PR1,PHACTR1,PPP1R9A,MYLK3,MYO18A,ARHGEF10L,FERMT2,TPM1,PLEC,ACTA1,ARRB1,SRC,CORO2B,MYH10,FOXP1,CDC42BPA,SRF,FAM171A1,CSRP1,PDLIM1,ROCK2,PIK3R2,MEF2C,FRMD6,RGCC,RHPN1,MYH9
GO:BP	negative regulation of protein metabolic process	GO:0051248	0.000342112	3.46583	1119	1390	97	27543	ARPP19,SMAD3,PTPN3,GFRA2,GRIN2A,HEG1,WNT9A,DUSP7,SENP2,DAB2IP,AKT2,INPPL1,CRY2,MAP1A,DUSP1,RASSF2,HSPA1B,DMTN,CADM4,ADARB1,LRRK2,PPP1R9B,HHATL,SIRPA,PRKAR1B,PRKCZ,PTPRT,SRCIN1,CPEB2,HBEGF,PTPRB,TBC1D24,SWAP70,WFDC18,PIN1,APC,PLEC,SERPINI1,AGAP2,ARRB1,CLEC16A,SRC,HIPK3,TRIB1,PKIG,CPEB4,PRKCE,NTRK2,PPP1R1B,GIPC1,BACE2,ZFYVE28,PTGS2,DUSP3,DUSP6,MGAT5,MAS1,ITGAV,OXR1,MLLT1,ENG,PTPRJ,MLLT6,FNIP1,MAPK8…
GO:BP	central nervous system neuron differentiation	GO:0021953	0.000342418	3.46544	193	1390	29	27543	LINGO1,ATP2B2,RORA,NRXN1,ADARB1,SHANK3,SCN1B,ZMIZ1,LMO4,PTK2,TBR1,NFE2L1,PLXNA4,NTRK2,CACNA1A,MTPN,HERC1,DCLK1,GLI3,CDH11,ASCL1,NFIX,ARHGAP35,SOX5,GDPD5,AGTPBP1,SLIT2,EPHB1,INHBA
GO:BP	epithelial cell differentiation	GO:0030855	0.000361423	3.44198	723	1390	70	27543	PLCB1,WHRN,SMAD3,ZFP703,WNT4,HEG1,ATP2B2,PPP3CA,S1PR1,EXPH5,MAF,RILPL1,ERBB4,PPP3R1,CCDC88C,EXT1,FN3K,ADAM9,MYO1E,PGR,ZDHHC21,PLEC,FRZB,SHROOM3,SRC,RBPJ,NFE2L1,SH3BP1,PTGS2,SCX,MAGI2,FOXP1,PODXL,ACVRL1,PTK7,NOTCH4,NCOR2,FASN,ASCL1,VHL,NTRK3,SPRED1,PDPK1,ROCK2,SPRY2,ATF4,CDHR2,MEF2C,TRIOBP,EDNRB,MED1,CBFA2T2,PTPRS,DACT2,WWTR1,SOX18,YAP1,FRMD6,SOX9,ROBO4,BMP2,CDSN,SMARCA4,RFX3,COL15A1,NOTCH1,HPSE,E…
GO:BP	striated muscle contraction	GO:0006941	0.000368908	3.43308	172	1390	27	27543	TNNC1,CALM1,MYL4,MYBPC3,ATP1A1,ADORA1,JSRP1,ADRA1B,HOMER1,SCN1B,HDAC4,PDE5A,TPM1,ADRB1,ATP2A1,TMEM38A,TRPM4,KCNN2,DLG1,MYH7,ATP1A2,RYR2,CACNA2D1,STAC3,ADRA1A,ANK2,AKAP6
GO:BP	long-term memory	GO:0007616	0.000371417	3.43014	44	1390	13	27543	SNAP25,CAMK4,ARC,ADCY1,SHANK1,PRKCZ,GRIN1,RELN,NTRK2,TRPM4,EGR1,SRF,CALB1
GO:BP	epithelium migration	GO:0090132	0.000409917	3.3873	299	1390	38	27543	FBXW7,PLXND1,DAB2IP,BMPER,IQSEC1,PTN,ADAM9,PTK2,HBEGF,PRKCA,PPARD,SRC,PRKCE,SH3BP1,GIPC1,PTGS2,FOXP1,ITGAV,SMOC2,ACVRL1,SRF,VHL,LRG1,SPRED1,PDPK1,ROCK2,AKT3,PIK3R2,MEF2C,PRCP,SOX18,DNAJA4,SLIT2,SOX9,RGCC,NOTCH1,MYH9,ADAM8
GO:BP	regulation of long-term neuronal synaptic plasticity	GO:0048169	0.000411325	3.38582	31	1390	11	27543	GRIN2A,DLG4,SHANK3,NPTN,GRIN1,SYNGAP1,KCNJ10,EGR1,S100B,BDNF,NEURL1A
GO:BP	positive regulation of secretion	GO:0051047	0.000411589	3.38554	399	1390	46	27543	SNAP25,CACNA1I,PPP3CA,APLN,ADORA1,EXPH5,SLC6A1,ALOX12B,CDK5R2,STX1B,OLFR78,RAPGEF4,MYRIP,SYT1,MYO18A,ADAM9,APBB1,STXBP1,CACNB4,MAPK9,RAB15,CNR1,RASL10B,ADRB1,SMPD3,CXCL12,PPARD,ARRB1,PPARG,PRKCE,IL4RA,UNC13A,TRPM4,MYH10,KISS1,RBP4,ACSL3,UNC13B,HTR6,SLC4A8,EGFR,EDNRB,BMP2,RGCC,SYK,CRH
GO:BP	cell cycle	GO:0007049	0.000431161	3.36536	1767	1390	138	27543	MAPK4,ARPP19,TTL,PLCB1,FBXW7,DGKZ,GIT1,PTPN3,MAPK6,ZFP703,TUBA4A,CALM1,WNT4,BAP1,MEI1,BRINP1,WFS1,TRIM37,CCNG1,PPP3CA,SENP2,CDK16,CDK5R2,DAB2IP,BRINP2,SPIRE1,TTYH1,INCENP,DUSP1,CDK19,RASSF2,HSPA1B,CINP,ADARB1,FBXO31,CDK2AP1,FAM107A,TLE6,RAB11FIP4,BRSK2,APBB1,SUN1,FZD3,CACNB4,ZFP365,PRKCA,LSM11,MAPK12,PIN1,CIT,APC,TACC1,ESRRB,PLEC,SMPD3,SRC,CDK5R1,TUBA8,USP2,PRKCE,PSRC1,NFE2L1,TOM1L2,TTBK1,MADD,ZB…
GO:BP	regulation of cardiac muscle tissue growth	GO:0055021	0.000434615	3.3619	76	1390	17	27543	FGF9,ERBB4,VGLL4,PIN1,ADRB1,RBPJ,MAPK14,PIM1,KCNK2,FOXP1,RBP4,PPARA,MEF2C,AKAP6,MAPK11,YAP1,NOTCH1
GO:BP	odontogenesis	GO:0042476	0.000443035	3.35356	132	1390	23	27543	NFIC,MYO5A,CTNNA2,HTRA1,ANKRD11,SMPD3,SRC,DMP1,LRP4,RELT,WNT10A,GLI3,PPARA,AXIN2,RSPO2,BCOR,AQP6,WNT7B,ADM,FAM20A,BMP2,EDNRA,INHBA
GO:BP	negative regulation of canonical Wnt signaling pathway	GO:0090090	0.000443035	3.35356	132	1390	23	27543	DKKL1,DAB2IP,CCDC88C,TLE6,DACT3,FOXO3,APC,TLE1,FRZB,LRP4,MAPK14,EGR1,NKD1,GLI3,DDIT3,TLE3,TMEM170B,AXIN2,CTHRC1,WWTR1,SOX9,BMP2,NOTCH1
GO:BP	establishment of organelle localization	GO:0051656	0.000446214	3.35046	413	1390	47	27543	TTL,MEI1,KIF5C,MYO5C,SYNE1,CPLX2,MYO5A,SPIRE1,MYRIP,INCENP,RASGRP1,ACTN4,LRRK2,TLE6,PRKCZ,PTK2,SUN1,MYO1E,STXBP1,TACC1,SMPD3,STARD3,PCLO,TRAK1,PSRC1,IL4RA,NEFH,MYH10,HTT,DLG1,CDC42BPA,WASF1,SUN2,KIF1C,ARHGEF2,PDPK1,MYO1B,SPRY2,WIPI1,CENPA,TANC2,AGTPBP1,CEP83,DYNC1H1,SEC16B,SYK,MYH9
GO:BP	heterocycle biosynthetic process	GO:0018130	0.000464863	3.33268	4039	1390	272	27543	SCRT1,ADCY9,PLCB1,NFIC,ZFPM1,SMAD3,CUX1,KCTD1,ZFP703,ATF6,NLK,PRKCB,WNT4,RASD1,BAP1,JDP2,CAMTA2,FGF9,CAMK4,WFS1,ADCY1,CUX2,ZMYND8,TRIM37,PPP3CA,SENP2,S1PR1,APLN,GUCY2G,ZMIZ2,RORA,PKNOX2,CDK16,MAF,ERBB4,SMARCD1,DAB2IP,KCNIP3,AKT2,ZBTB18,CRY2,NR3C1,DUSP1,TFRC,SSBP3,ASH1L,HEY1,PPP3R1,HSPA1B,CXXC5,FOXK1,VGLL4,POU6F1,HIVEP2,ATXN7L3,SBNO1,ZBTB16,BHLHE40,TESC,ACTN4,ZMIZ1,ATMIN,PARM1,FOXK2,TLE6,KLF16,ACS…
GO:BP	calcium-ion regulated exocytosis	GO:0017156	0.000471984	3.32607	68	1390	16	27543	SNAP25,RIMS3,CACNA1I,RIMS1,CDK5R2,STX1B,RAPGEF4,SYT1,SYT12,STXBP1,SYT13,UNC13A,CACNA1A,UNC13B,NOTCH1,MYH9
GO:BP	negative regulation of cell projection organization	GO:0031345	0.00047274	3.32538	207	1390	30	27543	TRPC6,PPP3CA,RAP1GAP2,RTN4R,NRXN1,TBC1D30,FSTL4,STX1B,INPPL1,RTN4RL1,NTM,LRRK2,PTK2,PTPRZ1,ZFP365,SYNGAP1,DAB1,DIP2B,CDK5R1,FAT3,LRP4,SPRY2,RTN4RL2,CBFA2T2,PTPRS,PTPRF,SEMA3G,SLIT2,YAP1,NEU4
GO:BP	skeletal muscle organ development	GO:0060538	0.00047274	3.32538	207	1390	30	27543	PPP3CA,RBFOX1,ZBTB18,CNTNAP1,RYR1,HOMER1,PLAGL1,FGFRL1,HDAC4,PLEC,EGR2,ACTA1,USP2,MEF2D,MAPK14,SCX,EGR1,FOXP1,MYOD1,HIVEP3,MBNL1,STAC3,MEF2C,KLHL40,XK,S100B,NR1D2,EPHB1,NEURL1A,NOTCH1
GO:BP	sensory system development	GO:0048880	0.000479631	3.31909	427	1390	48	27543	SMAD3,ATF6,ATP2B2,FGF9,CHRDL1,ATP2B1,MAN2A1,MAF,FJX1,PTN,E030003E18RIK,MEGF11,MERTK,DIO3,TUB,HCN1,OLFM3,FAT3,NTRK2,CLCN2,MYH10,DLG1,RBP4,ACVRL1,SDK1,SRF,GLI3,CALB1,ARHGAP35,VHL,NTRK3,STAU2,SPRED1,SPRY2,SDK2,ATF4,EGFR,MED1,NES,AGTPBP1,ALDH1A3,HIPK2,SOX9,EPHB1,DSCAM,BDNF,SMARCA4,INHBA
GO:BP	skeletal muscle tissue development	GO:0007519	0.000479657	3.31907	196	1390	29	27543	PPP3CA,RBFOX1,ZBTB18,CNTNAP1,RYR1,HOMER1,PLAGL1,HDAC4,PLEC,EGR2,ACTA1,USP2,MEF2D,MAPK14,SCX,EGR1,FOXP1,MYOD1,HIVEP3,MBNL1,STAC3,MEF2C,KLHL40,XK,S100B,NR1D2,EPHB1,NEURL1A,NOTCH1
GO:BP	regulation of focal adhesion assembly	GO:0051893	0.000481729	3.3172	60	1390	15	27543	SMAD3,WNT4,GPM6B,FMN1,DMTN,EFNA5,FAM107A,PTK2,FERMT2,SRC,DUSP3,PTPRJ,ACVRL1,RCC2,DUSP22
GO:BP	regulation of cell-substrate junction assembly	GO:0090109	0.000481729	3.3172	60	1390	15	27543	SMAD3,WNT4,GPM6B,FMN1,DMTN,EFNA5,FAM107A,PTK2,FERMT2,SRC,DUSP3,PTPRJ,ACVRL1,RCC2,DUSP22
GO:BP	response to cocaine	GO:0042220	0.000481729	3.3172	60	1390	15	27543	GRM2,DLG4,SLC6A1,SLC1A3,HOMER1,SLC1A2,CNR1,HOMER2,PGR,PPP1R1B,SDK1,HTR1B,DRD4,BDNF,CRH
GO:BP	negative regulation of cell adhesion	GO:0007162	0.000487135	3.31235	301	1390	38	27543	ZFP703,PLXND1,LRRC32,DUSP1,DMTN,EFNA5,ACTN4,FAM107A,PTK2,PTPRZ1,PDE5A,SWAP70,DAB1,CXCL12,SRC,PLXNA4,IL4RA,DUSP3,ZBTB7B,CORO2B,DLG1,PODXL,ACVRL1,NOTCH4,GLI3,PLXNB1,PPARA,GCNT2,DACT2,RCC2,DUSP22,JAM2,DSCAM,BMP2,CDSN,RGCC,NOTCH1,ADAM8
GO:BP	carbohydrate derivative metabolic process	GO:1901135	0.000511086	3.29151	993	1390	88	27543	ADCY9,PLCB1,GIT1,HKDC1,ATP2B2,CHST2,DPY19L1,ADCY1,MAN1C1,NUDT3,ST3GAL5,GUCY2G,GALNT18,RORA,ABHD6,MAN2A1,GCNT4,FUT9,MAN1A2,FOXK1,HSD11B1,HS6ST3,E030003E18RIK,EXT1,LRRK2,FOXK2,FN3K,ACSL6,PIGZ,HDAC4,CACNB4,RAMP1,HBEGF,SLC35C1,PDE5A,ACSS2,HS6ST1,MGAT4B,ESRRB,SMPD3,PDE8B,NEU1,PPARD,XYLT1,NFE2L1,ST3GAL2,BACE2,ZBTB7A,ENTPD7,SLC4A4,GAL3ST3,MGAT5,XXYLT1,EXTL3,B4GALT2,ST8SIA5,ACSL3,CROT,FASN,B4GALNT1,PFKFB…
GO:BP	vasoconstriction	GO:0042310	0.000526928	3.27825	104	1390	20	27543	MGLL,ATP2B1,APLN,ADRA1B,DOCK4,ADRA2C,PDE5A,ZDHHC21,SMPD3,RAP1GDS1,PTGS2,ARHGAP42,TRPM4,ATP1A2,HTR1B,ADRA1A,EGFR,EDNRB,ADM,EDNRA
GO:BP	gland development	GO:0048732	0.000530332	3.27545	508	1390	54	27543	LY6E,SMAD3,PTPN3,ZFP703,WNT4,ATP2B2,ITPR1,PLXND1,MAN2A1,ERBB4,PTN,ASH1L,EXT1,LMO4,ARHGAP5,CACNB4,PGR,CIT,ZDHHC21,UPF2,FRZB,AGAP2,SRC,RBPJ,RB1CC1,CEBPA,CLCN2,ZBTB7B,WNT10A,ZBTB1,NOTCH4,SRF,NCOR2,FASN,GLI3,ASCL1,ARHGAP35,EPHX1,NRG3,PCSK9,CSMD1,EGFR,MED1,WNT7B,SLIT2,ALDH1A3,SOX9,BMP2,NEURL1A,SMARCA4,HGF,NOTCH1,EDNRA,CRH
GO:BP	regulation of calcium ion transmembrane transport	GO:1903169	0.000537106	3.26994	186	1390	28	27543	NOS1AP,CALM1,CACNB3,MYO5A,JSRP1,RAMP3,JPH3,GRIN1,CACNB4,ADRB1,ATP2A1,PRKCE,STIM2,AHNAK,TMEM38A,CACNA1A,AKAP5,HTT,ATP1A2,RYR2,PDPK1,CACNA2D1,STAC3,CACNB1,ANK2,AKAP6,DRD4,EDNRA
GO:BP	inner ear development	GO:0048839	0.000585143	3.23274	209	1390	30	27543	WHRN,ATP2B2,FGF9,MAF,BMPER,GABRB2,CXCL14,H2-T23,FZD3,ESRRB,FRZB,RBPJ,CEBPA,KCNK2,PTK7,GLI3,CALB1,NTRK3,SPRY2,DVL3,CTHRC1,TRIOBP,ATP8B1,KCNK3,ALDH1A3,SOX9,BMP2,BDNF,INSIG1,NOTCH1
GO:BP	intracellular transport	GO:0046907	0.00062797	3.20206	1507	1390	121	27543	MAP6D1,RPH3A,FBXW7,TNNC1,SNAP25,FGF9,PPP3CA,BOK,BSN,RIMS1,KIF5C,ADORA1,LMTK2,SYNDIG1,EXPH5,AP1S1,CACNB3,RAB6B,MYO5C,LYST,SORT1,RILPL1,SYNE1,STX1B,KCNIP3,SPCS3,AKT2,MYO5A,SPIRE1,MYRIP,CRY2,MAP1A,ARF3,PPP3R1,HSPA1B,CCDC88C,DUSP18,DMTN,RASGRP1,RAMP3,GOLGA7B,ACTN4,LRRK2,RAB11FIP4,ACAP2,PRKCZ,PTK2,SUN1,SGTB,MYO1E,STXBP1,CACNG2,RAMP1,ANK1,SYTL1,FAM160A2,ZDHHC21,TACC1,EGR2,TUB,NAPA,ATP2A1,TECPR2,AGAP2,S…
GO:BP	muscle cell migration	GO:0014812	0.000661663	3.17936	115	1390	21	27543	FGF9,MYO5A,RAPGEF4,NET1,PLEKHO1,PTK2,DOCK4,HDAC4,TPM1,PGR,PPARD,SRC,TRIB1,EGR1,DDIT3,SORL1,PPARGC1A,MEF2C,ADAMTS1,SLIT2,DRD4
GO:BP	muscle adaptation	GO:0043500	0.00067852	3.16844	125	1390	22	27543	SMAD3,TNNC1,CAMTA2,PPP3CA,FBXO32,PTK2,HDAC4,PDE5A,FOXO3,PIN1,ADRB1,ACTA1,PPARG,FOXP1,MTPN,MYOD1,MYH7,PPARA,ADRA1A,MEF2C,AKAP6,NOTCH1
GO:BP	regulation of protein catabolic process	GO:0042176	0.000678612	3.16838	393	1390	45	27543	FBXW7,SMAD3,PTPN3,GRIN2A,DLGAP1,DAB2IP,PACSIN3,MAP1A,RNF144A,HSPA1B,UBQLN4,VGLL4,LRRK2,ADAM9,PTK2,HECW1,MAPK9,PIN1,APC,AGAP2,CLEC16A,TRIB1,NFE2L1,GIPC1,ZDHHC2,HECW2,LRP1,HACE1,NKD1,TIMP4,VHL,RNF144B,PCSK9,SORL1,GRIN2C,EGFR,SMARCC1,ANKS1,AGTPBP1,HIPK2,AQP11,SOX9,HERPUD1,CCDC22,ADAM8
GO:BP	regulation of potassium ion transport	GO:0043266	0.00072865	3.13748	106	1390	20	27543	KCNC1,PLCB4,KCNA1,ADORA1,RGS7,NETO2,KCNIP3,ATP1B2,AKAP5,KCNN2,DLG1,KCNS2,LRRC38,ATF4,ANK2,KCNAB1,AKAP6,ANK3,AMIGO1,ABCC8
GO:BP	regulation of hormone levels	GO:0010817	0.00075084	3.12445	582	1390	59	27543	SNAP25,DIO2,WNT4,ATP1A1,PPP3CA,APLN,ADORA1,CDK16,GCNT4,MYO5A,RAPGEF4,MYRIP,CRY2,HSD11B1,EFNA5,E030003E18RIK,BRSK2,CNR1,NR1D1,RASL10B,DIO3,SMPD3,STARD3,PDE8B,PCLO,PPARD,ARRB1,PPARG,STXBP5L,KCNJ11,PRKCE,DHRS3,CPLX1,ACVR1C,CLCN2,CACNA1A,TRPM4,EGR1,KISS1,CYP11A1,RBP4,SLC39A14,HSD17B7,IGF1R,PPARGC1A,EGFR,EDNRB,CYB5R4,MED1,RAB11FIP3,ADM,ALDH1A3,SCHIP1,ABCC8,BMP2,SLCO1C1,RFX3,CRH,INHBA
GO:BP	neuromuscular junction development	GO:0007528	0.000752269	3.12363	54	1390	14	27543	SORBS2,CACNB3,PTN,CNTNAP1,LRRK2,CACNG2,CACNB4,LRP4,UNC13A,FZD9,UNC13B,UTRN,CACNB1,ANK3
GO:BP	regulation of cell-substrate adhesion	GO:0010810	0.000766891	3.11527	223	1390	31	27543	SMAD3,WNT4,GPM6B,FMN1,PTN,DMTN,EFNA5,ACTN4,FAM107A,PRKCZ,PTK2,FERMT2,PTPRZ1,SRC,PRKCE,DMP1,DUSP3,CORO2B,PREX1,SMOC2,PTPRJ,ACVRL1,UTRN,TRIOBP,GCNT2,RCC2,FBLN2,COL26A1,DUSP22,NOTCH1,HPSE
GO:BP	actin-mediated cell contraction	GO:0070252	0.000779086	3.10841	97	1390	19	27543	TNNC1,ATP1A1,ADORA1,CCDC88C,SCN1B,MYH2,TPM1,ADRB1,ATP2A1,TRPM4,KCNN2,DLG1,MYH7,ATP1A2,RYR2,CACNA2D1,ANK2,AKAP6,FRMD6
GO:BP	regulation of muscle adaptation	GO:0043502	0.000779086	3.10841	97	1390	19	27543	SMAD3,TNNC1,PPP3CA,FBXO32,PTK2,HDAC4,PDE5A,FOXO3,PIN1,ADRB1,PPARG,FOXP1,MTPN,MYH7,PPARA,ADRA1A,MEF2C,AKAP6,NOTCH1
GO:BP	negative regulation of protein-containing complex disassembly	GO:0043242	0.000802411	3.0956	88	1390	18	27543	MAP6D1,SPTBN2,MAP1A,UBQLN4,DMTN,SPTB,NAV3,TPM1,SWAP70,APC,CLEC16A,MTPN,GAS2L1,ARHGEF2,TRIM54,CAMSAP1,TWF2,ADD2
GO:BP	regulation of protein transport	GO:0051223	0.000808794	3.09216	542	1390	56	27543	FBXW7,PPP3CA,EXPH5,CACNB3,CDK16,AKT2,OLFR78,RAPGEF4,MYRIP,DMTN,EFNA5,MYO18A,LRRK2,ADAM9,BRSK2,PRKCZ,APBB1,SRCIN1,IL12A,CNR1,NR1D1,ADRB1,PDE8B,PPARD,ARRB1,SRC,PPARG,STXBP5L,CDK5R1,KCNJ11,PKIG,PRKCE,ZDHHC2,MTCL1,ACVR1C,MAPK14,PTGS2,TRPM4,MYH10,AKAP5,RBP4,ACSL3,GLI3,UNC13B,DDI2,SORL1,PIK3R2,EGFR,ANK3,RAB11FIP3,DRD4,ABCC8,SEC16B,RFX3,INSIG1,CRH
GO:BP	negative regulation of cell growth	GO:0030308	0.000826646	3.08268	201	1390	29	27543	SMAD3,RTN4R,FSTL4,DAB2IP,HSPA1B,VGLL4,PPP1R9B,DACT3,DCBLD2,DIP2B,FRZB,PPARD,PPARG,CDK5R1,PSRC1,FOXP1,SMARCA2,GAS2L1,PTPRJ,ACVRL1,CGRRF1,SERTAD1,PPARA,CDHR2,PTPRS,SEMA3G,SLIT2,SMARCA4,INHBA
GO:BP	positive regulation of lipid metabolic process	GO:0045834	0.000841329	3.07503	190	1390	28	27543	DGKZ,CCDC3,WNT4,ADORA1,ABHD6,ERBB4,AKT2,LPGAT1,DAGLB,FGFR3,MAPK9,NR1D1,SMPD3,PPARD,STARD4,SRC,PPARG,PRKCE,PTGS2,EPHA8,ACSL3,SREBF2,IGF1R,GPAM,PPARGC1A,PPARA,SEC14L2,VAV3
GO:BP	pallium development	GO:0021543	0.000841329	3.07503	190	1390	28	27543	PLCB1,KCNA1,PHACTR1,CDK5R2,DAB2IP,ZBTB18,ZMIZ1,PPP1R9B,SUN1,GRIN1,DAB1,TACC1,RELN,CDK5R1,TBR1,NTRK2,MAS1,SUN2,SRF,GLI3,ASCL1,IGF1R,HTR6,EGFR,PTPRS,SLIT2,BCAN,BTBD3
GO:BP	tissue homeostasis	GO:0001894	0.000842179	3.0746	271	1390	35	27543	WHRN,BAP1,S1PR1,ERBB4,MAP1A,TFRC,E030003E18RIK,HOMER1,EXT1,ATP1B2,ANKRD11,HOMER2,ESRRB,TUB,SRC,EPAS1,PTGS2,SCX,ITGAV,RBP4,SRF,VHL,INPP5D,CD7,AKT3,EGFR,APBB2,GCNT2,WWTR1,YAP1,SOX9,ABCC8,SYK,NOTCH1,ADAM8
GO:BP	hormone-mediated signaling pathway	GO:0009755	0.000842565	3.0744	179	1390	27	27543	PAK1,OLFR78,CRY2,NR3C1,PAQR8,ZMIZ1,ESRRG,PGR,NR1D1,ESRRB,PPARD,SRC,NTRK2,ZBTB7A,ABHD2,ESRRA,FOXP1,NCOR2,PER1,PPARA,MED1,PRCP,NR1D2,YAP1,BDNF,SMARCA4,CRH
GO:BP	embryonic organ development	GO:0048568	0.000848426	3.07139	502	1390	53	27543	WHRN,ZFPM1,SMAD3,WNT9A,ATP2B2,FGF9,SENP2,DLX1AS,E030003E18RIK,FZD3,MIB1,MICAL2,HS6ST1,ESRRB,FRZB,RBPJ,PLXNA4,EPAS1,CEBPA,PLCD3,ITGAV,DLG1,LMO2,ENG,RBP4,PTK7,SRF,GLI3,RYR2,HSD17B7,SOCS3,KITL,SPRY2,ATF4,DVL3,CTHRC1,MEF2C,EGFR,TRIOBP,MED1,WNT7B,NES,SOX18,ADM,ALDH1A3,YAP1,HIPK2,SOX9,BIRC6,SMARCA4,INSIG1,NOTCH1,EDNRA
GO:BP	reproductive system development	GO:0061458	0.000872775	3.0591	516	1390	54	27543	ETNK2,WNT4,FGF9,BOK,SENP2,TYRO3,IL11RA1,PTN,ASH1L,TESC,PPP1R9B,MERTK,CTNNA2,HTRA1,FOXO3,PGR,HS6ST1,ESRRB,PPARD,ARRB1,SRC,RBPJ,EPAS1,MAPK14,PTGS2,CEBPA,SCX,PLCD3,NEFH,KISS1,MAS1,ITGAV,DLG1,RBP4,GLI3,PEG10,AXL,LGR4,SOCS3,ACSBG1,KITL,CSMD1,EGFR,MED1,WNT7B,ADAMTS1,ADM,SLIT2,NRIP1,SCHIP1,SOX9,BIRC6,NOTCH1,INHBA
GO:BP	postsynaptic membrane organization	GO:0001941	0.000873597	3.05869	47	1390	13	27543	SORBS2,DLG4,ZMYND8,CHRDL1,NRXN1,PTN,GLRB,SHANK3,RELN,LRP4,ZDHHC2,MAGI2,FZD9
GO:BP	regulation of establishment of protein localization	GO:0070201	0.000883873	3.05361	571	1390	58	27543	FBXW7,SNAP25,PPP3CA,EXPH5,CACNB3,CDK16,AKT2,OLFR78,RAPGEF4,MYRIP,DMTN,EFNA5,MYO18A,LRRK2,ADAM9,BRSK2,PRKCZ,APBB1,SRCIN1,IL12A,CNR1,NR1D1,ADRB1,PDE8B,PPARD,ARRB1,SRC,PPARG,STXBP5L,CDK5R1,KCNJ11,PKIG,PRKCE,ZDHHC2,MTCL1,ACVR1C,MAPK14,PTGS2,CORO2B,TRPM4,MYH10,AKAP5,RBP4,ACSL3,GLI3,UNC13B,DDI2,SORL1,PIK3R2,EGFR,ANK3,RAB11FIP3,DRD4,ABCC8,SEC16B,RFX3,INSIG1,CRH
GO:BP	organic substance catabolic process	GO:1901575	0.000936232	3.02862	2069	1390	155	27543	MGLL,PLCB1,FBXW7,GIT1,SMAD3,PTPN3,KCTD17,GRIN2A,DIO2,HKDC1,PLCB4,BAP1,WFS1,PLCXD2,NUDT3,DLGAP1,ADORA1,FBXL16,ABHD6,ABCD2,DAB2IP,AKT2,PACSIN3,CYP39A1,MAP1A,DAGLB,RNF144A,HSPA1B,UBQLN4,FOXK1,HSD11B1,ZNRF1,VGLL4,ABHD17A,E030003E18RIK,PLCH2,FBXO31,EXT1,GLS,LRRK2,FOXK2,ADAM9,UBE3B,KCTD6,BRSK2,PTK2,SGTB,HECW1,HDAC4,UBE2G1,MAPK9,MIB1,PDE5A,EXOG,CNR1,1700016K19RIK,NR1D1,PIN1,APC,ADRB1,DIO3,UPF2,ESRRB,SMP…
GO:BP	temperature homeostasis	GO:0001659	0.000944267	3.02491	180	1390	27	27543	DIO2,APLN,ADORA1,ABHD6,E030003E18RIK,ESRRG,CNR1,NR1D1,ADRB1,RBPJ,IL4RA,EPAS1,PTGS2,ZBTB7B,EGR1,NOVA1,DDIT3,TLE3,LGR4,PPARGC1A,ATF4,EDNRB,DYNC1H1,PTH2R,ACOT11,SYK,NOTCH1
GO:BP	regulation of cytosolic calcium ion concentration	GO:0051480	0.000959012	3.01818	63	1390	15	27543	ATP2B2,TRPC6,ITPR1,BOK,ATP2B1,ADORA1,MYO5A,MYH7B,RYR1,CACNA1A,FZD9,CALB1,RYR2,SLC8A2,HTR1B
GO:BP	renal system development	GO:0072001	0.000990691	3.00406	347	1390	41	27543	SMAD3,WNT4,WFS1,PLXND1,PPP3CA,FMN1,GCNT4,ERBB4,BMPER,EXT1,ZBTB16,LRRK2,MYO1E,LRP4,MAGI2,EGR1,DLG1,PODXL,RBP4,PTK7,GLI3,CALB1,LGR4,PCSK9,MEF2C,EDNRB,DACT2,WNT7B,ADAMTS1,WWTR1,SLIT2,YAP1,AQP11,SCHIP1,SOX9,NFIA,BMP2,BDNF,RHPN1,NOTCH1,EDNRA
GO:BP	catabolic process	GO:0009056	0.00100796	2.99656	2454	1390	178	27543	MGLL,PLCB1,FBXW7,GIT1,SMAD3,PTPN3,KCTD17,ATF6,GRIN2A,DIO2,CALM1,HKDC1,PLCB4,BAP1,WFS1,PLCXD2,BOK,NUDT3,DLGAP1,ADORA1,FBXL16,ABHD6,ABCD2,DAB2IP,AKT2,MYO5A,PACSIN3,CYP39A1,MAP1A,DAGLB,RNF144A,HSPA1B,UBQLN4,FOXK1,HSD11B1,ZNRF1,VGLL4,ABHD17A,E030003E18RIK,PLCH2,FBXO31,EXT1,GLS,LRRK2,FOXK2,ADAM9,UBE3B,KCTD6,BRSK2,PIP4K2C,PTK2,SGTB,HECW1,HDAC4,UBE2G1,MAPK9,MIB1,PDE5A,EXOG,CNR1,1700016K19RIK,FOXO3,NR1D1…
GO:BP	negative regulation of neurogenesis	GO:0050768	0.00101796	2.99227	159	1390	25	27543	LINGO1,TRPC6,BRINP1,PPP3CA,RTN4R,FSTL4,PTN,GPR37L1,PTK2,SYNGAP1,NR1D1,DAB1,DIP2B,CDK5R1,LRP4,NTRK3,SORL1,ARHGEF2,PTPRS,WNT7B,SEMA3G,SLIT2,ABCC8,BDNF,NOTCH1
GO:BP	cell-matrix adhesion	GO:0007160	0.00103374	2.98559	226	1390	31	27543	SMAD3,WNT4,GPM6B,FMN1,DMTN,EFNA5,FAM107A,ADAM9,SIRPA,PRKCZ,PTK2,FERMT2,SRC,ITGAL,DUSP3,CORO2B,ITGAV,ACTN1,PTPRJ,ACVRL1,SRF,MSLNL,PDPK1,UTRN,ITGB8,RCC2,DUSP22,BCAN,RHPN1,HPSE,ADAM8
GO:BP	steroid hormone mediated signaling pathway	GO:0043401	0.00103876	2.98349	128	1390	22	27543	PAK1,OLFR78,CRY2,NR3C1,PAQR8,ZMIZ1,ESRRG,PGR,ESRRB,SRC,NTRK2,ZBTB7A,ABHD2,ESRRA,FOXP1,NCOR2,PER1,PPARA,MED1,YAP1,BDNF,SMARCA4
GO:BP	import across plasma membrane	GO:0098739	0.00105722	2.97584	181	1390	27	27543	SLC39A10,SLC24A2,ATP1A1,SLC6A1,AKT2,SLC1A3,RAMP3,SLC1A2,ACSL6,SLC12A5,KCNJ9,ATP1B2,KCNJ12,SLC9A5,KCNJ10,ADRB1,KCNJ11,SLC36A1,TRPM4,DLG1,ATP1A2,KCNK9,SLC39A14,SLC8A2,SCNN1A,LRRC8C,HCN2
GO:BP	regulation of striated muscle contraction	GO:0006942	0.00114239	2.94219	90	1390	18	27543	CALM1,MYBPC3,ATP1A1,ADORA1,ADRA1B,HDAC4,PDE5A,ADRB1,ATP2A1,TMEM38A,TRPM4,DLG1,MYH7,ATP1A2,RYR2,ADRA1A,ANK2,AKAP6
GO:BP	regulation of cardiac muscle cell proliferation	GO:0060043	0.00114289	2.942	48	1390	13	27543	FGF9,ERBB4,VGLL4,RBPJ,MAPK14,PIM1,KCNK2,FOXP1,RBP4,MEF2C,MAPK11,YAP1,NOTCH1
GO:BP	exocytic process	GO:0140029	0.00114989	2.93934	81	1390	17	27543	SNAP25,CPLX2,STX1B,PRRT2,DMTN,SYT1,ERC2,STXBP1,GRIK5,PPFIA3,PCLO,NAPA,CPLX1,UNC13A,UNC13B,RAB3C,SYK
GO:BP	camera-type eye development	GO:0043010	0.00117666	2.92935	362	1390	42	27543	SMAD3,ATP2B2,ATP2B1,MAN2A1,MAF,FJX1,PTN,E030003E18RIK,MEGF11,MERTK,DIO3,TUB,HCN1,FAT3,NTRK2,CLCN2,MYH10,DLG1,RBP4,ACVRL1,SDK1,SRF,GLI3,CALB1,ARHGAP35,VHL,NTRK3,SPRED1,SPRY2,SDK2,ATF4,EGFR,MED1,NES,AGTPBP1,ALDH1A3,HIPK2,SOX9,EPHB1,DSCAM,SMARCA4,INHBA
GO:BP	cellular response to external stimulus	GO:0071496	0.00119149	2.92391	375	1390	43	27543	WNT4,ATP1A1,ATP2B1,TFRC,LRRK2,SLC1A2,FAM107A,BRSK2,HDAC4,FOXO3,PLEC,CLEC16A,PPARG,CPEB4,RNF152,MAP3K14,PTGS2,SCX,BRSK1,PIM1,MTPN,GAS2L1,MYOD1,ENG,FNIP1,SRF,ATP1A2,ARHGAP35,SREBF2,AXL,IGF1R,PCSK9,SNW1,PPARA,ATF4,EGFR,WIPI1,MED1,SLC38A3,KLF10,SOX9,NUAK1,EDNRA
GO:BP	regulation of protein-containing complex disassembly	GO:0043244	0.00119332	2.92324	129	1390	22	27543	MAP6D1,SPTBN2,MAP1A,UBQLN4,DMTN,SPTB,NAV3,TPM1,SWAP70,APC,CLEC16A,SH3BP1,ATG12,MTPN,GAS2L1,IGF1R,ARHGEF2,TRIM54,CAMSAP1,TWF2,NES,ADD2
GO:BP	positive regulation of cell junction assembly	GO:1901890	0.00119944	2.92102	119	1390	21	27543	SMAD3,WNT4,CUX2,LRTM2,FMN1,SYNDIG1,NRXN1,PTPRD,CLSTN1,EFNA5,FERMT2,FLRT2,NTRK2,PTPRJ,SLITRK1,NTRK3,STAU2,HOPX,AMIGO1,EPHB1,BDNF
GO:BP	synaptic membrane adhesion	GO:0099560	0.00120823	2.91785	34	1390	11	27543	NRXN1,PTPRD,EFNA5,LRRC4C,IGSF9B,MAPK14,NTNG2,MAGI2,SLITRK1,PTPRS,PTPRF
GO:BP	sensory organ morphogenesis	GO:0090596	0.00125573	2.90111	300	1390	37	27543	WHRN,ATP2B2,FGF9,MAN2A1,FJX1,PTN,E030003E18RIK,MEGF11,FZD3,DIO3,HCN1,FRZB,OLFM3,FAT3,NTRK2,RBP4,SDK1,PTK7,GLI3,CALB1,VHL,STAU2,SPRY2,SDK2,ATF4,DVL3,CTHRC1,TRIOBP,AGTPBP1,ALDH1A3,HIPK2,SOX9,EPHB1,DSCAM,BDNF,INSIG1,EDNRA
GO:BP	multicellular organismal response to stress	GO:0033555	0.00127842	2.89333	100	1390	19	27543	BRINP1,PPP3CA,KCNIP3,SPIRE1,SHANK3,EXT1,PRKAR1B,ADRB1,PDE8B,RELN,CACNA1A,LYPD1,ATP1A2,ASIC1,MEF2C,EDNRB,DRD4,BDNF,CRH
GO:BP	response to metal ion	GO:0010038	0.00128106	2.89243	376	1390	43	27543	TNNC1,GRIN2A,KCNC1,CALM1,SLC13A5,KCNA1,DLG4,ADCY1,PPP3CA,SLC25A23,SLC30A4,NRXN1,SLC6A1,KCNIP3,TFRC,KCNH1,DMTN,SYT1,RYR1,HOMER1,LRRK2,LCAT,SYT12,ADAM9,CACNG2,MAPK9,SMPD3,ACTA1,HCN1,NFE2L1,SYT13,PTGS2,CEBPA,ASCL1,RYR2,ATF4,MEF2C,EGFR,ANXA11,ANK3,KCNK3,NPTX1,ABCC8
GO:BP	regulation of transmembrane receptor protein serine/threonine kinase signaling pathway	GO:0090092	0.00131146	2.88224	252	1390	33	27543	SMAD3,ZFP703,NBL1,FGF9,CHRDL1,BMPER,VASN,HTRA1,PIN1,RNF165,RBPJ,NREP,RASL11B,GIPC1,ZBTB7A,MAGI2,ENG,ACVRL1,PEG10,LRG1,SPRED1,SORL1,SNW1,PDPK1,SPRY2,PPARA,ADAMTSL2,FBXL15,DACT2,HIPK2,BMP2,NOTCH1,INHBA
GO:BP	response to mechanical stimulus	GO:0009612	0.00131146	2.88224	252	1390	33	27543	ANO3,WHRN,KCNC1,KCNA1,ATP2B2,ATP1A1,CACNB3,NRXN1,STRBP,PTN,SLC1A3,SHANK3,HDAC4,PLEC,CXCL12,ACTA1,SRC,PPARG,MAP3K14,MAPK14,PTGS2,SCX,KCNK2,HTT,MTPN,ENG,ATP1A2,RYR2,IGF1R,EGFR,ETV1,SOX9,EDNRA
GO:BP	hemopoiesis	GO:0030097	0.00131764	2.8802	970	1390	85	27543	PLCB1,FBXW7,ZFPM1,WNT4,BAP1,HERC6,CAMK4,CRIP2,PPP3CA,TYRO3,RORA,IL11RA1,PTN,MPL,TFRC,SSBP3,RASSF2,HSPA1B,DMTN,RASGRP1,EXT1,ZBTB16,TESC,ZMIZ1,SIRPA,PRKCZ,MERTK,MYO1E,TTC7,IL12A,POU2F2,ANK1,PTPRZ1,ETV6,FOXO3,SMPD3,SRC,RBPJ,TRIB1,NFE2L1,ZBTB7A,IL4RA,EPAS1,MAPK14,ENTPD7,CEBPA,ESRRA,ZBTB7B,PREX1,EGR1,PIM1,MELK,FOXP1,LMO2,GAS2L1,ACTN1,FZD9,ZBTB1,FNIP1,SRF,FASN,GLI3,MKNK2,AXL,INPP5D,KITL,SOX6,ATF4,SLC4A…
GO:BP	regulation of cardiac muscle contraction	GO:0055117	0.00133397	2.87485	73	1390	16	27543	CALM1,ATP1A1,ADORA1,ADRA1B,HDAC4,PDE5A,ADRB1,ATP2A1,TMEM38A,TRPM4,DLG1,ATP1A2,RYR2,ADRA1A,ANK2,AKAP6
GO:BP	regulation of smooth muscle cell migration	GO:0014910	0.00135745	2.86728	91	1390	18	27543	FGF9,MYO5A,RAPGEF4,PTK2,DOCK4,HDAC4,TPM1,PGR,PPARD,SRC,TRIB1,EGR1,SORL1,PPARGC1A,MEF2C,ADAMTS1,SLIT2,DRD4
GO:BP	import into cell	GO:0098657	0.00138472	2.85864	229	1390	31	27543	SLC39A10,SLC24A2,ATP1A1,GPM6B,SLC6A1,AKT2,SLC1A3,RAMP3,SLC1A2,ACSL6,SLC12A5,KCNJ9,ATP1B2,KCNJ12,SLC9A5,KCNJ10,ADRB1,SMPD3,KCNJ11,SLC36A1,TRPM4,DLG1,RBP4,ACSL3,ATP1A2,KCNK9,SLC39A14,SLC8A2,SCNN1A,LRRC8C,HCN2
GO:BP	epithelial to mesenchymal transition	GO:0001837	0.00140642	2.85189	151	1390	24	27543	SMAD3,ZFP703,OLFM1,WNT4,DAB2IP,VASN,PPP3R1,DACT3,FERMT2,TCOF1,RBPJ,ENG,NOTCH4,LRG1,SPRED1,SPRY2,AXIN2,GCNT2,WWTR1,SOX9,BMP2,RGCC,NOTCH1,EDNRA
GO:BP	regulation of actin filament organization	GO:0110053	0.00142439	2.84637	277	1390	35	27543	SMAD3,WNT4,PAK1,CYFIP2,S1PR1,FMN1,PPP1R9A,SHANK1,SPTBN2,DMTN,SHANK3,SPTB,ARHGEF10L,FERMT2,CTNNA2,BAIAP2,TPM1,SWAP70,CIT,PRKCE,SH3BP1,CORO2B,DLG1,MTPN,WASF1,ARHGAP35,ROCK2,PIK3R2,TWF2,BRK1,ADD2,SLIT2,ESAM,RGCC,RHPN1
GO:BP	regulation of small molecule metabolic process	GO:0062012	0.00146763	2.83338	365	1390	42	27543	ARPP19,GIT1,WNT4,IGFBP4,RORA,DKKL1,AKT2,LPGAT1,FOXK1,FOXK2,TTC39B,HDAC4,MAPK9,CNR1,NR1D1,ESRRB,PPARD,STARD4,SRC,PPARG,RANBP2,PRKCE,NFE2L1,ZBTB7A,PTGS2,CLCN2,CACNA1A,SLC4A4,EGR1,MAS1,NCOR2,GPT,SREBF2,PPARGC1A,PPARA,CD320,SLC4A1,SEC14L2,SOX9,BMP2,FAM3C,INSIG1
GO:BP	reproductive structure development	GO:0048608	0.00147379	2.83156	511	1390	53	27543	ETNK2,WNT4,FGF9,BOK,SENP2,TYRO3,IL11RA1,PTN,ASH1L,TESC,MERTK,CTNNA2,HTRA1,FOXO3,PGR,HS6ST1,ESRRB,PPARD,ARRB1,SRC,RBPJ,EPAS1,MAPK14,PTGS2,CEBPA,SCX,PLCD3,NEFH,KISS1,MAS1,ITGAV,DLG1,RBP4,GLI3,PEG10,AXL,LGR4,SOCS3,ACSBG1,KITL,CSMD1,EGFR,MED1,WNT7B,ADAMTS1,ADM,SLIT2,NRIP1,SCHIP1,SOX9,BIRC6,NOTCH1,INHBA
GO:BP	cerebellar cortex development	GO:0021695	0.00148074	2.82952	65	1390	15	27543	WHRN,ATP2B2,RORA,NRXN1,SPTBN2,ZFP365,CACNA1A,MYH10,MTPN,B4GALT2,HERC1,NFIX,AGTPBP1,SEZ6L,NAV2
GO:BP	regulation of neuron migration	GO:2001222	0.00148396	2.82858	49	1390	13	27543	SCRT1,PHACTR1,DAB2IP,FBXO31,CTNNA2,SCRT2,PTPRZ1,TBC1D24,FLRT2,RELN,NTNG2,NRG3,ARHGEF2
GO:BP	cardiac muscle hypertrophy	GO:0003300	0.00150083	2.82367	101	1390	19	27543	SMAD3,SORBS2,CAMTA2,PPP3CA,FBXO32,PTK2,PDE5A,PIN1,ADRB1,PPARG,FOXP1,MTPN,MYH7,RYR2,PPARA,ADRA1A,MEF2C,AKAP6,NOTCH1
GO:BP	response to peptide hormone	GO:0043434	0.00151429	2.81979	444	1390	48	27543	PLCB1,PRKCB,ATP2B1,SORT1,AKT2,MYO5A,INPPL1,CRY2,PRKCZ,PIP4K2C,PTK2,CPEB2,APC,EGR2,CXCL12,ATP2A1,SRC,ACVR1C,MAPK14,PTGS2,ESRRA,ZBTB7B,EGR1,MAS1,RAB31,CYP11A1,RBP4,SLC39A14,GPT,IGF1R,SOCS3,PCSK9,TRIM72,SORL1,PDPK1,GPAM,OSBPL8,AKT3,PPARA,PIK3R2,EDNRB,SMARCC1,PTPRF,ADM,ABCC8,INSIG1,EDNRA,GPR21
GO:BP	organonitrogen compound catabolic process	GO:1901565	0.00152048	2.81802	1296	1390	106	27543	FBXW7,SMAD3,PTPN3,KCTD17,GRIN2A,DIO2,BAP1,WFS1,NUDT3,DLGAP1,FBXL16,DAB2IP,PACSIN3,MAP1A,RNF144A,HSPA1B,UBQLN4,ZNRF1,VGLL4,ABHD17A,FBXO31,EXT1,GLS,LRRK2,ADAM9,UBE3B,KCTD6,BRSK2,PTK2,SGTB,HECW1,UBE2G1,MAPK9,MIB1,PDE5A,1700016K19RIK,NR1D1,PIN1,APC,DIO3,SMPD3,PDE8B,NEU1,AGAP2,ARRB1,CLEC16A,RNF165,USP2,TRIB1,SDF2L1,NFE2L1,FBXO33,GIPC1,ZDHHC2,ENTPD7,HECW2,SCLY,TBL1XR1,USP31,LRP1,HACE1,HERC2,NKD1,TTC3,R…
GO:BP	regulation of dendritic spine morphogenesis	GO:0061001	0.0015474	2.8104	57	1390	14	27543	SIPA1L1,LZTS3,ARC,CUX2,PPP1R9A,SHANK3,LRRK2,SRCIN1,BAIAP2,RELN,CDK5R1,STAU2,ARHGAP33,TANC2
GO:BP	fear response	GO:0042596	0.0015474	2.8104	57	1390	14	27543	BRINP1,SPIRE1,SHANK3,EXT1,PRKAR1B,ADRB1,PDE8B,LYPD1,ATP1A2,ASIC1,MEF2C,DRD4,BDNF,CRH
GO:BP	membrane hyperpolarization	GO:0060081	0.00158585	2.79974	17	1390	8	27543	ATP1A1,CACNB3,PRKCZ,KCNQ3,CACNG2,KCNJ10,HCN1,CRTC1
GO:BP	organic anion transport	GO:0015711	0.00158899	2.79888	379	1390	43	27543	GRM2,STARD10,SLC13A5,SFXN5,ADORA1,SLC25A23,SLC6A1,SLC16A6,SLC1A3,SLC23A3,SLC25A18,SLC1A2,STXBP1,SLC4A11,CACNB4,SLCO2A1,MAPK9,KCNJ10,NFE2L1,NTRK2,MFSD12,SLC6A17,SLC36A1,GIPC1,PTGS2,CACNA1A,SLC4A4,SLC25A22,PLA2G5,HTR1B,HTR6,SLC4A8,SLC4A1,LRRC8C,SLC38A3,ATP8B1,PLEKHA8,SLC25A42,DRD4,BDNF,SLCO1C1,SYK,CAR4
GO:BP	regulation of circadian rhythm	GO:0042752	0.00159756	2.79654	121	1390	21	27543	FBXW7,KCNA2,ADCY1,ADORA1,RORA,CRY2,BHLHE40,CIPC,MAPK9,NR1D1,ADRB1,USP2,CRTC1,NR2F6,CORT,PER1,PPARGC1A,PPARA,NR1D2,KLF10,DRD4
GO:BP	regulation of receptor internalization	GO:0002090	0.00162276	2.78975	74	1390	16	27543	DLG4,PACSIN1,ARC,APLN,PIP5K1C,IQSEC1,PPP3R1,ARRB1,ANKRD13B,MAGI2,AKAP5,NUMB,PCSK9,FMR1,DRD4,SYK
GO:BP	negative regulation of nervous system development	GO:0051961	0.00164338	2.78426	163	1390	25	27543	LINGO1,TRPC6,BRINP1,PPP3CA,RTN4R,FSTL4,PTN,GPR37L1,PTK2,SYNGAP1,NR1D1,DAB1,DIP2B,CDK5R1,LRP4,NTRK3,SORL1,ARHGEF2,PTPRS,WNT7B,SEMA3G,SLIT2,ABCC8,BDNF,NOTCH1
GO:BP	amino acid transport	GO:0006865	0.00164338	2.78426	163	1390	25	27543	GRM2,SFXN5,ADORA1,SLC6A1,SLC1A3,SLC25A18,SLC1A2,STXBP1,CACNB4,KCNJ10,NFE2L1,NTRK2,MFSD12,SLC6A17,SLC36A1,GIPC1,CACNA1A,SLC25A22,HTR1B,HTR6,LRRC8C,SLC38A3,XK,SLC7A4,BDNF
GO:BP	heart trabecula morphogenesis	GO:0061384	0.00168172	2.77425	35	1390	11	27543	HEG1,S1PR1,RBPJ,ENG,RBP4,SRF,MED1,ADAMTS1,SMARCA4,FHL2,NOTCH1
GO:BP	negative regulation of neuron death	GO:1901215	0.0017201	2.76445	255	1390	33	27543	NOS1AP,WFS1,ITPR1,BOK,TYRO3,GABRB2,BTBD10,LRRK2,GRIN1,STXBP1,PTPRZ1,SYNGAP1,TBC1D24,PIN1,AGAP2,ARRB1,CPEB4,NTRK2,CACNA1A,OXR1,FZD9,AXL,SORL1,PDPK1,PPARGC1A,PPARA,ATF4,MEF2C,NES,HIPK2,BDNF,SNCB,ADAM8
GO:BP	smooth muscle cell migration	GO:0014909	0.00175795	2.75499	102	1390	19	27543	FGF9,MYO5A,RAPGEF4,PTK2,DOCK4,HDAC4,TPM1,PGR,PPARD,SRC,TRIB1,EGR1,DDIT3,SORL1,PPARGC1A,MEF2C,ADAMTS1,SLIT2,DRD4
GO:BP	positive regulation of canonical Wnt signaling pathway	GO:0090263	0.00175795	2.75499	102	1390	19	27543	SMAD3,FGF9,LYPD6,LRRK2,CSNK1G2,PLEKHA4,PIN1,SRC,RBPJ,FAM53B,TMEM198,TBL1XR1,TRPM4,PTK7,FZD9,LGR4,RSPO2,EGFR,YAP1
GO:BP	endothelial cell migration	GO:0043542	0.00178995	2.74716	220	1390	30	27543	FBXW7,PLXND1,DAB2IP,BMPER,PTN,PTK2,PRKCA,SH3BP1,GIPC1,PTGS2,FOXP1,ITGAV,SMOC2,ACVRL1,SRF,VHL,SPRED1,PDPK1,ROCK2,AKT3,PIK3R2,MEF2C,PRCP,SOX18,DNAJA4,SLIT2,RGCC,NOTCH1,MYH9,ADAM8
GO:BP	organic hydroxy compound transport	GO:0015850	0.00179586	2.74573	292	1390	36	27543	LY6E,GRM2,PRKCB,KCNA2,GPM6B,ZDHHC8,MYO5A,OSBP2,SYT1,LCAT,SYT12,TTC39B,OSBPL3,CNR1,OSBPL1A,SMPD3,CXCL12,STARD3,STARD4,SYT13,GRAMD1B,RBP4,EEPD1,SLC2A13,LIPG,SREBF2,OSBPL6,PCSK9,OSBPL8,HTR1B,HTR6,ATP8B1,AQP11,SLCO1C1,SYK,CRH
GO:BP	kidney epithelium development	GO:0072073	0.00179814	2.74518	153	1390	24	27543	SMAD3,WNT4,FMN1,BMPER,EXT1,MYO1E,MAGI2,DLG1,PODXL,GLI3,CALB1,LGR4,MEF2C,EDNRB,WNT7B,WWTR1,SLIT2,YAP1,AQP11,SOX9,BMP2,BDNF,NOTCH1,EDNRA
GO:BP	chondrocyte differentiation	GO:0002062	0.00183172	2.73714	112	1390	20	27543	SMAD3,WNT9A,FGF9,MAF,EXT1,ZBTB16,SMPD3,MEF2D,MAPK14,SCX,GLI3,SLC39A14,SOX5,SOX6,AXIN2,MEF2C,ARID5A,SOX9,BMP2,PTHLH
GO:BP	protein depolymerization	GO:0051261	0.00183896	2.73543	122	1390	21	27543	MAP6D1,SPTBN2,MAP1A,DMTN,SPTB,PPP1R9B,NAV3,MICAL2,TPM1,SWAP70,APC,SH3BP1,MTPN,GAS2L1,MICAL3,ARHGEF2,TRIM54,CAMSAP1,TWF2,NES,ADD2
GO:BP	regulation of protein depolymerization	GO:1901879	0.0019015	2.7209	93	1390	18	27543	MAP6D1,SPTBN2,MAP1A,DMTN,SPTB,NAV3,TPM1,SWAP70,APC,SH3BP1,MTPN,GAS2L1,ARHGEF2,TRIM54,CAMSAP1,TWF2,NES,ADD2
GO:BP	peptidyl-tyrosine dephosphorylation	GO:0035335	0.0019015	2.7209	93	1390	18	27543	PTPN3,DUSP7,DUSP14,DUSP1,PTPRD,DUSP18,PTPRT,PTPRB,PTPRZ1,PTPN4,DUSP3,DUSP6,PTPRJ,PTP4A1,PTPRS,PTPRF,DUSP22,CDC25B
GO:BP	regulation of the force of heart contraction	GO:0002026	0.00204934	2.68839	29	1390	10	27543	MYL4,ATP1A1,APLN,PDE5A,ADRB1,MYH7,ATP1A2,RYR2,ADRA1A,ADM
GO:BP	positive regulation of long-term synaptic potentiation	GO:1900273	0.00204934	2.68839	29	1390	10	27543	ADCY1,SHANK3,NPTN,PRKAR1B,ADRB1,RELN,CRTC1,ZDHHC2,AKAP5,IGSF11
GO:BP	stress-activated protein kinase signaling cascade	GO:0031098	0.00205212	2.6878	245	1390	32	27543	PLCB1,SMAD3,DAB2IP,DUSP1,RASSF2,CCDC88C,RASGRP1,LRRK2,SIRPA,PTK2,MAPK9,HIPK3,TRIB1,IGFBP6,TNFRSF19,RB1CC1,MAPK14,DUSP3,DLG1,MAPK8IP1,PER1,IGF1R,STRADB,MAP3K10,EGFR,WNT7B,MAPK11,HIPK2,DUSP22,EPHB1,BMP2,HGF
GO:BP	regulation of catabolic process	GO:0009894	0.00211207	2.67529	936	1390	82	27543	FBXW7,GIT1,SMAD3,PTPN3,ATF6,GRIN2A,BOK,DLGAP1,ADORA1,DAB2IP,AKT2,PACSIN3,MAP1A,DAGLB,RNF144A,HSPA1B,UBQLN4,FOXK1,HSD11B1,VGLL4,LRRK2,FOXK2,ADAM9,PIP4K2C,PTK2,HECW1,HDAC4,MAPK9,CNR1,FOXO3,PIN1,APC,ESRRB,AGAP2,CLEC16A,PKP1,TRIB1,PRKCE,NFE2L1,RNF152,GIPC1,ZBTB7A,ZDHHC2,MTCL1,RB1CC1,HECW2,SLC4A4,LRP1,HACE1,ATG12,HTT,NKD1,HERC1,DDIT3,TIMP4,VHL,RNF144B,PCSK9,SORL1,PPARGC1A,FMR1,PPARA,AXIN2,PIK3R2,QK,SL…
GO:BP	regulation of organ growth	GO:0046620	0.00212115	2.67343	113	1390	20	27543	FGF9,ERBB4,VGLL4,WWC1,PTK2,PIN1,ADRB1,RBPJ,MAPK14,DUSP6,PIM1,KCNK2,FOXP1,RBP4,PPARA,MEF2C,AKAP6,MAPK11,YAP1,NOTCH1
GO:BP	phospholipid biosynthetic process	GO:0008654	0.00222382	2.6529	234	1390	31	27543	DGKZ,TTC7B,ETNK2,PIP5K1C,ERBB4,LPCAT4,PIP5K1B,INPPL1,LPGAT1,CDS1,LCAT,PI4KA,ACSL6,AGPAT3,PIGZ,PIP4K2C,TTC7,INPP4A,PPARD,ABHD8,PGS1,FAM126B,ACSL3,SOCS3,GPAM,PIK3R2,SAMD8,DGKI,SLA2,IDI1,MVD
GO:BP	positive regulation of fat cell differentiation	GO:0045600	0.00224527	2.64873	67	1390	15	27543	CCDC3,MEDAG,DKKL1,CDS1,ZBTB16,METRNL,FRZB,PPARG,MAPK14,PTGS2,CEBPA,ZBTB7B,TRPM4,PIM1,BMP2
GO:BP	hormone biosynthetic process	GO:0042446	0.00224527	2.64873	67	1390	15	27543	DIO2,WNT4,ATP1A1,DIO3,STARD3,PDE8B,CLCN2,CACNA1A,EGR1,CYP11A1,HSD17B7,IGF1R,PPARGC1A,MED1,BMP2
GO:BP	smooth muscle cell proliferation	GO:0048659	0.00227123	2.64374	188	1390	27	27543	FGF9,S1PR1,APLN,PTK2,HDAC4,IL12A,HBEGF,TPM1,NDRG2,SMPD3,PPARD,PPARG,TRIB1,MEF2D,PTGS2,EGR1,FOXP1,DDIT3,IGF1R,PPARGC1A,HTR1B,MEF2C,EGFR,ADAMTS1,DRD4,BMP2,EDNRA
GO:BP	positive regulation of synaptic transmission, glutamatergic	GO:0051968	0.00231136	2.63613	36	1390	11	27543	GRIN2A,NRXN1,GRIA4,SHANK3,STXBP1,CACNG2,RELN,NTRK2,PTGS2,SHANK2,EGFR
GO:BP	blood vessel diameter maintenance	GO:0097746	0.00232653	2.63329	166	1390	25	27543	MGLL,ATP2B1,APLN,ADORA1,ADRA1B,EXT1,PTK2,DOCK4,ADRA2C,PDE5A,ADRB1,ZDHHC21,SMPD3,PPARD,RAP1GDS1,PTGS2,ARHGAP42,TRPM4,ATP1A2,HTR1B,ADRA1A,EGFR,EDNRB,ADM,EDNRA
GO:BP	regulation of tube diameter	GO:0035296	0.00232653	2.63329	166	1390	25	27543	MGLL,ATP2B1,APLN,ADORA1,ADRA1B,EXT1,PTK2,DOCK4,ADRA2C,PDE5A,ADRB1,ZDHHC21,SMPD3,PPARD,RAP1GDS1,PTGS2,ARHGAP42,TRPM4,ATP1A2,HTR1B,ADRA1A,EGFR,EDNRB,ADM,EDNRA
GO:BP	positive regulation of Wnt signaling pathway	GO:0030177	0.00233313	2.63206	134	1390	22	27543	SMAD3,FGF9,LYPD6,LRRK2,CSNK1G2,PLEKHA4,PIN1,SRC,RBPJ,FAM53B,TMEM198,TBL1XR1,TRPM4,NKD1,PTK7,FZD9,LGR4,RSPO2,EGFR,YAP1,BMP2,SMARCA4
GO:BP	cellular response to insulin stimulus	GO:0032869	0.00239116	2.62139	223	1390	30	27543	PLCB1,PRKCB,ATP2B1,AKT2,MYO5A,INPPL1,PRKCZ,PIP4K2C,CPEB2,APC,SRC,ESRRA,ZBTB7B,RAB31,SLC39A14,GPT,IGF1R,SOCS3,PCSK9,TRIM72,SORL1,PDPK1,GPAM,OSBPL8,AKT3,PIK3R2,SMARCC1,PTPRF,INSIG1,GPR21
GO:BP	positive regulation of secretion by cell	GO:1903532	0.00239288	2.62108	346	1390	40	27543	SNAP25,CACNA1I,APLN,EXPH5,CDK5R2,STX1B,OLFR78,RAPGEF4,MYRIP,SYT1,MYO18A,ADAM9,APBB1,STXBP1,CACNB4,MAPK9,RAB15,CNR1,RASL10B,ADRB1,SMPD3,CXCL12,PPARD,ARRB1,PPARG,PRKCE,IL4RA,UNC13A,TRPM4,MYH10,KISS1,RBP4,UNC13B,HTR6,SLC4A8,EGFR,BMP2,RGCC,SYK,CRH
GO:BP	negative regulation of protein kinase activity	GO:0006469	0.00242907	2.61456	200	1390	28	27543	HEG1,DUSP7,DAB2IP,INPPL1,DUSP1,ADARB1,PRKAR1B,PTPRT,SRCIN1,PTPRB,APC,PLEC,HIPK3,TRIB1,PKIG,ZFYVE28,DUSP3,MLLT1,PTPRJ,MAPK8IP1,SPRED1,SORL1,PDPK1,SPRY2,WWTR1,DUSP22,DEPTOR,BMP2
GO:BP	regulation of neuron differentiation	GO:0045664	0.00244002	2.61261	235	1390	31	27543	NBL1,TRPC6,BRINP1,BRINP2,CNTN4,GPR37L1,HSPA1B,LRRK2,TLE6,HES3,APBB1,ADRA2C,MIB1,FOXO3,DAB1,CXCL12,NREP,NUMB,GLI3,ASCL1,ARHGEF2,SOX5,GDPD5,MEF2C,EDNRB,MED1,SOX9,ZFHX2,BMP2,BDNF,NOTCH1
GO:BP	stress-activated MAPK cascade	GO:0051403	0.00244002	2.61261	235	1390	31	27543	PLCB1,SMAD3,DAB2IP,DUSP1,RASSF2,RASGRP1,LRRK2,SIRPA,PTK2,MAPK9,HIPK3,TRIB1,IGFBP6,TNFRSF19,RB1CC1,MAPK14,DUSP3,DLG1,MAPK8IP1,PER1,IGF1R,STRADB,MAP3K10,EGFR,WNT7B,MAPK11,HIPK2,DUSP22,EPHB1,BMP2,HGF
GO:BP	regulation of protein-containing complex assembly	GO:0043254	0.00249312	2.60326	425	1390	46	27543	GIT1,ASAP1,PAK1,CYFIP2,FMN1,PPP1R9A,DAB2IP,STX1B,SPTBN2,TFRC,HSPA1B,PRRT2,DMTN,SPTB,LCAT,LMO4,PRKCZ,FERMT2,STXBP1,NAV3,MAPK9,BAIAP2,TPM1,NAPA,SRC,PRKCE,PSRC1,TTBK1,UNC13A,DLG1,MTPN,OPRD1,FNIP1,UNC13B,SORL1,ARHGEF2,PIK3R2,CAMSAP1,TWF2,FSCN1,BRK1,ADD2,SLIT2,SOX9,ESAM,SYK
GO:BP	hematopoietic or lymphoid organ development	GO:0048534	0.0025303	2.59683	1016	1390	87	27543	PLCB1,FBXW7,ZFPM1,WNT4,BAP1,HERC6,CAMK4,CRIP2,PPP3CA,TYRO3,RORA,IL11RA1,PTN,MPL,TFRC,SSBP3,RASSF2,HSPA1B,DMTN,RASGRP1,EXT1,ZBTB16,TESC,ZMIZ1,SIRPA,LMO4,PRKCZ,MERTK,MYO1E,TTC7,IL12A,POU2F2,CACNB4,ANK1,PTPRZ1,ETV6,FOXO3,SMPD3,SRC,RBPJ,TRIB1,NFE2L1,ZBTB7A,IL4RA,EPAS1,MAPK14,ENTPD7,CEBPA,ESRRA,ZBTB7B,PREX1,EGR1,PIM1,MELK,FOXP1,LMO2,GAS2L1,ACTN1,FZD9,ZBTB1,FNIP1,SRF,FASN,GLI3,MKNK2,AXL,INPP5D,KITL,SOX…
GO:BP	protein localization to extracellular region	GO:0071692	0.00259628	2.58565	386	1390	43	27543	NBL1,PPP3CA,EXPH5,CDK16,MYO5A,OLFR78,RAPGEF4,MYRIP,DMTN,EFNA5,MYO18A,ADAM9,BRSK2,APBB1,SRCIN1,IL12A,CNR1,NR1D1,ADRB1,PDE8B,PCLO,PPARD,ARRB1,PPARG,STXBP5L,KCNJ11,PRKCE,CPLX1,ACVR1C,TRPM4,MYH10,AKAP5,RBP4,UNC13B,RAB3C,EGFR,EDNRB,CYB5R4,RAB11FIP3,DRD4,ABCC8,RFX3,CRH
GO:BP	peptidyl-tyrosine modification	GO:0018212	0.00259628	2.58565	386	1390	43	27543	TTL,FBXW7,DLG4,ADORA1,TYRO3,ERBB4,DMTN,CADM4,EFNA5,PRKCZ,MERTK,PTK2,SRCIN1,FGFR3,IL12A,HBEGF,PTPRZ1,PTPN4,RELN,SRC,HIPK3,PRKCE,TTBK1,NTRK2,LRP4,ZFYVE28,EPHA8,MELK,NTRK3,AXL,IGF1R,SOCS3,KITL,CD44,ARHGEF2,ADRA1A,EGFR,HIPK2,DUSP22,EPHB1,NEURL1A,HGF,SYK
GO:BP	negative regulation of organelle organization	GO:0010639	0.00259868	2.58525	360	1390	41	27543	MAP6D1,TRIM37,BOK,S1PR1,TBC1D30,PPP1R9A,SHANK1,SPTBN2,MAP1A,DUSP1,TFRC,PRRT2,DMTN,SHANK3,SPTB,LRRK2,CTNNA2,NAV3,TPM1,SWAP70,APC,CLEC16A,SRC,TOM1L2,RPS6KA2,CORO2B,MTPN,GAS2L1,TMEM14A,FZD9,ARHGEF2,PPARGC1A,TRIM54,CAMSAP1,TWF2,RAD1,ADD2,SLIT2,YAP1,HGF,RHPN1
GO:BP	regulation of tube size	GO:0035150	0.0026068	2.58389	167	1390	25	27543	MGLL,ATP2B1,APLN,ADORA1,ADRA1B,EXT1,PTK2,DOCK4,ADRA2C,PDE5A,ADRB1,ZDHHC21,SMPD3,PPARD,RAP1GDS1,PTGS2,ARHGAP42,TRPM4,ATP1A2,HTR1B,ADRA1A,EGFR,EDNRB,ADM,EDNRA
GO:BP	regulation of postsynaptic specialization assembly	GO:0099150	0.00272783	2.56418	18	1390	8	27543	SIPA1L1,ARHGEF9,NRXN1,PTPRD,NUMB,NTRK3,PTPRS,NPTX1
GO:BP	positive regulation of protein localization to cell periphery	GO:1904377	0.00274714	2.56112	68	1390	15	27543	NRXN1,DPP10,MYO5A,RAMP3,PPP1R9B,CACNG2,KCNJ11,ZDHHC2,LRP1,AKAP5,DLG1,ACSL3,PDPK1,STAC3,EGFR
GO:BP	negative regulation of transmembrane receptor protein serine/threonine kinase signaling pathway	GO:0090101	0.00277707	2.55641	125	1390	21	27543	NBL1,CHRDL1,BMPER,VASN,HTRA1,PIN1,RASL11B,ZBTB7A,MAGI2,ENG,PEG10,SPRED1,SORL1,PDPK1,SPRY2,PPARA,ADAMTSL2,DACT2,HIPK2,BMP2,NOTCH1
GO:BP	striated muscle hypertrophy	GO:0014897	0.00278835	2.55465	105	1390	19	27543	SMAD3,SORBS2,CAMTA2,PPP3CA,FBXO32,PTK2,PDE5A,PIN1,ADRB1,PPARG,FOXP1,MTPN,MYH7,RYR2,PPARA,ADRA1A,MEF2C,AKAP6,NOTCH1
GO:BP	regulation of MAP kinase activity	GO:0043405	0.00280303	2.55237	190	1390	27	27543	DUSP7,PAK1,DAB2IP,INPPL1,DUSP1,RASGRP1,LRRK2,ADAM9,PDE5A,SRC,HIPK3,TRIB1,PTPRJ,MAPK8IP1,NTRK3,MAP3K10,KITL,SORL1,SPRY2,DVL3,MEF2C,EGFR,FZD10,DRD4,BMP2,SYK,ADAM8
GO:BP	positive regulation of protein serine/threonine kinase activity	GO:0071902	0.00289035	2.53905	225	1390	30	27543	PAK1,NRXN1,CDK5R2,DAB2IP,INCENP,RASGRP1,LRRK2,ADAM9,FERMT2,PDE5A,SRC,CDK5R1,PSRC1,PIM1,NTRK3,MAP3K10,KITL,SPRY2,SLC8A2,DVL3,MEF2C,EGFR,AKAP6,FZD10,FAM20A,DRD4,BMP2,RGCC,SYK,ADAM8
GO:BP	circadian rhythm	GO:0007623	0.00293191	2.53285	237	1390	31	27543	FBXW7,KCNA2,ADCY1,ADORA1,RORA,CRY2,HOMER1,BHLHE40,CIPC,MAPK9,NR1D1,ADRB1,USP2,CRTC1,NTRK2,NR2F6,EGR1,KLF9,CORT,PER1,NTRK3,LGR4,PPARGC1A,PPARA,ATF4,EGFR,NR1D2,KLF10,NRIP1,DRD4,BDNF
GO:BP	protein localization to postsynaptic specialization membrane	GO:0099633	0.00293497	2.5324	30	1390	10	27543	GIT1,DLG4,IQSEC2,RAPGEF4,PRKCZ,CACNG2,MAGI2,DLG1,ADAM22,NPTX1
GO:BP	neurotransmitter receptor localization to postsynaptic specialization membrane	GO:0099645	0.00293497	2.5324	30	1390	10	27543	GIT1,DLG4,IQSEC2,RAPGEF4,PRKCZ,CACNG2,MAGI2,DLG1,ADAM22,NPTX1
GO:BP	kidney development	GO:0001822	0.00294294	2.53122	336	1390	39	27543	SMAD3,WNT4,WFS1,PLXND1,PPP3CA,FMN1,GCNT4,ERBB4,BMPER,EXT1,ZBTB16,LRRK2,MYO1E,LRP4,MAGI2,EGR1,DLG1,PODXL,PTK7,GLI3,CALB1,LGR4,PCSK9,MEF2C,EDNRB,DACT2,WNT7B,ADAMTS1,WWTR1,SLIT2,YAP1,AQP11,SCHIP1,SOX9,BMP2,BDNF,RHPN1,NOTCH1,EDNRA
GO:BP	protein autophosphorylation	GO:0046777	0.00321084	2.49338	238	1390	31	27543	CAMKK2,GFRA2,NLK,CALM1,PAK1,LMTK2,TYRO3,OBSCN,ERBB4,RASSF2,LRRK2,PTK2,CSNK1G2,FGFR3,SRC,MAP3K9,NTRK2,RB1CC1,MAPK14,EPHA8,PIM1,CDKL5,MELK,ENG,MKNK2,TNKS1BP1,IGF1R,EGFR,GRK5,EPHB1,SYK
GO:BP	ear development	GO:0043583	0.00321084	2.49338	238	1390	31	27543	WHRN,ATP2B2,FGF9,MAF,BMPER,GABRB2,CXCL14,H2-T23,FZD3,ESRRB,FRZB,RBPJ,CEBPA,KCNK2,PTK7,GLI3,CALB1,NTRK3,SPRY2,DVL3,CTHRC1,TRIOBP,ATP8B1,KCNK3,ALDH1A3,SOX9,BMP2,BDNF,INSIG1,NOTCH1,EDNRA
GO:BP	transmission of nerve impulse	GO:0019226	0.003325	2.47821	87	1390	17	27543	KCNA2,KCNA1,CACNA1I,S1PR1,CNTNAP1,RAPGEF4,SCN1B,NRCAM,CACNG2,CACNB4,PLEC,NTRK2,CACNA1A,NTRK3,FMR1,ANK3,NFASC
GO:BP	cardiac muscle tissue morphogenesis	GO:0055008	0.0033475	2.47528	69	1390	15	27543	ZFPM1,LY6E,TNNC1,HEG1,MYBPC3,S1PR1,TPM1,RBPJ,ENG,MYH7,RYR2,MED1,BMP2,NOTCH1,EDNRA
GO:BP	regulation of action potential	GO:0098900	0.0033475	2.47528	69	1390	15	27543	CALM1,CACNB3,RAPGEF4,CNR1,HCN1,TRPM4,FOXP1,DLG1,RYR2,CACNA2D1,FMR1,SLC8A2,ADRA1A,ANK2,ANK3
GO:BP	glycerolipid metabolic process	GO:0046486	0.00341271	2.4669	390	1390	43	27543	MGLL,PLCB1,DGKZ,TTC7B,ETNK2,PIP5K1C,ABHD6,LPCAT4,PIP5K1B,INPPL1,LPGAT1,DAGLB,CDS1,PLCH2,LCAT,THRSP,PI4KA,ACSL6,AGPAT3,PIGZ,PIP4K2C,TTC7,INPP4A,ABHD2,ABHD8,TBL1XR1,PGS1,FAM126B,ACSL3,DGAT2L6,LIPG,INPP5D,ABHD3,SOCS3,PCSK9,SORL1,GPAM,PLA2G5,MTMR12,PIK3R2,DGKI,SLA2,INSIG1
GO:BP	regulation of protein kinase B signaling	GO:0051896	0.00357128	2.44718	181	1390	26	27543	GRM2,NRXN1,OTUD3,RAMP3,PTK2,FERMT2,HBEGF,CXCL12,SRC,NTRK2,TSPYL5,MAGI2,DLG1,ENG,PTPRJ,DDIT3,NTRK3,AXL,OSBPL8,SPRY2,PPARA,EGFR,GCNT2,THPO,HPSE,ADAM8
GO:BP	adult locomotory behavior	GO:0008344	0.00362074	2.4412	97	1390	18	27543	GLRB,PREX2,GRIN1,CACNB4,LGI4,KCNJ10,DAB1,CXCL12,CACNA1A,OXR1,OPRD1,ATP1A2,SHANK2,ADAM22,AGTPBP1,HIPK2,DRD4,SEZ6L
GO:BP	positive regulation of cell morphogenesis involved in differentiation	GO:0010770	0.00362074	2.4412	97	1390	18	27543	CUX2,MPL,PTPRD,DMTN,FBXO31,FERMT2,MAPK9,TBC1D24,BAIAP2,RELN,PREX1,AKAP5,CDKL5,NUMB,STAU2,TRIOBP,PTPRF,HPSE
GO:BP	protein secretion	GO:0009306	0.00368799	2.43321	378	1390	42	27543	PPP3CA,EXPH5,CDK16,MYO5A,OLFR78,RAPGEF4,MYRIP,DMTN,EFNA5,MYO18A,ADAM9,BRSK2,APBB1,SRCIN1,IL12A,CNR1,NR1D1,ADRB1,PDE8B,PCLO,PPARD,ARRB1,PPARG,STXBP5L,KCNJ11,PRKCE,CPLX1,ACVR1C,TRPM4,MYH10,AKAP5,RBP4,UNC13B,RAB3C,EGFR,EDNRB,CYB5R4,RAB11FIP3,DRD4,ABCC8,RFX3,CRH
GO:BP	positive regulation of protein localization to plasma membrane	GO:1903078	0.00374678	2.42634	61	1390	14	27543	NRXN1,DPP10,MYO5A,RAMP3,PPP1R9B,KCNJ11,ZDHHC2,LRP1,AKAP5,DLG1,ACSL3,PDPK1,STAC3,EGFR
GO:BP	substrate adhesion-dependent cell spreading	GO:0034446	0.00375292	2.42563	107	1390	19	27543	TYRO3,ATRNL1,DMTN,EFNA5,MEGF9,ACTN4,MERTK,PTK2,FERMT2,SRCIN1,LAMB3,SRC,NTNG2,PREX1,ITGAV,AXL,TRIOBP,RCC2,HPSE
GO:BP	muscle hypertrophy	GO:0014896	0.00375292	2.42563	107	1390	19	27543	SMAD3,SORBS2,CAMTA2,PPP3CA,FBXO32,PTK2,PDE5A,PIN1,ADRB1,PPARG,FOXP1,MTPN,MYH7,RYR2,PPARA,ADRA1A,MEF2C,AKAP6,NOTCH1
GO:BP	response to oxygen levels	GO:0070482	0.0037646	2.42428	418	1390	45	27543	SMAD3,ITPR1,ADORA1,RORA,VASN,MPL,TFRC,RYR1,ACTN4,CPEB2,FOXO3,PIN1,DIO3,CXCL12,PYGM,PPARD,SRC,PPARG,RBPJ,CPEB4,PRKCE,EPAS1,PTGS2,EGR1,KCNK2,MYOD1,OPRD1,ENG,ACVRL1,SRF,VHL,RYR2,PDLIM1,PPARA,ATF4,ITPR2,ALAS2,KCNK3,ADM,BMP2,RGCC,NOTCH1,EDNRA,ADAM8,FOSL2
GO:BP	ovulation cycle	GO:0042698	0.003929	2.40572	88	1390	17	27543	TYRO3,PTN,FOXO3,PGR,ARRB1,SRC,EGR1,KISS1,NCOR2,AXL,IGF1R,EGFR,ADAMTS1,SLIT2,NRIP1,SCHIP1,INHBA
GO:BP	establishment of protein localization to extracellular region	GO:0035592	0.00394958	2.40345	379	1390	42	27543	PPP3CA,EXPH5,CDK16,MYO5A,OLFR78,RAPGEF4,MYRIP,DMTN,EFNA5,MYO18A,ADAM9,BRSK2,APBB1,SRCIN1,IL12A,CNR1,NR1D1,ADRB1,PDE8B,PCLO,PPARD,ARRB1,PPARG,STXBP5L,KCNJ11,PRKCE,CPLX1,ACVR1C,TRPM4,MYH10,AKAP5,RBP4,UNC13B,RAB3C,EGFR,EDNRB,CYB5R4,RAB11FIP3,DRD4,ABCC8,RFX3,CRH
GO:BP	regulation of cardiac muscle hypertrophy	GO:0010611	0.00406299	2.39115	70	1390	15	27543	SMAD3,PPP3CA,FBXO32,PTK2,PDE5A,PIN1,ADRB1,PPARG,FOXP1,MTPN,PPARA,ADRA1A,MEF2C,AKAP6,NOTCH1
GO:BP	negative regulation of protein depolymerization	GO:1901880	0.00410067	2.38715	79	1390	16	27543	MAP6D1,SPTBN2,MAP1A,DMTN,SPTB,NAV3,TPM1,SWAP70,APC,MTPN,GAS2L1,ARHGEF2,TRIM54,CAMSAP1,TWF2,ADD2
GO:BP	cerebellar Purkinje cell layer development	GO:0021680	0.0042174	2.37495	38	1390	11	27543	WHRN,ATP2B2,RORA,SPTBN2,CACNA1A,MYH10,B4GALT2,HERC1,NFIX,AGTPBP1,SEZ6L
GO:BP	ephrin receptor signaling pathway	GO:0048013	0.0042174	2.37495	38	1390	11	27543	SIPA1L1,GIT1,EFNA5,PTK2,CDK5R1,RBPJ,EPHA8,NTRK3,ANKS1,EPHB1,NOTCH1
GO:BP	cellular response to peptide	GO:1901653	0.00425954	2.37064	367	1390	41	27543	PLCB1,PRKCB,ATP2B1,AKT2,MYO5A,INPPL1,PPP1R9B,PRKCZ,PIP4K2C,PTK2,CPEB2,FOXO3,APC,SMPD3,SRC,ESRRA,ZBTB7B,CACNA1A,MAS1,RAB31,CYP11A1,SLC39A14,GPT,IGF1R,SOCS3,PCSK9,TRIM72,SORL1,ARHGEF2,PDPK1,GPAM,OSBPL8,CACNA2D1,AKT3,PIK3R2,CACNB1,SMARCC1,PTPRF,INSIG1,EDNRA,GPR21
GO:BP	peptidyl-threonine phosphorylation	GO:0018107	0.0042974	2.36679	118	1390	20	27543	NLK,PRKCB,TRPC6,LMTK2,DMTN,CADM4,LRRK2,PRKCA,CDK5R1,HIPK3,TTBK1,CDC42BPA,TNKS1BP1,SPRED1,MAP3K10,PDPK1,ROCK2,AKT3,SPRY2,HIPK2
GO:BP	regulation of cell projection assembly	GO:0060491	0.00486071	2.3133	207	1390	28	27543	KCTD17,ZMYND8,NRXN1,TBC1D30,PPP1R9A,SYNE1,DMTN,ATMIN,HDAC4,APC,SRC,EPS8L2,CDKL5,HTT,PODXL,SRF,ARHGAP35,STAU2,FMR1,AUTS2,TWF2,FSCN1,ATP8B1,RCC2,BRK1,SLIT2,YAP1,NEURL1A
GO:BP	regulation of extent of cell growth	GO:0061387	0.00492326	2.30775	119	1390	20	27543	MGLL,TTL,OLFM1,RTN4R,FSTL4,EFNA5,CXCL12,DIP2B,CDK5R1,PLXNA4,CDKL5,SRF,NTRK3,TWF2,PTPRS,TNFRSF12A,SEMA3G,SLIT2,DSCAM,BDNF
GO:BP	regulation of transforming growth factor beta receptor signaling pathway	GO:0017015	0.00492326	2.30775	119	1390	20	27543	SMAD3,ZFP703,VASN,HTRA1,PIN1,NREP,RASL11B,GIPC1,ZBTB7A,ENG,PEG10,LRG1,SPRED1,SNW1,PDPK1,SPRY2,PPARA,ADAMTSL2,HIPK2,BMP2
GO:BP	hindbrain morphogenesis	GO:0021575	0.00494829	2.30554	54	1390	13	27543	WHRN,ATP2B2,RORA,NRXN1,SPTBN2,HES3,ZFP365,DAB1,CACNA1A,MTPN,HERC1,NFIX,AGTPBP1
GO:BP	negative regulation of cytoskeleton organization	GO:0051494	0.00504877	2.29681	173	1390	25	27543	MAP6D1,TRIM37,S1PR1,PPP1R9A,SHANK1,SPTBN2,MAP1A,DMTN,SHANK3,SPTB,CTNNA2,NAV3,TPM1,SWAP70,APC,CORO2B,MTPN,GAS2L1,ARHGEF2,TRIM54,CAMSAP1,TWF2,ADD2,SLIT2,RHPN1
GO:BP	protein homooligomerization	GO:0051260	0.00516257	2.28713	196	1390	27	27543	LZTS3,KCTD1,KCTD17,KCNC1,KCNA2,KCNA1,ARC,KCTD15,RYR1,GLS,SLC1A2,KCTD6,KCNJ12,HCN1,CRTC1,TRPM4,MPP2,ZBTB1,KCNS2,PEG10,NACC2,TRIM72,ASIC1,AQP4,SIGMAR1,ALDH1A3,AQP11
GO:BP	peptidyl-tyrosine phosphorylation	GO:0018108	0.00517833	2.28581	383	1390	42	27543	FBXW7,DLG4,ADORA1,TYRO3,ERBB4,DMTN,CADM4,EFNA5,PRKCZ,MERTK,PTK2,SRCIN1,FGFR3,IL12A,HBEGF,PTPRZ1,PTPN4,RELN,SRC,HIPK3,PRKCE,TTBK1,NTRK2,LRP4,ZFYVE28,EPHA8,MELK,NTRK3,AXL,IGF1R,SOCS3,KITL,CD44,ARHGEF2,ADRA1A,EGFR,HIPK2,DUSP22,EPHB1,NEURL1A,HGF,SYK
GO:BP	regulation of ossification	GO:0030278	0.00534865	2.27176	130	1390	21	27543	SMAD3,WNT4,PHOSPHO1,GPM6B,ATP2B1,S1PR1,PTN,ZBTB16,EGR2,RBPJ,DHRS3,LRP4,MAPK14,ESRRA,TRPM4,FZD9,BCOR,MEF2C,SOX9,BMP2,NOTCH1
GO:BP	osteoblast differentiation	GO:0001649	0.00545946	2.26285	220	1390	29	27543	SMAD3,WNT4,FGF9,PPP3CA,RASSF2,PTK2,FERMT2,HDAC4,HIRA,MEF2D,MAPK14,CEBPA,ESRRA,TRPM4,GLI3,LGR4,ATF4,AXIN2,RSPO2,CTHRC1,MEF2C,WNT7B,WWTR1,MAPK11,YAP1,SOX9,BMP2,FHL2,NOTCH1
GO:BP	skeletal muscle fiber development	GO:0048741	0.00560696	2.25127	39	1390	11	27543	PPP3CA,CNTNAP1,RYR1,HOMER1,HDAC4,PLEC,ACTA1,MYOD1,STAC3,KLHL40,XK
GO:BP	nephron epithelium development	GO:0072009	0.00563081	2.24943	120	1390	20	27543	WNT4,FMN1,EXT1,MYO1E,MAGI2,DLG1,PODXL,GLI3,CALB1,LGR4,MEF2C,EDNRB,WNT7B,WWTR1,YAP1,AQP11,SOX9,BMP2,NOTCH1,EDNRA
GO:BP	neurotransmitter receptor internalization	GO:0099590	0.00574513	2.2407	32	1390	10	27543	SNAP25,PACSIN1,ARC,PIP5K1C,IQSEC1,PPP3R1,CACNG2,AKAP5,NUMB,DRD4
GO:BP	regulation of cellular response to insulin stimulus	GO:1900076	0.00591788	2.22783	72	1390	15	27543	PRKCB,ATP2B1,MYO5A,INPPL1,PRKCZ,PIP4K2C,SRC,ESRRA,ZBTB7B,SOCS3,TRIM72,SORL1,OSBPL8,PTPRF,GPR21
GO:BP	retina morphogenesis in camera-type eye	GO:0060042	0.00591788	2.22783	72	1390	15	27543	MAN2A1,FJX1,PTN,MEGF11,DIO3,HCN1,FAT3,NTRK2,RBP4,SDK1,CALB1,SDK2,HIPK2,SOX9,DSCAM
GO:BP	phospholipid metabolic process	GO:0006644	0.00600082	2.22179	372	1390	41	27543	PLCB1,DGKZ,TTC7B,ETNK2,PIP5K1C,ABHD6,ERBB4,LPCAT4,PIP5K1B,INPPL1,LPGAT1,CDS1,PLCH2,LCAT,PI4KA,ACSL6,AGPAT3,PIGZ,PIP4K2C,TTC7,SMPD3,INPP4A,PPARD,ABHD8,PGS1,FAM126B,ACSL3,INPP5D,ABHD3,SOCS3,PCSK9,GPAM,PLA2G5,MTMR12,PIK3R2,SAMD8,DGKI,SLA2,IDI1,PLA2G4B,MVD
GO:BP	protein-containing complex disassembly	GO:0032984	0.00600864	2.22122	233	1390	30	27543	MAP6D1,CALM1,SMARCD1,SPTBN2,MAP1A,UBQLN4,DMTN,SPTB,PPP1R9B,NAV3,MICAL2,TPM1,SWAP70,APC,NAPA,CLEC16A,SH3BP1,ATG12,MTPN,GAS2L1,IGF1R,MICAL3,ARHGEF2,TRIM54,CAMSAP1,TWF2,SMARCC1,NES,ADD2,SMARCA4
GO:BP	neuronal action potential propagation	GO:0019227	0.00685717	2.16385	10	1390	6	27543	CNTNAP1,SCN1B,NRCAM,CACNB4,NTRK2,NTRK3
GO:BP	action potential propagation	GO:0098870	0.00685717	2.16385	10	1390	6	27543	CNTNAP1,SCN1B,NRCAM,CACNB4,NTRK2,NTRK3
GO:BP	muscle tissue morphogenesis	GO:0060415	0.00688027	2.16239	82	1390	16	27543	ZFPM1,LY6E,TNNC1,HEG1,MYBPC3,S1PR1,ADARB1,TPM1,RBPJ,ENG,MYH7,RYR2,MED1,BMP2,NOTCH1,EDNRA
GO:BP	cerebral cortex radial glia-guided migration	GO:0021801	0.00704901	2.15187	26	1390	9	27543	CDK5R2,DAB2IP,ZMIZ1,SUN1,DAB1,RELN,CDK5R1,SUN2,GLI3
GO:BP	telencephalon glial cell migration	GO:0022030	0.00704901	2.15187	26	1390	9	27543	CDK5R2,DAB2IP,ZMIZ1,SUN1,DAB1,RELN,CDK5R1,SUN2,GLI3
GO:BP	regulation of cartilage development	GO:0061035	0.00710338	2.14854	73	1390	15	27543	SMAD3,WNT9A,MAF,ZBTB16,SMPD3,FRZB,SCX,GLI3,SOX5,SOX6,AXIN2,BMP1,SOX9,BMP2,PTHLH
GO:BP	regulation of muscle hypertrophy	GO:0014743	0.00710338	2.14854	73	1390	15	27543	SMAD3,PPP3CA,FBXO32,PTK2,PDE5A,PIN1,ADRB1,PPARG,FOXP1,MTPN,PPARA,ADRA1A,MEF2C,AKAP6,NOTCH1
GO:BP	peripheral nervous system development	GO:0007422	0.00710338	2.14854	73	1390	15	27543	AKT2,CNTNAP1,PPP3R1,LGI4,PLEC,EGR2,PLXNA4,NTRK2,NEFH,NTRK3,ADAM22,EDNRB,ETV1,NFASC,BDNF
GO:BP	cardiac ventricle development	GO:0003231	0.00713239	2.14676	143	1390	22	27543	ZFPM1,LY6E,TNNC1,HEG1,FGF9,MYBPC3,LUZP1,LMO4,FGFRL1,TPM1,RBPJ,KCNK2,ENG,PTK7,MYH7,RYR2,MEF2C,MED1,SLIT2,SMARCA4,NOTCH1,EDNRA
GO:BP	calcium ion-regulated exocytosis of neurotransmitter	GO:0048791	0.0071718	2.14437	20	1390	8	27543	SNAP25,RIMS3,STX1B,SYT1,STXBP1,UNC13A,CACNA1A,UNC13B
GO:BP	negative regulation of kinase activity	GO:0033673	0.00718215	2.14375	223	1390	29	27543	HEG1,DUSP7,DAB2IP,INPPL1,DUSP1,ADARB1,PRKAR1B,PIP4K2C,PTPRT,SRCIN1,PTPRB,APC,PLEC,HIPK3,TRIB1,PKIG,ZFYVE28,DUSP3,MLLT1,PTPRJ,MAPK8IP1,SPRED1,SORL1,PDPK1,SPRY2,WWTR1,DUSP22,DEPTOR,BMP2
GO:BP	regulation of cellular response to transforming growth factor beta stimulus	GO:1903844	0.00732958	2.13492	122	1390	20	27543	SMAD3,ZFP703,VASN,HTRA1,PIN1,NREP,RASL11B,GIPC1,ZBTB7A,ENG,PEG10,LRG1,SPRED1,SNW1,PDPK1,SPRY2,PPARA,ADAMTSL2,HIPK2,BMP2
GO:BP	regulation of dopamine secretion	GO:0014059	0.00738198	2.13183	40	1390	11	27543	GRM2,PRKCB,KCNA2,MYO5A,SYT1,SYT12,CNR1,CXCL12,SYT13,HTR1B,HTR6
GO:BP	dopamine secretion	GO:0014046	0.00738198	2.13183	40	1390	11	27543	GRM2,PRKCB,KCNA2,MYO5A,SYT1,SYT12,CNR1,CXCL12,SYT13,HTR1B,HTR6
GO:BP	regulation of epithelial to mesenchymal transition	GO:0010717	0.00746276	2.1271	92	1390	17	27543	SMAD3,ZFP703,OLFM1,DAB2IP,VASN,DACT3,FERMT2,ENG,LRG1,SPRED1,SPRY2,AXIN2,GCNT2,WWTR1,BMP2,RGCC,NOTCH1
GO:BP	positive regulation of axonogenesis	GO:0050772	0.00746276	2.1271	92	1390	17	27543	PLXND1,EFNA5,CXCL12,TRAK1,PLXNA4,NTRK2,CDKL5,SRF,SLITRK1,NTRK3,METRN,PLXNB1,TWF2,TNFRSF12A,AMIGO1,DSCAM,BDNF
GO:BP	regulation of protein localization to plasma membrane	GO:1903076	0.00762261	2.1179	112	1390	19	27543	NRXN1,DPP10,MYO5A,RAMP3,PPP1R9B,KCNJ11,ZDHHC2,LRP1,AKAP5,DLG1,NUMB,ACSL3,LYPD1,DDI2,PDPK1,PIK3R2,STAC3,EGFR,VTI1B
GO:BP	blood vessel endothelial cell migration	GO:0043534	0.00762261	2.1179	112	1390	19	27543	FBXW7,PRKCA,SH3BP1,PTGS2,ACVRL1,SRF,VHL,SPRED1,PDPK1,AKT3,PIK3R2,MEF2C,PRCP,SOX18,SLIT2,RGCC,NOTCH1,MYH9,ADAM8
GO:BP	actin polymerization or depolymerization	GO:0008154	0.00763189	2.11737	200	1390	27	27543	CYFIP2,FMN1,PPP1R9A,SPIRE1,SPTBN2,DMTN,SPTB,PPP1R9B,FAM107A,MICAL2,BAIAP2,TPM1,SWAP70,CIT,PRKCE,SH3BP1,DLG1,MTPN,ARHGAP35,MICAL3,PIK3R2,TWF2,BRK1,ADD2,SLIT2,PSTPIP2,ESAM
GO:BP	cell differentiation involved in kidney development	GO:0061005	0.00768095	2.11459	56	1390	13	27543	WNT4,EXT1,MYO1E,MAGI2,PODXL,GLI3,LGR4,MEF2C,EDNRB,WWTR1,YAP1,NOTCH1,EDNRA
GO:BP	retina development in camera-type eye	GO:0060041	0.00769326	2.11389	177	1390	25	27543	ATP2B2,ATP2B1,MAN2A1,FJX1,PTN,MEGF11,MERTK,DIO3,TUB,HCN1,FAT3,NTRK2,CLCN2,MYH10,RBP4,ACVRL1,SDK1,CALB1,SDK2,MED1,AGTPBP1,HIPK2,SOX9,DSCAM,SMARCA4
GO:BP	organic acid transport	GO:0015849	0.00804894	2.09426	337	1390	38	27543	GRM2,SLC13A5,SFXN5,ADORA1,SLC6A1,AKT2,SLC1A3,SLC23A3,SLC25A18,SLC1A2,ACSL6,STXBP1,CACNB4,MAPK9,KCNJ10,PPARD,NFE2L1,NTRK2,MFSD12,SLC6A17,SLC36A1,GIPC1,CACNA1A,SLC25A22,ACSL3,CROT,PLA2G5,HTR1B,HTR6,LRRC8C,SLC38A3,ATP8B1,XK,SLC7A4,DRD4,BDNF,SLCO1C1,SYK
GO:BP	eye morphogenesis	GO:0048592	0.0085277	2.06917	178	1390	25	27543	MAN2A1,FJX1,PTN,E030003E18RIK,MEGF11,DIO3,HCN1,OLFM3,FAT3,NTRK2,RBP4,SDK1,GLI3,CALB1,VHL,STAU2,SDK2,ATF4,AGTPBP1,ALDH1A3,HIPK2,SOX9,EPHB1,DSCAM,BDNF
GO:BP	myeloid cell differentiation	GO:0030099	0.00853567	2.06876	431	1390	45	27543	PLCB1,FBXW7,ZFPM1,BAP1,CAMK4,PPP3CA,MPL,TFRC,RASSF2,HSPA1B,DMTN,ZBTB16,TESC,ANK1,FOXO3,SRC,RBPJ,TRIB1,NFE2L1,ZBTB7A,EPAS1,MAPK14,CEBPA,ESRRA,FOXP1,LMO2,GAS2L1,ACTN1,SRF,FASN,INPP5D,KITL,SOX6,SLC4A1,MEF2C,MED1,ALAS2,ITGB8,THPO,KLF10,BATF3,SMARCA4,MYH9,ADAM8,INHBA
GO:BP	regulation of sodium ion transport	GO:0002028	0.00870673	2.06014	93	1390	17	27543	PLCB1,PTPN3,ATP1A1,NETO2,AKT2,SCN1B,TESC,HECW1,ATP1B2,HECW2,MLLT6,ATP1A2,PER1,PCSK9,AKT3,ANK3,DRD4
GO:BP	smooth muscle contraction	GO:0006939	0.00873461	2.05876	113	1390	19	27543	ATP2B1,ADORA1,APBB1,DOCK4,ADRA2C,ADRB1,ZDHHC21,SMPD3,RAP1GDS1,PTGS2,ARHGAP42,DLG1,SRF,ATP1A2,ROCK2,ADRA1A,EDNRB,APBB2,EDNRA
GO:BP	regulation of cold-induced thermogenesis	GO:0120161	0.00879955	2.05554	134	1390	21	27543	DIO2,ABHD6,E030003E18RIK,ESRRG,NR1D1,ADRB1,RBPJ,IL4RA,EPAS1,ZBTB7B,NOVA1,DDIT3,TLE3,LGR4,PPARGC1A,ATF4,DYNC1H1,PTH2R,ACOT11,SYK,NOTCH1
GO:BP	negative regulation of neuron projection development	GO:0010977	0.00901347	2.04511	156	1390	23	27543	RAP1GAP2,RTN4R,FSTL4,STX1B,INPPL1,RTN4RL1,NTM,LRRK2,PTK2,PTPRZ1,ZFP365,SYNGAP1,DAB1,DIP2B,CDK5R1,FAT3,LRP4,RTN4RL2,CBFA2T2,PTPRS,SEMA3G,SLIT2,NEU4
GO:BP	immune system development	GO:0002520	0.00911755	2.04012	1080	1390	89	27543	PLCB1,FBXW7,ZFPM1,SMAD3,WNT4,BAP1,HERC6,CAMK4,CRIP2,PPP3CA,TYRO3,RORA,IL11RA1,PTN,MPL,TFRC,SSBP3,RASSF2,HSPA1B,DMTN,RASGRP1,EXT1,ZBTB16,TESC,ZMIZ1,SIRPA,LMO4,PRKCZ,MERTK,MYO1E,TTC7,IL12A,POU2F2,CACNB4,ANK1,PTPRZ1,ETV6,FOXO3,SWAP70,SMPD3,SRC,RBPJ,TRIB1,NFE2L1,ZBTB7A,IL4RA,EPAS1,MAPK14,ENTPD7,CEBPA,ESRRA,ZBTB7B,PREX1,EGR1,PIM1,MELK,FOXP1,LMO2,GAS2L1,ACTN1,FZD9,ZBTB1,FNIP1,SRF,FASN,GLI3,MKNK2,AXL,IN…
GO:BP	protein complex oligomerization	GO:0051259	0.00960502	2.0175	263	1390	32	27543	LZTS3,KCTD1,KCTD17,KCNC1,KCNA2,KCNA1,ARC,BOK,SYT1,KCTD15,RYR1,HOMER1,GLS,SLC1A2,KCTD6,GRIN1,KCNJ12,HCN1,CRTC1,TRPM4,MPP2,ZBTB1,KCNS2,PEG10,NACC2,TRIM72,LRRC8C,ASIC1,AQP4,SIGMAR1,ALDH1A3,AQP11
GO:BP	negative regulation of catabolic process	GO:0009895	0.00988421	2.00506	314	1390	36	27543	GIT1,SMAD3,PTPN3,GRIN2A,ADORA1,DAB2IP,MAP1A,UBQLN4,FOXK1,LRRK2,FOXK2,PTK2,HDAC4,CNR1,PIN1,AGAP2,CLEC16A,PKP1,GIPC1,HERC1,TIMP4,SORL1,PPARGC1A,FMR1,PPARA,AXIN2,QK,SLC4A1,ADRA1A,GRIN2C,EGFR,SMARCC1,ANKS1,HIPK2,AQP11,LZTS1
GO:BP	cold-induced thermogenesis	GO:0106106	0.00993123	2.003	135	1390	21	27543	DIO2,ABHD6,E030003E18RIK,ESRRG,NR1D1,ADRB1,RBPJ,IL4RA,EPAS1,ZBTB7B,NOVA1,DDIT3,TLE3,LGR4,PPARGC1A,ATF4,DYNC1H1,PTH2R,ACOT11,SYK,NOTCH1
GO:BP	stress fiber assembly	GO:0043149	0.00999119	2.00038	114	1390	19	27543	SMAD3,WNT4,PAK1,S1PR1,PHACTR1,PPP1R9A,ARHGEF10L,FERMT2,TPM1,ARRB1,SRC,CORO2B,SRF,FAM171A1,PDLIM1,ROCK2,PIK3R2,RGCC,RHPN1
GO:BP	contractile actin filament bundle assembly	GO:0030038	0.00999119	2.00038	114	1390	19	27543	SMAD3,WNT4,PAK1,S1PR1,PHACTR1,PPP1R9A,ARHGEF10L,FERMT2,TPM1,ARRB1,SRC,CORO2B,SRF,FAM171A1,PDLIM1,ROCK2,PIK3R2,RGCC,RHPN1
GO:BP	sensory perception of pain	GO:0019233	0.0101127	1.99513	146	1390	22	27543	MGLL,GRIN2A,KCNA2,KCNA1,ADORA1,CACNB3,KCNIP3,PRKAR1B,GRIN1,ADRA2C,KCNJ10,CNR1,ADRB1,CXCL12,NR2F6,PTGS2,CACNA1A,OPRD1,EDNRB,ZFHX2,EPHB1,EDNRA
GO:BP	positive regulation of synapse assembly	GO:0051965	0.0101292	1.99442	75	1390	15	27543	CUX2,LRTM2,SYNDIG1,NRXN1,PTPRD,CLSTN1,EFNA5,FLRT2,NTRK2,SLITRK1,NTRK3,STAU2,AMIGO1,EPHB1,BDNF
GO:BP	regulation of cell cycle	GO:0051726	0.0103984	1.98303	1037	1390	86	27543	TTL,PLCB1,DGKZ,GIT1,PTPN3,ZFP703,CALM1,WNT4,BAP1,BRINP1,WFS1,TRIM37,CCNG1,SENP2,CDK16,CDK5R2,DAB2IP,BRINP2,INCENP,DUSP1,CDK19,HSPA1B,ADARB1,FBXO31,FAM107A,RAB11FIP4,APBB1,FZD3,CACNB4,PRKCA,LSM11,MAPK12,PIN1,CIT,APC,SMPD3,SRC,CDK5R1,USP2,PRKCE,PSRC1,NFE2L1,TOM1L2,TTBK1,MADD,MAP9,GIPC1,RPS6KA2,MAPK14,PTGS2,HECW2,CEBPA,DUSP3,CABLES2,MAGI2,BRSK1,PIM1,CDKL5,DLG1,SMOC2,GAS2L1,FZD9,NACC2,ASCL1,IGF1R,ROC…
GO:BP	regulation of smooth muscle cell proliferation	GO:0048660	0.0104495	1.9809	180	1390	25	27543	FGF9,S1PR1,APLN,PTK2,HDAC4,IL12A,HBEGF,TPM1,NDRG2,SMPD3,PPARD,PPARG,TRIB1,MEF2D,PTGS2,EGR1,FOXP1,IGF1R,PPARGC1A,HTR1B,MEF2C,EGFR,ADAMTS1,DRD4,BMP2
GO:BP	neuron cellular homeostasis	GO:0070050	0.0106467	1.97279	34	1390	10	27543	ATP2B2,BAP1,ATP2B1,ADORA1,TYRO3,MAP1A,CACNA1A,CALB1,SLC8A2,HTR1B
GO:BP	receptor-mediated endocytosis	GO:0006898	0.0107601	1.96818	252	1390	31	27543	SNAP25,DLG4,PACSIN1,ARC,APLN,PIP5K1C,IQSEC1,TFRC,PPP3R1,RAMP3,ARR3,FCHO1,CACNG2,RAMP1,ARRB1,ANKRD13B,MAGI2,LRP1,AKAP5,ITGAV,RAB31,WASF1,NUMB,PCSK9,SORL1,FMR1,HTR1B,ADM,DRD4,ACKR3,SYK
GO:BP	cellular glucose homeostasis	GO:0001678	0.0108854	1.96316	192	1390	26	27543	HKDC1,PPP3CA,CDK16,FOXK1,EFNA5,FOXK2,BRSK2,GRIK5,FOXO3,NR1D1,PDE8B,PPARD,ARRB1,KCNJ11,PRKCE,TRPM4,SRF,UNC13B,SLC39A14,IGF1R,PIK3R2,AQP4,NPTX1,ABCC8,SMARCA4,CRH
GO:BP	regulation of response to external stimulus	GO:0032101	0.0109718	1.95972	946	1390	80	27543	MGLL,GIT1,SMAD3,ZNFX1,NBL1,WNT4,SEC14L1,BAP1,S1PR1,ADORA1,RTN4R,TYRO3,RORA,CACNB3,NRXN1,AKT2,PTN,DUSP1,DAGLB,CDK19,ASH1L,RTN4RL1,DMTN,RASGRP1,LRRK2,CXCL14,PTK2,CTNNA2,GRIN1,IL12A,HTRA1,PDE5A,METRNL,PRKCA,CNR1,SWAP70,NR1D1,CXCL12,PPARD,PPARG,TBR1,TRIB1,NFE2L1,TTBK1,PLXNA4,PTGS2,CEBPA,DUSP3,ATG12,MAS1,FOXP1,SMOC2,MYOD1,UNC13B,NTRK3,IGF1R,SOCS3,SNW1,PPARA,GPR17,HOPX,EGFR,EDNRB,MED1,PTPRS,PTPRF,IL17R…
GO:BP	synaptic vesicle fusion to presynaptic active zone membrane	GO:0031629	0.0110719	1.95578	21	1390	8	27543	SNAP25,CPLX2,STX1B,PRRT2,SYT1,STXBP1,GRIK5,CPLX1
GO:BP	regulation of plasma membrane bounded cell projection assembly	GO:0120032	0.0111438	1.95297	204	1390	27	27543	KCTD17,ZMYND8,NRXN1,TBC1D30,PPP1R9A,SYNE1,DMTN,ATMIN,HDAC4,APC,EPS8L2,CDKL5,HTT,PODXL,SRF,ARHGAP35,STAU2,FMR1,AUTS2,TWF2,FSCN1,ATP8B1,RCC2,BRK1,SLIT2,YAP1,NEURL1A
GO:BP	axon extension	GO:0048675	0.0111934	1.95104	136	1390	21	27543	MGLL,TTL,OLFM1,RTN4R,CXCL12,DIP2B,CDK5R1,PLXNA4,CDKL5,DCLK1,SRF,NTRK3,AUTS2,TWF2,PTPRS,TNFRSF12A,SEMA3G,SLIT2,DSCAM,BDNF,EDNRA
GO:BP	regulation of endocytosis	GO:0030100	0.0111953	1.95096	228	1390	29	27543	CALM1,DLG4,PACSIN1,ARC,PPP3CA,APLN,PIP5K1C,STX1B,IQSEC1,PACSIN3,PPP3R1,SNPH,ACTN4,LRRK2,MIB1,ARRB1,SRC,PPARG,ANKRD13B,MAGI2,LRP1,AKAP5,ITGAV,NUMB,AXL,PCSK9,FMR1,DRD4,SYK
GO:BP	neural retina development	GO:0003407	0.0112457	1.94901	85	1390	16	27543	ATP2B2,ATP2B1,FJX1,PTN,MEGF11,DIO3,HCN1,FAT3,NTRK2,SDK1,CALB1,SDK2,HIPK2,SOX9,DSCAM,SMARCA4
GO:BP	regulation of protein secretion	GO:0050708	0.0119818	1.92148	291	1390	34	27543	PPP3CA,EXPH5,CDK16,OLFR78,RAPGEF4,MYRIP,EFNA5,MYO18A,ADAM9,BRSK2,APBB1,SRCIN1,IL12A,CNR1,NR1D1,ADRB1,PDE8B,PPARD,ARRB1,PPARG,STXBP5L,KCNJ11,PRKCE,ACVR1C,TRPM4,MYH10,RBP4,UNC13B,EGFR,RAB11FIP3,DRD4,ABCC8,RFX3,CRH
GO:BP	JNK cascade	GO:0007254	0.0121072	1.91696	170	1390	24	27543	PLCB1,SMAD3,DAB2IP,RASSF2,RASGRP1,LRRK2,SIRPA,PTK2,MAPK9,HIPK3,TRIB1,TNFRSF19,RB1CC1,DUSP3,MAPK8IP1,PER1,IGF1R,STRADB,MAP3K10,EGFR,WNT7B,HIPK2,DUSP22,EPHB1
GO:BP	negative regulation of cellular protein metabolic process	GO:0032269	0.0122785	1.91085	1057	1390	87	27543	ARPP19,PTPN3,GFRA2,HEG1,WNT9A,DUSP7,SENP2,DAB2IP,AKT2,INPPL1,CRY2,MAP1A,DUSP1,RASSF2,HSPA1B,DMTN,CADM4,ADARB1,LRRK2,PPP1R9B,HHATL,SIRPA,PRKAR1B,PRKCZ,PTPRT,SRCIN1,CPEB2,PTPRB,TBC1D24,SWAP70,WFDC18,APC,PLEC,SERPINI1,ARRB1,CLEC16A,SRC,HIPK3,TRIB1,PKIG,CPEB4,PRKCE,PPP1R1B,GIPC1,ZFYVE28,PTGS2,DUSP3,DUSP6,MGAT5,MAS1,OXR1,MLLT1,ENG,PTPRJ,MLLT6,FNIP1,MAPK8IP1,RPS6KA3,TIMP4,PURB,NTRK3,SPRED1,SOCS3,CD44,S…
GO:BP	positive regulation of cardiac muscle tissue growth	GO:0055023	0.0124541	1.90469	42	1390	11	27543	FGF9,ERBB4,PIN1,ADRB1,RBPJ,MAPK14,PIM1,MEF2C,AKAP6,YAP1,NOTCH1
GO:BP	positive regulation of calcium ion transmembrane transporter activity	GO:1901021	0.0124541	1.90469	42	1390	11	27543	CALM1,CACNB3,CACNB4,ATP2A1,STIM2,HTT,RYR2,CACNA2D1,STAC3,ANK2,AKAP6
GO:BP	carbohydrate metabolic process	GO:0005975	0.01259	1.89997	592	1390	56	27543	ARPP19,GIT1,HKDC1,CHST2,MAN1C1,IGFBP4,RORA,MAN2A1,FUT9,AKT2,INPPL1,MAN1A2,FOXK1,HSD11B1,EXT1,FOXK2,HDAC4,NR1D1,ADRB1,ESRRB,SMPD3,NEU1,PYGM,SRC,KCNJ11,RANBP2,PRKCE,NFE2L1,ST3GAL2,ZBTB7A,RB1CC1,MAPK14,SLC4A4,MAS1,B4GALT2,ST8SIA5,RBP4,SLC39A14,GPT,PFKFB3,PPARGC1A,SEC1,PPARA,ATF4,SLC4A1,PPP1R1A,UXS1,GALT,STK40,PHKG1,ST3GAL4,CHST7,NEU4,FAM3C,SIAE,PGM2L1
GO:BP	positive regulation of potassium ion transport	GO:0043268	0.0126127	1.89919	50	1390	12	27543	KCNC1,KCNA1,ADORA1,RGS7,ATP1B2,KCNN2,DLG1,LRRC38,ANK2,AKAP6,AMIGO1,ABCC8
GO:BP	positive regulation of epithelial to mesenchymal transition	GO:0010718	0.0126127	1.89919	50	1390	12	27543	SMAD3,ZFP703,OLFM1,FERMT2,ENG,LRG1,AXIN2,GCNT2,WWTR1,BMP2,RGCC,NOTCH1
GO:BP	cerebral cortex cell migration	GO:0021795	0.0126127	1.89919	50	1390	12	27543	CDK5R2,DAB2IP,ZMIZ1,SUN1,DAB1,RELN,CDK5R1,SUN2,GLI3,HTR6,EGFR,SLIT2
GO:BP	multicellular organismal signaling	GO:0035637	0.0126863	1.89667	148	1390	22	27543	KCNA2,KCNA1,CACNA1I,S1PR1,CNTNAP1,RAPGEF4,SCN1B,NRCAM,CACNG2,CACNB4,PLEC,NTRK2,CACNA1A,TRPM4,KCNN2,NTRK3,RYR2,CACNA2D1,FMR1,ANK2,ANK3,NFASC
GO:BP	morphogenesis of a branching epithelium	GO:0061138	0.0134059	1.8727	206	1390	27	27543	WNT4,PAK1,PLXND1,PPP3R1,EXT1,PGR,CXCL12,SRC,DLG1,ENG,NOTCH4,SRF,GLI3,LGR4,SOCS3,CSMD1,SPRY2,RSPO2,MED1,ADM,SLIT2,YAP1,SOX9,BMP2,HGF,NOTCH1,EDNRA
GO:BP	regulation of axon extension	GO:0030516	0.0135321	1.86863	106	1390	18	27543	MGLL,TTL,OLFM1,RTN4R,CXCL12,DIP2B,CDK5R1,PLXNA4,CDKL5,SRF,NTRK3,TWF2,PTPRS,TNFRSF12A,SEMA3G,SLIT2,DSCAM,BDNF
GO:BP	peptidyl-threonine modification	GO:0018210	0.0137882	1.86049	127	1390	20	27543	NLK,PRKCB,TRPC6,LMTK2,DMTN,CADM4,LRRK2,PRKCA,CDK5R1,HIPK3,TTBK1,CDC42BPA,TNKS1BP1,SPRED1,MAP3K10,PDPK1,ROCK2,AKT3,SPRY2,HIPK2
GO:BP	endocytosis	GO:0006897	0.0139291	1.85608	696	1390	63	27543	ENDOU,SNAP25,CD6,CALM1,DLG4,PACSIN1,ARC,PPP3CA,APLN,PIP5K1C,SORT1,STX1B,IQSEC1,INPPL1,PACSIN3,TFRC,PPP3R1,SYT1,RAMP3,SNPH,MYO18A,ACTN4,LRRK2,SIRPA,ARR3,CSNK1G2,MYO1E,FCHO1,CACNG2,RAMP1,MIB1,TBC1D24,TUB,ARRB1,SRC,PPARG,ANKRD13B,SH3BP1,LRP4,MAGI2,LRP1,AKAP5,ITGAV,ACKR2,RAB31,WASF1,NUMB,MYO6,AXL,PCSK9,SORL1,FMR1,HTR1B,CD320,ANK2,TLN2,ADM,ARHGAP25,DRD4,ACKR3,SYK,MYH9,SNCB
GO:BP	cytoskeleton-dependent intracellular transport	GO:0030705	0.0140806	1.85138	183	1390	25	27543	MAP6D1,BSN,KIF5C,MYO5C,MYO5A,MYRIP,MAP1A,CCDC88C,RASGRP1,ACTN4,PRKCZ,SUN1,MYO1E,TUB,TRAK1,NEFH,HTT,WASF1,SUN2,KIF1C,STAU2,MYO1B,TANC2,AGTPBP1,DYNC1H1
GO:BP	erythrocyte differentiation	GO:0030218	0.0141631	1.84884	138	1390	21	27543	PLCB1,ZFPM1,BAP1,HSPA1B,DMTN,ANK1,FOXO3,NFE2L1,ZBTB7A,EPAS1,MAPK14,LMO2,GAS2L1,SRF,INPP5D,SOX6,SLC4A1,MED1,ALAS2,SMARCA4,INHBA
GO:BP	adaptive thermogenesis	GO:1990845	0.0141842	1.84819	149	1390	22	27543	DIO2,ABHD6,E030003E18RIK,ESRRG,NR1D1,ADRB1,RBPJ,IL4RA,EPAS1,ZBTB7B,NOVA1,DDIT3,TLE3,LGR4,SORL1,PPARGC1A,ATF4,DYNC1H1,PTH2R,ACOT11,SYK,NOTCH1
GO:BP	erythrocyte homeostasis	GO:0034101	0.0141842	1.84819	149	1390	22	27543	PLCB1,ZFPM1,BAP1,HSPA1B,DMTN,ANK1,FOXO3,NFE2L1,ZBTB7A,EPAS1,MAPK14,LMO2,GAS2L1,SRF,AXL,INPP5D,SOX6,SLC4A1,MED1,ALAS2,SMARCA4,INHBA
GO:BP	negative regulation of muscle contraction	GO:0045932	0.0142182	1.84716	28	1390	9	27543	ADORA1,DOCK4,ADRA2C,PDE5A,ADRB1,ATP2A1,PTGS2,ARHGAP42,ATP1A2
GO:BP	response to amphetamine	GO:0001975	0.0142327	1.84671	35	1390	10	27543	GRIN2A,CALM1,PPP3CA,RGS7,PPP1R9B,GRIN1,PPP1R1B,ASIC1,DRD4,EDNRA
GO:BP	negative regulation of small GTPase mediated signal transduction	GO:0051058	0.0142851	1.84512	59	1390	13	27543	DGKZ,GIT1,HEG1,DAB2IP,SCAI,SYNGAP1,SH3BP1,ARHGAP42,ARHGAP35,SPRY2,ADRA1A,SLIT2,ARHGAP25
GO:BP	regulation of timing of cell differentiation	GO:0048505	0.0144383	1.84048	11	1390	6	27543	FGF9,HES3,RBPJ,ASCL1,SOX5,GDPD5
GO:BP	regulation of body fluid levels	GO:0050878	0.0144409	1.84041	372	1390	40	27543	HEG1,ATP2B2,WFS1,PPP3CA,APLN,ADORA1,TYRO3,PIP5K1C,ALOX12B,ERBB4,MPL,DMTN,EXT1,MERTK,ADRA2C,STXBP1,PRKCA,ADRB1,PLEC,PRKCE,CELSR2,ZBTB7B,CORO2B,MLLT6,SRF,NCOR2,AXL,SCNN1A,SLC4A1,AQP4,AQP6,EGFR,EDNRB,MED1,ST3GAL4,ADM,VWF,NEURL1A,SYK,HPSE
GO:BP	branching morphogenesis of an epithelial tube	GO:0048754	0.014861	1.82795	172	1390	24	27543	WNT4,PAK1,PLXND1,PPP3R1,EXT1,PGR,CXCL12,SRC,DLG1,ENG,NOTCH4,SRF,GLI3,LGR4,CSMD1,SPRY2,RSPO2,MED1,SLIT2,YAP1,SOX9,BMP2,NOTCH1,EDNRA
GO:BP	carboxylic acid transport	GO:0046942	0.0151447	1.81974	307	1390	35	27543	GRM2,STARD10,SLC13A5,SFXN5,ADORA1,SLC6A1,SLC16A6,SLC1A3,SLC23A3,SLC25A18,SLC1A2,STXBP1,CACNB4,SLCO2A1,MAPK9,KCNJ10,NFE2L1,NTRK2,MFSD12,SLC6A17,SLC36A1,GIPC1,PTGS2,CACNA1A,SLC25A22,PLA2G5,HTR1B,HTR6,LRRC8C,SLC38A3,ATP8B1,DRD4,BDNF,SLCO1C1,SYK
GO:BP	regulation of potassium ion transmembrane transport	GO:1901379	0.0153945	1.81264	87	1390	16	27543	KCNC1,KCNA1,RGS7,NETO2,KCNIP3,ATP1B2,KCNN2,DLG1,KCNS2,LRRC38,ANK2,KCNAB1,AKAP6,ANK3,AMIGO1,ABCC8
GO:BP	nephron development	GO:0072006	0.01547	1.81051	161	1390	23	27543	WNT4,PPP3CA,FMN1,ERBB4,EXT1,MYO1E,MAGI2,EGR1,DLG1,PODXL,GLI3,CALB1,LGR4,MEF2C,EDNRB,WNT7B,WWTR1,YAP1,AQP11,SOX9,BMP2,NOTCH1,EDNRA
GO:BP	negative regulation of neuron apoptotic process	GO:0043524	0.0155256	1.80895	184	1390	25	27543	WFS1,BOK,TYRO3,GABRB2,GRIN1,STXBP1,PTPRZ1,SYNGAP1,PIN1,AGAP2,ARRB1,CPEB4,NTRK2,CACNA1A,OXR1,FZD9,AXL,PDPK1,PPARGC1A,MEF2C,NES,HIPK2,BDNF,SNCB,ADAM8
GO:BP	cerebellum morphogenesis	GO:0021587	0.0157399	1.803	51	1390	12	27543	WHRN,ATP2B2,RORA,NRXN1,SPTBN2,ZFP365,DAB1,CACNA1A,MTPN,HERC1,NFIX,AGTPBP1
GO:BP	cranial nerve development	GO:0021545	0.0157399	1.803	51	1390	12	27543	KCNA2,SLC1A3,ADARB1,EXT1,HES3,EGR2,PLXNA4,GLI3,ATP8B1,EPHB1,ACKR3,NAV2
GO:BP	response to amine	GO:0014075	0.0157399	1.803	51	1390	12	27543	GRIN2A,KCNC1,CALM1,PPP3CA,RGS7,PPP1R9B,GRIN1,PPP1R1B,GLDC,ASIC1,DRD4,EDNRA
GO:BP	glycoprotein metabolic process	GO:0009100	0.0157446	1.80287	360	1390	39	27543	PLCB1,DPY19L1,MAN1C1,ST3GAL5,GALNT18,MAN2A1,GCNT4,FUT9,MAN1A2,HS6ST3,EXT1,RAMP1,HBEGF,SLC35C1,HS6ST1,MGAT4B,PPARD,XYLT1,ST3GAL2,BACE2,MGAT5,XXYLT1,EXTL3,B4GALT2,ST8SIA5,STT3B,PHLDA1,SEC1,GCNT2,ST3GAL4,FBXO27,CHST7,UGGT1,AQP11,NEU4,FUT11,BMP2,GALNT9,HPSE
GO:BP	cellular response to metal ion	GO:0071248	0.015924	1.79795	196	1390	26	27543	GRIN2A,SLC13A5,KCNA1,DLG4,ADCY1,SLC25A23,NRXN1,TFRC,KCNH1,DMTN,SYT1,RYR1,LRRK2,SYT12,MAPK9,SMPD3,NFE2L1,SYT13,PTGS2,CEBPA,ATF4,MEF2C,EGFR,ANK3,KCNK3,NPTX1
GO:BP	neurotrophin signaling pathway	GO:0038179	0.0159749	1.79656	43	1390	11	27543	CYFIP2,LMTK2,SORT1,SRC,NTRK2,MAGI2,WASF1,NTRK3,SPRY2,PTPRF,BDNF
GO:BP	cerebellar cortex morphogenesis	GO:0021696	0.0159749	1.79656	43	1390	11	27543	WHRN,ATP2B2,RORA,NRXN1,SPTBN2,ZFP365,CACNA1A,MTPN,HERC1,NFIX,AGTPBP1
GO:BP	potassium ion import across plasma membrane	GO:1990573	0.0159749	1.79656	43	1390	11	27543	ATP1A1,SLC12A5,KCNJ9,ATP1B2,KCNJ12,KCNJ10,KCNJ11,DLG1,ATP1A2,KCNK9,HCN2
GO:BP	homeostasis of number of cells	GO:0048872	0.0160139	1.7955	347	1390	38	27543	PLCB1,ZFPM1,BAP1,GCNT4,ZBTB18,MPL,RASSF2,HSPA1B,DMTN,EXT1,MERTK,ANK1,FOXO3,NFE2L1,ZBTB7A,EPAS1,MAPK14,LMO2,GAS2L1,SRF,VHL,AXL,INPP5D,CD7,LGR4,KITL,GPAM,SOX6,AKT3,SLC4A1,MEF2C,MED1,ALAS2,CRISPLD1,SOX9,SMARCA4,NOTCH1,INHBA
GO:BP	negative regulation of supramolecular fiber organization	GO:1902904	0.0164415	1.78406	173	1390	24	27543	MAP6D1,S1PR1,PPP1R9A,SHANK1,SPTBN2,MAP1A,DMTN,SHANK3,SPTB,CTNNA2,NAV3,TPM1,SWAP70,APC,CORO2B,MTPN,GAS2L1,ARHGEF2,TRIM54,CAMSAP1,TWF2,ADD2,SLIT2,RHPN1
GO:BP	embryonic morphogenesis	GO:0048598	0.0165097	1.78226	641	1390	59	27543	WHRN,SMAD3,WNT4,WNT9A,ATP2B2,FGF9,APLN,DUSP1,LUZP1,DLX1AS,E030003E18RIK,SHANK3,EXT1,ZBTB16,HES3,LMO4,FZD3,MIB1,MICAL2,HIRA,ESRRB,FRZB,SHROOM3,LAMB3,RBPJ,LRP4,ZBTB17,SCX,LAMA3,ITGAV,DLG1,ENG,RBP4,PTK7,SRF,GLI3,MBNL1,ARHGAP35,RYR2,SOCS3,SPRY2,RSPO2,DVL3,CTHRC1,MEF2C,TRIOBP,MED1,WNT7B,MMP15,ADM,ALDH1A3,YAP1,HIPK2,SOX9,SMARCA4,INSIG1,NOTCH1,EDNRA,INHBA
GO:BP	vesicle fusion to plasma membrane	GO:0099500	0.0166284	1.77915	22	1390	8	27543	SNAP25,CPLX2,STX1B,PRRT2,SYT1,STXBP1,GRIK5,CPLX1
GO:BP	regulation of postsynaptic neurotransmitter receptor internalization	GO:0099149	0.0166284	1.77915	22	1390	8	27543	PACSIN1,ARC,PIP5K1C,IQSEC1,PPP3R1,AKAP5,NUMB,DRD4
GO:BP	postsynaptic density assembly	GO:0097107	0.0166284	1.77915	22	1390	8	27543	SIPA1L1,NRXN1,PTPRD,SHANK3,RELN,NTRK3,PTPRS,NPTX1
GO:BP	inflammatory response	GO:0006954	0.0170533	1.76819	745	1390	66	27543	MGLL,GIT1,SMAD3,CD6,BAP1,CHST2,ADCY1,IGFBP4,ACKR1,ADORA1,TYRO3,RORA,DAB2IP,MYO5A,MYLK3,PTN,DAGLB,CDK19,TFRC,ASH1L,RASGRP1,EXT1,LRRK2,SIRPA,PRKCZ,PDE5A,METRNL,CNR1,NR1D1,PPARD,PPARG,RBPJ,NFE2L1,TTBK1,BACE2,IL4RA,MAPK14,PTGS2,CEBPA,MAS1,FOXP1,ITGAV,ACKR2,FASN,PER1,AXL,SOCS3,PPARA,GPR17,EGFR,EDNRB,TRIL,IL17RA,PRCP,NR1D2,SLIT2,C2CD4B,BMP2,IRAK2,HGF,SYK,NOTCH1,HPSE,EDNRA,CRH,ADAM8
GO:BP	maintenance of location in cell	GO:0051651	0.0171773	1.76505	233	1390	29	27543	CALM1,ITPR1,SLC25A23,SLC30A4,SYNE1,MYO5A,JSRP1,JPH3,RYR1,SUN1,GRIK5,ATP2A1,PRKCE,TMEM38A,HTT,ITGAV,SUN2,DDIT3,RYR2,SORL1,PDPK1,ANK2,TWF2,AKAP6,ITPR2,MPRIP,ANK3,INSIG1,EDNRA
GO:BP	neuroblast proliferation	GO:0007405	0.0176333	1.75367	69	1390	14	27543	KCNA1,PTN,DAGLB,LRRK2,ACSL6,FZD3,NUMB,FZD9,GLI3,ASCL1,ARHGEF2,SOX5,BDNF,NOTCH1
GO:BP	camera-type eye morphogenesis	GO:0048593	0.0178291	1.74887	140	1390	21	27543	MAN2A1,FJX1,PTN,E030003E18RIK,MEGF11,DIO3,HCN1,FAT3,NTRK2,RBP4,SDK1,GLI3,CALB1,VHL,SDK2,ATF4,ALDH1A3,HIPK2,SOX9,EPHB1,DSCAM
GO:BP	regulation of Notch signaling pathway	GO:0008593	0.0179423	1.74612	88	1390	16	27543	HEY1,ZMIZ1,TSPAN5,SLC35C1,ARRB1,SRC,RBPJ,ZBTB7A,NOTCH4,ASCL1,SREBF2,GDPD5,CBFA2T2,YAP1,NEURL1A,NOTCH1
GO:BP	axon ensheathment	GO:0008366	0.0181734	1.74056	174	1390	24	27543	AKT2,MYO5A,PTN,CNTNAP1,PPP3R1,PTPRZ1,LGI4,KCNJ10,PLEC,EGR2,PPARD,NTRK2,DLG1,NTRK3,ADAM22,QK,ANK2,XK,S100B,AMIGO1,MALL,JAM2,NFASC,HGF
GO:BP	ensheathment of neurons	GO:0007272	0.0181734	1.74056	174	1390	24	27543	AKT2,MYO5A,PTN,CNTNAP1,PPP3R1,PTPRZ1,LGI4,KCNJ10,PLEC,EGR2,PPARD,NTRK2,DLG1,NTRK3,ADAM22,QK,ANK2,XK,S100B,AMIGO1,MALL,JAM2,NFASC,HGF
GO:BP	exploration behavior	GO:0035640	0.0188178	1.72543	36	1390	10	27543	DLG4,BRINP1,JPH3,SHANK3,LRRK2,PRKCE,ATP1A2,SHANK2,GAD1,CRH
GO:BP	regulation of voltage-gated calcium channel activity	GO:1901385	0.0188178	1.72543	36	1390	10	27543	NOS1AP,CALM1,CACNB3,CACNB4,AHNAK,CACNA1A,CACNA2D1,STAC3,CACNB1,DRD4
GO:BP	neural precursor cell proliferation	GO:0061351	0.0188281	1.72519	186	1390	25	27543	KCNA1,RORA,PTN,GPR37L1,DAGLB,SHANK3,LRRK2,ACSL6,FZD3,PTPRZ1,FOXO3,TACC1,MELK,NUMB,FZD9,NCOR2,GLI3,ASCL1,ARHGEF2,SOX5,WNT7B,NES,EPHB1,BDNF,NOTCH1
GO:BP	myeloid cell homeostasis	GO:0002262	0.0188281	1.72519	186	1390	25	27543	PLCB1,ZFPM1,BAP1,MPL,HSPA1B,DMTN,MERTK,ANK1,FOXO3,NFE2L1,ZBTB7A,EPAS1,MAPK14,LMO2,GAS2L1,SRF,AXL,INPP5D,KITL,SOX6,SLC4A1,MED1,ALAS2,SMARCA4,INHBA
GO:BP	phosphatidylinositol-mediated signaling	GO:0048015	0.0190624	1.71982	163	1390	23	27543	PLCB1,PLCB4,PITPNM2,ERBB4,DAB2IP,RASGRP1,PLCH2,PREX2,PI4KA,PTK2,RELN,AGAP2,PPARD,NTRK2,PLCD3,CAR8,NTRK3,IGF1R,PLXNB1,PIK3R2,EGFR,SOX9,HGF
GO:BP	regulation of hormone biosynthetic process	GO:0046885	0.0196941	1.70566	29	1390	9	27543	WNT4,ATP1A1,PDE8B,CLCN2,CACNA1A,EGR1,IGF1R,PPARGC1A,BMP2
GO:BP	positive regulation of small GTPase mediated signal transduction	GO:0051057	0.0198182	1.70294	79	1390	15	27543	RTN4R,RASGRP1,NET1,RASGEF1A,RELN,ARRB1,SRC,ITGAV,KITL,AUTS2,GPR17,DGKI,ARHGEF3,STK19,NOTCH1
GO:BP	striated muscle cell proliferation	GO:0014855	0.0198182	1.70294	79	1390	15	27543	FGF9,ERBB4,VGLL4,PPARD,RBPJ,MAPK14,PIM1,KCNK2,FOXP1,RBP4,MEF2C,MAPK11,YAP1,EPHB1,NOTCH1
GO:BP	positive regulation of heart growth	GO:0060421	0.0203326	1.69181	44	1390	11	27543	FGF9,ERBB4,PIN1,ADRB1,RBPJ,MAPK14,PIM1,MEF2C,AKAP6,YAP1,NOTCH1
GO:BP	negative regulation of transferase activity	GO:0051348	0.0204404	1.68951	260	1390	31	27543	HEG1,DUSP7,DAB2IP,INPPL1,DUSP1,ADARB1,PRKAR1B,PIP4K2C,PTPRT,SRCIN1,PTPRB,APC,PLEC,SRC,PPARG,HIPK3,TRIB1,PKIG,ZFYVE28,DUSP3,MLLT1,PTPRJ,MAPK8IP1,SPRED1,SORL1,PDPK1,SPRY2,WWTR1,DUSP22,DEPTOR,BMP2
GO:BP	urogenital system development	GO:0001655	0.0205106	1.68802	391	1390	41	27543	SMAD3,WNT4,WFS1,PLXND1,PPP3CA,FMN1,GCNT4,ERBB4,BMPER,EXT1,ZBTB16,LRRK2,MYO1E,LRP4,MAGI2,EGR1,DLG1,PODXL,RBP4,PTK7,GLI3,CALB1,LGR4,PCSK9,MEF2C,EDNRB,DACT2,WNT7B,ADAMTS1,WWTR1,SLIT2,YAP1,AQP11,SCHIP1,SOX9,NFIA,BMP2,BDNF,RHPN1,NOTCH1,EDNRA
GO:BP	morphogenesis of a branching structure	GO:0001763	0.0207621	1.68273	223	1390	28	27543	WNT4,PAK1,PLXND1,PPP3R1,EXT1,LRRK2,PGR,CXCL12,SRC,DLG1,ENG,NOTCH4,SRF,GLI3,LGR4,SOCS3,CSMD1,SPRY2,RSPO2,MED1,ADM,SLIT2,YAP1,SOX9,BMP2,HGF,NOTCH1,EDNRA
GO:BP	regulation of blood pressure	GO:0008217	0.0210137	1.6775	211	1390	27	27543	SMAD3,ATP1A1,ATP2B1,APLN,ADORA1,OLFR78,GPR37L1,EXT1,TPM1,CNR1,RASL10B,ADRB1,RPS6KA2,PTGS2,ARHGAP42,CORO2B,ENG,ACVRL1,ATP1A2,PPARA,ADRA1A,EDNRB,PRCP,ADM,EDNRA,CRH,NAV2
GO:BP	acidic amino acid transport	GO:0015800	0.0210259	1.67725	70	1390	14	27543	GRM2,ADORA1,SLC6A1,SLC1A3,SLC25A18,SLC1A2,STXBP1,KCNJ10,NTRK2,GIPC1,SLC25A22,HTR6,LRRC8C,BDNF
GO:BP	cardiac muscle cell proliferation	GO:0060038	0.0210966	1.67579	61	1390	13	27543	FGF9,ERBB4,VGLL4,RBPJ,MAPK14,PIM1,KCNK2,FOXP1,RBP4,MEF2C,MAPK11,YAP1,NOTCH1
GO:BP	placenta development	GO:0001890	0.0221434	1.65475	176	1390	24	27543	ETNK2,SENP2,IL11RA1,PTN,ASH1L,HTRA1,HS6ST1,ESRRB,PPARD,RBPJ,EPAS1,MAPK14,PTGS2,CEBPA,PLCD3,KISS1,ITGAV,PEG10,SOCS3,EGFR,MED1,WNT7B,ADM,BIRC6
GO:BP	regulation of dephosphorylation	GO:0035303	0.0222652	1.65237	131	1390	20	27543	ARPP19,SMAD3,CALM1,SLC39A10,ADORA1,CRY2,PPP1R9B,SWAP70,PIN1,SRC,PPP1R1B,MAGI2,MGAT5,HTT,ROCK2,PPP6R1,MEF2C,MPRIP,BMP2,NUAK1
GO:BP	positive regulation of protein transport	GO:0051222	0.0231708	1.63506	313	1390	35	27543	FBXW7,EXPH5,CACNB3,AKT2,OLFR78,RAPGEF4,MYRIP,MYO18A,ADAM9,PRKCZ,APBB1,ADRB1,PPARD,ARRB1,SRC,PPARG,CDK5R1,PRKCE,ZDHHC2,MTCL1,MAPK14,PTGS2,TRPM4,MYH10,AKAP5,RBP4,ACSL3,GLI3,UNC13B,SORL1,PIK3R2,EGFR,ANK3,SEC16B,CRH
GO:BP	ventricular cardiac muscle tissue morphogenesis	GO:0055010	0.0240899	1.61817	53	1390	12	27543	LY6E,TNNC1,HEG1,MYBPC3,TPM1,RBPJ,ENG,MYH7,RYR2,MED1,NOTCH1,EDNRA
GO:BP	trabecula morphogenesis	GO:0061383	0.0240899	1.61817	53	1390	12	27543	HEG1,S1PR1,RBPJ,ENG,RBP4,SRF,PLXNB1,MED1,ADAMTS1,SMARCA4,FHL2,NOTCH1
GO:BP	muscle organ morphogenesis	GO:0048644	0.0241936	1.6163	90	1390	16	27543	ZFPM1,LY6E,TNNC1,HEG1,MYBPC3,S1PR1,ADARB1,TPM1,RBPJ,ENG,MYH7,RYR2,MED1,BMP2,NOTCH1,EDNRA
GO:BP	regulation of long-term synaptic depression	GO:1900452	0.0243148	1.61413	17	1390	7	27543	ARC,ADORA1,PPP1R9A,SHANK3,SORCS3,STAU2,DGKI
GO:BP	retina layer formation	GO:0010842	0.0243686	1.61317	23	1390	8	27543	FJX1,MEGF11,FAT3,SDK1,CALB1,SDK2,HIPK2,DSCAM
GO:BP	regulation of organelle assembly	GO:1902115	0.0250308	1.60153	213	1390	27	27543	SIPA1L1,ASAP1,KCTD17,TRIM37,ARHGEF9,NRXN1,TBC1D30,SYNE1,HSPA1B,PTPRD,ATMIN,LRRK2,PIP4K2C,MAPK9,SRC,CDKL5,HTT,NUMB,ARHGAP35,NTRK3,ARHGEF2,WIPI1,FSCN1,PTPRS,NPTX1,YAP1,DYNC1H1
GO:BP	negative regulation of cold-induced thermogenesis	GO:0120163	0.0256891	1.59025	45	1390	11	27543	ABHD6,E030003E18RIK,NR1D1,RBPJ,NOVA1,DDIT3,TLE3,LGR4,ATF4,ACOT11,NOTCH1
GO:BP	neuron recognition	GO:0008038	0.0256891	1.59025	45	1390	11	27543	EXT1,NPTN,NRCAM,PTPRZ1,CNR1,CDK5R1,ARHGAP35,AMIGO1,DSCAM,BDNF,NCAM2
GO:BP	myotube cell development	GO:0014904	0.0256891	1.59025	45	1390	11	27543	PPP3CA,CNTNAP1,RYR1,HOMER1,HDAC4,PLEC,ACTA1,MYOD1,STAC3,KLHL40,XK
GO:BP	inositol lipid-mediated signaling	GO:0048017	0.0258811	1.58702	166	1390	23	27543	PLCB1,PLCB4,PITPNM2,ERBB4,DAB2IP,RASGRP1,PLCH2,PREX2,PI4KA,PTK2,RELN,AGAP2,PPARD,NTRK2,PLCD3,CAR8,NTRK3,IGF1R,PLXNB1,PIK3R2,EGFR,SOX9,HGF
GO:BP	Notch signaling pathway	GO:0007219	0.0268853	1.57048	178	1390	24	27543	FBXW7,SORBS2,HEY1,ZMIZ1,TSPAN5,HES3,SLC35C1,MIB1,ARRB1,SRC,RBPJ,ZBTB7A,CEBPA,NOTCH4,ASCL1,TIMP4,SREBF2,GDPD5,CBFA2T2,YAP1,SOX9,BMP2,NEURL1A,NOTCH1
GO:BP	positive regulation of calcium ion transmembrane transport	GO:1904427	0.0275683	1.55959	101	1390	17	27543	CALM1,CACNB3,RAMP3,GRIN1,CACNB4,ADRB1,ATP2A1,STIM2,AKAP5,HTT,RYR2,PDPK1,CACNA2D1,STAC3,ANK2,AKAP6,EDNRA
GO:BP	positive regulation of lipid biosynthetic process	GO:0046889	0.0275683	1.55959	101	1390	17	27543	CCDC3,WNT4,ABHD6,ERBB4,LPGAT1,MAPK9,NR1D1,SMPD3,STARD4,PTGS2,ACSL3,SREBF2,IGF1R,GPAM,PPARGC1A,PPARA,SEC14L2
GO:BP	regulation of postsynaptic cytosolic calcium ion concentration	GO:0099566	0.0276383	1.55849	12	1390	6	27543	ATP2B2,ITPR1,MYO5A,FZD9,CALB1,SLC8A2
GO:BP	regulation of cellular ketone metabolic process	GO:0010565	0.0278387	1.55535	144	1390	21	27543	WNT4,DKKL1,AKT2,LPGAT1,MAPK9,CNR1,NR1D1,PPARD,STARD4,PPARG,PRKCE,NFE2L1,PTGS2,CLCN2,EGR1,NCOR2,PPARGC1A,PPARA,SOX9,BMP2,INSIG1
GO:BP	positive regulation of establishment of protein localization	GO:1904951	0.0281724	1.55018	329	1390	36	27543	FBXW7,EXPH5,CACNB3,AKT2,OLFR78,RAPGEF4,MYRIP,MYO18A,ADAM9,PRKCZ,APBB1,ADRB1,PPARD,ARRB1,SRC,PPARG,CDK5R1,PRKCE,ZDHHC2,MTCL1,MAPK14,PTGS2,CORO2B,TRPM4,MYH10,AKAP5,RBP4,ACSL3,GLI3,UNC13B,SORL1,PIK3R2,EGFR,ANK3,SEC16B,CRH
GO:BP	response to epidermal growth factor	GO:0070849	0.0295589	1.52931	54	1390	12	27543	GIT1,ERBB4,DAB2IP,PPP1R9B,BAIAP2,DUSP3,ASCL1,PDPK1,EGFR,MED1,DUSP22,SOX9
GO:BP	cell-cell junction organization	GO:0045216	0.0297355	1.52672	215	1390	27	27543	WHRN,SMAD3,ZFP703,HEG1,CNTNAP1,EXT1,ACTN4,FERMT2,CTNNA2,PRKCA,PLEC,SRC,PKP1,CDH12,DLG1,CDH22,NUMB,SRF,CDH11,ROCK2,HOPX,ANK2,FSCN1,ARVCF,ABCC8,NFASC,ESAM
GO:BP	regulation of lipid biosynthetic process	GO:0046890	0.030089	1.52159	203	1390	26	27543	CCDC3,WNT4,ATP1A1,ABHD6,DKKL1,ERBB4,LPGAT1,THRSP,MAPK9,NR1D1,SMPD3,PDE8B,STARD4,PTGS2,CLCN2,EGR1,ACSL3,SREBF2,IGF1R,GPAM,PPARGC1A,PPARA,SAMD8,SEC14L2,BMP2,INSIG1
GO:BP	regulation of epithelial cell migration	GO:0010632	0.0315692	1.50074	228	1390	28	27543	FBXW7,DAB2IP,BMPER,IQSEC1,PTN,ADAM9,PTK2,HBEGF,PRKCA,SRC,PRKCE,SH3BP1,PTGS2,FOXP1,SMOC2,ACVRL1,SPRED1,PDPK1,ROCK2,AKT3,PIK3R2,MEF2C,PRCP,DNAJA4,SLIT2,SOX9,RGCC,NOTCH1
GO:BP	regulation of vasoconstriction	GO:0019229	0.0317871	1.49775	82	1390	15	27543	MGLL,ATP2B1,APLN,ADRA1B,DOCK4,ADRA2C,PDE5A,ZDHHC21,PTGS2,ARHGAP42,TRPM4,ATP1A2,ADRA1A,EGFR,ADM
GO:BP	negative chemotaxis	GO:0050919	0.0322306	1.49173	46	1390	11	27543	LRTM2,RTN4R,RTN4RL1,EFNA5,FLRT2,PLXNA4,ITGAV,NRG3,LGR4,SEMA3G,SLIT2
GO:BP	regulation of actin filament-based movement	GO:1903115	0.0322306	1.49173	46	1390	11	27543	TNNC1,ATP1A1,ADORA1,ADRB1,ATP2A1,TRPM4,DLG1,ATP1A2,RYR2,ANK2,AKAP6
GO:BP	regulation of protein dephosphorylation	GO:0035304	0.0323158	1.49058	92	1390	16	27543	ARPP19,CALM1,SLC39A10,ADORA1,CRY2,PPP1R9B,SWAP70,PIN1,PPP1R1B,MAGI2,MGAT5,HTT,ROCK2,PPP6R1,MPRIP,NUAK1
GO:BP	metabolic process	GO:0008152	0.0333039	1.4775	14679	1390	817	27543	MAPK4,MAP6D1,SCRT1,ARPP19,MGLL,ENDOU,TTL,ADCY9,PLCB1,FBXW7,CAMKK2,DGKZ,NFIC,GIT1,WHRN,ZFPM1,CCDC3,LY6E,NOS1AP,PPME1,SMAD3,PTPN3,CUX1,KCTD1,GRM2,MAPK6,GFRA2,KCTD17,TTC7B,ZNFX1,ZFP703,ATF6,GRIN2A,DIO2,NLK,ETNK2,CD6,PDP1,PRKCB,CALM1,OLFM1,HKDC1,PLCB4,SLC39A10,WNT4,HEG1,WNT9A,PHOSPHO1,RASD1,DUSP7,TTLL11,ATP2B2,TRPC6,BAP1,DLG4,JDP2,CAMTA2,PAK1,CHST2,HERC6,FGF9,DPY19L1,CAMK4,WFS1,ADCY1,WSB2,CUX2,ATP1A1…
GO:BP	response to extracellular stimulus	GO:0009991	0.0343348	1.46427	569	1390	53	27543	WNT4,ATP2B1,TFRC,FOXK1,LRRK2,SLC1A2,FOXK2,FAM107A,BRSK2,RASAL2,CNR1,FOXO3,ADRB1,PLEC,ACTA1,PPARD,CLEC16A,SRC,PPARG,CPEB4,RNF152,ACVR1C,MAPK14,PTGS2,TBL1XR1,BRSK1,PIM1,GAS2L1,MYOD1,FNIP1,SRF,ASCL1,DDIT3,GPT,ARHGAP35,LIPG,SREBF2,AXL,IGF1R,PCSK9,SORL1,SNW1,PPARGC1A,SHANK2,PPARA,ATF4,EGFR,WIPI1,MED1,SLC38A3,ADM,KLF10,NUAK1
GO:BP	glycoprotein biosynthetic process	GO:0009101	0.0353083	1.45212	306	1390	34	27543	PLCB1,DPY19L1,MAN1C1,ST3GAL5,GALNT18,MAN2A1,GCNT4,FUT9,MAN1A2,HS6ST3,EXT1,RAMP1,HBEGF,SLC35C1,HS6ST1,MGAT4B,XYLT1,ST3GAL2,BACE2,MGAT5,XXYLT1,EXTL3,B4GALT2,ST8SIA5,STT3B,PHLDA1,SEC1,GCNT2,ST3GAL4,CHST7,UGGT1,AQP11,FUT11,GALNT9
GO:BP	dopamine transport	GO:0015872	0.0360827	1.4427	55	1390	12	27543	GRM2,PRKCB,KCNA2,MYO5A,SYT1,SYT12,CNR1,SMPD3,CXCL12,SYT13,HTR1B,HTR6
GO:BP	excitatory synapse assembly	GO:1904861	0.0361793	1.44154	31	1390	9	27543	SIPA1L1,NRXN1,PTPRD,SHANK3,NPTN,RELN,NTRK3,PTPRS,NPTX1
GO:BP	regulation of potassium ion transmembrane transporter activity	GO:1901016	0.0366621	1.43578	64	1390	13	27543	KCNC1,KCNA1,NETO2,ATP1B2,DLG1,KCNS2,LRRC38,ANK2,KCNAB1,AKAP6,ANK3,AMIGO1,ABCC8
GO:BP	regulation of inflammatory response	GO:0050727	0.0367178	1.43512	333	1390	36	27543	MGLL,GIT1,SMAD3,BAP1,ADORA1,TYRO3,RORA,DAGLB,CDK19,ASH1L,LRRK2,PDE5A,METRNL,CNR1,NR1D1,PPARD,PPARG,NFE2L1,TTBK1,PTGS2,CEBPA,MAS1,FOXP1,SOCS3,PPARA,GPR17,EGFR,EDNRB,IL17RA,NR1D2,SLIT2,C2CD4B,HGF,HPSE,EDNRA,ADAM8
GO:BP	regulation of phosphatase activity	GO:0010921	0.0370062	1.43173	83	1390	15	27543	SMAD3,CALM1,SLC39A10,CRY2,PPP1R9B,PPP1R1B,MAGI2,MGAT5,HTT,ROCK2,PPP6R1,MEF2C,MPRIP,BMP2,NUAK1
GO:BP	parasympathetic nervous system development	GO:0048486	0.038052	1.41962	18	1390	7	27543	ADARB1,HES3,EGR2,PLXNA4,ASCL1,ACKR3,NAV2
GO:BP	negative regulation of synaptic transmission, GABAergic	GO:0032229	0.0381305	1.41873	8	1390	5	27543	ADORA1,SLC6A1,STXBP1,HTR1B,BDNF
GO:BP	macromolecule catabolic process	GO:0009057	0.0406285	1.39117	1347	1390	103	27543	FBXW7,GIT1,SMAD3,PTPN3,KCTD17,GRIN2A,BAP1,WFS1,DLGAP1,FBXL16,DAB2IP,PACSIN3,MAP1A,RNF144A,HSPA1B,UBQLN4,ZNRF1,VGLL4,ABHD17A,FBXO31,EXT1,LRRK2,ADAM9,UBE3B,KCTD6,BRSK2,PTK2,SGTB,HECW1,UBE2G1,MAPK9,MIB1,EXOG,1700016K19RIK,NR1D1,PIN1,APC,ADRB1,UPF2,PYGM,AGAP2,ARRB1,CLEC16A,PKP1,RNF165,USP2,TRIB1,SDF2L1,NFE2L1,FBXO33,GIPC1,ZDHHC2,RB1CC1,HECW2,TBL1XR1,USP31,LRP1,HACE1,HERC2,NKD1,TTC3,RMND5A,RNF166,USP3…
GO:BP	regulation of cardiac muscle cell contraction	GO:0086004	0.0409839	1.38739	39	1390	10	27543	ATP1A1,ADORA1,ADRB1,ATP2A1,TRPM4,DLG1,ATP1A2,RYR2,ANK2,AKAP6
GO:BP	myelination	GO:0042552	0.0422751	1.37392	171	1390	23	27543	AKT2,MYO5A,PTN,CNTNAP1,PPP3R1,PTPRZ1,LGI4,KCNJ10,PLEC,EGR2,NTRK2,DLG1,NTRK3,ADAM22,QK,ANK2,XK,S100B,AMIGO1,MALL,JAM2,NFASC,HGF
GO:BP	cellular metabolic process	GO:0044237	0.0424838	1.37178	13166	1390	740	27543	MAPK4,MAP6D1,SCRT1,ARPP19,MGLL,ENDOU,TTL,ADCY9,PLCB1,FBXW7,CAMKK2,DGKZ,NFIC,GIT1,ZFPM1,LY6E,NOS1AP,PPME1,SMAD3,PTPN3,CUX1,KCTD1,MAPK6,GFRA2,KCTD17,TTC7B,ZFP703,ATF6,GRIN2A,DIO2,NLK,ETNK2,CD6,PDP1,PRKCB,CALM1,HKDC1,SLC39A10,WNT4,HEG1,WNT9A,PHOSPHO1,RASD1,DUSP7,TTLL11,ATP2B2,TRPC6,BAP1,DLG4,JDP2,CAMTA2,PAK1,CHST2,HERC6,FGF9,DPY19L1,CAMK4,WFS1,ADCY1,WSB2,CUX2,ATP1A1,ZMYND8,MAST3,TRIM37,CYFIP2,CCNG1,…
GO:BP	ERBB signaling pathway	GO:0038127	0.043328	1.36323	115	1390	18	27543	FBXW7,ADORA1,ERBB4,DAB2IP,RASSF2,PTK2,HBEGF,SRC,RBPJ,ZFYVE28,DUSP3,PTPRJ,NRG3,PDPK1,EGFR,PTPRF,SOX9,NEURL1A
GO:BP	ERK1 and ERK2 cascade	GO:0070371	0.0434394	1.36212	349	1390	37	27543	FBXW7,NRXN1,ERBB4,DAB2IP,BMPER,DUSP1,RASGRP1,RAMP3,NPTN,SIRPA,PRKCZ,FERMT2,FGFR3,PIN1,NDRG2,CXCL12,ARRB1,SRC,DUSP3,DUSP6,ITGAV,DLG1,SPRED1,CD44,PLA2G5,SPRY2,ADRA1A,EGFR,GCNT2,THPO,SOX9,EPHB1,BMP2,ACKR3,SYK,NOTCH1,EDNRA
GO:BP	cellular response to extracellular stimulus	GO:0031668	0.0435316	1.3612	270	1390	31	27543	WNT4,ATP2B1,TFRC,LRRK2,SLC1A2,FAM107A,BRSK2,FOXO3,PLEC,CLEC16A,PPARG,CPEB4,RNF152,BRSK1,PIM1,GAS2L1,MYOD1,FNIP1,SRF,ARHGAP35,SREBF2,AXL,PCSK9,SNW1,PPARA,ATF4,WIPI1,MED1,SLC38A3,KLF10,NUAK1
GO:BP	regulation of phosphoprotein phosphatase activity	GO:0043666	0.0438286	1.35824	56	1390	12	27543	CALM1,SLC39A10,CRY2,PPP1R9B,PPP1R1B,MAGI2,MGAT5,HTT,ROCK2,PPP6R1,MPRIP,NUAK1
GO:BP	proteasomal protein catabolic process	GO:0010498	0.0462205	1.33517	503	1390	48	27543	FBXW7,KCTD17,WFS1,DLGAP1,FBXL16,DAB2IP,MAP1A,RNF144A,HSPA1B,UBQLN4,ZNRF1,FBXO31,LRRK2,BRSK2,SGTB,HECW1,UBE2G1,MAPK9,NR1D1,ARRB1,CLEC16A,TRIB1,SDF2L1,NFE2L1,FBXO33,GIPC1,HECW2,TBL1XR1,HACE1,HERC2,RMND5A,DDIT3,VHL,RNF144B,DDI2,TRIM72,STT3B,FOXRED2,SMARCC1,FBXL15,WWTR1,FBXO27,FBXL19,UGGT1,AQP11,HERPUD1,ANKRD9,CDC34
GO:BP	cellular response to carbohydrate stimulus	GO:0071322	0.0471473	1.32654	184	1390	24	27543	PLCB1,PRKCB,PPP3CA,CDK16,EFNA5,BRSK2,GRIK5,FOXO3,NR1D1,PDE8B,PPARD,ARRB1,KCNJ11,PRKCE,RPS6KA2,TRPM4,SRF,UNC13B,SLC39A14,IGF1R,AQP4,NPTX1,SMARCA4,CRH
GO:BP	regulation of osteoblast differentiation	GO:0045667	0.0473338	1.32483	149	1390	21	27543	SMAD3,WNT4,PPP3CA,RASSF2,PTK2,FERMT2,HDAC4,CEBPA,ESRRA,TRPM4,GLI3,ATF4,AXIN2,CTHRC1,MEF2C,WNT7B,WWTR1,YAP1,SOX9,BMP2,NOTCH1
GO:BP	cerebellar cortex formation	GO:0021697	0.0480883	1.31796	32	1390	9	27543	WHRN,ATP2B2,RORA,NRXN1,CACNA1A,MTPN,HERC1,NFIX,AGTPBP1
GO:BP	long-term synaptic potentiation	GO:0060291	0.0487982	1.3116	246	1390	29	27543	SNAP25,GRIN2A,SLC24A2,ARC,ADCY1,ADORA1,PPP1R9A,PTN,SHANK3,NPTN,SYT12,FAM107A,PRKAR1B,PRKCZ,ADRB1,RELN,CRTC1,NTRK2,ZDHHC2,UNC13A,AKAP5,MPP2,IGSF11,CALB1,SHANK2,SLC8A2,HTR6,GRIN2C,CRH
GO:BP	molting cycle	GO:0042303	0.0488974	1.31071	116	1390	18	27543	MYO5A,EXT1,FZD3,ZDHHC21,RBPJ,LRP4,TNFRSF19,PTGS2,WNT10A,PER1,LGR4,EGFR,SOX18,SOX9,NOTCH1,HPSE,PTCH2,INHBA
GO:BP	hair cycle	GO:0042633	0.0488974	1.31071	116	1390	18	27543	MYO5A,EXT1,FZD3,ZDHHC21,RBPJ,LRP4,TNFRSF19,PTGS2,WNT10A,PER1,LGR4,EGFR,SOX18,SOX9,NOTCH1,HPSE,PTCH2,INHBA
GO:BP	regulation of striated muscle cell differentiation	GO:0051153	0.0490586	1.30929	95	1390	16	27543	MYLK3,HDAC4,PIN1,ADRB1,MAPK14,FOXP1,MYOD1,TRIM72,SOX6,PPARA,HOPX,MEF2C,AKAP6,BMP2,BDNF,NOTCH1
GO:BP	odontogenesis of dentin-containing tooth	GO:0042475	0.0490586	1.30929	95	1390	16	27543	NFIC,CTNNA2,HTRA1,ANKRD11,SMPD3,DMP1,LRP4,RELT,WNT10A,GLI3,PPARA,RSPO2,WNT7B,ADM,FAM20A,BMP2
GO:BP	synaptic vesicle membrane organization	GO:0048499	0.0491063	1.30886	25	1390	8	27543	SNAP25,CPLX2,STX1B,PRRT2,SYT1,STXBP1,GRIK5,CPLX1
GO:BP	reflex	GO:0060004	0.0491063	1.30886	25	1390	8	27543	SHANK1,GLRB,CACNG2,CACNA1A,ASCL1,AUTS2,ADRA1A,ALDH1A3
GO:BP	lipid localization	GO:0010876	0.0493425	1.30678	490	1390	47	27543	ANO3,STARD10,PITPNM2,ZDHHC8,AKT2,OSBP2,CRY2,CDS1,LCAT,ACSL6,TTC39B,SLCO2A1,MAPK9,OSBPL3,OSBPL1A,STARD3,PPARD,STARD4,PPARG,NPC1L1,ACVR1C,GRAMD1B,PTGS2,ITGAV,RBP4,ACSL3,CROT,EEPD1,B4GALNT1,LIPG,SREBF2,OSBPL6,PCSK9,OSBPL8,PLA2G5,PPARA,SLC4A1,ESYT1,ATP8B1,PLEKHA8,SIGMAR1,NRIP1,DRD4,SLCO1C1,SYK,CRH,INHBA
GO:BP	cellular response to peptide hormone stimulus	GO:0071375	0.0495842	1.30466	311	1390	34	27543	PLCB1,PRKCB,ATP2B1,AKT2,MYO5A,INPPL1,PRKCZ,PIP4K2C,PTK2,CPEB2,APC,SRC,ESRRA,ZBTB7B,MAS1,RAB31,CYP11A1,SLC39A14,GPT,IGF1R,SOCS3,PCSK9,TRIM72,SORL1,PDPK1,GPAM,OSBPL8,AKT3,PIK3R2,SMARCC1,PTPRF,INSIG1,EDNRA,GPR21
GO:CC	cell junction	GO:0030054	1.85e-88	87.7337	2117	1385	345	27317	LYNX1,MGLL,AFAP1L1,RPH3A,NRN1,GABRD,PLCB1,STARD8,DGKZ,SIPA1L1,GIT1,LZTS3,WHRN,ASAP1,LY6E,NOS1AP,GRM2,SNAP25,SYT2,SORBS2,GRIN2A,KCNC1,PRKCB,KCNA2,CALM1,OLFM1,PLCB4,STARD10,RIMS3,HEG1,KCNA1,ATP2B2,TRPC6,LASP1,DLG4,PACSIN1,PAK1,CAMK4,ARC,WFS1,ADCY1,ITPR1,ATP1A1,ZMYND8,CYFIP2,PPP3CA,BSN,DLGAP3,DLGAP1,CHRDL1,ATP2B1,SCN8A,RIMS1,GABRA1,ADORA1,FMN1,RTN4R,SYNDIG1,PIP5K1C,LYPD6,ABHD6,IQSEC2,ARHGEF9,AP1S1,C…
GO:CC	synapse	GO:0045202	2.27e-80	79.6439	1499	1385	275	27317	LYNX1,MGLL,RPH3A,NRN1,GABRD,PLCB1,DGKZ,SIPA1L1,GIT1,LZTS3,WHRN,ASAP1,LY6E,NOS1AP,GRM2,SNAP25,SYT2,SORBS2,GRIN2A,KCNC1,PRKCB,KCNA2,CALM1,OLFM1,PLCB4,RIMS3,KCNA1,ATP2B2,DLG4,PACSIN1,CAMK4,ARC,WFS1,ADCY1,ITPR1,ATP1A1,ZMYND8,CYFIP2,PPP3CA,BSN,DLGAP3,DLGAP1,CHRDL1,ATP2B1,RIMS1,GABRA1,ADORA1,RTN4R,SYNDIG1,PIP5K1C,LYPD6,ABHD6,IQSEC2,ARHGEF9,AP1S1,CACNB3,RGS7,PHACTR1,NRXN1,NETO2,PPP1R9A,RAB6B,SLC6A1,CDK1…
GO:CC	cytoplasm	GO:0005737	1.61e-73	72.7935	11416	1385	911	27317	LYNX1,MAPK4,MAP6D1,ARPP19,MGLL,ENDOU,AFAP1L1,RPH3A,PLCB1,FBXW7,CAMKK2,DGKZ,SIPA1L1,GIT1,LZTS3,WHRN,ASAP1,CCDC3,NOS1AP,SMAD3,RGS20,PTPN3,CUX1,KCTD1,MAPK6,KCTD17,ETL4,TNNC1,SNAP25,EVC2,TTC7B,ZNFX1,ZFP703,SYT2,ATF6,SORBS2,GRIN2A,NLK,ETNK2,PDP1,TUBA4A,ARPP21,PRKCB,KCNA2,CALM1,OLFM1,HKDC1,PLCB4,WNT4,STARD10,SLC13A5,RIMS3,KCNA1,RASD1,DUSP7,TTLL11,MYL4,ATP2B2,TRPC6,SEC14L1,BAP1,LASP1,DLG4,LRRC8B,PACSIN1…
GO:CC	neuron projection	GO:0043005	1.39e-66	65.8578	1578	1385	262	27317	LYNX1,MGLL,RPH3A,ADCY9,GABRD,CAMKK2,SIPA1L1,GIT1,LZTS3,WHRN,ASAP1,GRM2,SNAP25,SORBS2,GRIN2A,KCNC1,PRKCB,KCNA2,CALM1,OLFM1,PLCB4,KCNA1,CACNA1I,ATP2B2,DLG4,PACSIN1,BRINP1,ARC,WFS1,ITPR1,ATP1A1,ZMYND8,CYFIP2,CCNG1,PPP3CA,BSN,DLGAP3,RAP1GAP2,ATP2B1,KIF5C,GABRA1,ADORA1,ACAP3,RTN4R,LMTK2,SYNDIG1,LYPD6,AP1S1,RGS7,NRXN1,PPP1R9A,FAM168B,SLC6A1,CDK16,GRIA4,SORT1,ERBB4,CDK5R2,CPLX2,DAB2IP,STX1B,KCNIP3,MYO5A…
GO:CC	plasma membrane bounded cell projection	GO:0120025	1.52e-63	62.819	2437	1385	331	27317	LYNX1,MGLL,RPH3A,C130074G19RIK,ADCY9,GABRD,CAMKK2,DGKZ,SIPA1L1,GIT1,LZTS3,WHRN,ASAP1,GRM2,SNAP25,EVC2,SORBS2,GRIN2A,KCNC1,PRKCB,KCNA2,CALM1,OLFM1,PLCB4,STARD10,KCNA1,CACNA1I,TTLL11,ATP2B2,DLG4,PACSIN1,PAK1,BRINP1,ARC,WFS1,ITPR1,ATP1A1,ZMYND8,PLXND1,CYFIP2,CCNG1,PPP3CA,BSN,DLGAP3,RAP1GAP2,ATP2B1,KIF5C,GABRA1,ADORA1,ACAP3,RTN4R,LMTK2,SYNDIG1,PIP5K1C,LYPD6,AP1S1,RGS7,NRXN1,TBC1D30,PPP1R9A,FAM168B,SL…
GO:CC	cell projection	GO:0042995	3.79e-63	62.421	2533	1385	338	27317	LYNX1,MGLL,AFAP1L1,RPH3A,C130074G19RIK,ADCY9,GABRD,CAMKK2,DGKZ,SIPA1L1,GIT1,LZTS3,WHRN,ASAP1,GRM2,SNAP25,EVC2,SORBS2,GRIN2A,KCNC1,PRKCB,KCNA2,CALM1,OLFM1,PLCB4,STARD10,KCNA1,CACNA1I,TTLL11,ATP2B2,DLG4,PACSIN1,PAK1,BRINP1,ARC,WFS1,ITPR1,ATP1A1,ZMYND8,PLXND1,CYFIP2,CCNG1,PPP3CA,BSN,DLGAP3,RAP1GAP2,ATP2B1,KIF5C,GABRA1,ADORA1,ACAP3,RTN4R,LMTK2,SYNDIG1,PIP5K1C,LYPD6,AP1S1,RGS7,NRXN1,TBC1D30,PPP1R9A,FA…
GO:CC	postsynapse	GO:0098794	5.46e-62	61.263	753	1385	171	27317	RPH3A,GABRD,PLCB1,DGKZ,SIPA1L1,GIT1,LZTS3,WHRN,ASAP1,NOS1AP,GRM2,SNAP25,SORBS2,GRIN2A,KCNC1,PLCB4,RIMS3,KCNA1,ATP2B2,DLG4,PACSIN1,CAMK4,ARC,ADCY1,ITPR1,ATP1A1,ZMYND8,PPP3CA,BSN,DLGAP3,DLGAP1,ATP2B1,GABRA1,ADORA1,SYNDIG1,PIP5K1C,ABHD6,ARHGEF9,RGS7,NETO2,PPP1R9A,SLC6A1,GRIA4,ERBB4,SYNE1,CPLX2,MYO5A,IQSEC1,PTN,SHANK1,RAPGEF4,SPTBN2,GABRB2,MAP1A,FARP1,SLC1A3,DAGLB,RGS7BP,PPP3R1,PRRT2,DMTN,CLSTN1,ABHD…
GO:CC	somatodendritic compartment	GO:0036477	1.03e-58	57.9877	1081	1385	202	27317	LYNX1,RPH3A,ADCY9,GABRD,SIPA1L1,LZTS3,WHRN,ASAP1,GRM2,SNAP25,SORBS2,GRIN2A,KCNC1,KCNA2,OLFM1,PLCB4,KCNA1,ATP2B2,DLG4,BRINP1,ARC,WFS1,ITPR1,ZMYND8,CCNG1,PPP3CA,BSN,DLGAP3,ATP2B1,KIF5C,GABRA1,ADORA1,RTN4R,LMTK2,ASTN2,SYNDIG1,RGS7,NRXN1,PPP1R9A,SLC6A1,RBFOX3,GRIA4,SORT1,ERBB4,CPLX2,DAB2IP,KCNIP3,MYO5A,SHANK1,RAPGEF4,BRINP2,SPTBN2,OSBP2,MAP1A,FARP1,SLC1A3,MPL,RGS7BP,PRRT2,RTN4RL1,KCNH1,CLSTN1,ABHD17A…
GO:CC	glutamatergic synapse	GO:0098978	1.21e-57	56.9183	480	1385	132	27317	NRN1,GABRD,PLCB1,DGKZ,SIPA1L1,GIT1,NOS1AP,SNAP25,GRIN2A,OLFM1,PLCB4,RIMS3,KCNA1,ATP2B2,DLG4,PACSIN1,CAMK4,ARC,ADCY1,PPP3CA,BSN,DLGAP3,DLGAP1,ATP2B1,RTN4R,PIP5K1C,ABHD6,RGS7,NRXN1,PPP1R9A,GRIA4,ERBB4,CPLX2,MYO5A,IQSEC1,SHANK1,RAPGEF4,SPTBN2,FARP1,RGS7BP,PPP3R1,PRRT2,PTPRD,CLSTN1,ABHD17A,SYT1,CNKSR2,RIMS4,SHANK3,HOMER1,NPTN,LRRK2,SLC1A2,ERC2,PRKAR1B,PRKCZ,APBB1,PTPRT,NRCAM,PTK2,GRIN1,ADRA2C,STXBP1,…
GO:CC	cell periphery	GO:0071944	3.79e-53	52.4216	6988	1385	617	27317	LYNX1,ADRA1D,RPH3A,NRN1,ADCY9,GABRD,PLCB1,ANO3,DGKZ,SIPA1L1,WHRN,ASAP1,LY6E,NOS1AP,SMAD3,PTPN3,GRM2,GFRA2,SNAP25,EVC2,TTC7B,SORBS2,GRIN2A,KCNC1,CD6,PRKCB,KCNA2,CALM1,OLFM1,SLC39A10,WNT4,SLC13A5,RIMS3,HEG1,PHOSPHO1,KCNA1,SLC24A2,RASD1,CACNA1I,LINGO1,ATP2B2,TRPC6,LASP1,DLG4,SCUBE1,LRRC8B,PACSIN1,PAK1,FGF9,ARC,ADCY1,ITPR1,NTN5,ATP1A1,GPM6B,PLXND1,CRIP2,LINGO3,PPP3CA,BSN,DLGAP3,RAP1GAP2,DLGAP1,CHRDL1…
GO:CC	membrane	GO:0016020	8.03e-52	51.0953	10261	1385	798	27317	LYNX1,MGLL,ENDOU,ADRA1D,RPH3A,NRN1,C130074G19RIK,ADCY9,GABRD,PLCB1,FBXW7,ANO3,DGKZ,SIPA1L1,WHRN,ASAP1,TMEM132D,LY6E,NOS1AP,SMAD3,RGS20,PTPN3,CUX1,GRM2,GFRA2,SNAP25,EVC2,TTC7B,ZNFX1,SYT2,ATF6,SORBS2,GRIN2A,DIO2,KCNC1,CD6,PRKCB,KCNA2,CALM1,OLFM1,HKDC1,SLC39A10,STARD10,SLC13A5,RIMS3,HEG1,KCNA1,SLC24A2,RASD1,CACNA1I,LINGO1,ATP2B2,TRPC6,BAP1,DLG4,SCUBE1,LRRC8B,PACSIN1,PITPNM2,PAK1,CHST2,DPY19L1,ARC,WF…
GO:CC	dendrite	GO:0030425	3.03e-49	48.5186	779	1385	157	27317	LYNX1,RPH3A,ADCY9,GABRD,SIPA1L1,LZTS3,WHRN,ASAP1,GRM2,SORBS2,GRIN2A,KCNC1,KCNA2,PLCB4,KCNA1,ATP2B2,DLG4,BRINP1,ARC,WFS1,ITPR1,ZMYND8,CCNG1,PPP3CA,BSN,DLGAP3,ATP2B1,KIF5C,GABRA1,ADORA1,RTN4R,SYNDIG1,RGS7,PPP1R9A,GRIA4,SORT1,ERBB4,CPLX2,DAB2IP,KCNIP3,MYO5A,SHANK1,RAPGEF4,BRINP2,OSBP2,MAP1A,FARP1,SLC1A3,RGS7BP,PRRT2,KCNH1,CLSTN1,ABHD17A,GLRB,SHANK3,HOMER1,JPH4,NPTN,LRRK2,SLC1A2,PPP1R9B,SLC12A5,APBB1…
GO:CC	dendritic tree	GO:0097447	4.32e-49	48.3644	781	1385	157	27317	LYNX1,RPH3A,ADCY9,GABRD,SIPA1L1,LZTS3,WHRN,ASAP1,GRM2,SORBS2,GRIN2A,KCNC1,KCNA2,PLCB4,KCNA1,ATP2B2,DLG4,BRINP1,ARC,WFS1,ITPR1,ZMYND8,CCNG1,PPP3CA,BSN,DLGAP3,ATP2B1,KIF5C,GABRA1,ADORA1,RTN4R,SYNDIG1,RGS7,PPP1R9A,GRIA4,SORT1,ERBB4,CPLX2,DAB2IP,KCNIP3,MYO5A,SHANK1,RAPGEF4,BRINP2,OSBP2,MAP1A,FARP1,SLC1A3,RGS7BP,PRRT2,KCNH1,CLSTN1,ABHD17A,GLRB,SHANK3,HOMER1,JPH4,NPTN,LRRK2,SLC1A2,PPP1R9B,SLC12A5,APBB1…
GO:CC	cellular anatomical entity	GO:0110165	4.19e-45	44.3779	22745	1385	1324	27317	LYNX1,MAPK4,MAP6D1,SCRT1,ARPP19,MGLL,ENDOU,TTL,AFAP1L1,ADRA1D,RPH3A,NRN1,C130074G19RIK,ADCY9,GABRD,PLCB1,STARD8,FBXW7,ANO3,CAMKK2,DGKZ,SIPA1L1,NFIC,GIT1,LZTS3,WHRN,ZFPM1,ASAP1,LGI2,CCDC3,TMEM132D,LY6E,NOS1AP,SMAD3,RGS20,PTPN3,CUX1,KCTD1,GRM2,MAPK6,GFRA2,KCTD17,ETL4,TNNC1,SNAP25,EVC2,TTC7B,ZNFX1,ZFP703,SYT2,ATF6,SORBS2,GRIN2A,DIO2,KCNC1,NLK,NBL1,ETNK2,CD6,PDP1,TUBA4A,ARPP21,PRKCB,KCNA2,CALM1,OLFM1…
[truncated: 750 more rows]
