# Supplementary material for: Identifying Disease Signatures in the Spinocerebellar Ataxia Type 1 Mouse Cortex
Source: Cells. 2022 Aug 24;11(17):2632. doi: 10.3390/cells11172632 (PMC9454518; doi:10.3390/cells11172632)
Supplement: Supplementary file 1 [file cells-11-02632-s001.zip › Luttik et al._Table S3 [GO terms for upregulated DEGs in SCA1 cortex].xlsx]

## Sheet: Cortex- Upregulated in SCA1 KI 
source	term_name	term_id	adjusted_p_value	negative_log10_of_adjusted_p_value	term_size	query_size	intersection_size	effective_domain_size	intersections
GO:MF	binding	GO:0005488	4.25787e-25	24.3708	16232	638	531	25412	ONECUT2,SFMBT2,TWIST1,FHL1,ECE2,GPRASP1,PAX2,LGALS8,GPRASP2,RIMKLB,USP11,ASL,RGS13,EMID1,EBF4,PNCK,GDI1,EN2,OPTN,NDN,ZFP503,PNMA3,GAP43,CDH18,TUBB2A,TSPYL2,ASH2L,KLHL4,ZCCHC18,ACOT7,NRIP2,DYNC1I1,ZSCAN18,SAMD14,PAFAH1B3,DGKA,ARL10,SMC4,TFAP2A,TBKBP1,BEX1,UCMA,MAGED1,PSME1,SCAPER,COL5A3,SKOR1,DPYSL5,ANAPC5,GSPT2,WDR6,SKAP2,SRSF5,HSP90AA1,EEF1A1,RAB34,RANBP17,FKBP14,SMARCA1,FAF1,EIF2S3Y,PRMT2,SOX3,…
GO:MF	catalytic activity	GO:0003824	5.99006e-18	17.2226	5730	638	247	25412	ECE2,RIMKLB,USP11,ASL,PNCK,TUBB2A,ASH2L,ACOT7,NRIP2,PAFAH1B3,DGKA,ARL10,SMC4,DPYSL5,GSPT2,HSP90AA1,EEF1A1,RAB34,FKBP14,SMARCA1,EIF2S3Y,TRMT2B,PRMT2,HSP90AB1,HSDL1,CCT3,DPYSL3,APEH,ELAC1,SAT2,MMAB,MACROD1,REM2,ACHE,PRPS1L3,NT5E,RRAGB,RIT2,HSD17B11,SAMHD1,RHOU,OTOGL,GPI1,STK3,CYB5R1,PRSS16,ACADVL,DUS2,HS6ST2,TAOK3,RNF25,MAOA,NAGK,UCKL1,CCT5,ADAM15,DPP7,NRBP1,RRM2B,GAA,SUV39H1,GGACT,RAB27A,LTA4H,PRI…
GO:MF	protein binding	GO:0005515	1.8071e-17	16.743	10481	638	377	25412	SFMBT2,TWIST1,FHL1,GPRASP1,LGALS8,GPRASP2,USP11,ASL,RGS13,EMID1,PNCK,GDI1,OPTN,NDN,GAP43,CDH18,TSPYL2,ASH2L,KLHL4,ACOT7,NRIP2,DYNC1I1,SAMD14,PAFAH1B3,SMC4,TBKBP1,BEX1,UCMA,MAGED1,PSME1,COL5A3,SKOR1,DPYSL5,ANAPC5,WDR6,SKAP2,SRSF5,HSP90AA1,EEF1A1,RAB34,RANBP17,SMARCA1,FAF1,PRMT2,HSP90AB1,CCT3,GRB10,RDX,DPYSL3,APEH,SNCAIP,STIL,SAT2,SEC24D,ACHE,PRPS1L3,NFYA,WDR41,STAT6,NINJ1,SRSF2,BBS2,RRAGB,RIT2,ARM…
GO:MF	ion binding	GO:0043167	2.00658e-15	14.6975	5914	638	245	25412	FHL1,ECE2,RIMKLB,EBF4,PNCK,OPTN,ZFP503,PNMA3,GAP43,CDH18,TUBB2A,ASH2L,ZCCHC18,ZSCAN18,DGKA,ARL10,SMC4,TBKBP1,SCAPER,GSPT2,HSP90AA1,EEF1A1,RAB34,FKBP14,SMARCA1,EIF2S3Y,HSP90AB1,CCT3,ZFP28,ELAC1,SAT2,MMAB,ZMAT1,REM2,SEC24D,ACHE,PRPS1L3,CGREF1,NT5E,RRAGB,ZFP157,RIT2,SAMHD1,RHOU,STK3,CYB5R1,ACADVL,DUS2,TAOK3,RNF25,MAOA,NAGK,UCKL1,CCT5,ADAM15,MID2,NRBP1,RRM2B,SUV39H1,PGRMC1,RAB27A,LTA4H,PRIM1,DMRT2,MA…
GO:MF	heterocyclic compound binding	GO:1901363	1.89745e-12	11.7218	6837	638	262	25412	ONECUT2,TWIST1,PAX2,RIMKLB,EBF4,PNCK,EN2,NDN,PNMA3,TUBB2A,ASH2L,ACOT7,ZSCAN18,DGKA,ARL10,SMC4,TFAP2A,SCAPER,SKOR1,GSPT2,SRSF5,HSP90AA1,EEF1A1,RAB34,SMARCA1,EIF2S3Y,SOX3,HSP90AB1,CCT3,ZFP28,MMAB,ZMAT1,REM2,PRPS1L3,NFYA,NT5E,STAT6,IRX5,SRSF2,RRAGB,ZFP157,CDC45,RIT2,SAMHD1,RHOU,STK3,ORC3,CYB5R1,ACADVL,DUS2,TAOK3,MAOA,NAGK,UCKL1,CCT5,CENPC1,NRBP1,CREB3L3,DLX4,SUV39H1,PGRMC1,RAB27A,DLX2,PRIM1,TERF2IP,…
GO:MF	organic cyclic compound binding	GO:0097159	1.62562e-11	10.789	6918	638	261	25412	ONECUT2,TWIST1,PAX2,RIMKLB,EBF4,PNCK,EN2,NDN,PNMA3,TUBB2A,ASH2L,ACOT7,ZSCAN18,DGKA,ARL10,SMC4,TFAP2A,SCAPER,SKOR1,GSPT2,SRSF5,HSP90AA1,EEF1A1,RAB34,SMARCA1,EIF2S3Y,SOX3,HSP90AB1,CCT3,ZFP28,MMAB,ZMAT1,REM2,PRPS1L3,NFYA,NT5E,STAT6,IRX5,SRSF2,RRAGB,ZFP157,CDC45,RIT2,SAMHD1,RHOU,STK3,ORC3,CYB5R1,ACADVL,DUS2,TAOK3,MAOA,NAGK,UCKL1,CCT5,CENPC1,NRBP1,CREB3L3,DLX4,SUV39H1,PGRMC1,RAB27A,DLX2,PRIM1,TERF2IP,…
GO:MF	DNA binding	GO:0003677	4.23136e-11	10.3735	2406	638	121	25412	ONECUT2,TWIST1,PAX2,EBF4,EN2,NDN,ASH2L,ZSCAN18,SMC4,TFAP2A,SKOR1,SMARCA1,SOX3,ZFP28,NFYA,STAT6,IRX5,ZFP157,CDC45,SAMHD1,ORC3,CENPC1,CREB3L3,DLX4,SUV39H1,DLX2,TERF2IP,DMRT2,MLH3,STAT4,TELO2,PHF1,MYEF2,ZFP955A,HDAC1,ZFP229,SIM1,HOXD8,HDAC2,AIFM2,LIN28B,2610008E11RIK,LBX1,ZFP90,ZFP383,ZFP3,GTF3C6,TOP1MT,ZFP711,CCAR1,ZFP273,BARX1,MED12,ZFP92,EN1,ZFP712,IRX2,THAP3,FOXB1,IRX3,HOXC4,TBX2,PGBD1,VAX2,PAX3…
GO:MF	nucleotide binding	GO:0000166	1.4091e-10	9.85106	2188	638	112	25412	RIMKLB,PNCK,TUBB2A,ACOT7,DGKA,ARL10,SMC4,GSPT2,HSP90AA1,EEF1A1,RAB34,SMARCA1,EIF2S3Y,HSP90AB1,CCT3,MMAB,REM2,PRPS1L3,NT5E,RRAGB,RIT2,SAMHD1,RHOU,STK3,CYB5R1,ACADVL,DUS2,TAOK3,MAOA,NAGK,UCKL1,CCT5,NRBP1,RAB27A,PRIM1,MAPK3,STK33,MLH3,TUBA1A,FPGS,HCN3,ABCA8A,GPN3,MAST1,AIFM2,HSPA8,CCT2,ABCB10,VDAC3,CHTF18,ILK,TXNRD3,LATS2,ATAD3A,RAB37,CCT8,COQ6,PGD,HFM1,AHCY,ABCB6,CTBP2,CLCN5,MCCC2,SIRT1,ABCD4,SIRT5…
GO:MF	nucleoside phosphate binding	GO:1901265	1.4091e-10	9.85106	2188	638	112	25412	RIMKLB,PNCK,TUBB2A,ACOT7,DGKA,ARL10,SMC4,GSPT2,HSP90AA1,EEF1A1,RAB34,SMARCA1,EIF2S3Y,HSP90AB1,CCT3,MMAB,REM2,PRPS1L3,NT5E,RRAGB,RIT2,SAMHD1,RHOU,STK3,CYB5R1,ACADVL,DUS2,TAOK3,MAOA,NAGK,UCKL1,CCT5,NRBP1,RAB27A,PRIM1,MAPK3,STK33,MLH3,TUBA1A,FPGS,HCN3,ABCA8A,GPN3,MAST1,AIFM2,HSPA8,CCT2,ABCB10,VDAC3,CHTF18,ILK,TXNRD3,LATS2,ATAD3A,RAB37,CCT8,COQ6,PGD,HFM1,AHCY,ABCB6,CTBP2,CLCN5,MCCC2,SIRT1,ABCD4,SIRT5…
GO:MF	sequence-specific DNA binding	GO:0043565	9.34076e-10	9.02962	1607	638	89	25412	ONECUT2,TWIST1,PAX2,EBF4,EN2,NDN,ASH2L,ZSCAN18,SKOR1,SOX3,ZFP28,NFYA,STAT6,IRX5,ZFP157,CDC45,ORC3,CENPC1,CREB3L3,DLX4,SUV39H1,DLX2,TERF2IP,DMRT2,MLH3,TELO2,MYEF2,ZFP955A,HDAC1,ZFP229,SIM1,HOXD8,HDAC2,LIN28B,2610008E11RIK,LBX1,ZFP90,ZFP383,ZFP3,ZFP711,CCAR1,ZFP273,BARX1,MED12,ZFP92,EN1,ZFP712,IRX2,FOXB1,IRX3,HOXC4,TBX2,PGBD1,VAX2,PAX3,SIRT1,ZFP866,TFAP4,ZFP647,ZFP692,HNRNPA2B1,ZFP53,NHLH2,MEIS1,LH…
GO:MF	sequence-specific double-stranded DNA binding	GO:1990837	9.55696e-08	7.01968	1502	638	80	25412	ONECUT2,TWIST1,PAX2,EBF4,EN2,NDN,ASH2L,ZSCAN18,SKOR1,SOX3,ZFP28,NFYA,STAT6,IRX5,ZFP157,CDC45,ORC3,CENPC1,CREB3L3,DLX4,SUV39H1,DLX2,DMRT2,MLH3,MYEF2,ZFP955A,HDAC1,ZFP229,SIM1,HOXD8,LIN28B,2610008E11RIK,LBX1,ZFP90,ZFP383,ZFP3,CCAR1,ZFP273,BARX1,MED12,ZFP92,EN1,ZFP712,IRX2,FOXB1,IRX3,HOXC4,TBX2,VAX2,PAX3,SIRT1,ZFP866,TFAP4,ZFP647,ZFP692,ZFP53,NHLH2,MEIS1,LHX5,HNF1B,MYBL1,PAX7,TRP53,LHX4,ZFP184,ZFP51…
GO:MF	cation binding	GO:0043169	1.35831e-07	6.867	4191	638	167	25412	FHL1,ECE2,RIMKLB,EBF4,OPTN,ZFP503,PNMA3,CDH18,ASH2L,ZCCHC18,ZSCAN18,DGKA,TBKBP1,SCAPER,FKBP14,ZFP28,ELAC1,SAT2,ZMAT1,SEC24D,ACHE,PRPS1L3,CGREF1,NT5E,ZFP157,SAMHD1,RHOU,STK3,RNF25,MAOA,ADAM15,MID2,RRM2B,SUV39H1,PGRMC1,LTA4H,PRIM1,DMRT2,RNF2,PHF1,PRPSAP1,ZFP955A,FPGS,HDAC1,ZFP229,HDAC2,SPARC,METAP1D,MAST1,LIN28B,2610008E11RIK,CHRNB2,ZFP90,SHARPIN,TATDN3,SETD6,ALOXE3,ZFP383,ZFP3,ZFP711,PCDH11X,LATS2…
GO:MF	double-stranded DNA binding	GO:0003690	1.54882e-07	6.81	1601	638	83	25412	ONECUT2,TWIST1,PAX2,EBF4,EN2,NDN,ASH2L,ZSCAN18,SKOR1,SOX3,ZFP28,NFYA,STAT6,IRX5,ZFP157,CDC45,ORC3,CENPC1,CREB3L3,DLX4,SUV39H1,DLX2,DMRT2,MLH3,MYEF2,ZFP955A,HDAC1,ZFP229,SIM1,HOXD8,LIN28B,2610008E11RIK,LBX1,ZFP90,ZFP383,ZFP3,CCAR1,ZFP273,BARX1,MED12,ZFP92,EN1,ZFP712,IRX2,FOXB1,IRX3,HOXC4,TBX2,VAX2,PAX3,SIRT1,ZFP866,TFAP4,ZFP647,ZFP692,ZFP53,NHLH2,MEIS1,LHX5,HNF1B,MYBL1,PAX7,TRP53,LHX4,ZFP184,PRKDC…
GO:MF	hydrolase activity	GO:0016787	2.06408e-07	6.68527	2460	638	112	25412	ECE2,USP11,TUBB2A,ACOT7,NRIP2,PAFAH1B3,ARL10,SMC4,DPYSL5,GSPT2,HSP90AA1,EEF1A1,RAB34,SMARCA1,EIF2S3Y,HSP90AB1,CCT3,DPYSL3,APEH,ELAC1,MACROD1,REM2,ACHE,NT5E,RRAGB,RIT2,SAMHD1,RHOU,OTOGL,PRSS16,CCT5,ADAM15,DPP7,GAA,RAB27A,LTA4H,INPP5F,MLH3,TUBA1A,HDAC1,GPN3,HDAC2,METAP1D,HSPA8,SGSH,KHNYN,PRUNE2,CCT2,ABCB10,TATDN3,CHTF18,ATIC,DIS3,H13,ATAD3A,RAB37,CCT8,ABHD14B,HFM1,AHCY,ABCB6,AMY1,SIRT1,PTPRR,MAN2C1…
GO:MF	small molecule binding	GO:0036094	2.5851e-07	6.58752	2561	638	115	25412	RIMKLB,PNCK,TUBB2A,ACOT7,DGKA,ARL10,SMC4,GSPT2,HSP90AA1,EEF1A1,RAB34,SMARCA1,EIF2S3Y,HSP90AB1,CCT3,MMAB,REM2,PRPS1L3,NT5E,RRAGB,RIT2,SAMHD1,RHOU,GPI1,STK3,CYB5R1,ACADVL,DUS2,TAOK3,MAOA,NAGK,UCKL1,CCT5,NRBP1,RAB27A,PRIM1,MAPK3,STK33,MLH3,TUBA1A,TRPC4,FPGS,HCN3,ABCA8A,GPN3,MAST1,AIFM2,HSPA8,CCT2,ABCB10,VDAC3,CHTF18,ILK,TXNRD3,LATS2,ATAD3A,RAB37,CCT8,COQ6,PGD,HFM1,AHCY,ABCB6,CTBP2,CLCN5,MCCC2,SIRT1,…
GO:MF	metal ion binding	GO:0046872	1.49192e-06	5.82625	4091	638	160	25412	FHL1,ECE2,RIMKLB,EBF4,OPTN,ZFP503,PNMA3,CDH18,ASH2L,ZCCHC18,ZSCAN18,DGKA,TBKBP1,SCAPER,FKBP14,ZFP28,ELAC1,ZMAT1,SEC24D,PRPS1L3,CGREF1,NT5E,ZFP157,SAMHD1,RHOU,STK3,RNF25,ADAM15,MID2,RRM2B,SUV39H1,PGRMC1,LTA4H,PRIM1,DMRT2,RNF2,PHF1,PRPSAP1,ZFP955A,FPGS,HDAC1,ZFP229,HDAC2,SPARC,METAP1D,MAST1,LIN28B,2610008E11RIK,ZFP90,SHARPIN,TATDN3,ALOXE3,ZFP383,ZFP3,ZFP711,PCDH11X,LATS2,ZFP273,CYP4V3,ZFP92,ZC4H2,M…
GO:MF	RNA polymerase II transcription regulatory region sequence-specific DNA binding	GO:0000977	2.23494e-06	5.65073	1327	638	70	25412	ONECUT2,TWIST1,EBF4,EN2,NDN,ZSCAN18,SKOR1,ZFP28,NFYA,STAT6,IRX5,ZFP157,CREB3L3,DLX4,SUV39H1,DLX2,DMRT2,MYEF2,ZFP955A,HDAC1,ZFP229,SIM1,HOXD8,2610008E11RIK,ZFP90,ZFP383,ZFP3,CCAR1,ZFP273,BARX1,MED12,ZFP92,EN1,ZFP712,IRX2,FOXB1,IRX3,HOXC4,TBX2,VAX2,PAX3,SIRT1,ZFP866,TFAP4,ZFP647,ZFP692,ZFP53,NHLH2,MEIS1,LHX5,HNF1B,MYBL1,PAX7,TRP53,LHX4,ZFP184,ZFP516,MYCL,ZFP677,TCF24,AW146154,H3F3B,LHX1,POU4F2,ZFP4…
GO:MF	transcription regulator activity	GO:0140110	2.25931e-06	5.64602	1811	638	87	25412	ONECUT2,SFMBT2,TWIST1,PAX2,EBF4,EN2,NDN,ZSCAN18,TFAP2A,MAGED1,SKOR1,PRMT2,SOX3,ZFP28,NFYA,STAT6,IRX5,ZFP157,MID2,CREB3L3,DLX4,DLX2,DMRT2,STAT4,MYEF2,ZFP955A,HDAC1,ZFP229,SIM1,HOXD8,2610008E11RIK,LBX1,ZFP90,ZFP383,ZFP3,CCAR1,ZFP273,BARX1,MED12,ZFP92,EN1,ZFP712,IRX2,FOXB1,IRX3,HOXC4,TAF15,CTBP2,TBX2,VAX2,PAX3,SIRT1,ZFP866,WTIP,TFAP4,ZFP647,ZFP692,TRIM27,ZFP53,NHLH2,MEIS1,LHX5,DMAP1,HNF1B,MYBL1,PAX7…
GO:MF	transcription regulatory region nucleic acid binding	GO:0001067	3.7722e-06	5.42341	1428	638	73	25412	ONECUT2,TWIST1,PAX2,EBF4,EN2,NDN,ASH2L,ZSCAN18,SKOR1,ZFP28,NFYA,STAT6,IRX5,ZFP157,CREB3L3,DLX4,SUV39H1,DLX2,DMRT2,MYEF2,ZFP955A,HDAC1,ZFP229,SIM1,HOXD8,2610008E11RIK,ZFP90,ZFP383,ZFP3,CCAR1,ZFP273,BARX1,MED12,ZFP92,EN1,ZFP712,IRX2,FOXB1,IRX3,HOXC4,TBX2,VAX2,PAX3,SIRT1,ZFP866,TFAP4,ZFP647,ZFP692,HNRNPA2B1,ZFP53,NHLH2,MEIS1,LHX5,HNF1B,MYBL1,PAX7,TRP53,LHX4,ZFP184,ZFP516,MYCL,ZFP677,TCF24,AW146154,H…
GO:MF	transcription cis-regulatory region binding	GO:0000976	7.58965e-06	5.11978	1424	638	72	25412	ONECUT2,TWIST1,PAX2,EBF4,EN2,NDN,ASH2L,ZSCAN18,SKOR1,ZFP28,NFYA,STAT6,IRX5,ZFP157,CREB3L3,DLX4,SUV39H1,DLX2,DMRT2,MYEF2,ZFP955A,HDAC1,ZFP229,SIM1,HOXD8,2610008E11RIK,ZFP90,ZFP383,ZFP3,CCAR1,ZFP273,BARX1,MED12,ZFP92,EN1,ZFP712,IRX2,FOXB1,IRX3,HOXC4,TBX2,VAX2,PAX3,SIRT1,ZFP866,TFAP4,ZFP647,ZFP692,ZFP53,NHLH2,MEIS1,LHX5,HNF1B,MYBL1,PAX7,TRP53,LHX4,ZFP184,ZFP516,MYCL,ZFP677,TCF24,AW146154,H3F3B,LHX1,…
GO:MF	DNA-binding transcription factor activity	GO:0003700	1.45414e-05	4.83739	1362	638	69	25412	ONECUT2,TWIST1,PAX2,EBF4,EN2,NDN,ZSCAN18,TFAP2A,SKOR1,SOX3,ZFP28,NFYA,STAT6,IRX5,ZFP157,CREB3L3,DLX4,DLX2,DMRT2,STAT4,MYEF2,ZFP955A,ZFP229,SIM1,HOXD8,2610008E11RIK,LBX1,ZFP90,ZFP383,ZFP3,ZFP273,BARX1,ZFP92,EN1,ZFP712,IRX2,FOXB1,IRX3,HOXC4,TBX2,VAX2,PAX3,ZFP866,TFAP4,ZFP647,ZFP692,ZFP53,NHLH2,MEIS1,LHX5,HNF1B,MYBL1,PAX7,TRP53,LHX4,ZFP184,ZFP516,MYCL,ZFP677,TCF24,AW146154,LHX1,POU4F2,ZFP446,ZFP449,…
GO:MF	anion binding	GO:0043168	1.60519e-05	4.79447	2439	638	105	25412	RIMKLB,PNCK,GAP43,TUBB2A,DGKA,ARL10,SMC4,GSPT2,HSP90AA1,EEF1A1,RAB34,SMARCA1,EIF2S3Y,HSP90AB1,CCT3,MMAB,REM2,PRPS1L3,RRAGB,RIT2,SAMHD1,RHOU,STK3,CYB5R1,ACADVL,DUS2,TAOK3,MAOA,NAGK,UCKL1,CCT5,NRBP1,RAB27A,MAPK3,STK33,MLH3,TUBA1A,TRPC4,FPGS,HCN3,ABCA8A,GPN3,MAST1,AIFM2,HSPA8,CCT2,ABCB10,CHTF18,ILK,TXNRD3,LATS2,ATAD3A,RAB37,RAPGEF6,CCT8,COQ6,PGD,HFM1,GSTP1,ABCB6,CLCN5,MCCC2,AMY1,SIRT1,GSTM4,ABCD4,SI…
GO:MF	DNA-binding transcription factor activity, RNA polymerase II-specific	GO:0000981	1.84858e-05	4.73316	1286	638	66	25412	ONECUT2,TWIST1,EBF4,EN2,NDN,ZSCAN18,SKOR1,SOX3,ZFP28,NFYA,STAT6,IRX5,ZFP157,CREB3L3,DLX4,DLX2,DMRT2,MYEF2,ZFP955A,ZFP229,SIM1,HOXD8,2610008E11RIK,LBX1,ZFP90,ZFP383,ZFP3,ZFP273,BARX1,ZFP92,EN1,ZFP712,IRX2,FOXB1,IRX3,HOXC4,TBX2,VAX2,PAX3,ZFP866,TFAP4,ZFP647,ZFP692,ZFP53,NHLH2,MEIS1,LHX5,HNF1B,MYBL1,PAX7,TRP53,LHX4,ZFP184,ZFP516,MYCL,ZFP677,TCF24,AW146154,LHX1,POU4F2,ZFP446,ZFP449,HOXB2,OTP,TRP73,ZF…
GO:MF	identical protein binding	GO:0042802	2.2152e-05	4.65459	2299	638	100	25412	TWIST1,ASL,OPTN,ACOT7,PAFAH1B3,MAGED1,HSP90AA1,EEF1A1,PRMT2,HSP90AB1,GRB10,DPYSL3,APEH,SNCAIP,STIL,SAT2,ACHE,PRPS1L3,STAT6,SAMHD1,GKAP1,STK3,ACADVL,TMEM43,CENPC1,MID2,NRBP1,CREB3L3,RRM2B,PGRMC1,MRI1,DMRT2,MAPK3,INPP5F,STAT4,TUBA1A,PHF1,PRPSAP1,PRDX3,HEXIM2,C1QTNF2,ABCB10,PRKRA,SHARPIN,HOOK2,ATIC,CEP57,MTSS1,ARRDC1,PSME2,H13,ATAD3A,AHCY,CTBP2,CLCN5,PGBD1,PRPSAP2,SIRT1,GSTM4,EFEMP2,HARS,HARS2,HTRA2…
GO:MF	pyrophosphatase activity	GO:0016462	4.61106e-05	4.3362	725	638	44	25412	TUBB2A,ARL10,SMC4,GSPT2,HSP90AA1,EEF1A1,RAB34,EIF2S3Y,HSP90AB1,CCT3,REM2,RRAGB,RIT2,RHOU,CCT5,RAB27A,MLH3,TUBA1A,GPN3,HSPA8,PRUNE2,CCT2,ABCB10,CHTF18,ATAD3A,RAB37,CCT8,HFM1,ABCB6,ARL6,DDX5,HSPD1,MORC4,GNG4,NUDT11,RAC3,DCPS,NUDT12,HELB,GNG3,RTEL1,KIF6,ARL5C,ADPRM
GO:MF	hydrolase activity, acting on acid anhydrides, in phosphorus-containing anhydrides	GO:0016818	5.18242e-05	4.28547	728	638	44	25412	TUBB2A,ARL10,SMC4,GSPT2,HSP90AA1,EEF1A1,RAB34,EIF2S3Y,HSP90AB1,CCT3,REM2,RRAGB,RIT2,RHOU,CCT5,RAB27A,MLH3,TUBA1A,GPN3,HSPA8,PRUNE2,CCT2,ABCB10,CHTF18,ATAD3A,RAB37,CCT8,HFM1,ABCB6,ARL6,DDX5,HSPD1,MORC4,GNG4,NUDT11,RAC3,DCPS,NUDT12,HELB,GNG3,RTEL1,KIF6,ARL5C,ADPRM
GO:MF	hydrolase activity, acting on acid anhydrides	GO:0016817	5.18242e-05	4.28547	728	638	44	25412	TUBB2A,ARL10,SMC4,GSPT2,HSP90AA1,EEF1A1,RAB34,EIF2S3Y,HSP90AB1,CCT3,REM2,RRAGB,RIT2,RHOU,CCT5,RAB27A,MLH3,TUBA1A,GPN3,HSPA8,PRUNE2,CCT2,ABCB10,CHTF18,ATAD3A,RAB37,CCT8,HFM1,ABCB6,ARL6,DDX5,HSPD1,MORC4,GNG4,NUDT11,RAC3,DCPS,NUDT12,HELB,GNG3,RTEL1,KIF6,ARL5C,ADPRM
GO:MF	cis-regulatory region sequence-specific DNA binding	GO:0000987	0.000125771	3.90042	1128	638	58	25412	ONECUT2,TWIST1,PAX2,EBF4,EN2,NDN,ZSCAN18,SKOR1,ZFP28,NFYA,STAT6,IRX5,CREB3L3,DLX4,DLX2,DMRT2,MYEF2,HDAC1,ZFP229,ZFP3,CCAR1,ZFP273,MED12,ZFP92,EN1,ZFP712,IRX2,FOXB1,IRX3,HOXC4,TBX2,VAX2,PAX3,SIRT1,ZFP866,TFAP4,ZFP647,ZFP692,ZFP53,NHLH2,MEIS1,HNF1B,MYBL1,PAX7,TRP53,ZFP184,ZFP516,MYCL,ZFP677,AW146154,H3F3B,LHX1,POU4F2,ZFP446,ZFP449,HOXB2,TRP73,ZFP54
GO:MF	purine nucleotide binding	GO:0017076	0.000176965	3.75211	1934	638	85	25412	RIMKLB,PNCK,TUBB2A,ACOT7,DGKA,ARL10,SMC4,GSPT2,HSP90AA1,EEF1A1,RAB34,SMARCA1,EIF2S3Y,HSP90AB1,CCT3,MMAB,REM2,PRPS1L3,RRAGB,RIT2,SAMHD1,RHOU,STK3,ACADVL,TAOK3,NAGK,UCKL1,CCT5,NRBP1,RAB27A,MAPK3,STK33,MLH3,TUBA1A,FPGS,HCN3,ABCA8A,GPN3,MAST1,HSPA8,CCT2,ABCB10,CHTF18,ILK,LATS2,ATAD3A,RAB37,CCT8,HFM1,AHCY,ABCB6,CLCN5,MCCC2,ABCD4,HARS,HARS2,RPS6KA6,ARL6,PIM2,DDX5,HSPD1,MAT2A,DNAH5,DNAH7B,TEC,CTPS2,PRPS…
GO:MF	carbohydrate derivative binding	GO:0097367	0.000188349	3.72504	2278	638	96	25412	RIMKLB,PNCK,GAP43,TUBB2A,ACOT7,DGKA,ARL10,SMC4,COL5A3,GSPT2,HSP90AA1,EEF1A1,RAB34,SMARCA1,EIF2S3Y,HSP90AB1,CCT3,DPYSL3,MMAB,REM2,PRPS1L3,NINJ1,RRAGB,RIT2,SAMHD1,RHOU,STK3,ACADVL,DUS2,TAOK3,NAGK,UCKL1,CCT5,NRBP1,RAB27A,PRIM1,MAPK3,STK33,MLH3,TUBA1A,FPGS,HCN3,ABCA8A,GPN3,MAST1,HSPA8,SGSH,CCT2,ABCB10,CHTF18,ILK,LATS2,ATAD3A,RAB37,CCT8,HFM1,ABCB6,CLCN5,MCCC2,EFEMP2,ABCD4,HARS,HARS2,RPS6KA6,ARL6,PIM2,…
GO:MF	ribonucleotide binding	GO:0032553	0.00019297	3.71451	1938	638	85	25412	RIMKLB,PNCK,TUBB2A,ACOT7,DGKA,ARL10,SMC4,GSPT2,HSP90AA1,EEF1A1,RAB34,SMARCA1,EIF2S3Y,HSP90AB1,CCT3,MMAB,REM2,PRPS1L3,RRAGB,RIT2,SAMHD1,RHOU,STK3,ACADVL,DUS2,TAOK3,NAGK,UCKL1,CCT5,NRBP1,RAB27A,PRIM1,MAPK3,STK33,MLH3,TUBA1A,FPGS,HCN3,ABCA8A,GPN3,MAST1,HSPA8,CCT2,ABCB10,CHTF18,ILK,LATS2,ATAD3A,RAB37,CCT8,HFM1,ABCB6,CLCN5,MCCC2,ABCD4,HARS,HARS2,RPS6KA6,ARL6,PIM2,DDX5,HSPD1,MAT2A,DNAH5,DNAH7B,TEC,CTPS…
GO:MF	RNA polymerase II cis-regulatory region sequence-specific DNA binding	GO:0000978	0.000326165	3.48656	1105	638	56	25412	ONECUT2,TWIST1,EBF4,EN2,NDN,ZSCAN18,SKOR1,ZFP28,NFYA,STAT6,IRX5,CREB3L3,DLX4,DLX2,DMRT2,MYEF2,HDAC1,ZFP229,ZFP3,CCAR1,ZFP273,MED12,ZFP92,EN1,ZFP712,IRX2,FOXB1,IRX3,HOXC4,TBX2,VAX2,PAX3,SIRT1,ZFP866,TFAP4,ZFP647,ZFP692,ZFP53,NHLH2,MEIS1,HNF1B,MYBL1,PAX7,TRP53,ZFP184,ZFP516,MYCL,ZFP677,AW146154,H3F3B,POU4F2,ZFP446,ZFP449,HOXB2,TRP73,ZFP54
GO:MF	chromatin binding	GO:0003682	0.000439164	3.35737	606	638	37	25412	NDN,TSPYL2,SMC4,SMARCA1,CDC45,RIT2,TSPYL3,DLX2,MLH3,RNF2,PHF1,POLR3GL,HDAC1,HDAC2,PAF1,MED12,NAP1L5,STAG1,NAP1L3,CTBP2,VAX2,PAX3,SIRT1,PARP2,ZFP692,RING1,MEIS1,ASXL3,TRP53,RAD21L,RAD51,CRTC2,HMGN1,H3F3B,POU4F2,CITED2,APEX1
GO:MF	purine ribonucleotide binding	GO:0032555	0.000475844	3.32254	1919	638	83	25412	RIMKLB,PNCK,TUBB2A,ACOT7,DGKA,ARL10,SMC4,GSPT2,HSP90AA1,EEF1A1,RAB34,SMARCA1,EIF2S3Y,HSP90AB1,CCT3,MMAB,REM2,PRPS1L3,RRAGB,RIT2,SAMHD1,RHOU,STK3,ACADVL,TAOK3,NAGK,UCKL1,CCT5,NRBP1,RAB27A,MAPK3,STK33,MLH3,TUBA1A,FPGS,HCN3,ABCA8A,GPN3,MAST1,HSPA8,CCT2,ABCB10,CHTF18,ILK,LATS2,ATAD3A,RAB37,CCT8,HFM1,ABCB6,CLCN5,MCCC2,ABCD4,HARS,HARS2,RPS6KA6,ARL6,PIM2,DDX5,HSPD1,MAT2A,DNAH5,DNAH7B,TEC,CTPS2,PRPS1,ARA…
GO:MF	transcription factor binding	GO:0008134	0.00055533	3.25545	612	638	37	25412	TWIST1,USP11,OPTN,SMARCA1,FAF1,PRMT2,NFYA,BBS2,RNF25,PHF1,HDAC1,HDAC2,SETD6,MED12,CTBP2,TBX2,PAX3,SIRT1,DDX5,NHLH2,DMAP1,BBS7,HNF1B,TRP53,ZNHIT6,PRKDC,ZFP516,NIF3L1,STK36,CRTC2,FBL,BEX2,DACT1,MED30,CITED2,APEX1,TRP73
GO:MF	purine ribonucleoside triphosphate binding	GO:0035639	0.000616412	3.21013	1839	638	80	25412	RIMKLB,PNCK,TUBB2A,DGKA,ARL10,SMC4,GSPT2,HSP90AA1,EEF1A1,RAB34,SMARCA1,EIF2S3Y,HSP90AB1,CCT3,MMAB,REM2,PRPS1L3,RRAGB,RIT2,SAMHD1,RHOU,STK3,TAOK3,NAGK,UCKL1,CCT5,NRBP1,RAB27A,MAPK3,STK33,MLH3,TUBA1A,FPGS,ABCA8A,GPN3,MAST1,HSPA8,CCT2,ABCB10,CHTF18,ILK,LATS2,ATAD3A,RAB37,CCT8,HFM1,ABCB6,CLCN5,MCCC2,ABCD4,HARS,HARS2,RPS6KA6,ARL6,PIM2,DDX5,HSPD1,MAT2A,DNAH5,DNAH7B,TEC,CTPS2,PRPS1,ARAF,CLK4,MET,PRKDC,R…
GO:MF	nucleic acid binding	GO:0003676	0.000617234	3.20955	4721	638	167	25412	ONECUT2,TWIST1,PAX2,EBF4,EN2,NDN,PNMA3,ASH2L,ZSCAN18,SMC4,TFAP2A,SCAPER,SKOR1,GSPT2,SRSF5,HSP90AA1,EEF1A1,SMARCA1,EIF2S3Y,SOX3,HSP90AB1,ZFP28,ZMAT1,NFYA,STAT6,IRX5,SRSF2,ZFP157,CDC45,SAMHD1,ORC3,DUS2,CCT5,CENPC1,CREB3L3,DLX4,SUV39H1,DLX2,TERF2IP,PABPN1,DMRT2,TIA1,MLH3,STAT4,TELO2,PHF1,MYEF2,ZFP955A,HDAC1,NELFB,ZFP229,SIM1,HOXD8,HDAC2,AIFM2,HSPA8,LIN28B,2610008E11RIK,KHNYN,HEXIM2,LBX1,ZFP90,PRKRA,…
GO:MF	nucleoside-triphosphatase activity	GO:0017111	0.00077321	3.1117	672	638	39	25412	TUBB2A,ARL10,SMC4,GSPT2,HSP90AA1,EEF1A1,RAB34,EIF2S3Y,HSP90AB1,CCT3,REM2,RRAGB,RIT2,RHOU,CCT5,RAB27A,MLH3,TUBA1A,GPN3,HSPA8,CCT2,ABCB10,CHTF18,ATAD3A,RAB37,CCT8,HFM1,ABCB6,ARL6,DDX5,HSPD1,MORC4,GNG4,RAC3,HELB,GNG3,RTEL1,KIF6,ARL5C
GO:MF	flavin adenine dinucleotide binding	GO:0050660	0.0024332	2.61382	94	638	12	25412	CYB5R1,ACADVL,DUS2,MAOA,AIFM2,TXNRD3,COQ6,DUS3L,ILVBL,PIPOX,DMGDH,DPYD
GO:MF	ribose phosphate diphosphokinase activity	GO:0004749	0.00333636	2.47673	6	638	4	25412	PRPS1L3,PRPSAP1,PRPSAP2,PRPS1
GO:MF	diphosphotransferase activity	GO:0016778	0.0076297	2.11749	7	638	4	25412	PRPS1L3,PRPSAP1,PRPSAP2,PRPS1
GO:MF	adenyl nucleotide binding	GO:0030554	0.00927356	2.03275	1570	638	67	25412	RIMKLB,PNCK,ACOT7,DGKA,SMC4,HSP90AA1,SMARCA1,HSP90AB1,CCT3,MMAB,PRPS1L3,STK3,ACADVL,TAOK3,NAGK,UCKL1,CCT5,NRBP1,MAPK3,STK33,MLH3,FPGS,HCN3,ABCA8A,MAST1,HSPA8,CCT2,ABCB10,CHTF18,ILK,LATS2,ATAD3A,CCT8,HFM1,AHCY,ABCB6,CLCN5,MCCC2,ABCD4,HARS,HARS2,RPS6KA6,PIM2,DDX5,HSPD1,MAT2A,DNAH5,DNAH7B,TEC,CTPS2,PRPS1,ARAF,CLK4,BAG2,MET,PRKDC,RAD51,MYO1H,STK36,DGUOK,RPS6KB2,HELB,CDKL3,RTEL1,KIF6,PASK,PKDCC
GO:MF	RNA polymerase II-specific DNA-binding transcription factor binding	GO:0061629	0.0160752	1.79384	372	638	24	25412	SMARCA1,FAF1,PRMT2,BBS2,RNF25,HDAC1,HDAC2,SETD6,MED12,CTBP2,SIRT1,DDX5,NHLH2,DMAP1,BBS7,TRP53,PRKDC,NIF3L1,BEX2,DACT1,MED30,CITED2,APEX1,TRP73
GO:MF	adenyl ribonucleotide binding	GO:0032559	0.0238637	1.62226	1556	638	65	25412	RIMKLB,PNCK,ACOT7,DGKA,SMC4,HSP90AA1,SMARCA1,HSP90AB1,CCT3,MMAB,PRPS1L3,STK3,ACADVL,TAOK3,NAGK,UCKL1,CCT5,NRBP1,MAPK3,STK33,MLH3,FPGS,HCN3,ABCA8A,MAST1,HSPA8,CCT2,ABCB10,CHTF18,ILK,LATS2,ATAD3A,CCT8,HFM1,ABCB6,CLCN5,MCCC2,ABCD4,HARS,HARS2,RPS6KA6,PIM2,DDX5,HSPD1,MAT2A,DNAH5,DNAH7B,TEC,CTPS2,PRPS1,ARAF,CLK4,MET,PRKDC,RAD51,MYO1H,STK36,DGUOK,RPS6KB2,HELB,CDKL3,RTEL1,KIF6,PASK,PKDCC
GO:MF	protein folding chaperone	GO:0044183	0.0273684	1.56275	39	638	7	25412	HSP90AA1,HSP90AB1,CCT3,CCT5,HSPA8,CCT2,CCT8
GO:MF	ATP-dependent activity	GO:0140657	0.0340951	1.46731	545	638	30	25412	DYNC1I1,SMC4,HSP90AA1,SMARCA1,HSP90AB1,CCT3,CCT5,MLH3,ABCA8A,HSPA8,CCT2,ABCB10,CHTF18,ATAD3A,CCT8,HFM1,ABCB6,ABCD4,DDX5,HSPD1,DNAH5,MYL6,MORC4,DNAH7B,TRP53,RAD51,MYO1H,HELB,RTEL1,KIF6
GO:MF	ATP binding	GO:0005524	0.0375009	1.42596	1486	638	62	25412	RIMKLB,PNCK,DGKA,SMC4,HSP90AA1,SMARCA1,HSP90AB1,CCT3,MMAB,PRPS1L3,STK3,TAOK3,NAGK,UCKL1,CCT5,NRBP1,MAPK3,STK33,MLH3,FPGS,ABCA8A,MAST1,HSPA8,CCT2,ABCB10,CHTF18,ILK,LATS2,ATAD3A,CCT8,HFM1,ABCB6,CLCN5,MCCC2,ABCD4,HARS,HARS2,RPS6KA6,PIM2,DDX5,HSPD1,MAT2A,DNAH5,DNAH7B,TEC,CTPS2,PRPS1,ARAF,CLK4,MET,PRKDC,RAD51,MYO1H,STK36,DGUOK,RPS6KB2,HELB,CDKL3,RTEL1,KIF6,PASK,PKDCC
GO:MF	DNA-binding transcription factor binding	GO:0140297	0.0416102	1.3808	498	638	28	25412	TWIST1,SMARCA1,FAF1,PRMT2,BBS2,RNF25,HDAC1,HDAC2,SETD6,MED12,CTBP2,TBX2,SIRT1,DDX5,NHLH2,DMAP1,BBS7,TRP53,PRKDC,ZFP516,NIF3L1,CRTC2,BEX2,DACT1,MED30,CITED2,APEX1,TRP73
GO:BP	heterocycle biosynthetic process	GO:0018130	8.87214e-19	18.052	4039	639	188	27543	ONECUT2,SFMBT2,TWIST1,PAX2,EBF4,EN2,NDN,ZFP503,ASH2L,ACOT7,NRIP2,ZSCAN18,MORF4L2,TFAP2A,MAGED1,SKOR1,HSP90AA1,SMARCA1,FAF1,PRMT2,SOX3,HSP90AB1,CCT3,CD200,ZFP28,PRPS1L3,NFYA,NT5E,STAT6,IRX5,ZFP157,RIT2,STK3,RNF25,UCKL1,CCT5,MID2,CREB3L3,DLX4,RRM2B,SUV39H1,PGRMC1,MAGED2,DLX2,PRIM1,TERF2IP,DMRT2,MAPK3,STAT4,RNF2,TELO2,PHF1,PRPSAP1,MYEF2,ZFP955A,POLR3GL,FPGS,HDAC1,TRO,NELFB,ZFP229,SIM1,HOXD8,HDAC2,PR…
GO:BP	organic substance biosynthetic process	GO:1901576	1.04449e-18	17.9811	5770	639	239	27543	ONECUT2,SFMBT2,TWIST1,PAX2,ASL,EBF4,EN2,NDN,ZFP503,ASH2L,ACOT7,NRIP2,ZSCAN18,MORF4L2,DGKA,TFAP2A,MAGED1,SKOR1,GSPT2,HSP90AA1,EEF1A1,SMARCA1,FAF1,EIF2S3Y,PRMT2,SOX3,HSP90AB1,CCT3,GRB10,CD200,ZFP28,PRPS1L3,NFYA,NT5E,STAT6,IRX5,ZFP157,RIT2,HSD17B11,GPI1,STK3,CYB5R1,ACADVL,HS6ST2,RNF25,UCKL1,CCT5,MID2,CREB3L3,DLX4,RRM2B,SUV39H1,PGRMC1,MAGED2,DLX2,LTA4H,PRIM1,TERF2IP,MRI1,DMRT2,MAPK3,TIA1,STAT4,RNF2,T…
GO:BP	biosynthetic process	GO:0009058	1.04734e-18	17.9799	5876	639	242	27543	ONECUT2,SFMBT2,TWIST1,PAX2,ASL,EBF4,EN2,NDN,ZFP503,ASH2L,ACOT7,NRIP2,ZSCAN18,MORF4L2,DGKA,TFAP2A,MAGED1,SKOR1,GSPT2,HSP90AA1,EEF1A1,SMARCA1,FAF1,EIF2S3Y,PRMT2,SOX3,HSP90AB1,CCT3,GRB10,CD200,ZFP28,PRPS1L3,NFYA,NT5E,STAT6,IRX5,ZFP157,RIT2,HSD17B11,GPI1,STK3,CYB5R1,ACADVL,HS6ST2,RNF25,UCKL1,CCT5,MID2,CREB3L3,DLX4,RRM2B,SUV39H1,PGRMC1,MAGED2,RAB27A,DLX2,LTA4H,PRIM1,TERF2IP,MRI1,DMRT2,MAPK3,TIA1,STAT4…
GO:BP	aromatic compound biosynthetic process	GO:0019438	1.2127e-18	17.9162	4050	639	188	27543	ONECUT2,SFMBT2,TWIST1,PAX2,EBF4,EN2,NDN,ZFP503,ASH2L,ACOT7,NRIP2,ZSCAN18,MORF4L2,TFAP2A,MAGED1,SKOR1,HSP90AA1,SMARCA1,FAF1,PRMT2,SOX3,HSP90AB1,CCT3,CD200,ZFP28,PRPS1L3,NFYA,NT5E,STAT6,IRX5,ZFP157,RIT2,STK3,RNF25,UCKL1,CCT5,MID2,CREB3L3,DLX4,RRM2B,SUV39H1,PGRMC1,MAGED2,DLX2,PRIM1,TERF2IP,DMRT2,MAPK3,STAT4,RNF2,TELO2,PHF1,PRPSAP1,MYEF2,ZFP955A,POLR3GL,FPGS,HDAC1,TRO,NELFB,ZFP229,SIM1,HOXD8,HDAC2,PR…
GO:BP	organic cyclic compound biosynthetic process	GO:1901362	2.29546e-18	17.6391	4203	639	192	27543	ONECUT2,SFMBT2,TWIST1,PAX2,EBF4,EN2,NDN,ZFP503,ASH2L,ACOT7,NRIP2,ZSCAN18,MORF4L2,TFAP2A,MAGED1,SKOR1,HSP90AA1,SMARCA1,FAF1,PRMT2,SOX3,HSP90AB1,CCT3,CD200,ZFP28,PRPS1L3,NFYA,NT5E,STAT6,IRX5,ZFP157,RIT2,HSD17B11,STK3,CYB5R1,RNF25,UCKL1,CCT5,MID2,CREB3L3,DLX4,RRM2B,SUV39H1,PGRMC1,MAGED2,DLX2,PRIM1,TERF2IP,DMRT2,MAPK3,STAT4,RNF2,TELO2,PHF1,PRPSAP1,MYEF2,ZFP955A,POLR3GL,FPGS,HDAC1,TRO,NELFB,ZFP229,SIM…
GO:BP	regulation of cellular metabolic process	GO:0031323	3.30511e-18	17.4808	6103	639	247	27543	ONECUT2,SFMBT2,TWIST1,PAX2,EBF4,EN2,OPTN,NDN,ZFP503,TSPYL2,ASH2L,NRIP2,ZSCAN18,MORF4L2,TFAP2A,MAGED1,PSME1,SKOR1,WDR6,SRSF5,HSP90AA1,EEF1A1,SMARCA1,FAF1,EIF2S3Y,PRMT2,SOX3,HSP90AB1,CCT3,GRB10,CD200,RDX,ZFP28,ACHE,NFYA,WDR41,STAT6,IRX5,SRSF2,RRAGB,ZFP157,RIT2,GPI1,STK3,ORC3,ACADVL,TAOK3,RNF25,BEX4,CCT5,MID2,CORO1C,CREB3L3,DLX4,SUV39H1,TPX2,MAGED2,RAB27A,DLX2,TERF2IP,DMRT2,MAPK3,TIA1,INPP5F,STAT4,R…
GO:BP	cellular biosynthetic process	GO:0044249	1.31772e-17	16.8802	5701	639	234	27543	ONECUT2,SFMBT2,TWIST1,PAX2,ASL,EBF4,EN2,NDN,ZFP503,ASH2L,ACOT7,NRIP2,ZSCAN18,MORF4L2,DGKA,TFAP2A,MAGED1,SKOR1,GSPT2,HSP90AA1,EEF1A1,SMARCA1,FAF1,EIF2S3Y,PRMT2,SOX3,HSP90AB1,CCT3,GRB10,CD200,ZFP28,PRPS1L3,NFYA,NT5E,STAT6,IRX5,ZFP157,RIT2,STK3,ACADVL,HS6ST2,RNF25,UCKL1,CCT5,MID2,CREB3L3,DLX4,RRM2B,SUV39H1,PGRMC1,MAGED2,DLX2,LTA4H,PRIM1,TERF2IP,MRI1,DMRT2,MAPK3,TIA1,STAT4,RNF2,TELO2,PHF1,PRPSAP1,MYE…
GO:BP	nucleobase-containing compound biosynthetic process	GO:0034654	3.06473e-17	16.5136	3971	639	182	27543	ONECUT2,SFMBT2,TWIST1,PAX2,EBF4,EN2,NDN,ZFP503,ASH2L,ACOT7,NRIP2,ZSCAN18,MORF4L2,TFAP2A,MAGED1,SKOR1,HSP90AA1,SMARCA1,FAF1,PRMT2,SOX3,HSP90AB1,CCT3,CD200,ZFP28,PRPS1L3,NFYA,NT5E,STAT6,IRX5,ZFP157,RIT2,STK3,RNF25,UCKL1,CCT5,MID2,CREB3L3,DLX4,RRM2B,SUV39H1,MAGED2,DLX2,PRIM1,TERF2IP,DMRT2,MAPK3,STAT4,RNF2,TELO2,PHF1,PRPSAP1,MYEF2,ZFP955A,POLR3GL,HDAC1,TRO,NELFB,ZFP229,SIM1,HOXD8,HDAC2,PRDX3,HSPA8,26…
GO:BP	cellular nitrogen compound biosynthetic process	GO:0044271	8.3887e-17	16.0763	4774	639	205	27543	ONECUT2,SFMBT2,TWIST1,PAX2,ASL,EBF4,EN2,NDN,ZFP503,ASH2L,ACOT7,NRIP2,ZSCAN18,MORF4L2,TFAP2A,MAGED1,SKOR1,GSPT2,HSP90AA1,EEF1A1,SMARCA1,FAF1,EIF2S3Y,PRMT2,SOX3,HSP90AB1,CCT3,CD200,ZFP28,PRPS1L3,NFYA,NT5E,STAT6,IRX5,ZFP157,RIT2,STK3,RNF25,UCKL1,CCT5,MID2,CREB3L3,DLX4,RRM2B,SUV39H1,PGRMC1,MAGED2,DLX2,PRIM1,TERF2IP,DMRT2,MAPK3,TIA1,STAT4,RNF2,TELO2,PHF1,PRPSAP1,MYEF2,ZFP955A,POLR3GL,FPGS,HDAC1,TRO,AB…
GO:BP	regulation of primary metabolic process	GO:0080090	1.08704e-16	15.9638	5971	639	239	27543	ONECUT2,SFMBT2,TWIST1,PAX2,EBF4,EN2,NDN,ZFP503,TSPYL2,ASH2L,NRIP2,ZSCAN18,MORF4L2,TFAP2A,MAGED1,PSME1,SKOR1,SRSF5,HSP90AA1,SMARCA1,FAF1,EIF2S3Y,PRMT2,SOX3,HSP90AB1,CCT3,GRB10,CD200,RDX,ZFP28,NFYA,STAT6,IRX5,SRSF2,ZFP157,RIT2,GPI1,STK3,ORC3,ACADVL,TAOK3,RNF25,BEX4,CCT5,MID2,CORO1C,CREB3L3,DLX4,VBP1,SUV39H1,TPX2,MAGED2,DLX2,TERF2IP,DMRT2,MAPK3,TIA1,INPP5F,STAT4,RNF2,TELO2,PHF1,MYEF2,ZFP955A,HDAC1,T…
GO:BP	regulation of nucleobase-containing compound metabolic process	GO:0019219	1.24427e-16	15.9051	4088	639	184	27543	ONECUT2,SFMBT2,TWIST1,PAX2,EBF4,EN2,NDN,ZFP503,TSPYL2,ASH2L,NRIP2,ZSCAN18,MORF4L2,TFAP2A,MAGED1,SKOR1,SRSF5,HSP90AA1,SMARCA1,FAF1,PRMT2,SOX3,HSP90AB1,CCT3,CD200,ZFP28,NFYA,STAT6,IRX5,SRSF2,ZFP157,RIT2,STK3,ORC3,RNF25,CCT5,MID2,CREB3L3,DLX4,SUV39H1,MAGED2,DLX2,TERF2IP,DMRT2,MAPK3,TIA1,STAT4,RNF2,PHF1,MYEF2,ZFP955A,HDAC1,TRO,NELFB,ZFP229,SIM1,HOXD8,HDAC2,PRDX3,HSPA8,LIN28B,2610008E11RIK,CCT2,HEXIM2…
GO:BP	regulation of nitrogen compound metabolic process	GO:0051171	6.05864e-15	14.2176	5797	639	229	27543	ONECUT2,SFMBT2,TWIST1,PAX2,EBF4,EN2,NDN,ZFP503,TSPYL2,ASH2L,NRIP2,ZSCAN18,MORF4L2,TFAP2A,MAGED1,PSME1,SKOR1,SRSF5,HSP90AA1,SMARCA1,FAF1,EIF2S3Y,PRMT2,SOX3,HSP90AB1,CCT3,CD200,RDX,ZFP28,NFYA,STAT6,IRX5,SRSF2,ZFP157,RIT2,GPI1,STK3,ORC3,TAOK3,RNF25,BEX4,CCT5,MID2,CORO1C,CREB3L3,DLX4,VBP1,SUV39H1,TPX2,MAGED2,DLX2,TERF2IP,DMRT2,MAPK3,TIA1,INPP5F,STAT4,RNF2,TELO2,PHF1,MYEF2,ZFP955A,HDAC1,TRO,NELFB,ZFP2…
GO:BP	regulation of biosynthetic process	GO:0009889	8.70574e-15	14.0602	4220	639	183	27543	ONECUT2,SFMBT2,TWIST1,PAX2,EBF4,EN2,NDN,ZFP503,ASH2L,NRIP2,ZSCAN18,MORF4L2,TFAP2A,MAGED1,SKOR1,HSP90AA1,EEF1A1,SMARCA1,FAF1,EIF2S3Y,PRMT2,SOX3,HSP90AB1,CCT3,GRB10,CD200,ZFP28,NFYA,STAT6,IRX5,ZFP157,RIT2,STK3,ACADVL,RNF25,CCT5,MID2,CREB3L3,DLX4,SUV39H1,MAGED2,RAB27A,DLX2,TERF2IP,DMRT2,MAPK3,TIA1,STAT4,RNF2,PHF1,MYEF2,ZFP955A,HDAC1,TRO,NELFB,ZFP229,SIM1,HOXD8,HDAC2,NNMT,PRDX3,HSPA8,2610008E11RIK,CC…
GO:BP	regulation of RNA metabolic process	GO:0051252	1.67134e-14	13.7769	3783	639	169	27543	ONECUT2,SFMBT2,TWIST1,PAX2,EBF4,EN2,NDN,ZFP503,ASH2L,NRIP2,ZSCAN18,MORF4L2,TFAP2A,MAGED1,SKOR1,SRSF5,SMARCA1,FAF1,PRMT2,SOX3,CD200,ZFP28,NFYA,STAT6,IRX5,SRSF2,ZFP157,RIT2,STK3,RNF25,MID2,CREB3L3,DLX4,SUV39H1,MAGED2,DLX2,TERF2IP,DMRT2,MAPK3,TIA1,STAT4,RNF2,PHF1,MYEF2,ZFP955A,HDAC1,TRO,NELFB,ZFP229,SIM1,HOXD8,HDAC2,PRDX3,HSPA8,LIN28B,2610008E11RIK,HEXIM2,LBX1,PAF1,ZFP90,SETD6,ZFP383,ZFP3,ASCC1,ELP4…
GO:BP	regulation of macromolecule biosynthetic process	GO:0010556	1.93692e-14	13.7129	3953	639	174	27543	ONECUT2,SFMBT2,TWIST1,PAX2,EBF4,EN2,NDN,ZFP503,ASH2L,NRIP2,ZSCAN18,MORF4L2,TFAP2A,MAGED1,SKOR1,HSP90AA1,SMARCA1,FAF1,EIF2S3Y,PRMT2,SOX3,HSP90AB1,CCT3,GRB10,CD200,ZFP28,NFYA,STAT6,IRX5,ZFP157,RIT2,STK3,RNF25,CCT5,MID2,CREB3L3,DLX4,SUV39H1,MAGED2,DLX2,TERF2IP,DMRT2,MAPK3,TIA1,STAT4,RNF2,PHF1,MYEF2,ZFP955A,HDAC1,TRO,NELFB,ZFP229,SIM1,HOXD8,HDAC2,PRDX3,HSPA8,2610008E11RIK,CCT2,HEXIM2,C1QTNF2,LBX1,PAF…
GO:BP	regulation of cellular biosynthetic process	GO:0031326	2.96337e-14	13.5282	4136	639	179	27543	ONECUT2,SFMBT2,TWIST1,PAX2,EBF4,EN2,NDN,ZFP503,ASH2L,NRIP2,ZSCAN18,MORF4L2,TFAP2A,MAGED1,SKOR1,HSP90AA1,SMARCA1,FAF1,EIF2S3Y,PRMT2,SOX3,HSP90AB1,CCT3,GRB10,CD200,ZFP28,NFYA,STAT6,IRX5,ZFP157,RIT2,STK3,ACADVL,RNF25,CCT5,MID2,CREB3L3,DLX4,SUV39H1,MAGED2,DLX2,TERF2IP,DMRT2,MAPK3,TIA1,STAT4,RNF2,PHF1,MYEF2,ZFP955A,HDAC1,TRO,NELFB,ZFP229,SIM1,HOXD8,HDAC2,NNMT,PRDX3,HSPA8,2610008E11RIK,CCT2,HEXIM2,C1QT…
GO:BP	RNA biosynthetic process	GO:0032774	9.41824e-13	12.026	3614	639	159	27543	ONECUT2,SFMBT2,TWIST1,PAX2,EBF4,EN2,NDN,ZFP503,ASH2L,NRIP2,ZSCAN18,MORF4L2,TFAP2A,MAGED1,SKOR1,SMARCA1,FAF1,PRMT2,SOX3,CD200,ZFP28,NFYA,STAT6,IRX5,ZFP157,RIT2,STK3,RNF25,MID2,CREB3L3,DLX4,SUV39H1,MAGED2,DLX2,PRIM1,TERF2IP,DMRT2,MAPK3,STAT4,RNF2,PHF1,MYEF2,ZFP955A,POLR3GL,HDAC1,TRO,NELFB,ZFP229,SIM1,HOXD8,HDAC2,PRDX3,HSPA8,2610008E11RIK,HEXIM2,LBX1,PAF1,ZFP90,SETD6,ZFP383,ZFP3,ASCC1,ELP4,GTF3C6,IL…
GO:BP	regulation of transcription, DNA-templated	GO:0006355	1.69401e-12	11.7711	3474	639	154	27543	ONECUT2,SFMBT2,TWIST1,PAX2,EBF4,EN2,NDN,ZFP503,ASH2L,NRIP2,ZSCAN18,MORF4L2,TFAP2A,MAGED1,SKOR1,SMARCA1,FAF1,PRMT2,SOX3,CD200,ZFP28,NFYA,STAT6,IRX5,ZFP157,RIT2,STK3,RNF25,MID2,CREB3L3,DLX4,SUV39H1,MAGED2,DLX2,TERF2IP,DMRT2,MAPK3,STAT4,RNF2,PHF1,MYEF2,ZFP955A,HDAC1,TRO,NELFB,ZFP229,SIM1,HOXD8,HDAC2,PRDX3,HSPA8,2610008E11RIK,HEXIM2,LBX1,PAF1,ZFP90,SETD6,ZFP383,ZFP3,ASCC1,ELP4,ILK,TFR2,ZFP711,CCAR1,Z…
GO:BP	regulation of nucleic acid-templated transcription	GO:1903506	1.7373e-12	11.7601	3475	639	154	27543	ONECUT2,SFMBT2,TWIST1,PAX2,EBF4,EN2,NDN,ZFP503,ASH2L,NRIP2,ZSCAN18,MORF4L2,TFAP2A,MAGED1,SKOR1,SMARCA1,FAF1,PRMT2,SOX3,CD200,ZFP28,NFYA,STAT6,IRX5,ZFP157,RIT2,STK3,RNF25,MID2,CREB3L3,DLX4,SUV39H1,MAGED2,DLX2,TERF2IP,DMRT2,MAPK3,STAT4,RNF2,PHF1,MYEF2,ZFP955A,HDAC1,TRO,NELFB,ZFP229,SIM1,HOXD8,HDAC2,PRDX3,HSPA8,2610008E11RIK,HEXIM2,LBX1,PAF1,ZFP90,SETD6,ZFP383,ZFP3,ASCC1,ELP4,ILK,TFR2,ZFP711,CCAR1,Z…
GO:BP	regulation of RNA biosynthetic process	GO:2001141	2.12489e-12	11.6727	3483	639	154	27543	ONECUT2,SFMBT2,TWIST1,PAX2,EBF4,EN2,NDN,ZFP503,ASH2L,NRIP2,ZSCAN18,MORF4L2,TFAP2A,MAGED1,SKOR1,SMARCA1,FAF1,PRMT2,SOX3,CD200,ZFP28,NFYA,STAT6,IRX5,ZFP157,RIT2,STK3,RNF25,MID2,CREB3L3,DLX4,SUV39H1,MAGED2,DLX2,TERF2IP,DMRT2,MAPK3,STAT4,RNF2,PHF1,MYEF2,ZFP955A,HDAC1,TRO,NELFB,ZFP229,SIM1,HOXD8,HDAC2,PRDX3,HSPA8,2610008E11RIK,HEXIM2,LBX1,PAF1,ZFP90,SETD6,ZFP383,ZFP3,ASCC1,ELP4,ILK,TFR2,ZFP711,CCAR1,Z…
GO:BP	cellular metabolic process	GO:0044237	2.1909e-12	11.6594	13166	639	405	27543	ONECUT2,SFMBT2,TWIST1,ECE2,GPRASP1,PAX2,LGALS8,RIMKLB,USP11,ASL,EBF4,PNCK,EN2,OPTN,NDN,ZFP503,TSPYL2,ASH2L,ACOT7,NRIP2,ZSCAN18,MORF4L2,DGKA,SMC4,TFAP2A,MAGED1,PSME1,SKOR1,ANAPC5,GSPT2,WDR6,ARXES2,SRSF5,HSP90AA1,EEF1A1,FKBP14,SMARCA1,FAF1,EIF2S3Y,TRMT2B,PRMT2,SOX3,HSP90AB1,CCT3,GRB10,CD200,RDX,ZFP28,APEH,SNCAIP,ELAC1,SAT2,MMAB,MACROD1,ACHE,PRPS1L3,NFYA,WDR41,NT5E,STAT6,IRX5,SRSF2,RRAGB,ZFP157,CDC4…
GO:BP	regulation of metabolic process	GO:0019222	4.55086e-12	11.3419	7320	639	261	27543	ONECUT2,SFMBT2,TWIST1,PAX2,EBF4,EN2,OPTN,NDN,ZFP503,TSPYL2,ASH2L,NRIP2,ZSCAN18,MORF4L2,TFAP2A,MAGED1,PSME1,SKOR1,GSPT2,WDR6,SRSF5,HSP90AA1,EEF1A1,SMARCA1,FAF1,EIF2S3Y,PRMT2,SOX3,HSP90AB1,CCT3,GRB10,CD200,RDX,ZFP28,ACHE,NFYA,WDR41,STAT6,IRX5,SRSF2,BBS2,RRAGB,ZFP157,RIT2,GPI1,STK3,ORC3,ACADVL,TAOK3,RNF25,BEX4,CCT5,MID2,CORO1C,CREB3L3,DLX4,VBP1,SUV39H1,TPX2,MAGED2,RAB27A,DLX2,TERF2IP,DMRT2,MAPK3,TIA…
GO:BP	transcription, DNA-templated	GO:0006351	6.84613e-12	11.1646	3596	639	156	27543	ONECUT2,SFMBT2,TWIST1,PAX2,EBF4,EN2,NDN,ZFP503,ASH2L,NRIP2,ZSCAN18,MORF4L2,TFAP2A,MAGED1,SKOR1,SMARCA1,FAF1,PRMT2,SOX3,CD200,ZFP28,NFYA,STAT6,IRX5,ZFP157,RIT2,STK3,RNF25,MID2,CREB3L3,DLX4,SUV39H1,MAGED2,DLX2,TERF2IP,DMRT2,MAPK3,STAT4,RNF2,PHF1,MYEF2,ZFP955A,POLR3GL,HDAC1,TRO,NELFB,ZFP229,SIM1,HOXD8,HDAC2,PRDX3,HSPA8,2610008E11RIK,HEXIM2,LBX1,PAF1,ZFP90,SETD6,ZFP383,ZFP3,ASCC1,ELP4,GTF3C6,ILK,TFR2…
GO:BP	nucleic acid-templated transcription	GO:0097659	7.01403e-12	11.154	3597	639	156	27543	ONECUT2,SFMBT2,TWIST1,PAX2,EBF4,EN2,NDN,ZFP503,ASH2L,NRIP2,ZSCAN18,MORF4L2,TFAP2A,MAGED1,SKOR1,SMARCA1,FAF1,PRMT2,SOX3,CD200,ZFP28,NFYA,STAT6,IRX5,ZFP157,RIT2,STK3,RNF25,MID2,CREB3L3,DLX4,SUV39H1,MAGED2,DLX2,TERF2IP,DMRT2,MAPK3,STAT4,RNF2,PHF1,MYEF2,ZFP955A,POLR3GL,HDAC1,TRO,NELFB,ZFP229,SIM1,HOXD8,HDAC2,PRDX3,HSPA8,2610008E11RIK,HEXIM2,LBX1,PAF1,ZFP90,SETD6,ZFP383,ZFP3,ASCC1,ELP4,GTF3C6,ILK,TFR2…
GO:BP	primary metabolic process	GO:0044238	7.79928e-12	11.1079	13120	639	402	27543	ONECUT2,SFMBT2,TWIST1,ECE2,PAX2,RIMKLB,USP11,ASL,EBF4,PNCK,EN2,NDN,ZFP503,TSPYL2,ASH2L,ACOT7,NRIP2,ZSCAN18,PAFAH1B3,MORF4L2,DGKA,SMC4,TFAP2A,MAGED1,PSME1,SKOR1,ANAPC5,GSPT2,WDR6,ARXES2,SRSF5,HSP90AA1,EEF1A1,FKBP14,SMARCA1,FAF1,EIF2S3Y,TRMT2B,PRMT2,SOX3,HSP90AB1,CCT3,GRB10,CD200,RDX,ZFP28,APEH,ELAC1,MACROD1,PRPS1L3,NFYA,NT5E,STAT6,IRX5,SRSF2,ZFP157,CDC45,RIT2,HSD17B11,SAMHD1,OTOGL,GPI1,STK3,ORC3,C…
GO:BP	macromolecule biosynthetic process	GO:0009059	1.83474e-11	10.7364	4797	639	190	27543	ONECUT2,SFMBT2,TWIST1,PAX2,EBF4,EN2,NDN,ZFP503,ASH2L,NRIP2,ZSCAN18,MORF4L2,TFAP2A,MAGED1,SKOR1,GSPT2,HSP90AA1,EEF1A1,SMARCA1,FAF1,EIF2S3Y,PRMT2,SOX3,HSP90AB1,CCT3,GRB10,CD200,ZFP28,NFYA,STAT6,IRX5,ZFP157,RIT2,STK3,HS6ST2,RNF25,CCT5,MID2,CREB3L3,DLX4,SUV39H1,MAGED2,DLX2,PRIM1,TERF2IP,DMRT2,MAPK3,TIA1,STAT4,RNF2,TELO2,PHF1,MYEF2,ZFP955A,POLR3GL,HDAC1,TRO,NELFB,ZFP229,SIM1,HOXD8,HDAC2,PRDX3,HSPA8,26…
GO:BP	positive regulation of cellular metabolic process	GO:0031325	2.46875e-11	10.6075	3386	639	148	27543	ONECUT2,TWIST1,PAX2,EBF4,EN2,OPTN,NDN,ASH2L,MORF4L2,TFAP2A,MAGED1,PSME1,SRSF5,HSP90AA1,SMARCA1,FAF1,EIF2S3Y,PRMT2,HSP90AB1,CCT3,GRB10,RDX,NFYA,STAT6,RIT2,TAOK3,CCT5,MID2,CREB3L3,SUV39H1,TPX2,RAB27A,DLX2,TERF2IP,DMRT2,MAPK3,INPP5F,STAT4,TELO2,PHF1,HDAC1,ZFP229,HOXD8,HDAC2,NNMT,HSPA8,LIN28B,CCT2,C1QTNF2,PAF1,ABCB10,ZFP90,FUZ,BCAP31,CHTF18,ILK,TFR2,ZFP711,CCAR1,PSME2,UPF3B,MED12,SNX4,EN1,SRSF1,THAP3…
GO:BP	metabolic process	GO:0008152	2.83359e-11	10.5477	14679	639	435	27543	ONECUT2,SFMBT2,TWIST1,ECE2,GPRASP1,PAX2,LGALS8,RIMKLB,USP11,ASL,EBF4,PNCK,EN2,OPTN,NDN,ZFP503,TSPYL2,ASH2L,ACOT7,NRIP2,ZSCAN18,PAFAH1B3,MORF4L2,DGKA,SMC4,TFAP2A,MAGED1,PSME1,SKOR1,ANAPC5,GSPT2,WDR6,ARXES2,SRSF5,HSP90AA1,EEF1A1,FKBP14,SMARCA1,FAF1,EIF2S3Y,TRMT2B,PRMT2,SOX3,HSP90AB1,CCT3,GRB10,CD200,RDX,ZFP28,APEH,SNCAIP,ELAC1,SAT2,MMAB,MACROD1,ACHE,PRPS1L3,NFYA,WDR41,NT5E,STAT6,IRX5,SRSF2,BBS2,RRA…
GO:BP	organic substance metabolic process	GO:0071704	6.32461e-11	10.199	14240	639	424	27543	ONECUT2,SFMBT2,TWIST1,ECE2,GPRASP1,PAX2,RIMKLB,USP11,ASL,EBF4,PNCK,EN2,OPTN,NDN,ZFP503,TSPYL2,ASH2L,ACOT7,NRIP2,ZSCAN18,PAFAH1B3,MORF4L2,DGKA,SMC4,TFAP2A,MAGED1,PSME1,SKOR1,ANAPC5,GSPT2,WDR6,ARXES2,SRSF5,HSP90AA1,EEF1A1,FKBP14,SMARCA1,FAF1,EIF2S3Y,TRMT2B,PRMT2,SOX3,HSP90AB1,CCT3,GRB10,CD200,RDX,ZFP28,APEH,SNCAIP,ELAC1,SAT2,MMAB,MACROD1,ACHE,PRPS1L3,NFYA,NT5E,STAT6,IRX5,SRSF2,BBS2,ZFP157,CDC45,RIT…
GO:BP	regulation of macromolecule metabolic process	GO:0060255	1.16708e-10	9.9329	6825	639	243	27543	ONECUT2,SFMBT2,TWIST1,PAX2,EBF4,EN2,OPTN,NDN,ZFP503,TSPYL2,ASH2L,NRIP2,ZSCAN18,MORF4L2,TFAP2A,MAGED1,PSME1,SKOR1,GSPT2,SRSF5,HSP90AA1,SMARCA1,FAF1,EIF2S3Y,PRMT2,SOX3,HSP90AB1,CCT3,GRB10,CD200,RDX,ZFP28,ACHE,NFYA,STAT6,IRX5,SRSF2,BBS2,ZFP157,RIT2,GPI1,STK3,ORC3,TAOK3,RNF25,BEX4,CCT5,MID2,CORO1C,CREB3L3,DLX4,VBP1,SUV39H1,TPX2,MAGED2,RAB27A,DLX2,TERF2IP,DMRT2,MAPK3,TIA1,INPP5F,STAT4,RNF2,TELO2,PHF1,…
GO:BP	regulation of transcription by RNA polymerase II	GO:0006357	1.30674e-10	9.88381	2494	639	118	27543	ONECUT2,TWIST1,PAX2,EBF4,EN2,NDN,ASH2L,NRIP2,ZSCAN18,MORF4L2,TFAP2A,MAGED1,SKOR1,SMARCA1,SOX3,ZFP28,NFYA,STAT6,IRX5,ZFP157,RIT2,CREB3L3,DLX4,SUV39H1,MAGED2,DLX2,DMRT2,MAPK3,STAT4,RNF2,MYEF2,ZFP955A,HDAC1,TRO,ZFP229,SIM1,HOXD8,HDAC2,2610008E11RIK,HEXIM2,LBX1,PAF1,ZFP90,ZFP383,ZFP3,ELP4,TFR2,ZFP273,BARX1,MED12,ZFP92,EN1,ZFP712,IRX2,THAP3,ABHD14B,FOXB1,IRX3,HOXC4,CTBP2,TBX2,GTF2H2,VAX2,PAX3,SIRT1,ZF…
GO:BP	cellular process	GO:0009987	2.47007e-10	9.60729	21177	639	564	27543	ONECUT2,SFMBT2,TWIST1,FHL1,ECE2,GPRASP1,PAX2,LGALS8,RIMKLB,USP11,ASL,RGS13,SLC29A4,EBF4,PNCK,GDI1,EN2,OPTN,NDN,ZFP503,GAP43,CDH18,TUBB2A,TSPYL2,ASH2L,ACOT7,NRIP2,DYNC1I1,ZSCAN18,SAMD14,MORF4L2,CCDC39,DGKA,SMC4,TFAP2A,TBKBP1,BEX1,UCMA,MAGED1,PSME1,COL5A3,SKOR1,DPYSL5,ANAPC5,GSPT2,WDR6,SKAP2,ARXES2,SRSF5,HSP90AA1,EEF1A1,RAB34,TMEM117,RANBP17,FKBP14,SMARCA1,FAF1,EIF2S3Y,TRMT2B,PRMT2,SOX3,HSP90AB1,CC…
GO:BP	transcription by RNA polymerase II	GO:0006366	3.38945e-10	9.46987	2560	639	119	27543	ONECUT2,TWIST1,PAX2,EBF4,EN2,NDN,ASH2L,NRIP2,ZSCAN18,MORF4L2,TFAP2A,MAGED1,SKOR1,SMARCA1,SOX3,ZFP28,NFYA,STAT6,IRX5,ZFP157,RIT2,CREB3L3,DLX4,SUV39H1,MAGED2,DLX2,DMRT2,MAPK3,STAT4,RNF2,MYEF2,ZFP955A,HDAC1,TRO,NELFB,ZFP229,SIM1,HOXD8,HDAC2,2610008E11RIK,HEXIM2,LBX1,PAF1,ZFP90,ZFP383,ZFP3,ELP4,TFR2,ZFP273,BARX1,MED12,ZFP92,EN1,ZFP712,IRX2,THAP3,ABHD14B,FOXB1,IRX3,HOXC4,CTBP2,TBX2,GTF2H2,VAX2,PAX3,SI…
GO:BP	positive regulation of nucleobase-containing compound metabolic process	GO:0045935	4.44152e-10	9.35247	2049	639	102	27543	ONECUT2,TWIST1,PAX2,EBF4,EN2,NDN,ASH2L,MORF4L2,TFAP2A,MAGED1,SRSF5,HSP90AA1,SMARCA1,FAF1,PRMT2,HSP90AB1,CCT3,NFYA,STAT6,RIT2,CCT5,MID2,CREB3L3,DLX2,DMRT2,MAPK3,STAT4,HDAC1,ZFP229,HOXD8,HDAC2,HSPA8,LIN28B,CCT2,PAF1,ZFP90,CHTF18,ILK,TFR2,ZFP711,CCAR1,MED12,EN1,SRSF1,THAP3,CCT8,ABHD14B,IRX3,HOXC4,CTBP2,TBX2,PAX3,SIRT1,PWP1,DDX5,TFAP4,PCBD2,ZFP64,ACTR5,HNRNPA2B1,TRIM27,ZFP53,NHLH2,MEIS1,AATF,LHX5,ASX…
GO:BP	catabolic process	GO:0009056	1.30409e-09	8.88469	2454	639	114	27543	TWIST1,GPRASP1,LGALS8,USP11,OPTN,ACOT7,PAFAH1B3,PSME1,ANAPC5,GSPT2,WDR6,HSP90AA1,FAF1,HSP90AB1,RDX,ACHE,WDR41,NT5E,RRAGB,HSD17B11,SAMHD1,GPI1,ACADVL,MAOA,NAGK,ADAM15,DPP7,MID2,GAA,GGACT,LTA4H,MAPK3,INPP5F,ACAA1A,MYEF2,PRDX3,HSPA8,LIN28B,SGSH,METTL20,ECHDC2,SHARPIN,BCAP31,ARRDC1,DIS3,PSME2,H13,UPF3B,SCFD1,SNX4,CYP27A1,TMEM150A,CPT1C,ATG16L2,SRSF1,CNOT10,PGD,AHCY,TAF15,MCCC2,SIRT1,GSTM4,MAN2C1,ABCD…
GO:BP	positive regulation of cellular process	GO:0048522	1.37966e-09	8.86023	6072	639	219	27543	ONECUT2,TWIST1,PAX2,LGALS8,EBF4,GDI1,EN2,OPTN,NDN,ASH2L,MORF4L2,SMC4,TFAP2A,BEX1,MAGED1,PSME1,ANAPC5,SRSF5,HSP90AA1,EEF1A1,SMARCA1,FAF1,EIF2S3Y,PRMT2,HSP90AB1,CCT3,GRB10,RDX,DPYSL3,STIL,ACHE,NFYA,STAT6,NINJ1,RRAGB,RIT2,CD99L2,GKAP1,GPI1,STK3,TAOK3,MAOA,CCT5,MID2,CORO1C,CREB3L3,RRM2B,SUV39H1,PGRMC1,TPX2,RAB27A,DLX2,TERF2IP,DMRT2,MAPK3,TIA1,FCHSD1,INPP5F,STAT4,TELO2,PHF1,HDAC1,VASP,ZFP229,HOXD8,HDA…
GO:BP	positive regulation of nitrogen compound metabolic process	GO:0051173	2.00369e-09	8.69817	3177	639	136	27543	ONECUT2,TWIST1,PAX2,EBF4,EN2,NDN,ASH2L,MORF4L2,TFAP2A,MAGED1,PSME1,SRSF5,HSP90AA1,SMARCA1,FAF1,EIF2S3Y,PRMT2,HSP90AB1,CCT3,RDX,NFYA,STAT6,RIT2,TAOK3,CCT5,MID2,CREB3L3,SUV39H1,TPX2,DLX2,TERF2IP,DMRT2,MAPK3,STAT4,TELO2,PHF1,HDAC1,ZFP229,HOXD8,HDAC2,NNMT,HSPA8,LIN28B,CCT2,PAF1,ABCB10,ZFP90,FUZ,BCAP31,CHTF18,ILK,TFR2,ZFP711,CCAR1,PSME2,UPF3B,MED12,EN1,SRSF1,THAP3,CCT8,ABHD14B,IRX3,HOXC4,CTBP2,TBX2,PA…
GO:BP	nitrogen compound metabolic process	GO:0006807	2.48415e-09	8.60482	12531	639	379	27543	ONECUT2,SFMBT2,TWIST1,ECE2,PAX2,RIMKLB,USP11,ASL,EBF4,PNCK,EN2,NDN,ZFP503,TSPYL2,ASH2L,ACOT7,NRIP2,ZSCAN18,MORF4L2,SMC4,TFAP2A,MAGED1,PSME1,SKOR1,ANAPC5,GSPT2,WDR6,ARXES2,SRSF5,HSP90AA1,EEF1A1,FKBP14,SMARCA1,FAF1,EIF2S3Y,TRMT2B,PRMT2,SOX3,HSP90AB1,CCT3,CD200,RDX,ZFP28,APEH,SNCAIP,ELAC1,SAT2,MMAB,MACROD1,ACHE,PRPS1L3,NFYA,NT5E,STAT6,IRX5,SRSF2,ZFP157,CDC45,RIT2,SAMHD1,GPI1,STK3,ORC3,PRSS16,DUS2,HS…
GO:BP	cellular catabolic process	GO:0044248	2.73761e-09	8.56263	2111	639	102	27543	TWIST1,GPRASP1,LGALS8,USP11,OPTN,ACOT7,PSME1,ANAPC5,GSPT2,WDR6,HSP90AA1,FAF1,HSP90AB1,RDX,ACHE,WDR41,NT5E,RRAGB,SAMHD1,ACADVL,MAOA,NAGK,DPP7,MID2,GAA,LTA4H,MAPK3,INPP5F,ACAA1A,MYEF2,PRDX3,HSPA8,LIN28B,SGSH,METTL20,ECHDC2,SHARPIN,BCAP31,ARRDC1,DIS3,PSME2,H13,UPF3B,SCFD1,SNX4,CPT1C,ATG16L2,SRSF1,CNOT10,PGD,AHCY,TAF15,MCCC2,SIRT1,GSTM4,ABCD4,HTRA2,FYCO1,TMUB1,DIS3L,DDX5,NT5C1A,RNF215,TRIM27,ILVBL,TR…
GO:BP	cellular macromolecule metabolic process	GO:0044260	2.91732e-09	8.53502	5820	639	211	27543	TWIST1,GPRASP1,PAX2,RIMKLB,USP11,PNCK,OPTN,NDN,TSPYL2,ASH2L,MORF4L2,SMC4,MAGED1,PSME1,ANAPC5,GSPT2,WDR6,ARXES2,HSP90AA1,EEF1A1,FKBP14,FAF1,EIF2S3Y,TRMT2B,PRMT2,HSP90AB1,CCT3,GRB10,RDX,MACROD1,ACHE,NFYA,STAT6,CDC45,RIT2,SAMHD1,GPI1,STK3,ORC3,HS6ST2,TAOK3,RNF25,BEX4,CCT5,DPP7,CORO1C,NRBP1,RRM2B,GAA,SUV39H1,TPX2,LTA4H,PRIM1,TERF2IP,MAPK3,TIA1,INPP5F,STK33,MLH3,RNF2,TELO2,PHF1,MYEF2,HDAC1,HDAC2,NNMT,…
GO:BP	positive regulation of metabolic process	GO:0009893	7.10301e-09	8.14856	3908	639	156	27543	ONECUT2,TWIST1,PAX2,EBF4,EN2,OPTN,NDN,ASH2L,MORF4L2,TFAP2A,MAGED1,PSME1,SRSF5,HSP90AA1,SMARCA1,FAF1,EIF2S3Y,PRMT2,HSP90AB1,CCT3,GRB10,CD200,RDX,ACHE,NFYA,STAT6,RIT2,GPI1,TAOK3,CCT5,MID2,CREB3L3,SUV39H1,TPX2,RAB27A,DLX2,TERF2IP,DMRT2,MAPK3,INPP5F,STAT4,TELO2,PHF1,HDAC1,ZFP229,HOXD8,HDAC2,NNMT,HSPA8,LIN28B,CCT2,C1QTNF2,PAF1,ABCB10,ZFP90,FUZ,BCAP31,CHTF18,ILK,TFR2,ZFP711,CCAR1,PSME2,UPF3B,MED12,SNX4…
GO:BP	regulation of gene expression	GO:0010468	1.00312e-08	7.99865	5415	639	198	27543	ONECUT2,SFMBT2,TWIST1,PAX2,EBF4,EN2,OPTN,NDN,ZFP503,ASH2L,NRIP2,ZSCAN18,MORF4L2,TFAP2A,MAGED1,SKOR1,GSPT2,SRSF5,HSP90AA1,SMARCA1,FAF1,EIF2S3Y,PRMT2,SOX3,HSP90AB1,CD200,RDX,ZFP28,NFYA,STAT6,IRX5,SRSF2,BBS2,ZFP157,RIT2,GPI1,STK3,RNF25,MID2,CREB3L3,DLX4,SUV39H1,MAGED2,RAB27A,DLX2,TERF2IP,DMRT2,MAPK3,TIA1,STAT4,RNF2,PHF1,MYEF2,ZFP955A,HDAC1,TRO,NELFB,ZFP229,SIM1,HOXD8,HDAC2,PRDX3,HSPA8,LIN28B,2610008…
GO:BP	organic cyclic compound metabolic process	GO:1901360	1.23509e-08	7.9083	8713	639	284	27543	ONECUT2,SFMBT2,TWIST1,PAX2,EBF4,EN2,NDN,ZFP503,TSPYL2,ASH2L,ACOT7,NRIP2,ZSCAN18,MORF4L2,SMC4,TFAP2A,MAGED1,SKOR1,GSPT2,WDR6,SRSF5,HSP90AA1,SMARCA1,FAF1,TRMT2B,PRMT2,SOX3,HSP90AB1,CCT3,CD200,ZFP28,SNCAIP,ELAC1,MMAB,MACROD1,PRPS1L3,NFYA,NT5E,STAT6,IRX5,SRSF2,ZFP157,CDC45,RIT2,HSD17B11,SAMHD1,GPI1,STK3,ORC3,CYB5R1,ACADVL,DUS2,TAOK3,RNF25,MAOA,UCKL1,CCT5,MID2,CREB3L3,DLX4,RRM2B,SUV39H1,PGRMC1,MAGED2,…
GO:BP	developmental process	GO:0032502	1.69289e-08	7.77137	6788	639	234	27543	ONECUT2,TWIST1,FHL1,PAX2,LGALS8,ASL,GDI1,EN2,NDN,ZFP503,GAP43,CDH18,TUBB2A,SAMD14,PAFAH1B3,MORF4L2,CCDC39,BEX1,UCMA,MAGED1,SCAPER,DPYSL5,ARXES2,SRSF5,HSP90AA1,EEF1A1,SMARCA1,SOX3,HSP90AB1,RDX,DPYSL3,SEC24D,ACHE,PRPS1L3,STAT6,NINJ1,IRX5,BBS2,ZFP157,RIT2,TUFT1,SAMHD1,RHOU,GPI1,STK3,ACADVL,TAOK3,ADAM15,CORO1C,DLX4,RRM2B,GAA,SUV39H1,RAB27A,DLX2,LTA4H,DMRT2,MAPK3,INPP5F,CHL1,RNF2,TRPC4,FPGS,HDAC1,VASP…
GO:BP	positive regulation of macromolecule metabolic process	GO:0010604	2.42881e-08	7.61461	3592	639	145	27543	ONECUT2,TWIST1,PAX2,EBF4,EN2,OPTN,NDN,ASH2L,MORF4L2,TFAP2A,MAGED1,PSME1,SRSF5,HSP90AA1,SMARCA1,FAF1,EIF2S3Y,PRMT2,HSP90AB1,CCT3,CD200,RDX,NFYA,STAT6,RIT2,GPI1,TAOK3,CCT5,MID2,CREB3L3,SUV39H1,TPX2,RAB27A,DLX2,TERF2IP,DMRT2,MAPK3,INPP5F,STAT4,TELO2,PHF1,HDAC1,ZFP229,HOXD8,HDAC2,NNMT,HSPA8,LIN28B,CCT2,C1QTNF2,PAF1,ABCB10,ZFP90,FUZ,BCAP31,CHTF18,ILK,TFR2,ZFP711,CCAR1,PSME2,UPF3B,MED12,EN1,SRSF1,THAP3…
GO:BP	organonitrogen compound metabolic process	GO:1901564	4.6765e-08	7.33008	6512	639	225	27543	TWIST1,ECE2,PAX2,RIMKLB,USP11,ASL,PNCK,NDN,TSPYL2,ASH2L,ACOT7,NRIP2,MORF4L2,MAGED1,PSME1,ANAPC5,GSPT2,ARXES2,HSP90AA1,EEF1A1,FKBP14,FAF1,EIF2S3Y,PRMT2,HSP90AB1,RDX,APEH,SNCAIP,SAT2,MMAB,MACROD1,PRPS1L3,NFYA,NT5E,RIT2,SAMHD1,GPI1,STK3,PRSS16,HS6ST2,TAOK3,RNF25,BEX4,MAOA,NAGK,UCKL1,ADAM15,DPP7,CORO1C,NRBP1,VBP1,SUV39H1,PGRMC1,GGACT,TPX2,LTA4H,TERF2IP,MRI1,MAPK3,TIA1,INPP5F,STK33,RNF2,TELO2,PHF1,FPG…
GO:BP	positive regulation of biological process	GO:0048518	4.92581e-08	7.30752	6629	639	228	27543	ONECUT2,TWIST1,FHL1,PAX2,LGALS8,EBF4,GDI1,EN2,OPTN,NDN,ASH2L,MORF4L2,SMC4,TFAP2A,BEX1,MAGED1,PSME1,ANAPC5,SRSF5,HSP90AA1,EEF1A1,SMARCA1,FAF1,EIF2S3Y,PRMT2,HSP90AB1,CCT3,GRB10,CD200,RDX,DPYSL3,STIL,ACHE,NFYA,STAT6,NINJ1,BBS2,RRAGB,RIT2,CD99L2,GKAP1,GPI1,STK3,TAOK3,MAOA,CCT5,MID2,CORO1C,CREB3L3,RRM2B,SUV39H1,PGRMC1,SYNGR3,TPX2,RAB27A,DLX2,TERF2IP,DMRT2,MAPK3,TIA1,FCHSD1,INPP5F,STAT4,TELO2,PHF1,HDAC…
GO:BP	biological regulation	GO:0065007	5.88759e-08	7.23006	14043	639	408	27543	ONECUT2,SFMBT2,TWIST1,FHL1,ECE2,GPRASP1,PAX2,LGALS8,GPRASP2,RGS13,SLC29A4,EBF4,GDI1,EN2,OPTN,NDN,ZFP503,GAP43,TSPYL2,ASH2L,NRIP2,ZSCAN18,SAMD14,MORF4L2,CCDC39,DGKA,SMC4,TFAP2A,TBKBP1,BEX1,UCMA,MAGED1,PSME1,SKOR1,ANAPC5,GSPT2,WDR6,SKAP2,SRSF5,HSP90AA1,EEF1A1,TMEM117,SMARCA1,FAF1,EIF2S3Y,PRMT2,SOX3,HSP90AB1,CCT3,GRB10,CD200,RDX,DPYSL3,ZFP28,SNCAIP,STIL,ACHE,NFYA,WDR41,NT5E,STAT6,NINJ1,IRX5,SRSF2,BB…
GO:BP	regulation of cellular process	GO:0050794	7.01561e-08	7.15393	12487	639	372	27543	ONECUT2,SFMBT2,TWIST1,FHL1,GPRASP1,PAX2,LGALS8,RGS13,EBF4,GDI1,EN2,OPTN,NDN,ZFP503,GAP43,TSPYL2,ASH2L,NRIP2,ZSCAN18,SAMD14,MORF4L2,CCDC39,DGKA,SMC4,TFAP2A,TBKBP1,BEX1,UCMA,MAGED1,PSME1,SKOR1,ANAPC5,WDR6,SKAP2,SRSF5,HSP90AA1,EEF1A1,TMEM117,SMARCA1,FAF1,EIF2S3Y,PRMT2,SOX3,HSP90AB1,CCT3,GRB10,CD200,RDX,DPYSL3,ZFP28,SNCAIP,STIL,ACHE,NFYA,WDR41,STAT6,NINJ1,IRX5,SRSF2,BBS2,RRAGB,ZFP157,RIT2,CD99L2,TUFT…
GO:BP	cellular nitrogen compound metabolic process	GO:0034641	7.05016e-08	7.1518	9118	639	291	27543	ONECUT2,SFMBT2,TWIST1,ECE2,PAX2,ASL,EBF4,EN2,NDN,ZFP503,TSPYL2,ASH2L,ACOT7,NRIP2,ZSCAN18,MORF4L2,SMC4,TFAP2A,MAGED1,SKOR1,GSPT2,WDR6,ARXES2,SRSF5,HSP90AA1,EEF1A1,SMARCA1,FAF1,EIF2S3Y,TRMT2B,PRMT2,SOX3,HSP90AB1,CCT3,CD200,ZFP28,APEH,SNCAIP,ELAC1,SAT2,MACROD1,PRPS1L3,NFYA,NT5E,STAT6,IRX5,SRSF2,ZFP157,CDC45,RIT2,SAMHD1,GPI1,STK3,ORC3,DUS2,TAOK3,RNF25,MAOA,NAGK,UCKL1,CCT5,MID2,CREB3L3,DLX4,RRM2B,SUV3…
GO:BP	cellular aromatic compound metabolic process	GO:0006725	7.92215e-08	7.10116	8487	639	275	27543	ONECUT2,SFMBT2,TWIST1,PAX2,EBF4,EN2,NDN,ZFP503,TSPYL2,ASH2L,ACOT7,NRIP2,ZSCAN18,MORF4L2,SMC4,TFAP2A,MAGED1,SKOR1,GSPT2,WDR6,SRSF5,HSP90AA1,SMARCA1,FAF1,TRMT2B,PRMT2,SOX3,HSP90AB1,CCT3,CD200,ZFP28,SNCAIP,ELAC1,MMAB,MACROD1,PRPS1L3,NFYA,NT5E,STAT6,IRX5,SRSF2,ZFP157,CDC45,RIT2,SAMHD1,GPI1,STK3,ORC3,DUS2,TAOK3,RNF25,MAOA,UCKL1,CCT5,MID2,CREB3L3,DLX4,RRM2B,SUV39H1,PGRMC1,MAGED2,DLX2,PRIM1,TERF2IP,PABP…
GO:BP	positive regulation of macromolecule biosynthetic process	GO:0010557	1.21322e-07	6.91606	1911	639	91	27543	ONECUT2,TWIST1,PAX2,EBF4,EN2,NDN,ASH2L,MORF4L2,TFAP2A,MAGED1,HSP90AA1,SMARCA1,EIF2S3Y,PRMT2,HSP90AB1,CCT3,NFYA,STAT6,RIT2,CCT5,MID2,CREB3L3,DLX2,DMRT2,MAPK3,STAT4,HDAC1,ZFP229,HOXD8,HDAC2,CCT2,C1QTNF2,ABCB10,ZFP90,CHTF18,ILK,TFR2,ZFP711,CCAR1,UPF3B,MED12,EN1,THAP3,CCT8,ABHD14B,IRX3,HOXC4,CTBP2,TBX2,PAX3,SIRT1,PWP1,TFAP4,PCBD2,ZFP64,ACTR5,TRIM27,ZFP53,NHLH2,MEIS1,AATF,LHX5,ASXL3,HNF1B,MYBL1,PAX7,T…
GO:BP	heterocycle metabolic process	GO:0046483	1.35895e-07	6.8668	8407	639	272	27543	ONECUT2,SFMBT2,TWIST1,PAX2,EBF4,EN2,NDN,ZFP503,TSPYL2,ASH2L,ACOT7,NRIP2,ZSCAN18,MORF4L2,SMC4,TFAP2A,MAGED1,SKOR1,GSPT2,WDR6,SRSF5,HSP90AA1,SMARCA1,FAF1,TRMT2B,PRMT2,SOX3,HSP90AB1,CCT3,CD200,ZFP28,ELAC1,MMAB,MACROD1,PRPS1L3,NFYA,NT5E,STAT6,IRX5,SRSF2,ZFP157,CDC45,RIT2,SAMHD1,GPI1,STK3,ORC3,DUS2,TAOK3,RNF25,MAOA,UCKL1,CCT5,MID2,CREB3L3,DLX4,RRM2B,SUV39H1,PGRMC1,MAGED2,DLX2,PRIM1,TERF2IP,PABPN1,DMRT…
GO:BP	positive regulation of cellular biosynthetic process	GO:0031328	2.49003e-07	6.6038	2030	639	94	27543	ONECUT2,TWIST1,PAX2,EBF4,EN2,NDN,ASH2L,MORF4L2,TFAP2A,MAGED1,HSP90AA1,SMARCA1,EIF2S3Y,PRMT2,HSP90AB1,CCT3,NFYA,STAT6,RIT2,CCT5,MID2,CREB3L3,DLX2,DMRT2,MAPK3,STAT4,HDAC1,ZFP229,HOXD8,HDAC2,NNMT,CCT2,C1QTNF2,ABCB10,ZFP90,CHTF18,ILK,TFR2,ZFP711,CCAR1,UPF3B,MED12,EN1,THAP3,CCT8,ABHD14B,IRX3,HOXC4,CTBP2,TBX2,PAX3,SIRT1,PWP1,TFAP4,PCBD2,ZFP64,ACTR5,TRIM27,ZFP53,NHLH2,MEIS1,PLIN5,AATF,LHX5,ASXL3,TAZ,HNF…
GO:BP	regulation of biological process	GO:0050789	2.58619e-07	6.58734	13329	639	389	27543	ONECUT2,SFMBT2,TWIST1,FHL1,GPRASP1,PAX2,LGALS8,RGS13,EBF4,GDI1,EN2,OPTN,NDN,ZFP503,GAP43,TSPYL2,ASH2L,NRIP2,ZSCAN18,SAMD14,MORF4L2,CCDC39,DGKA,SMC4,TFAP2A,TBKBP1,BEX1,UCMA,MAGED1,PSME1,SKOR1,ANAPC5,GSPT2,WDR6,SKAP2,SRSF5,HSP90AA1,EEF1A1,TMEM117,SMARCA1,FAF1,EIF2S3Y,PRMT2,SOX3,HSP90AB1,CCT3,GRB10,CD200,RDX,DPYSL3,ZFP28,SNCAIP,STIL,ACHE,NFYA,WDR41,NT5E,STAT6,NINJ1,IRX5,SRSF2,BBS2,RRAGB,ZFP157,RIT2,…
GO:BP	organelle organization	GO:0006996	2.96934e-07	6.52734	3787	639	147	27543	ONECUT2,OPTN,NDN,GAP43,TUBB2A,TSPYL2,ASH2L,SAMD14,MORF4L2,CCDC39,SMC4,ANAPC5,HSP90AA1,RAB34,SMARCA1,HSP90AB1,CCT3,RDX,DPYSL3,STIL,SEC24D,BBS2,CDC45,MSTO1,TSPYL3,RHOU,TMEM43,CCT5,CENPC1,CORO1C,RRM2B,GAA,SUV39H1,HAUS4,TPX2,RAB27A,TERF2IP,COX20,MAPK3,TIA1,FCHSD1,MLH3,TUBA1A,TELO2,PHF1,HDAC1,VASP,HDAC2,TPPP3,MAST1,KIZ,PRDX3,AIFM2,HSPA8,ZWINT,CCT2,SHARPIN,VDAC3,FUZ,BCAP31,CHTF18,MTBP,HOOK2,ATAT1,ILK,C…
GO:BP	positive regulation of biosynthetic process	GO:0009891	4.05987e-07	6.39149	2080	639	95	27543	ONECUT2,TWIST1,PAX2,EBF4,EN2,NDN,ASH2L,MORF4L2,TFAP2A,MAGED1,HSP90AA1,SMARCA1,EIF2S3Y,PRMT2,HSP90AB1,CCT3,NFYA,STAT6,RIT2,CCT5,MID2,CREB3L3,RAB27A,DLX2,DMRT2,MAPK3,STAT4,HDAC1,ZFP229,HOXD8,HDAC2,NNMT,CCT2,C1QTNF2,ABCB10,ZFP90,CHTF18,ILK,TFR2,ZFP711,CCAR1,UPF3B,MED12,EN1,THAP3,CCT8,ABHD14B,IRX3,HOXC4,CTBP2,TBX2,PAX3,SIRT1,PWP1,TFAP4,PCBD2,ZFP64,ACTR5,TRIM27,ZFP53,NHLH2,MEIS1,PLIN5,AATF,LHX5,ASXL3,…
GO:BP	positive regulation of RNA metabolic process	GO:0051254	1.00941e-06	5.99593	1836	639	86	27543	ONECUT2,TWIST1,PAX2,EBF4,EN2,NDN,ASH2L,MORF4L2,TFAP2A,MAGED1,SRSF5,SMARCA1,PRMT2,NFYA,STAT6,RIT2,MID2,CREB3L3,DLX2,DMRT2,MAPK3,STAT4,HDAC1,ZFP229,HOXD8,HDAC2,HSPA8,LIN28B,PAF1,ZFP90,ILK,TFR2,ZFP711,CCAR1,MED12,EN1,SRSF1,THAP3,ABHD14B,IRX3,HOXC4,CTBP2,TBX2,PAX3,SIRT1,PWP1,DDX5,TFAP4,PCBD2,ZFP64,ACTR5,TRIM27,ZFP53,NHLH2,MEIS1,AATF,LHX5,ASXL3,HNF1B,MYBL1,PAX7,TRP53,LHX4,MET,PRKDC,ZFP516,ZFP677,NIF3L…
GO:BP	anatomical structure development	GO:0048856	1.01294e-06	5.99442	6186	639	211	27543	ONECUT2,TWIST1,FHL1,PAX2,LGALS8,ASL,GDI1,EN2,NDN,GAP43,CDH18,TUBB2A,SAMD14,PAFAH1B3,MORF4L2,CCDC39,BEX1,UCMA,MAGED1,SCAPER,DPYSL5,SRSF5,HSP90AA1,EEF1A1,SMARCA1,HSP90AB1,RDX,DPYSL3,SEC24D,ACHE,PRPS1L3,STAT6,NINJ1,IRX5,BBS2,ZFP157,RIT2,TUFT1,SAMHD1,RHOU,GPI1,STK3,ACADVL,TAOK3,ADAM15,CORO1C,RRM2B,GAA,SUV39H1,DLX2,LTA4H,DMRT2,MAPK3,INPP5F,CHL1,RNF2,TRPC4,FPGS,HDAC1,VASP,SIM1,HOXD8,HDAC2,TPPP3,NNMT,SP…
GO:BP	animal organ development	GO:0048513	1.07158e-06	5.96998	3856	639	147	27543	ONECUT2,TWIST1,FHL1,PAX2,LGALS8,ASL,EN2,PAFAH1B3,CCDC39,MAGED1,SCAPER,SRSF5,HSP90AA1,SMARCA1,HSP90AB1,ACHE,STAT6,NINJ1,IRX5,BBS2,ZFP157,TUFT1,STK3,ADAM15,CORO1C,RRM2B,GAA,SUV39H1,DLX2,LTA4H,MAPK3,FPGS,HDAC1,SIM1,HOXD8,HDAC2,TPPP3,NNMT,SPARC,MAST1,PRDX3,HSPA8,CHRNB2,LBX1,PAF1,SLC25A38,ABCB10,PRKRA,SHARPIN,FUZ,ALOXE3,ATIC,ATAT1,ILK,LHFPL5,CEP120,LATS2,BARX1,MED12,ZC4H2,MYL6B,EN1,CLRN1,POFUT1,IRX2,C…
GO:BP	negative regulation of cellular process	GO:0048523	1.2174e-06	5.91457	5155	639	183	27543	ONECUT2,SFMBT2,TWIST1,FHL1,GPRASP1,PAX2,RGS13,GDI1,EN2,OPTN,NDN,ZFP503,TSPYL2,NRIP2,BEX1,UCMA,MAGED1,SKOR1,WDR6,SKAP2,EEF1A1,PRMT2,HSP90AB1,GRB10,CD200,RDX,DPYSL3,STAT6,ZFP157,RIT2,SAMHD1,GPI1,STK3,ACADVL,DUS2,TAOK3,BEX4,ADAM15,CORO1C,DLX4,RRM2B,VBP1,SUV39H1,PGRMC1,TPX2,MAGED2,DLX2,TERF2IP,TIA1,INPP5F,CHL1,STK33,RNF2,PHF1,MYEF2,ZFP955A,HDAC1,TRO,NELFB,HOXD8,HDAC2,SPARC,PRDX3,AIFM2,NAA16,HSPA8,ZWI…
GO:BP	nervous system development	GO:0007399	1.29399e-06	5.88807	2479	639	106	27543	ONECUT2,TWIST1,GDI1,EN2,NDN,GAP43,TUBB2A,SAMD14,PAFAH1B3,CCDC39,BEX1,DPYSL5,HSP90AA1,EEF1A1,SMARCA1,HSP90AB1,DPYSL3,ACHE,PRPS1L3,IRX5,BBS2,RIT2,STK3,TAOK3,DLX2,MAPK3,INPP5F,CHL1,TRPC4,FPGS,HDAC1,VASP,SIM1,HDAC2,MAST1,HSPA8,CHRNB2,LBX1,SHARPIN,FUZ,ATIC,ATAT1,ILK,LHFPL5,CEP120,STMN2,MED12,ZC4H2,EN1,CLRN1,POFUT1,IRX2,TCTN1,FOXB1,IRX3,GSTP1,ABCB6,TBX2,VAX2,PAX3,SIRT1,HTRA2,SEMA6C,CERS2,ARL6,BLOC1S5,D…
GO:BP	cellular response to stress	GO:0033554	2.22028e-06	5.65359	1866	639	86	27543	TWIST1,OPTN,GAP43,ASH2L,MORF4L2,SMC4,BEX1,HSP90AA1,TMEM117,FAF1,HSP90AB1,MACROD1,STAT6,RRAGB,CDC45,SAMHD1,STK3,TAOK3,CREB3L3,RRM2B,SUV39H1,TERF2IP,MAPK3,INPP5F,CHL1,STK33,MLH3,PHF1,MYEF2,HDAC2,PRDX3,AIFM2,HSPA8,ABCB10,PRKRA,BCAP31,ASCC1,H13,RHNO1,GSTP1,TBX2,GTF2H2,SIRT1,HTRA2,CERS2,RPS6KA6,TMUB1,PARP2,EME2,DDX5,TFAP4,HSPD1,ACTR5,FKBP1B,MBIP,AATF,CAPN1,ITFG2,HDAC10,FBXO6,DMAP1,HMCES,TRP53,MET,PRKD…
GO:BP	DNA metabolic process	GO:0006259	4.05794e-06	5.39169	976	639	55	27543	TWIST1,TSPYL2,MORF4L2,SMC4,HSP90AA1,FAF1,HSP90AB1,CCT3,STAT6,CDC45,SAMHD1,ORC3,TAOK3,CCT5,RRM2B,SUV39H1,PRIM1,TERF2IP,MAPK3,MLH3,TELO2,CCT2,CHTF18,ASCC1,TOP1MT,CCT8,HFM1,RHNO1,GTF2H2,SIRT1,POLA2,PARP2,EME2,HSPD1,RDM1,ACTR5,HNRNPA2B1,MEI4,HDAC10,FBXO6,DMAP1,HMCES,TRP53,PRKDC,RAD21L,CCDC117,RAD51,HMGN1,RNF138RT1,TONSL,HELB,RTEL1,XPA,APEX1,FGF10
GO:BP	multicellular organism development	GO:0007275	6.80709e-06	5.16704	5045	639	177	27543	ONECUT2,TWIST1,PAX2,LGALS8,ASL,GDI1,EN2,NDN,GAP43,TUBB2A,SAMD14,PAFAH1B3,CCDC39,BEX1,UCMA,MAGED1,SCAPER,DPYSL5,SRSF5,HSP90AA1,EEF1A1,SMARCA1,HSP90AB1,DPYSL3,SEC24D,ACHE,PRPS1L3,STAT6,NINJ1,IRX5,BBS2,ZFP157,RIT2,SAMHD1,GPI1,STK3,TAOK3,ADAM15,RRM2B,GAA,SUV39H1,DLX2,LTA4H,DMRT2,MAPK3,INPP5F,CHL1,RNF2,TRPC4,FPGS,HDAC1,VASP,SIM1,HOXD8,HDAC2,TPPP3,SPARC,MAST1,PRDX3,HSPA8,CHRNB2,LBX1,PAF1,SLC25A38,ABCB1…
GO:BP	organic substance catabolic process	GO:1901575	6.92077e-06	5.15985	2069	639	91	27543	TWIST1,GPRASP1,USP11,ACOT7,PAFAH1B3,PSME1,ANAPC5,GSPT2,HSP90AA1,FAF1,HSP90AB1,RDX,ACHE,NT5E,HSD17B11,SAMHD1,GPI1,ACADVL,MAOA,NAGK,DPP7,GAA,GGACT,LTA4H,INPP5F,ACAA1A,MYEF2,HSPA8,LIN28B,SGSH,METTL20,ECHDC2,SHARPIN,BCAP31,ARRDC1,DIS3,PSME2,H13,UPF3B,CYP27A1,CPT1C,SRSF1,CNOT10,PGD,AHCY,TAF15,MCCC2,SIRT1,MAN2C1,ABCD4,HTRA2,TMUB1,DIS3L,DDX5,NT5C1A,RNF215,ILVBL,TRAF3IP2,GMPR2,RNF128,PLIN5,UCHL1,CAPN1,PL…
GO:BP	negative regulation of biological process	GO:0048519	8.83108e-06	5.05399	5996	639	202	27543	ONECUT2,SFMBT2,TWIST1,FHL1,GPRASP1,PAX2,RGS13,GDI1,EN2,OPTN,NDN,ZFP503,TSPYL2,NRIP2,BEX1,UCMA,MAGED1,SKOR1,GSPT2,WDR6,SKAP2,EEF1A1,PRMT2,HSP90AB1,GRB10,CD200,RDX,DPYSL3,NT5E,STAT6,BBS2,ZFP157,RIT2,SAMHD1,GPI1,STK3,ACADVL,DUS2,TAOK3,BEX4,ADAM15,MID2,CORO1C,DLX4,RRM2B,VBP1,SUV39H1,PGRMC1,TPX2,MAGED2,DLX2,TERF2IP,TIA1,INPP5F,CHL1,STK33,RNF2,PHF1,MYEF2,ZFP955A,HDAC1,TRO,NELFB,HOXD8,HDAC2,SPARC,PRDX3,…
GO:BP	central nervous system development	GO:0007417	1.06388e-05	4.97311	1031	639	56	27543	EN2,NDN,PAFAH1B3,CCDC39,HSP90AA1,SMARCA1,HSP90AB1,BBS2,STK3,DLX2,MAPK3,TRPC4,FPGS,HDAC1,HDAC2,MAST1,HSPA8,CHRNB2,LBX1,SHARPIN,FUZ,ATIC,ATAT1,CEP120,MED12,ZC4H2,EN1,TCTN1,FOXB1,GSTP1,ABCB6,VAX2,PAX3,HTRA2,ARL6,DNAH5,NHLH2,MEIS1,LHX5,EFNA2,BBS7,HNF1B,PAX7,TRP53,LHX4,PLXNA3,PRKDC,RAC3,STK36,LHX1,CITED2,LAMB1,HOXB2,OTP,TRP73,FGF10
GO:BP	nucleobase-containing compound metabolic process	GO:0006139	1.16373e-05	4.93415	8271	639	260	27543	ONECUT2,SFMBT2,TWIST1,PAX2,EBF4,EN2,NDN,ZFP503,TSPYL2,ASH2L,ACOT7,NRIP2,ZSCAN18,MORF4L2,SMC4,TFAP2A,MAGED1,SKOR1,GSPT2,WDR6,SRSF5,HSP90AA1,SMARCA1,FAF1,TRMT2B,PRMT2,SOX3,HSP90AB1,CCT3,CD200,ZFP28,ELAC1,MACROD1,PRPS1L3,NFYA,NT5E,STAT6,IRX5,SRSF2,ZFP157,CDC45,RIT2,SAMHD1,GPI1,STK3,ORC3,DUS2,TAOK3,RNF25,UCKL1,CCT5,MID2,CREB3L3,DLX4,RRM2B,SUV39H1,MAGED2,DLX2,PRIM1,TERF2IP,PABPN1,DMRT2,MAPK3,TIA1,MLH3…
GO:BP	positive regulation of transcription, DNA-templated	GO:0045893	1.33524e-05	4.87444	1688	639	78	27543	ONECUT2,TWIST1,PAX2,EBF4,EN2,NDN,ASH2L,MORF4L2,TFAP2A,MAGED1,SMARCA1,PRMT2,NFYA,STAT6,RIT2,MID2,CREB3L3,DLX2,DMRT2,MAPK3,STAT4,HDAC1,ZFP229,HOXD8,HDAC2,ZFP90,ILK,TFR2,ZFP711,CCAR1,MED12,EN1,THAP3,ABHD14B,IRX3,HOXC4,CTBP2,TBX2,PAX3,SIRT1,PWP1,TFAP4,PCBD2,ZFP64,ACTR5,TRIM27,ZFP53,NHLH2,MEIS1,AATF,LHX5,ASXL3,HNF1B,MYBL1,PAX7,TRP53,LHX4,MET,PRKDC,ZFP516,ZFP677,NIF3L1,CRTC2,AW146154,LHX1,POU4F2,SUPT20…
GO:BP	positive regulation of nucleic acid-templated transcription	GO:1903508	1.33524e-05	4.87444	1688	639	78	27543	ONECUT2,TWIST1,PAX2,EBF4,EN2,NDN,ASH2L,MORF4L2,TFAP2A,MAGED1,SMARCA1,PRMT2,NFYA,STAT6,RIT2,MID2,CREB3L3,DLX2,DMRT2,MAPK3,STAT4,HDAC1,ZFP229,HOXD8,HDAC2,ZFP90,ILK,TFR2,ZFP711,CCAR1,MED12,EN1,THAP3,ABHD14B,IRX3,HOXC4,CTBP2,TBX2,PAX3,SIRT1,PWP1,TFAP4,PCBD2,ZFP64,ACTR5,TRIM27,ZFP53,NHLH2,MEIS1,AATF,LHX5,ASXL3,HNF1B,MYBL1,PAX7,TRP53,LHX4,MET,PRKDC,ZFP516,ZFP677,NIF3L1,CRTC2,AW146154,LHX1,POU4F2,SUPT20…
GO:BP	positive regulation of RNA biosynthetic process	GO:1902680	1.55875e-05	4.80722	1694	639	78	27543	ONECUT2,TWIST1,PAX2,EBF4,EN2,NDN,ASH2L,MORF4L2,TFAP2A,MAGED1,SMARCA1,PRMT2,NFYA,STAT6,RIT2,MID2,CREB3L3,DLX2,DMRT2,MAPK3,STAT4,HDAC1,ZFP229,HOXD8,HDAC2,ZFP90,ILK,TFR2,ZFP711,CCAR1,MED12,EN1,THAP3,ABHD14B,IRX3,HOXC4,CTBP2,TBX2,PAX3,SIRT1,PWP1,TFAP4,PCBD2,ZFP64,ACTR5,TRIM27,ZFP53,NHLH2,MEIS1,AATF,LHX5,ASXL3,HNF1B,MYBL1,PAX7,TRP53,LHX4,MET,PRKDC,ZFP516,ZFP677,NIF3L1,CRTC2,AW146154,LHX1,POU4F2,SUPT20…
GO:BP	system development	GO:0048731	3.6896e-05	4.43302	4533	639	160	27543	ONECUT2,TWIST1,PAX2,LGALS8,ASL,GDI1,EN2,NDN,GAP43,TUBB2A,SAMD14,PAFAH1B3,CCDC39,BEX1,UCMA,MAGED1,SCAPER,DPYSL5,SRSF5,HSP90AA1,EEF1A1,SMARCA1,HSP90AB1,DPYSL3,ACHE,PRPS1L3,STAT6,NINJ1,IRX5,BBS2,ZFP157,RIT2,SAMHD1,STK3,TAOK3,ADAM15,RRM2B,GAA,DLX2,LTA4H,DMRT2,MAPK3,INPP5F,CHL1,TRPC4,FPGS,HDAC1,VASP,SIM1,HOXD8,HDAC2,TPPP3,SPARC,MAST1,PRDX3,HSPA8,CHRNB2,LBX1,PAF1,SLC25A38,ABCB10,PRKRA,SHARPIN,FUZ,ATIC,…
GO:BP	generation of neurons	GO:0048699	5.26071e-05	4.27896	1587	639	73	27543	ONECUT2,TWIST1,GDI1,EN2,NDN,GAP43,TUBB2A,SAMD14,BEX1,DPYSL5,HSP90AA1,EEF1A1,SMARCA1,HSP90AB1,DPYSL3,ACHE,IRX5,RIT2,TAOK3,DLX2,INPP5F,CHL1,HDAC1,VASP,HDAC2,CHRNB2,LBX1,ATAT1,ILK,LHFPL5,STMN2,ZC4H2,EN1,CLRN1,IRX2,TCTN1,FOXB1,IRX3,VAX2,PAX3,SIRT1,HTRA2,SEMA6C,CERS2,BLOC1S5,FKBP1B,RPGRIP1,NHLH2,MEIS1,UCHL1,LHX5,EFNA2,PAX7,TRP53,LHX4,PLXNA3,RAC3,MYCL,NIF3L1,FLOT1,PRMT1,DGUOK,LHX1,POU4F2,NTN4,CTF1,DACT…
GO:BP	small molecule metabolic process	GO:0044281	5.78446e-05	4.23774	1778	639	79	27543	TWIST1,ASL,ACOT7,GRB10,MMAB,MACROD1,PRPS1L3,NT5E,SAMHD1,OTOGL,GPI1,ACADVL,NAGK,UCKL1,RRM2B,LTA4H,MRI1,ACAA1A,PRPSAP1,FPGS,NNMT,AIFM2,METTL20,ECHDC2,C1QTNF2,ALOXE3,ATIC,CYP4V3,CYP27A1,FAM3A,POFUT1,CPT1C,COQ6,PGD,SPR,GSTP1,AHCY,MCCC2,PRPSAP2,SIRT1,GSTM4,MAN2C1,ABCD4,SIRT5,HARS,HARS2,ME2,PCBD2,ZFP692,MAT2A,NUCB2,NT5C1A,ILVBL,GMPR2,PLIN5,ECH1,CTPS2,TAZ,GHSR,PRPS1,AFMID,PIPOX,NUDT11,TRP53,DMGDH,CRTC2,…
GO:BP	negative regulation of cellular metabolic process	GO:0031324	7.02379e-05	4.15343	2670	639	106	27543	SFMBT2,TWIST1,PAX2,OPTN,NDN,ZFP503,TSPYL2,NRIP2,MAGED1,SKOR1,WDR6,EEF1A1,PRMT2,HSP90AB1,GRB10,STAT6,ZFP157,GPI1,ACADVL,BEX4,CORO1C,DLX4,SUV39H1,MAGED2,DLX2,TERF2IP,TIA1,INPP5F,RNF2,PHF1,MYEF2,ZFP955A,HDAC1,TRO,NELFB,HOXD8,HDAC2,PRDX3,HSPA8,LIN28B,2610008E11RIK,METTL20,HEXIM2,PAF1,ZFP90,ZFP383,ZFP3,ILK,CCAR1,LATS2,SCFD1,EN1,FAM3A,SRSF1,IRX2,CNOT10,CD109,SRSF6,IRX3,GSTP1,TAF15,CTBP2,TBX2,VAX2,PAX3,…
GO:BP	neurogenesis	GO:0022008	7.75915e-05	4.11019	1822	639	80	27543	ONECUT2,TWIST1,GDI1,EN2,NDN,GAP43,TUBB2A,SAMD14,BEX1,DPYSL5,HSP90AA1,EEF1A1,SMARCA1,HSP90AB1,DPYSL3,ACHE,IRX5,RIT2,TAOK3,DLX2,MAPK3,INPP5F,CHL1,TRPC4,HDAC1,VASP,HDAC2,CHRNB2,LBX1,ATAT1,ILK,LHFPL5,CEP120,STMN2,MED12,ZC4H2,EN1,CLRN1,IRX2,TCTN1,FOXB1,IRX3,GSTP1,TBX2,VAX2,PAX3,SIRT1,HTRA2,SEMA6C,CERS2,BLOC1S5,FKBP1B,RPGRIP1,NHLH2,MEIS1,UCHL1,LHX5,EFNA2,PAX7,TRP53,LHX4,PLXNA3,RAC3,MYCL,NIF3L1,FLOT1,PR…
GO:BP	neuron differentiation	GO:0030182	8.66372e-05	4.0623	1514	639	70	27543	ONECUT2,GDI1,EN2,NDN,GAP43,SAMD14,BEX1,DPYSL5,HSP90AA1,EEF1A1,SMARCA1,HSP90AB1,DPYSL3,ACHE,IRX5,RIT2,TAOK3,DLX2,INPP5F,CHL1,HDAC1,VASP,HDAC2,CHRNB2,LBX1,ATAT1,ILK,LHFPL5,STMN2,ZC4H2,EN1,CLRN1,IRX2,TCTN1,FOXB1,IRX3,VAX2,PAX3,SIRT1,HTRA2,SEMA6C,CERS2,BLOC1S5,FKBP1B,RPGRIP1,NHLH2,MEIS1,UCHL1,LHX5,EFNA2,PAX7,LHX4,PLXNA3,RAC3,MYCL,NIF3L1,FLOT1,PRMT1,DGUOK,LHX1,POU4F2,NTN4,CTF1,DACT1,CDKL3,LAMB1,OTP,TR…
GO:BP	cellular response to DNA damage stimulus	GO:0006974	0.000100476	3.99794	791	639	45	27543	TWIST1,ASH2L,MORF4L2,SMC4,MACROD1,CDC45,SAMHD1,TAOK3,RRM2B,SUV39H1,TERF2IP,MAPK3,STK33,MLH3,PHF1,ASCC1,RHNO1,GTF2H2,SIRT1,HTRA2,RPS6KA6,PARP2,EME2,DDX5,TFAP4,ACTR5,AATF,HDAC10,FBXO6,DMAP1,HMCES,TRP53,PRKDC,RAD21L,CCDC117,RAD51,HMGN1,RNF138RT1,TONSL,HELB,RTEL1,XPA,APEX1,TRP73,FGF10
GO:BP	positive regulation of transcription by RNA polymerase II	GO:0045944	0.000122136	3.91316	1284	639	62	27543	ONECUT2,TWIST1,PAX2,EBF4,EN2,NDN,ASH2L,MORF4L2,TFAP2A,SMARCA1,NFYA,STAT6,RIT2,CREB3L3,DLX2,DMRT2,MAPK3,STAT4,HDAC1,ZFP229,HOXD8,HDAC2,TFR2,MED12,EN1,THAP3,ABHD14B,IRX3,HOXC4,CTBP2,TBX2,PAX3,SIRT1,TFAP4,ZFP64,ZFP53,NHLH2,MEIS1,AATF,ASXL3,HNF1B,MYBL1,PAX7,TRP53,LHX4,MET,PRKDC,ZFP677,CRTC2,AW146154,POU4F2,SUPT20,MED30,GALR1,CITED2,TCEA2,XPA,APEX1,HOXB2,TRP73,FGF10,CAPRIN2
GO:BP	chromosome organization	GO:0051276	0.000125525	3.90127	1021	639	53	27543	NDN,TSPYL2,ASH2L,MORF4L2,SMC4,ANAPC5,HSP90AA1,SMARCA1,HSP90AB1,CCT3,CDC45,TSPYL3,CCT5,CENPC1,SUV39H1,TERF2IP,MAPK3,MLH3,TELO2,PHF1,HDAC1,HDAC2,ZWINT,CCT2,CHTF18,TOP1MT,NAP1L5,STAG1,NAP1L3,CCT8,HFM1,RCCD1,SIRT1,ACTR5,HNRNPA2B1,TRIM27,RING1,INO80B,MEI4,DMAP1,PAX7,TRP53,PRKDC,RAD21L,RAD51,PRMT1,HMGN1,H3F3B,HELB,MSL3L2,RTEL1,XPA,APEX1
GO:BP	DNA repair	GO:0006281	0.000128326	3.89168	511	639	34	27543	TWIST1,MORF4L2,SMC4,CDC45,SAMHD1,TAOK3,RRM2B,SUV39H1,TERF2IP,MLH3,ASCC1,RHNO1,GTF2H2,SIRT1,PARP2,EME2,ACTR5,HDAC10,FBXO6,DMAP1,HMCES,TRP53,PRKDC,RAD21L,CCDC117,RAD51,HMGN1,RNF138RT1,TONSL,HELB,RTEL1,XPA,APEX1,FGF10
GO:BP	cell projection organization	GO:0030030	0.0001429	3.84497	1627	639	73	27543	ONECUT2,GDI1,NDN,GAP43,SAMD14,CCDC39,BEX1,DPYSL5,HSP90AA1,EEF1A1,HSP90AB1,RDX,DPYSL3,ACHE,BBS2,RIT2,RHOU,TAOK3,CORO1C,INPP5F,CHL1,VASP,HDAC2,CHRNB2,VDAC3,FUZ,ILK,LHFPL5,CEP120,RSPH9,STMN2,CLRN1,RAPGEF6,TCTN1,FOXB1,TTC12,VAX2,SIRT1,ARPC5,BBS9,SEMA6C,CERS2,ARL6,WTIP,BLOC1S5,DNAH5,FKBP1B,RPGRIP1,UCHL1,DNAH7B,PLCE1,EFNA2,BBS7,LHX4,PLXNA3,RAC3,CEP78,STK36,FLOT1,IFT46,SH3YL1,TEKT1,PRMT1,DGUOK,LHX1,POU4…
GO:BP	pattern specification process	GO:0007389	0.00025667	3.59062	452	639	31	27543	CCDC39,DLX2,DMRT2,RNF2,HOXD8,LBX1,FUZ,BARX1,MED12,EN1,POFUT1,IRX2,TCTN1,FOXB1,IRX3,HOXC4,TBX2,VAX2,PAX3,DNAH5,RING1,MEIS1,HNF1B,PAX7,TRP53,PRKDC,LHX1,ENKUR,CITED2,HOXB2,FGF10
GO:BP	plasma membrane bounded cell projection organization	GO:0120036	0.00025969	3.58554	1589	639	71	27543	ONECUT2,GDI1,NDN,GAP43,SAMD14,CCDC39,BEX1,DPYSL5,HSP90AA1,EEF1A1,HSP90AB1,RDX,DPYSL3,ACHE,BBS2,RIT2,TAOK3,CORO1C,INPP5F,CHL1,VASP,HDAC2,CHRNB2,VDAC3,FUZ,ILK,LHFPL5,CEP120,RSPH9,STMN2,CLRN1,RAPGEF6,TCTN1,FOXB1,TTC12,VAX2,SIRT1,ARPC5,BBS9,SEMA6C,CERS2,ARL6,BLOC1S5,DNAH5,FKBP1B,RPGRIP1,UCHL1,DNAH7B,PLCE1,EFNA2,BBS7,LHX4,PLXNA3,RAC3,CEP78,STK36,FLOT1,IFT46,SH3YL1,TEKT1,PRMT1,DGUOK,LHX1,POU4F2,DACT1,M…
GO:BP	telomere maintenance via telomere lengthening	GO:0010833	0.000536365	3.27054	77	639	12	27543	HSP90AA1,HSP90AB1,CCT3,CCT5,TERF2IP,MAPK3,TELO2,CCT2,CCT8,HNRNPA2B1,RAD51,RTEL1
GO:BP	tissue development	GO:0009888	0.000617309	3.2095	2046	639	84	27543	ONECUT2,TWIST1,PAX2,CCDC39,MAGED1,RDX,STAT6,BBS2,TUFT1,GPI1,STK3,ACADVL,ADAM15,CORO1C,GAA,SUV39H1,DLX2,LTA4H,DMRT2,MAPK3,HDAC1,VASP,SIM1,HDAC2,TPPP3,HSPA8,LBX1,PAF1,SHARPIN,FUZ,ILK,LHFPL5,LATS2,BARX1,MED12,MYL6B,EN1,CLRN1,POFUT1,IRX2,CD109,SRSF6,TCTN1,FOXB1,IRX3,HOXC4,TBX2,PAX3,SIRT1,EFEMP2,SEMA6C,PARP2,DDX5,ZFP64,MYL6,MEIS1,GPNMB,TAZ,GHSR,HNF1B,PAX7,TRP53,MET,PRKDC,ZFP516,MYCL,FLOT1,GJC1,PRMT1,C…
GO:BP	cell differentiation	GO:0030154	0.000913097	3.03948	4646	639	157	27543	ONECUT2,TWIST1,FHL1,LGALS8,GDI1,EN2,NDN,ZFP503,GAP43,TUBB2A,SAMD14,MORF4L2,BEX1,UCMA,DPYSL5,ARXES2,HSP90AA1,EEF1A1,SMARCA1,HSP90AB1,RDX,DPYSL3,ACHE,STAT6,NINJ1,IRX5,BBS2,ZFP157,RIT2,STK3,ACADVL,TAOK3,ADAM15,CORO1C,DLX4,SUV39H1,RAB27A,DLX2,LTA4H,MAPK3,INPP5F,CHL1,RNF2,TRPC4,HDAC1,VASP,NELFB,SIM1,HDAC2,PRDX3,CHRNB2,LBX1,PAF1,SLC25A38,ABCB10,SHARPIN,SETD6,FUZ,ALOXE3,ATAT1,ILK,CEP57,LHFPL5,CEP120,LAT…
GO:BP	embryonic morphogenesis	GO:0048598	0.00117434	2.93021	641	639	37	27543	TWIST1,CCDC39,IRX5,GPI1,STK3,DLX2,MAPK3,RNF2,HDAC1,VASP,LBX1,PAF1,PRKRA,FUZ,LHFPL5,LATS2,MED12,EN1,CLRN1,IRX2,TCTN1,IRX3,HOXC4,TBX2,VAX2,PAX3,BLOC1S5,HNF1B,TRP53,LHX1,SUPT20,DACT1,CITED2,LAMB1,SPINT2,HOXB2,FGF10
GO:BP	cellular developmental process	GO:0048869	0.00140022	2.8538	4678	639	157	27543	ONECUT2,TWIST1,FHL1,LGALS8,GDI1,EN2,NDN,ZFP503,GAP43,TUBB2A,SAMD14,MORF4L2,BEX1,UCMA,DPYSL5,ARXES2,HSP90AA1,EEF1A1,SMARCA1,HSP90AB1,RDX,DPYSL3,ACHE,STAT6,NINJ1,IRX5,BBS2,ZFP157,RIT2,STK3,ACADVL,TAOK3,ADAM15,CORO1C,DLX4,SUV39H1,RAB27A,DLX2,LTA4H,MAPK3,INPP5F,CHL1,RNF2,TRPC4,HDAC1,VASP,NELFB,SIM1,HDAC2,PRDX3,CHRNB2,LBX1,PAF1,SLC25A38,ABCB10,SHARPIN,SETD6,FUZ,ALOXE3,ATAT1,ILK,CEP57,LHFPL5,CEP120,LAT…
GO:BP	organic cyclic compound catabolic process	GO:1901361	0.00143041	2.84454	489	639	31	27543	ACOT7,GSPT2,NT5E,HSD17B11,SAMHD1,MAOA,ACAA1A,MYEF2,LIN28B,DIS3,UPF3B,CYP27A1,SRSF1,CNOT10,AHCY,TAF15,DIS3L,DDX5,NT5C1A,TRAF3IP2,GMPR2,AFMID,NUDT11,DCPS,FAH,DPYD,NUDT12,DNPH1,APEX1,ZC3HAV1,CALCR
GO:BP	cellular component organization or biogenesis	GO:0071840	0.0016074	2.79388	7543	639	231	27543	ONECUT2,FHL1,GDI1,OPTN,NDN,GAP43,CDH18,TUBB2A,TSPYL2,ASH2L,SAMD14,MORF4L2,CCDC39,SMC4,BEX1,COL5A3,DPYSL5,ANAPC5,GSPT2,HSP90AA1,EEF1A1,RAB34,SMARCA1,FAF1,EIF2S3Y,HSP90AB1,CCT3,RDX,DPYSL3,SNCAIP,STIL,SEC24D,ACHE,NINJ1,BBS2,CDC45,RIT2,SAMHD1,MSTO1,TSPYL3,RHOU,STK3,TAOK3,TMEM43,CCT5,CENPC1,ADAM15,CORO1C,RRM2B,VBP1,GAA,SUV39H1,PGRMC1,HAUS4,TPX2,RAB27A,TERF2IP,COX20,MAPK3,TIA1,FCHSD1,INPP5F,CHL1,MLH3,T…
GO:BP	regulation of cellular component organization	GO:0051128	0.00163981	2.78521	2398	639	93	27543	FHL1,GDI1,GAP43,TSPYL2,SMC4,ANAPC5,HSP90AA1,EEF1A1,FAF1,CCT3,RDX,DPYSL3,SNCAIP,STIL,ACHE,RIT2,CCT5,ADAM15,CORO1C,VBP1,PGRMC1,TPX2,TERF2IP,MAPK3,FCHSD1,INPP5F,TUBA1A,VASP,TRO,HDAC2,TPPP3,SPARC,HSPA8,ZWINT,CCT2,CHRNB2,VDAC3,FUZ,MTBP,ATAT1,ILK,TFR2,CEP120,STMN2,ATAD3A,SCFD1,SNX4,CLRN1,CCT8,PPFIA1,IRX3,SYDE1,SIRT1,MPP7,ARPC5,EFEMP2,MIEF2,HTRA2,SEMA6C,FYCO1,CERS2,PARP2,NPHP1,ACTR5,HNRNPA2B1,TRIM27,FKB…
GO:BP	anatomical structure morphogenesis	GO:0009653	0.00178134	2.74925	2781	639	104	27543	ONECUT2,TWIST1,PAX2,LGALS8,GDI1,NDN,GAP43,CDH18,CCDC39,MAGED1,DPYSL5,HSP90AA1,HSP90AB1,RDX,ACHE,STAT6,NINJ1,IRX5,BBS2,ZFP157,RHOU,GPI1,STK3,TAOK3,ADAM15,CORO1C,GAA,DLX2,DMRT2,MAPK3,CHL1,RNF2,HDAC1,VASP,HOXD8,SPARC,CHRNB2,LBX1,PAF1,PRKRA,FUZ,ILK,STRIP1,LHFPL5,LATS2,MED12,SCFD1,EN1,CLRN1,POFUT1,IRX2,CD109,SRSF6,TCTN1,FOXB1,IRX3,HOXC4,TBX2,VAX2,PAX3,SIRT1,EFEMP2,MIEF2,SEMA6C,ARL6,WTIP,BLOC1S5,PERP,R…
GO:BP	localization	GO:0051179	0.00180647	2.74317	6297	639	199	27543	ONECUT2,TWIST1,FHL1,GPRASP1,LGALS8,SLC29A4,GDI1,OPTN,NDN,TUBB2A,DYNC1I1,CCDC39,MAGED1,ARXES2,HSP90AA1,RAB34,RANBP17,FAF1,HSP90AB1,CCT3,GRB10,CD200,RDX,DPYSL3,SNCAIP,STIL,SEC24D,ACHE,NINJ1,BBS2,RRAGB,PODXL2,RIT2,CD99L2,MSTO1,RHOU,GPI1,STK3,BEX4,CCT5,CENPC1,ADAM15,MID2,CORO1C,NRBP1,GAA,PGRMC1,SYNGR3,MAGED2,RAB27A,TERF2IP,PABPN1,MAPK3,TIA1,INPP5F,CHL1,MLH3,TRPC4,HCN3,ABCA8A,SPARC,HSPA8,ZWINT,SLC35F1…
GO:BP	regionalization	GO:0003002	0.00201248	2.69627	349	639	25	27543	DLX2,DMRT2,RNF2,HOXD8,FUZ,BARX1,MED12,EN1,POFUT1,IRX2,TCTN1,FOXB1,IRX3,HOXC4,VAX2,PAX3,RING1,HNF1B,PAX7,TRP53,PRKDC,LHX1,CITED2,HOXB2,FGF10
GO:BP	neuron development	GO:0048666	0.00219851	2.65787	1241	639	57	27543	ONECUT2,GDI1,EN2,NDN,GAP43,SAMD14,BEX1,DPYSL5,HSP90AA1,EEF1A1,HSP90AB1,DPYSL3,ACHE,IRX5,RIT2,TAOK3,INPP5F,CHL1,VASP,HDAC2,CHRNB2,ATAT1,ILK,LHFPL5,STMN2,ZC4H2,EN1,CLRN1,TCTN1,FOXB1,VAX2,SIRT1,HTRA2,SEMA6C,CERS2,BLOC1S5,FKBP1B,RPGRIP1,NHLH2,UCHL1,EFNA2,LHX4,PLXNA3,RAC3,FLOT1,PRMT1,DGUOK,LHX1,POU4F2,NTN4,CTF1,DACT1,CDKL3,LAMB1,TRP73,SNAPIN,CAPRIN2
GO:BP	negative regulation of biosynthetic process	GO:0009890	0.00244652	2.61145	1720	639	72	27543	SFMBT2,TWIST1,PAX2,NDN,ZFP503,NRIP2,MAGED1,SKOR1,EEF1A1,PRMT2,GRB10,STAT6,ZFP157,ACADVL,DLX4,SUV39H1,MAGED2,DLX2,TIA1,RNF2,MYEF2,ZFP955A,HDAC1,TRO,NELFB,HOXD8,HDAC2,HSPA8,2610008E11RIK,HEXIM2,PAF1,ZFP90,ZFP383,ZFP3,CCAR1,EN1,FAM3A,IRX2,CNOT10,IRX3,GSTP1,CTBP2,TBX2,VAX2,PAX3,SIRT1,DNAJC17,WTIP,DDX5,TFAP4,HSPD1,ZFP692,HNRNPA2B1,TRIM27,RING1,AATF,ASXL3,HDAC10,DMAP1,HNF1B,TRP53,NIF3L1,DCPS,CALCA,LHX1…
GO:BP	cellular component organization	GO:0016043	0.00269758	2.56903	7353	639	225	27543	ONECUT2,FHL1,GDI1,OPTN,NDN,GAP43,CDH18,TUBB2A,TSPYL2,ASH2L,SAMD14,MORF4L2,CCDC39,SMC4,BEX1,COL5A3,DPYSL5,ANAPC5,GSPT2,HSP90AA1,EEF1A1,RAB34,SMARCA1,FAF1,EIF2S3Y,HSP90AB1,CCT3,RDX,DPYSL3,SNCAIP,STIL,SEC24D,ACHE,NINJ1,BBS2,CDC45,RIT2,SAMHD1,MSTO1,TSPYL3,RHOU,STK3,TAOK3,TMEM43,CCT5,CENPC1,ADAM15,CORO1C,RRM2B,VBP1,GAA,SUV39H1,PGRMC1,HAUS4,TPX2,RAB27A,TERF2IP,COX20,MAPK3,TIA1,FCHSD1,INPP5F,CHL1,MLH3,T…
GO:BP	telomere organization	GO:0032200	0.00335867	2.47383	143	639	15	27543	HSP90AA1,HSP90AB1,CCT3,CCT5,TERF2IP,MAPK3,TELO2,CCT2,CCT8,HNRNPA2B1,PRKDC,RAD51,H3F3B,RTEL1,APEX1
GO:BP	nucleic acid metabolic process	GO:0090304	0.00347239	2.45937	7815	639	236	27543	ONECUT2,SFMBT2,TWIST1,PAX2,EBF4,EN2,NDN,ZFP503,TSPYL2,ASH2L,NRIP2,ZSCAN18,MORF4L2,SMC4,TFAP2A,MAGED1,SKOR1,GSPT2,WDR6,SRSF5,HSP90AA1,SMARCA1,FAF1,TRMT2B,PRMT2,SOX3,HSP90AB1,CCT3,CD200,ZFP28,ELAC1,NFYA,STAT6,IRX5,SRSF2,ZFP157,CDC45,RIT2,SAMHD1,STK3,ORC3,DUS2,TAOK3,RNF25,CCT5,MID2,CREB3L3,DLX4,RRM2B,SUV39H1,MAGED2,DLX2,PRIM1,TERF2IP,PABPN1,DMRT2,MAPK3,TIA1,MLH3,STAT4,RNF2,TELO2,PHF1,MYEF2,ZFP955A,P…
GO:BP	embryo development	GO:0009790	0.00419377	2.3774	1236	639	56	27543	TWIST1,EN2,CCDC39,UCMA,SEC24D,IRX5,GPI1,STK3,SUV39H1,DLX2,DMRT2,MAPK3,RNF2,HDAC1,VASP,LBX1,PAF1,PRKRA,FUZ,LHFPL5,LATS2,H13,MED12,EN1,CLRN1,POFUT1,SRSF1,IRX2,TCTN1,FOXB1,IRX3,HOXC4,TBX2,VAX2,PAX3,PTPRR,BLOC1S5,MBIP,MEIS1,AATF,HNF1B,PAX7,TRP53,PRKDC,BTF3,PRMT1,LHX1,SUPT20,DACT1,CITED2,RCN1,LAMB1,PKDCC,SPINT2,HOXB2,FGF10
GO:BP	negative regulation of RNA metabolic process	GO:0051253	0.00434553	2.36196	1489	639	64	27543	SFMBT2,TWIST1,PAX2,NDN,ZFP503,NRIP2,MAGED1,SKOR1,PRMT2,STAT6,ZFP157,DLX4,SUV39H1,MAGED2,DLX2,RNF2,MYEF2,ZFP955A,HDAC1,TRO,NELFB,HOXD8,HDAC2,HSPA8,LIN28B,2610008E11RIK,HEXIM2,PAF1,ZFP90,ZFP383,ZFP3,CCAR1,EN1,SRSF1,IRX2,SRSF6,IRX3,TAF15,CTBP2,TBX2,VAX2,PAX3,SIRT1,DNAJC17,WTIP,DDX5,TFAP4,ZFP692,HNRNPA2B1,TRIM27,TRAF3IP2,RING1,HDAC10,DMAP1,HNF1B,TRP53,NIF3L1,CALCA,LHX1,POU4F2,SAP30,DACT1,CITED2,OTP
GO:BP	aromatic compound catabolic process	GO:0019439	0.00439973	2.35657	464	639	29	27543	ACOT7,GSPT2,NT5E,SAMHD1,MAOA,ACAA1A,MYEF2,LIN28B,DIS3,UPF3B,SRSF1,CNOT10,AHCY,TAF15,DIS3L,DDX5,NT5C1A,TRAF3IP2,GMPR2,AFMID,NUDT11,DCPS,FAH,DPYD,NUDT12,DNPH1,APEX1,ZC3HAV1,CALCR
GO:BP	brain development	GO:0007420	0.00457137	2.33995	763	639	40	27543	EN2,PAFAH1B3,CCDC39,SMARCA1,BBS2,DLX2,FPGS,HDAC1,MAST1,HSPA8,CHRNB2,SHARPIN,ATIC,ATAT1,CEP120,EN1,TCTN1,FOXB1,ABCB6,VAX2,HTRA2,ARL6,DNAH5,NHLH2,MEIS1,LHX5,EFNA2,BBS7,HNF1B,TRP53,PLXNA3,PRKDC,RAC3,STK36,LHX1,LAMB1,HOXB2,OTP,TRP73,FGF10
GO:BP	negative regulation of nucleobase-containing compound metabolic process	GO:0045934	0.00458452	2.33871	1620	639	68	27543	SFMBT2,TWIST1,PAX2,NDN,ZFP503,TSPYL2,NRIP2,MAGED1,SKOR1,PRMT2,STAT6,ZFP157,DLX4,SUV39H1,MAGED2,DLX2,TERF2IP,RNF2,MYEF2,ZFP955A,HDAC1,TRO,NELFB,HOXD8,HDAC2,HSPA8,LIN28B,2610008E11RIK,HEXIM2,PAF1,ZFP90,ZFP383,ZFP3,CCAR1,EN1,SRSF1,IRX2,SRSF6,IRX3,TAF15,CTBP2,TBX2,VAX2,PAX3,SIRT1,DNAJC17,WTIP,DDX5,TFAP4,ZFP692,HNRNPA2B1,TRIM27,TRAF3IP2,RING1,HDAC10,DMAP1,HNF1B,TRP53,NIF3L1,CALCA,LHX1,POU4F2,SAP30,HEL…
GO:BP	cell development	GO:0048468	0.00491644	2.30835	2426	639	92	27543	ONECUT2,TWIST1,GDI1,EN2,NDN,GAP43,SAMD14,BEX1,DPYSL5,HSP90AA1,EEF1A1,HSP90AB1,RDX,DPYSL3,ACHE,NINJ1,IRX5,BBS2,RIT2,TAOK3,CORO1C,DLX2,MAPK3,INPP5F,CHL1,RNF2,HDAC1,VASP,HDAC2,CHRNB2,ABCB10,ATAT1,ILK,CEP57,LHFPL5,LATS2,STMN2,MED12,ZC4H2,EN1,CLRN1,IRX2,XLR3A,TCTN1,FOXB1,HFM1,IRX3,GSTP1,TTC12,HOXC4,VAX2,PAX3,SIRT1,EFEMP2,HTRA2,SEMA6C,CERS2,PARP2,CATSPERD,BLOC1S5,FKBP1B,RPGRIP1,NHLH2,MEIS1,UCHL1,MEI4,E…
GO:BP	negative regulation of metabolic process	GO:0009892	0.00498492	2.30234	3558	639	124	27543	SFMBT2,TWIST1,PAX2,OPTN,NDN,ZFP503,TSPYL2,NRIP2,MAGED1,SKOR1,GSPT2,WDR6,EEF1A1,PRMT2,HSP90AB1,GRB10,STAT6,BBS2,ZFP157,GPI1,ACADVL,BEX4,CORO1C,DLX4,VBP1,SUV39H1,MAGED2,DLX2,TERF2IP,TIA1,INPP5F,RNF2,PHF1,MYEF2,ZFP955A,HDAC1,TRO,NELFB,HOXD8,HDAC2,PRDX3,HSPA8,LIN28B,2610008E11RIK,METTL20,HEXIM2,PAF1,ZFP90,PRKRA,ZFP383,ZFP3,ILK,CCAR1,LATS2,UPF3B,SCFD1,EN1,FAM3A,SRSF1,IRX2,CNOT10,CD109,SRSF6,IRX3,GSTP1…
GO:BP	negative regulation of nitrogen compound metabolic process	GO:0051172	0.00577145	2.23871	2539	639	95	27543	SFMBT2,TWIST1,PAX2,NDN,ZFP503,TSPYL2,NRIP2,MAGED1,SKOR1,PRMT2,HSP90AB1,STAT6,ZFP157,GPI1,BEX4,CORO1C,DLX4,VBP1,SUV39H1,MAGED2,DLX2,TERF2IP,TIA1,INPP5F,RNF2,PHF1,MYEF2,ZFP955A,HDAC1,TRO,NELFB,HOXD8,HDAC2,PRDX3,HSPA8,LIN28B,2610008E11RIK,HEXIM2,PAF1,ZFP90,ZFP383,ZFP3,ILK,CCAR1,LATS2,EN1,SRSF1,IRX2,CNOT10,CD109,SRSF6,IRX3,GSTP1,TAF15,CTBP2,TBX2,VAX2,PAX3,SIRT1,DNAJC17,PWP1,WTIP,DDX5,TFAP4,ZFP692,HNR…
GO:BP	negative regulation of macromolecule biosynthetic process	GO:0010558	0.00782582	2.10647	1613	639	67	27543	SFMBT2,TWIST1,PAX2,NDN,ZFP503,NRIP2,MAGED1,SKOR1,PRMT2,GRB10,STAT6,ZFP157,DLX4,SUV39H1,MAGED2,DLX2,TIA1,RNF2,MYEF2,ZFP955A,HDAC1,TRO,NELFB,HOXD8,HDAC2,HSPA8,2610008E11RIK,HEXIM2,PAF1,ZFP90,ZFP383,ZFP3,CCAR1,EN1,IRX2,CNOT10,IRX3,GSTP1,CTBP2,TBX2,VAX2,PAX3,SIRT1,DNAJC17,WTIP,DDX5,TFAP4,ZFP692,HNRNPA2B1,TRIM27,RING1,AATF,HDAC10,DMAP1,HNF1B,TRP53,NIF3L1,DCPS,CALCA,LHX1,POU4F2,SAP30,DACT1,CITED2,PASK,…
GO:BP	protein metabolic process	GO:0019538	0.00868064	2.06145	5623	639	178	27543	TWIST1,ECE2,PAX2,RIMKLB,USP11,PNCK,NDN,TSPYL2,ASH2L,NRIP2,MORF4L2,MAGED1,PSME1,ANAPC5,GSPT2,ARXES2,HSP90AA1,EEF1A1,FKBP14,FAF1,EIF2S3Y,PRMT2,HSP90AB1,RDX,APEH,MACROD1,NFYA,RIT2,GPI1,STK3,PRSS16,HS6ST2,TAOK3,RNF25,BEX4,ADAM15,DPP7,CORO1C,NRBP1,VBP1,SUV39H1,TPX2,LTA4H,TERF2IP,MAPK3,TIA1,INPP5F,STK33,RNF2,TELO2,PHF1,HDAC1,HDAC2,NNMT,METAP1D,MAST1,PRDX3,NAA16,HSPA8,SGSH,METTL20,HEXIM2,PAF1,ABCB10,PRK…
GO:BP	head development	GO:0060322	0.00885161	2.05298	813	639	41	27543	EN2,PAFAH1B3,CCDC39,SMARCA1,BBS2,DLX2,MAPK3,FPGS,HDAC1,MAST1,HSPA8,CHRNB2,SHARPIN,ATIC,ATAT1,CEP120,EN1,TCTN1,FOXB1,ABCB6,VAX2,HTRA2,ARL6,DNAH5,NHLH2,MEIS1,LHX5,EFNA2,BBS7,HNF1B,TRP53,PLXNA3,PRKDC,RAC3,STK36,LHX1,LAMB1,HOXB2,OTP,TRP73,FGF10
GO:BP	animal organ morphogenesis	GO:0009887	0.0090122	2.04517	1082	639	50	27543	TWIST1,PAX2,CCDC39,MAGED1,STAT6,IRX5,BBS2,ZFP157,ADAM15,GAA,DLX2,MAPK3,HDAC1,HOXD8,LBX1,PRKRA,FUZ,ILK,LHFPL5,MED12,CLRN1,IRX2,SRSF6,IRX3,HOXC4,TBX2,VAX2,PAX3,EFEMP2,ARL6,BLOC1S5,PERP,RING1,RPGRIP1,MEIS1,CAPN1,ASXL3,TAZ,HNF1B,PAX7,TRP53,LHX4,HMGN1,LHX1,NTN4,DACT1,CITED2,LAMB1,HOXB2,FGF10
GO:BP	regulation of protein stability	GO:0031647	0.00961634	2.01699	308	639	22	27543	HSP90AA1,HSP90AB1,CCT3,STK3,CCT5,TELO2,NAA16,HSPA8,CCT2,PRKRA,CCT8,SIRT1,PIM2,HSPD1,RNF128,HYPK,TRP53,BAG2,PRKDC,FLOT1,IFT46,DACT1
GO:BP	telomere maintenance	GO:0000723	0.0112151	1.9502	138	639	14	27543	HSP90AA1,HSP90AB1,CCT3,CCT5,TERF2IP,MAPK3,TELO2,CCT2,CCT8,HNRNPA2B1,PRKDC,RAD51,RTEL1,APEX1
GO:BP	negative regulation of nucleic acid-templated transcription	GO:1903507	0.0124823	1.90371	1377	639	59	27543	SFMBT2,TWIST1,PAX2,NDN,ZFP503,NRIP2,MAGED1,SKOR1,PRMT2,STAT6,ZFP157,DLX4,SUV39H1,MAGED2,DLX2,RNF2,MYEF2,ZFP955A,HDAC1,TRO,NELFB,HOXD8,HDAC2,HSPA8,2610008E11RIK,HEXIM2,PAF1,ZFP90,ZFP383,ZFP3,CCAR1,EN1,IRX2,IRX3,CTBP2,TBX2,VAX2,PAX3,SIRT1,DNAJC17,WTIP,DDX5,TFAP4,ZFP692,HNRNPA2B1,TRIM27,RING1,HDAC10,DMAP1,HNF1B,TRP53,NIF3L1,CALCA,LHX1,POU4F2,SAP30,DACT1,CITED2,OTP
GO:BP	negative regulation of RNA biosynthetic process	GO:1902679	0.0127611	1.89411	1378	639	59	27543	SFMBT2,TWIST1,PAX2,NDN,ZFP503,NRIP2,MAGED1,SKOR1,PRMT2,STAT6,ZFP157,DLX4,SUV39H1,MAGED2,DLX2,RNF2,MYEF2,ZFP955A,HDAC1,TRO,NELFB,HOXD8,HDAC2,HSPA8,2610008E11RIK,HEXIM2,PAF1,ZFP90,ZFP383,ZFP3,CCAR1,EN1,IRX2,IRX3,CTBP2,TBX2,VAX2,PAX3,SIRT1,DNAJC17,WTIP,DDX5,TFAP4,ZFP692,HNRNPA2B1,TRIM27,RING1,HDAC10,DMAP1,HNF1B,TRP53,NIF3L1,CALCA,LHX1,POU4F2,SAP30,DACT1,CITED2,OTP
GO:BP	fatty acid oxidation	GO:0019395	0.0130334	1.88494	121	639	13	27543	TWIST1,ACADVL,ACAA1A,METTL20,ECHDC2,C1QTNF2,CYP4V3,CPT1C,ABCD4,NUCB2,ILVBL,PLIN5,ECH1
GO:BP	cellular nitrogen compound catabolic process	GO:0044270	0.0140057	1.8537	440	639	27	27543	ACOT7,GSPT2,NT5E,SAMHD1,MYEF2,LIN28B,DIS3,UPF3B,SRSF1,CNOT10,AHCY,TAF15,DIS3L,DDX5,NT5C1A,TRAF3IP2,GMPR2,AFMID,NUDT11,DMGDH,DCPS,DPYD,NUDT12,DNPH1,APEX1,ZC3HAV1,CALCR
GO:BP	negative regulation of cellular biosynthetic process	GO:0031327	0.0147425	1.83143	1677	639	68	27543	SFMBT2,TWIST1,PAX2,NDN,ZFP503,NRIP2,MAGED1,SKOR1,PRMT2,GRB10,STAT6,ZFP157,ACADVL,DLX4,SUV39H1,MAGED2,DLX2,TIA1,RNF2,MYEF2,ZFP955A,HDAC1,TRO,NELFB,HOXD8,HDAC2,HSPA8,2610008E11RIK,HEXIM2,PAF1,ZFP90,ZFP383,ZFP3,CCAR1,EN1,FAM3A,IRX2,CNOT10,IRX3,CTBP2,TBX2,VAX2,PAX3,SIRT1,DNAJC17,WTIP,DDX5,TFAP4,ZFP692,HNRNPA2B1,TRIM27,RING1,AATF,HDAC10,DMAP1,HNF1B,TRP53,NIF3L1,DCPS,CALCA,LHX1,POU4F2,SAP30,DACT1,CITED…
GO:BP	macromolecule modification	GO:0043412	0.0155915	1.80711	3898	639	131	27543	TWIST1,RIMKLB,USP11,PNCK,NDN,TSPYL2,ASH2L,MORF4L2,MAGED1,ANAPC5,WDR6,HSP90AA1,FKBP14,TRMT2B,PRMT2,HSP90AB1,MACROD1,NFYA,RIT2,STK3,DUS2,TAOK3,RNF25,BEX4,CORO1C,NRBP1,SUV39H1,TPX2,TERF2IP,MAPK3,INPP5F,STK33,RNF2,TELO2,PHF1,HDAC1,HDAC2,NNMT,METAP1D,MAST1,PRDX3,NAA16,HSPA8,METTL20,HEXIM2,PAF1,PRKRA,SHARPIN,SETD6,MTBP,ELP4,ATAT1,ILK,ARRDC1,LATS2,MED12,ZC4H2,POFUT1,ATG16L2,CD109,GSTP1,DZIP3,SIRT1,PTPRR…
GO:BP	protein deacetylation	GO:0006476	0.0156372	1.80584	123	639	13	27543	NDN,MORF4L2,BEX4,SUV39H1,HDAC1,HDAC2,NNMT,SIRT1,SIRT5,MBIP,HDAC10,TRP53,MSL3L2
GO:BP	purine-containing compound catabolic process	GO:0072523	0.0161394	1.79211	57	639	9	27543	ACOT7,NT5E,SAMHD1,AHCY,NT5C1A,GMPR2,NUDT11,DPYD,DNPH1
GO:BP	regulation of DNA metabolic process	GO:0051052	0.0167719	1.77542	497	639	29	27543	TWIST1,TSPYL2,MORF4L2,HSP90AA1,FAF1,HSP90AB1,CCT3,STAT6,ORC3,CCT5,SUV39H1,TERF2IP,MAPK3,CCT2,CHTF18,CCT8,SIRT1,ACTR5,HNRNPA2B1,HDAC10,DMAP1,HMCES,TRP53,PRKDC,CCDC117,RAD51,HELB,RTEL1,FGF10
GO:BP	cell cycle G1/S phase transition	GO:0044843	0.0175599	1.75548	227	639	18	27543	FHL1,PSME1,RDX,STIL,RHOU,HSPA8,PAF1,MTBP,PSME2,LATS2,TBX2,PIM2,GPNMB,TRP53,PRKDC,DACT1,APEX1,FGF10
GO:BP	positive regulation of DNA metabolic process	GO:0051054	0.0195963	1.70783	298	639	21	27543	MORF4L2,HSP90AA1,FAF1,HSP90AB1,CCT3,STAT6,CCT5,MAPK3,CCT2,CHTF18,CCT8,SIRT1,HNRNPA2B1,HDAC10,DMAP1,HMCES,PRKDC,CCDC117,RAD51,RTEL1,FGF10
GO:BP	regulation of cellular catabolic process	GO:0031329	0.0210649	1.67644	784	639	39	27543	TWIST1,OPTN,PSME1,WDR6,HSP90AA1,FAF1,HSP90AB1,RDX,WDR41,RRAGB,MID2,MAPK3,MYEF2,LIN28B,METTL20,BCAP31,PSME2,SCFD1,SNX4,SRSF1,TAF15,SIRT1,FYCO1,TRIM27,TRAF3IP2,PLIN5,BBS7,ARAF,TRP53,BAG2,HFE,DCPS,RNF31,NQO1,DACT1,XPA,APEX1,ZC3HAV1,CALCR
GO:BP	positive regulation of cellular component organization	GO:0051130	0.0219214	1.65913	1149	639	51	27543	GDI1,SMC4,ANAPC5,HSP90AA1,EEF1A1,FAF1,CCT3,DPYSL3,STIL,ACHE,RIT2,CCT5,CORO1C,MAPK3,FCHSD1,VASP,TPPP3,CCT2,FUZ,ATAT1,ILK,TFR2,CEP120,STMN2,SNX4,CLRN1,CCT8,IRX3,SIRT1,MPP7,EFEMP2,MIEF2,HTRA2,FYCO1,NPHP1,HNRNPA2B1,TRIM27,FKBP1B,PLCE1,VPS28,TRP53,PLXNA3,MET,HFE,FLOT1,CD151,POU4F2,MSTN,CDKL3,RTEL1,CAPRIN2
GO:BP	cell cycle	GO:0007049	0.0232534	1.63351	1767	639	70	27543	FHL1,ZFP503,TUBB2A,TSPYL2,MORF4L2,SMC4,PSME1,ANAPC5,GSPT2,WDR6,SRSF5,HSP90AB1,RDX,STIL,SRSF2,CDC45,RHOU,TAOK3,BEX4,CENPC1,RRM2B,SUV39H1,HAUS4,TPX2,MAPK3,TTC28,STK33,MLH3,RNF2,TUBA1A,KIZ,HSPA8,ZWINT,CCNDBP1,HEXIM2,PAF1,MTBP,ILK,CCAR1,CEP120,PSME2,LATS2,STAG1,XLR3A,HFM1,RHNO1,TBX2,SIRT1,PIM2,EME2,TFAP4,ACTR5,MBIP,GPNMB,AATF,MEI4,DMAP1,TRP53,PRKDC,RAD21L,RAD51,FBXL6,BEX2,DACT1,CITED2,CDKL3,RTEL1,APE…
GO:BP	regulation of growth	GO:0040008	0.0236799	1.62562	701	639	36	27543	FHL1,GDI1,NDN,GAP43,TSPYL2,MORF4L2,BBS2,STK3,ADAM15,SUV39H1,TRO,ILK,LATS2,ATAD3A,TBX2,SIRT1,HTRA2,SEMA6C,PARP2,MEIS1,DMAP1,GHSR,HNF1B,GNG4,TRP53,PLXNA3,PRKDC,H3F3B,POU4F2,CITED2,DNPH1,MSTN,CDKL3,ENOX2,TRP73,CAPRIN2
GO:BP	negative regulation of transcription, DNA-templated	GO:0045892	0.0239889	1.61999	1375	639	58	27543	SFMBT2,TWIST1,PAX2,NDN,ZFP503,NRIP2,MAGED1,SKOR1,PRMT2,STAT6,ZFP157,DLX4,SUV39H1,MAGED2,DLX2,RNF2,MYEF2,ZFP955A,HDAC1,TRO,NELFB,HOXD8,HDAC2,HSPA8,2610008E11RIK,HEXIM2,PAF1,ZFP90,ZFP383,ZFP3,CCAR1,EN1,IRX2,IRX3,CTBP2,TBX2,VAX2,PAX3,SIRT1,DNAJC17,WTIP,DDX5,TFAP4,ZFP692,HNRNPA2B1,TRIM27,RING1,HDAC10,DMAP1,HNF1B,TRP53,CALCA,LHX1,POU4F2,SAP30,DACT1,CITED2,OTP
GO:BP	lipid oxidation	GO:0034440	0.0242556	1.61519	128	639	13	27543	TWIST1,ACADVL,ACAA1A,METTL20,ECHDC2,C1QTNF2,CYP4V3,CPT1C,ABCD4,NUCB2,ILVBL,PLIN5,ECH1
GO:BP	mitotic cell cycle	GO:0000278	0.0257222	1.58969	850	639	41	27543	FHL1,TUBB2A,SMC4,PSME1,ANAPC5,RDX,STIL,SRSF2,CDC45,RHOU,TAOK3,BEX4,CENPC1,RRM2B,TPX2,TTC28,STK33,RNF2,TUBA1A,HSPA8,ZWINT,MTBP,PSME2,LATS2,STAG1,SIRT1,PIM2,EME2,TFAP4,GPNMB,AATF,TRP53,PRKDC,RAD21L,RAD51,FBXL6,DACT1,RTEL1,APEX1,TRP73,FGF10
GO:BP	negative regulation of transcription by RNA polymerase II	GO:0000122	0.0261172	1.58307	971	639	45	27543	TWIST1,NDN,NRIP2,MAGED1,SKOR1,STAT6,ZFP157,DLX4,SUV39H1,MAGED2,DLX2,RNF2,MYEF2,ZFP955A,HDAC1,TRO,HOXD8,HDAC2,2610008E11RIK,HEXIM2,PAF1,ZFP90,ZFP383,ZFP3,EN1,IRX2,IRX3,TBX2,VAX2,PAX3,SIRT1,DNAJC17,DDX5,ZFP692,HNRNPA2B1,TRIM27,HDAC10,DMAP1,HNF1B,TRP53,POU4F2,SAP30,DACT1,CITED2,OTP
GO:BP	cell projection assembly	GO:0030031	0.0286882	1.5423	566	639	31	27543	ONECUT2,GAP43,CCDC39,HSP90AA1,RDX,DPYSL3,BBS2,RHOU,CORO1C,VDAC3,FUZ,CEP120,RSPH9,CLRN1,RAPGEF6,TCTN1,TTC12,BBS9,ARL6,DNAH5,RPGRIP1,DNAH7B,PLCE1,BBS7,RAC3,STK36,IFT46,SH3YL1,TEKT1,MSTN,RSPH4A
GO:BP	protein stabilization	GO:0050821	0.0303962	1.51718	192	639	16	27543	HSP90AA1,HSP90AB1,CCT3,STK3,CCT5,TELO2,NAA16,CCT2,PRKRA,CCT8,PIM2,HSPD1,HYPK,TRP53,BAG2,FLOT1
GO:BP	anterior/posterior pattern specification	GO:0009952	0.0307253	1.5125	214	639	17	27543	DMRT2,RNF2,HOXD8,FUZ,BARX1,MED12,EN1,POFUT1,FOXB1,HOXC4,PAX3,RING1,HNF1B,TRP53,PRKDC,LHX1,HOXB2
GO:BP	histone modification	GO:0016570	0.0316608	1.49948	514	639	29	27543	TWIST1,ASH2L,MORF4L2,PRMT2,NFYA,SUV39H1,MAPK3,RNF2,PHF1,HDAC1,HDAC2,NNMT,PAF1,SETD6,SIRT1,PARP2,PWP1,RING1,MBIP,HDAC10,DMAP1,PAX7,TRP53,CRTC2,FBL,PRMT1,H3F3B,SUPT20,MSL3L2
GO:BP	central nervous system neuron differentiation	GO:0021953	0.0324453	1.48885	193	639	16	27543	HSP90AA1,HSP90AB1,DLX2,CHRNB2,LBX1,ZC4H2,TCTN1,PAX3,NHLH2,LHX5,PAX7,LHX4,PLXNA3,RAC3,LHX1,OTP
GO:BP	cardiac muscle cell apoptotic process	GO:0010659	0.0328317	1.48371	62	639	9	27543	HSP90AA1,HSPA8,ILK,SIRT1,SIRT5,CAPN1,TRP53,POU4F2,ACOT1
GO:BP	nucleobase-containing compound catabolic process	GO:0034655	0.0331404	1.47964	409	639	25	27543	ACOT7,GSPT2,NT5E,SAMHD1,MYEF2,LIN28B,DIS3,UPF3B,SRSF1,CNOT10,AHCY,TAF15,DIS3L,DDX5,NT5C1A,TRAF3IP2,GMPR2,NUDT11,DCPS,DPYD,NUDT12,DNPH1,APEX1,ZC3HAV1,CALCR
GO:BP	DNA recombination	GO:0006310	0.0356915	1.44744	310	639	21	27543	MORF4L2,STAT6,CDC45,SAMHD1,TERF2IP,HFM1,RHNO1,EME2,HSPD1,MEI4,HDAC10,DMAP1,HMCES,PRKDC,RAD21L,RAD51,RNF138RT1,TONSL,HELB,RTEL1,APEX1
GO:BP	phosphorus metabolic process	GO:0006793	0.0359375	1.44445	2797	639	99	27543	TWIST1,PNCK,TSPYL2,ACOT7,DGKA,MAGED1,HSP90AA1,EEF1A1,HSP90AB1,GRB10,PRPS1L3,NT5E,RIT2,SAMHD1,GPI1,STK3,TAOK3,NAGK,UCKL1,CORO1C,NRBP1,RRM2B,TPX2,TERF2IP,MAPK3,INPP5F,STK33,TELO2,PRPSAP1,ABCA8A,HDAC2,MAST1,PRDX3,HSPA8,AGPAT4,HEXIM2,PRKRA,ATIC,ILK,LATS2,TMEM150A,CD109,PGD,GSTP1,MCCC2,PRPSAP2,SIRT1,PTPRR,RPS6KA6,PIM2,PWP1,TFAP4,NT5C1A,TRIM27,FKBP1B,GPAA1,GMPR2,GPNMB,UCHL1,PLCE1,TEC,CTPS2,TAZ,PRPS1,AR…
GO:BP	protein deacylation	GO:0035601	0.0368108	1.43402	133	639	13	27543	NDN,MORF4L2,BEX4,SUV39H1,HDAC1,HDAC2,NNMT,SIRT1,SIRT5,MBIP,HDAC10,TRP53,MSL3L2
GO:BP	heterocycle catabolic process	GO:0046700	0.0387223	1.41204	439	639	26	27543	ACOT7,GSPT2,NT5E,SAMHD1,MYEF2,LIN28B,DIS3,UPF3B,SRSF1,CNOT10,AHCY,TAF15,DIS3L,DDX5,NT5C1A,TRAF3IP2,GMPR2,AFMID,NUDT11,DCPS,DPYD,NUDT12,DNPH1,APEX1,ZC3HAV1,CALCR
GO:BP	cellular localization	GO:0051641	0.0399306	1.39869	2840	639	100	27543	GPRASP1,SLC29A4,GDI1,OPTN,DYNC1I1,CCDC39,MAGED1,ARXES2,HSP90AA1,RAB34,RANBP17,HSP90AB1,CCT3,RDX,SNCAIP,STIL,SEC24D,BBS2,RRAGB,RIT2,MSTO1,STK3,CCT5,CENPC1,MID2,CORO1C,NRBP1,GAA,PGRMC1,RAB27A,TERF2IP,PABPN1,MAPK3,TIA1,INPP5F,HSPA8,ZWINT,CCT2,CHRNB2,PAF1,BCAP31,MTBP,HOOK2,TFR2,CEP120,LATS2,H13,CNPY4,SCFD1,SNX4,TMEM150A,SRSF1,RAPGEF6,CCT8,TCTN1,PPFIA1,SNX32,CTBP2,SIRT1,ERGIC3,BBS9,ABCD4,MIEF2,POLA2,F…
GO:BP	response to stress	GO:0006950	0.0432512	1.364	3942	639	130	27543	TWIST1,LGALS8,OPTN,GAP43,ASH2L,MORF4L2,SMC4,TBKBP1,BEX1,SRSF5,HSP90AA1,TMEM117,FAF1,HSP90AB1,DPYSL3,MACROD1,NT5E,STAT6,NINJ1,RRAGB,CDC45,SAMHD1,GPI1,STK3,ACADVL,TAOK3,ADAM15,MID2,CREB3L3,RRM2B,SUV39H1,RAB27A,TERF2IP,MAPK3,INPP5F,CHL1,STK33,MLH3,PHF1,MYEF2,HDAC2,PRDX3,AIFM2,HSPA8,CHRNB2,ABCB10,PRKRA,SHARPIN,VDAC3,SETD6,BCAP31,ASCC1,TFR2,H13,ATAD3A,UPF3B,SCFD1,SNX4,FAM3A,CD109,SRSF6,RHNO1,GSTP1,AHC…
GO:BP	carboxylic acid catabolic process	GO:0046395	0.0445197	1.35145	243	639	18	27543	TWIST1,ACOT7,ACADVL,NAGK,ACAA1A,METTL20,ECHDC2,CPT1C,PGD,AHCY,MCCC2,ABCD4,ILVBL,PLIN5,ECH1,AFMID,PIPOX,FAH
GO:BP	G1/S transition of mitotic cell cycle	GO:0000082	0.0446513	1.35017	198	639	16	27543	FHL1,PSME1,RDX,STIL,RHOU,HSPA8,MTBP,PSME2,LATS2,PIM2,GPNMB,TRP53,PRKDC,DACT1,APEX1,FGF10
GO:BP	phosphate-containing compound metabolic process	GO:0006796	0.0450966	1.34586	2777	639	98	27543	TWIST1,PNCK,TSPYL2,ACOT7,DGKA,MAGED1,HSP90AA1,EEF1A1,HSP90AB1,GRB10,PRPS1L3,NT5E,RIT2,SAMHD1,GPI1,STK3,TAOK3,NAGK,UCKL1,CORO1C,NRBP1,RRM2B,TPX2,TERF2IP,MAPK3,INPP5F,STK33,TELO2,PRPSAP1,ABCA8A,HDAC2,MAST1,PRDX3,HSPA8,AGPAT4,HEXIM2,PRKRA,ATIC,ILK,LATS2,TMEM150A,CD109,PGD,GSTP1,MCCC2,PRPSAP2,SIRT1,PTPRR,RPS6KA6,PIM2,PWP1,TFAP4,NT5C1A,TRIM27,FKBP1B,GPAA1,GMPR2,GPNMB,UCHL1,PLCE1,TEC,CTPS2,TAZ,PRPS1,AR…
GO:BP	striated muscle cell apoptotic process	GO:0010658	0.0486371	1.31303	65	639	9	27543	HSP90AA1,HSPA8,ILK,SIRT1,SIRT5,CAPN1,TRP53,POU4F2,ACOT1
GO:BP	organic acid catabolic process	GO:0016054	0.0497046	1.3036	245	639	18	27543	TWIST1,ACOT7,ACADVL,NAGK,ACAA1A,METTL20,ECHDC2,CPT1C,PGD,AHCY,MCCC2,ABCD4,ILVBL,PLIN5,ECH1,AFMID,PIPOX,FAH
GO:CC	intracellular anatomical structure	GO:0005622	1.55814e-35	34.8074	17357	640	551	27317	ONECUT2,SFMBT2,TWIST1,FHL1,ECE2,GPRASP1,PAX2,LGALS8,GPRASP2,RIMKLB,USP11,ASL,RGS13,EMID1,EBF4,PNCK,GDI1,EN2,OPTN,NDN,ZFP503,PNMA3,GAP43,TUBB2A,TSPYL2,ASH2L,KLHL4,ZCCHC18,ACOT7,NRIP2,DYNC1I1,ZSCAN18,SAMD14,PAFAH1B3,MORF4L2,CCDC39,DGKA,SMC4,TFAP2A,TBKBP1,BEX1,UCMA,MAGED1,PSME1,SCAPER,SKOR1,DPYSL5,ANAPC5,GSPT2,WDR6,SKAP2,ARXES2,SRSF5,HSP90AA1,EEF1A1,RAB34,TMEM117,RANBP17,FKBP14,SMARCA1,FAF1,EIF2S3Y,…
GO:CC	cytoplasm	GO:0005737	3.26039e-32	31.4867	11416	640	420	27317	SFMBT2,FHL1,ECE2,GPRASP1,PAX2,LGALS8,GPRASP2,RIMKLB,USP11,ASL,RGS13,EMID1,PNCK,GDI1,OPTN,NDN,GAP43,TUBB2A,TSPYL2,ACOT7,NRIP2,DYNC1I1,SAMD14,PAFAH1B3,CCDC39,DGKA,SMC4,TBKBP1,BEX1,UCMA,MAGED1,PSME1,SCAPER,DPYSL5,ANAPC5,GSPT2,WDR6,SKAP2,ARXES2,SRSF5,HSP90AA1,EEF1A1,RAB34,TMEM117,RANBP17,FKBP14,FAF1,EIF2S3Y,TRMT2B,PRMT2,HSP90AB1,HSDL1,CCT3,GRB10,RDX,DPYSL3,APEH,SNCAIP,ELAC1,STIL,SAT2,MMAB,MACROD1,SEC…
GO:CC	organelle	GO:0043226	1.59461e-29	28.7973	16079	640	515	27317	ONECUT2,SFMBT2,TWIST1,FHL1,ECE2,GPRASP1,PAX2,LGALS8,GPRASP2,USP11,ASL,RGS13,EMID1,EBF4,PNCK,GDI1,EN2,OPTN,NDN,ZFP503,PNMA3,GAP43,TUBB2A,TSPYL2,ASH2L,KLHL4,ZCCHC18,ACOT7,NRIP2,DYNC1I1,ZSCAN18,SAMD14,MORF4L2,CCDC39,SMC4,TFAP2A,BEX1,UCMA,MAGED1,PSME1,SCAPER,SKOR1,ANAPC5,WDR6,SKAP2,ARXES2,SRSF5,HSP90AA1,EEF1A1,RAB34,TMEM117,RANBP17,FKBP14,SMARCA1,FAF1,TRMT2B,PRMT2,SOX3,HSP90AB1,HSDL1,CCT3,RDX,DPYSL3,…
GO:CC	intracellular organelle	GO:0043229	2.11134e-28	27.6754	15751	640	506	27317	ONECUT2,SFMBT2,TWIST1,FHL1,ECE2,GPRASP1,PAX2,LGALS8,GPRASP2,USP11,ASL,RGS13,EMID1,EBF4,PNCK,GDI1,EN2,OPTN,NDN,ZFP503,PNMA3,TUBB2A,TSPYL2,ASH2L,KLHL4,ZCCHC18,ACOT7,NRIP2,DYNC1I1,ZSCAN18,SAMD14,MORF4L2,CCDC39,SMC4,TFAP2A,BEX1,UCMA,MAGED1,PSME1,SCAPER,SKOR1,ANAPC5,WDR6,SKAP2,ARXES2,SRSF5,HSP90AA1,EEF1A1,RAB34,TMEM117,RANBP17,FKBP14,SMARCA1,FAF1,TRMT2B,PRMT2,SOX3,HSP90AB1,HSDL1,CCT3,RDX,DPYSL3,ZFP28,…
GO:CC	membrane-bounded organelle	GO:0043227	1.05002e-23	22.9788	14886	640	477	27317	ONECUT2,SFMBT2,TWIST1,FHL1,ECE2,GPRASP1,PAX2,LGALS8,GPRASP2,USP11,ASL,RGS13,EMID1,EBF4,PNCK,GDI1,EN2,OPTN,NDN,ZFP503,PNMA3,TSPYL2,ASH2L,ZCCHC18,ACOT7,NRIP2,DYNC1I1,ZSCAN18,MORF4L2,CCDC39,SMC4,TFAP2A,BEX1,UCMA,MAGED1,PSME1,SCAPER,SKOR1,ANAPC5,WDR6,SKAP2,ARXES2,SRSF5,HSP90AA1,EEF1A1,RAB34,TMEM117,RANBP17,FKBP14,SMARCA1,FAF1,TRMT2B,PRMT2,SOX3,HSP90AB1,HSDL1,DPYSL3,ZFP28,APEH,SNCAIP,ELAC1,MMAB,MACROD…
GO:CC	cellular anatomical entity	GO:0110165	1.1392e-20	19.9434	22745	640	613	27317	ONECUT2,SFMBT2,TWIST1,FHL1,ECE2,GPRASP1,PAX2,LGALS8,GPRASP2,RIMKLB,USP11,ASL,RGS13,SLC29A4,EMID1,EBF4,PNCK,GDI1,EN2,OPTN,NDN,ZFP503,PNMA3,GAP43,CDH18,TUBB2A,TSPYL2,ASH2L,KLHL4,ZCCHC18,ACOT7,NRIP2,DYNC1I1,ZSCAN18,SAMD14,PAFAH1B3,MORF4L2,CCDC39,DGKA,ARL10,SMC4,TFAP2A,TBKBP1,BEX1,UCMA,MAGED1,PSME1,SCAPER,COL5A3,SKOR1,DPYSL5,ANAPC5,GSPT2,WDR6,SKAP2,ARXES2,SRSF5,HSP90AA1,EEF1A1,RAB34,TMEM117,RANBP17,F…
GO:CC	intracellular membrane-bounded organelle	GO:0043231	6.22421e-20	19.2059	14421	640	457	27317	ONECUT2,SFMBT2,TWIST1,FHL1,ECE2,GPRASP1,PAX2,LGALS8,GPRASP2,USP11,ASL,RGS13,EMID1,EBF4,PNCK,GDI1,EN2,OPTN,NDN,ZFP503,PNMA3,TSPYL2,ASH2L,ZCCHC18,ACOT7,NRIP2,DYNC1I1,ZSCAN18,MORF4L2,SMC4,TFAP2A,BEX1,UCMA,MAGED1,PSME1,SCAPER,SKOR1,ANAPC5,WDR6,SKAP2,ARXES2,SRSF5,HSP90AA1,EEF1A1,RAB34,TMEM117,RANBP17,FKBP14,SMARCA1,FAF1,TRMT2B,PRMT2,SOX3,HSP90AB1,HSDL1,DPYSL3,ZFP28,APEH,SNCAIP,ELAC1,MMAB,MACROD1,ZMAT1…
GO:CC	nucleoplasm	GO:0005654	6.93045e-13	12.1592	3844	640	165	27317	ONECUT2,SFMBT2,TWIST1,PAX2,GPRASP2,USP11,EN2,NDN,ASH2L,ACOT7,MORF4L2,SMC4,TFAP2A,PSME1,SCAPER,SKAP2,SRSF5,SMARCA1,FAF1,PRMT2,SOX3,SNCAIP,ELAC1,MACROD1,NFYA,NT5E,STAT6,SRSF2,CDC45,RIT2,PRR13,SAMHD1,GPI1,ORC3,ACADVL,BEX4,CENPC1,CREB3L3,DLX4,RRM2B,SUV39H1,TPX2,MAGED2,LTA4H,TERF2IP,MRI1,PABPN1,MAPK3,TIA1,9930104L06RIK,MLH3,RNF2,TELO2,PHF1,HDAC1,NELFB,HDAC2,CKAP4,ZWINT,LIN28B,CCNDBP1,PRUNE2,HEXIM2,PAF…
GO:CC	cytosol	GO:0005829	3.27747e-11	10.4845	4082	640	167	27317	SFMBT2,FHL1,GPRASP1,LGALS8,GPRASP2,USP11,ASL,RGS13,OPTN,NDN,ACOT7,PAFAH1B3,CCDC39,DGKA,SMC4,MAGED1,SCAPER,GSPT2,WDR6,SKAP2,SRSF5,HSP90AA1,EEF1A1,FAF1,PRMT2,HSP90AB1,CCT3,GRB10,RDX,DPYSL3,APEH,ELAC1,SEC24D,NT5E,STAT6,SRSF2,RIT2,PRR13,MSTO1,GPI1,DUS2,RNF25,BEX4,MAOA,CCT5,DPP7,CREB3L3,RRM2B,VBP1,GGACT,MAGED2,LTA4H,AHSA2,TERF2IP,MRI1,MAPK3,TIA1,9930104L06RIK,TELO2,FPGS,HDAC1,VASP,NELFB,NNMT,PRDX3,AIF…
GO:CC	nucleus	GO:0005634	7.31601e-09	8.13573	10135	640	319	27317	ONECUT2,SFMBT2,TWIST1,FHL1,GPRASP1,PAX2,GPRASP2,USP11,ASL,RGS13,EBF4,PNCK,EN2,OPTN,NDN,ZFP503,PNMA3,TSPYL2,ASH2L,ZCCHC18,ACOT7,NRIP2,DYNC1I1,ZSCAN18,MORF4L2,SMC4,TFAP2A,BEX1,MAGED1,PSME1,SCAPER,SKOR1,ANAPC5,WDR6,SKAP2,SRSF5,HSP90AA1,EEF1A1,RANBP17,SMARCA1,FAF1,PRMT2,SOX3,HSP90AB1,ZFP28,APEH,SNCAIP,ELAC1,MACROD1,ZMAT1,ACHE,NFYA,NT5E,STAT6,IRX5,SRSF2,RRAGB,CDC45,RIT2,PRR13,SAMHD1,TSPYL3,GPI1,STK3,O…
GO:CC	cytoskeleton	GO:0005856	1.55427e-07	6.80847	2321	640	102	27317	ONECUT2,PAX2,NDN,TUBB2A,KLHL4,DYNC1I1,SAMD14,CCDC39,UCMA,ANAPC5,EEF1A1,HSDL1,CCT3,RDX,DPYSL3,STIL,BBS2,CDC45,RHOU,BEX4,CCT5,MID2,CORO1C,HAUS4,TPX2,MAPK3,TTC28,FCHSD1,TUBA1A,PHF1,TRPC4,VASP,TPPP3,MAST1,KIZ,HSPA8,CKAP4,CCT2,SYNC,FUZ,HOOK2,ATAT1,ILK,CEP57,RMDN2,MTSS1,CEP120,RSPH9,LATS2,UPF3B,FRMD3,MYL6B,SNX4,CLRN1,STAG1,RAPGEF6,CCT8,TCTN1,TTC12,ARPC5,BBS9,HTRA2,TMUB1,ARL6,LCA5,DIS3L,CIB2,DNAH5,IQCD,…
GO:CC	chromosome	GO:0005694	4.26928e-07	6.36965	1323	640	68	27317	USP11,TSPYL2,ASH2L,DYNC1I1,MORF4L2,SMC4,MAGED1,SMARCA1,STAT6,SRSF2,CDC45,SAMHD1,TSPYL3,ORC3,CENPC1,SUV39H1,PRIM1,TERF2IP,MLH3,RNF2,TELO2,PHF1,HDAC1,HDAC2,ZWINT,PAF1,SETD6,CHTF18,MTBP,TOP1MT,NAP1L5,STAG1,XLR3A,NAP1L3,RHNO1,RCCD1,SIRT1,ARPC5,HTRA2,POLA2,PARP2,PWP1,ZFP692,NOL7,ACTR5,HNRNPA2B1,RING1,NHLH2,INO80B,MEI4,DMAP1,HMCES,TRP53,RAD21L,MYCL,RAD51,FBL,HMGN1,H3F3B,RNF138RT1,POU4F2,TONSL,SAP30,HEL…
GO:CC	mitochondrion	GO:0005739	8.54655e-06	5.06821	1921	640	84	27317	ASL,ACOT7,HSP90AA1,TRMT2B,HSP90AB1,HSDL1,MMAB,MACROD1,ARMCX4,MSTO1,CYB5R1,ACADVL,DUS2,MAOA,RRM2B,PGRMC1,COX20,MAPK3,ACAA1A,FPGS,NELFB,METAP1D,PRDX3,AIFM2,AGPAT4,METTL20,ECHDC2,SLC25A38,ABCB10,TCAIM,TATDN3,VDAC3,BCAP31,ATIC,TOP1MT,RMDN2,ATAD3A,CYP27A1,CPT1C,PPOX,COQ6,GSTP1,ABCB6,MCCC2,SIRT1,LETM2,MIEF2,SIRT5,HARS,HARS2,HTRA2,RPS6KA6,ME2,TFAP4,HSPD1,PCBD2,NOL7,PERP,GPAA1,PLIN5,SLC35B3,CAPN1,ECH1,CT…
GO:CC	microtubule cytoskeleton	GO:0015630	1.86999e-05	4.72816	1335	640	64	27317	PAX2,NDN,TUBB2A,KLHL4,DYNC1I1,ANAPC5,CCT3,STIL,BBS2,CDC45,BEX4,CCT5,MID2,HAUS4,TPX2,TTC28,TUBA1A,PHF1,TPPP3,KIZ,HSPA8,CCT2,HOOK2,ATAT1,CEP57,RMDN2,CEP120,LATS2,UPF3B,SNX4,CLRN1,STAG1,RAPGEF6,CCT8,TTC12,BBS9,TMUB1,ARL6,LCA5,DIS3L,DNAH5,IQCD,GPAA1,DNAH7B,HYPK,BBS7,TRP53,BAG2,CCDC117,RAD51,CEP78,FLOT1,IFT46,TEKT1,LRRC45,SLC18A2,TCEA2,PTPN20,TMEM9,KIF6,APEX1,SNAPIN,CAPRIN2,TAF1D
GO:CC	cell projection	GO:0042995	0.000100957	3.99587	2533	640	99	27317	ASL,GDI1,OPTN,NDN,GAP43,ACOT7,DYNC1I1,SAMD14,CCDC39,SKOR1,DPYSL5,HSP90AA1,EEF1A1,HSP90AB1,CD200,RDX,DPYSL3,ACHE,NINJ1,BBS2,CDC45,RIT2,RHOU,GPI1,ADAM15,CORO1C,NRBP1,PGRMC1,TPX2,RAB27A,MAPK3,FCHSD1,INPP5F,CHL1,HDAC1,VASP,HCN3,MAST1,KIZ,HSPA8,ZWINT,CHRNB2,SHARPIN,FUZ,ATAT1,ILK,LHFPL5,RSPH9,PCDH11X,STMN2,SLC38A7,CLRN1,CPT1C,CCT8,TCTN1,COQ6,PPFIA1,IRX3,AHCY,SIRT1,ARPC5,BBS9,ARL6,LCA5,CATSPERD,SLC5A6,B…
GO:CC	intracellular non-membrane-bounded organelle	GO:0043232	0.000321656	3.49261	6373	640	202	27317	ONECUT2,PAX2,USP11,EN2,NDN,PNMA3,TUBB2A,TSPYL2,ASH2L,KLHL4,DYNC1I1,SAMD14,MORF4L2,CCDC39,SMC4,UCMA,MAGED1,ANAPC5,SRSF5,EEF1A1,SMARCA1,HSP90AB1,HSDL1,CCT3,RDX,DPYSL3,SNCAIP,STIL,STAT6,SRSF2,BBS2,CDC45,HSD17B11,SAMHD1,TSPYL3,RHOU,ORC3,ACADVL,BEX4,CCT5,CENPC1,MID2,CORO1C,SUV39H1,HAUS4,TPX2,MAGED2,PRIM1,TERF2IP,MRI1,MAPK3,TTC28,TIA1,FCHSD1,9930104L06RIK,MLH3,RNF2,TUBA1A,TELO2,PHF1,TRPC4,HDAC1,VASP,HD…
GO:CC	non-membrane-bounded organelle	GO:0043228	0.000325355	3.48764	6374	640	202	27317	ONECUT2,PAX2,USP11,EN2,NDN,PNMA3,TUBB2A,TSPYL2,ASH2L,KLHL4,DYNC1I1,SAMD14,MORF4L2,CCDC39,SMC4,UCMA,MAGED1,ANAPC5,SRSF5,EEF1A1,SMARCA1,HSP90AB1,HSDL1,CCT3,RDX,DPYSL3,SNCAIP,STIL,STAT6,SRSF2,BBS2,CDC45,HSD17B11,SAMHD1,TSPYL3,RHOU,ORC3,ACADVL,BEX4,CCT5,CENPC1,MID2,CORO1C,SUV39H1,HAUS4,TPX2,MAGED2,PRIM1,TERF2IP,MRI1,MAPK3,TTC28,TIA1,FCHSD1,9930104L06RIK,MLH3,RNF2,TUBA1A,TELO2,PHF1,TRPC4,HDAC1,VASP,HD…
GO:CC	chaperone complex	GO:0101031	0.00033378	3.47654	34	640	8	27317	HSP90AB1,CCT3,CCT5,HSPA8,CCT2,CCT8,STIP1,BAG2
GO:CC	catalytic complex	GO:1902494	0.000515298	3.28794	1563	640	67	27317	ASH2L,DYNC1I1,PAFAH1B3,MORF4L2,PSME1,ANAPC5,ARXES2,SMARCA1,PRPS1L3,WDR41,PRIM1,RNF2,PHF1,POLR3GL,HDAC1,HDAC2,NAA16,PAF1,PRKRA,SHARPIN,DIS3,PSME2,MED12,SNX4,ATG16L2,SRSF1,GTF2H2,MCCC2,PRPSAP2,SIRT1,HTRA2,POLA2,DIS3L,EME2,DDX5,MAT2A,DNAH5,ACTR5,HNRNPA2B1,ILVBL,RING1,MBIP,GPAA1,GMPR2,DNAH7B,INO80B,HDAC10,FBXO6,DMAP1,PRPS1,GNG4,DCAF12L1,HNRNPH1,PRKDC,CWC22,PIGV,RAD51,PRMT1,RNF31,SPTSSA,FBXL6,SUPT20,S…
GO:CC	chromatin	GO:0000785	0.00056212	3.25017	669	640	37	27317	TSPYL2,ASH2L,MORF4L2,MAGED1,SMARCA1,STAT6,SRSF2,TSPYL3,ORC3,CENPC1,SUV39H1,RNF2,TELO2,HDAC1,HDAC2,PAF1,MTBP,NAP1L5,STAG1,NAP1L3,SIRT1,HTRA2,ACTR5,HNRNPA2B1,RING1,NHLH2,INO80B,DMAP1,TRP53,RAD51,HMGN1,H3F3B,POU4F2,TONSL,SAP30,CITED2,TRP73
GO:CC	plasma membrane bounded cell projection	GO:0120025	0.00122194	2.91295	2437	640	92	27317	ASL,GDI1,OPTN,GAP43,ACOT7,DYNC1I1,SAMD14,CCDC39,SKOR1,DPYSL5,HSP90AA1,EEF1A1,HSP90AB1,CD200,RDX,DPYSL3,ACHE,NINJ1,BBS2,CDC45,RIT2,GPI1,ADAM15,CORO1C,NRBP1,PGRMC1,TPX2,RAB27A,MAPK3,INPP5F,CHL1,HDAC1,VASP,HCN3,MAST1,HSPA8,ZWINT,CHRNB2,SHARPIN,ATAT1,ILK,LHFPL5,RSPH9,PCDH11X,STMN2,SLC38A7,CLRN1,CPT1C,CCT8,TCTN1,PPFIA1,IRX3,AHCY,SIRT1,ARPC5,BBS9,ARL6,LCA5,CATSPERD,SLC5A6,BLOC1S5,HSPD1,NPHP1,CIB2,DNAH5…
GO:CC	intracellular organelle lumen	GO:0070013	0.00468623	2.32918	6350	640	195	27317	ONECUT2,SFMBT2,TWIST1,PAX2,GPRASP2,USP11,EN2,NDN,PNMA3,TSPYL2,ASH2L,ACOT7,MORF4L2,SMC4,TFAP2A,PSME1,SCAPER,SKAP2,SRSF5,EEF1A1,FKBP14,SMARCA1,FAF1,PRMT2,SOX3,SNCAIP,ELAC1,MACROD1,ACHE,NFYA,NT5E,STAT6,SRSF2,CDC45,RIT2,PRR13,SAMHD1,GPI1,ORC3,ACADVL,BEX4,TMEM43,CENPC1,CREB3L3,DLX4,RRM2B,SUV39H1,TPX2,MAGED2,LTA4H,PRIM1,TERF2IP,MRI1,PABPN1,MAPK3,TIA1,9930104L06RIK,MLH3,RNF2,ACAA1A,TELO2,PHF1,FPGS,HDAC1…
GO:CC	membrane-enclosed lumen	GO:0031974	0.00473402	2.32477	6351	640	195	27317	ONECUT2,SFMBT2,TWIST1,PAX2,GPRASP2,USP11,EN2,NDN,PNMA3,TSPYL2,ASH2L,ACOT7,MORF4L2,SMC4,TFAP2A,PSME1,SCAPER,SKAP2,SRSF5,EEF1A1,FKBP14,SMARCA1,FAF1,PRMT2,SOX3,SNCAIP,ELAC1,MACROD1,ACHE,NFYA,NT5E,STAT6,SRSF2,CDC45,RIT2,PRR13,SAMHD1,GPI1,ORC3,ACADVL,BEX4,TMEM43,CENPC1,CREB3L3,DLX4,RRM2B,SUV39H1,TPX2,MAGED2,LTA4H,PRIM1,TERF2IP,MRI1,PABPN1,MAPK3,TIA1,9930104L06RIK,MLH3,RNF2,ACAA1A,TELO2,PHF1,FPGS,HDAC1…
GO:CC	organelle lumen	GO:0043233	0.00473402	2.32477	6351	640	195	27317	ONECUT2,SFMBT2,TWIST1,PAX2,GPRASP2,USP11,EN2,NDN,PNMA3,TSPYL2,ASH2L,ACOT7,MORF4L2,SMC4,TFAP2A,PSME1,SCAPER,SKAP2,SRSF5,EEF1A1,FKBP14,SMARCA1,FAF1,PRMT2,SOX3,SNCAIP,ELAC1,MACROD1,ACHE,NFYA,NT5E,STAT6,SRSF2,CDC45,RIT2,PRR13,SAMHD1,GPI1,ORC3,ACADVL,BEX4,TMEM43,CENPC1,CREB3L3,DLX4,RRM2B,SUV39H1,TPX2,MAGED2,LTA4H,PRIM1,TERF2IP,MRI1,PABPN1,MAPK3,TIA1,9930104L06RIK,MLH3,RNF2,ACAA1A,TELO2,PHF1,FPGS,HDAC1…
GO:CC	centrosome	GO:0005813	0.00607305	2.21659	629	640	33	27317	PAX2,NDN,KLHL4,STIL,CDC45,CCT5,HAUS4,TTC28,PHF1,KIZ,HOOK2,CEP57,CEP120,LATS2,UPF3B,RAPGEF6,CCT8,TTC12,BBS9,DIS3L,GPAA1,BBS7,TRP53,CEP78,FLOT1,IFT46,LRRC45,SLC18A2,TCEA2,PTPN20,APEX1,CAPRIN2,TAF1D
GO:CC	protein-containing complex	GO:0032991	0.0068941	2.16152	6977	640	210	27317	PAX2,EMID1,GDI1,NDN,CDH18,ASH2L,DYNC1I1,PAFAH1B3,MORF4L2,SMC4,MAGED1,PSME1,COL5A3,SKOR1,DPYSL5,ANAPC5,GSPT2,WDR6,ARXES2,HSP90AA1,RANBP17,SMARCA1,FAF1,EIF2S3Y,HSP90AB1,CCT3,GRB10,DPYSL3,STIL,SEC24D,PRPS1L3,NFYA,WDR41,STAT6,SRSF2,BBS2,RRAGB,CDC45,STK3,ORC3,CCT5,CORO1C,VBP1,SUV39H1,HAUS4,PRIM1,TERF2IP,PABPN1,MAPK3,TIA1,MLH3,STAT4,RNF2,TELO2,PHF1,MYEF2,TRPC4,POLR3GL,HDAC1,CWF19L2,NELFB,GPN3,HDAC2,PRD…
GO:CC	cell body	GO:0044297	0.00694408	2.15839	807	640	39	27317	ASL,GDI1,OPTN,GAP43,ACOT7,SKOR1,DPYSL5,HSP90AA1,HSP90AB1,CCT3,CD200,DPYSL3,ACHE,RIT2,CCT5,PGRMC1,TPX2,FCHSD1,INPP5F,HDAC1,HCN3,MAST1,HSPA8,CCT2,ILK,STMN2,ZC4H2,SLC38A7,CCT8,NUCB2,HNRNPA2B1,UCHL1,EFNA2,RAC3,CALCA,SLC18A2,NQO1,GNG3,CALCR
GO:CC	nuclear chromosome	GO:0000228	0.0104374	1.98141	323	640	21	27317	SMC4,SRSF2,CDC45,ORC3,PRIM1,MLH3,HDAC1,HDAC2,XLR3A,POLA2,ACTR5,INO80B,MEI4,DMAP1,RAD21L,RAD51,H3F3B,TONSL,SAP30,HELB,XPA
GO:CC	nuclear lumen	GO:0031981	0.0121276	1.91623	5823	640	179	27317	ONECUT2,SFMBT2,TWIST1,PAX2,GPRASP2,USP11,EN2,NDN,PNMA3,TSPYL2,ASH2L,ACOT7,MORF4L2,SMC4,TFAP2A,PSME1,SCAPER,SKAP2,SRSF5,EEF1A1,SMARCA1,FAF1,PRMT2,SOX3,SNCAIP,ELAC1,MACROD1,NFYA,NT5E,STAT6,SRSF2,CDC45,RIT2,PRR13,SAMHD1,GPI1,ORC3,ACADVL,BEX4,CENPC1,CREB3L3,DLX4,RRM2B,SUV39H1,TPX2,MAGED2,LTA4H,PRIM1,TERF2IP,MRI1,PABPN1,MAPK3,TIA1,9930104L06RIK,MLH3,RNF2,TELO2,PHF1,HDAC1,NELFB,HDAC2,SPARC,HSPA8,CKAP4,…
GO:CC	transcription regulator complex	GO:0005667	0.0140937	1.85098	515	640	28	27317	PAX2,SKOR1,NFYA,STAT6,STAT4,HDAC1,HDAC2,LBX1,ASCC1,GTF3C6,CTBP2,TBX2,GTF2H2,PAX3,WTIP,TFAP4,MEIS1,AATF,HNF1B,PAX7,TRP53,PRKDC,LHX1,POU4F2,BEX2,MED30,APEX1,TAF1D
GO:CC	neuron projection	GO:0043005	0.0181432	1.74129	1578	640	62	27317	ASL,GDI1,OPTN,GAP43,ACOT7,DYNC1I1,SAMD14,SKOR1,DPYSL5,HSP90AA1,HSP90AB1,CD200,RDX,DPYSL3,ACHE,BBS2,RIT2,GPI1,PGRMC1,TPX2,RAB27A,INPP5F,CHL1,HDAC1,HCN3,MAST1,HSPA8,ZWINT,CHRNB2,SHARPIN,ATAT1,ILK,LHFPL5,RSPH9,STMN2,SLC38A7,CLRN1,CPT1C,PPFIA1,IRX3,AHCY,SIRT1,ARPC5,LCA5,BLOC1S5,CIB2,HNRNPA2B1,RPGRIP1,UCHL1,BBS7,GHSR,GLRA2,BAG2,FAM126A,RAC3,SLC4A7,CALCA,SLC18A2,NQO1,GNG3,CALCR,SNAPIN
GO:CC	mitochondrial outer membrane	GO:0005741	0.0196047	1.70764	193	640	15	27317	ASL,ARMCX4,MSTO1,MAOA,PGRMC1,NELFB,AIFM2,AGPAT4,VDAC3,CPT1C,ABCB6,MIEF2,TAZ,CAPN10,ARMCX1
GO:CC	chaperonin-containing T-complex	GO:0005832	0.020296	1.69259	10	640	4	27317	CCT3,CCT5,CCT2,CCT8
GO:CC	microtubule organizing center	GO:0005815	0.0222404	1.65286	821	640	38	27317	PAX2,NDN,KLHL4,STIL,BBS2,CDC45,CCT5,HAUS4,TTC28,PHF1,KIZ,HOOK2,CEP57,CEP120,LATS2,UPF3B,RAPGEF6,CCT8,TTC12,BBS9,TMUB1,LCA5,DIS3L,IQCD,GPAA1,BBS7,TRP53,RAD51,CEP78,FLOT1,IFT46,LRRC45,SLC18A2,TCEA2,PTPN20,APEX1,CAPRIN2,TAF1D
GO:CC	outer membrane	GO:0019867	0.0261847	1.58195	221	640	16	27317	ASL,ARMCX4,MSTO1,MAOA,PGRMC1,NELFB,AIFM2,AGPAT4,VDAC3,CPT1C,ABCB6,MIEF2,NUCB2,TAZ,CAPN10,ARMCX1
GO:CC	organelle outer membrane	GO:0031968	0.0261847	1.58195	221	640	16	27317	ASL,ARMCX4,MSTO1,MAOA,PGRMC1,NELFB,AIFM2,AGPAT4,VDAC3,CPT1C,ABCB6,MIEF2,NUCB2,TAZ,CAPN10,ARMCX1
GO:CC	nuclear replisome	GO:0043601	0.0375262	1.42567	21	640	5	27317	PRIM1,POLA2,TONSL,HELB,XPA
GO:CC	ribose phosphate diphosphokinase complex	GO:0002189	0.0447737	1.34898	5	640	3	27317	PRPS1L3,PRPSAP2,PRPS1
GO:CC	replisome	GO:0030894	0.0476307	1.32211	22	640	5	27317	PRIM1,POLA2,TONSL,HELB,XPA
GO:CC	nuclear body	GO:0016604	0.048558	1.31374	915	640	40	27317	SFMBT2,SMC4,SCAPER,SRSF5,SRSF2,ORC3,CENPC1,TERF2IP,PABPN1,RNF2,TELO2,CKAP4,ZWINT,CCNDBP1,HEXIM2,ASCC1,GTF3C6,STAG1,SRSF1,SRSF6,RBM4B,GTF2H2,SIRT1,OSGEP,RDM1,HNRNPA2B1,TRIM27,RING1,ZFP53,TRP53,CWC22,AFF2,RAD51,ZFP677,FBL,POU4F2,TONSL,RBM11,APEX1,OTP
REAC	BBSome-mediated cargo-targeting to cilium	REAC:R-MMU-5620922	0.000152428	3.81693	23	289	8	8710	CCT3,BBS2,CCT5,CCT2,CCT8,BBS9,ARL6,BBS7
REAC	Metabolism of nucleotides	REAC:R-MMU-15869	0.0172302	1.76371	92	289	12	8710	NT5E,SAMHD1,UCKL1,RRM2B,ATIC,NT5C1A,GMPR2,CTPS2,DGUOK,DPYD,DNPH1,ADPRM
REAC	Cooperation of PDCL (PhLP1) and TRiC/CCT in G-protein beta folding	REAC:R-MMU-6814122	0.0447829	1.34889	35	289	7	8710	CCT3,CCT5,CCT2,CCT8,GNG4,GNG3,GNG10
REAC	Association of TriC/CCT with target proteins during biosynthesis	REAC:R-MMU-390471	0.0471612	1.32642	9	289	4	8710	CCT3,CCT5,CCT2,CCT8
TF	Factor: E2F-1; motif: GNGGGCGGGRMN	TF:M10209	5.90076e-33	32.2291	14278	663	574	21833	ONECUT2,SFMBT2,TWIST1,ECE2,PAX2,LGALS8,GPRASP2,RIMKLB,USP11,ASL,SLC29A4,EMID1,EBF4,PNCK,GDI1,EN2,OPTN,ZFP503,PNMA3,TUBB2A,TSPYL2,ASH2L,KLHL4,ZCCHC18,ACOT7,DYNC1I1,SAMD14,PAFAH1B3,MORF4L2,DGKA,ARL10,SMC4,TFAP2A,TBKBP1,BEX1,MAGED1,PSME1,SCAPER,COL5A3,SKOR1,DPYSL5,ANAPC5,GSPT2,WDR6,SKAP2,ARXES2,SRSF5,HSP90AA1,EEF1A1,RAB34,TMEM117,RANBP17,SMARCA1,FAF1,EIF2S3Y,TRMT2B,PRMT2,SOX3,HSP90AB1,HSDL1,CCT3,GRB…
TF	Factor: FOXN4; motif: NNWANNCGWMCGCGTCNNNNMT	TF:M04662	1.41348e-28	27.8497	16026	663	605	21833	ONECUT2,SFMBT2,TWIST1,FHL1,ECE2,GPRASP1,PAX2,LGALS8,RIMKLB,USP11,ASL,SLC29A4,EMID1,EBF4,PNCK,GDI1,EN2,OPTN,ZFP503,PNMA3,GAP43,CDH18,TUBB2A,TSPYL2,NRIP2,DYNC1I1,ZSCAN18,SAMD14,PAFAH1B3,MORF4L2,DGKA,ARL10,SMC4,TFAP2A,TBKBP1,BEX1,MAGED1,PSME1,SCAPER,COL5A3,SKOR1,DPYSL5,ANAPC5,GSPT2,WDR6,SKAP2,ARXES2,SRSF5,HSP90AA1,EEF1A1,RAB34,TMEM117,RANBP17,FKBP14,SMARCA1,FAF1,EIF2S3Y,TRMT2B,PRMT2,SOX3,HSP90AB1,HS…
TF	Factor: ZF5; motif: GSGCGCGR	TF:M00716	1.31361e-20	19.8815	14878	663	563	21833	ONECUT2,SFMBT2,TWIST1,ECE2,PAX2,LGALS8,GPRASP2,RIMKLB,SLC29A4,EMID1,EBF4,PNCK,GDI1,EN2,OPTN,ZFP503,GAP43,TUBB2A,TSPYL2,ASH2L,ZCCHC18,DYNC1I1,ZSCAN18,SAMD14,PAFAH1B3,MORF4L2,DGKA,ARL10,SMC4,TFAP2A,TBKBP1,BEX1,UCMA,MAGED1,PSME1,SCAPER,COL5A3,SKOR1,DPYSL5,ANAPC5,GSPT2,WDR6,SKAP2,ARXES2,SRSF5,HSP90AA1,EEF1A1,RAB34,TMEM117,RANBP17,SMARCA1,FAF1,EIF2S3Y,TRMT2B,PRMT2,SOX3,HSP90AB1,HSDL1,CCT3,GRB10,CD200,…
TF	Factor: ZF5; motif: NRNGNGCGCGCWN	TF:M00333	7.55906e-20	19.1215	14505	663	552	21833	ONECUT2,SFMBT2,TWIST1,ECE2,GPRASP1,PAX2,LGALS8,GPRASP2,RIMKLB,USP11,ASL,SLC29A4,EMID1,EBF4,PNCK,GDI1,EN2,OPTN,ZFP503,GAP43,CDH18,TSPYL2,ASH2L,ZCCHC18,NRIP2,DYNC1I1,ZSCAN18,SAMD14,PAFAH1B3,MORF4L2,CCDC39,DGKA,ARL10,SMC4,TFAP2A,TBKBP1,BEX1,UCMA,MAGED1,SCAPER,COL5A3,SKOR1,DPYSL5,ANAPC5,WDR6,SKAP2,ARXES2,SRSF5,HSP90AA1,EEF1A1,RAB34,TMEM117,RANBP17,SMARCA1,FAF1,TRMT2B,PRMT2,SOX3,HSP90AB1,HSDL1,CCT3,GR…
TF	Factor: FOXN4; motif: NNWANNCGWMCGCGTCNNNNMT; match class: 1	TF:M04662_1	3.97641e-19	18.4005	12809	663	506	21833	ONECUT2,SFMBT2,TWIST1,ECE2,GPRASP1,PAX2,LGALS8,RIMKLB,USP11,ASL,SLC29A4,EMID1,EBF4,PNCK,EN2,ZFP503,PNMA3,TSPYL2,NRIP2,DYNC1I1,ZSCAN18,SAMD14,PAFAH1B3,MORF4L2,DGKA,ARL10,SMC4,TFAP2A,TBKBP1,BEX1,MAGED1,SCAPER,COL5A3,SKOR1,DPYSL5,ANAPC5,GSPT2,WDR6,SKAP2,ARXES2,SRSF5,HSP90AA1,EEF1A1,RAB34,TMEM117,SMARCA1,FAF1,EIF2S3Y,PRMT2,SOX3,HSP90AB1,HSDL1,CCT3,GRB10,CD200,RDX,DPYSL3,ZFP28,APEH,SNCAIP,ELAC1,MMAB,M…
TF	Factor: E2F-1; motif: GNGGGCGGGRMN; match class: 1	TF:M10209_1	1.01969e-18	17.9915	10651	663	444	21833	ONECUT2,SFMBT2,TWIST1,ECE2,PAX2,LGALS8,RIMKLB,USP11,SLC29A4,EMID1,EBF4,PNCK,GDI1,EN2,OPTN,ZFP503,PNMA3,TUBB2A,TSPYL2,ASH2L,ZCCHC18,ACOT7,DYNC1I1,SAMD14,PAFAH1B3,MORF4L2,DGKA,ARL10,SMC4,TFAP2A,TBKBP1,BEX1,MAGED1,PSME1,SCAPER,COL5A3,SKOR1,DPYSL5,ANAPC5,WDR6,SKAP2,SRSF5,HSP90AA1,EEF1A1,RAB34,TMEM117,RANBP17,SMARCA1,FAF1,EIF2S3Y,TRMT2B,SOX3,HSP90AB1,HSDL1,CCT3,GRB10,CD200,DPYSL3,ZFP28,APEH,SNCAIP,ELA…
TF	Factor: BEN; motif: CAGCGRNV	TF:M01240	1.73357e-18	17.7611	16268	663	591	21833	ONECUT2,SFMBT2,TWIST1,ECE2,GPRASP1,PAX2,LGALS8,GPRASP2,RIMKLB,USP11,ASL,SLC29A4,EMID1,EBF4,PNCK,GDI1,EN2,OPTN,ZFP503,PNMA3,CDH18,TUBB2A,TSPYL2,ASH2L,ZCCHC18,ACOT7,NRIP2,DYNC1I1,ZSCAN18,SAMD14,PAFAH1B3,MORF4L2,DGKA,ARL10,SMC4,TFAP2A,TBKBP1,BEX1,MAGED1,PSME1,SCAPER,COL5A3,SKOR1,DPYSL5,ANAPC5,GSPT2,WDR6,SKAP2,ARXES2,SRSF5,HSP90AA1,EEF1A1,RAB34,TMEM117,RANBP17,FKBP14,SMARCA1,FAF1,EIF2S3Y,TRMT2B,PRMT2…
TF	Factor: ZF5; motif: GSGCGCGR; match class: 1	TF:M00716_1	2.55659e-18	17.5923	12090	663	484	21833	ONECUT2,SFMBT2,TWIST1,ECE2,PAX2,LGALS8,GPRASP2,RIMKLB,SLC29A4,EMID1,EBF4,PNCK,GDI1,EN2,OPTN,ZFP503,GAP43,TUBB2A,TSPYL2,ZCCHC18,DYNC1I1,ZSCAN18,SAMD14,PAFAH1B3,MORF4L2,DGKA,ARL10,TFAP2A,TBKBP1,BEX1,MAGED1,PSME1,SCAPER,COL5A3,SKOR1,DPYSL5,ANAPC5,GSPT2,WDR6,SKAP2,ARXES2,SRSF5,HSP90AA1,EEF1A1,RAB34,TMEM117,RANBP17,SMARCA1,FAF1,EIF2S3Y,TRMT2B,PRMT2,SOX3,HSP90AB1,HSDL1,GRB10,RDX,DPYSL3,ZFP28,APEH,SNCAI…
TF	Factor: E2F-4; motif: GCGGGAAANA	TF:M02090	7.55072e-18	17.122	10366	663	433	21833	ONECUT2,SFMBT2,TWIST1,PAX2,GPRASP2,RIMKLB,USP11,SLC29A4,EBF4,GDI1,EN2,OPTN,ZFP503,GAP43,CDH18,TSPYL2,KLHL4,ACOT7,DYNC1I1,SAMD14,DGKA,ARL10,SMC4,TBKBP1,BEX1,MAGED1,PSME1,SCAPER,COL5A3,ANAPC5,WDR6,SKAP2,EEF1A1,RAB34,TMEM117,RANBP17,SMARCA1,FAF1,EIF2S3Y,TRMT2B,SOX3,HSP90AB1,HSDL1,CCT3,GRB10,RDX,ZFP28,APEH,SNCAIP,ELAC1,MMAB,MACROD1,ZMAT1,REM2,SEC24D,ACHE,RSRP1,PRPS1L3,CGREF1,NFYA,WDR41,NT5E,NINJ1,IRX…
TF	Factor: E2F-3; motif: GGCGGGN	TF:M02089	2.09907e-17	16.678	11302	663	459	21833	ONECUT2,SFMBT2,TWIST1,ECE2,PAX2,LGALS8,GPRASP2,RIMKLB,USP11,ASL,SLC29A4,EMID1,EBF4,PNCK,GDI1,EN2,OPTN,ZFP503,PNMA3,TSPYL2,ZCCHC18,ACOT7,DYNC1I1,SAMD14,PAFAH1B3,MORF4L2,DGKA,ARL10,SMC4,TFAP2A,TBKBP1,BEX1,MAGED1,PSME1,SCAPER,COL5A3,SKOR1,DPYSL5,ANAPC5,WDR6,SKAP2,ARXES2,SRSF5,HSP90AA1,EEF1A1,RAB34,TMEM117,RANBP17,SMARCA1,FAF1,EIF2S3Y,TRMT2B,PRMT2,SOX3,HSP90AB1,HSDL1,CCT3,GRB10,CD200,RDX,DPYSL3,ZFP28…
TF	Factor: Sp1; motif: NGGGGCGGGGN	TF:M07395	3.65059e-17	16.4376	9148	663	394	21833	ONECUT2,SFMBT2,TWIST1,PAX2,LGALS8,GPRASP2,RIMKLB,SLC29A4,EMID1,EBF4,PNCK,GDI1,EN2,ZFP503,PNMA3,TSPYL2,ZCCHC18,ACOT7,DYNC1I1,SAMD14,PAFAH1B3,MORF4L2,DGKA,SMC4,TFAP2A,TBKBP1,MAGED1,SCAPER,COL5A3,SKOR1,DPYSL5,ANAPC5,GSPT2,WDR6,SKAP2,ARXES2,SRSF5,HSP90AA1,RAB34,TMEM117,RANBP17,SMARCA1,FAF1,EIF2S3Y,TRMT2B,PRMT2,SOX3,HSP90AB1,CCT3,GRB10,CD200,RDX,DPYSL3,APEH,SNCAIP,ELAC1,MMAB,MACROD1,ZMAT1,SEC24D,ACHE,…
TF	Factor: Kaiso; motif: SARNYCTCGCGAGAN	TF:M10276	3.84047e-17	16.4156	13536	663	520	21833	ONECUT2,SFMBT2,TWIST1,ECE2,PAX2,LGALS8,GPRASP2,RIMKLB,USP11,ASL,RGS13,SLC29A4,EMID1,EBF4,PNCK,GDI1,EN2,OPTN,NDN,ZFP503,PNMA3,GAP43,TUBB2A,TSPYL2,ASH2L,KLHL4,ZCCHC18,ACOT7,NRIP2,DYNC1I1,SAMD14,PAFAH1B3,MORF4L2,DGKA,ARL10,SMC4,TFAP2A,TBKBP1,BEX1,MAGED1,SCAPER,SKOR1,DPYSL5,ANAPC5,GSPT2,WDR6,ARXES2,SRSF5,HSP90AA1,EEF1A1,RAB34,TMEM117,RANBP17,SMARCA1,FAF1,EIF2S3Y,SOX3,HSP90AB1,HSDL1,CCT3,GRB10,CD200,R…
TF	Factor: E2F-1; motif: NNNSSCGCSAANN	TF:M07250	8.48281e-17	16.0715	9056	663	390	21833	ONECUT2,TWIST1,FHL1,ECE2,GPRASP1,GPRASP2,RIMKLB,USP11,ASL,EMID1,EBF4,EN2,PNMA3,GAP43,TUBB2A,TSPYL2,ACOT7,NRIP2,DYNC1I1,ZSCAN18,SAMD14,PAFAH1B3,MORF4L2,ARL10,SMC4,TFAP2A,TBKBP1,BEX1,MAGED1,SCAPER,SKOR1,ANAPC5,SKAP2,ARXES2,SRSF5,EEF1A1,RAB34,RANBP17,SMARCA1,FAF1,EIF2S3Y,TRMT2B,SOX3,HSP90AB1,HSDL1,CCT3,GRB10,RDX,DPYSL3,ZFP28,SNCAIP,STIL,MACROD1,ZMAT1,SEC24D,PRPS1L3,NFYA,WDR41,NINJ1,IRX5,SRSF2,ZFP157…
TF	Factor: Sp1; motif: NNGGGGCGGGGNN	TF:M00932	3.89199e-16	15.4098	8963	663	385	21833	ONECUT2,SFMBT2,TWIST1,ECE2,PAX2,LGALS8,GPRASP2,RIMKLB,ASL,SLC29A4,EMID1,EBF4,PNCK,GDI1,EN2,ZFP503,PNMA3,TSPYL2,ZCCHC18,ACOT7,DYNC1I1,SAMD14,PAFAH1B3,MORF4L2,DGKA,SMC4,TFAP2A,TBKBP1,MAGED1,SCAPER,COL5A3,SKOR1,DPYSL5,ANAPC5,WDR6,SKAP2,ARXES2,SRSF5,HSP90AA1,EEF1A1,RAB34,TMEM117,RANBP17,SMARCA1,FAF1,EIF2S3Y,TRMT2B,PRMT2,SOX3,HSP90AB1,CCT3,GRB10,CD200,RDX,DPYSL3,APEH,SNCAIP,MMAB,MACROD1,ZMAT1,REM2,SEC…
TF	Factor: BEN; motif: CAGCGRNV; match class: 1	TF:M01240_1	1.31177e-15	14.8821	12021	663	474	21833	ONECUT2,SFMBT2,TWIST1,ECE2,PAX2,LGALS8,RIMKLB,USP11,ASL,SLC29A4,EMID1,EBF4,PNCK,GDI1,EN2,OPTN,ZFP503,CDH18,TUBB2A,TSPYL2,ZCCHC18,DYNC1I1,ZSCAN18,SAMD14,PAFAH1B3,MORF4L2,DGKA,ARL10,SMC4,TFAP2A,TBKBP1,BEX1,MAGED1,SCAPER,COL5A3,SKOR1,DPYSL5,GSPT2,WDR6,SKAP2,ARXES2,SRSF5,HSP90AA1,EEF1A1,RAB34,TMEM117,RANBP17,FKBP14,SMARCA1,TRMT2B,PRMT2,SOX3,HSP90AB1,HSDL1,GRB10,RDX,DPYSL3,ZFP28,APEH,SNCAIP,ELAC1,STIL…
TF	Factor: BCL6B; motif: NNNNCCGCCCCWNNNN	TF:M02844	4.03919e-15	14.3937	13716	663	519	21833	ONECUT2,SFMBT2,TWIST1,FHL1,ECE2,GPRASP1,PAX2,LGALS8,GPRASP2,RIMKLB,USP11,ASL,SLC29A4,EMID1,EBF4,PNCK,GDI1,EN2,OPTN,ZFP503,PNMA3,GAP43,CDH18,TUBB2A,TSPYL2,ASH2L,ZCCHC18,ACOT7,NRIP2,SAMD14,PAFAH1B3,MORF4L2,DGKA,ARL10,SMC4,TFAP2A,TBKBP1,BEX1,MAGED1,SCAPER,SKOR1,DPYSL5,ANAPC5,GSPT2,WDR6,SKAP2,ARXES2,SRSF5,HSP90AA1,EEF1A1,RAB34,TMEM117,RANBP17,SMARCA1,FAF1,EIF2S3Y,TRMT2B,PRMT2,SOX3,HSP90AB1,HSDL1,CCT3…
TF	Factor: ELK-1; motif: ACCGGAWRTN	TF:M01981	2.36062e-14	13.627	14719	663	543	21833	SFMBT2,TWIST1,FHL1,GPRASP1,PAX2,LGALS8,RIMKLB,USP11,ASL,SLC29A4,EMID1,PNCK,GDI1,EN2,OPTN,NDN,PNMA3,CDH18,TUBB2A,TSPYL2,ASH2L,ACOT7,NRIP2,DYNC1I1,ZSCAN18,SAMD14,PAFAH1B3,MORF4L2,DGKA,ARL10,SMC4,TBKBP1,MAGED1,SCAPER,COL5A3,SKOR1,DPYSL5,GSPT2,WDR6,SKAP2,SRSF5,HSP90AA1,EEF1A1,RAB34,TMEM117,RANBP17,FKBP14,SMARCA1,FAF1,PRMT2,SOX3,HSP90AB1,CCT3,GRB10,CD200,RDX,DPYSL3,ZFP28,APEH,SNCAIP,ELAC1,STIL,SAT2,ZM…
TF	Factor: Sp1; motif: GGGGCGGGGC	TF:M00931	2.86528e-14	13.5428	8681	663	370	21833	ONECUT2,SFMBT2,TWIST1,PAX2,LGALS8,GPRASP2,RIMKLB,ASL,SLC29A4,EMID1,EBF4,PNCK,GDI1,ZFP503,PNMA3,TSPYL2,ZCCHC18,ACOT7,DYNC1I1,SAMD14,PAFAH1B3,MORF4L2,DGKA,SMC4,TFAP2A,TBKBP1,MAGED1,SCAPER,COL5A3,SKOR1,DPYSL5,ANAPC5,WDR6,SKAP2,ARXES2,SRSF5,HSP90AA1,RAB34,TMEM117,RANBP17,SMARCA1,FAF1,EIF2S3Y,TRMT2B,PRMT2,SOX3,HSP90AB1,CCT3,GRB10,CD200,RDX,DPYSL3,ZFP28,APEH,SNCAIP,MMAB,MACROD1,ZMAT1,SEC24D,ACHE,PRPS1L…
TF	Factor: Sp1; motif: NGGGGGCGGGGYN	TF:M00196	3.21125e-14	13.4933	8814	663	374	21833	ONECUT2,SFMBT2,TWIST1,PAX2,LGALS8,GPRASP2,RIMKLB,ASL,SLC29A4,EMID1,EBF4,PNCK,GDI1,ZFP503,PNMA3,TSPYL2,ZCCHC18,ACOT7,DYNC1I1,SAMD14,PAFAH1B3,MORF4L2,DGKA,SMC4,TFAP2A,TBKBP1,BEX1,MAGED1,SCAPER,COL5A3,SKOR1,DPYSL5,ANAPC5,WDR6,SKAP2,ARXES2,SRSF5,HSP90AA1,RAB34,TMEM117,RANBP17,SMARCA1,FAF1,EIF2S3Y,TRMT2B,PRMT2,SOX3,HSP90AB1,CCT3,GRB10,CD200,RDX,DPYSL3,APEH,SNCAIP,MMAB,MACROD1,ZMAT1,SEC24D,ACHE,PRPS1L3…
TF	Factor: E2F; motif: GGCGSG	TF:M00803	2.36764e-13	12.6257	10451	663	421	21833	ONECUT2,SFMBT2,TWIST1,ECE2,GPRASP1,PAX2,RIMKLB,SLC29A4,EMID1,EBF4,PNCK,GDI1,EN2,PNMA3,TUBB2A,TSPYL2,ZCCHC18,DYNC1I1,SAMD14,DGKA,ARL10,TBKBP1,BEX1,MAGED1,SCAPER,COL5A3,SKOR1,DPYSL5,ANAPC5,GSPT2,SKAP2,ARXES2,SRSF5,HSP90AA1,EEF1A1,TMEM117,RANBP17,SMARCA1,FAF1,EIF2S3Y,TRMT2B,PRMT2,SOX3,HSP90AB1,HSDL1,GRB10,RDX,DPYSL3,ZFP28,SNCAIP,ELAC1,STIL,MMAB,MACROD1,ZMAT1,SEC24D,ACHE,RSRP1,CGREF1,NFYA,NINJ1,IRX5,…
TF	Factor: GKLF; motif: GCCMCRCCCNNN	TF:M01588	5.82843e-12	11.2344	7868	663	336	21833	SFMBT2,GPRASP1,LGALS8,GPRASP2,RIMKLB,USP11,SLC29A4,EBF4,PNCK,GDI1,OPTN,PNMA3,TSPYL2,ACOT7,DYNC1I1,SAMD14,PAFAH1B3,MORF4L2,DGKA,SCAPER,COL5A3,SKOR1,ANAPC5,WDR6,SKAP2,SRSF5,HSP90AA1,EEF1A1,TMEM117,RANBP17,SMARCA1,FAF1,EIF2S3Y,TRMT2B,PRMT2,HSP90AB1,HSDL1,CCT3,GRB10,DPYSL3,ZFP28,APEH,MMAB,MACROD1,ZMAT1,SEC24D,RSRP1,PRPS1L3,NFYA,WDR41,NT5E,STAT6,SRSF2,BBS2,RRAGB,ZFP157,PODXL2,CD99L2,ARMCX4,PRR13,TUFT1…
TF	Factor: Sp1; motif: GGNGGGGGNGGGGGMGGGGCNGGG	TF:M10375	1.90139e-11	10.7209	10781	663	424	21833	ONECUT2,SFMBT2,TWIST1,ECE2,PAX2,GPRASP2,RIMKLB,SLC29A4,EMID1,EBF4,PNCK,GDI1,EN2,OPTN,PNMA3,TUBB2A,TSPYL2,ASH2L,ZCCHC18,ACOT7,DYNC1I1,ZSCAN18,SAMD14,PAFAH1B3,MORF4L2,DGKA,ARL10,TFAP2A,TBKBP1,BEX1,MAGED1,PSME1,SCAPER,COL5A3,SKOR1,DPYSL5,ANAPC5,SKAP2,ARXES2,SRSF5,HSP90AA1,EEF1A1,RAB34,TMEM117,RANBP17,FKBP14,SMARCA1,FAF1,TRMT2B,PRMT2,SOX3,HSP90AB1,GRB10,CD200,DPYSL3,APEH,SNCAIP,ELAC1,SAT2,MACROD1,ZMA…
TF	Factor: GKLF; motif: WGGGYGKGGCCN	TF:M09692	1.91969e-11	10.7168	9004	663	370	21833	SFMBT2,GPRASP1,LGALS8,GPRASP2,RIMKLB,USP11,SLC29A4,EBF4,PNCK,GDI1,OPTN,PNMA3,GAP43,TUBB2A,TSPYL2,ASH2L,ACOT7,DYNC1I1,SAMD14,PAFAH1B3,MORF4L2,DGKA,SCAPER,COL5A3,SKOR1,ANAPC5,WDR6,SKAP2,SRSF5,HSP90AA1,EEF1A1,TMEM117,RANBP17,SMARCA1,FAF1,EIF2S3Y,TRMT2B,PRMT2,SOX3,HSP90AB1,HSDL1,CCT3,GRB10,CD200,DPYSL3,ZFP28,APEH,MMAB,MACROD1,ZMAT1,SEC24D,RSRP1,PRPS1L3,NFYA,WDR41,NT5E,STAT6,SRSF2,BBS2,RRAGB,ZFP157,PO…
TF	Factor: Sp1; motif: CCCCGCCCCN	TF:M00933	1.15826e-10	9.93619	8779	663	360	21833	ONECUT2,SFMBT2,TWIST1,ECE2,PAX2,LGALS8,GPRASP2,RIMKLB,ASL,SLC29A4,EMID1,EBF4,PNCK,GDI1,EN2,ZFP503,PNMA3,TSPYL2,ASH2L,KLHL4,ZCCHC18,ACOT7,DYNC1I1,ZSCAN18,SAMD14,PAFAH1B3,MORF4L2,DGKA,SMC4,TFAP2A,TBKBP1,MAGED1,SCAPER,COL5A3,SKOR1,DPYSL5,ANAPC5,WDR6,SKAP2,ARXES2,HSP90AA1,EEF1A1,RAB34,TMEM117,SMARCA1,FAF1,TRMT2B,SOX3,HSP90AB1,CCT3,CD200,RDX,DPYSL3,APEH,MACROD1,ZMAT1,REM2,SEC24D,ACHE,PRPS1L3,NFYA,WDR4…
TF	Factor: GKLF; motif: WGGGYGKGGCCN; match class: 1	TF:M09692_1	1.90964e-10	9.71905	3611	663	184	21833	SFMBT2,LGALS8,RIMKLB,USP11,SLC29A4,EBF4,GDI1,OPTN,PNMA3,ACOT7,SAMD14,PAFAH1B3,MORF4L2,SCAPER,COL5A3,ANAPC5,WDR6,SKAP2,HSP90AA1,EEF1A1,TMEM117,FAF1,EIF2S3Y,PRMT2,HSP90AB1,GRB10,ZFP28,APEH,ZMAT1,SEC24D,PRPS1L3,NFYA,WDR41,STAT6,SRSF2,CD99L2,ARMCX4,TUFT1,GKAP1,STK3,CYB5R1,RNF25,NAGK,CENPC1,ADAM15,DPP7,CORO1C,NRBP1,RRM2B,SUV39H1,PGRMC1,HAUS4,SYNGR3,MAGED2,IZUMO4,AHSA2,MAPK3,FCHSD1,INPP5F,RNF2,PHF1,FPG…
TF	Factor: ZF5; motif: GYCGCGCARNGCNN	TF:M02933	2.17839e-10	9.66186	9523	663	382	21833	ONECUT2,TWIST1,ECE2,GPRASP1,PAX2,GPRASP2,RIMKLB,SLC29A4,EMID1,EBF4,PNCK,GDI1,EN2,TUBB2A,TSPYL2,ZCCHC18,NRIP2,DYNC1I1,ZSCAN18,PAFAH1B3,ARL10,SMC4,TBKBP1,BEX1,MAGED1,SCAPER,COL5A3,SKOR1,DPYSL5,ANAPC5,WDR6,ARXES2,HSP90AA1,EEF1A1,RAB34,TMEM117,RANBP17,FAF1,SOX3,HSP90AB1,HSDL1,GRB10,DPYSL3,SNCAIP,ELAC1,STIL,MMAB,MACROD1,ZMAT1,SEC24D,ACHE,RSRP1,PRPS1L3,CGREF1,NFYA,WDR41,NT5E,NINJ1,IRX5,SRSF2,PODXL2,CD9…
TF	Factor: ZF5; motif: NRNGNGCGCGCWN; match class: 1	TF:M00333_1	2.29711e-10	9.63882	11224	663	433	21833	ONECUT2,SFMBT2,TWIST1,ECE2,GPRASP1,PAX2,LGALS8,GPRASP2,RIMKLB,SLC29A4,EMID1,EBF4,PNCK,GDI1,EN2,ZFP503,GAP43,TSPYL2,ASH2L,ZCCHC18,NRIP2,ZSCAN18,MORF4L2,DGKA,ARL10,SMC4,TFAP2A,TBKBP1,SCAPER,SKOR1,DPYSL5,ANAPC5,ARXES2,SRSF5,HSP90AA1,RAB34,TMEM117,RANBP17,SMARCA1,FAF1,TRMT2B,PRMT2,SOX3,HSP90AB1,HSDL1,CCT3,GRB10,RDX,ZFP28,APEH,SNCAIP,ELAC1,STIL,REM2,SEC24D,RSRP1,PRPS1L3,NFYA,WDR41,NT5E,STAT6,NINJ1,IRX…
TF	Factor: Kaiso; motif: SARNYCTCGCGAGAN; match class: 1	TF:M10276_1	2.9688e-10	9.52742	9999	663	396	21833	SFMBT2,TWIST1,ECE2,PAX2,GPRASP2,RIMKLB,USP11,ASL,EMID1,EBF4,PNCK,GDI1,EN2,OPTN,ZFP503,PNMA3,GAP43,TUBB2A,TSPYL2,ACOT7,DYNC1I1,SAMD14,PAFAH1B3,MORF4L2,DGKA,ARL10,SMC4,BEX1,MAGED1,SCAPER,SKOR1,ANAPC5,WDR6,ARXES2,SRSF5,HSP90AA1,EEF1A1,RAB34,TMEM117,RANBP17,SMARCA1,FAF1,EIF2S3Y,SOX3,HSP90AB1,HSDL1,GRB10,RDX,DPYSL3,ZFP28,SNCAIP,ELAC1,SEC24D,ACHE,RSRP1,PRPS1L3,WDR41,NINJ1,IRX5,SRSF2,RRAGB,ZFP157,PODXL2…
TF	Factor: E2F-4; motif: NGGGGGCGGGRMNN	TF:M10211	6.85584e-10	9.16394	7002	663	300	21833	ONECUT2,SFMBT2,TWIST1,PAX2,RIMKLB,SLC29A4,EMID1,EBF4,PNCK,EN2,TSPYL2,KLHL4,ZCCHC18,SAMD14,MORF4L2,SMC4,TFAP2A,TBKBP1,BEX1,MAGED1,PSME1,COL5A3,SKOR1,DPYSL5,ANAPC5,WDR6,SKAP2,HSP90AA1,RAB34,SMARCA1,FAF1,TRMT2B,SOX3,HSP90AB1,HSDL1,CCT3,GRB10,CD200,DPYSL3,APEH,SNCAIP,ZMAT1,REM2,SEC24D,RSRP1,PRPS1L3,NFYA,WDR41,NINJ1,SRSF2,BBS2,PODXL2,CD99L2,TUFT1,GKAP1,GPI1,STK3,ORC3,HS6ST2,TAOK3,BEX4,NAGK,CORO1C,NRBP…
TF	Factor: SP2; motif: GNNGGGGGCGGGGSN	TF:M03807	9.58743e-10	9.0183	7111	663	303	21833	ONECUT2,SFMBT2,TWIST1,ECE2,PAX2,LGALS8,GPRASP2,RIMKLB,SLC29A4,EMID1,EBF4,PNCK,GDI1,ZFP503,PNMA3,TSPYL2,ZCCHC18,ACOT7,DYNC1I1,SAMD14,PAFAH1B3,MORF4L2,DGKA,SMC4,TFAP2A,TBKBP1,BEX1,SCAPER,COL5A3,SKOR1,DPYSL5,ANAPC5,WDR6,SKAP2,ARXES2,HSP90AA1,RAB34,TMEM117,RANBP17,SMARCA1,FAF1,TRMT2B,PRMT2,SOX3,HSP90AB1,CCT3,GRB10,CD200,RDX,DPYSL3,APEH,SNCAIP,MACROD1,ZMAT1,SEC24D,ACHE,PRPS1L3,NFYA,WDR41,NT5E,IRX5,SRS…
TF	Factor: BTEB2; motif: RGGGNGKGGN	TF:M07277	1.06839e-09	8.97127	7609	663	319	21833	ONECUT2,SFMBT2,ECE2,GPRASP1,PAX2,LGALS8,RIMKLB,USP11,SLC29A4,EMID1,EBF4,PNCK,GDI1,EN2,ZFP503,PNMA3,TSPYL2,ACOT7,SAMD14,PAFAH1B3,MORF4L2,DGKA,TFAP2A,TBKBP1,MAGED1,SCAPER,COL5A3,SKOR1,DPYSL5,ANAPC5,WDR6,SKAP2,ARXES2,SRSF5,HSP90AA1,EEF1A1,RAB34,TMEM117,SMARCA1,FAF1,TRMT2B,SOX3,HSP90AB1,CCT3,CD200,RDX,DPYSL3,APEH,MMAB,MACROD1,ZMAT1,REM2,SEC24D,ACHE,PRPS1L3,NFYA,WDR41,NT5E,IRX5,SRSF2,BBS2,ZFP157,CD99L…
TF	Factor: TEL1; motif: CNCGGAANNN	TF:M01993	1.32548e-09	8.87763	10449	663	407	21833	ONECUT2,TWIST1,ECE2,PAX2,LGALS8,USP11,ASL,EMID1,EBF4,OPTN,NDN,GAP43,CDH18,TUBB2A,TSPYL2,ASH2L,ZCCHC18,ZSCAN18,SAMD14,MORF4L2,CCDC39,DGKA,ARL10,SMC4,BEX1,PSME1,COL5A3,SKOR1,DPYSL5,GSPT2,WDR6,SKAP2,ARXES2,SRSF5,EEF1A1,RAB34,TMEM117,SMARCA1,HSP90AB1,HSDL1,CCT3,GRB10,CD200,DPYSL3,ZFP28,APEH,ELAC1,STIL,SAT2,MMAB,ZMAT1,SEC24D,ACHE,PRPS1L3,CGREF1,NFYA,WDR41,STAT6,NINJ1,SRSF2,BBS2,RRAGB,CDC45,HSD17B11,PR…
TF	Factor: Klf17; motif: NGGGCGG	TF:M05407	2.82949e-09	8.54829	6561	663	283	21833	SFMBT2,ECE2,GPRASP1,PAX2,GPRASP2,ASL,SLC29A4,EMID1,PNCK,GDI1,TUBB2A,TSPYL2,DYNC1I1,PAFAH1B3,MORF4L2,DGKA,TFAP2A,TBKBP1,BEX1,MAGED1,PSME1,SKOR1,ANAPC5,WDR6,SKAP2,ARXES2,SRSF5,HSP90AA1,RAB34,RANBP17,EIF2S3Y,PRMT2,SOX3,HSP90AB1,HSDL1,GRB10,CD200,DPYSL3,MMAB,MACROD1,SEC24D,ACHE,CGREF1,NFYA,NT5E,STAT6,NINJ1,IRX5,SRSF2,RRAGB,ZFP157,PODXL2,CD99L2,TUFT1,SAMHD1,TSPYL3,GKAP1,STK3,ORC3,CYB5R1,TAOK3,RNF25,BE…
TF	Factor: ZBP89; motif: CCCCKCCCCCNN	TF:M07397	3.15002e-09	8.50169	8105	663	333	21833	ONECUT2,SFMBT2,TWIST1,ECE2,PAX2,RIMKLB,EMID1,EBF4,PNCK,GDI1,EN2,OPTN,ZFP503,PNMA3,ASH2L,KLHL4,ZCCHC18,ZSCAN18,SAMD14,PAFAH1B3,MORF4L2,SMC4,TFAP2A,TBKBP1,BEX1,MAGED1,SCAPER,COL5A3,SKOR1,DPYSL5,ANAPC5,WDR6,ARXES2,EEF1A1,RAB34,FKBP14,SMARCA1,FAF1,TRMT2B,HSP90AB1,CCT3,GRB10,CD200,DPYSL3,APEH,SNCAIP,SAT2,ZMAT1,REM2,SEC24D,PRPS1L3,NFYA,WDR41,NT5E,STAT6,SRSF2,BBS2,RIT2,CD99L2,HSD17B11,ARMCX4,TUFT1,TSPYL…
TF	Factor: GKLF; motif: NNNRNWGGGTGKGGC	TF:M10279	9.07072e-09	8.04236	9314	663	369	21833	ONECUT2,SFMBT2,TWIST1,ECE2,GPRASP1,LGALS8,GPRASP2,RIMKLB,USP11,SLC29A4,EBF4,PNCK,GDI1,OPTN,ZFP503,PNMA3,GAP43,TUBB2A,TSPYL2,ASH2L,ACOT7,DYNC1I1,ZSCAN18,SAMD14,PAFAH1B3,MORF4L2,DGKA,ARL10,TFAP2A,MAGED1,SCAPER,COL5A3,SKOR1,DPYSL5,ANAPC5,WDR6,SKAP2,HSP90AA1,EEF1A1,TMEM117,RANBP17,SMARCA1,FAF1,EIF2S3Y,TRMT2B,PRMT2,HSP90AB1,HSDL1,CCT3,GRB10,DPYSL3,ZFP28,APEH,SAT2,MACROD1,ZMAT1,REM2,SEC24D,ACHE,PRPS1L3…
TF	Factor: Foxn1; motif: RGAMGC	TF:M12470	9.22137e-09	8.0352	9738	663	382	21833	SFMBT2,TWIST1,GPRASP1,LGALS8,RIMKLB,USP11,SLC29A4,EMID1,EBF4,GDI1,EN2,ZFP503,CDH18,TSPYL2,ZSCAN18,SAMD14,PAFAH1B3,DGKA,ARL10,SMC4,TFAP2A,MAGED1,SCAPER,COL5A3,SKOR1,DPYSL5,ANAPC5,WDR6,SKAP2,ARXES2,SRSF5,EEF1A1,RAB34,TMEM117,RANBP17,FKBP14,FAF1,PRMT2,SOX3,HSP90AB1,HSDL1,GRB10,CD200,RDX,SNCAIP,ELAC1,ZMAT1,SEC24D,RSRP1,PRPS1L3,NFYA,WDR41,NT5E,STAT6,NINJ1,SRSF2,RRAGB,ZFP157,CDC45,CD99L2,ARMCX4,TUFT1,S…
TF	Factor: E2F-3; motif: GGCGGGN; match class: 1	TF:M02089_1	1.18277e-08	7.9271	6910	663	292	21833	ONECUT2,SFMBT2,TWIST1,ECE2,PAX2,LGALS8,RIMKLB,SLC29A4,EMID1,EBF4,PNCK,GDI1,EN2,OPTN,PNMA3,TSPYL2,ZCCHC18,ACOT7,SAMD14,MORF4L2,DGKA,SMC4,TFAP2A,TBKBP1,MAGED1,PSME1,SCAPER,COL5A3,DPYSL5,ANAPC5,SKAP2,SRSF5,HSP90AA1,EEF1A1,RAB34,TMEM117,SMARCA1,FAF1,TRMT2B,SOX3,HSP90AB1,CCT3,GRB10,CD200,DPYSL3,ZFP28,APEH,SNCAIP,MMAB,MACROD1,ZMAT1,SEC24D,ACHE,PRPS1L3,WDR41,NT5E,SRSF2,ZFP157,CD99L2,TUFT1,MSTO1,RHOU,GKA…
TF	Factor: KLF3; motif: NNNNNNGGGCGGGGCNNGN	TF:M10278	1.39026e-08	7.8569	7348	663	306	21833	ONECUT2,SFMBT2,TWIST1,PAX2,LGALS8,GPRASP2,RIMKLB,SLC29A4,EMID1,EBF4,PNCK,GDI1,PNMA3,TSPYL2,ZCCHC18,ACOT7,DYNC1I1,SAMD14,PAFAH1B3,MORF4L2,DGKA,TFAP2A,TBKBP1,SCAPER,COL5A3,ANAPC5,WDR6,SKAP2,ARXES2,SRSF5,HSP90AA1,EEF1A1,TMEM117,RANBP17,SMARCA1,FAF1,EIF2S3Y,TRMT2B,PRMT2,SOX3,HSP90AB1,CCT3,GRB10,CD200,RDX,APEH,SNCAIP,MMAB,ZMAT1,SEC24D,ACHE,PRPS1L3,NFYA,WDR41,NT5E,STAT6,SRSF2,BBS2,RRAGB,ZFP157,PODXL2,C…
TF	Factor: CPBP; motif: SNCCCNN; match class: 1	TF:M01822_1	2.33069e-08	7.63252	19940	663	647	21833	ONECUT2,SFMBT2,TWIST1,FHL1,ECE2,GPRASP1,PAX2,LGALS8,GPRASP2,RIMKLB,USP11,ASL,SLC29A4,EMID1,EBF4,PNCK,GDI1,EN2,OPTN,ZFP503,PNMA3,GAP43,CDH18,TUBB2A,TSPYL2,ASH2L,KLHL4,ZCCHC18,ACOT7,NRIP2,DYNC1I1,ZSCAN18,SAMD14,PAFAH1B3,MORF4L2,CCDC39,DGKA,ARL10,SMC4,TFAP2A,TBKBP1,BEX1,UCMA,MAGED1,PSME1,SCAPER,COL5A3,SKOR1,DPYSL5,ANAPC5,GSPT2,WDR6,SKAP2,ARXES2,SRSF5,HSP90AA1,EEF1A1,RAB34,TMEM117,RANBP17,FKBP14,SMAR…
TF	Factor: BCL6B; motif: NNNNCCGCCCCWNNNN; match class: 1	TF:M02844_1	2.90457e-08	7.53692	8549	663	343	21833	ONECUT2,SFMBT2,FHL1,ECE2,GPRASP1,GPRASP2,RIMKLB,USP11,ASL,SLC29A4,EMID1,EBF4,PNCK,GDI1,EN2,OPTN,ZFP503,PNMA3,TUBB2A,TSPYL2,ASH2L,ZCCHC18,ACOT7,SAMD14,PAFAH1B3,MORF4L2,DGKA,SMC4,TBKBP1,MAGED1,SCAPER,SKOR1,DPYSL5,GSPT2,WDR6,SKAP2,ARXES2,HSP90AA1,EEF1A1,RAB34,RANBP17,SMARCA1,EIF2S3Y,PRMT2,SOX3,HSP90AB1,HSDL1,CCT3,GRB10,RDX,APEH,SNCAIP,ELAC1,SAT2,MMAB,MACROD1,ZMAT1,ACHE,PRPS1L3,NFYA,NT5E,NINJ1,SRSF2,…
TF	Factor: IRF4; motif: NNNAYTCTCGGWNNN	TF:M02872	2.99069e-08	7.52423	14562	663	519	21833	ONECUT2,SFMBT2,PAX2,RIMKLB,USP11,SLC29A4,EMID1,EBF4,PNCK,EN2,OPTN,NDN,ZFP503,PNMA3,GAP43,TUBB2A,TSPYL2,ASH2L,KLHL4,NRIP2,DYNC1I1,ZSCAN18,SAMD14,PAFAH1B3,MORF4L2,CCDC39,DGKA,ARL10,SMC4,TFAP2A,TBKBP1,BEX1,UCMA,MAGED1,SCAPER,COL5A3,SKOR1,DPYSL5,GSPT2,WDR6,SKAP2,SRSF5,EEF1A1,RANBP17,SMARCA1,FAF1,EIF2S3Y,TRMT2B,PRMT2,SOX3,HSP90AB1,HSDL1,CCT3,GRB10,CD200,DPYSL3,ZFP28,SNCAIP,ELAC1,STIL,SAT2,MACROD1,REM2…
TF	Factor: Sp2; motif: NYSGCCCCGCCCCCY	TF:M03567	4.03616e-08	7.39403	6432	663	274	21833	ONECUT2,SFMBT2,PAX2,LGALS8,GPRASP2,RIMKLB,SLC29A4,EMID1,EBF4,PNCK,GDI1,PNMA3,TSPYL2,ZCCHC18,ACOT7,DYNC1I1,SAMD14,PAFAH1B3,MORF4L2,DGKA,SMC4,TFAP2A,TBKBP1,MAGED1,SCAPER,COL5A3,SKOR1,DPYSL5,ANAPC5,WDR6,SKAP2,HSP90AA1,TMEM117,RANBP17,SMARCA1,FAF1,TRMT2B,SOX3,HSP90AB1,CCT3,GRB10,CD200,RDX,DPYSL3,APEH,SNCAIP,MACROD1,ZMAT1,SEC24D,ACHE,PRPS1L3,NFYA,WDR41,NT5E,IRX5,SRSF2,BBS2,RRAGB,ZFP157,CD99L2,TUFT1,MS…
TF	Factor: GKLF; motif: NNNRGGNGNGGSN; match class: 1	TF:M07289_1	4.98919e-08	7.30197	11003	663	417	21833	ONECUT2,SFMBT2,TWIST1,FHL1,ECE2,GPRASP1,PAX2,LGALS8,GPRASP2,RIMKLB,USP11,SLC29A4,EMID1,EBF4,PNCK,GDI1,EN2,OPTN,ZFP503,PNMA3,GAP43,TUBB2A,TSPYL2,ASH2L,ZCCHC18,ACOT7,DYNC1I1,ZSCAN18,SAMD14,PAFAH1B3,MORF4L2,CCDC39,DGKA,SMC4,TFAP2A,TBKBP1,BEX1,MAGED1,SCAPER,COL5A3,SKOR1,DPYSL5,ANAPC5,WDR6,SKAP2,ARXES2,SRSF5,HSP90AA1,EEF1A1,TMEM117,RANBP17,FKBP14,SMARCA1,FAF1,TRMT2B,SOX3,HSP90AB1,HSDL1,CCT3,GRB10,DPYS…
TF	Factor: Sp1; motif: GGGGCGGGGT	TF:M00008	9.44811e-08	7.02466	8366	663	335	21833	ONECUT2,TWIST1,ECE2,LGALS8,RIMKLB,ASL,SLC29A4,EBF4,PNCK,GDI1,OPTN,PNMA3,GAP43,TSPYL2,ACOT7,SAMD14,PAFAH1B3,DGKA,ARL10,SMC4,TBKBP1,MAGED1,PSME1,SCAPER,COL5A3,DPYSL5,ANAPC5,SKAP2,SRSF5,HSP90AA1,RAB34,TMEM117,SMARCA1,FAF1,EIF2S3Y,TRMT2B,SOX3,HSP90AB1,CCT3,GRB10,ZFP28,APEH,SNCAIP,MMAB,MACROD1,ZMAT1,SEC24D,ACHE,PRPS1L3,NFYA,WDR41,NT5E,SRSF2,BBS2,ZFP157,CD99L2,HSD17B11,PRR13,TUFT1,SAMHD1,RHOU,GKAP1,GPI…
TF	Factor: IRF4; motif: NNNAYTCTCGGWNNN; match class: 1	TF:M02872_1	9.45528e-08	7.02433	8145	663	328	21833	ONECUT2,PAX2,RIMKLB,EMID1,EN2,OPTN,ZFP503,PNMA3,TUBB2A,TSPYL2,ASH2L,MORF4L2,ARL10,SMC4,TFAP2A,TBKBP1,UCMA,SCAPER,COL5A3,DPYSL5,GSPT2,SKAP2,SRSF5,EEF1A1,SMARCA1,FAF1,EIF2S3Y,SOX3,HSDL1,CCT3,GRB10,CD200,DPYSL3,ZFP28,SNCAIP,ELAC1,SAT2,MACROD1,ACHE,NFYA,WDR41,NT5E,STAT6,IRX5,SRSF2,CDC45,RIT2,CD99L2,HSD17B11,ARMCX4,PRR13,MSTO1,TSPYL3,RHOU,GKAP1,OTOGL,GPI1,ORC3,CYB5R1,DUS2,HS6ST2,TAOK3,RNF25,BEX4,TMEM4…
TF	Factor: CACD; motif: CCACRCCC; match class: 1	TF:M01113_1	1.09448e-07	6.96079	4465	663	205	21833	ONECUT2,SFMBT2,TWIST1,LGALS8,RIMKLB,USP11,SLC29A4,PNCK,OPTN,PNMA3,GAP43,TSPYL2,ASH2L,ACOT7,DYNC1I1,PAFAH1B3,MORF4L2,TFAP2A,MAGED1,COL5A3,DPYSL5,SKAP2,SRSF5,RAB34,TMEM117,FAF1,PRMT2,HSP90AB1,GRB10,ZFP28,SNCAIP,SAT2,MACROD1,ZMAT1,RSRP1,NFYA,CTXN3,STAT6,IRX5,RIT2,CD99L2,TUFT1,SAMHD1,CYB5R1,TAOK3,RNF25,NAGK,ADAM15,CORO1C,DLX4,VBP1,SUV39H1,PGRMC1,SYNGR3,LTA4H,IZUMO4,TCEAL3,COX20,PABPN1,DMRT2,CHL1,MLH3…
TF	Factor: IRF6; motif: NNNACTCYCGGKNNN	TF:M02874	1.34653e-07	6.87078	13421	663	485	21833	ONECUT2,SFMBT2,TWIST1,PAX2,LGALS8,GPRASP2,RIMKLB,USP11,EMID1,EBF4,PNCK,EN2,OPTN,NDN,ZFP503,PNMA3,GAP43,CDH18,TUBB2A,TSPYL2,ASH2L,KLHL4,NRIP2,SAMD14,PAFAH1B3,MORF4L2,DGKA,ARL10,SMC4,TFAP2A,TBKBP1,UCMA,MAGED1,SCAPER,COL5A3,DPYSL5,GSPT2,WDR6,SKAP2,SRSF5,HSP90AA1,EEF1A1,RAB34,TMEM117,RANBP17,FKBP14,SMARCA1,FAF1,EIF2S3Y,PRMT2,SOX3,HSP90AB1,HSDL1,CCT3,CD200,RDX,DPYSL3,ZFP28,SNCAIP,ELAC1,SAT2,MMAB,MACRO…
TF	Factor: Pax-4; motif: NNNNNYCACCCB; match class: 1	TF:M00378_1	1.36329e-07	6.86541	14471	663	514	21833	ONECUT2,SFMBT2,TWIST1,FHL1,ECE2,GPRASP1,PAX2,LGALS8,GPRASP2,RIMKLB,USP11,SLC29A4,EMID1,EBF4,PNCK,GDI1,EN2,OPTN,ZFP503,PNMA3,GAP43,CDH18,TUBB2A,TSPYL2,ASH2L,ZCCHC18,ACOT7,NRIP2,ZSCAN18,SAMD14,PAFAH1B3,MORF4L2,CCDC39,DGKA,ARL10,TFAP2A,TBKBP1,BEX1,UCMA,MAGED1,PSME1,SCAPER,SKOR1,DPYSL5,ANAPC5,GSPT2,WDR6,SKAP2,ARXES2,HSP90AA1,EEF1A1,RAB34,TMEM117,FKBP14,SMARCA1,FAF1,EIF2S3Y,SOX3,HSP90AB1,HSDL1,CCT3,GR…
TF	Factor: GKLF; motif: NNNRNWGGGTGKGGC; match class: 1	TF:M10279_1	1.6789e-07	6.77498	3456	663	168	21833	GPRASP1,LGALS8,RIMKLB,USP11,SLC29A4,EBF4,GDI1,PNMA3,GAP43,TSPYL2,ACOT7,DYNC1I1,PAFAH1B3,MORF4L2,SCAPER,WDR6,SKAP2,EEF1A1,TMEM117,EIF2S3Y,PRMT2,DPYSL3,ZFP28,APEH,MACROD1,ZMAT1,SEC24D,STAT6,SRSF2,ARMCX4,PRR13,TUFT1,GKAP1,CYB5R1,RNF25,NAGK,CENPC1,ADAM15,CORO1C,NRBP1,CREB3L3,SUV39H1,PGRMC1,MAGED2,IZUMO4,COX20,TCP11L2,MAPK3,FCHSD1,INPP5F,RNF2,TELO2,PHF1,FPGS,HDAC1,VASP,TRO,HCN3,NELFB,TPPP3,MAST1,KIZ,P…
TF	Factor: Sp1; motif: NGGGGGCGGGGYN; match class: 1	TF:M00196_1	2.52439e-07	6.59784	4251	663	196	21833	ONECUT2,SFMBT2,TWIST1,LGALS8,RIMKLB,SLC29A4,EMID1,EBF4,PNCK,GDI1,PNMA3,TSPYL2,ZCCHC18,ACOT7,SAMD14,MORF4L2,DGKA,TFAP2A,SCAPER,COL5A3,DPYSL5,ANAPC5,WDR6,SKAP2,HSP90AA1,RAB34,TMEM117,SMARCA1,FAF1,SOX3,HSP90AB1,CCT3,DPYSL3,APEH,SNCAIP,MACROD1,ZMAT1,ACHE,PRPS1L3,WDR41,NT5E,NINJ1,SRSF2,ZFP157,CD99L2,TUFT1,GKAP1,GPI1,STK3,ADAM15,DPP7,CORO1C,NRBP1,DLX4,RRM2B,SUV39H1,PGRMC1,HAUS4,SYNGR3,MAGED2,IZUMO4,AHS…
TF	Factor: GKLF; motif: GCCMCRCCCNNN; match class: 1	TF:M01588_1	7.93025e-07	6.10071	2983	663	148	21833	LGALS8,RIMKLB,USP11,SLC29A4,EBF4,GDI1,PNMA3,ACOT7,SAMD14,PAFAH1B3,SCAPER,COL5A3,ANAPC5,WDR6,SKAP2,HSP90AA1,EEF1A1,TMEM117,EIF2S3Y,PRMT2,HSP90AB1,GRB10,ZFP28,APEH,ZMAT1,SEC24D,PRPS1L3,NFYA,WDR41,STAT6,SRSF2,ARMCX4,TUFT1,GKAP1,STK3,RNF25,CENPC1,ADAM15,CORO1C,NRBP1,RRM2B,SUV39H1,PGRMC1,HAUS4,SYNGR3,MAGED2,IZUMO4,AHSA2,MAPK3,FCHSD1,INPP5F,PHF1,FPGS,HDAC1,VASP,TRO,HCN3,MAST1,KIZ,PRDX3,AIFM2,CCT2,SLC25…
TF	Factor: GKLF; motif: NNNRGGNGNGGSN	TF:M07289	8.32925e-07	6.07939	15327	663	534	21833	ONECUT2,SFMBT2,TWIST1,FHL1,ECE2,GPRASP1,PAX2,LGALS8,GPRASP2,RIMKLB,USP11,SLC29A4,EMID1,EBF4,PNCK,GDI1,EN2,OPTN,ZFP503,PNMA3,GAP43,CDH18,TUBB2A,TSPYL2,ASH2L,KLHL4,ZCCHC18,ACOT7,DYNC1I1,ZSCAN18,SAMD14,PAFAH1B3,MORF4L2,CCDC39,DGKA,SMC4,TFAP2A,TBKBP1,BEX1,MAGED1,SCAPER,COL5A3,SKOR1,DPYSL5,ANAPC5,WDR6,SKAP2,ARXES2,SRSF5,HSP90AA1,EEF1A1,RAB34,TMEM117,RANBP17,FKBP14,SMARCA1,FAF1,EIF2S3Y,TRMT2B,PRMT2,SOX…
TF	Factor: Sp1; motif: NGGGGCGGGGN; match class: 1	TF:M07395_1	9.0478e-07	6.04346	4542	663	204	21833	ONECUT2,SFMBT2,TWIST1,PAX2,LGALS8,RIMKLB,SLC29A4,EMID1,EBF4,PNCK,GDI1,PNMA3,TSPYL2,ZCCHC18,ACOT7,SAMD14,MORF4L2,DGKA,TFAP2A,TBKBP1,SCAPER,COL5A3,DPYSL5,ANAPC5,SKAP2,HSP90AA1,RAB34,TMEM117,SMARCA1,FAF1,HSP90AB1,CCT3,DPYSL3,APEH,SNCAIP,MACROD1,ZMAT1,ACHE,PRPS1L3,WDR41,NT5E,NINJ1,SRSF2,ZFP157,CD99L2,TUFT1,GKAP1,GPI1,STK3,ADAM15,CORO1C,NRBP1,DLX4,RRM2B,SUV39H1,PGRMC1,HAUS4,SYNGR3,MAGED2,FAM219B,IZUMO…
TF	Factor: Pax-5; motif: RRMSWGANWYCTNRAGCGKRACSRYNSM	TF:M00144	9.1069e-07	6.04063	12008	663	441	21833	ONECUT2,SFMBT2,ECE2,PAX2,RIMKLB,ASL,SLC29A4,EMID1,EBF4,PNCK,GDI1,EN2,OPTN,ZFP503,PNMA3,GAP43,TSPYL2,ACOT7,NRIP2,DYNC1I1,SAMD14,PAFAH1B3,MORF4L2,CCDC39,DGKA,SMC4,TFAP2A,TBKBP1,BEX1,MAGED1,PSME1,SCAPER,COL5A3,SKOR1,DPYSL5,ANAPC5,WDR6,SKAP2,ARXES2,SRSF5,HSP90AA1,EEF1A1,RAB34,RANBP17,SMARCA1,FAF1,EIF2S3Y,PRMT2,SOX3,HSP90AB1,HSDL1,CCT3,GRB10,ZFP28,APEH,SNCAIP,STIL,SAT2,MACROD1,ZMAT1,REM2,SEC24D,RSRP1,…
TF	Factor: Hes1; motif: NNCACGYGNN	TF:M07991	9.18297e-07	6.03702	15521	663	539	21833	ONECUT2,SFMBT2,TWIST1,FHL1,ECE2,GPRASP1,PAX2,LGALS8,GPRASP2,RIMKLB,USP11,ASL,RGS13,SLC29A4,EMID1,EBF4,PNCK,EN2,OPTN,ZFP503,PNMA3,GAP43,CDH18,TUBB2A,TSPYL2,ASH2L,KLHL4,ZCCHC18,ACOT7,NRIP2,DYNC1I1,ZSCAN18,SAMD14,PAFAH1B3,MORF4L2,CCDC39,DGKA,ARL10,SMC4,TFAP2A,TBKBP1,BEX1,MAGED1,PSME1,SCAPER,COL5A3,SKOR1,DPYSL5,ANAPC5,GSPT2,WDR6,ARXES2,SRSF5,HSP90AA1,EEF1A1,RAB34,TMEM117,RANBP17,SMARCA1,FAF1,EIF2S3Y,…
TF	Factor: ELK-1; motif: ACCGGAWRTN; match class: 1	TF:M01981_1	1.16214e-06	5.93474	9035	663	351	21833	SFMBT2,GPRASP1,PAX2,LGALS8,RIMKLB,USP11,SLC29A4,EMID1,PNCK,EN2,OPTN,PNMA3,CDH18,ASH2L,DYNC1I1,ZSCAN18,SAMD14,MORF4L2,SMC4,TBKBP1,SKOR1,DPYSL5,GSPT2,WDR6,SKAP2,SRSF5,HSP90AA1,RAB34,TMEM117,RANBP17,SMARCA1,HSP90AB1,CCT3,GRB10,ZFP28,APEH,SAT2,ZMAT1,ACHE,PRPS1L3,NFYA,STAT6,NINJ1,SRSF2,RRAGB,CDC45,ARMCX4,PRR13,TUFT1,SAMHD1,MSTO1,TSPYL3,GKAP1,GPI1,ORC3,RNF25,TMEM43,NAGK,UCKL1,CCT5,CENPC1,ADAM15,DPP7,CO…
TF	Factor: CTCF; motif: NAGGGGGCGCNNKNNNN	TF:M08995	1.18097e-06	5.92776	14354	663	507	21833	ONECUT2,SFMBT2,TWIST1,ECE2,GPRASP1,PAX2,LGALS8,GPRASP2,RIMKLB,USP11,SLC29A4,EMID1,EBF4,PNCK,GDI1,EN2,OPTN,ZFP503,PNMA3,GAP43,TUBB2A,TSPYL2,KLHL4,ZCCHC18,ACOT7,NRIP2,DYNC1I1,ZSCAN18,SAMD14,PAFAH1B3,MORF4L2,DGKA,ARL10,SMC4,TFAP2A,TBKBP1,BEX1,UCMA,MAGED1,PSME1,SCAPER,COL5A3,SKOR1,DPYSL5,ANAPC5,GSPT2,WDR6,SKAP2,ARXES2,HSP90AA1,EEF1A1,RAB34,TMEM117,RANBP17,FKBP14,SMARCA1,FAF1,TRMT2B,PRMT2,SOX3,HSP90AB…
TF	Factor: IRF6; motif: NNNACTCYCGGKNNN; match class: 1	TF:M02874_1	1.19687e-06	5.92195	7147	663	291	21833	ONECUT2,PAX2,RIMKLB,EMID1,EBF4,EN2,ZFP503,PNMA3,TUBB2A,NRIP2,MORF4L2,SMC4,TFAP2A,TBKBP1,SCAPER,WDR6,SKAP2,EEF1A1,RANBP17,FAF1,EIF2S3Y,SOX3,HSDL1,CCT3,RDX,DPYSL3,ELAC1,MACROD1,RSRP1,NFYA,NT5E,STAT6,IRX5,SRSF2,ZFP157,CDC45,HSD17B11,ARMCX4,RHOU,GPI1,STK3,ORC3,CYB5R1,HS6ST2,TAOK3,RNF25,NAGK,UCKL1,ADAM15,MID2,CORO1C,NRBP1,TMEM255A,GAA,SUV39H1,HAUS4,SYNGR3,DLX2,LTA4H,AHSA2,TCEAL3,TERF2IP,DMRT2,MAPK3,TI…
TF	Factor: SP1; motif: GGGGYGGGGNS	TF:M01303	1.87997e-06	5.72585	7175	663	291	21833	ONECUT2,TWIST1,GPRASP1,PAX2,LGALS8,RIMKLB,USP11,SLC29A4,EMID1,EBF4,PNCK,GDI1,OPTN,ZFP503,PNMA3,TSPYL2,ASH2L,ACOT7,SAMD14,PAFAH1B3,MORF4L2,DGKA,SMC4,TFAP2A,TBKBP1,MAGED1,SCAPER,SKOR1,DPYSL5,SKAP2,HSP90AA1,RAB34,SOX3,HSP90AB1,CCT3,GRB10,CD200,RDX,DPYSL3,APEH,SNCAIP,SAT2,ZMAT1,REM2,SEC24D,ACHE,PRPS1L3,NFYA,WDR41,NT5E,IRX5,SRSF2,ZFP157,PODXL2,RIT2,RHOU,GKAP1,GPI1,STK3,TAOK3,RNF25,CENPC1,ADAM15,CORO1C…
TF	Factor: Egr-3; motif: NTGCGTGGGCGK	TF:M00245	2.01632e-06	5.69544	6083	663	255	21833	ONECUT2,SFMBT2,TWIST1,RIMKLB,USP11,SLC29A4,EMID1,EBF4,PNCK,EN2,OPTN,GAP43,TSPYL2,ACOT7,DYNC1I1,ZSCAN18,PAFAH1B3,MORF4L2,DGKA,ARL10,TFAP2A,TBKBP1,BEX1,MAGED1,GSPT2,WDR6,SKAP2,ARXES2,SRSF5,EEF1A1,RAB34,TMEM117,SMARCA1,CD200,ZFP28,STIL,MMAB,MACROD1,ZMAT1,REM2,SEC24D,CGREF1,NFYA,WDR41,NT5E,STAT6,NINJ1,IRX5,SRSF2,PODXL2,PRR13,TUFT1,TSPYL3,GKAP1,STK3,BEX4,TMEM43,NAGK,CENPC1,ADAM15,CORO1C,NRBP1,DLX4,RRM…
TF	Factor: Sp1; motif: CCCCGCCCCN; match class: 1	TF:M00933_1	2.95355e-06	5.52966	4006	663	183	21833	ONECUT2,SFMBT2,TWIST1,LGALS8,RIMKLB,SLC29A4,EBF4,PNCK,GDI1,EN2,ZFP503,PNMA3,TSPYL2,ZCCHC18,ACOT7,SAMD14,PAFAH1B3,MORF4L2,DGKA,SMC4,TFAP2A,TBKBP1,SCAPER,COL5A3,DPYSL5,ANAPC5,WDR6,SKAP2,ARXES2,HSP90AA1,EEF1A1,RAB34,SMARCA1,TRMT2B,HSP90AB1,CCT3,APEH,MACROD1,ZMAT1,PRPS1L3,WDR41,NT5E,SRSF2,ZFP157,CD99L2,TUFT1,GKAP1,GPI1,STK3,CYB5R1,ADAM15,CORO1C,NRBP1,RRM2B,PGRMC1,HAUS4,MAGED2,AHSA2,TERF2IP,TCP11L2,MA…
TF	Factor: Sp1; motif: NNGGGGCGGGGNN; match class: 1	TF:M00932_1	3.14392e-06	5.50253	4378	663	196	21833	ONECUT2,SFMBT2,TWIST1,PAX2,LGALS8,RIMKLB,SLC29A4,EMID1,EBF4,PNCK,GDI1,PNMA3,TSPYL2,ZCCHC18,ACOT7,SAMD14,PAFAH1B3,MORF4L2,DGKA,TFAP2A,TBKBP1,SCAPER,COL5A3,DPYSL5,ANAPC5,SKAP2,HSP90AA1,RAB34,TMEM117,SMARCA1,FAF1,SOX3,HSP90AB1,CCT3,GRB10,APEH,SNCAIP,MMAB,MACROD1,ZMAT1,ACHE,PRPS1L3,WDR41,NT5E,SRSF2,ZFP157,CD99L2,TUFT1,RHOU,GKAP1,GPI1,STK3,ADAM15,DPP7,CORO1C,NRBP1,DLX4,RRM2B,PGRMC1,HAUS4,SYNGR3,MAGED2…
TF	Factor: E2F; motif: GGCGSG; match class: 1	TF:M00803_1	3.45273e-06	5.46184	7059	663	286	21833	ONECUT2,SFMBT2,TWIST1,ECE2,GPRASP1,PAX2,RIMKLB,SLC29A4,EMID1,EBF4,PNCK,EN2,TUBB2A,ZCCHC18,DYNC1I1,SAMD14,DGKA,ARL10,TBKBP1,BEX1,MAGED1,SCAPER,COL5A3,SKOR1,DPYSL5,ANAPC5,SKAP2,SRSF5,HSP90AA1,EEF1A1,TMEM117,RANBP17,SOX3,HSDL1,GRB10,DPYSL3,ZFP28,ELAC1,STIL,MACROD1,ZMAT1,SEC24D,RSRP1,NFYA,NINJ1,IRX5,SRSF2,RRAGB,PODXL2,CD99L2,TUFT1,RHOU,GKAP1,ORC3,DUS2,HS6ST2,TMEM43,CCT5,ADAM15,CORO1C,NRBP1,SUV39H1,PG…
TF	Factor: E2F1; motif: NNNNNGCGSSAAAN	TF:M08874	3.81556e-06	5.41844	5881	663	247	21833	SFMBT2,TWIST1,ECE2,GPRASP1,GPRASP2,USP11,EN2,ZFP503,GAP43,TUBB2A,TSPYL2,KLHL4,ACOT7,SAMD14,ARL10,BEX1,MAGED1,SCAPER,ANAPC5,WDR6,SKAP2,ARXES2,TMEM117,SMARCA1,FAF1,EIF2S3Y,TRMT2B,SOX3,HSDL1,CCT3,GRB10,CD200,DPYSL3,APEH,MACROD1,SEC24D,PRPS1L3,NFYA,WDR41,NINJ1,IRX5,SRSF2,RRAGB,PODXL2,PRR13,TUFT1,MSTO1,ORC3,CYB5R1,HS6ST2,BEX4,CORO1C,RRM2B,SUV39H1,PGRMC1,SYNGR3,AHSA2,TERF2IP,MRI1,TCP11L2,DMRT2,MAPK3,TI…
TF	Factor: E2F-1; motif: NKTSSCGC	TF:M00428	4.01422e-06	5.3964	7940	663	314	21833	ONECUT2,SFMBT2,FHL1,ECE2,GPRASP1,PAX2,GPRASP2,RIMKLB,USP11,ASL,SLC29A4,EN2,PNMA3,TSPYL2,ZCCHC18,NRIP2,ZSCAN18,SAMD14,MORF4L2,ARL10,SMC4,TFAP2A,BEX1,UCMA,MAGED1,SCAPER,COL5A3,SKOR1,DPYSL5,GSPT2,SKAP2,TMEM117,RANBP17,SMARCA1,FAF1,TRMT2B,SOX3,CCT3,GRB10,DPYSL3,ZFP28,SNCAIP,ELAC1,SAT2,MMAB,MACROD1,ZMAT1,RSRP1,PRPS1L3,CGREF1,NFYA,WDR41,NINJ1,IRX5,SRSF2,BBS2,PODXL2,ARMCX4,TUFT1,SAMHD1,MSTO1,GPI1,ORC3,A…
TF	Factor: ZBP89; motif: CCCCKCCCCCNN; match class: 1	TF:M07397_1	7.75705e-06	5.1103	3886	663	177	21833	ONECUT2,SFMBT2,TWIST1,RIMKLB,PNCK,EN2,PNMA3,ZCCHC18,SAMD14,PAFAH1B3,MORF4L2,SMC4,TFAP2A,TBKBP1,BEX1,MAGED1,COL5A3,DPYSL5,ANAPC5,ARXES2,EEF1A1,FKBP14,SMARCA1,TRMT2B,HSP90AB1,APEH,SAT2,ZMAT1,BBS2,CD99L2,TUFT1,GPI1,CYB5R1,PRSS16,DUS2,TAOK3,RNF25,CENPC1,CORO1C,MAGED2,LTA4H,AHSA2,TCEAL3,COX20,MAPK3,STK33,RNF2,TUBA1A,ST7,TRPC4,HDAC1,VASP,TRO,GPN3,HDAC2,TPPP3,MAST1,LYRM9,AIFM2,HSPA8,CKAP4,LIN28B,SGSH,KH…
TF	Factor: E2F-1; motif: NTTSGCGG	TF:M00430	8.07509e-06	5.09285	6990	663	282	21833	ONECUT2,SFMBT2,TWIST1,FHL1,PAX2,GPRASP2,RIMKLB,USP11,ASL,RGS13,EMID1,EN2,KLHL4,DYNC1I1,ZSCAN18,SAMD14,PAFAH1B3,MORF4L2,SMC4,TFAP2A,TBKBP1,BEX1,MAGED1,GSPT2,SKAP2,SRSF5,HSP90AA1,EEF1A1,TMEM117,SMARCA1,FAF1,EIF2S3Y,HSP90AB1,CCT3,RDX,ZFP28,APEH,STIL,MACROD1,ZMAT1,RSRP1,PRPS1L3,NFYA,NT5E,STAT6,IRX5,SRSF2,CDC45,MSTO1,GKAP1,STK3,ORC3,DUS2,HS6ST2,BEX4,MAOA,ADAM15,CORO1C,DLX4,PGRMC1,SYNGR3,DLX2,PRIM1,IZU…
TF	Factor: E2F-4; motif: GCGGGAAANA; match class: 1	TF:M02090_1	9.21457e-06	5.03552	4724	663	206	21833	ONECUT2,SFMBT2,TWIST1,SLC29A4,EBF4,EN2,ZFP503,GAP43,TSPYL2,SAMD14,ARL10,BEX1,MAGED1,PSME1,SCAPER,SKAP2,EEF1A1,TMEM117,RANBP17,SMARCA1,FAF1,EIF2S3Y,SOX3,HSDL1,APEH,SNCAIP,ELAC1,SEC24D,RSRP1,PRPS1L3,NFYA,NT5E,IRX5,SRSF2,TUFT1,TSPYL3,GKAP1,STK3,ORC3,CYB5R1,BEX4,TMEM43,NAGK,CCT5,SUV39H1,SYNGR3,DLX2,LTA4H,IZUMO4,TERF2IP,TIA1,INPP5F,RNF2,TUBA1A,TELO2,ST7,PRPSAP1,TRO,SIM1,HDAC2,TPPP3,KIZ,PRDX3,HSPA8,261…
TF	Factor: GKLF; motif: NNRRGRRNGNSNNN	TF:M07040	9.93894e-06	5.00266	12970	663	464	21833	ONECUT2,SFMBT2,TWIST1,FHL1,ECE2,GPRASP1,PAX2,GPRASP2,RIMKLB,USP11,ASL,SLC29A4,EMID1,EBF4,PNCK,GDI1,EN2,OPTN,ZFP503,PNMA3,TUBB2A,TSPYL2,ASH2L,KLHL4,ZCCHC18,ACOT7,ZSCAN18,SAMD14,PAFAH1B3,MORF4L2,ARL10,SMC4,TFAP2A,TBKBP1,BEX1,MAGED1,SCAPER,COL5A3,SKOR1,DPYSL5,ANAPC5,WDR6,ARXES2,SRSF5,HSP90AA1,EEF1A1,RAB34,RANBP17,FKBP14,SMARCA1,TRMT2B,PRMT2,SOX3,HSP90AB1,HSDL1,CCT3,GRB10,DPYSL3,ZFP28,APEH,SNCAIP,ELA…
TF	Factor: Elk-1; motif: NNNNCCGGAARTNN	TF:M00025	1.26412e-05	4.89821	9847	663	371	21833	TWIST1,GPRASP1,PAX2,LGALS8,USP11,ASL,SLC29A4,EMID1,EN2,OPTN,NDN,ASH2L,ACOT7,NRIP2,SAMD14,PAFAH1B3,SMC4,SCAPER,DPYSL5,GSPT2,SKAP2,SRSF5,HSP90AA1,RAB34,SMARCA1,PRMT2,HSP90AB1,CCT3,RDX,DPYSL3,ZFP28,APEH,ELAC1,STIL,SAT2,ZMAT1,SEC24D,ACHE,PRPS1L3,NFYA,WDR41,STAT6,NINJ1,SRSF2,BBS2,RRAGB,CDC45,CD99L2,PRR13,SAMHD1,MSTO1,RHOU,GKAP1,GPI1,ORC3,RNF25,TMEM43,NAGK,UCKL1,CCT5,CENPC1,ADAM15,DPP7,CORO1C,NRBP1,DLX…
TF	Factor: GABP-alpha; motif: CTTCCK	TF:M01660	1.38414e-05	4.85882	10778	663	399	21833	ONECUT2,SFMBT2,TWIST1,GPRASP1,RIMKLB,USP11,ASL,SLC29A4,EMID1,EN2,OPTN,NDN,GAP43,TUBB2A,ASH2L,ZCCHC18,ACOT7,ZSCAN18,SAMD14,PAFAH1B3,DGKA,MAGED1,SCAPER,SKOR1,DPYSL5,ANAPC5,GSPT2,WDR6,SKAP2,ARXES2,SRSF5,HSP90AA1,EEF1A1,SMARCA1,FAF1,PRMT2,HSP90AB1,HSDL1,CCT3,GRB10,RDX,ZFP28,APEH,ELAC1,STIL,MMAB,MACROD1,REM2,SEC24D,ACHE,PRPS1L3,CGREF1,NFYA,WDR41,NINJ1,BBS2,RRAGB,ZFP157,CDC45,HSD17B11,PRR13,TUFT1,MSTO1…
TF	Factor: E2F-1; motif: TTTSGCGS	TF:M00431	1.56877e-05	4.80444	5997	663	248	21833	FHL1,ECE2,GPRASP1,GPRASP2,USP11,ASL,EN2,ZFP503,PNMA3,TSPYL2,NRIP2,ZSCAN18,SAMD14,ARL10,SMC4,BEX1,MAGED1,SCAPER,ANAPC5,WDR6,SKAP2,SRSF5,TMEM117,RANBP17,SMARCA1,FAF1,TRMT2B,SOX3,HSP90AB1,CCT3,ZFP28,APEH,MACROD1,ZMAT1,PRPS1L3,NFYA,WDR41,NINJ1,IRX5,SRSF2,CDC45,ARMCX4,PRR13,TUFT1,MSTO1,GPI1,ORC3,HS6ST2,BEX4,MAOA,ADAM15,CORO1C,TMEM255A,SUV39H1,PGRMC1,SYNGR3,RAB27A,DLX2,FAM219B,IZUMO4,AHSA2,TERF2IP,MRI1…
TF	Factor: Hes1; motif: NNCACGYGNN; match class: 1	TF:M07991_1	1.62162e-05	4.79005	11393	663	417	21833	ONECUT2,SFMBT2,TWIST1,FHL1,LGALS8,RIMKLB,USP11,ASL,RGS13,SLC29A4,EMID1,EBF4,PNCK,EN2,ZFP503,PNMA3,TUBB2A,ASH2L,KLHL4,ZCCHC18,DYNC1I1,ZSCAN18,PAFAH1B3,MORF4L2,DGKA,ARL10,TFAP2A,TBKBP1,BEX1,SCAPER,COL5A3,SKOR1,DPYSL5,ANAPC5,GSPT2,WDR6,ARXES2,SRSF5,HSP90AA1,EEF1A1,RAB34,TMEM117,RANBP17,SMARCA1,FAF1,EIF2S3Y,TRMT2B,SOX3,HSP90AB1,HSDL1,CCT3,GRB10,CD200,ZFP28,APEH,ELAC1,MACROD1,SEC24D,ACHE,RSRP1,PRPS1L3…
TF	Factor: E2F-4; motif: NTTTCSCGCC	TF:M07380	1.62446e-05	4.78929	10590	663	393	21833	ONECUT2,SFMBT2,TWIST1,ECE2,GPRASP1,PAX2,GPRASP2,RIMKLB,USP11,SLC29A4,EBF4,PNCK,EN2,OPTN,ZFP503,TUBB2A,TSPYL2,ASH2L,KLHL4,ZCCHC18,ACOT7,SAMD14,PAFAH1B3,MORF4L2,SMC4,TFAP2A,TBKBP1,BEX1,MAGED1,PSME1,SCAPER,SKOR1,DPYSL5,ANAPC5,GSPT2,WDR6,SKAP2,HSP90AA1,RAB34,TMEM117,RANBP17,SMARCA1,FAF1,EIF2S3Y,TRMT2B,SOX3,HSDL1,CCT3,GRB10,DPYSL3,APEH,SNCAIP,STIL,SAT2,MACROD1,ZMAT1,REM2,SEC24D,RSRP1,PRPS1L3,NFYA,WDR4…
TF	Factor: E2F; motif: TTTSGCGSG	TF:M00939	2.00993e-05	4.69682	5474	663	230	21833	FHL1,ECE2,GPRASP1,LGALS8,GPRASP2,USP11,EMID1,EN2,TUBB2A,TSPYL2,ZCCHC18,ACOT7,NRIP2,DYNC1I1,SAMD14,MORF4L2,ARL10,TBKBP1,MAGED1,GSPT2,SKAP2,SRSF5,HSP90AA1,RAB34,RANBP17,SMARCA1,FAF1,TRMT2B,HSP90AB1,CCT3,ZFP28,MACROD1,ZMAT1,PRPS1L3,NFYA,STAT6,NINJ1,IRX5,SRSF2,CDC45,ARMCX4,TUFT1,MSTO1,GKAP1,GPI1,ORC3,HS6ST2,ADAM15,CORO1C,TMEM255A,SYNGR3,RAB27A,DLX2,FAM219B,PRIM1,IZUMO4,AHSA2,TERF2IP,TCP11L2,DMRT2,CHL…
TF	Factor: PEA3; motif: RCCGGAAGYN	TF:M01991	2.16841e-05	4.66386	9984	663	374	21833	ONECUT2,GPRASP1,PAX2,LGALS8,RIMKLB,USP11,ASL,SLC29A4,EMID1,EN2,OPTN,NDN,ASH2L,ACOT7,NRIP2,SAMD14,PAFAH1B3,MORF4L2,SMC4,SCAPER,DPYSL5,ANAPC5,GSPT2,WDR6,SRSF5,HSP90AA1,RAB34,SMARCA1,PRMT2,HSP90AB1,HSDL1,CCT3,RDX,ZFP28,APEH,ELAC1,STIL,SAT2,ACHE,RSRP1,PRPS1L3,NFYA,WDR41,STAT6,NINJ1,SRSF2,BBS2,RRAGB,CDC45,CD99L2,PRR13,TUFT1,SAMHD1,MSTO1,TSPYL3,GKAP1,GPI1,STK3,ORC3,RNF25,NAGK,UCKL1,CCT5,CENPC1,ADAM15,D…
TF	Factor: E2F; motif: NCSCGCSAAAN	TF:M00919	2.35178e-05	4.6286	5217	663	221	21833	FHL1,ECE2,GPRASP1,LGALS8,GPRASP2,USP11,EMID1,EN2,TUBB2A,TSPYL2,ZCCHC18,NRIP2,DYNC1I1,SAMD14,MORF4L2,ARL10,TBKBP1,MAGED1,GSPT2,SKAP2,SRSF5,HSP90AA1,RAB34,RANBP17,SMARCA1,FAF1,TRMT2B,HSP90AB1,CCT3,ZFP28,MACROD1,ZMAT1,PRPS1L3,NFYA,WDR41,STAT6,NINJ1,IRX5,SRSF2,CDC45,ARMCX4,TUFT1,MSTO1,GKAP1,GPI1,ORC3,HS6ST2,ADAM15,CORO1C,TMEM255A,SYNGR3,RAB27A,DLX2,FAM219B,PRIM1,IZUMO4,AHSA2,TERF2IP,TCP11L2,DMRT2,CHL…
TF	Factor: CREB,; motif: NTGACGTNA	TF:M00981	2.62156e-05	4.58144	8130	663	316	21833	ONECUT2,TWIST1,ECE2,GPRASP1,LGALS8,RIMKLB,USP11,PNCK,EN2,OPTN,PNMA3,TUBB2A,TSPYL2,KLHL4,ZCCHC18,ACOT7,ZSCAN18,MORF4L2,DGKA,SMC4,TBKBP1,BEX1,SCAPER,SKOR1,ANAPC5,WDR6,SKAP2,ARXES2,SRSF5,EEF1A1,RANBP17,SMARCA1,EIF2S3Y,SOX3,HSP90AB1,HSDL1,GRB10,CD200,DPYSL3,SNCAIP,STIL,SAT2,MMAB,SEC24D,ACHE,RSRP1,PRPS1L3,CTXN3,STAT6,NINJ1,IRX5,BBS2,RRAGB,CDC45,RIT2,TUFT1,SAMHD1,RHOU,GKAP1,PRSS16,DUS2,RNF25,BEX4,TMEM4…
TF	Factor: Sp1; motif: GGGGCGGGGC; match class: 1	TF:M00931_1	3.68445e-05	4.43363	4196	663	185	21833	ONECUT2,SFMBT2,TWIST1,PAX2,LGALS8,RIMKLB,SLC29A4,EMID1,EBF4,PNCK,GDI1,PNMA3,TSPYL2,ZCCHC18,ACOT7,SAMD14,MORF4L2,DGKA,TFAP2A,TBKBP1,SCAPER,COL5A3,DPYSL5,ANAPC5,SKAP2,HSP90AA1,RAB34,TMEM117,SMARCA1,FAF1,SOX3,HSP90AB1,CCT3,GRB10,APEH,SNCAIP,MMAB,MACROD1,ZMAT1,ACHE,PRPS1L3,WDR41,NT5E,SRSF2,ZFP157,CD99L2,TUFT1,RHOU,GKAP1,GPI1,STK3,ADAM15,DPP7,CORO1C,NRBP1,DLX4,RRM2B,PGRMC1,HAUS4,SYNGR3,AHSA2,TERF2IP,T…
TF	Factor: Sp1; motif: GGNGGGGGNGGGGGMGGGGCNGGG; match class: 1	TF:M10375_1	4.53996e-05	4.34295	7415	663	292	21833	ONECUT2,SFMBT2,TWIST1,ECE2,PAX2,RIMKLB,SLC29A4,EMID1,EBF4,PNCK,GDI1,EN2,OPTN,PNMA3,TSPYL2,ASH2L,ZCCHC18,ACOT7,ZSCAN18,SAMD14,MORF4L2,TFAP2A,TBKBP1,MAGED1,SCAPER,SKOR1,DPYSL5,SKAP2,ARXES2,SRSF5,HSP90AA1,EEF1A1,RAB34,TMEM117,RANBP17,FKBP14,SMARCA1,FAF1,TRMT2B,SOX3,HSP90AB1,GRB10,CD200,DPYSL3,APEH,SNCAIP,SAT2,MACROD1,ZMAT1,SEC24D,ACHE,PRPS1L3,WDR41,NT5E,CTXN3,STAT6,NINJ1,IRX5,SRSF2,BBS2,PODXL2,RIT2,…
TF	Factor: E2F-1; motif: TTGGCGCGRAANNGNM	TF:M00938	5.32454e-05	4.27372	5237	663	220	21833	ONECUT2,SFMBT2,TWIST1,GPRASP1,GPRASP2,RIMKLB,USP11,SLC29A4,EBF4,EN2,GAP43,ZCCHC18,SAMD14,PAFAH1B3,ANAPC5,SKAP2,ARXES2,HSP90AA1,SMARCA1,EIF2S3Y,TRMT2B,SOX3,GRB10,ZFP28,MACROD1,ZMAT1,SEC24D,CGREF1,NINJ1,IRX5,SRSF2,RRAGB,PODXL2,CDC45,CD99L2,TUFT1,SAMHD1,GKAP1,ORC3,DUS2,HS6ST2,NAGK,UCKL1,CCT5,CORO1C,DLX4,RRM2B,GAA,SUV39H1,HAUS4,DMRT2,MAPK3,TTC28,STK33,TELO2,ST7,PRPSAP1,FPGS,VASP,TRO,NELFB,SIM1,HOXD8,…
TF	Factor: MOVO-B; motif: GNGGGGG	TF:M01104	7.30063e-05	4.13664	7667	663	299	21833	ONECUT2,SFMBT2,TWIST1,PAX2,GPRASP2,RIMKLB,USP11,EMID1,EBF4,PNCK,EN2,OPTN,ZFP503,PNMA3,CDH18,TSPYL2,ASH2L,ZCCHC18,ACOT7,SAMD14,MORF4L2,DGKA,SMC4,TFAP2A,TBKBP1,MAGED1,PSME1,SKOR1,DPYSL5,ANAPC5,GSPT2,SKAP2,ARXES2,HSP90AA1,EEF1A1,RAB34,SMARCA1,TRMT2B,SOX3,HSP90AB1,HSDL1,GRB10,CD200,RDX,DPYSL3,APEH,SNCAIP,MACROD1,SEC24D,ACHE,CGREF1,WDR41,NT5E,NINJ1,IRX5,SRSF2,BBS2,CD99L2,RHOU,GKAP1,GPI1,STK3,PRSS16,TA…
TF	Factor: SP1:SP3; motif: CCSCCCCCYCC	TF:M01219	7.49057e-05	4.12549	6707	663	268	21833	ONECUT2,SFMBT2,TWIST1,PAX2,GPRASP2,RIMKLB,EMID1,EBF4,PNCK,EN2,TUBB2A,TSPYL2,ZCCHC18,ZSCAN18,SAMD14,MORF4L2,TFAP2A,TBKBP1,BEX1,MAGED1,PSME1,COL5A3,DPYSL5,WDR6,SKAP2,HSP90AA1,EEF1A1,RAB34,RANBP17,FKBP14,SMARCA1,FAF1,TRMT2B,PRMT2,SOX3,HSP90AB1,GRB10,CD200,DPYSL3,APEH,SNCAIP,ELAC1,MACROD1,ZMAT1,SEC24D,ACHE,NT5E,NINJ1,IRX5,BBS2,ZFP157,PODXL2,CD99L2,ARMCX4,TUFT1,MSTO1,GKAP1,GPI1,PRSS16,DUS2,TAOK3,BEX4,…
TF	Factor: Egr-2; motif: NTGCGTRGGCGK	TF:M00246	7.87229e-05	4.1039	5380	663	224	21833	ONECUT2,SFMBT2,GPRASP1,GPRASP2,ASL,SLC29A4,EBF4,PNCK,EN2,OPTN,GAP43,TUBB2A,TSPYL2,ZSCAN18,PAFAH1B3,MORF4L2,DGKA,ARL10,TBKBP1,BEX1,MAGED1,SKOR1,WDR6,SKAP2,RAB34,TMEM117,SOX3,CD200,ZFP28,ELAC1,MMAB,MACROD1,ZMAT1,SEC24D,CGREF1,NFYA,WDR41,NT5E,NINJ1,SRSF2,RRAGB,PODXL2,PRR13,TUFT1,TSPYL3,RHOU,GKAP1,GPI1,STK3,BEX4,TMEM43,NAGK,CENPC1,CORO1C,RRM2B,GAA,SUV39H1,HAUS4,RAB27A,DLX2,IZUMO4,COX20,FCHSD1,RNF2,AC…
TF	Factor: Egr-2; motif: GCGTGGGCGG	TF:M05494	8.6409e-05	4.06344	7242	663	285	21833	ONECUT2,SFMBT2,TWIST1,ECE2,PAX2,LGALS8,GPRASP2,RIMKLB,ASL,SLC29A4,EMID1,EBF4,PNCK,EN2,GAP43,TUBB2A,TSPYL2,NRIP2,DYNC1I1,ZSCAN18,SAMD14,MORF4L2,DGKA,TFAP2A,TBKBP1,BEX1,MAGED1,PSME1,SKOR1,ANAPC5,GSPT2,ARXES2,SRSF5,HSP90AA1,EEF1A1,RAB34,TMEM117,SMARCA1,FAF1,PRMT2,SOX3,HSP90AB1,HSDL1,GRB10,CD200,DPYSL3,APEH,SNCAIP,MACROD1,ZMAT1,SEC24D,ACHE,CGREF1,WDR41,NT5E,NINJ1,RRAGB,PODXL2,CD99L2,TUFT1,TSPYL3,RHOU…
TF	Factor: WT1; motif: NNGGGNGGGSGN	TF:M07436	9.17214e-05	4.03753	7746	663	301	21833	ONECUT2,SFMBT2,TWIST1,GPRASP1,PAX2,RIMKLB,EMID1,EBF4,PNCK,OPTN,PNMA3,TSPYL2,ZCCHC18,ZSCAN18,SAMD14,MORF4L2,TFAP2A,MAGED1,SKOR1,DPYSL5,ARXES2,SRSF5,HSP90AA1,EEF1A1,RANBP17,FKBP14,FAF1,TRMT2B,HSP90AB1,CCT3,CD200,DPYSL3,APEH,SNCAIP,SAT2,ZMAT1,REM2,ACHE,PRPS1L3,CGREF1,NT5E,CTXN3,NINJ1,IRX5,BBS2,PODXL2,RIT2,CD99L2,ARMCX4,TUFT1,RHOU,GKAP1,GPI1,STK3,PRSS16,DUS2,TAOK3,CCT5,CENPC1,ADAM15,CORO1C,NRBP1,DLX4…
TF	Factor: E2F; motif: TTTSGCGC	TF:M00050	0.000132865	3.87659	6196	663	250	21833	GPRASP1,LGALS8,GPRASP2,USP11,EN2,ZFP503,TUBB2A,ZCCHC18,ACOT7,SAMD14,ARL10,BEX1,MAGED1,SCAPER,ANAPC5,GSPT2,WDR6,SKAP2,SRSF5,RAB34,TMEM117,SMARCA1,FAF1,EIF2S3Y,SOX3,HSP90AB1,CCT3,CD200,DPYSL3,ZFP28,APEH,MACROD1,ZMAT1,PRPS1L3,NFYA,WDR41,NINJ1,SRSF2,CDC45,PRR13,TUFT1,SAMHD1,MSTO1,ORC3,CYB5R1,PRSS16,HS6ST2,RNF25,SUV39H1,PGRMC1,SYNGR3,GGACT,MAGED2,DLX2,IZUMO4,AHSA2,TERF2IP,MRI1,TCP11L2,DMRT2,MAPK3,CHL1…
TF	Factor: GKLF; motif: NNRRGRRNGNSNNN; match class: 1	TF:M07040_1	0.000148135	3.82934	8477	663	323	21833	ONECUT2,SFMBT2,TWIST1,FHL1,GPRASP1,PAX2,GPRASP2,RIMKLB,ASL,EBF4,PNCK,GDI1,EN2,KLHL4,ZCCHC18,ACOT7,ZSCAN18,SAMD14,PAFAH1B3,MORF4L2,ARL10,SMC4,TFAP2A,TBKBP1,BEX1,MAGED1,ANAPC5,WDR6,ARXES2,SRSF5,HSP90AA1,EEF1A1,RAB34,RANBP17,FKBP14,SMARCA1,TRMT2B,HSP90AB1,CCT3,GRB10,DPYSL3,SNCAIP,ELAC1,ZMAT1,REM2,SEC24D,ACHE,RSRP1,PRPS1L3,CGREF1,NFYA,NT5E,CTXN3,NINJ1,IRX5,SRSF2,BBS2,PODXL2,CDC45,RIT2,CD99L2,HSD17B11…
TF	Factor: CACD; motif: CCACRCCC	TF:M01113	0.000183399	3.7366	10872	663	396	21833	ONECUT2,SFMBT2,TWIST1,ECE2,GPRASP1,LGALS8,RIMKLB,USP11,SLC29A4,PNCK,GDI1,OPTN,PNMA3,GAP43,TUBB2A,TSPYL2,ASH2L,ACOT7,DYNC1I1,PAFAH1B3,MORF4L2,CCDC39,DGKA,ARL10,TFAP2A,TBKBP1,UCMA,MAGED1,PSME1,COL5A3,SKOR1,DPYSL5,ANAPC5,WDR6,SKAP2,SRSF5,HSP90AA1,EEF1A1,RAB34,TMEM117,FKBP14,SMARCA1,FAF1,TRMT2B,PRMT2,SOX3,HSP90AB1,HSDL1,CCT3,GRB10,CD200,ZFP28,SNCAIP,SAT2,MACROD1,ZMAT1,ACHE,RSRP1,CGREF1,NFYA,NT5E,CTXN…
TF	Factor: E2F-7; motif: GRGGCGGGAANNN	TF:M10212	0.000210388	3.67698	8122	663	311	21833	ONECUT2,SFMBT2,TWIST1,PAX2,RIMKLB,USP11,SLC29A4,EBF4,PNCK,EN2,OPTN,ZFP503,TSPYL2,ASH2L,KLHL4,ZCCHC18,SAMD14,PAFAH1B3,MORF4L2,SMC4,TBKBP1,BEX1,MAGED1,PSME1,SCAPER,COL5A3,SKOR1,DPYSL5,ANAPC5,WDR6,SKAP2,HSP90AA1,TMEM117,RANBP17,FAF1,EIF2S3Y,TRMT2B,SOX3,HSP90AB1,HSDL1,CCT3,GRB10,APEH,SNCAIP,SAT2,MACROD1,ZMAT1,REM2,RSRP1,PRPS1L3,NFYA,NT5E,NINJ1,SRSF2,BBS2,PODXL2,CDC45,CD99L2,PRR13,TUFT1,SAMHD1,RHOU,GK…
TF	Factor: E2F; motif: NNTTTCGCGCN	TF:M08875	0.000237962	3.62349	5183	663	215	21833	TWIST1,ECE2,GPRASP2,USP11,EN2,ZFP503,GAP43,TUBB2A,TSPYL2,ACOT7,ZSCAN18,SAMD14,ARL10,SMC4,BEX1,MAGED1,SCAPER,DPYSL5,ANAPC5,WDR6,ARXES2,TMEM117,SMARCA1,FAF1,EIF2S3Y,TRMT2B,SOX3,HSDL1,CCT3,GRB10,ZFP28,APEH,MACROD1,SEC24D,PRPS1L3,NFYA,WDR41,NINJ1,IRX5,RRAGB,PODXL2,PRR13,TUFT1,MSTO1,GPI1,ORC3,HS6ST2,BEX4,CORO1C,RRM2B,SUV39H1,SYNGR3,IZUMO4,TERF2IP,MRI1,TCP11L2,MAPK3,FCHSD1,CHL1,STK33,TELO2,ST7,PRPSAP1,…
TF	Factor: SP2; motif: GNNGGGGGCGGGGSN; match class: 1	TF:M03807_1	0.000339404	3.46928	2965	663	137	21833	ONECUT2,RIMKLB,SLC29A4,EBF4,GDI1,TSPYL2,ACOT7,SAMD14,MORF4L2,DGKA,TFAP2A,SCAPER,DPYSL5,ANAPC5,SKAP2,HSP90AA1,TMEM117,FAF1,HSP90AB1,DPYSL3,APEH,ZMAT1,ACHE,PRPS1L3,WDR41,NT5E,SRSF2,CD99L2,TUFT1,GKAP1,STK3,ADAM15,CORO1C,NRBP1,RRM2B,PGRMC1,HAUS4,IZUMO4,AHSA2,COX20,MAPK3,TTC28,FCHSD1,RNF2,PHF1,HDAC1,TRO,HCN3,MAST1,KIZ,AIFM2,SGSH,KHNYN,CCT2,SLC25A38,SYNC,TCAIM,PRKRA,HOOK2,ASCC1,CCDC112,TXNRD3,TFR2,MTSS…
TF	Factor: Klf12; motif: GRCCACGCCCWNNNN	TF:M03915	0.000355983	3.44857	561	663	41	21833	OPTN,GAP43,COL5A3,SKAP2,PRMT2,NFYA,TUFT1,NAGK,CORO1C,RNF2,NELFB,SLC25A38,ZFP90,HOOK2,GTF3C6,TOP1MT,LHFPL5,PPOX,PRPSAP2,ERGIC3,OSGEP,BBS9,CATSPERD,LRP10,BLOC1S5,HEXDC,ILVBL,TEC,TRIM26,CLK4,ZNHIT6,CEP78,FLOT1,FBXL6,SAP30,HELB,RCN1,APEX1,LRRC61,CAPN10,CAPRIN2
TF	Factor: SP2; motif: GGGCGGGAC	TF:M01783	0.000360992	3.4425	8131	663	310	21833	ONECUT2,PAX2,LGALS8,GPRASP2,RIMKLB,SLC29A4,EBF4,PNCK,GDI1,TUBB2A,TSPYL2,ASH2L,ACOT7,DYNC1I1,SAMD14,PAFAH1B3,DGKA,SMC4,MAGED1,SCAPER,COL5A3,SKOR1,DPYSL5,ANAPC5,WDR6,SKAP2,SRSF5,HSP90AA1,TMEM117,RANBP17,SMARCA1,FAF1,EIF2S3Y,TRMT2B,PRMT2,HSP90AB1,HSDL1,CCT3,GRB10,APEH,SNCAIP,ELAC1,SAT2,MMAB,ZMAT1,REM2,SEC24D,PRPS1L3,NFYA,WDR41,NT5E,STAT6,SRSF2,BBS2,RRAGB,ZFP157,PODXL2,CDC45,CD99L2,ARMCX4,PRR13,TUFT1…
TF	Factor: Irf-4; motif: NNNANCGAAACYNNA	TF:M02768	0.000366614	3.43579	5033	663	209	21833	ONECUT2,SFMBT2,FHL1,PAX2,RIMKLB,EMID1,CDH18,ASH2L,ZCCHC18,MORF4L2,ARL10,SMC4,UCMA,MAGED1,PSME1,DPYSL5,GSPT2,FKBP14,SMARCA1,EIF2S3Y,PRMT2,GRB10,CD200,SNCAIP,SAT2,REM2,PRPS1L3,NFYA,CTXN3,NINJ1,TUFT1,MSTO1,RHOU,OTOGL,ORC3,TAOK3,RNF25,TMEM43,UCKL1,CCT5,DPP7,MID2,CREB3L3,DNAJC12,TMEM255A,PGRMC1,MAGED2,PABPN1,TTC28,9930104L06RIK,RNF2,TUBA1A,TRPC4,CWF19L2,TRO,ZFP229,GPN3,NNMT,MAST1,PRDX3,NAA16,HSPA8,KHN…
TF	Factor: WT1; motif: GNGGGGGCGGGG	TF:M03893	0.000386372	3.41299	6668	663	263	21833	ONECUT2,SFMBT2,TWIST1,PAX2,GPRASP2,RIMKLB,USP11,ASL,SLC29A4,EMID1,EBF4,PNCK,EN2,OPTN,TSPYL2,SAMD14,MORF4L2,TFAP2A,TBKBP1,BEX1,MAGED1,COL5A3,SKOR1,DPYSL5,ANAPC5,GSPT2,SKAP2,ARXES2,HSP90AA1,RAB34,SMARCA1,FAF1,TRMT2B,PRMT2,SOX3,HSP90AB1,GRB10,CD200,DPYSL3,APEH,SNCAIP,MACROD1,SEC24D,ACHE,NFYA,WDR41,NINJ1,SRSF2,BBS2,RRAGB,CD99L2,TUFT1,MSTO1,GKAP1,STK3,PRSS16,ACADVL,TAOK3,BEX4,TMEM43,NAGK,CORO1C,NRBP1,…
TF	Factor: HIF-1alpha; motif: NCACGT	TF:M02012	0.000482454	3.31654	6377	663	253	21833	TWIST1,ECE2,LGALS8,ASL,EN2,PNMA3,ASH2L,KLHL4,ZSCAN18,PAFAH1B3,CCDC39,ARL10,TFAP2A,TBKBP1,BEX1,DPYSL5,ARXES2,SRSF5,HSP90AA1,RAB34,FAF1,TRMT2B,SOX3,HSP90AB1,GRB10,STIL,MMAB,MACROD1,ACHE,NT5E,STAT6,NINJ1,SRSF2,RRAGB,PODXL2,HSD17B11,TUFT1,MSTO1,TSPYL3,GPI1,CYB5R1,HS6ST2,BEX4,TMEM43,UCKL1,CCT5,CENPC1,DPP7,MID2,CORO1C,CREB3L3,DLX4,SUV39H1,RAB27A,DLX2,LTA4H,TERF2IP,COX20,TCP11L2,MAPK3,TIA1,STK33,MLH3,AC…
TF	Factor: CTCF; motif: NAGGGGGCGCNNKNNNN; match class: 1	TF:M08995_1	0.000486066	3.3133	9372	663	348	21833	ONECUT2,SFMBT2,TWIST1,PAX2,GPRASP2,RIMKLB,USP11,SLC29A4,EMID1,EBF4,PNCK,EN2,ZFP503,PNMA3,GAP43,TUBB2A,TSPYL2,ZCCHC18,NRIP2,ZSCAN18,SAMD14,PAFAH1B3,MORF4L2,DGKA,TFAP2A,TBKBP1,BEX1,MAGED1,PSME1,SKOR1,DPYSL5,ANAPC5,WDR6,SKAP2,HSP90AA1,RAB34,RANBP17,SMARCA1,FAF1,TRMT2B,PRMT2,SOX3,HSP90AB1,HSDL1,CCT3,GRB10,CD200,RDX,DPYSL3,APEH,SNCAIP,SAT2,MMAB,ZMAT1,SEC24D,ACHE,RSRP1,NFYA,WDR41,CTXN3,STAT6,NINJ1,IRX5…
TF	Factor: E2F-1; motif: TWSGCGCGAAAAYKR; match class: 1	TF:M00024_1	0.000819287	3.08656	2248	663	109	21833	SFMBT2,LGALS8,GPRASP2,EN2,ACOT7,ARL10,SMC4,TFAP2A,BEX1,MAGED1,ANAPC5,WDR6,SMARCA1,EIF2S3Y,TRMT2B,SOX3,CD200,ELAC1,SAT2,WDR41,NINJ1,RRAGB,ARMCX4,TUFT1,MSTO1,CYB5R1,HS6ST2,BEX4,CCT5,CENPC1,SUV39H1,PRIM1,TERF2IP,FCHSD1,STK33,MYEF2,ZFP955A,FPGS,CWF19L2,TRO,NELFB,ZFP229,HOXD8,LIN28B,CCT2,SYNC,SHARPIN,VDAC3,ZFP3,MTBP,CEP57,MTSS1,CCAR1,CEP120,DIS3,LATS2,BARX1,ZFP92,ZC4H2,RALGPS2,CLRN1,STAG1,CNOT10,MROH7…
TF	Factor: Sp3; motif: AGGGCGG	TF:M05665	0.000980559	3.00853	7264	663	280	21833	SFMBT2,TWIST1,GPRASP1,PAX2,LGALS8,SLC29A4,EMID1,EBF4,OPTN,KLHL4,ZCCHC18,SAMD14,MORF4L2,SMC4,TFAP2A,MAGED1,COL5A3,SKOR1,ANAPC5,WDR6,SKAP2,ARXES2,SRSF5,EEF1A1,TMEM117,SMARCA1,FAF1,PRMT2,HSP90AB1,HSDL1,CCT3,GRB10,CD200,ZFP28,APEH,MMAB,MACROD1,REM2,RSRP1,NT5E,NINJ1,SRSF2,RRAGB,PODXL2,CD99L2,HSD17B11,ARMCX4,PRR13,TUFT1,SAMHD1,GKAP1,DUS2,HS6ST2,RNF25,TMEM43,MAOA,NAGK,CENPC1,DPP7,NRBP1,DLX4,RRM2B,SUV39H…
TF	Factor: LKLF; motif: NGGGCGG	TF:M05391	0.000980559	3.00853	7264	663	280	21833	SFMBT2,TWIST1,GPRASP1,PAX2,LGALS8,SLC29A4,EMID1,EBF4,OPTN,KLHL4,ZCCHC18,SAMD14,MORF4L2,SMC4,TFAP2A,MAGED1,COL5A3,SKOR1,ANAPC5,WDR6,SKAP2,ARXES2,SRSF5,EEF1A1,TMEM117,SMARCA1,FAF1,PRMT2,HSP90AB1,HSDL1,CCT3,GRB10,CD200,ZFP28,APEH,MMAB,MACROD1,REM2,RSRP1,NT5E,NINJ1,SRSF2,RRAGB,PODXL2,CD99L2,HSD17B11,ARMCX4,PRR13,TUFT1,SAMHD1,GKAP1,DUS2,HS6ST2,RNF25,TMEM43,MAOA,NAGK,CENPC1,DPP7,NRBP1,DLX4,RRM2B,SUV39H…
TF	Factor: SP6; motif: WGGGCGG	TF:M05455	0.000980559	3.00853	7264	663	280	21833	SFMBT2,TWIST1,GPRASP1,PAX2,LGALS8,SLC29A4,EMID1,EBF4,OPTN,KLHL4,ZCCHC18,SAMD14,MORF4L2,SMC4,TFAP2A,MAGED1,COL5A3,SKOR1,ANAPC5,WDR6,SKAP2,ARXES2,SRSF5,EEF1A1,TMEM117,SMARCA1,FAF1,PRMT2,HSP90AB1,HSDL1,CCT3,GRB10,CD200,ZFP28,APEH,MMAB,MACROD1,REM2,RSRP1,NT5E,NINJ1,SRSF2,RRAGB,PODXL2,CD99L2,HSD17B11,ARMCX4,PRR13,TUFT1,SAMHD1,GKAP1,DUS2,HS6ST2,RNF25,TMEM43,MAOA,NAGK,CENPC1,DPP7,NRBP1,DLX4,RRM2B,SUV39H…
TF	Factor: CPBP; motif: NGGGCGG	TF:M05301	0.000980559	3.00853	7264	663	280	21833	SFMBT2,TWIST1,GPRASP1,PAX2,LGALS8,SLC29A4,EMID1,EBF4,OPTN,KLHL4,ZCCHC18,SAMD14,MORF4L2,SMC4,TFAP2A,MAGED1,COL5A3,SKOR1,ANAPC5,WDR6,SKAP2,ARXES2,SRSF5,EEF1A1,TMEM117,SMARCA1,FAF1,PRMT2,HSP90AB1,HSDL1,CCT3,GRB10,CD200,ZFP28,APEH,MMAB,MACROD1,REM2,RSRP1,NT5E,NINJ1,SRSF2,RRAGB,PODXL2,CD99L2,HSD17B11,ARMCX4,PRR13,TUFT1,SAMHD1,GKAP1,DUS2,HS6ST2,RNF25,TMEM43,MAOA,NAGK,CENPC1,DPP7,NRBP1,DLX4,RRM2B,SUV39H…
TF	Factor: E2F-4; motif: GNNGGCGGGAAN	TF:M09682	0.000981251	3.00822	5940	663	237	21833	ONECUT2,SFMBT2,TWIST1,RIMKLB,USP11,SLC29A4,PNCK,EN2,OPTN,ZFP503,KLHL4,ZCCHC18,SAMD14,PAFAH1B3,SMC4,BEX1,MAGED1,PSME1,SCAPER,SKOR1,DPYSL5,ANAPC5,WDR6,SKAP2,HSP90AA1,RANBP17,FAF1,SOX3,HSDL1,GRB10,SNCAIP,MACROD1,ZMAT1,REM2,RSRP1,PRPS1L3,NFYA,NINJ1,SRSF2,PODXL2,CD99L2,TUFT1,SAMHD1,GKAP1,STK3,CYB5R1,HS6ST2,BEX4,MAOA,NAGK,CENPC1,PGRMC1,HAUS4,TPX2,MAGED2,DLX2,FAM219B,PRIM1,IZUMO4,AHSA2,TERF2IP,COX20,DMR…
TF	Factor: CNOT3; motif: GGCCGCGSSS	TF:M01253	0.000992626	3.00321	2690	663	125	21833	ONECUT2,RIMKLB,SLC29A4,PNCK,ARL10,TFAP2A,TBKBP1,BEX1,COL5A3,SKOR1,SRSF5,HSP90AA1,RAB34,RANBP17,SMARCA1,HSDL1,GRB10,RDX,ZFP28,SNCAIP,ELAC1,ACHE,NFYA,NINJ1,PODXL2,RHOU,GKAP1,CORO1C,RRM2B,SUV39H1,HAUS4,LTA4H,IZUMO4,AHSA2,MAPK3,TTC28,INPP5F,RNF2,PHF1,ST7,PRPSAP1,MYEF2,HCN3,HOXD8,HSPA8,CKAP4,LBX1,ILK,CCDC126,LHFPL5,ZFP711,FRMD3,NAP1L5,RALGPS2,POFUT1,STAG1,SRSF1,THAP3,CCDC142,CD109,SRSF6,CCT8,FOXB1,PGD…
TF	Factor: Ets2; motif: ACCGGAWRYN	TF:M01989	0.0010263	2.98872	7927	663	301	21833	PAX2,RIMKLB,USP11,ASL,SLC29A4,EMID1,EN2,OPTN,NDN,ASH2L,ACOT7,SAMD14,PAFAH1B3,SCAPER,DPYSL5,SRSF5,HSP90AA1,RAB34,SMARCA1,PRMT2,HSP90AB1,CCT3,ZFP28,APEH,ELAC1,STIL,SAT2,ACHE,RSRP1,PRPS1L3,NFYA,WDR41,STAT6,NINJ1,SRSF2,BBS2,RRAGB,CDC45,PRR13,TUFT1,MSTO1,TSPYL3,GKAP1,ORC3,RNF25,NAGK,UCKL1,CCT5,CENPC1,ADAM15,DPP7,CORO1C,DLX4,RRM2B,VBP1,GAA,SUV39H1,HAUS4,SYNGR3,TPX2,MAGED2,PRIM1,IZUMO4,AHSA2,TERF2IP,COX…
TF	Factor: Atf-1; motif: RTGACGTA	TF:M07980	0.00104057	2.98273	8820	663	329	21833	ONECUT2,SFMBT2,TWIST1,ECE2,GPRASP1,LGALS8,RIMKLB,USP11,PNCK,EN2,OPTN,PNMA3,TUBB2A,TSPYL2,ZCCHC18,ACOT7,NRIP2,ZSCAN18,SAMD14,MORF4L2,SMC4,TBKBP1,BEX1,SCAPER,SKOR1,ANAPC5,WDR6,SKAP2,ARXES2,SRSF5,HSP90AA1,EEF1A1,RAB34,RANBP17,SMARCA1,EIF2S3Y,TRMT2B,SOX3,HSP90AB1,HSDL1,GRB10,CD200,DPYSL3,SNCAIP,STIL,SAT2,MMAB,ZMAT1,SEC24D,ACHE,RSRP1,PRPS1L3,CGREF1,CTXN3,STAT6,NINJ1,IRX5,BBS2,RRAGB,CDC45,RIT2,ARMCX4,S…
TF	Factor: LKLF; motif: GGGGTGGKSN	TF:M07261	0.00111203	2.95388	9212	663	341	21833	ONECUT2,SFMBT2,TWIST1,GPRASP1,GPRASP2,RIMKLB,USP11,RGS13,EMID1,EBF4,PNCK,GDI1,OPTN,ZFP503,PNMA3,GAP43,CDH18,TUBB2A,TSPYL2,ASH2L,ZCCHC18,ACOT7,PAFAH1B3,MORF4L2,TFAP2A,TBKBP1,MAGED1,PSME1,SCAPER,SKOR1,DPYSL5,GSPT2,SKAP2,ARXES2,SRSF5,RAB34,TMEM117,SMARCA1,FAF1,EIF2S3Y,TRMT2B,SOX3,HSP90AB1,HSDL1,CCT3,GRB10,DPYSL3,SNCAIP,SAT2,MMAB,ZMAT1,REM2,ACHE,RSRP1,NT5E,CTXN3,NINJ1,IRX5,SRSF2,PODXL2,RIT2,CD99L2,AR…
TF	Factor: WT1; motif: CGCCCCCNCN	TF:M02036	0.00134804	2.8703	7539	663	288	21833	ONECUT2,SFMBT2,TWIST1,PAX2,LGALS8,GPRASP2,RIMKLB,USP11,SLC29A4,EMID1,EBF4,PNCK,GDI1,EN2,OPTN,TUBB2A,TSPYL2,NRIP2,SAMD14,PAFAH1B3,MORF4L2,DGKA,TFAP2A,TBKBP1,BEX1,MAGED1,SKOR1,DPYSL5,ANAPC5,GSPT2,SKAP2,HSP90AA1,RAB34,RANBP17,SMARCA1,FAF1,TRMT2B,PRMT2,SOX3,HSP90AB1,HSDL1,CCT3,GRB10,CD200,RDX,DPYSL3,APEH,SNCAIP,SEC24D,ACHE,WDR41,NINJ1,IRX5,BBS2,PODXL2,RIT2,CD99L2,TUFT1,MSTO1,RHOU,GKAP1,GPI1,PRSS16,AC…
TF	Factor: CREB; motif: NSTGACGTMANN	TF:M00178	0.00142212	2.84706	5183	663	211	21833	ONECUT2,TWIST1,GPRASP1,RIMKLB,USP11,EN2,OPTN,PNMA3,TUBB2A,TSPYL2,KLHL4,ZCCHC18,ACOT7,ZSCAN18,MORF4L2,DGKA,SMC4,BEX1,SCAPER,SKOR1,WDR6,SKAP2,SRSF5,EEF1A1,RANBP17,SMARCA1,EIF2S3Y,SOX3,HSP90AB1,HSDL1,CD200,SNCAIP,MMAB,SEC24D,RSRP1,PRPS1L3,STAT6,NINJ1,BBS2,RRAGB,CDC45,RIT2,SAMHD1,PRSS16,DUS2,BEX4,ADAM15,VBP1,GAA,PGRMC1,SYNGR3,GGACT,MAGED2,DLX2,AHSA2,COX20,MRI1,MAPK3,INPP5F,CHL1,STAT4,PHF1,ST7,ZFP955A…
TF	Factor: KROX; motif: CCCGCCCCCRCCCC	TF:M00982	0.00143809	2.84221	5998	663	238	21833	ONECUT2,SFMBT2,TWIST1,PAX2,LGALS8,GPRASP2,RIMKLB,ASL,SLC29A4,EMID1,EBF4,PNCK,TUBB2A,TSPYL2,DYNC1I1,ZSCAN18,SAMD14,PAFAH1B3,MORF4L2,DGKA,TFAP2A,TBKBP1,BEX1,COL5A3,SKOR1,DPYSL5,GSPT2,SKAP2,HSP90AA1,RAB34,RANBP17,SMARCA1,TRMT2B,PRMT2,SOX3,HSP90AB1,CCT3,CD200,DPYSL3,APEH,SNCAIP,SEC24D,ACHE,NFYA,WDR41,NINJ1,IRX5,BBS2,PODXL2,CD99L2,TUFT1,MSTO1,RHOU,GKAP1,GPI1,STK3,PRSS16,ACADVL,DUS2,TAOK3,BEX4,TMEM43,C…
TF	Factor: ZNF151; motif: GGSGGNGGGGGAGGGGMGG	TF:M10412	0.00180981	2.74237	3820	663	164	21833	ONECUT2,TWIST1,ECE2,RIMKLB,EBF4,PNCK,EN2,OPTN,KLHL4,ZCCHC18,ZSCAN18,SAMD14,MORF4L2,SMC4,TFAP2A,TBKBP1,COL5A3,DPYSL5,WDR6,ARXES2,EEF1A1,SMARCA1,TRMT2B,HSP90AB1,CCT3,APEH,SAT2,ZMAT1,SEC24D,PRPS1L3,NT5E,STAT6,SRSF2,BBS2,CD99L2,HSD17B11,CYB5R1,DUS2,TAOK3,RNF25,CENPC1,ADAM15,CORO1C,NRBP1,SYNGR3,MAGED2,LTA4H,TCEAL3,COX20,MAPK3,RNF2,TUBA1A,ST7,TRPC4,HDAC1,VASP,TRO,GPN3,HDAC2,TPPP3,MAST1,LYRM9,HSPA8,SGSH…
TF	Factor: ERG; motif: ACCGGAART	TF:M01752	0.00187493	2.72702	9547	663	350	21833	TWIST1,GPRASP1,PAX2,LGALS8,RIMKLB,USP11,ASL,SLC29A4,EMID1,EN2,OPTN,NDN,ASH2L,ACOT7,SAMD14,PAFAH1B3,SMC4,TBKBP1,SCAPER,DPYSL5,GSPT2,SKAP2,SRSF5,HSP90AA1,RAB34,SMARCA1,PRMT2,HSP90AB1,CCT3,RDX,ZFP28,APEH,ELAC1,STIL,SAT2,ACHE,PRPS1L3,NFYA,WDR41,STAT6,NINJ1,SRSF2,BBS2,RRAGB,CDC45,CD99L2,PRR13,TUFT1,SAMHD1,MSTO1,TSPYL3,GKAP1,GPI1,ORC3,TAOK3,RNF25,TMEM43,NAGK,UCKL1,CCT5,CENPC1,ADAM15,DPP7,CORO1C,NRBP1,D…
TF	Factor: Zfp740; motif: NCCCCCCCAC	TF:M03944	0.00206806	2.68444	7322	663	280	21833	ONECUT2,SFMBT2,TWIST1,PAX2,LGALS8,GPRASP2,ASL,EBF4,PNCK,GDI1,OPTN,ZFP503,PNMA3,GAP43,TUBB2A,KLHL4,ZCCHC18,ACOT7,SAMD14,MORF4L2,TFAP2A,TBKBP1,BEX1,MAGED1,PSME1,SKOR1,WDR6,ARXES2,SRSF5,HSP90AA1,EEF1A1,RAB34,RANBP17,FKBP14,SMARCA1,TRMT2B,HSP90AB1,HSDL1,CCT3,GRB10,DPYSL3,SNCAIP,MACROD1,ZMAT1,REM2,NT5E,CTXN3,STAT6,NINJ1,IRX5,SRSF2,BBS2,RRAGB,PODXL2,ARMCX4,TUFT1,TSPYL3,GPI1,CYB5R1,PRSS16,DUS2,CCT5,CENP…
TF	Factor: E2F; motif: NKCGCGCSAAAN	TF:M00920	0.00282646	2.54876	4873	663	199	21833	FHL1,ECE2,GPRASP1,LGALS8,GPRASP2,USP11,EN2,TUBB2A,TSPYL2,ZCCHC18,ACOT7,DYNC1I1,SAMD14,MORF4L2,ARL10,TBKBP1,MAGED1,GSPT2,SRSF5,RAB34,RANBP17,SMARCA1,FAF1,TRMT2B,SOX3,HSP90AB1,CCT3,ZFP28,MACROD1,ZMAT1,PRPS1L3,NFYA,STAT6,NINJ1,IRX5,SRSF2,PODXL2,CDC45,ARMCX4,TUFT1,MSTO1,GKAP1,GPI1,ORC3,DUS2,HS6ST2,NAGK,CORO1C,TMEM255A,SYNGR3,RAB27A,DLX2,FAM219B,PRIM1,AHSA2,TERF2IP,TCP11L2,DMRT2,CHL1,ACAA1A,TELO2,PRPS…
TF	Factor: E2F; motif: TTTSGCGSG	TF:M00918	0.00309995	2.50865	4820	663	197	21833	TWIST1,FHL1,ECE2,GPRASP1,LGALS8,GPRASP2,USP11,EN2,TUBB2A,ACOT7,DYNC1I1,SAMD14,DGKA,ARL10,TBKBP1,GSPT2,SRSF5,HSP90AA1,RAB34,RANBP17,SMARCA1,FAF1,HSP90AB1,CCT3,ZFP28,MACROD1,ZMAT1,PRPS1L3,NFYA,STAT6,NINJ1,IRX5,SRSF2,CDC45,ARMCX4,TUFT1,SAMHD1,MSTO1,GKAP1,ORC3,HS6ST2,CORO1C,TMEM255A,SYNGR3,GGACT,MAGED2,RAB27A,DLX2,FAM219B,IZUMO4,AHSA2,TERF2IP,TCP11L2,DMRT2,CHL1,TELO2,PRPSAP1,MYEF2,TRO,NELFB,SIM1,HOXD…
TF	Factor: CREB1; motif: NRRTGACGTMA	TF:M10200	0.00310577	2.50783	4672	663	192	21833	ECE2,GPRASP1,USP11,EN2,OPTN,PNMA3,TUBB2A,ACOT7,ZSCAN18,MORF4L2,TBKBP1,SCAPER,SKOR1,WDR6,SKAP2,SRSF5,SMARCA1,EIF2S3Y,SOX3,HSP90AB1,CD200,SNCAIP,STIL,MMAB,SEC24D,ACHE,PRPS1L3,CTXN3,STAT6,NINJ1,BBS2,RRAGB,RIT2,DUS2,TMEM43,GAA,PGRMC1,SYNGR3,GGACT,DLX2,COX20,MRI1,TCP11L2,MAPK3,INPP5F,CHL1,PHF1,ST7,TRO,NELFB,TPPP3,MAST1,CKAP4,ZWINT,CCT2,HEXIM2,CHRNB2,ZFP383,MTBP,GTF3C6,ATAT1,CEP57,TFR2,TOP1MT,ZFP711,SD…
TF	Factor: RNF96; motif: BCCCGCRGCC	TF:M01199	0.00342496	2.46534	6369	663	248	21833	ONECUT2,SFMBT2,ECE2,PAX2,LGALS8,RIMKLB,EBF4,EN2,OPTN,DYNC1I1,SAMD14,PAFAH1B3,CCDC39,ARL10,BEX1,PSME1,SCAPER,SKOR1,DPYSL5,GSPT2,WDR6,HSP90AA1,EEF1A1,RAB34,TMEM117,RANBP17,SMARCA1,SOX3,HSP90AB1,HSDL1,GRB10,RDX,ZFP28,SNCAIP,ELAC1,MMAB,MACROD1,ZMAT1,SEC24D,RSRP1,PRPS1L3,CGREF1,WDR41,NT5E,IRX5,SRSF2,PODXL2,ARMCX4,PRR13,TSPYL3,RHOU,GKAP1,ORC3,HS6ST2,BEX4,TMEM43,CCT5,ADAM15,NRBP1,SUV39H1,PGRMC1,DLX2,IZU…
TF	Factor: ATF2; motif: VGTGACGTMACN	TF:M00179	0.00383431	2.41631	6010	663	236	21833	ONECUT2,TWIST1,ECE2,GPRASP1,RIMKLB,USP11,EN2,OPTN,PNMA3,TUBB2A,TSPYL2,KLHL4,ZCCHC18,ACOT7,NRIP2,ZSCAN18,MORF4L2,DGKA,SMC4,TBKBP1,BEX1,SCAPER,SKOR1,WDR6,ARXES2,SRSF5,EEF1A1,RANBP17,SMARCA1,EIF2S3Y,SOX3,HSP90AB1,HSDL1,CD200,SNCAIP,STIL,SAT2,MMAB,SEC24D,ACHE,RSRP1,STAT6,NINJ1,BBS2,RRAGB,CDC45,RIT2,SAMHD1,DUS2,BEX4,TMEM43,ADAM15,DNAJC12,VBP1,GAA,PGRMC1,SYNGR3,GGACT,DLX2,LTA4H,AHSA2,COX20,MRI1,MAPK3,I…
TF	Factor: VDR; motif: GGGKNARNRRGGWSA	TF:M00444	0.0046859	2.32921	10050	663	363	21833	ONECUT2,SFMBT2,TWIST1,ECE2,PAX2,RIMKLB,USP11,ASL,SLC29A4,EMID1,EBF4,PNCK,GDI1,PNMA3,GAP43,TUBB2A,TSPYL2,ASH2L,ACOT7,NRIP2,DYNC1I1,ZSCAN18,SAMD14,PAFAH1B3,ARL10,SMC4,TFAP2A,TBKBP1,BEX1,MAGED1,SCAPER,SKOR1,WDR6,ARXES2,SRSF5,EEF1A1,RAB34,FKBP14,SMARCA1,FAF1,TRMT2B,SOX3,HSP90AB1,HSDL1,CCT3,RDX,DPYSL3,ZFP28,SNCAIP,MACROD1,ZMAT1,REM2,SEC24D,ACHE,RSRP1,PRPS1L3,CGREF1,NFYA,NT5E,NINJ1,IRX5,SRSF2,BBS2,CDC4…
TF	Factor: CREM; motif: TGACGTCASYN	TF:M01820	0.00555633	2.25521	5764	663	227	21833	ONECUT2,ECE2,GPRASP1,USP11,EN2,OPTN,PNMA3,TUBB2A,TSPYL2,KLHL4,ZCCHC18,ACOT7,ZSCAN18,MORF4L2,SMC4,SCAPER,SKOR1,ANAPC5,SKAP2,SRSF5,EEF1A1,RANBP17,SOX3,HSP90AB1,CD200,MMAB,SEC24D,ACHE,RSRP1,NFYA,STAT6,NINJ1,BBS2,RIT2,TUFT1,SAMHD1,GKAP1,DUS2,RNF25,TMEM43,CCT5,ADAM15,MID2,VBP1,GAA,SUV39H1,PGRMC1,SYNGR3,GGACT,MAGED2,DLX2,LTA4H,IZUMO4,AHSA2,TCEAL3,COX20,MRI1,TCP11L2,MAPK3,INPP5F,CHL1,STAT4,PHF1,ST7,MYEF…
TF	Factor: c-ets-1; motif: ACCGGAWRYN	TF:M01986	0.00563448	2.24915	8416	663	312	21833	PAX2,LGALS8,RIMKLB,USP11,ASL,SLC29A4,EMID1,PNCK,OPTN,PNMA3,TUBB2A,ASH2L,ACOT7,DYNC1I1,SAMD14,PAFAH1B3,SCAPER,DPYSL5,SRSF5,HSP90AA1,RAB34,PRMT2,HSP90AB1,ZFP28,APEH,ELAC1,STIL,SAT2,ACHE,RSRP1,PRPS1L3,NFYA,WDR41,STAT6,NINJ1,SRSF2,BBS2,RRAGB,CDC45,ARMCX4,PRR13,TUFT1,MSTO1,TSPYL3,GKAP1,OTOGL,ORC3,RNF25,NAGK,UCKL1,CCT5,CENPC1,ADAM15,CORO1C,DLX4,RRM2B,VBP1,GAA,SUV39H1,PGRMC1,HAUS4,SYNGR3,TPX2,MAGED2,PRI…
TF	Factor: CREB,; motif: NTGACGTNA; match class: 1	TF:M00981_1	0.00655558	2.18339	2763	663	124	21833	ONECUT2,ECE2,GPRASP1,PNMA3,TUBB2A,TSPYL2,ZCCHC18,ACOT7,ZSCAN18,MORF4L2,BEX1,WDR6,SKAP2,ARXES2,EEF1A1,EIF2S3Y,HSP90AB1,HSDL1,MMAB,SEC24D,STAT6,NINJ1,BBS2,RRAGB,CDC45,RIT2,DUS2,TMEM43,GAA,PGRMC1,SYNGR3,MRI1,TCP11L2,PHF1,ST7,NELFB,TPPP3,METAP1D,MAST1,ZWINT,HEXIM2,ATAT1,CEP57,ZFP711,COG5,CEP120,LATS2,ZFP273,FRMD3,NAP1L5,ZFP712,ATG16L2,NAP1L3,RAPGEF6,PNRC1,RNPC3,PPFIA1,RCCD1,SPR,DZIP3,ABRACL,GTF2H2,IS…
TF	Factor: ELF4; motif: CCCGGAARTN	TF:M01979	0.00703107	2.15298	7202	663	273	21833	PAX2,USP11,ASL,EMID1,CDH18,ASH2L,ACOT7,SAMD14,PAFAH1B3,SMC4,DPYSL5,WDR6,SRSF5,RAB34,SMARCA1,PRMT2,HSP90AB1,ZFP28,APEH,ELAC1,SEC24D,ACHE,PRPS1L3,NFYA,WDR41,STAT6,NINJ1,SRSF2,BBS2,RRAGB,CDC45,PRR13,SAMHD1,MSTO1,GKAP1,ORC3,RNF25,NAGK,UCKL1,CCT5,CENPC1,DPP7,CORO1C,NRBP1,DLX4,RRM2B,VBP1,SUV39H1,PGRMC1,GGACT,TPX2,MAGED2,PRIM1,IZUMO4,AHSA2,TERF2IP,COX20,MRI1,FCHSD1,9930104L06RIK,MLH3,TELO2,TRPC4,VWA3A,Z…
TF	Factor: ATF-1; motif: TNACGTCAN	TF:M01861	0.00772623	2.11203	6279	663	243	21833	ONECUT2,TWIST1,ECE2,GPRASP1,RIMKLB,USP11,EN2,OPTN,PNMA3,TUBB2A,TSPYL2,KLHL4,ZCCHC18,ACOT7,ZSCAN18,MORF4L2,SMC4,TBKBP1,SCAPER,SKOR1,WDR6,SKAP2,ARXES2,SRSF5,EEF1A1,RANBP17,SMARCA1,EIF2S3Y,SOX3,HSP90AB1,HSDL1,GRB10,CD200,SNCAIP,STIL,SAT2,MMAB,SEC24D,ACHE,RSRP1,PRPS1L3,STAT6,NINJ1,BBS2,RRAGB,CDC45,RIT2,SAMHD1,DUS2,TMEM43,ADAM15,DNAJC12,VBP1,GAA,SUV39H1,PGRMC1,SYNGR3,GGACT,MAGED2,DLX2,LTA4H,AHSA2,COX2…
TF	Factor: KLF3; motif: NNNNNNGGGCGGGGCNNGN; match class: 1	TF:M10278_1	0.00779305	2.10829	3138	663	137	21833	ONECUT2,LGALS8,RIMKLB,SLC29A4,EMID1,EBF4,GDI1,PNMA3,ACOT7,SAMD14,PAFAH1B3,MORF4L2,DGKA,SCAPER,COL5A3,ANAPC5,SKAP2,HSP90AA1,TMEM117,SMARCA1,HSP90AB1,GRB10,APEH,ZMAT1,ACHE,PRPS1L3,WDR41,NT5E,SRSF2,ZFP157,CD99L2,GKAP1,GPI1,STK3,ADAM15,DPP7,CORO1C,NRBP1,RRM2B,PGRMC1,HAUS4,AHSA2,TCP11L2,MAPK3,FCHSD1,INPP5F,ACAA1A,PHF1,FPGS,HDAC1,TRO,HCN3,MAST1,LYRM9,KIZ,AIFM2,SGSH,KHNYN,CCT2,SLC25A38,PRKRA,ASCC1,CCDC1…
TF	Factor: Kaiso; motif: GCMGGGRGCRGS	TF:M03876	0.00784405	2.10546	11154	663	395	21833	ONECUT2,SFMBT2,TWIST1,FHL1,GPRASP1,PAX2,LGALS8,GPRASP2,RIMKLB,USP11,RGS13,SLC29A4,EMID1,EBF4,PNCK,GDI1,EN2,OPTN,ZFP503,PNMA3,GAP43,CDH18,TUBB2A,TSPYL2,ASH2L,ZCCHC18,ACOT7,SAMD14,PAFAH1B3,MORF4L2,DGKA,ARL10,SMC4,TFAP2A,TBKBP1,BEX1,UCMA,MAGED1,SCAPER,COL5A3,SKOR1,DPYSL5,WDR6,SKAP2,ARXES2,HSP90AA1,EEF1A1,RAB34,RANBP17,FAF1,TRMT2B,PRMT2,SOX3,HSP90AB1,HSDL1,CCT3,GRB10,CD200,RDX,DPYSL3,APEH,SNCAIP,ELAC…
TF	Factor: LKLF; motif: CNCCACCCS	TF:M08819	0.0078512	2.10506	5821	663	228	21833	ONECUT2,SFMBT2,TWIST1,GPRASP1,RIMKLB,USP11,PNCK,GDI1,OPTN,ZFP503,PNMA3,GAP43,CDH18,ASH2L,PAFAH1B3,MORF4L2,TBKBP1,SCAPER,DPYSL5,SKAP2,SRSF5,RAB34,FAF1,EIF2S3Y,TRMT2B,HSP90AB1,GRB10,DPYSL3,SNCAIP,SAT2,ZMAT1,REM2,NT5E,NINJ1,IRX5,PODXL2,RIT2,CD99L2,ARMCX4,TSPYL3,RHOU,CYB5R1,TAOK3,RNF25,CENPC1,ADAM15,DLX4,TMEM255A,SYNGR3,GGACT,MAGED2,RAB27A,DLX2,LTA4H,AHSA2,TCEAL3,COX20,PABPN1,DMRT2,MLH3,TUBA1A,TELO2,…
TF	Factor: Klf7; motif: NNNRCCMCGCCCNNNN	TF:M02773	0.00816276	2.08816	4208	663	174	21833	ONECUT2,LGALS8,RIMKLB,ASL,SLC29A4,EBF4,PNCK,GAP43,SAMD14,PAFAH1B3,DGKA,SMC4,SCAPER,COL5A3,ANAPC5,HSP90AA1,SMARCA1,FAF1,EIF2S3Y,TRMT2B,HSP90AB1,CCT3,ZFP28,APEH,SEC24D,NFYA,WDR41,SRSF2,BBS2,CD99L2,TUFT1,GPI1,STK3,ACADVL,NAGK,ADAM15,DPP7,CORO1C,NRBP1,RRM2B,PGRMC1,HAUS4,SYNGR3,AHSA2,TERF2IP,TCP11L2,MAPK3,TTC28,FCHSD1,TUBA1A,PHF1,MYEF2,TRPC4,HDAC1,TRO,NELFB,LYRM9,KIZ,PRDX3,AIFM2,NAA16,SGSH,CCT2,HEXIM2…
TF	Factor: E2F-1; motif: TTTSGCGCGMNR	TF:M00516	0.00935404	2.029	6018	663	234	21833	TWIST1,FHL1,ECE2,GPRASP1,LGALS8,GPRASP2,USP11,EN2,PNMA3,TUBB2A,TSPYL2,ZCCHC18,ACOT7,NRIP2,ZSCAN18,SAMD14,ARL10,MAGED1,SCAPER,COL5A3,GSPT2,SKAP2,SRSF5,RAB34,RANBP17,SMARCA1,FAF1,TRMT2B,SOX3,HSP90AB1,CCT3,ZFP28,STIL,MACROD1,ZMAT1,SEC24D,PRPS1L3,NFYA,WDR41,STAT6,NINJ1,IRX5,SRSF2,PODXL2,CDC45,ARMCX4,TUFT1,SAMHD1,MSTO1,GKAP1,GPI1,ORC3,DUS2,HS6ST2,NAGK,CCT5,CORO1C,TMEM255A,SYNGR3,MAGED2,RAB27A,DLX2,FAM…
TF	Factor: Elk-1; motif: NCCGGAAGTGN	TF:M10219	0.0097756	2.00986	14568	663	494	21833	ONECUT2,SFMBT2,TWIST1,GPRASP1,PAX2,RIMKLB,USP11,ASL,SLC29A4,EMID1,EN2,OPTN,NDN,GAP43,CDH18,TUBB2A,ASH2L,KLHL4,ZCCHC18,ACOT7,DYNC1I1,ZSCAN18,SAMD14,PAFAH1B3,MORF4L2,DGKA,ARL10,TBKBP1,MAGED1,SCAPER,SKOR1,DPYSL5,ANAPC5,GSPT2,WDR6,SKAP2,ARXES2,SRSF5,HSP90AA1,EEF1A1,RAB34,SMARCA1,FAF1,EIF2S3Y,TRMT2B,PRMT2,HSP90AB1,HSDL1,CCT3,GRB10,CD200,RDX,ZFP28,APEH,ELAC1,STIL,SAT2,ZMAT1,SEC24D,ACHE,PRPS1L3,NFYA,WDR…
TF	Factor: CREB; motif: NNTKACGTCANNNS	TF:M00916	0.0102641	1.98868	5903	663	230	21833	ONECUT2,TWIST1,ECE2,GPRASP1,RIMKLB,USP11,EN2,OPTN,PNMA3,TUBB2A,TSPYL2,ZCCHC18,ACOT7,ZSCAN18,MORF4L2,TBKBP1,BEX1,SCAPER,SKOR1,WDR6,SKAP2,ARXES2,SRSF5,EEF1A1,RANBP17,SMARCA1,EIF2S3Y,SOX3,HSP90AB1,HSDL1,GRB10,CD200,SNCAIP,STIL,SAT2,MMAB,SEC24D,ACHE,RSRP1,PRPS1L3,NINJ1,BBS2,RRAGB,CDC45,RIT2,SAMHD1,DUS2,BEX4,TMEM43,ADAM15,DNAJC12,VBP1,GAA,PGRMC1,SYNGR3,GGACT,DLX2,LTA4H,AHSA2,MRI1,MAPK3,INPP5F,CHL1,STA…
TF	Factor: ZAC; motif: KGGGCCR	TF:M05547	0.0106915	1.97096	6707	663	256	21833	ONECUT2,PAX2,RIMKLB,SLC29A4,EBF4,PNCK,SAMD14,MORF4L2,DGKA,TFAP2A,TBKBP1,BEX1,MAGED1,SKOR1,WDR6,RAB34,TMEM117,RANBP17,SOX3,GRB10,SNCAIP,STIL,MACROD1,SEC24D,ACHE,RSRP1,PRPS1L3,NFYA,WDR41,IRX5,RRAGB,PODXL2,HSD17B11,ARMCX4,SAMHD1,TSPYL3,GKAP1,GPI1,ORC3,BEX4,NAGK,UCKL1,ADAM15,CORO1C,RRM2B,GAA,SUV39H1,SYNGR3,MAGED2,DLX2,LTA4H,IZUMO4,COX20,MRI1,TCP11L2,PABPN1,MAPK3,TTC28,TIA1,INPP5F,STK33,RNF2,PRPSAP1,M…
TF	Factor: WT1; motif: SMCNCCNSC	TF:M01118	0.0109543	1.96041	8123	663	301	21833	ONECUT2,SFMBT2,TWIST1,ECE2,PAX2,GPRASP2,RIMKLB,EBF4,PNCK,GDI1,EN2,ZFP503,PNMA3,TUBB2A,TSPYL2,ASH2L,KLHL4,ZCCHC18,DYNC1I1,ZSCAN18,SAMD14,PAFAH1B3,MORF4L2,CCDC39,SMC4,TFAP2A,TBKBP1,BEX1,MAGED1,SCAPER,COL5A3,SKOR1,ANAPC5,WDR6,ARXES2,SRSF5,HSP90AA1,EEF1A1,RANBP17,FKBP14,SMARCA1,FAF1,TRMT2B,SOX3,HSP90AB1,HSDL1,CCT3,DPYSL3,SNCAIP,ZMAT1,REM2,RSRP1,PRPS1L3,CGREF1,NT5E,CTXN3,STAT6,NINJ1,IRX5,SRSF2,BBS2,PO…
TF	Factor: SP100; motif: NNCGTCGNNTAAWNN	TF:M02913	0.0117521	1.92988	8512	663	313	21833	SFMBT2,TWIST1,PAX2,RIMKLB,USP11,ASL,SLC29A4,EBF4,EN2,ZFP503,PNMA3,TUBB2A,ASH2L,SAMD14,CCDC39,TBKBP1,BEX1,MAGED1,SCAPER,SKOR1,DPYSL5,ANAPC5,GSPT2,SRSF5,HSP90AA1,EEF1A1,RAB34,FKBP14,SMARCA1,FAF1,EIF2S3Y,TRMT2B,PRMT2,SOX3,HSP90AB1,CCT3,GRB10,APEH,ZMAT1,ACHE,RSRP1,PRPS1L3,CGREF1,NFYA,WDR41,NT5E,NINJ1,IRX5,SRSF2,BBS2,RRAGB,PODXL2,CDC45,ARMCX4,TUFT1,TSPYL3,RHOU,STK3,CYB5R1,ACADVL,HS6ST2,BEX4,TMEM43,MAO…
TF	Factor: YY1; motif: CAARATGGCGGC	TF:M10408	0.0118539	1.92614	5126	663	204	21833	SFMBT2,LGALS8,GPRASP2,USP11,EMID1,GDI1,ZFP503,TUBB2A,TSPYL2,PAFAH1B3,MORF4L2,SMC4,TFAP2A,PSME1,SCAPER,SKAP2,SRSF5,HSP90AA1,EEF1A1,RANBP17,EIF2S3Y,SOX3,HSP90AB1,HSDL1,CCT3,RDX,MMAB,ZMAT1,SEC24D,RSRP1,NFYA,WDR41,SRSF2,BBS2,ZFP157,PODXL2,RIT2,CD99L2,SAMHD1,RNF25,TMEM43,MID2,VBP1,GAA,SUV39H1,FAM219B,LTA4H,TCEAL3,TERF2IP,COX20,PABPN1,MAPK3,TTC28,TIA1,INPP5F,9930104L06RIK,RNF2,PHF1,ST7,PRPSAP1,MYEF2,ZF…
TF	Factor: CKROX; motif: SCCCTCCCC	TF:M01175	0.0122569	1.91162	6347	663	244	21833	ONECUT2,SFMBT2,TWIST1,FHL1,ECE2,GPRASP1,PAX2,GPRASP2,RIMKLB,USP11,ASL,EBF4,PNCK,GDI1,EN2,ZFP503,PNMA3,TUBB2A,ASH2L,KLHL4,ZCCHC18,ZSCAN18,PAFAH1B3,MORF4L2,CCDC39,SMC4,TFAP2A,TBKBP1,SCAPER,COL5A3,SKOR1,ANAPC5,WDR6,SKAP2,ARXES2,SRSF5,EEF1A1,RANBP17,SMARCA1,TRMT2B,PRMT2,HSP90AB1,HSDL1,CCT3,GRB10,ZMAT1,REM2,ACHE,PRPS1L3,CGREF1,STAT6,IRX5,SRSF2,BBS2,CD99L2,HSD17B11,ARMCX4,TSPYL3,STK3,CYB5R1,TAOK3,RNF25…
TF	Factor: AP-2alpha; motif: NGCCYSNNGSN	TF:M01857	0.0130297	1.88507	6198	663	239	21833	ONECUT2,SFMBT2,PAX2,LGALS8,RIMKLB,SLC29A4,EMID1,EBF4,PNCK,TSPYL2,ASH2L,DYNC1I1,SAMD14,TFAP2A,BEX1,MAGED1,COL5A3,WDR6,SRSF5,HSP90AA1,EEF1A1,RAB34,TMEM117,RANBP17,PRMT2,SOX3,GRB10,RDX,DPYSL3,APEH,SNCAIP,MMAB,REM2,SEC24D,ACHE,WDR41,NT5E,NINJ1,IRX5,SRSF2,BBS2,PODXL2,RIT2,ARMCX4,PRR13,RHOU,GKAP1,GPI1,STK3,ACADVL,BEX4,MAOA,UCKL1,CCT5,ADAM15,CORO1C,NRBP1,SUV39H1,PGRMC1,GGACT,TPX2,RAB27A,DLX2,FAM219B,IZU…
TF	Factor: NRF-1; motif: YGCGCMTGCGC	TF:M02102	0.0132501	1.87778	2060	663	97	21833	SMC4,MAGED1,SCAPER,SRSF5,HSP90AA1,PRMT2,HSDL1,STIL,RSRP1,SRSF2,BBS2,PODXL2,SAMHD1,TMEM43,NAGK,CCT5,CORO1C,TMEM255A,SUV39H1,HAUS4,FAM219B,TERF2IP,MRI1,TIA1,MLH3,ACAA1A,TELO2,PHF1,LYRM9,NAA16,HSPA8,2610008E11RIK,CHRNB2,ABCB10,TCAIM,VDAC3,SETD6,ZFP711,MTSS1,CCAR1,CEP120,ATAD3A,SNX4,RALGPS2,STAG1,SRSF1,RAPGEF6,THAP3,PNRC1,ABHD14B,RNPC3,HFM1,PPFIA1,ISOC1,ZFP866,DNAJC17,ARPC5,SIRT5,POLA2,PIM2,ME2,PWP1,…
TF	Factor: Osx; motif: CCNCCCCCNNN	TF:M07329	0.0141574	1.84902	6174	663	238	21833	ONECUT2,TWIST1,ECE2,PAX2,RIMKLB,EMID1,EBF4,PNCK,GDI1,OPTN,TSPYL2,ZCCHC18,SAMD14,MORF4L2,SMC4,TFAP2A,TBKBP1,BEX1,MAGED1,PSME1,SKOR1,ANAPC5,WDR6,HSP90AA1,EEF1A1,RAB34,FKBP14,SMARCA1,FAF1,TRMT2B,SOX3,HSP90AB1,HSDL1,GRB10,CD200,APEH,SNCAIP,SAT2,ZMAT1,SEC24D,ACHE,CGREF1,NFYA,WDR41,NINJ1,BBS2,PODXL2,CD99L2,ARMCX4,TUFT1,MSTO1,GKAP1,GPI1,ORC3,PRSS16,BEX4,TMEM43,CCT5,CENPC1,CORO1C,NRBP1,TMEM255A,GAA,PGRMC…
TF	Factor: Kid3; motif: CCACN; match class: 1	TF:M01160_1	0.0145502	1.83713	21167	663	659	21833	ONECUT2,SFMBT2,TWIST1,FHL1,ECE2,GPRASP1,PAX2,LGALS8,GPRASP2,RIMKLB,USP11,ASL,RGS13,SLC29A4,EMID1,EBF4,PNCK,GDI1,EN2,OPTN,ZFP503,PNMA3,GAP43,CDH18,TUBB2A,TSPYL2,ASH2L,KLHL4,ZCCHC18,ACOT7,NRIP2,DYNC1I1,ZSCAN18,SAMD14,PAFAH1B3,MORF4L2,CCDC39,DGKA,ARL10,SMC4,TFAP2A,TBKBP1,BEX1,UCMA,MAGED1,PSME1,SCAPER,COL5A3,SKOR1,DPYSL5,ANAPC5,GSPT2,WDR6,SKAP2,ARXES2,SRSF5,HSP90AA1,EEF1A1,RAB34,TMEM117,RANBP17,FKBP1…
TF	Factor: Pax-4; motif: NNNNNYCACCCB	TF:M00378	0.0157671	1.80225	18733	663	605	21833	ONECUT2,SFMBT2,TWIST1,FHL1,ECE2,GPRASP1,PAX2,LGALS8,GPRASP2,RIMKLB,USP11,ASL,RGS13,SLC29A4,EMID1,EBF4,PNCK,GDI1,EN2,OPTN,ZFP503,PNMA3,GAP43,CDH18,TUBB2A,TSPYL2,ASH2L,ZCCHC18,ACOT7,NRIP2,DYNC1I1,ZSCAN18,SAMD14,PAFAH1B3,MORF4L2,CCDC39,DGKA,ARL10,TFAP2A,TBKBP1,BEX1,UCMA,MAGED1,PSME1,SCAPER,COL5A3,SKOR1,DPYSL5,ANAPC5,GSPT2,WDR6,SKAP2,ARXES2,SRSF5,HSP90AA1,EEF1A1,RAB34,TMEM117,RANBP17,FKBP14,SMARCA1,F…
TF	Factor: MAZ; motif: NKGGGAGGGGRGGR	TF:M02023	0.0162299	1.78968	7967	663	295	21833	ONECUT2,SFMBT2,TWIST1,FHL1,ECE2,PAX2,GPRASP2,RIMKLB,EBF4,PNCK,GDI1,EN2,OPTN,PNMA3,ASH2L,KLHL4,ZCCHC18,ACOT7,ZSCAN18,SAMD14,PAFAH1B3,MORF4L2,DGKA,TBKBP1,MAGED1,SCAPER,SKOR1,DPYSL5,WDR6,SKAP2,SRSF5,HSP90AA1,EEF1A1,RAB34,FKBP14,SMARCA1,TRMT2B,HSP90AB1,HSDL1,CCT3,GRB10,DPYSL3,SNCAIP,ZMAT1,REM2,SEC24D,ACHE,RSRP1,PRPS1L3,NT5E,CTXN3,IRX5,SRSF2,BBS2,CD99L2,HSD17B11,ARMCX4,TUFT1,GKAP1,GPI1,STK3,PRSS16,DUS…
TF	Factor: SP4; motif: NNWAGGCGTGNCNNN	TF:M02914	0.0163245	1.78716	4940	663	197	21833	SFMBT2,TWIST1,USP11,ASL,SLC29A4,EN2,OPTN,TUBB2A,ASH2L,ACOT7,SAMD14,PAFAH1B3,MORF4L2,TFAP2A,BEX1,UCMA,PSME1,COL5A3,SKAP2,SRSF5,RANBP17,PRMT2,HSP90AB1,HSDL1,CCT3,GRB10,DPYSL3,ZFP28,APEH,SAT2,ZMAT1,RSRP1,STAT6,NINJ1,TUFT1,SAMHD1,MSTO1,STK3,TAOK3,RNF25,UCKL1,CENPC1,CORO1C,CREB3L3,DLX4,RRM2B,DNAJC12,VBP1,GAA,SUV39H1,GGACT,RAB27A,FAM219B,PRIM1,IZUMO4,COX20,MLH3,RNF2,TUBA1A,TELO2,PHF1,TRPC4,FPGS,VASP,HC…
TF	Factor: AP-2; motif: SNNNCCNCAGGCN	TF:M00915	0.017179	1.765	7121	663	268	21833	ONECUT2,ECE2,PAX2,GPRASP2,RIMKLB,SLC29A4,EMID1,EBF4,PNCK,EN2,OPTN,ZFP503,CDH18,TSPYL2,ZCCHC18,ACOT7,ZSCAN18,SAMD14,SMC4,TFAP2A,MAGED1,PSME1,SCAPER,SKOR1,WDR6,ARXES2,HSP90AA1,RAB34,TMEM117,RANBP17,FAF1,SOX3,GRB10,DPYSL3,ELAC1,CGREF1,WDR41,NT5E,NINJ1,RRAGB,PODXL2,CDC45,CD99L2,ARMCX4,TUFT1,SAMHD1,GKAP1,GPI1,CYB5R1,DUS2,HS6ST2,TMEM43,MAOA,NAGK,UCKL1,CORO1C,NRBP1,DNAJC12,PGRMC1,GGACT,RAB27A,FAM219B,LT…
TF	Factor: GATA-1; motif: SNNGATNNNN	TF:M00075	0.0180992	1.74234	6720	663	255	21833	ONECUT2,TWIST1,ECE2,GPRASP1,USP11,SLC29A4,GDI1,OPTN,ACOT7,NRIP2,TBKBP1,UCMA,COL5A3,ANAPC5,WDR6,EEF1A1,RAB34,RANBP17,FKBP14,SMARCA1,HSP90AB1,GRB10,ZFP28,ELAC1,SAT2,MMAB,MACROD1,ACHE,RSRP1,PRPS1L3,CGREF1,NT5E,RRAGB,ZFP157,CDC45,CD99L2,HSD17B11,TUFT1,MSTO1,TSPYL3,ACADVL,RNF25,BEX4,TMEM43,MAOA,ADAM15,DPP7,CORO1C,RRM2B,TMEM255A,SUV39H1,SYNGR3,GGACT,PRIM1,IZUMO4,AHSA2,COX20,MRI1,PABPN1,MAPK3,TIA1,INPP5…
TF	Factor: MAX; motif: NNGNCACGCGACNN	TF:M02881	0.0189634	1.72208	5434	663	213	21833	SLC29A4,EMID1,EN2,ZCCHC18,ACOT7,DYNC1I1,SAMD14,DGKA,ARL10,BEX1,UCMA,SKOR1,ANAPC5,GSPT2,ARXES2,SRSF5,EEF1A1,TMEM117,FAF1,SOX3,HSP90AB1,HSDL1,GRB10,DPYSL3,APEH,STIL,MACROD1,SEC24D,NFYA,NT5E,IRX5,SRSF2,BBS2,RRAGB,PODXL2,CDC45,HSD17B11,SAMHD1,MSTO1,TSPYL3,GPI1,STK3,TAOK3,RNF25,BEX4,NAGK,UCKL1,CCT5,ADAM15,DPP7,CORO1C,CREB3L3,RRM2B,GAA,PGRMC1,SYNGR3,DLX2,FAM219B,TERF2IP,COX20,PABPN1,DMRT2,TIA1,STK33,PO…
TF	Factor: LKLF; motif: GGGGTGGKSN; match class: 1	TF:M07261_1	0.0265449	1.57602	3792	663	157	21833	ONECUT2,TWIST1,RIMKLB,PNCK,GDI1,OPTN,ZFP503,TSPYL2,ASH2L,PAFAH1B3,MORF4L2,TBKBP1,MAGED1,PSME1,SKOR1,DPYSL5,SMARCA1,SOX3,HSP90AB1,GRB10,DPYSL3,SNCAIP,SAT2,ZMAT1,REM2,CTXN3,NINJ1,IRX5,RIT2,CD99L2,ARMCX4,CYB5R1,RNF25,CENPC1,ADAM15,DLX4,TMEM255A,SYNGR3,GGACT,LTA4H,IZUMO4,AHSA2,COX20,PABPN1,MLH3,ACAA1A,TUBA1A,ST7,HDAC1,VASP,TRO,TPPP3,SPARC,LYRM9,HSPA8,LIN28B,SGSH,KHNYN,AGPAT4,ECHDC2,LBX1,SYNC,BCAP31,I…
TF	Factor: KLF; motif: GGGNGGGG	TF:M07461	0.0356186	1.44832	8517	663	310	21833	ONECUT2,SFMBT2,TWIST1,GPRASP1,RIMKLB,USP11,EBF4,PNCK,GDI1,OPTN,ZFP503,PNMA3,GAP43,CDH18,TSPYL2,ASH2L,ZSCAN18,PAFAH1B3,MORF4L2,TBKBP1,SCAPER,DPYSL5,SKAP2,SRSF5,HSP90AA1,EEF1A1,RAB34,TMEM117,FAF1,EIF2S3Y,TRMT2B,HSP90AB1,GRB10,DPYSL3,APEH,SNCAIP,SAT2,MACROD1,ZMAT1,REM2,SEC24D,ACHE,PRPS1L3,NT5E,NINJ1,IRX5,PODXL2,RIT2,CD99L2,ARMCX4,PRR13,TUFT1,TSPYL3,RHOU,CYB5R1,TAOK3,RNF25,NAGK,CCT5,CENPC1,ADAM15,COR…
TF	Factor: C-Myc; motif: NGCCACGTGNN	TF:M07601	0.0437463	1.35906	6207	663	236	21833	FHL1,LGALS8,USP11,EMID1,EN2,PNMA3,TUBB2A,ASH2L,KLHL4,ZSCAN18,MORF4L2,TFAP2A,TBKBP1,BEX1,SCAPER,SRSF5,HSP90AA1,RAB34,RANBP17,FAF1,EIF2S3Y,TRMT2B,SOX3,HSP90AB1,HSDL1,CCT3,GRB10,ZFP28,MACROD1,ACHE,CGREF1,WDR41,SRSF2,RRAGB,PODXL2,ARMCX4,MSTO1,TSPYL3,CYB5R1,HS6ST2,TAOK3,RNF25,BEX4,TMEM43,MAOA,CENPC1,DPP7,CORO1C,CREB3L3,DLX4,GAA,DLX2,LTA4H,IZUMO4,TCEAL3,TCP11L2,9930104L06RIK,MLH3,TELO2,ST7,PRPSAP1,MYEF…
TF	Factor: MAZ; motif: GGGGAGGG; match class: 1	TF:M00649_1	0.0443427	1.35318	3047	663	130	21833	SFMBT2,TWIST1,GPRASP1,PAX2,RIMKLB,USP11,ASL,EBF4,GDI1,EN2,PNMA3,TSPYL2,ASH2L,ZCCHC18,PAFAH1B3,MORF4L2,SMC4,TBKBP1,BEX1,MAGED1,SCAPER,SKOR1,ANAPC5,WDR6,ARXES2,HSP90AA1,EEF1A1,SMARCA1,HSP90AB1,HSDL1,REM2,STAT6,SRSF2,ARMCX4,CYB5R1,ADAM15,TMEM255A,MAGED2,DLX2,LTA4H,TCP11L2,RNF2,ACAA1A,TUBA1A,ST7,POLR3GL,HDAC1,VASP,TRO,ABCA8A,HOXD8,HDAC2,MAST1,HSPA8,LIN28B,SGSH,SLC25A38,SYNC,SETD6,BCAP31,ZFP3,TFR2,ARR…
TF	Factor: GLI; motif: NSTGGGTGGTCY	TF:M10254	0.0449138	1.34762	9866	663	351	21833	ECE2,GPRASP2,SLC29A4,EMID1,EBF4,PNCK,OPTN,TUBB2A,TSPYL2,ASH2L,ZCCHC18,NRIP2,DYNC1I1,ZSCAN18,SAMD14,PAFAH1B3,DGKA,ARL10,TBKBP1,BEX1,UCMA,MAGED1,SKOR1,ANAPC5,GSPT2,WDR6,SKAP2,SRSF5,HSP90AA1,RAB34,FKBP14,SMARCA1,TRMT2B,HSP90AB1,HSDL1,GRB10,CD200,RDX,ZFP28,SNCAIP,ELAC1,MACROD1,ZMAT1,ACHE,PRPS1L3,NFYA,NT5E,CTXN3,IRX5,ZFP157,PODXL2,HSD17B11,ARMCX4,TSPYL3,STK3,CYB5R1,ACADVL,HS6ST2,TAOK3,RNF25,BEX4,TMEM4…
