# Supplementary material for: Identifying Disease Signatures in the Spinocerebellar Ataxia Type 1 Mouse Cortex
Source: Cells. 2022 Aug 24;11(17):2632. doi: 10.3390/cells11172632 (PMC9454518; doi:10.3390/cells11172632)
Supplement: Supplementary file 1 [file cells-11-02632-s001.zip › Luttik et al._Table S4 [Shared and Unique GO of downregulated DEGs in SCA1 cortex and cerebellum].xlsx]

## Sheet: GO-BP Down
source	term_name	term_id	term_size	effective_domain_size		p_adj_color	adjusted_p_value__CX_Down	query_size__CX_Down	intersection_size__CX_Down	gene_ratio_CX_Down		p_adj_color	adjusted_p_value__CB_Down	query_size__CB_Down	intersection_size__CB_Down	gene_ratio_CB_Down
GO:BP	localization	GO:0051179	6297	27543		5.28e-87	5.28e-87	1642	733	0.446407		9.59e-28	9.59e-28	779	321	0.412067
GO:BP	system development	GO:0048731	4533	27543		5.84e-87	5.84e-87	1756	624	0.355353		6.57e-27	6.57e-27	851	273	0.320799
GO:BP	nervous system development	GO:0007399	2479	27543		3.04e-85	3.04e-85	1693	419	0.24749		3.13e-37	3.13e-37	811	199	0.245376
GO:BP	multicellular organism development	GO:0007275	5045	27543		1.04e-78	1.04e-78	1752	649	0.370434		7.1e-25	7.1e-25	851	288	0.338425
GO:BP	anatomical structure development	GO:0048856	6186	27543		1.09e-77	1.09e-77	1756	740	0.421412		1.22e-19	1.22e-19	851	316	0.371328
GO:BP	regulation of localization	GO:0032879	2881	27543		2.79e-77	2.79e-77	1756	454	0.258542		1.01e-31	1.01e-31	813	207	0.254613
GO:BP	cell-cell signaling	GO:0007267	1690	27543		2.06e-76	2.06e-76	1397	289	0.206872		9.82e-42	9.82e-42	828	169	0.204106
GO:BP	regulation of biological quality	GO:0065008	4029	27543		6.95e-76	6.95e-76	1756	557	0.317198		6.17e-26	6.17e-26	813	242	0.297663
GO:BP	regulation of cellular process	GO:0050794	12487	27543		5.83e-74	5.83e-74	1756	1171	0.666856		1.91e-24	1.91e-24	872	553	0.634174
GO:BP	regulation of cell communication	GO:0010646	3453	27543		2.47e-73	2.47e-73	1756	500	0.284738		1.25e-18	1.25e-18	815	201	0.246626
GO:BP	developmental process	GO:0032502	6788	27543		3.57e-73	3.57e-73	1756	776	0.441913		5.2e-18	5.2e-18	878	341	0.388383
GO:BP	regulation of signaling	GO:0023051	3463	27543		6.91e-73	6.91e-73	1756	500	0.284738		7.42e-19	7.42e-19	815	202	0.247853
GO:BP	biological regulation	GO:0065007	14043	27543		1.03e-72	1.03e-72	1756	1263	0.719248		2.82e-20	2.82e-20	872	588	0.674312
GO:BP	synaptic signaling	GO:0099536	896	27543		1.08e-70	1.08e-70	1416	201	0.141949		6.7e-45	6.7e-45	825	125	0.151515
GO:BP	trans-synaptic signaling	GO:0099537	864	27543		1.14e-69	1.14e-69	1416	196	0.138418		1.6e-42	1.6e-42	801	118	0.147316
GO:BP	regulation of biological process	GO:0050789	13329	27543		7.05e-69	7.05e-69	1649	1148	0.69618		7.59e-21	7.59e-21	872	568	0.651376
GO:BP	anterograde trans-synaptic signaling	GO:0098916	856	27543		2.93e-67	2.93e-67	1416	192	0.135593		2.21e-41	2.21e-41	801	116	0.144819
GO:BP	chemical synaptic transmission	GO:0007268	856	27543		2.93e-67	2.93e-67	1416	192	0.135593		2.21e-41	2.21e-41	801	116	0.144819
GO:BP	neurogenesis	GO:0022008	1822	27543		3.31e-67	3.31e-67	1693	321	0.189604		1.02e-25	1.02e-25	811	146	0.180025
GO:BP	generation of neurons	GO:0048699	1587	27543		1.27e-66	1.27e-66	1722	298	0.173055		2.44e-23	2.44e-23	811	130	0.160296
GO:BP	neuron differentiation	GO:0030182	1514	27543		1.94e-65	1.94e-65	1722	288	0.167247		3.93e-23	3.93e-23	811	126	0.155364
GO:BP	cell development	GO:0048468	2426	27543		6.79e-65	6.79e-65	1736	383	0.220622		2.4e-19	2.4e-19	872	168	0.192661
GO:BP	anatomical structure morphogenesis	GO:0009653	2781	27543		7.17e-65	7.17e-65	1736	417	0.240207		1.01e-15	1.01e-15	834	169	0.202638
GO:BP	regulation of transport	GO:0051049	1872	27543		8.22e-60	8.22e-60	1432	283	0.197626		6.16e-31	6.16e-31	801	157	0.196005
GO:BP	cell morphogenesis	GO:0000902	1086	27543		9.42e-60	9.42e-60	1752	232	0.13242		2.18e-09	2.18e-09	858	80	0.0932401
GO:BP	cellular developmental process	GO:0048869	4678	27543		2.46e-59	2.46e-59	1756	575	0.327449		3.8e-12	3.8e-12	867	239	0.275663
GO:BP	cell differentiation	GO:0030154	4646	27543		3.44e-59	3.44e-59	1756	572	0.32574		1.7e-12	1.7e-12	867	239	0.275663
GO:BP	cell junction organization	GO:0034330	750	27543		1.23e-58	1.23e-58	1742	187	0.107348		1.49e-08	1.49e-08	849	61	0.0718492
GO:BP	neuron development	GO:0048666	1241	27543		3.54e-58	3.54e-58	1704	244	0.143192		4.33e-22	4.33e-22	858	114	0.132867
GO:BP	positive regulation of biological process	GO:0048518	6629	27543		9.1e-58	9.1e-58	1756	725	0.41287		1.23e-09	1.23e-09	816	286	0.35049
GO:BP	neuron projection development	GO:0031175	1085	27543		1.51e-57	1.51e-57	1704	225	0.132042		1.2e-19	1.2e-19	858	101	0.117716
GO:BP	synapse organization	GO:0050808	480	27543		2.86e-56	2.86e-56	1658	142	0.0856454		2.2e-11	2.2e-11	808	50	0.0618812
GO:BP	cell communication	GO:0007154	7546	27543		1.11e-55	1.11e-55	1490	693	0.465101		2.55e-20	2.55e-20	817	355	0.434517
GO:BP	modulation of chemical synaptic transmission	GO:0050804	645	27543		2.74e-55	2.74e-55	1416	152	0.107345		5.18e-27	5.18e-27	801	83	0.10362
GO:BP	regulation of trans-synaptic signaling	GO:0099177	646	27543		3.42e-55	3.42e-55	1416	152	0.107345		5.79e-27	5.79e-27	801	83	0.10362
GO:BP	signaling	GO:0023052	7473	27543		2.35e-54	2.35e-54	1490	685	0.459732		8.55e-21	8.55e-21	817	354	0.433293
GO:BP	transport	GO:0006810	4607	27543		4.03e-53	4.03e-53	1487	491	0.330195		1.68e-21	1.68e-21	848	261	0.307783
GO:BP	establishment of localization	GO:0051234	4762	27543		5.91e-53	5.91e-53	1489	502	0.337139		3.98e-21	3.98e-21	848	266	0.313679
GO:BP	cell morphogenesis involved in differentiation	GO:0000904	786	27543		5.99e-53	5.99e-53	1746	184	0.105384		5.51e-10	5.51e-10	811	64	0.0789149
GO:BP	cell projection morphogenesis	GO:0048858	696	27543		9.17e-52	9.17e-52	1736	170	0.0979263		9.13e-10	9.13e-10	811	59	0.0727497
GO:BP	plasma membrane bounded cell projection morphogenesis	GO:0120039	691	27543		8.33e-51	8.33e-51	1736	168	0.0967742		6.72e-10	6.72e-10	811	59	0.0727497
GO:BP	cell projection organization	GO:0030030	1627	27543		2.02e-50	2.02e-50	1704	272	0.159624		1.23e-15	1.23e-15	864	121	0.140046
GO:BP	positive regulation of cellular process	GO:0048522	6072	27543		3.21e-50	3.21e-50	1756	662	0.376993		1.86e-07	1.86e-07	816	258	0.316176
GO:BP	multicellular organismal process	GO:0032501	8766	27543		3.72e-50	3.72e-50	1756	859	0.48918		1.62e-20	1.62e-20	822	398	0.484185
GO:BP	plasma membrane bounded cell projection organization	GO:0120036	1589	27543		8e-50	8e-50	1704	267	0.15669		5.25e-16	5.25e-16	864	120	0.138889
GO:BP	cell part morphogenesis	GO:0032990	726	27543		1.11e-49	1.11e-49	1736	171	0.0985023		5.34e-09	5.34e-09	811	59	0.0727497
GO:BP	neuron projection morphogenesis	GO:0048812	676	27543		2.28e-49	2.28e-49	1736	164	0.09447		2.63e-10	2.63e-10	811	59	0.0727497
GO:BP	cellular component morphogenesis	GO:0032989	821	27543		1.27e-47	1.27e-47	1736	180	0.103687		2.01e-10	2.01e-10	858	69	0.0804196
GO:BP	regulation of molecular function	GO:0065009	3003	27543		2.75e-47	2.75e-47	1419	348	0.245243		1.53e-08	1.53e-08	832	156	0.1875
GO:BP	regulation of cellular component organization	GO:0051128	2398	27543		3.24e-47	3.24e-47	1697	339	0.199764		5.59e-08	5.59e-08	811	128	0.15783
GO:BP	negative regulation of cellular process	GO:0048523	5155	27543		4e-47	4e-47	1756	582	0.331435		0.000157934	0.000157934	352	107	0.303977
GO:BP	regulation of signal transduction	GO:0009966	2898	27543		6.83e-47	6.83e-47	1756	392	0.223235		2.28e-07	2.28e-07	522	104	0.199234
GO:BP	regulation of multicellular organismal process	GO:0051239	2854	27543		1.9e-46	1.9e-46	1756	387	0.220387		3.73e-13	3.73e-13	828	164	0.198068
GO:BP	ion transport	GO:0006811	1591	27543		1.94e-46	1.94e-46	1507	242	0.160584		1.21e-28	1.21e-28	821	141	0.171742
GO:BP	regulation of response to stimulus	GO:0048583	3926	27543		5.12e-46	5.12e-46	1756	479	0.272779		1.99962e-06	1.99962e-06	495	121	0.244444
GO:BP	regulation of ion transport	GO:0043269	723	27543		1.78e-45	1.78e-45	1746	165	0.0945017		1.55e-36	1.55e-36	821	102	0.124239
GO:BP	behavior	GO:0007610	741	27543		3.5e-45	3.5e-45	1749	167	0.0954831		3.45e-21	3.45e-21	791	80	0.101138
GO:BP	movement of cell or subcellular component	GO:0006928	2127	27543		1.13e-44	1.13e-44	1752	315	0.179795		7e-07	7e-07	543	85	0.156538
GO:BP	cation transport	GO:0006812	1185	27543		1.81e-44	1.81e-44	1507	200	0.132714		1.7e-25	1.7e-25	821	114	0.138855
GO:BP	cell morphogenesis involved in neuron differentiation	GO:0048667	623	27543		2.09e-44	2.09e-44	1736	150	0.0864055		3.31e-09	3.31e-09	858	56	0.0652681
GO:BP	intracellular signal transduction	GO:0035556	2516	27543		5.1e-43	5.1e-43	1754	348	0.198404		5.93e-07	5.93e-07	868	136	0.156682
GO:BP	locomotion	GO:0040011	1892	27543		3.33e-42	3.33e-42	1752	287	0.163813		4.09e-07	4.09e-07	362	60	0.165746
GO:BP	regulation of membrane potential	GO:0042391	465	27543		6.61e-42	6.61e-42	1487	116	0.0780094		2.29e-21	2.29e-21	792	63	0.0795455
GO:BP	animal organ development	GO:0048513	3856	27543		8.86e-42	8.86e-42	1756	462	0.263098		1.98653e-06	1.98653e-06	850	183	0.215294
GO:BP	regulation of developmental process	GO:0050793	2652	27543		4.76e-41	4.76e-41	1756	356	0.202733		4.6e-09	4.6e-09	878	150	0.170843
GO:BP	ion transmembrane transport	GO:0034220	1105	27543		2.02e-40	2.02e-40	1632	194	0.118873		5.74e-27	5.74e-27	821	112	0.136419
GO:BP	response to stimulus	GO:0050896	10393	27543		4.51e-40	4.51e-40	1602	869	0.542447		2.53e-13	2.53e-13	782	407	0.52046
GO:BP	negative regulation of biological process	GO:0048519	5996	27543		6.8e-40	6.8e-40	1756	626	0.356492		0.00501373	0.00501373	289	97	0.33564
GO:BP	metal ion transport	GO:0030001	904	27543		1.43e-39	1.43e-39	1632	171	0.104779		9.11e-20	9.11e-20	874	92	0.105263
GO:BP	cellular response to stimulus	GO:0051716	8778	27543		2.14e-38	2.14e-38	1592	759	0.476759		4.54e-10	4.54e-10	872	379	0.434633
GO:BP	cation transmembrane transport	GO:0098655	892	27543		5.94e-38	5.94e-38	1632	167	0.102328		2.34e-21	2.34e-21	874	94	0.107551
GO:BP	phosphorus metabolic process	GO:0006793	2797	27543		1.2e-36	1.2e-36	1756	358	0.203872		0.43566	0.43566	868	121	0.139401
GO:BP	signal transduction	GO:0007165	6896	27543		1.83e-36	1.83e-36	1756	682	0.388383		5.53e-14	5.53e-14	872	329	0.377294
GO:BP	inorganic ion transmembrane transport	GO:0098660	844	27543		2.6e-36	2.6e-36	1632	159	0.0974265		6.7e-22	6.7e-22	874	92	0.105263
GO:BP	phosphate-containing compound metabolic process	GO:0006796	2777	27543		3.68e-36	3.68e-36	1756	355	0.202164		0.485442	0.485442	868	120	0.138249
GO:BP	cell migration	GO:0016477	1505	27543		3.73e-36	3.73e-36	1752	236	0.134703		0.000782943	0.000782943	805	79	0.0981366
GO:BP	regulation of cell projection organization	GO:0031344	732	27543		4.71e-36	4.71e-36	1693	149	0.0880095		2.65e-07	2.65e-07	840	57	0.0678571
GO:BP	regulation of plasma membrane bounded cell projection organization	GO:0120035	716	27543		5.56e-36	5.56e-36	1693	147	0.0868281		3.29e-07	3.29e-07	840	56	0.0666667
GO:BP	inorganic cation transmembrane transport	GO:0098662	774	27543		1.45e-35	1.45e-35	1632	150	0.0919118		4.97e-19	4.97e-19	874	83	0.0949657
GO:BP	postsynapse organization	GO:0099173	209	27543		5.7e-35	5.7e-35	1549	73	0.0471272		0.336981	0.336981	807	17	0.0210657
GO:BP	regulation of neuron projection development	GO:0010975	528	27543		5.07e-34	5.07e-34	1693	121	0.0714708		3.7e-09	3.7e-09	840	50	0.0595238
GO:BP	regulation of ion transmembrane transport	GO:0034765	502	27543		3.55e-33	3.55e-33	1737	118	0.0679332		5.84e-26	5.84e-26	874	75	0.0858124
GO:BP	transmembrane transport	GO:0055085	1518	27543		7.67e-33	7.67e-33	1632	220	0.134804		1.58e-21	1.58e-21	874	129	0.147597
GO:BP	negative regulation of cell communication	GO:0010648	1371	27543		1.24e-32	1.24e-32	1737	214	0.123201		4.60608e-05	4.60608e-05	796	77	0.0967337
GO:BP	cell motility	GO:0048870	1697	27543		1.51e-32	1.51e-32	1752	247	0.140982		0.000425082	0.000425082	362	49	0.135359
GO:BP	localization of cell	GO:0051674	1697	27543		1.51e-32	1.51e-32	1752	247	0.140982		0.000425082	0.000425082	362	49	0.135359
GO:BP	negative regulation of signaling	GO:0023057	1375	27543		1.92e-32	1.92e-32	1737	214	0.123201		0.000110449	0.000110449	796	76	0.0954774
GO:BP	regulation of transmembrane transport	GO:0034762	595	27543		3.96e-32	3.96e-32	1632	124	0.0759804		1.11e-24	1.11e-24	874	80	0.0915332
GO:BP	phosphorylation	GO:0016310	1936	27543		4.03e-32	4.03e-32	1756	269	0.153189		0.0944384	0.0944384	293	40	0.136519
GO:BP	secretion	GO:0046903	1053	27543		6.79e-32	6.79e-32	1756	181	0.103075		3.32e-16	3.32e-16	801	89	0.111111
GO:BP	export from cell	GO:0140352	945	27543		3.36e-31	3.36e-31	1756	168	0.095672		5.42e-16	5.42e-16	816	84	0.102941
GO:BP	cellular localization	GO:0051641	2840	27543		5.36e-31	5.36e-31	1453	303	0.208534		1.03642e-05	1.03642e-05	813	137	0.168512
GO:BP	axonogenesis	GO:0007409	464	27543		8.01e-31	8.01e-31	1658	107	0.0645356		5.25e-07	5.25e-07	858	43	0.0501166
GO:BP	axon development	GO:0061564	516	27543		1.23e-30	1.23e-30	1736	116	0.0668203		1.37e-07	1.37e-07	858	47	0.0547786
GO:BP	positive regulation of developmental process	GO:0051094	1427	27543		2.87e-30	2.87e-30	1756	216	0.123007		2.92e-07	2.92e-07	828	88	0.10628
GO:BP	secretion by cell	GO:0032940	886	27543		7.56e-30	7.56e-30	1756	159	0.0905467		1.64e-15	1.64e-15	816	80	0.0980392
GO:BP	regulation of system process	GO:0044057	627	27543		4.25e-29	4.25e-29	1756	128	0.0728929		1.38e-17	1.38e-17	796	68	0.0854271
GO:BP	vesicle-mediated transport in synapse	GO:0099003	240	27543		4.74e-29	4.74e-29	1383	68	0.0491685		1.22e-09	1.22e-09	791	32	0.0404551
GO:BP	cognition	GO:0050890	353	27543		6.22e-29	6.22e-29	1665	90	0.0540541		5.29e-08	5.29e-08	440	27	0.0613636
GO:BP	cell adhesion	GO:0007155	1422	27543		9.39e-29	9.39e-29	1754	212	0.120867		0.0168781	0.0168781	878	76	0.0865604
GO:BP	neurotransmitter transport	GO:0006836	231	27543		9.83e-29	9.83e-29	1412	67	0.0474504		1.89e-12	1.89e-12	791	35	0.0442478
GO:BP	learning or memory	GO:0007611	319	27543		1.04e-28	1.04e-28	1665	85	0.0510511		8.29e-08	8.29e-08	735	33	0.044898
GO:BP	protein modification process	GO:0036211	3707	27543		2.27e-28	2.27e-28	1738	408	0.234753		1	1	868	144	0.165899
GO:BP	cellular protein modification process	GO:0006464	3707	27543		2.27e-28	2.27e-28	1738	408	0.234753		1	1	868	144	0.165899
GO:BP	cell surface receptor signaling pathway	GO:0007166	2812	27543		2.29e-28	2.29e-28	1756	337	0.191913		3.62111e-05	3.62111e-05	791	131	0.165613
GO:BP	head development	GO:0060322	813	27543		2.86e-28	2.86e-28	1756	148	0.0842825		6.97e-08	6.97e-08	834	62	0.0743405
GO:BP	regulation of catalytic activity	GO:0050790	2278	27543		4.19e-28	4.19e-28	1419	250	0.17618		0.113096	0.113096	828	101	0.121981
GO:BP	central nervous system development	GO:0007417	1031	27543		5.35e-28	5.35e-28	1756	171	0.0973804		1.92e-16	1.92e-16	796	88	0.110553
GO:BP	signal release from synapse	GO:0099643	176	27543		6.79e-28	6.79e-28	1412	58	0.0410765		2.76e-09	2.76e-09	791	27	0.034134
GO:BP	neurotransmitter secretion	GO:0007269	176	27543		6.79e-28	6.79e-28	1412	58	0.0410765		2.76e-09	2.76e-09	791	27	0.034134
GO:BP	regulation of anatomical structure morphogenesis	GO:0022603	961	27543		9.21e-28	9.21e-28	1736	162	0.093318		0.00961132	0.00961132	828	55	0.0664251
GO:BP	regulation of neurotransmitter levels	GO:0001505	239	27543		9.62e-28	9.62e-28	1412	67	0.0474504		3.32e-11	3.32e-11	791	34	0.0429836
GO:BP	protein phosphorylation	GO:0006468	1641	27543		2.26e-27	2.26e-27	1756	230	0.130979		0.100218	0.100218	357	41	0.114846
GO:BP	signal release	GO:0023061	563	27543		2.91e-27	2.91e-27	1433	105	0.0732729		1.68e-13	1.68e-13	801	58	0.0724095
GO:BP	tissue development	GO:0009888	2046	27543		7.17e-27	7.17e-27	1756	266	0.151481		0.0337561	0.0337561	828	95	0.114734
GO:BP	actin filament-based process	GO:0030029	803	27543		1.2e-26	1.2e-26	1697	141	0.0830878		0.000451297	0.000451297	850	53	0.0623529
GO:BP	brain development	GO:0007420	763	27543		2.08e-26	2.08e-26	1756	139	0.0791572		4.83e-09	4.83e-09	834	62	0.0743405
GO:BP	response to endogenous stimulus	GO:0009719	1775	27543		2.37e-26	2.37e-26	1756	240	0.136674		4.87635e-06	4.87635e-06	796	96	0.120603
GO:BP	positive regulation of transport	GO:0051050	1024	27543		3.87e-26	3.87e-26	1354	142	0.104874		1.46783e-05	1.46783e-05	813	65	0.0799508
GO:BP	dendrite development	GO:0016358	295	27543		5.23e-26	5.23e-26	1704	79	0.0463615		0.105347	0.105347	790	22	0.0278481
GO:BP	homeostatic process	GO:0042592	1732	27543		6.11e-26	6.11e-26	1756	235	0.133827		1	1	49	8	0.163265
GO:BP	cellular component organization	GO:0016043	7353	27543		6.48e-26	6.48e-26	1662	647	0.38929		0.00196042	0.00196042	723	251	0.347165
GO:BP	positive regulation of molecular function	GO:0044093	1533	27543		8.97e-26	8.97e-26	1720	213	0.123837		0.0524102	0.0524102	828	75	0.0905797
GO:BP	synaptic vesicle exocytosis	GO:0016079	130	27543		1.11e-25	1.11e-25	1383	48	0.0347072		4.58e-08	4.58e-08	791	22	0.0278129
GO:BP	cell junction assembly	GO:0034329	435	27543		1.11e-25	1.11e-25	1697	97	0.0571597		0.632343	0.632343	732	25	0.034153
GO:BP	potassium ion transport	GO:0006813	241	27543		1.88e-25	1.88e-25	1632	69	0.0422794		2.12e-15	2.12e-15	821	40	0.0487211
GO:BP	regulation of cell differentiation	GO:0045595	1718	27543		2.94e-25	2.94e-25	1756	232	0.132118		2.19e-07	2.19e-07	878	105	0.11959
GO:BP	regulation of phosphate metabolic process	GO:0019220	1432	27543		3.31e-25	3.31e-25	1756	205	0.116743		1	1	733	53	0.0723056
GO:BP	regulation of phosphorus metabolic process	GO:0051174	1433	27543		3.64e-25	3.64e-25	1756	205	0.116743		1	1	733	53	0.0723056
GO:BP	regulation of secretion by cell	GO:1903530	653	27543		5.44e-25	5.44e-25	1756	124	0.070615		1.21e-14	1.21e-14	801	65	0.0811486
GO:BP	synaptic vesicle cycle	GO:0099504	215	27543		5.64e-25	5.64e-25	1383	60	0.0433839		1.59324e-06	1.59324e-06	791	26	0.0328698
GO:BP	potassium ion transmembrane transport	GO:0071805	212	27543		6.72e-25	6.72e-25	1632	64	0.0392157		5.53e-15	5.53e-15	716	35	0.0488827
GO:BP	cellular response to endogenous stimulus	GO:0071495	1474	27543		8.78e-25	8.78e-25	1756	208	0.118451		0.00629785	0.00629785	796	74	0.0929648
GO:BP	regulation of secretion	GO:0051046	737	27543		9.88e-25	9.88e-25	1756	133	0.0757403		1.97e-15	1.97e-15	801	71	0.0886392
GO:BP	memory	GO:0007613	162	27543		1.86e-24	1.86e-24	1665	56	0.0336336		2.57692e-05	2.57692e-05	584	18	0.0308219
GO:BP	regulation of multicellular organismal development	GO:2000026	1494	27543		2.07e-24	2.07e-24	1756	209	0.119021		0.00011688	0.00011688	828	83	0.100242
GO:BP	regulation of cellular component movement	GO:0051270	1077	27543		2.17e-24	2.17e-24	1752	168	0.0958904		0.00159926	0.00159926	805	61	0.0757764
GO:BP	macromolecule modification	GO:0043412	3898	27543		2.66e-24	2.66e-24	1738	410	0.235903		1	1	868	146	0.168203
GO:BP	regulation of vesicle-mediated transport	GO:0060627	590	27543		3e-24	3e-24	1383	101	0.0730296		7.04444e-05	7.04444e-05	794	43	0.0541562
GO:BP	exocytosis	GO:0006887	390	27543		5.03e-24	5.03e-24	1383	80	0.0578453		1.02e-08	1.02e-08	794	40	0.0503778
GO:BP	positive regulation of cell communication	GO:0010647	1895	27543		1.14e-23	1.14e-23	1756	244	0.138952		8.41412e-05	8.41412e-05	801	97	0.121099
GO:BP	anatomical structure formation involved in morphogenesis	GO:0048646	1182	27543		1.34e-23	1.34e-23	1756	177	0.100797		0.587466	0.587466	858	59	0.0687646
GO:BP	positive regulation of multicellular organismal process	GO:0051240	1595	27543		2.03e-23	2.03e-23	1756	216	0.123007		4.80943e-05	4.80943e-05	811	87	0.107275
GO:BP	cellular component organization or biogenesis	GO:0071840	7543	27543		2.05e-23	2.05e-23	1662	650	0.391095		0.00647333	0.00647333	301	119	0.395349
GO:BP	cellular process	GO:0009987	21177	27543		2.29e-23	2.29e-23	1649	1435	0.870224		0.00202908	0.00202908	618	523	0.846278
GO:BP	regulation of cell migration	GO:0030334	932	27543		2.3e-23	2.3e-23	1752	151	0.0861872		0.0335217	0.0335217	805	51	0.063354
GO:BP	regulation of phosphorylation	GO:0042325	1284	27543		3.54e-23	3.54e-23	1756	186	0.105923		1	1	406	30	0.0738916
GO:BP	positive regulation of signaling	GO:0023056	1901	27543		4.26e-23	4.26e-23	1756	243	0.138383		9.78877e-05	9.78877e-05	801	97	0.121099
GO:BP	positive regulation of cell differentiation	GO:0045597	948	27543		6.01e-23	6.01e-23	1756	152	0.0865604		0.000121193	0.000121193	828	60	0.0724638
GO:BP	cellular response to chemical stimulus	GO:0070887	3457	27543		9.13e-23	9.13e-23	1756	373	0.212415		0.00213646	0.00213646	156	42	0.269231
GO:BP	chemical homeostasis	GO:0048878	1099	27543		1.6e-22	1.6e-22	1750	166	0.0948571		1	1	33	5	0.151515
GO:BP	regulation of locomotion	GO:0040012	1039	27543		1.83e-22	1.83e-22	1752	160	0.0913242		0.000455752	0.000455752	384	37	0.0963542
GO:BP	regulated exocytosis	GO:0045055	270	27543		2.06e-22	2.06e-22	1383	64	0.0462762		3.01e-08	3.01e-08	791	32	0.0404551
GO:BP	learning	GO:0007612	184	27543		3.8e-22	3.8e-22	1665	57	0.0342342		3.38e-09	3.38e-09	533	23	0.043152
GO:BP	regulation of cell development	GO:0060284	576	27543		5.12e-22	5.12e-22	1732	109	0.062933		6.4725e-05	6.4725e-05	811	43	0.053021
GO:BP	regulation of cell motility	GO:2000145	991	27543		6.25e-22	6.25e-22	1752	154	0.0878995		0.0187031	0.0187031	362	31	0.0856354
GO:BP	negative regulation of signal transduction	GO:0009968	1231	27543		7.7e-22	7.7e-22	1730	176	0.101734		0.130571	0.130571	796	60	0.0753769
GO:BP	establishment of localization in cell	GO:0051649	1998	27543		7.88e-22	7.88e-22	1423	214	0.150387		0.00339241	0.00339241	759	91	0.119895
GO:BP	regulation of postsynaptic membrane potential	GO:0060078	154	27543		1.67e-21	1.67e-21	1412	48	0.0339943		8.47e-12	8.47e-12	778	28	0.0359897
GO:BP	regulation of metal ion transport	GO:0010959	428	27543		1.83e-21	1.83e-21	1746	91	0.0521191		6.11e-10	6.11e-10	821	45	0.0548112
GO:BP	regulation of synaptic plasticity	GO:0048167	362	27543		2.11e-21	2.11e-21	1412	74	0.0524079		3.77842e-06	3.77842e-06	791	34	0.0429836
GO:BP	regulation of cation transmembrane transport	GO:1904062	385	27543		3.24e-21	3.24e-21	1737	85	0.0489349		5.98e-11	5.98e-11	821	44	0.0535932
GO:BP	regulation of synapse structure or activity	GO:0050803	258	27543		4.01e-21	4.01e-21	1688	67	0.0396919		7.26e-08	7.26e-08	807	31	0.0384139
GO:BP	cell surface receptor signaling pathway involved in cell-cell signaling	GO:1905114	555	27543		4.94e-21	4.94e-21	1736	105	0.0604839		4.02209e-05	4.02209e-05	828	43	0.0519324
GO:BP	negative regulation of response to stimulus	GO:0048585	1608	27543		1.08e-20	1.08e-20	1754	210	0.119726		0.00020092	0.00020092	805	85	0.10559
GO:BP	organonitrogen compound metabolic process	GO:1901564	6512	27543		1.12e-20	1.12e-20	1739	591	0.33985		1	1	873	232	0.26575
GO:BP	regulation of intracellular signal transduction	GO:1902531	1617	27543		2.18e-20	2.18e-20	1754	210	0.119726		0.0946164	0.0946164	813	76	0.0934809
GO:BP	regulation of ion transmembrane transporter activity	GO:0032412	267	27543		2.76e-20	2.76e-20	1632	66	0.0404412		8.59e-08	8.59e-08	388	22	0.056701
GO:BP	regulation of transmembrane transporter activity	GO:0022898	277	27543		4.73e-20	4.73e-20	1632	67	0.0410539		1.11e-07	1.11e-07	716	30	0.0418994
GO:BP	regulation of cation channel activity	GO:2001257	175	27543		6.49e-20	6.49e-20	1737	54	0.0310881		4.35e-07	4.35e-07	716	23	0.0321229
GO:BP	synapse assembly	GO:0007416	189	27543		6.58e-20	6.58e-20	1658	55	0.0331725		0.0178788	0.0178788	706	17	0.0240793
GO:BP	positive regulation of cellular component organization	GO:0051130	1149	27543		6.62e-20	6.62e-20	1720	163	0.0947674		0.000174657	0.000174657	791	66	0.0834387
GO:BP	synaptic transmission, glutamatergic	GO:0035249	107	27543		7.31e-20	7.31e-20	1416	39	0.0275424		2.81433e-05	2.81433e-05	801	17	0.0212235
GO:BP	macromolecule localization	GO:0033036	2970	27543		9.07e-20	9.07e-20	1737	321	0.184801		1	1	821	117	0.142509
GO:BP	protein localization to membrane	GO:0072657	614	27543		9.7e-20	9.7e-20	1416	97	0.0685028		0.00138609	0.00138609	821	42	0.0511571
GO:BP	regulation of synapse organization	GO:0050807	251	27543		1.3e-19	1.3e-19	1688	64	0.0379147		3.56e-08	3.56e-08	807	31	0.0384139
GO:BP	dendrite morphogenesis	GO:0048813	174	27543		1.35e-19	1.35e-19	1704	53	0.0311033		1	1	790	14	0.0177215
GO:BP	animal organ morphogenesis	GO:0009887	1082	27543		1.37e-19	1.37e-19	1756	158	0.0899772		5.03861e-06	5.03861e-06	749	65	0.0867824
GO:BP	actin cytoskeleton organization	GO:0030036	718	27543		2.44e-19	2.44e-19	1697	118	0.0695345		0.0306431	0.0306431	876	45	0.0513699
GO:BP	cellular response to organic substance	GO:0071310	2794	27543		4.5e-19	4.5e-19	1756	307	0.174829		0.0576761	0.0576761	181	37	0.20442
GO:BP	muscle system process	GO:0003012	422	27543		4.69e-19	4.69e-19	1450	78	0.0537931		1.25e-10	1.25e-10	796	45	0.0565327
GO:BP	muscle structure development	GO:0061061	689	27543		4.76e-19	4.76e-19	1736	116	0.0668203		1	1	865	38	0.0439306
GO:BP	regulation of transporter activity	GO:0032409	290	27543		7.36e-19	7.36e-19	1632	67	0.0410539		3.45e-07	3.45e-07	716	30	0.0418994
GO:BP	protein localization	GO:0008104	2493	27543		8.54e-19	8.54e-19	1737	279	0.160622		0.2678	0.2678	821	106	0.129111
GO:BP	regulation of neurotransmitter secretion	GO:0046928	120	27543		8.55e-19	8.55e-19	1412	40	0.0283286		8.73e-09	8.73e-09	791	22	0.0278129
GO:BP	positive regulation of ion transport	GO:0043270	312	27543		1.08e-18	1.08e-18	1746	72	0.0412371		5.68614e-06	5.68614e-06	574	26	0.0452962
GO:BP	localization within membrane	GO:0051668	678	27543		1.08e-18	1.08e-18	1416	101	0.0713277		0.0030831	0.0030831	821	44	0.0535932
GO:BP	vesicle-mediated transport	GO:0016192	1653	27543		1.3e-18	1.3e-18	1319	171	0.129644		0.0640644	0.0640644	760	74	0.0973684
GO:BP	regulation of nervous system development	GO:0051960	527	27543		1.33e-18	1.33e-18	1722	97	0.0563298		2.52e-10	2.52e-10	811	51	0.0628853
GO:BP	regulation of protein modification process	GO:0031399	1574	27543		1.96e-18	1.96e-18	1756	201	0.114465		1	1	828	60	0.0724638
GO:BP	calcium ion transport	GO:0006816	441	27543		2.16e-18	2.16e-18	1453	79	0.0543703		5.24018e-06	5.24018e-06	865	40	0.0462428
GO:BP	circulatory system development	GO:0072359	1180	27543		7.2e-18	7.2e-18	1752	163	0.0930365		1	1	865	58	0.067052
GO:BP	protein metabolic process	GO:0019538	5623	27543		7.41e-18	7.41e-18	1738	515	0.296318		1	1	870	195	0.224138
GO:BP	positive regulation of signal transduction	GO:0009967	1537	27543		7.96e-18	7.96e-18	1756	196	0.111617		0.194269	0.194269	579	55	0.0949914
GO:BP	regulation of protein phosphorylation	GO:0001932	1140	27543		1.1e-17	1.1e-17	1756	159	0.0905467		1	1	406	26	0.0640394
GO:BP	regulation of neurotransmitter transport	GO:0051588	135	27543		1.37e-17	1.37e-17	1412	41	0.0290368		9.89e-08	9.89e-08	791	22	0.0278129
GO:BP	enzyme-linked receptor protein signaling pathway	GO:0007167	956	27543		1.37e-17	1.37e-17	1756	141	0.0802961		0.476194	0.476194	872	51	0.0584862
GO:BP	positive regulation of catalytic activity	GO:0043085	1126	27543		1.5e-17	1.5e-17	1314	130	0.0989346		0.377849	0.377849	828	56	0.0676328
GO:BP	positive regulation of phosphate metabolic process	GO:0045937	939	27543		1.89e-17	1.89e-17	1756	139	0.0791572		1	1	446	25	0.0560538
GO:BP	positive regulation of phosphorus metabolic process	GO:0010562	939	27543		1.89e-17	1.89e-17	1756	139	0.0791572		1	1	446	25	0.0560538
GO:BP	regulation of anatomical structure size	GO:0090066	546	27543		5.32e-17	5.32e-17	1658	94	0.0566948		0.00600619	0.00600619	811	37	0.0456227
GO:BP	cytoskeleton organization	GO:0007010	1440	27543		9.1e-17	9.1e-17	1697	180	0.10607		0.0501892	0.0501892	850	73	0.0858824
GO:BP	regulation of neurogenesis	GO:0050767	433	27543		9.82e-17	9.82e-17	1722	83	0.0481998		1.88036e-05	1.88036e-05	811	37	0.0456227
GO:BP	response to organic substance	GO:0010033	3750	27543		1.24e-16	1.24e-16	1756	374	0.212984		0.00399381	0.00399381	801	156	0.194757
GO:BP	cellular chemical homeostasis	GO:0055082	704	27543		1.28e-16	1.28e-16	1746	113	0.0647194		1	1	865	33	0.0381503
GO:BP	cell population proliferation	GO:0008283	2109	27543		1.42e-16	1.42e-16	1756	242	0.137813		0.00712361	0.00712361	522	70	0.1341
GO:BP	response to organonitrogen compound	GO:0010243	1189	27543		2.1e-16	2.1e-16	1750	160	0.0914286		0.022376	0.022376	741	58	0.0782726
GO:BP	positive regulation of phosphorylation	GO:0042327	853	27543		2.27e-16	2.27e-16	1756	128	0.0728929		1	1	406	23	0.0566502
GO:BP	growth	GO:0040007	1063	27543		3.36e-16	3.36e-16	1756	148	0.0842825		0.116412	0.116412	12	5	0.416667
GO:BP	circulatory system process	GO:0003013	542	27543		3.53e-16	3.53e-16	1749	95	0.0543168		1.95e-07	1.95e-07	796	46	0.0577889
GO:BP	positive regulation of cell projection organization	GO:0031346	423	27543		4.02e-16	4.02e-16	1693	80	0.0472534		0.0080018	0.0080018	811	31	0.0382244
GO:BP	regulation of exocytosis	GO:0017157	238	27543		4.05e-16	4.05e-16	1383	52	0.0375994		5.8e-09	5.8e-09	794	31	0.0390428
GO:BP	positive regulation of metabolic process	GO:0009893	3908	27543		4.32e-16	4.32e-16	1756	384	0.218679		1	1	157	32	0.203822
GO:BP	cellular homeostasis	GO:0019725	794	27543		4.4e-16	4.4e-16	1746	121	0.0693013		1	1	865	34	0.0393064
GO:BP	organic substance transport	GO:0071702	2466	27543		5.18e-16	5.18e-16	1486	238	0.160162		0.203859	0.203859	759	99	0.130435
GO:BP	regulation of nervous system process	GO:0031644	186	27543		7.05e-16	7.05e-16	1693	50	0.0295334		6.58e-11	6.58e-11	584	26	0.0445205
GO:BP	protein localization to synapse	GO:0035418	84	27543		7.27e-16	7.27e-16	1050	28	0.0266667		0.0150742	0.0150742	551	10	0.0181488
GO:BP	glutamate receptor signaling pathway	GO:0007215	55	27543		8.13e-16	8.13e-16	1436	26	0.0181058		7e-13	7e-13	778	19	0.0244216
GO:BP	regulation of cellular component biogenesis	GO:0044087	988	27543		8.76e-16	8.76e-16	1722	138	0.0801394		0.00168897	0.00168897	683	51	0.0746706
GO:BP	calcium ion transmembrane transport	GO:0070588	338	27543		9.39e-16	9.39e-16	1453	64	0.0440468		0.000255444	0.000255444	865	31	0.0358381
GO:BP	axon guidance	GO:0007411	248	27543		9.78e-16	9.78e-16	1736	59	0.0339862		8.10624e-05	8.10624e-05	362	17	0.0469613
GO:BP	regulation of GTPase activity	GO:0043087	346	27543		1.12e-15	1.12e-15	1592	68	0.0427136		0.02903	0.02903	808	26	0.0321782
GO:BP	neuron projection guidance	GO:0097485	249	27543		1.2e-15	1.2e-15	1736	59	0.0339862		8.59746e-05	8.59746e-05	362	17	0.0469613
GO:BP	response to oxygen-containing compound	GO:1901700	2014	27543		1.22e-15	1.22e-15	1756	231	0.131549		0.000221678	0.000221678	801	100	0.124844
GO:BP	protein localization to cell junction	GO:1902414	116	27543		1.26e-15	1.26e-15	1050	32	0.0304762		0.251968	0.251968	551	10	0.0181488
GO:BP	response to nitrogen compound	GO:1901698	1299	27543		1.31e-15	1.31e-15	1750	168	0.096		0.0215753	0.0215753	741	62	0.0836707
GO:BP	tube development	GO:0035295	1157	27543		1.42e-15	1.42e-15	1752	155	0.0884703		0.339333	0.339333	446	36	0.0807175
GO:BP	regulation of kinase activity	GO:0043549	748	27543		1.65e-15	1.65e-15	1720	114	0.0662791		1	1	732	32	0.0437158
GO:BP	cell-cell adhesion	GO:0098609	887	27543		2.12e-15	2.12e-15	1754	129	0.0735462		1	1	849	45	0.0530035
GO:BP	ion homeostasis	GO:0050801	626	27543		3.04e-15	3.04e-15	1746	102	0.0584192		1	1	865	30	0.0346821
GO:BP	blood circulation	GO:0008015	514	27543		3.52e-15	3.52e-15	1749	90	0.051458		1.14e-07	1.14e-07	796	45	0.0565327
GO:BP	developmental growth	GO:0048589	765	27543		4.5e-15	4.5e-15	1750	116	0.0662857		0.0772445	0.0772445	828	44	0.0531401
GO:BP	regulation of primary metabolic process	GO:0080090	5971	27543		4.79e-15	4.79e-15	1756	532	0.302961		1	1	22	10	0.454545
GO:BP	actin filament organization	GO:0007015	450	27543		5.54e-15	5.54e-15	1694	81	0.0478158		0.0488546	0.0488546	876	32	0.0365297
GO:BP	protein localization to cell periphery	GO:1990778	353	27543		6.68e-15	6.68e-15	1485	65	0.043771		0.00660785	0.00660785	821	28	0.0341048
GO:BP	cellular protein metabolic process	GO:0044267	4958	27543		1.03e-14	1.03e-14	1738	453	0.260644		1	1	13	4	0.307692
GO:BP	nitrogen compound transport	GO:0071705	2026	27543		1.15e-14	1.15e-14	1737	227	0.130685		0.030161	0.030161	801	92	0.114856
GO:BP	regulation of cell death	GO:0010941	1796	27543		1.53e-14	1.53e-14	1756	209	0.119021		1	1	70	12	0.171429
GO:BP	response to hormone	GO:0009725	951	27543		1.84e-14	1.84e-14	1756	133	0.0757403		0.341889	0.341889	71	10	0.140845
GO:BP	regulation of cell population proliferation	GO:0042127	1764	27543		1.85e-14	1.85e-14	1756	206	0.117312		0.00456338	0.00456338	522	62	0.118774
GO:BP	cell death	GO:0008219	2208	27543		2.26e-14	2.26e-14	1756	243	0.138383		0.782371	0.782371	133	23	0.172932
GO:BP	regulation of cellular metabolic process	GO:0031323	6103	27543		2.55e-14	2.55e-14	1756	538	0.306378		1	1	22	10	0.454545
GO:BP	positive regulation of cellular metabolic process	GO:0031325	3386	27543		3.89e-14	3.89e-14	1756	336	0.191344		1	1	157	27	0.171975
GO:BP	cation homeostasis	GO:0055080	602	27543		4.72e-14	4.72e-14	1746	97	0.0555556		1	1	865	30	0.0346821
GO:BP	chemical synaptic transmission, postsynaptic	GO:0099565	121	27543		5.74e-14	5.74e-14	1412	35	0.0247875		0.000110165	0.000110165	773	17	0.0219922
GO:BP	inorganic ion homeostasis	GO:0098771	614	27543		6.15e-14	6.15e-14	1746	98	0.0561283		1	1	865	30	0.0346821
GO:BP	regulation of axonogenesis	GO:0050770	172	27543		6.18e-14	6.18e-14	1658	45	0.0271411		0.00184306	0.00184306	811	19	0.0234279
GO:BP	positive regulation of response to stimulus	GO:0048584	2264	27543		6.57e-14	6.57e-14	1756	246	0.140091		1	1	706	81	0.114731
GO:BP	muscle contraction	GO:0006936	310	27543		7.22e-14	7.22e-14	1450	58	0.04		2.98e-11	2.98e-11	796	39	0.048995
GO:BP	MAPK cascade	GO:0000165	792	27543		7.76e-14	7.76e-14	1754	116	0.0661346		0.0818257	0.0818257	727	41	0.0563961
GO:BP	regulation of synaptic transmission, glutamatergic	GO:0051966	76	27543		7.94e-14	7.94e-14	1416	28	0.019774		0.0261615	0.0261615	801	11	0.0137328
GO:BP	cellular protein localization	GO:0034613	1717	27543		7.96e-14	7.96e-14	1649	191	0.115828		0.508381	0.508381	821	77	0.0937881
GO:BP	dendritic spine development	GO:0060996	124	27543		1.04e-13	1.04e-13	1688	38	0.0225118		1	1	22	2	0.0909091
GO:BP	chemotaxis	GO:0006935	617	27543		1.08e-13	1.08e-13	1752	98	0.0559361		0.00123507	0.00123507	872	44	0.0504587
GO:BP	positive regulation of nitrogen compound metabolic process	GO:0051173	3177	27543		1.08e-13	1.08e-13	1756	318	0.181093		1	1	157	27	0.171975
GO:BP	apoptotic process	GO:0006915	1973	27543		1.23e-13	1.23e-13	1756	221	0.125854		0.416518	0.416518	133	22	0.165414
GO:BP	neuromuscular process	GO:0050905	180	27543		1.24e-13	1.24e-13	1606	45	0.0280199		0.000127734	0.000127734	791	21	0.0265487
GO:BP	cellular macromolecule localization	GO:0070727	1725	27543		1.29e-13	1.29e-13	1649	191	0.115828		0.58477	0.58477	821	77	0.0937881
GO:BP	taxis	GO:0042330	619	27543		1.34e-13	1.34e-13	1752	98	0.0559361		0.00134792	0.00134792	872	44	0.0504587
GO:BP	regulation of metabolic process	GO:0019222	7320	27543		1.79e-13	1.79e-13	1738	614	0.35328		1	1	22	10	0.454545
GO:BP	regulation of postsynapse organization	GO:0099175	109	27543		2e-13	2e-13	1549	34	0.0219496		0.785079	0.785079	807	11	0.0136307
GO:BP	regulation of programmed cell death	GO:0043067	1629	27543		2.29e-13	2.29e-13	1756	191	0.10877		1	1	70	11	0.157143
GO:BP	positive regulation of cell development	GO:0010720	361	27543		2.36e-13	2.36e-13	1732	69	0.0398383		0.00805254	0.00805254	811	28	0.0345253
GO:BP	negative regulation of multicellular organismal process	GO:0051241	1078	27543		2.47e-13	2.47e-13	1756	142	0.0808656		0.00199363	0.00199363	828	62	0.0748792
GO:BP	regulation of protein localization	GO:0032880	925	27543		2.5e-13	2.5e-13	1155	97	0.0839827		1	1	809	41	0.0506799
GO:BP	regulation of apoptotic process	GO:0042981	1597	27543		2.74e-13	2.74e-13	1756	188	0.107062		1	1	70	11	0.157143
GO:BP	adult behavior	GO:0030534	171	27543		3.03e-13	3.03e-13	1741	45	0.0258472		0.00116034	0.00116034	791	19	0.0240202
GO:BP	transmembrane receptor protein tyrosine kinase signaling pathway	GO:0007169	598	27543		3.04e-13	3.04e-13	1750	95	0.0542857		0.206069	0.206069	12	4	0.333333
GO:BP	positive regulation of GTPase activity	GO:0043547	250	27543		3.2e-13	3.2e-13	1592	53	0.0332915		0.00328077	0.00328077	808	23	0.0284653
GO:BP	regulation of transferase activity	GO:0051338	868	27543		3.98e-13	3.98e-13	1697	119	0.0701237		1	1	852	40	0.0469484
GO:BP	positive regulation of synaptic transmission	GO:0050806	329	27543		4.23e-13	4.23e-13	1416	58	0.0409605		0.00329176	0.00329176	801	27	0.0337079
GO:BP	programmed cell death	GO:0012501	2031	27543		4.24e-13	4.24e-13	1756	224	0.127563		0.624898	0.624898	133	22	0.165414
GO:BP	cellular response to oxygen-containing compound	GO:1901701	1466	27543		4.45e-13	4.45e-13	1756	176	0.100228		0.0385396	0.0385396	293	34	0.116041
GO:BP	small GTPase mediated signal transduction	GO:0007264	433	27543		4.95e-13	4.95e-13	1751	77	0.0439749		0.744592	0.744592	831	27	0.032491
GO:BP	regulation of protein metabolic process	GO:0051246	2631	27543		5.04e-13	5.04e-13	1314	218	0.165906		1	1	13	5	0.384615
GO:BP	forebrain development	GO:0030900	423	27543		5.05e-13	5.05e-13	1756	76	0.0432802		4.48e-07	4.48e-07	689	36	0.0522496
GO:BP	cellular macromolecule metabolic process	GO:0044260	5820	27543		5.05e-13	5.05e-13	1738	507	0.291715		1	1	13	5	0.384615
GO:BP	system process	GO:0003008	3325	27543		5.92e-13	5.92e-13	1639	309	0.18853		5.98272e-06	5.98272e-06	809	155	0.191595
GO:BP	postsynaptic specialization organization	GO:0099084	54	27543		5.96e-13	5.96e-13	1544	24	0.015544		1	1	736	3	0.00407609
GO:BP	regulation of nitrogen compound metabolic process	GO:0051171	5797	27543		6.01e-13	6.01e-13	1738	505	0.290564		1	1	22	10	0.454545
GO:BP	muscle tissue development	GO:0060537	464	27543		6.98e-13	6.98e-13	1747	80	0.0457928		1	1	745	23	0.0308725
GO:BP	tube morphogenesis	GO:0035239	909	27543		1.49e-12	1.49e-12	1752	124	0.0707763		0.279741	0.279741	828	48	0.057971
GO:BP	cellular ion homeostasis	GO:0006873	509	27543		1.72e-12	1.72e-12	1746	84	0.04811		1	1	865	23	0.0265896
GO:BP	regulation of protein localization to membrane	GO:1905475	198	27543		1.73e-12	1.73e-12	1485	44	0.0296296		0.138578	0.138578	872	18	0.0206422
GO:BP	regulation of postsynaptic membrane neurotransmitter receptor levels	GO:0099072	89	27543		1.94e-12	1.94e-12	1107	26	0.0234869		0.00440953	0.00440953	350	9	0.0257143
GO:BP	response to external stimulus	GO:0009605	3104	27543		1.94e-12	1.94e-12	1754	307	0.175029		0.0527329	0.0527329	535	92	0.171963
GO:BP	negative regulation of synaptic transmission	GO:0050805	83	27543		2.35e-12	2.35e-12	1725	30	0.0173913		0.0216562	0.0216562	247	7	0.0283401
GO:BP	negative regulation of cellular component organization	GO:0051129	708	27543		2.35e-12	2.35e-12	1722	103	0.0598142		1	1	402	15	0.0373134
GO:BP	cellular cation homeostasis	GO:0030003	494	27543		2.72e-12	2.72e-12	1746	82	0.0469645		1	1	865	23	0.0265896
GO:BP	metal ion homeostasis	GO:0055065	525	27543		3.64e-12	3.64e-12	1746	85	0.0486827		1	1	865	26	0.0300578
GO:BP	neuron migration	GO:0001764	182	27543		4.57e-12	4.57e-12	1450	41	0.0282759		1	1	791	11	0.0139064
GO:BP	positive regulation of macromolecule metabolic process	GO:0010604	3592	27543		4.89e-12	4.89e-12	1756	343	0.19533		1	1	157	30	0.191083
GO:BP	positive regulation of nervous system development	GO:0051962	340	27543		5.07e-12	5.07e-12	1722	64	0.0371661		3.55e-07	3.55e-07	811	35	0.0431566
GO:BP	muscle cell differentiation	GO:0042692	409	27543		5.28e-12	5.28e-12	1736	72	0.0414747		1	1	850	23	0.0270588
GO:BP	regulation of regulated secretory pathway	GO:1903305	174	27543		5.73e-12	5.73e-12	1383	39	0.0281996		2.09e-09	2.09e-09	791	27	0.034134
GO:BP	telencephalon development	GO:0021537	285	27543		6.82e-12	6.82e-12	1756	58	0.0330296		0.00148046	0.00148046	834	26	0.0311751
GO:BP	response to abiotic stimulus	GO:0009628	1280	27543		7.1e-12	7.1e-12	1755	156	0.0888889		0.00253382	0.00253382	845	71	0.0840237
GO:BP	positive regulation of protein phosphorylation	GO:0001934	779	27543		7.7e-12	7.7e-12	1756	110	0.0626424		1	1	406	20	0.0492611
GO:BP	response to growth factor	GO:0070848	721	27543		8.01e-12	8.01e-12	1722	103	0.0598142		1	1	447	22	0.049217
GO:BP	regulation of muscle system process	GO:0090257	247	27543		8.33e-12	8.33e-12	1448	48	0.0331492		3.10758e-05	3.10758e-05	736	25	0.0339674
GO:BP	supramolecular fiber organization	GO:0097435	755	27543		8.91e-12	8.91e-12	1694	105	0.0619835		0.0235987	0.0235987	876	47	0.053653
GO:BP	neuron projection organization	GO:0106027	102	27543		9.34e-12	9.34e-12	830	24	0.0289157		1	1	809	8	0.00988875
GO:BP	associative learning	GO:0008306	117	27543		9.9e-12	9.9e-12	1737	35	0.0201497		2.20081e-06	2.20081e-06	791	19	0.0240202
GO:BP	regulation of protein kinase activity	GO:0045859	642	27543		1.02e-11	1.02e-11	1720	95	0.0552326		1	1	852	31	0.036385
GO:BP	positive regulation of hydrolase activity	GO:0051345	547	27543		1.21e-11	1.21e-11	1042	63	0.0604607		0.570117	0.570117	858	33	0.0384615
GO:BP	positive regulation of protein modification process	GO:0031401	1043	27543		1.39e-11	1.39e-11	1756	134	0.0763098		1	1	406	22	0.0541872
GO:BP	heart development	GO:0007507	626	27543		1.47e-11	1.47e-11	1747	94	0.0538065		1	1	865	31	0.0358381
GO:BP	cellular response to hormone stimulus	GO:0032870	633	27543		1.49e-11	1.49e-11	1756	95	0.0541002		1	1	174	9	0.0517241
GO:BP	regulation of cell adhesion	GO:0030155	757	27543		1.62e-11	1.62e-11	1754	107	0.0610034		1	1	806	32	0.0397022
GO:BP	dendritic spine organization	GO:0097061	95	27543		1.81e-11	1.81e-11	830	23	0.0277108		1	1	790	7	0.00886076
GO:BP	excitatory postsynaptic potential	GO:0060079	113	27543		1.97e-11	1.97e-11	1412	31	0.0219547		0.000243006	0.000243006	773	16	0.0206986
GO:BP	positive regulation of kinase activity	GO:0033674	482	27543		2.26e-11	2.26e-11	1752	79	0.0450913		1	1	357	13	0.0364146
GO:BP	negative regulation of developmental process	GO:0051093	1033	27543		2.52e-11	2.52e-11	1730	131	0.0757225		1	1	12	4	0.333333
GO:BP	canonical Wnt signaling pathway	GO:0060070	297	27543		2.81e-11	2.81e-11	1736	58	0.0334101		1	1	878	21	0.023918
GO:BP	cellular response to growth factor stimulus	GO:0071363	693	27543		2.82e-11	2.82e-11	1722	99	0.0574913		1	1	828	31	0.0374396
GO:BP	negative regulation of nitrogen compound metabolic process	GO:0051172	2539	27543		3.61e-11	3.61e-11	1722	254	0.147503		1	1	15	5	0.333333
GO:BP	locomotory behavior	GO:0007626	247	27543		3.82e-11	3.82e-11	1749	52	0.0297313		0.000226865	0.000226865	816	25	0.0306373
GO:BP	divalent inorganic cation homeostasis	GO:0072507	359	27543		4.09e-11	4.09e-11	1746	65	0.037228		1	1	865	22	0.0254335
GO:BP	response to stress	GO:0006950	3942	27543		4.1e-11	4.1e-11	1755	365	0.207977		0.741283	0.741283	77	23	0.298701
GO:BP	positive regulation of intracellular signal transduction	GO:1902533	984	27543		4.9e-11	4.9e-11	1754	127	0.0724059		1	1	522	33	0.0632184
GO:BP	modulation of excitatory postsynaptic potential	GO:0098815	57	27543		5.12e-11	5.12e-11	798	18	0.0225564		0.282882	0.282882	736	8	0.0108696
GO:BP	negative regulation of cellular metabolic process	GO:0031324	2670	27543		6.93e-11	6.93e-11	1722	263	0.152729		1	1	15	5	0.333333
GO:BP	regulation of signaling receptor activity	GO:0010469	169	27543		7.2e-11	7.2e-11	1544	39	0.0252591		1.67e-08	1.67e-08	306	17	0.0555556
GO:BP	cell growth	GO:0016049	533	27543		1.02e-10	1.02e-10	1756	83	0.0472665		0.0159362	0.0159362	38	7	0.184211
GO:BP	regulation of actin filament-based process	GO:0032970	412	27543		1.08e-10	1.08e-10	1746	70	0.0400916		0.609654	0.609654	552	20	0.0362319
GO:BP	postsynaptic density organization	GO:0097106	49	27543		1.1e-10	1.1e-10	1544	21	0.013601		1	1	736	3	0.00407609
GO:BP	positive regulation of neurogenesis	GO:0050769	283	27543		1.21e-10	1.21e-10	1722	55	0.0319396		0.00871094	0.00871094	811	24	0.0295931
GO:BP	regulation of cellular protein metabolic process	GO:0032268	2456	27543		1.33e-10	1.33e-10	1737	247	0.142199		1	1	13	4	0.307692
GO:BP	cellular metal ion homeostasis	GO:0006875	424	27543		1.49e-10	1.49e-10	1746	71	0.0406644		1	1	865	21	0.0242775
GO:BP	positive regulation of excitatory postsynaptic potential	GO:2000463	38	27543		1.73e-10	1.73e-10	798	15	0.018797		1	1	736	6	0.00815217
GO:BP	response to organic cyclic compound	GO:0014070	1123	27543		1.79e-10	1.79e-10	1756	138	0.0785877		0.00142995	0.00142995	683	56	0.0819912
GO:BP	regulation of small GTPase mediated signal transduction	GO:0051056	236	27543		1.93e-10	1.93e-10	1590	47	0.0295597		1	1	79	5	0.0632911
GO:BP	developmental maturation	GO:0021700	327	27543		2.03e-10	2.03e-10	1741	60	0.034463		1	1	156	7	0.0448718
GO:BP	negative regulation of transport	GO:0051051	484	27543		2.08e-10	2.08e-10	1746	77	0.0441008		1.39e-08	1.39e-08	794	45	0.0566751
GO:BP	regulation of synaptic vesicle exocytosis	GO:2000300	81	27543		2.59e-10	2.59e-10	1383	25	0.0180766		0.000154623	0.000154623	791	14	0.0176991
GO:BP	positive regulation of cation transmembrane transport	GO:1904064	180	27543		2.62e-10	2.62e-10	1736	42	0.0241935		0.013275	0.013275	574	15	0.0261324
GO:BP	regulation of dendrite development	GO:0050773	128	27543		2.84e-10	2.84e-10	1264	30	0.0237342		0.00911714	0.00911714	790	15	0.0189873
GO:BP	regulation of cell junction assembly	GO:1901888	213	27543		3.09e-10	3.09e-10	1658	45	0.0271411		0.0232306	0.0232306	706	18	0.0254958
GO:BP	cell-substrate adhesion	GO:0031589	365	27543		3.55e-10	3.55e-10	1752	64	0.0365297		1	1	840	20	0.0238095
GO:BP	regulation of cellular localization	GO:0060341	799	27543		3.83e-10	3.83e-10	1145	81	0.0707424		0.948036	0.948036	809	41	0.0506799
GO:BP	rhythmic process	GO:0048511	348	27543		4.18e-10	4.18e-10	1658	60	0.0361882		0.0109351	0.0109351	621	23	0.037037
GO:BP	positive regulation of transmembrane transport	GO:0034764	255	27543		4.3e-10	4.3e-10	1736	51	0.0293779		0.138448	0.138448	382	13	0.0340314
GO:BP	negative regulation of cell differentiation	GO:0045596	788	27543		4.3e-10	4.3e-10	1722	105	0.0609756		1	1	12	3	0.25
GO:BP	receptor localization to synapse	GO:0097120	72	27543		4.45e-10	4.45e-10	1050	21	0.02		0.000149837	0.000149837	291	9	0.0309278
GO:BP	calcium ion homeostasis	GO:0055074	323	27543		4.53e-10	4.53e-10	1746	59	0.0337915		1	1	865	22	0.0254335
GO:BP	developmental growth involved in morphogenesis	GO:0060560	264	27543		4.69e-10	4.69e-10	1736	52	0.0299539		0.0393075	0.0393075	828	22	0.02657
GO:BP	cellular calcium ion homeostasis	GO:0006874	297	27543		4.78e-10	4.78e-10	1746	56	0.0320733		1	1	865	20	0.0231214
GO:BP	cellular divalent inorganic cation homeostasis	GO:0072503	324	27543		5.21e-10	5.21e-10	1746	59	0.0337915		1	1	865	20	0.0231214
GO:BP	actin filament-based movement	GO:0030048	125	27543		6.21e-10	6.21e-10	1746	34	0.0194731		0.397525	0.397525	760	12	0.0157895
GO:BP	regulation of neurotransmitter receptor activity	GO:0099601	70	27543		6.24e-10	6.24e-10	1544	24	0.015544		7.79e-11	7.79e-11	306	14	0.0457516
GO:BP	positive regulation of ion transmembrane transport	GO:0034767	200	27543		6.24e-10	6.24e-10	1736	44	0.0253456		0.046869	0.046869	574	15	0.0261324
GO:BP	action potential	GO:0001508	146	27543		7.28e-10	7.28e-10	1390	33	0.023741		3.08e-07	3.08e-07	491	18	0.0366599
GO:BP	regulation of cell morphogenesis	GO:0022604	329	27543		7.69e-10	7.69e-10	1537	55	0.035784		0.0593539	0.0593539	100	8	0.08
GO:BP	exocytic process	GO:0140029	81	27543		7.98e-10	7.98e-10	1319	24	0.0181956		0.695017	0.695017	739	9	0.0121786
GO:BP	second-messenger-mediated signaling	GO:0019932	311	27543		8.15e-10	8.15e-10	1737	57	0.0328152		0.0120082	0.0120082	856	26	0.0303738
GO:BP	cellular response to organic cyclic compound	GO:0071407	698	27543		9.42e-10	9.42e-10	1756	97	0.0552392		0.00930615	0.00930615	352	25	0.0710227
GO:BP	protein localization to postsynaptic membrane	GO:1903539	54	27543		1.12e-09	1.12e-09	1544	21	0.013601		0.00272839	0.00272839	281	7	0.024911
GO:BP	regulation of MAPK cascade	GO:0043408	712	27543		1.19e-09	1.19e-09	1754	98	0.0558723		0.138091	0.138091	430	26	0.0604651
GO:BP	regulation of growth	GO:0040008	701	27543		1.22e-09	1.22e-09	1756	97	0.0552392		0.0118231	0.0118231	19	6	0.315789
GO:BP	positive regulation of secretion	GO:0051047	399	27543		1.24e-09	1.24e-09	1155	52	0.0450216		5.98036e-05	5.98036e-05	801	34	0.0424469
GO:BP	regulation of calcium ion transport	GO:0051924	278	27543		1.35e-09	1.35e-09	1746	53	0.0303551		0.00599162	0.00599162	865	25	0.0289017
GO:BP	developmental cell growth	GO:0048588	265	27543		1.36e-09	1.36e-09	1658	50	0.0301568		0.0623267	0.0623267	91	7	0.0769231
GO:BP	regulation of neuronal synaptic plasticity	GO:0048168	67	27543		1.4e-09	1.4e-09	1688	24	0.014218		3.32806e-05	3.32806e-05	584	12	0.0205479
GO:BP	positive regulation of transferase activity	GO:0051347	570	27543		1.4e-09	1.4e-09	1752	84	0.0479452		1	1	357	13	0.0364146
GO:BP	positive regulation of ion transmembrane transporter activity	GO:0032414	122	27543		1.41e-09	1.41e-09	1736	33	0.0190092		1	1	350	6	0.0171429
GO:BP	regulation of cellular component size	GO:0032535	387	27543		1.5e-09	1.5e-09	1658	63	0.0379976		1	1	850	21	0.0247059
GO:BP	positive regulation of protein localization	GO:1903829	481	27543		1.58e-09	1.58e-09	1155	58	0.0502165		1	1	233	8	0.0343348
GO:BP	blood vessel development	GO:0001568	738	27543		1.67e-09	1.67e-09	1752	100	0.0570776		1	1	828	35	0.0422705
GO:BP	protein localization to postsynapse	GO:0062237	55	27543		1.71e-09	1.71e-09	1544	21	0.013601		0.0030992	0.0030992	281	7	0.024911
GO:BP	sodium ion transmembrane transport	GO:0035725	162	27543		2.2e-09	2.2e-09	1626	37	0.0227552		0.000226284	0.000226284	529	16	0.0302457
GO:BP	ossification	GO:0001503	409	27543		2.2e-09	2.2e-09	1746	67	0.0383734		0.447059	0.447059	199	11	0.0552764
GO:BP	negative regulation of molecular function	GO:0044092	1136	27543		2.22e-09	2.22e-09	1512	122	0.0806878		1	1	828	50	0.0603865
GO:BP	lipid biosynthetic process	GO:0008610	682	27543		2.36e-09	2.36e-09	1445	83	0.0574394		1	1	550	19	0.0345455
GO:BP	response to chemical	GO:0042221	5880	27543		2.52e-09	2.52e-09	1588	455	0.286524		0.00412132	0.00412132	156	59	0.378205
GO:BP	regulation of hydrolase activity	GO:0051336	1026	27543		2.76e-09	2.76e-09	1720	124	0.072093		1	1	75	8	0.106667
GO:BP	regulation of organelle organization	GO:0033043	1142	27543		2.82e-09	2.82e-09	1579	126	0.0797973		1	1	18	3	0.166667
GO:BP	epithelium development	GO:0060429	1260	27543		3.34e-09	3.34e-09	1756	146	0.0831435		0.33467	0.33467	457	39	0.0853392
GO:BP	Wnt signaling pathway	GO:0016055	436	27543		4.08e-09	4.08e-09	1736	69	0.0397465		1	1	828	26	0.031401
GO:BP	negative regulation of phosphorus metabolic process	GO:0010563	444	27543		4.57e-09	4.57e-09	1324	59	0.0445619		1	1	828	21	0.0253623
GO:BP	negative regulation of phosphate metabolic process	GO:0045936	444	27543		4.57e-09	4.57e-09	1324	59	0.0445619		1	1	828	21	0.0253623
GO:BP	cell-cell signaling by wnt	GO:0198738	438	27543		5.08e-09	5.08e-09	1736	69	0.0397465		1	1	828	26	0.031401
GO:BP	regulation of blood circulation	GO:1903522	262	27543		5.86e-09	5.86e-09	1448	45	0.0310773		6.96898e-06	6.96898e-06	796	28	0.0351759
GO:BP	dendritic spine morphogenesis	GO:0060997	71	27543		6.75e-09	6.75e-09	830	18	0.0216867		1	1	790	7	0.00886076
GO:BP	peptidyl-amino acid modification	GO:0018193	1298	27543		7.78e-09	7.78e-09	1332	121	0.0908408		1	1	557	41	0.0736086
GO:BP	regulation of canonical Wnt signaling pathway	GO:0060828	242	27543		8.27e-09	8.27e-09	1655	46	0.0277946		1	1	878	17	0.0193622
GO:BP	protein localization to plasma membrane	GO:0072659	289	27543		9.48e-09	9.48e-09	1485	48	0.0323232		0.136405	0.136405	821	22	0.0267966
GO:BP	regulation of neuron death	GO:1901214	373	27543		9.54e-09	9.54e-09	1752	62	0.0353881		0.000450266	0.000450266	677	28	0.0413589
GO:BP	positive regulation of transporter activity	GO:0032411	130	27543		9.68e-09	9.68e-09	1736	33	0.0190092		1	1	350	6	0.0171429
GO:BP	regulation of amine transport	GO:0051952	109	27543		9.95e-09	9.95e-09	1737	30	0.0172712		1.23e-12	1.23e-12	791	25	0.0316056
GO:BP	blood vessel morphogenesis	GO:0048514	643	27543		1e-08	1e-08	1752	89	0.0507991		1	1	858	34	0.039627
GO:BP	positive regulation of cell population proliferation	GO:0008284	1048	27543		1.03e-08	1.03e-08	1755	126	0.0717949		0.0654068	0.0654068	186	20	0.107527
GO:BP	tissue morphogenesis	GO:0048729	653	27543		1.08e-08	1.08e-08	1756	90	0.0512528		0.073242	0.073242	730	36	0.0493151
GO:BP	positive regulation of cell death	GO:0010942	664	27543		1.13e-08	1.13e-08	1756	91	0.0518223		1	1	70	5	0.0714286
GO:BP	positive regulation of protein metabolic process	GO:0051247	1519	27543		1.16e-08	1.16e-08	1756	166	0.094533		1	1	32	4	0.125
GO:BP	cellular component maintenance	GO:0043954	82	27543		1.23e-08	1.23e-08	1340	23	0.0171642		1	1	849	6	0.00706714
GO:BP	regulation of macromolecule metabolic process	GO:0060255	6825	27543		1.28e-08	1.28e-08	1738	553	0.318182		1	1	15	7	0.466667
GO:BP	positive regulation of secretion by cell	GO:1903532	346	27543		1.39e-08	1.39e-08	1155	46	0.0398268		2.2205e-05	2.2205e-05	801	32	0.0399501
GO:BP	regulation of long-term synaptic potentiation	GO:1900271	54	27543		1.45e-08	1.45e-08	1188	18	0.0151515		1	1	791	7	0.00884956
GO:BP	monoamine transport	GO:0015844	97	27543		1.46e-08	1.46e-08	1737	28	0.0161197		8.96e-10	8.96e-10	791	21	0.0265487
GO:BP	organelle organization	GO:0006996	3787	27543		1.5e-08	1.5e-08	1086	230	0.211786		1	1	103	18	0.174757
GO:BP	positive regulation of neuron projection development	GO:0010976	215	27543		1.51e-08	1.51e-08	1693	43	0.0253987		0.000628219	0.000628219	790	22	0.0278481
GO:BP	peptidyl-serine phosphorylation	GO:0018105	330	27543		1.56e-08	1.56e-08	1311	48	0.0366133		1	1	134	5	0.0373134
GO:BP	actin filament bundle assembly	GO:0051017	166	27543		1.61e-08	1.61e-08	1694	37	0.0218418		0.255903	0.255903	79	5	0.0632911
GO:BP	angiogenesis	GO:0001525	545	27543		1.63e-08	1.63e-08	1752	79	0.0450913		1	1	858	30	0.034965
GO:BP	protein-containing complex localization	GO:0031503	193	27543		1.65e-08	1.65e-08	1225	34	0.0277551		0.0554405	0.0554405	755	17	0.0225166
GO:BP	calcium-ion regulated exocytosis	GO:0017156	68	27543		1.82e-08	1.82e-08	1208	20	0.0165563		0.00523067	0.00523067	760	11	0.0144737
GO:BP	cellular response to nitrogen compound	GO:1901699	824	27543		1.89e-08	1.89e-08	1750	105	0.06		0.098964	0.098964	681	40	0.0587372
GO:BP	neuron death	GO:0070997	418	27543		2.08e-08	2.08e-08	1752	66	0.0376712		0.00141001	0.00141001	677	29	0.042836
GO:BP	catecholamine secretion	GO:0050432	67	27543		2.14e-08	2.14e-08	1737	23	0.0132412		7.95e-10	7.95e-10	791	18	0.022756
GO:BP	vasculature development	GO:0001944	771	27543		2.31e-08	2.31e-08	1752	100	0.0570776		1	1	828	36	0.0434783
GO:BP	dephosphorylation	GO:0016311	408	27543		2.37e-08	2.37e-08	1673	63	0.0376569		1	1	791	16	0.0202276
GO:BP	regulation of developmental growth	GO:0048638	372	27543		2.45e-08	2.45e-08	1750	61	0.0348571		0.110669	0.110669	813	26	0.0319803
GO:BP	actin filament bundle organization	GO:0061572	169	27543		2.84e-08	2.84e-08	1694	37	0.0218418		0.278316	0.278316	79	5	0.0632911
GO:BP	fat cell differentiation	GO:0045444	253	27543		2.92e-08	2.92e-08	1701	47	0.0276308		1	1	145	5	0.0344828
GO:BP	response to wounding	GO:0009611	553	27543		3.62e-08	3.62e-08	1754	79	0.0450399		1	1	847	24	0.0283353
GO:BP	regulation of fat cell differentiation	GO:0045598	143	27543		3.79e-08	3.79e-08	1180	28	0.0237288		0.435263	0.435263	878	14	0.0159453
GO:BP	positive regulation of cation channel activity	GO:2001259	81	27543		3.85e-08	3.85e-08	1736	25	0.0144009		1	1	350	6	0.0171429
GO:BP	regulation of muscle contraction	GO:0006937	161	27543		3.88e-08	3.88e-08	1448	33	0.0227901		0.000743423	0.000743423	736	18	0.0244565
GO:BP	positive regulation of MAPK cascade	GO:0043410	513	27543		3.92e-08	3.92e-08	1754	75	0.0427594		0.0486476	0.0486476	430	22	0.0511628
GO:BP	cellular response to organonitrogen compound	GO:0071417	757	27543		3.93e-08	3.93e-08	1750	98	0.056		0.499393	0.499393	274	19	0.0693431
GO:BP	negative regulation of cell development	GO:0010721	201	27543		4.12e-08	4.12e-08	1722	41	0.0238095		0.0303805	0.0303805	358	12	0.0335196
GO:BP	long-term memory	GO:0007616	44	27543		4.81e-08	4.81e-08	1188	16	0.013468		1	1	71	2	0.028169
GO:BP	calcium ion transmembrane import into cytosol	GO:0097553	180	27543		5.02e-08	5.02e-08	1453	35	0.0240881		1	1	865	15	0.017341
GO:BP	negative regulation of protein modification process	GO:0031400	526	27543		5.1e-08	5.1e-08	1311	63	0.0480549		1	1	828	27	0.0326087
GO:BP	cardiac muscle tissue development	GO:0048738	251	27543		5.46e-08	5.46e-08	1747	47	0.0269033		0.865452	0.865452	865	19	0.0219653
GO:BP	striated muscle contraction	GO:0006941	172	27543		5.51e-08	5.51e-08	1448	34	0.0234807		0.0527528	0.0527528	760	16	0.0210526
GO:BP	striated muscle tissue development	GO:0014706	269	27543		5.76e-08	5.76e-08	1747	49	0.0280481		0.777884	0.777884	865	20	0.0231214
GO:BP	regulation of catecholamine secretion	GO:0050433	64	27543		5.9e-08	5.9e-08	1737	22	0.0126655		3.31e-10	3.31e-10	791	18	0.022756
GO:BP	regulation of cytoskeleton organization	GO:0051493	545	27543		6.04e-08	6.04e-08	1697	76	0.0447849		0.855946	0.855946	112	9	0.0803571
GO:BP	positive regulation of cell migration	GO:0030335	560	27543		6.44e-08	6.44e-08	1752	79	0.0450913		0.597918	0.597918	805	32	0.0397516
GO:BP	amine transport	GO:0015837	117	27543		7.09e-08	7.09e-08	1737	30	0.0172712		7.32e-13	7.32e-13	791	26	0.0328698
GO:BP	sodium ion transport	GO:0006814	245	27543		7.47e-08	7.47e-08	1485	42	0.0282828		0.0064529	0.0064529	796	22	0.0276382
GO:BP	positive regulation of fat cell differentiation	GO:0045600	67	27543		7.51e-08	7.51e-08	1025	18	0.017561		1	1	878	8	0.00911162
GO:BP	protein dephosphorylation	GO:0006470	273	27543		7.51e-08	7.51e-08	1673	48	0.028691		1	1	791	10	0.0126422
GO:BP	regulation of cell growth	GO:0001558	449	27543		7.59e-08	7.59e-08	1756	68	0.0387244		0.0235681	0.0235681	19	5	0.263158
GO:BP	positive regulation of protein localization to membrane	GO:1905477	111	27543		7.61e-08	7.61e-08	1485	27	0.0181818		1	1	233	5	0.0214592
GO:BP	heart process	GO:0003015	245	27543		8.1e-08	8.1e-08	1747	46	0.0263309		0.0221128	0.0221128	796	21	0.0263819
GO:BP	regulation of dendrite morphogenesis	GO:0048814	86	27543		8.54e-08	8.54e-08	1264	22	0.0174051		1	1	790	8	0.0101266
GO:BP	positive regulation of cellular component biogenesis	GO:0044089	521	27543		8.63e-08	8.63e-08	1720	74	0.0430233		0.000327316	0.000327316	91	12	0.131868
GO:BP	positive regulation of protein kinase activity	GO:0045860	412	27543		8.82e-08	8.82e-08	1752	64	0.0365297		1	1	399	11	0.0275689
GO:BP	positive regulation of programmed cell death	GO:0043068	594	27543		9.15e-08	9.15e-08	1756	82	0.046697		1	1	70	4	0.0571429
GO:BP	lipid metabolic process	GO:0006629	1421	27543		9.2e-08	9.2e-08	1451	134	0.0923501		1	1	495	32	0.0646465
GO:BP	positive regulation of locomotion	GO:0040017	606	27543		9.27e-08	9.27e-08	1752	83	0.0473744		0.0460541	0.0460541	708	34	0.0480226
GO:BP	long-term synaptic depression	GO:0060292	35	27543		9.31e-08	9.31e-08	1371	15	0.0109409		0.462335	0.462335	233	4	0.0171674
GO:BP	calcium-mediated signaling	GO:0019722	198	27543		9.61e-08	9.61e-08	1720	40	0.0232558		1	1	796	15	0.0188442
GO:BP	peptidyl-serine modification	GO:0018209	355	27543		1.09e-07	1.09e-07	1331	49	0.0368144		1	1	250	8	0.032
GO:BP	regulation of synapse assembly	GO:0051963	117	27543		1.22e-07	1.22e-07	1658	29	0.017491		0.00408031	0.00408031	706	14	0.01983
GO:BP	receptor clustering	GO:0043113	72	27543		1.23e-07	1.23e-07	1413	21	0.014862		1	1	584	6	0.010274
GO:BP	negative regulation of cellular component movement	GO:0051271	302	27543		1.23e-07	1.23e-07	1746	52	0.0297824		1	1	362	11	0.0303867
GO:BP	receptor internalization	GO:0031623	128	27543		1.27e-07	1.27e-07	1720	31	0.0180233		1	1	634	9	0.0141956
GO:BP	regulation of Wnt signaling pathway	GO:0030111	306	27543		1.45e-07	1.45e-07	1730	52	0.0300578		1	1	878	21	0.023918
GO:BP	cellular response to transforming growth factor beta stimulus	GO:0071560	244	27543		1.51e-07	1.51e-07	1655	44	0.0265861		1	1	762	5	0.00656168
GO:BP	neuron apoptotic process	GO:0051402	303	27543		1.57e-07	1.57e-07	1752	52	0.0296804		0.0152336	0.0152336	677	22	0.0324963
GO:BP	maintenance of synapse structure	GO:0099558	34	27543		1.67e-07	1.67e-07	1482	15	0.0101215		1	1	29	1	0.0344828
GO:BP	positive regulation of cellular protein metabolic process	GO:0032270	1437	27543		1.7e-07	1.7e-07	1756	155	0.0882688		1	1	406	26	0.0640394
GO:BP	negative regulation of secretion by cell	GO:1903531	175	27543		1.72e-07	1.72e-07	1737	37	0.0213011		3.19081e-06	3.19081e-06	794	23	0.0289673
GO:BP	hindbrain development	GO:0030902	182	27543		1.72e-07	1.72e-07	1749	38	0.0217267		1	1	766	12	0.0156658
GO:BP	maintenance of postsynaptic specialization structure	GO:0098880	18	27543		1.79e-07	1.79e-07	1312	11	0.00838415		1	1	-1	-1	1
GO:BP	negative regulation of cell migration	GO:0030336	278	27543		1.9e-07	1.9e-07	1746	49	0.0280641		1	1	362	10	0.0276243
GO:BP	regulation of potassium ion transport	GO:0043266	106	27543		2.03e-07	2.03e-07	1632	27	0.0165441		0.00130087	0.00130087	821	15	0.0182704
GO:BP	negative regulation of locomotion	GO:0040013	325	27543		2.1e-07	2.1e-07	1746	54	0.0309278		0.0654004	0.0654004	362	15	0.0414365
GO:BP	adenylate cyclase-inhibiting G protein-coupled receptor signaling pathway	GO:0007193	74	27543		2.14e-07	2.14e-07	1736	23	0.0132488		4.33e-10	4.33e-10	791	19	0.0240202
GO:BP	regulation of neuron apoptotic process	GO:0043523	269	27543		2.14e-07	2.14e-07	1752	48	0.0273973		0.00800427	0.00800427	677	21	0.0310192
GO:BP	positive regulation of apoptotic process	GO:0043065	583	27543		2.14e-07	2.14e-07	1756	80	0.0455581		1	1	70	4	0.0571429
GO:BP	gliogenesis	GO:0042063	341	27543		2.19e-07	2.19e-07	1416	49	0.0346045		8.70981e-05	8.70981e-05	772	30	0.0388601
GO:BP	negative regulation of secretion	GO:0051048	202	27543		2.46e-07	2.46e-07	1737	40	0.0230282		1.46e-08	1.46e-08	794	28	0.0352645
GO:BP	regulation of cellular response to growth factor stimulus	GO:0090287	293	27543		2.47e-07	2.47e-07	1722	50	0.029036		1	1	872	18	0.0206422
GO:BP	positive regulation of cell motility	GO:2000147	588	27543		2.93e-07	2.93e-07	1752	80	0.0456621		0.312826	0.312826	805	34	0.042236
GO:BP	response to transforming growth factor beta	GO:0071559	249	27543		3e-07	3e-07	1655	44	0.0265861		1	1	87	1	0.0114943
GO:BP	negative regulation of cell motility	GO:2000146	292	27543		3.53e-07	3.53e-07	1746	50	0.0286369		1	1	362	10	0.0276243
GO:BP	regulation of dopamine secretion	GO:0014059	40	27543		3.73e-07	3.73e-07	1530	16	0.0104575		2.40378e-05	2.40378e-05	791	11	0.0139064
GO:BP	dopamine secretion	GO:0014046	40	27543		3.73e-07	3.73e-07	1530	16	0.0104575		2.40378e-05	2.40378e-05	791	11	0.0139064
GO:BP	striated muscle cell differentiation	GO:0051146	304	27543		3.95e-07	3.95e-07	1735	51	0.0293948		1	1	850	18	0.0211765
GO:BP	catecholamine transport	GO:0051937	83	27543		4.57e-07	4.57e-07	1737	24	0.0138169		4.06e-09	4.06e-09	791	19	0.0240202
GO:BP	cardiac muscle contraction	GO:0060048	131	27543		4.82e-07	4.82e-07	1448	28	0.019337		0.616427	0.616427	760	12	0.0157895
GO:BP	cell junction maintenance	GO:0034331	56	27543		4.9e-07	4.9e-07	1050	16	0.0152381		1	1	849	5	0.00588928
GO:BP	negative regulation of transcription by RNA polymerase II	GO:0000122	971	27543		5.08e-07	5.08e-07	1735	113	0.0651297		1	1	345	20	0.057971
GO:BP	positive regulation of cellular component movement	GO:0051272	606	27543		5.36e-07	5.36e-07	1752	81	0.0462329		0.225179	0.225179	611	29	0.0474632
GO:BP	cell-substrate junction organization	GO:0150115	97	27543		5.46e-07	5.46e-07	1742	26	0.0149254		1	1	79	2	0.0253165
GO:BP	ameboidal-type cell migration	GO:0001667	430	27543		5.53e-07	5.53e-07	1752	64	0.0365297		0.940053	0.940053	805	26	0.0322981
GO:BP	positive regulation of calcium ion transport	GO:0051928	141	27543		5.58e-07	5.58e-07	1746	32	0.0183276		0.0852081	0.0852081	865	15	0.017341
GO:BP	multicellular organismal homeostasis	GO:0048871	533	27543		5.82e-07	5.82e-07	1752	74	0.0422374		1	1	822	24	0.0291971
GO:BP	Ras protein signal transduction	GO:0007265	336	27543		6.09e-07	6.09e-07	1736	54	0.031106		1	1	594	17	0.0286195
GO:BP	muscle organ development	GO:0007517	346	27543		6.34e-07	6.34e-07	1736	55	0.031682		1	1	735	18	0.0244898
GO:BP	response to steroid hormone	GO:0048545	354	27543		6.52e-07	6.52e-07	1746	56	0.0320733		1	1	781	19	0.0243278
GO:BP	maintenance of postsynaptic density structure	GO:0099562	12	27543		6.6e-07	6.6e-07	1312	9	0.00685976		1	1	-1	-1	1
GO:BP	cell-substrate junction assembly	GO:0007044	91	27543		6.83e-07	6.83e-07	1742	25	0.0143513		1	1	79	2	0.0253165
GO:BP	morphogenesis of an epithelium	GO:0002009	540	27543		7.04e-07	7.04e-07	1736	74	0.0426267		1	1	689	25	0.0362845
GO:BP	anion transport	GO:0006820	548	27543		7.33e-07	7.33e-07	1746	75	0.0429553		0.00939509	0.00939509	791	36	0.045512
GO:BP	synaptic vesicle fusion to presynaptic active zone membrane	GO:0031629	21	27543		7.35e-07	7.35e-07	1210	11	0.00909091		1	1	564	4	0.0070922
GO:BP	regulation of actin cytoskeleton organization	GO:0032956	365	27543		7.4e-07	7.4e-07	1697	56	0.0329994		1	1	552	17	0.0307971
GO:BP	vascular process in circulatory system	GO:0003018	222	27543		7.6e-07	7.6e-07	1632	40	0.0245098		0.0903036	0.0903036	362	12	0.0331492
GO:BP	heart morphogenesis	GO:0003007	263	27543		7.79e-07	7.79e-07	1736	46	0.0264977		0.905128	0.905128	828	19	0.0229469
GO:BP	regulation of calcium ion transmembrane transporter activity	GO:1901019	85	27543		8.88e-07	8.88e-07	1448	22	0.0151934		1	1	865	9	0.0104046
GO:BP	regulation of neuron migration	GO:2001222	49	27543		8.98e-07	8.98e-07	1276	16	0.0125392		1	1	95	2	0.0210526
GO:BP	response to cocaine	GO:0042220	60	27543		9.03e-07	9.03e-07	1737	20	0.0115141		0.663949	0.663949	791	8	0.0101138
GO:BP	organic hydroxy compound transport	GO:0015850	292	27543		1.29091e-06	1.29091e-06	1754	49	0.0279361		0.00978509	0.00978509	791	24	0.0303413
GO:BP	vasoconstriction	GO:0042310	104	27543		1.30931e-06	1.30931e-06	1424	24	0.0168539		0.000379517	0.000379517	760	15	0.0197368
GO:BP	sensory organ development	GO:0007423	627	27543		1.34053e-06	1.34053e-06	1756	82	0.046697		0.01311	0.01311	819	40	0.04884
GO:BP	protein transport	GO:0015031	1556	27543		1.37535e-06	1.37535e-06	957	102	0.106583		1	1	816	57	0.0698529
GO:BP	vesicle fusion to plasma membrane	GO:0099500	22	27543		1.41052e-06	1.41052e-06	1210	11	0.00909091		1	1	564	4	0.0070922
GO:BP	neuron projection extension	GO:1990138	197	27543		1.56357e-06	1.56357e-06	1736	38	0.0218894		0.0160246	0.0160246	38	5	0.131579
GO:BP	regulation of synaptic vesicle fusion to presynaptic active zone membrane	GO:0031630	10	27543		1.56714e-06	1.56714e-06	1210	8	0.00661157		1	1	564	3	0.00531915
GO:BP	regulation of synaptic vesicle membrane organization	GO:1901632	10	27543		1.56714e-06	1.56714e-06	1210	8	0.00661157		1	1	564	3	0.00531915
GO:BP	regulation of cell size	GO:0008361	206	27543		1.63279e-06	1.63279e-06	1658	38	0.0229192		1	1	811	13	0.0160296
GO:BP	negative regulation of phosphorylation	GO:0042326	387	27543		1.67928e-06	1.67928e-06	1363	50	0.0366838		1	1	828	18	0.0217391
GO:BP	heart contraction	GO:0060047	235	27543		1.80931e-06	1.80931e-06	1448	38	0.0262431		0.0116153	0.0116153	796	21	0.0263819
GO:BP	muscle cell development	GO:0055001	207	27543		1.91022e-06	1.91022e-06	1736	39	0.0224654		1	1	850	13	0.0152941
GO:BP	negative regulation of protein phosphorylation	GO:0001933	342	27543		2.02281e-06	2.02281e-06	1311	45	0.0343249		1	1	828	18	0.0217391
GO:BP	vocalization behavior	GO:0071625	21	27543		2.03403e-06	2.03403e-06	1332	11	0.00825826		1	1	735	3	0.00408163
GO:BP	establishment of protein localization	GO:0045184	1671	27543		2.07353e-06	2.07353e-06	1319	136	0.103108		1	1	816	59	0.0723039
GO:BP	negative regulation of neurogenesis	GO:0050768	159	27543		2.4352e-06	2.4352e-06	1722	33	0.0191638		0.00270895	0.00270895	358	12	0.0335196
GO:BP	fear response	GO:0042596	57	27543		2.4968e-06	2.4968e-06	1737	19	0.0109384		2.90391e-05	2.90391e-05	687	12	0.0174672
GO:BP	positive regulation of transcription by RNA polymerase II	GO:0045944	1284	27543		2.58587e-06	2.58587e-06	1756	138	0.0785877		1	1	183	17	0.0928962
GO:BP	regulation of hormone levels	GO:0010817	582	27543		2.678e-06	2.678e-06	1756	77	0.0438497		0.00791189	0.00791189	801	38	0.0474407
GO:BP	regulation of protein localization to cell periphery	GO:1904375	138	27543		2.75724e-06	2.75724e-06	1479	28	0.0189317		1	1	809	10	0.0123609
GO:BP	response to alkaloid	GO:0043279	119	27543		2.76423e-06	2.76423e-06	1737	28	0.0161197		0.726715	0.726715	76	4	0.0526316
GO:BP	negative regulation of transcription, DNA-templated	GO:0045892	1375	27543		2.80772e-06	2.80772e-06	1735	144	0.0829971		1	1	345	25	0.0724638
GO:BP	anatomical structure homeostasis	GO:0060249	318	27543		2.83083e-06	2.83083e-06	1752	51	0.0291096		1	1	723	18	0.0248963
GO:BP	regulation of dendritic spine morphogenesis	GO:0061001	57	27543		2.9347e-06	2.9347e-06	830	14	0.0168675		1	1	790	6	0.00759494
GO:BP	negative regulation of metabolic process	GO:0009892	3558	27543		2.95217e-06	2.95217e-06	1701	304	0.178718		1	1	15	5	0.333333
GO:BP	positive regulation of synaptic transmission, glutamatergic	GO:0051968	36	27543		3.06839e-06	3.06839e-06	1416	14	0.00988701		1	1	33	2	0.0606061
GO:BP	negative regulation of nucleic acid-templated transcription	GO:1903507	1377	27543		3.0954e-06	3.0954e-06	1735	144	0.0829971		1	1	345	25	0.0724638
GO:BP	peptide transport	GO:0015833	312	27543		3.16128e-06	3.16128e-06	1100	38	0.0345455		0.0038582	0.0038582	801	26	0.0324594
GO:BP	nerve development	GO:0021675	83	27543		3.16977e-06	3.16977e-06	1749	23	0.0131504		0.221291	0.221291	766	10	0.0130548
GO:BP	negative regulation of RNA biosynthetic process	GO:1902679	1378	27543		3.2497e-06	3.2497e-06	1735	144	0.0829971		1	1	345	25	0.0724638
GO:BP	muscle cell proliferation	GO:0033002	256	27543		3.3336e-06	3.3336e-06	1736	44	0.0253456		1	1	71	4	0.056338
GO:BP	transforming growth factor beta receptor signaling pathway	GO:0007179	185	27543		3.65234e-06	3.65234e-06	1655	35	0.021148		1	1	762	4	0.00524934
GO:BP	positive regulation of transcription, DNA-templated	GO:0045893	1688	27543		3.84967e-06	3.84967e-06	1756	170	0.0968109		1	1	183	20	0.10929
GO:BP	positive regulation of nucleic acid-templated transcription	GO:1903508	1688	27543		3.84967e-06	3.84967e-06	1756	170	0.0968109		1	1	183	20	0.10929
GO:BP	muscle adaptation	GO:0043500	125	27543		3.98203e-06	3.98203e-06	1448	26	0.0179558		1	1	856	10	0.0116822
GO:BP	regulation of calcium ion transmembrane transport	GO:1903169	186	27543		3.99982e-06	3.99982e-06	1736	36	0.0207373		0.186216	0.186216	865	17	0.0196532
GO:BP	positive regulation of biosynthetic process	GO:0009891	2080	27543		4.06545e-06	4.06545e-06	1459	173	0.118574		1	1	183	22	0.120219
GO:BP	regulation of establishment of protein localization	GO:0070201	571	27543		4.2019e-06	4.2019e-06	1155	57	0.0493506		1	1	801	21	0.0262172
GO:BP	neuron cellular homeostasis	GO:0070050	34	27543		4.47842e-06	4.47842e-06	1563	14	0.00895713		1	1	723	3	0.00414938
GO:BP	regulation of protein transport	GO:0051223	542	27543		4.53067e-06	4.53067e-06	1155	55	0.047619		1	1	801	21	0.0262172
GO:BP	negative regulation of nervous system development	GO:0051961	163	27543		4.75772e-06	4.75772e-06	1722	33	0.0191638		0.00352208	0.00352208	358	12	0.0335196
GO:BP	response to metal ion	GO:0010038	376	27543		4.89104e-06	4.89104e-06	801	35	0.0436954		0.000220249	0.000220249	813	32	0.0393604
GO:BP	neurotransmitter receptor internalization	GO:0099590	32	27543		4.92377e-06	4.92377e-06	1697	14	0.00824985		1	1	634	4	0.00630915
GO:BP	transmembrane receptor protein serine/threonine kinase signaling pathway	GO:0007178	385	27543		4.93864e-06	4.93864e-06	1598	54	0.0337922		1	1	447	14	0.0313199
GO:BP	positive regulation of RNA biosynthetic process	GO:1902680	1694	27543		4.9989e-06	4.9989e-06	1756	170	0.0968109		1	1	183	20	0.10929
GO:BP	peptide secretion	GO:0002790	290	27543		5.14142e-06	5.14142e-06	1100	36	0.0327273		0.00329465	0.00329465	801	25	0.031211
GO:BP	negative regulation of cellular biosynthetic process	GO:0031327	1677	27543		5.16131e-06	5.16131e-06	1735	167	0.0962536		1	1	15	4	0.266667
GO:BP	regulation of supramolecular fiber organization	GO:1902903	385	27543		5.23176e-06	5.23176e-06	1694	56	0.0330579		0.262152	0.262152	79	7	0.0886076
GO:BP	ligand-gated ion channel signaling pathway	GO:1990806	27	27543		5.3053e-06	5.3053e-06	1725	13	0.00753623		7.05708e-05	7.05708e-05	778	9	0.0115681
GO:BP	ionotropic glutamate receptor signaling pathway	GO:0035235	27	27543		5.3053e-06	5.3053e-06	1725	13	0.00753623		7.05708e-05	7.05708e-05	778	9	0.0115681
GO:BP	blood vessel diameter maintenance	GO:0097746	166	27543		5.31497e-06	5.31497e-06	1424	30	0.0210674		0.00819553	0.00819553	760	17	0.0223684
GO:BP	regulation of tube diameter	GO:0035296	166	27543		5.31497e-06	5.31497e-06	1424	30	0.0210674		0.00819553	0.00819553	760	17	0.0223684
GO:BP	cardiac chamber development	GO:0003205	188	27543		5.41472e-06	5.41472e-06	1736	36	0.0207373		1	1	828	14	0.0169082
GO:BP	postsynaptic membrane organization	GO:0001941	47	27543		5.47344e-06	5.47344e-06	1292	15	0.0116099		1	1	214	3	0.0140187
GO:BP	cellular response to external stimulus	GO:0071496	375	27543		5.51871e-06	5.51871e-06	1459	50	0.03427		1	1	828	19	0.0229469
GO:BP	multicellular organismal response to stress	GO:0033555	100	27543		5.60746e-06	5.60746e-06	1737	25	0.0143926		9.7e-07	9.7e-07	687	17	0.0247453
GO:BP	cellular response to stress	GO:0033554	1866	27543		5.63919e-06	5.63919e-06	1752	183	0.104452		1	1	15	3	0.2
GO:BP	calcium ion-regulated exocytosis of neurotransmitter	GO:0048791	20	27543		5.65722e-06	5.65722e-06	1155	10	0.00865801		1	1	673	3	0.00445765
GO:BP	regulation of Ras protein signal transduction	GO:0046578	196	27543		6.00432e-06	6.00432e-06	1507	34	0.0225614		1	1	79	3	0.0379747
GO:BP	cellular response to steroid hormone stimulus	GO:0071383	214	27543		6.08588e-06	6.08588e-06	1746	39	0.0223368		1	1	352	7	0.0198864
GO:BP	regulation of tube size	GO:0035150	167	27543		6.16258e-06	6.16258e-06	1424	30	0.0210674		0.00889402	0.00889402	760	17	0.0223684
GO:BP	negative regulation of intracellular signal transduction	GO:1902532	516	27543		6.47849e-06	6.47849e-06	1727	69	0.0399537		1	1	828	22	0.02657
GO:BP	sensory perception of pain	GO:0019233	146	27543		6.49153e-06	6.49153e-06	984	23	0.023374		8.01e-08	8.01e-08	580	20	0.0344828
GO:BP	response to extracellular stimulus	GO:0009991	569	27543		6.49736e-06	6.49736e-06	1463	66	0.0451128		1	1	672	23	0.0342262
GO:BP	protein localization to postsynaptic specialization membrane	GO:0099633	30	27543		6.96425e-06	6.96425e-06	1544	13	0.00841969		0.0268127	0.0268127	281	5	0.0177936
GO:BP	neurotransmitter receptor localization to postsynaptic specialization membrane	GO:0099645	30	27543		6.96425e-06	6.96425e-06	1544	13	0.00841969		0.0268127	0.0268127	281	5	0.0177936
GO:BP	regulation of G protein-coupled receptor signaling pathway	GO:0008277	133	27543		7.50304e-06	7.50304e-06	819	20	0.02442		0.000125904	0.000125904	796	18	0.0226131
GO:BP	protein homooligomerization	GO:0051260	196	27543		7.71294e-06	7.71294e-06	1602	35	0.0218477		4.49372e-05	4.49372e-05	618	20	0.0323625
GO:BP	glycerolipid metabolic process	GO:0046486	390	27543		7.75175e-06	7.75175e-06	1371	49	0.0357403		1	1	495	13	0.0262626
GO:BP	synaptic vesicle membrane organization	GO:0048499	25	27543		7.76146e-06	7.76146e-06	901	10	0.0110988		1	1	564	4	0.0070922
GO:BP	adenylate cyclase-modulating G protein-coupled receptor signaling pathway	GO:0007188	226	27543		7.80251e-06	7.80251e-06	1736	40	0.0230415		5.34296e-06	5.34296e-06	796	26	0.0326633
GO:BP	response to inorganic substance	GO:0010035	653	27543		8.39882e-06	8.39882e-06	1572	76	0.0483461		0.00523354	0.00523354	813	42	0.0516605
GO:BP	ephrin receptor signaling pathway	GO:0048013	38	27543		8.95141e-06	8.95141e-06	1722	15	0.0087108		1	1	858	6	0.00699301
GO:BP	amino acid transport	GO:0006865	163	27543		9.08801e-06	9.08801e-06	1486	30	0.0201884		0.247636	0.247636	727	14	0.0192572
GO:BP	peptide hormone secretion	GO:0030072	283	27543		9.50667e-06	9.50667e-06	1100	35	0.0318182		0.00705891	0.00705891	801	24	0.0299625
GO:BP	endocannabinoid signaling pathway	GO:0071926	6	27543		9.74413e-06	9.74413e-06	395	5	0.0126582		0.249733	0.249733	77	2	0.025974
GO:BP	response to light stimulus	GO:0009416	316	27543		9.76642e-06	9.76642e-06	1182	39	0.0329949		1	1	181	8	0.0441989
GO:BP	regulation of vasoconstriction	GO:0019229	82	27543		1.01859e-05	1.01859e-05	1558	21	0.0134788		0.00192664	0.00192664	687	12	0.0174672
GO:BP	negative regulation of nucleobase-containing compound metabolic process	GO:0045934	1620	27543		1.04359e-05	1.04359e-05	1623	153	0.0942699		1	1	186	15	0.0806452
GO:BP	dopamine transport	GO:0015872	55	27543		1.05547e-05	1.05547e-05	1530	17	0.0111111		8.89639e-05	8.89639e-05	791	12	0.0151707
GO:BP	negative regulation of cell population proliferation	GO:0008285	736	27543		1.06358e-05	1.06358e-05	1722	88	0.0511034		1	1	841	36	0.0428062
GO:BP	negative regulation of biosynthetic process	GO:0009890	1720	27543		1.08055e-05	1.08055e-05	1722	168	0.097561		1	1	15	4	0.266667
GO:BP	response to peptide	GO:1901652	516	27543		1.11121e-05	1.11121e-05	1750	69	0.0394286		1	1	31	3	0.0967742
GO:BP	smooth muscle contraction	GO:0006939	113	27543		1.11862e-05	1.11862e-05	1450	24	0.0165517		3.17e-10	3.17e-10	796	23	0.0288945
GO:BP	wound healing	GO:0042060	391	27543		1.21494e-05	1.21494e-05	1754	57	0.0324971		1	1	766	18	0.0234987
GO:BP	striated muscle hypertrophy	GO:0014897	105	27543		1.21841e-05	1.21841e-05	1448	23	0.015884		1	1	856	10	0.0116822
GO:BP	regulation of response to stress	GO:0080134	1317	27543		1.23492e-05	1.23492e-05	1754	138	0.0786773		1	1	77	9	0.116883
GO:BP	cellular response to lipid	GO:0071396	747	27543		1.2476e-05	1.2476e-05	1756	90	0.0512528		1	1	70	5	0.0714286
GO:BP	maintenance of location	GO:0051235	355	27543		1.29397e-05	1.29397e-05	1736	53	0.03053		1	1	865	16	0.0184971
GO:BP	regulation of vesicle fusion	GO:0031338	26	27543		1.31328e-05	1.31328e-05	1210	11	0.00909091		1	1	744	4	0.00537634
GO:BP	regulation of muscle adaptation	GO:0043502	97	27543		1.32171e-05	1.32171e-05	1448	22	0.0151934		1	1	856	8	0.00934579
GO:BP	regulation of potassium ion transmembrane transport	GO:1901379	87	27543		1.32185e-05	1.32185e-05	1632	22	0.0134804		0.0225591	0.0225591	821	12	0.0146163
GO:BP	organelle localization	GO:0051640	546	27543		1.45084e-05	1.45084e-05	1733	71	0.0409694		1	1	739	28	0.037889
GO:BP	positive regulation of long-term synaptic potentiation	GO:1900273	29	27543		1.50276e-05	1.50276e-05	1073	11	0.0102516		1	1	1	1	1
GO:BP	connective tissue development	GO:0061448	286	27543		1.51121e-05	1.51121e-05	1746	46	0.0263459		1	1	828	17	0.0205314
GO:BP	biosynthetic process	GO:0009058	5876	27543		1.51663e-05	1.51663e-05	1737	468	0.26943		1	1	22	8	0.363636
GO:BP	response to lipid	GO:0033993	1102	27543		1.5981e-05	1.5981e-05	1756	120	0.0683371		1	1	76	10	0.131579
GO:BP	tissue migration	GO:0090130	305	27543		1.63277e-05	1.63277e-05	1752	48	0.0273973		1	1	523	14	0.0267686
GO:BP	intracellular transport	GO:0046907	1507	27543		1.64466e-05	1.64466e-05	1103	107	0.0970082		1	1	755	54	0.0715232
GO:BP	forebrain cell migration	GO:0021885	69	27543		1.69937e-05	1.69937e-05	1569	19	0.0121096		1	1	834	8	0.00959233
GO:BP	negative regulation of RNA metabolic process	GO:0051253	1489	27543		1.72696e-05	1.72696e-05	1735	150	0.0864553		1	1	186	15	0.0806452
GO:BP	epithelial cell migration	GO:0010631	296	27543		1.75568e-05	1.75568e-05	1752	47	0.0268265		1	1	523	14	0.0267686
GO:BP	positive regulation of cellular biosynthetic process	GO:0031328	2030	27543		1.77001e-05	1.77001e-05	1459	167	0.114462		1	1	183	22	0.120219
GO:BP	muscle hypertrophy	GO:0014896	107	27543		1.7914e-05	1.7914e-05	1448	23	0.015884		1	1	856	10	0.0116822
GO:BP	inorganic cation import across plasma membrane	GO:0098659	104	27543		1.79385e-05	1.79385e-05	1626	24	0.0147601		1	1	556	4	0.00719425
GO:BP	inorganic ion import across plasma membrane	GO:0099587	104	27543		1.79385e-05	1.79385e-05	1626	24	0.0147601		1	1	556	4	0.00719425
GO:BP	organic substance biosynthetic process	GO:1901576	5770	27543		1.93752e-05	1.93752e-05	1737	460	0.264824		1	1	22	8	0.363636
GO:BP	regulation of peptide transport	GO:0090087	237	27543		1.95282e-05	1.95282e-05	1100	31	0.0281818		0.155761	0.155761	801	19	0.0237204
GO:BP	glial cell differentiation	GO:0010001	250	27543		1.99068e-05	1.99068e-05	1416	37	0.0261299		2.39954e-05	2.39954e-05	772	26	0.0336788
GO:BP	import into cell	GO:0098657	229	27543		2.05199e-05	2.05199e-05	1413	35	0.02477		1	1	791	14	0.0176991
GO:BP	regulation of cell morphogenesis involved in differentiation	GO:0010769	114	27543		2.06353e-05	2.06353e-05	1732	26	0.0150115		1	1	93	3	0.0322581
GO:BP	negative regulation of growth	GO:0045926	258	27543		2.26426e-05	2.26426e-05	1569	40	0.0254939		1	1	831	18	0.0216607
GO:BP	epithelium migration	GO:0090132	299	27543		2.4355e-05	2.4355e-05	1752	47	0.0268265		1	1	523	14	0.0267686
GO:BP	response to calcium ion	GO:0051592	150	27543		2.80179e-05	2.80179e-05	553	17	0.0307414		0.000112568	0.000112568	697	18	0.025825
GO:BP	postsynapse assembly	GO:0099068	33	27543		2.8451e-05	2.8451e-05	1544	13	0.00841969		1	1	677	2	0.00295421
GO:BP	regulation of action potential	GO:0098900	69	27543		2.88375e-05	2.88375e-05	1621	19	0.0117212		0.242484	0.242484	437	7	0.0160183
GO:BP	cell-cell adhesion via plasma-membrane adhesion molecules	GO:0098742	277	27543		2.92431e-05	2.92431e-05	1655	43	0.0259819		0.00819573	0.00819573	713	22	0.0308555
GO:BP	cardiac muscle hypertrophy	GO:0003300	101	27543		2.93465e-05	2.93465e-05	1448	22	0.0151934		1	1	856	8	0.00934579
GO:BP	regulation of heart contraction	GO:0008016	196	27543		3.12657e-05	3.12657e-05	1448	32	0.0220994		0.037047	0.037047	796	18	0.0226131
GO:BP	neuromuscular process controlling balance	GO:0050885	64	27543		3.21389e-05	3.21389e-05	1578	18	0.0114068		1	1	735	6	0.00816326
GO:BP	regulation of dendritic spine development	GO:0060998	81	27543		3.27469e-05	3.27469e-05	1688	21	0.0124408		1	1	9	1	0.111111
GO:BP	lung development	GO:0030324	228	27543		3.33753e-05	3.33753e-05	1737	39	0.0224525		1	1	7	1	0.142857
GO:BP	negative regulation of cell death	GO:0060548	1180	27543		3.40795e-05	3.40795e-05	1752	125	0.071347		1	1	224	20	0.0892857
GO:BP	focal adhesion assembly	GO:0048041	81	27543		3.48349e-05	3.48349e-05	1694	21	0.0123967		1	1	79	2	0.0253165
GO:BP	cellular response to extracellular stimulus	GO:0031668	270	27543		3.57549e-05	3.57549e-05	1459	39	0.0267306		1	1	508	9	0.0177165
GO:BP	nervous system process	GO:0050877	2646	27543		3.58786e-05	3.58786e-05	893	138	0.154535		0.000503784	0.000503784	584	95	0.162671
GO:BP	negative regulation of macromolecule metabolic process	GO:0010605	3339	27543		3.59128e-05	3.59128e-05	1698	282	0.166078		1	1	15	5	0.333333
GO:BP	mesenchyme development	GO:0060485	286	27543		3.70045e-05	3.70045e-05	1736	45	0.0259217		1	1	828	13	0.0157005
GO:BP	negative regulation of neuron death	GO:1901215	255	27543		3.74633e-05	3.74633e-05	1752	42	0.0239726		0.0110934	0.0110934	671	20	0.0298063
GO:BP	neuromuscular junction development	GO:0007528	54	27543		3.92799e-05	3.92799e-05	1485	16	0.0107744		1	1	588	5	0.0085034
GO:BP	positive regulation of macromolecule biosynthetic process	GO:0010557	1911	27543		3.98006e-05	3.98006e-05	1756	183	0.104214		1	1	183	22	0.120219
GO:BP	hormone transport	GO:0009914	373	27543		4.0795e-05	4.0795e-05	1756	54	0.0307517		0.000425565	0.000425565	801	31	0.0387016
GO:BP	membrane hyperpolarization	GO:0060081	17	27543		4.51762e-05	4.51762e-05	858	8	0.00932401		1	1	-1	-1	1
GO:BP	hormone secretion	GO:0046879	364	27543		4.54634e-05	4.54634e-05	1756	53	0.0301822		0.000247345	0.000247345	801	31	0.0387016
GO:BP	regulation of receptor internalization	GO:0002090	74	27543		4.59111e-05	4.59111e-05	1720	20	0.0116279		1	1	791	7	0.00884956
GO:BP	response to nutrient levels	GO:0031667	534	27543		4.63528e-05	4.63528e-05	1463	61	0.0416951		1	1	672	23	0.0342262
GO:BP	regulation of behavior	GO:0050795	95	27543		4.74065e-05	4.74065e-05	1737	23	0.0132412		3.56663e-06	3.56663e-06	791	17	0.0214918
GO:BP	regulation of blood pressure	GO:0008217	211	27543		4.75144e-05	4.75144e-05	1749	37	0.0211549		0.00229545	0.00229545	218	11	0.0504587
GO:BP	respiratory tube development	GO:0030323	231	27543		4.84126e-05	4.84126e-05	1737	39	0.0224525		1	1	7	1	0.142857
GO:BP	endothelial cell migration	GO:0043542	220	27543		4.89212e-05	4.89212e-05	1752	38	0.0216895		1	1	801	13	0.0162297
GO:BP	regulation of postsynaptic neurotransmitter receptor internalization	GO:0099149	22	27543		4.89621e-05	4.89621e-05	1697	11	0.00648203		1	1	634	3	0.00473186
GO:BP	embryo development	GO:0009790	1236	27543		5.03245e-05	5.03245e-05	1736	128	0.0737327		1	1	828	46	0.0555556
GO:BP	negative regulation of cell projection organization	GO:0031345	207	27543		5.09724e-05	5.09724e-05	1629	35	0.0214856		1	1	358	8	0.0223464
GO:BP	regulation of peptide secretion	GO:0002791	234	27543		5.41928e-05	5.41928e-05	1100	30	0.0272727		0.401385	0.401385	801	18	0.0224719
GO:BP	myotube differentiation	GO:0014902	127	27543		5.51112e-05	5.51112e-05	1735	27	0.015562		1	1	712	5	0.00702247
GO:BP	cerebral cortex development	GO:0021987	123	27543		6.63063e-05	6.63063e-05	1569	25	0.0159337		1	1	627	10	0.015949
GO:BP	anatomical structure maturation	GO:0071695	272	27543		6.70102e-05	6.70102e-05	1736	43	0.0247696		1	1	137	6	0.0437956
GO:BP	hormone-mediated signaling pathway	GO:0009755	179	27543		6.74765e-05	6.74765e-05	1737	33	0.0189983		1	1	671	12	0.0178838
GO:BP	protein complex oligomerization	GO:0051259	263	27543		6.958e-05	6.958e-05	1602	40	0.0249688		0.00406803	0.00406803	309	14	0.0453074
GO:BP	amide transport	GO:0042886	349	27543		7.00801e-05	7.00801e-05	1100	38	0.0345455		0.0023174	0.0023174	833	29	0.0348139
GO:BP	actin-mediated cell contraction	GO:0070252	97	27543		7.06571e-05	7.06571e-05	1448	21	0.0145028		0.759676	0.759676	760	10	0.0131579
GO:BP	negative regulation of macromolecule biosynthetic process	GO:0010558	1613	27543		7.10854e-05	7.10854e-05	1623	149	0.0918053		1	1	15	4	0.266667
GO:BP	positive regulation of developmental growth	GO:0048639	205	27543		7.20012e-05	7.20012e-05	1750	36	0.0205714		0.78384	0.78384	19	3	0.157895
GO:BP	trans-synaptic signaling by endocannabinoid	GO:0099542	9	27543		7.40376e-05	7.40376e-05	730	6	0.00821918		0.596103	0.596103	77	2	0.025974
GO:BP	cannabinoid signaling pathway	GO:0038171	9	27543		7.40376e-05	7.40376e-05	730	6	0.00821918		0.596103	0.596103	77	2	0.025974
GO:BP	trans-synaptic signaling by lipid	GO:0099541	9	27543		7.40376e-05	7.40376e-05	730	6	0.00821918		0.596103	0.596103	77	2	0.025974
GO:BP	adult locomotory behavior	GO:0008344	97	27543		7.54514e-05	7.54514e-05	1741	23	0.0132108		1	1	791	8	0.0101138
GO:BP	cellular lipid metabolic process	GO:0044255	1037	27543		8.12745e-05	8.12745e-05	1371	93	0.0678337		1	1	495	23	0.0464646
GO:BP	regulation of cytosolic calcium ion concentration	GO:0051480	63	27543		8.26563e-05	8.26563e-05	1317	16	0.0121488		1	1	796	5	0.00628141
GO:BP	action potential propagation	GO:0098870	10	27543		8.79941e-05	8.79941e-05	1202	7	0.00582363		1	1	464	1	0.00215517
GO:BP	neuronal action potential propagation	GO:0019227	10	27543		8.79941e-05	8.79941e-05	1202	7	0.00582363		1	1	464	1	0.00215517
GO:BP	regulation of cell-substrate junction organization	GO:0150116	65	27543		8.85019e-05	8.85019e-05	1104	15	0.013587		1	1	481	3	0.00623701
GO:BP	cellular biosynthetic process	GO:0044249	5701	27543		9.51212e-05	9.51212e-05	1735	450	0.259366		1	1	22	8	0.363636
GO:BP	positive regulation of cell junction assembly	GO:1901890	119	27543		9.71222e-05	9.71222e-05	1658	25	0.0150784		0.00500581	0.00500581	706	14	0.01983
GO:BP	respiratory system development	GO:0060541	256	27543		9.84919e-05	9.84919e-05	1737	41	0.0236039		1	1	689	11	0.0159652
GO:BP	osteoblast differentiation	GO:0001649	220	27543		9.90185e-05	9.90185e-05	1722	37	0.0214866		1	1	872	17	0.0194954
GO:BP	central nervous system neuron differentiation	GO:0021953	193	27543		0.000104798	0.000104798	1634	33	0.0201958		0.0101319	0.0101319	457	14	0.0306346
GO:BP	regulation of protein depolymerization	GO:1901879	93	27543		0.000106908	0.000106908	1553	21	0.0135222		1	1	18	1	0.0555556
GO:BP	metencephalon development	GO:0022037	130	27543		0.000109444	0.000109444	1749	27	0.0154374		1	1	766	9	0.0117493
GO:BP	acidic amino acid transport	GO:0015800	70	27543		0.000112892	0.000112892	1370	17	0.0124088		0.713275	0.713275	681	8	0.0117474
GO:BP	import across plasma membrane	GO:0098739	181	27543		0.000116489	0.000116489	1403	29	0.02067		1	1	727	8	0.0110041
GO:BP	regulation of endocytosis	GO:0030100	228	27543		0.000119136	0.000119136	1309	32	0.0244461		1	1	634	11	0.0173502
GO:BP	regulation of peptide hormone secretion	GO:0090276	229	27543		0.000122304	0.000122304	1100	29	0.0263636		0.359234	0.359234	289	10	0.0346021
GO:BP	negative regulation of protein metabolic process	GO:0051248	1119	27543		0.000124044	0.000124044	1697	115	0.0677666		1	1	13	3	0.230769
GO:BP	response to mechanical stimulus	GO:0009612	252	27543		0.000125745	0.000125745	1246	33	0.0264848		0.0162831	0.0162831	820	22	0.0268293
GO:BP	gland development	GO:0048732	508	27543		0.000129423	0.000129423	1737	65	0.0374208		0.871034	0.871034	791	29	0.0366625
GO:BP	response to hypoxia	GO:0001666	325	27543		0.000133759	0.000133759	1755	48	0.0273504		1	1	791	16	0.0202276
GO:BP	positive regulation of protein transport	GO:0051222	313	27543		0.000134886	0.000134886	1155	36	0.0311688		1	1	11	1	0.0909091
GO:BP	cellular response to metal ion	GO:0071248	196	27543		0.000139503	0.000139503	1544	32	0.0207254		0.000373202	0.000373202	85	8	0.0941176
GO:BP	regulation of protein-containing complex disassembly	GO:0043244	129	27543		0.000146638	0.000146638	1553	25	0.0160979		1	1	18	1	0.0555556
GO:BP	mesenchymal cell differentiation	GO:0048762	231	27543		0.000147378	0.000147378	1736	38	0.0218894		1	1	828	12	0.0144928
GO:BP	negative chemotaxis	GO:0050919	46	27543		0.000151719	0.000151719	1697	15	0.00883913		1	1	358	4	0.0111732
GO:BP	positive regulation of establishment of protein localization	GO:1904951	329	27543		0.000158438	0.000158438	1155	37	0.0320346		1	1	11	1	0.0909091
GO:BP	actomyosin structure organization	GO:0031032	204	27543		0.000160786	0.000160786	1733	35	0.0201962		0.580547	0.580547	481	12	0.024948
GO:BP	regulation of actin filament organization	GO:0110053	277	27543		0.000164852	0.000164852	1694	42	0.0247934		1	1	79	5	0.0632911
GO:BP	cardiac chamber morphogenesis	GO:0003206	142	27543		0.000170797	0.000170797	1736	28	0.016129		0.220078	0.220078	828	14	0.0169082
GO:BP	regulation of voltage-gated calcium channel activity	GO:1901385	36	27543		0.000172327	0.000172327	1620	13	0.00802469		0.137642	0.137642	791	7	0.00884956
GO:BP	negative regulation of Wnt signaling pathway	GO:0030178	160	27543		0.000177844	0.000177844	1730	30	0.017341		1	1	15	2	0.133333
GO:BP	response to peptide hormone	GO:0043434	444	27543		0.000183508	0.000183508	1750	59	0.0337143		1	1	22	2	0.0909091
GO:BP	protein kinase B signaling	GO:0043491	212	27543		0.000185199	0.000185199	1754	36	0.0205245		1	1	11	2	0.181818
GO:BP	organophosphate metabolic process	GO:0019637	914	27543		0.000189223	0.000189223	1382	84	0.0607815		1	1	26	3	0.115385
GO:BP	regulation of neuron differentiation	GO:0045664	235	27543		0.000190295	0.000190295	1722	38	0.0220674		0.0628963	0.0628963	500	15	0.03
GO:BP	carbohydrate derivative metabolic process	GO:1901135	993	27543		0.000195712	0.000195712	1736	106	0.0610599		1	1	872	49	0.0561927
GO:BP	protein localization to extracellular region	GO:0071692	386	27543		0.000198695	0.000198695	1632	51	0.03125		0.215211	0.215211	816	26	0.0318627
GO:BP	negative regulation of protein-containing complex disassembly	GO:0043242	88	27543		0.000199792	0.000199792	1553	20	0.0128783		1	1	239	1	0.0041841
GO:BP	protein depolymerization	GO:0051261	122	27543		0.000199941	0.000199941	1553	24	0.015454		1	1	18	1	0.0555556
GO:BP	retrograde trans-synaptic signaling by endocannabinoid	GO:0098921	6	27543		0.000210363	0.000210363	730	5	0.00684931		1	1	77	1	0.012987
GO:BP	retrograde trans-synaptic signaling by lipid	GO:0098920	6	27543		0.000210363	0.000210363	730	5	0.00684931		1	1	77	1	0.012987
GO:BP	regulation of protein secretion	GO:0050708	291	27543		0.000215537	0.000215537	1155	34	0.0294372		1	1	801	15	0.0187266
GO:BP	regulation of focal adhesion assembly	GO:0051893	60	27543		0.00021883	0.00021883	1104	14	0.0126812		1	1	481	3	0.00623701
GO:BP	regulation of cell-substrate junction assembly	GO:0090109	60	27543		0.00021883	0.00021883	1104	14	0.0126812		1	1	481	3	0.00623701
GO:BP	epithelial cell development	GO:0002064	232	27543		0.000219306	0.000219306	1755	38	0.0216524		1	1	446	9	0.0201794
GO:BP	cardiac muscle tissue morphogenesis	GO:0055008	69	27543		0.000222933	0.000222933	220	8	0.0363636		0.0113155	0.0113155	512	9	0.0175781
GO:BP	cardiac muscle tissue growth	GO:0055017	104	27543		0.000239176	0.000239176	1579	22	0.0139329		1	1	727	6	0.0082531
GO:BP	negative regulation of catalytic activity	GO:0043086	776	27543		0.000239986	0.000239986	1693	86	0.0507974		1	1	828	33	0.0398551
GO:BP	G protein-coupled glutamate receptor signaling pathway	GO:0007216	16	27543		0.000250408	0.000250408	739	7	0.00947226		0.000397464	0.000397464	237	5	0.021097
GO:BP	regulation of protein serine/threonine kinase activity	GO:0071900	363	27543		0.00025138	0.00025138	1752	51	0.0291096		1	1	12	1	0.0833333
GO:BP	protein secretion	GO:0009306	378	27543		0.000256662	0.000256662	1632	50	0.0306373		0.153046	0.153046	816	26	0.0318627
GO:BP	heart growth	GO:0060419	113	27543		0.000259953	0.000259953	1579	23	0.0145662		1	1	727	7	0.00962861
GO:BP	positive regulation of axonogenesis	GO:0050772	92	27543		0.000265524	0.000265524	1658	21	0.0126659		1	1	811	9	0.0110974
GO:BP	synaptic membrane adhesion	GO:0099560	34	27543		0.000265575	0.000265575	1473	12	0.00814664		0.52616	0.52616	462	5	0.0108225
GO:BP	negative regulation of ion transport	GO:0043271	168	27543		0.000271786	0.000271786	1485	28	0.0188552		0.00390422	0.00390422	791	18	0.022756
GO:BP	cerebellum development	GO:0021549	119	27543		0.000272277	0.000272277	1749	25	0.0142939		1	1	766	8	0.0104439
GO:BP	circadian rhythm	GO:0007623	237	27543		0.000274026	0.000274026	1658	37	0.022316		0.403273	0.403273	791	18	0.022756
GO:BP	skeletal system development	GO:0001501	538	27543		0.000277747	0.000277747	1746	67	0.0383734		1	1	844	31	0.0367299
GO:BP	establishment of protein localization to extracellular region	GO:0035592	379	27543		0.000278994	0.000278994	1632	50	0.0306373		0.159815	0.159815	816	26	0.0318627
GO:BP	glucose homeostasis	GO:0042593	304	27543		0.000299406	0.000299406	1750	45	0.0257143		1	1	11	2	0.181818
GO:BP	carbohydrate homeostasis	GO:0033500	304	27543		0.000299406	0.000299406	1750	45	0.0257143		1	1	11	2	0.181818
GO:BP	cerebral cortex radial glia-guided migration	GO:0021801	26	27543		0.000300902	0.000300902	1264	10	0.00791139		1	1	834	4	0.00479616
GO:BP	telencephalon glial cell migration	GO:0022030	26	27543		0.000300902	0.000300902	1264	10	0.00791139		1	1	834	4	0.00479616
GO:BP	regulation of heart growth	GO:0060420	82	27543		0.000304801	0.000304801	1722	20	0.0116144		1	1	727	4	0.00550206
GO:BP	regulation of protein localization to plasma membrane	GO:1903076	112	27543		0.000307091	0.000307091	1479	22	0.0148749		1	1	809	9	0.0111248
GO:BP	telencephalon cell migration	GO:0022029	66	27543		0.000312006	0.000312006	1569	17	0.0108349		1	1	834	7	0.00839329
GO:BP	intracellular receptor signaling pathway	GO:0030522	244	27543		0.000317228	0.000317228	1689	38	0.0224985		1	1	352	8	0.0227273
GO:BP	positive regulation of cell morphogenesis involved in differentiation	GO:0010770	97	27543		0.000321151	0.000321151	1732	22	0.0127021		1	1	93	3	0.0322581
GO:BP	transmission of nerve impulse	GO:0019226	87	27543		0.000321462	0.000321462	1309	18	0.013751		0.242426	0.242426	464	8	0.0172414
GO:BP	synapse maturation	GO:0060074	30	27543		0.000323036	0.000323036	1741	12	0.00689259		1	1	717	2	0.0027894
GO:BP	regulation of long-term neuronal synaptic plasticity	GO:0048169	31	27543		0.000354734	0.000354734	1688	12	0.007109		1	1	59	2	0.0338983
GO:BP	regulation of circadian rhythm	GO:0042752	121	27543		0.000371322	0.000371322	1620	24	0.0148148		1	1	791	9	0.011378
GO:BP	regulation of protein-containing complex assembly	GO:0043254	425	27543		0.000373383	0.000373383	1642	54	0.0328867		1	1	744	23	0.030914
GO:BP	detection of mechanical stimulus	GO:0050982	54	27543		0.000373691	0.000373691	304	8	0.0263158		0.251878	0.251878	766	8	0.0104439
GO:BP	exploration behavior	GO:0035640	36	27543		0.000389053	0.000389053	1737	13	0.00748417		1	1	671	5	0.00745157
GO:BP	postsynaptic specialization assembly	GO:0098698	28	27543		0.000407676	0.000407676	1544	11	0.00712435		1	1	677	2	0.00295421
GO:BP	regulation of extent of cell growth	GO:0061387	119	27543		0.000409438	0.000409438	1658	24	0.0144753		1	1	811	11	0.0135635
GO:BP	regulation of cardiac muscle tissue growth	GO:0055021	76	27543		0.000413587	0.000413587	1722	19	0.0110337		1	1	727	4	0.00550206
GO:BP	endocytosis	GO:0006897	696	27543		0.000420632	0.000420632	1107	58	0.0523939		1	1	634	23	0.0362776
GO:BP	regulation of lipid metabolic process	GO:0019216	381	27543		0.000423227	0.000423227	1451	46	0.0317023		1	1	12	2	0.166667
GO:BP	response to decreased oxygen levels	GO:0036293	358	27543		0.000425269	0.000425269	1755	50	0.02849		1	1	60	3	0.05
GO:BP	postsynaptic neurotransmitter receptor internalization	GO:0098884	26	27543		0.000426116	0.000426116	1697	11	0.00648203		1	1	634	3	0.00473186
GO:BP	postsynaptic endocytosis	GO:0140239	26	27543		0.000426116	0.000426116	1697	11	0.00648203		1	1	634	3	0.00473186
GO:BP	phospholipid biosynthetic process	GO:0008654	234	27543		0.00042992	0.00042992	1419	33	0.0232558		1	1	861	8	0.00929152
GO:BP	postsynaptic signal transduction	GO:0098926	48	27543		0.000433688	0.000433688	1260	13	0.0103175		2.26507e-06	2.26507e-06	825	13	0.0157576
GO:BP	response to insulin	GO:0032868	278	27543		0.000444109	0.000444109	1750	42	0.024		1	1	587	7	0.011925
GO:BP	peptidyl-threonine phosphorylation	GO:0018107	118	27543		0.000461966	0.000461966	1311	21	0.0160183		1	1	22	1	0.0454545
GO:BP	substrate adhesion-dependent cell spreading	GO:0034446	107	27543		0.000474858	0.000474858	1732	23	0.0132794		1	1	79	2	0.0253165
GO:BP	regulation of cardiac muscle contraction	GO:0055117	73	27543		0.000484853	0.000484853	1448	17	0.0117403		1	1	197	2	0.0101523
GO:BP	regulation of muscle hypertrophy	GO:0014743	73	27543		0.000484853	0.000484853	1448	17	0.0117403		1	1	7	1	0.142857
GO:BP	regulation of hormone secretion	GO:0046883	301	27543		0.000488005	0.000488005	1100	33	0.03		0.00651287	0.00651287	108	9	0.0833333
GO:BP	positive regulation of RNA metabolic process	GO:0051254	1836	27543		0.000492353	0.000492353	1756	172	0.0979499		1	1	183	21	0.114754
GO:BP	regulation of striated muscle contraction	GO:0006942	90	27543		0.000493207	0.000493207	1448	19	0.0131215		1	1	197	2	0.0101523
GO:BP	regulation of cell-substrate adhesion	GO:0010810	223	27543		0.000500755	0.000500755	1732	36	0.0207852		1	1	587	13	0.0221465
GO:BP	detection of abiotic stimulus	GO:0009582	127	27543		0.000507316	0.000507316	305	11	0.0360656		0.32222	0.32222	845	13	0.0153846
GO:BP	response to starvation	GO:0042594	213	27543		0.000509997	0.000509997	1577	33	0.0209258		1	1	41	2	0.0487805
GO:BP	regulation of timing of cell differentiation	GO:0048505	11	27543		0.000515642	0.000515642	1350	7	0.00518519		1	1	766	2	0.00261097
GO:BP	synaptic vesicle priming	GO:0016082	23	27543		0.000518313	0.000518313	1155	9	0.00779221		1	1	475	2	0.00421053
GO:BP	negative regulation of programmed cell death	GO:0043069	1053	27543		0.000532377	0.000532377	1752	110	0.0627854		1	1	224	17	0.0758929
GO:BP	detection of external stimulus	GO:0009581	128	27543		0.000549606	0.000549606	305	11	0.0360656		0.348751	0.348751	845	13	0.0153846
GO:BP	negative regulation of transmembrane receptor protein serine/threonine kinase signaling pathway	GO:0090101	125	27543		0.000552638	0.000552638	1722	25	0.014518		1	1	181	4	0.0220994
GO:BP	negative regulation of apoptotic process	GO:0043066	1030	27543		0.000572969	0.000572969	1752	108	0.0616438		1	1	224	17	0.0758929
GO:BP	eye development	GO:0001654	419	27543		0.000575536	0.000575536	1689	54	0.0319716		0.1442	0.1442	819	28	0.034188
GO:BP	cartilage development	GO:0051216	204	27543		0.000603873	0.000603873	1746	34	0.0194731		1	1	828	13	0.0157005
GO:BP	pallium development	GO:0021543	190	27543		0.000620618	0.000620618	1704	32	0.0187793		1	1	834	15	0.0179856
GO:BP	regulation of AMPA receptor activity	GO:2000311	24	27543		0.00064901	0.00064901	798	8	0.0100251		0.0127284	0.0127284	306	5	0.0163399
GO:BP	organic anion transport	GO:0015711	379	27543		0.000658481	0.000658481	1729	51	0.0294968		1	1	791	21	0.0265487
GO:BP	regulation of the force of heart contraction	GO:0002026	29	27543		0.000682779	0.000682779	1558	11	0.00706033		1	1	796	2	0.00251256
GO:BP	positive regulation of cell adhesion	GO:0045785	461	27543		0.000706002	0.000706002	1752	59	0.0336758		1	1	878	25	0.0284738
GO:BP	positive regulation of protein localization to cell periphery	GO:1904377	68	27543		0.000707084	0.000707084	1416	16	0.0112994		1	1	809	5	0.00618047
GO:BP	positive regulation of calcium ion transmembrane transport	GO:1904427	101	27543		0.000712069	0.000712069	1736	22	0.0126728		0.170583	0.170583	865	12	0.0138728
GO:BP	visual system development	GO:0150063	422	27543		0.000725239	0.000725239	1689	54	0.0319716		0.0650108	0.0650108	819	29	0.035409
GO:BP	smooth muscle cell proliferation	GO:0048659	188	27543		0.000732918	0.000732918	1736	32	0.0184332		1	1	71	4	0.056338
GO:BP	phospholipid metabolic process	GO:0006644	372	27543		0.00075776	0.00075776	1419	44	0.0310078		1	1	26	1	0.0384615
GO:BP	regulation of cell-cell adhesion	GO:0022407	451	27543		0.000784795	0.000784795	1754	58	0.0330673		1	1	878	19	0.0216401
GO:BP	inner ear development	GO:0048839	209	27543		0.000789919	0.000789919	1722	34	0.0197445		1	1	809	14	0.0173053
GO:BP	circadian regulation of gene expression	GO:0032922	62	27543		0.000792826	0.000792826	1377	15	0.0108932		1	1	791	6	0.00758534
GO:BP	cellular response to nutrient levels	GO:0031669	234	27543		0.000808927	0.000808927	1459	33	0.0226182		1	1	495	8	0.0161616
GO:BP	response to radiation	GO:0009314	455	27543		0.000812687	0.000812687	1697	57	0.0335887		1	1	845	26	0.0307692
GO:BP	biomineralization	GO:0110148	172	27543		0.00084023	0.00084023	1722	30	0.0174216		1	1	12	2	0.166667
GO:BP	biomineral tissue development	GO:0031214	163	27543		0.000853617	0.000853617	1722	29	0.0168409		1	1	12	2	0.166667
GO:BP	negative regulation of protein depolymerization	GO:1901880	79	27543		0.000855058	0.000855058	1553	18	0.0115905		1	1	239	1	0.0041841
GO:BP	long-term synaptic potentiation	GO:0060291	246	27543		0.000861097	0.000861097	1389	33	0.0237581		1	1	36	3	0.0833333
GO:BP	behavioral response to cocaine	GO:0048148	18	27543		0.000865535	0.000865535	1665	9	0.00540541		1	1	791	4	0.00505689
GO:BP	regulation of small molecule metabolic process	GO:0062012	365	27543		0.000865751	0.000865751	1404	43	0.0306268		1	1	12	2	0.166667
GO:BP	muscle tissue morphogenesis	GO:0060415	82	27543		0.000869412	0.000869412	220	8	0.0363636		0.00633768	0.00633768	512	10	0.0195312
GO:BP	glycerophospholipid metabolic process	GO:0006650	288	27543		0.00087159	0.00087159	1419	37	0.0260747		1	1	26	1	0.0384615
GO:BP	striated muscle adaptation	GO:0014888	51	27543		0.000872278	0.000872278	361	8	0.0221607		1	1	796	6	0.00753769
GO:BP	embryo development ending in birth or egg hatching	GO:0009792	804	27543		0.000879187	0.000879187	1736	88	0.0506912		1	1	15	2	0.133333
GO:BP	negative regulation of protein kinase activity	GO:0006469	200	27543		0.000888014	0.000888014	1311	28	0.0213577		1	1	732	12	0.0163934
GO:BP	epithelial tube morphogenesis	GO:0060562	360	27543		0.000897851	0.000897851	1736	49	0.0282258		1	1	689	13	0.0188679
GO:BP	positive regulation of protein localization to plasma membrane	GO:1903078	61	27543		0.000900768	0.000900768	1416	15	0.0105932		1	1	809	5	0.00618047
GO:BP	regulation of sodium ion transport	GO:0002028	93	27543		0.000908079	0.000908079	1307	18	0.013772		0.16848	0.16848	796	11	0.0138191
GO:BP	behavioral fear response	GO:0001662	51	27543		0.000951725	0.000951725	1737	15	0.00863558		0.000397866	0.000397866	224	7	0.03125
GO:BP	positive regulation of synapse assembly	GO:0051965	75	27543		0.000969786	0.000969786	1658	18	0.0108565		0.00696846	0.00696846	706	11	0.0155807
GO:BP	multicellular organismal signaling	GO:0035637	148	27543		0.000997433	0.000997433	1485	25	0.016835		0.031968	0.031968	491	12	0.0244399
GO:BP	organ growth	GO:0035265	199	27543		0.0010199	0.0010199	1746	33	0.0189003		1	1	727	12	0.0165062
GO:BP	cyclic nucleotide metabolic process	GO:0009187	44	27543		0.00102665	0.00102665	791	10	0.0126422		1	1	856	5	0.00584112
GO:BP	retina development in camera-type eye	GO:0060041	177	27543		0.00105737	0.00105737	1689	30	0.017762		1	1	796	11	0.0138191
GO:BP	sensory system development	GO:0048880	427	27543		0.00105886	0.00105886	1689	54	0.0319716		0.0313506	0.0313506	819	30	0.03663
GO:BP	bone mineralization	GO:0030282	122	27543		0.00108482	0.00108482	1703	24	0.0140928		1	1	12	2	0.166667
GO:BP	sensory organ morphogenesis	GO:0090596	300	27543		0.00113158	0.00113158	1736	43	0.0247696		0.28932	0.28932	448	15	0.0334821
GO:BP	camera-type eye development	GO:0043010	362	27543		0.00116396	0.00116396	1689	48	0.0284192		0.0792339	0.0792339	819	26	0.031746
GO:BP	regulation of protein catabolic process	GO:0042176	393	27543		0.00117095	0.00117095	1649	50	0.0303214		1	1	60	3	0.05
GO:BP	negative regulation of cell growth	GO:0030308	201	27543		0.00117825	0.00117825	1569	31	0.0197578		1	1	831	15	0.0180505
GO:BP	positive regulation of lipid metabolic process	GO:0045834	190	27543		0.00119964	0.00119964	1404	28	0.019943		1	1	12	2	0.166667
GO:BP	membrane repolarization	GO:0086009	46	27543		0.00123235	0.00123235	1448	13	0.0089779		1	1	253	4	0.0158103
GO:BP	behavioral defense response	GO:0002209	52	27543		0.0012598	0.0012598	1737	15	0.00863558		0.000456598	0.000456598	224	7	0.03125
GO:BP	gamma-aminobutyric acid signaling pathway	GO:0007214	29	27543		0.00127381	0.00127381	1658	11	0.0066345		3.26e-08	3.26e-08	822	12	0.0145985
GO:BP	regeneration	GO:0031099	223	27543		0.0012861	0.0012861	1722	35	0.0203252		1	1	813	6	0.00738007
GO:BP	negative regulation of neuron projection development	GO:0010977	156	27543		0.00129237	0.00129237	1629	27	0.0165746		1	1	358	7	0.0195531
GO:BP	muscle cell migration	GO:0014812	115	27543		0.00130127	0.00130127	1697	23	0.0135533		1	1	7	1	0.142857
GO:BP	positive regulation of nucleobase-containing compound metabolic process	GO:0045935	2049	27543		0.00130364	0.00130364	1756	186	0.105923		1	1	183	23	0.125683
GO:BP	regulation of body fluid levels	GO:0050878	372	27543		0.00136506	0.00136506	1754	50	0.0285063		0.471415	0.471415	791	24	0.0303413
GO:BP	excitatory synapse assembly	GO:1904861	31	27543		0.00137513	0.00137513	1544	11	0.00712435		1	1	677	4	0.00590842
GO:BP	glial cell migration	GO:0008347	61	27543		0.00141353	0.00141353	1264	14	0.0110759		1	1	527	4	0.00759013
GO:BP	visual behavior	GO:0007632	69	27543		0.00144913	0.00144913	1665	17	0.0102102		0.196971	0.196971	291	6	0.0206186
GO:BP	regulation of cardiac muscle hypertrophy	GO:0010611	70	27543		0.00145863	0.00145863	1448	16	0.0110497		1	1	856	5	0.00584112
GO:BP	regulation of osteoblast differentiation	GO:0045667	149	27543		0.00147934	0.00147934	1722	27	0.0156794		1	1	872	10	0.0114679
GO:BP	regulation of smooth muscle cell migration	GO:0014910	91	27543		0.00148395	0.00148395	1697	20	0.0117855		1	1	7	1	0.142857
GO:BP	gamma-aminobutyric acid secretion	GO:0014051	17	27543		0.00149847	0.00149847	1352	8	0.00591716		0.959704	0.959704	247	3	0.0121457
GO:BP	neural precursor cell proliferation	GO:0061351	186	27543		0.00151451	0.00151451	1722	31	0.0180023		0.217392	0.217392	791	16	0.0202276
GO:BP	glycerolipid biosynthetic process	GO:0045017	224	27543		0.00153891	0.00153891	1419	31	0.0218464		1	1	11	1	0.0909091
GO:BP	vasculogenesis	GO:0001570	90	27543		0.00154691	0.00154691	1722	20	0.0116144		1	1	719	5	0.0069541
GO:BP	regulation of transforming growth factor beta receptor signaling pathway	GO:0017015	119	27543		0.00159027	0.00159027	1655	23	0.0138973		1	1	762	4	0.00524934
GO:BP	negative regulation of canonical Wnt signaling pathway	GO:0090090	132	27543		0.00163449	0.00163449	1722	25	0.014518		1	1	878	9	0.0102506
GO:BP	peptidyl-threonine modification	GO:0018210	127	27543		0.00165732	0.00165732	1311	21	0.0160183		1	1	482	5	0.0103734
GO:BP	regulation of long-term synaptic depression	GO:1900452	17	27543		0.00166634	0.00166634	1371	8	0.00583516		1	1	677	2	0.00295421
GO:BP	regulation of smooth muscle cell proliferation	GO:0048660	180	27543		0.00169193	0.00169193	1697	30	0.0176783		1	1	71	4	0.056338
GO:BP	negative regulation of neuron apoptotic process	GO:0043524	184	27543		0.0017181	0.0017181	1752	31	0.0176941		0.0382901	0.0382901	121	7	0.0578512
GO:BP	renal system development	GO:0072001	347	27543		0.00178666	0.00178666	1736	47	0.0270737		1	1	798	19	0.0238095
GO:BP	muscle organ morphogenesis	GO:0048644	90	27543		0.00179022	0.00179022	220	8	0.0363636		0.0148448	0.0148448	512	10	0.0195312
GO:BP	cardiac muscle cell contraction	GO:0086003	71	27543		0.00179162	0.00179162	1448	16	0.0110497		1	1	760	8	0.0105263
GO:BP	establishment of organelle localization	GO:0051656	413	27543		0.00187206	0.00187206	1733	53	0.0305828		1	1	720	20	0.0277778
GO:BP	regulation of transmembrane receptor protein serine/threonine kinase signaling pathway	GO:0090092	252	27543		0.00193412	0.00193412	1756	38	0.0216401		1	1	447	12	0.0268456
GO:BP	neural retina development	GO:0003407	85	27543		0.0020047	0.0020047	1689	19	0.0112493		1	1	796	7	0.00879397
GO:BP	positive regulation of growth	GO:0045927	304	27543		0.00201877	0.00201877	1750	43	0.0245714		0.107567	0.107567	19	4	0.210526
GO:BP	heart trabecula morphogenesis	GO:0061384	35	27543		0.00206196	0.00206196	1722	12	0.00696864		1	1	181	1	0.00552486
GO:BP	ERK1 and ERK2 cascade	GO:0070371	349	27543		0.00210937	0.00210937	1736	47	0.0270737		0.0244022	0.0244022	430	18	0.0418605
GO:BP	synaptic transmission, GABAergic	GO:0051932	58	27543		0.00213716	0.00213716	1383	14	0.0101229		2.29e-07	2.29e-07	822	15	0.0182482
GO:BP	positive regulation of potassium ion transport	GO:0043268	50	27543		0.00215145	0.00215145	1632	14	0.00857843		1	1	45	2	0.0444444
GO:BP	membrane depolarization	GO:0051899	90	27543		0.0022707	0.0022707	1289	17	0.0131885		1.91329e-06	1.91329e-06	499	14	0.0280561
GO:BP	musculoskeletal movement	GO:0050881	60	27543		0.00230714	0.00230714	1341	14	0.01044		1	1	668	6	0.00898204
GO:BP	multicellular organismal movement	GO:0050879	60	27543		0.00230714	0.00230714	1341	14	0.01044		1	1	668	6	0.00898204
GO:BP	carbohydrate metabolic process	GO:0005975	592	27543		0.00231185	0.00231185	1441	60	0.0416378		1	1	12	2	0.166667
GO:BP	neuroblast proliferation	GO:0007405	69	27543		0.00231453	0.00231453	1722	17	0.00987224		1	1	791	7	0.00884956
GO:BP	motor neuron axon guidance	GO:0008045	32	27543		0.00233205	0.00233205	1569	11	0.00701083		0.27367	0.27367	223	4	0.0179372
GO:BP	regulation of endocannabinoid signaling pathway	GO:2000124	3	27543		0.00233682	0.00233682	261	3	0.0114943		1	1	22	1	0.0454545
GO:BP	odontogenesis	GO:0042476	132	27543		0.00233946	0.00233946	1756	25	0.0142369		1	1	768	10	0.0130208
GO:BP	steroid hormone mediated signaling pathway	GO:0043401	128	27543		0.00234049	0.00234049	1689	24	0.0142096		1	1	352	6	0.0170455
GO:BP	peptidyl-tyrosine modification	GO:0018212	386	27543		0.00234083	0.00234083	1720	50	0.0290698		1	1	338	13	0.0384615
GO:BP	regulation of cardiac muscle cell proliferation	GO:0060043	48	27543		0.00235977	0.00235977	1722	14	0.00813008		1	1	181	1	0.00552486
GO:BP	retrograde trans-synaptic signaling	GO:0098917	14	27543		0.00236236	0.00236236	730	6	0.00821918		1	1	77	1	0.012987
GO:BP	retina morphogenesis in camera-type eye	GO:0060042	72	27543		0.00240515	0.00240515	1648	17	0.0103155		1	1	560	4	0.00714286
GO:BP	smooth muscle cell migration	GO:0014909	102	27543		0.00245814	0.00245814	1697	21	0.0123748		1	1	7	1	0.142857
GO:BP	positive regulation of signaling receptor activity	GO:2000273	46	27543		0.00247836	0.00247836	830	10	0.0120482		1	1	687	2	0.00291121
GO:BP	regulation of presynaptic cytosolic calcium ion concentration	GO:0099509	16	27543		0.00250599	0.00250599	1563	8	0.00511836		1	1	723	2	0.00276625
GO:BP	regulation of cellular response to transforming growth factor beta stimulus	GO:1903844	122	27543		0.00251584	0.00251584	1655	23	0.0138973		1	1	762	4	0.00524934
GO:BP	negative regulation of developmental growth	GO:0048640	119	27543		0.00251816	0.00251816	1569	22	0.0140217		0.101348	0.101348	805	13	0.0161491
GO:BP	chordate embryonic development	GO:0043009	788	27543		0.0025507	0.0025507	1736	85	0.0489631		1	1	15	2	0.133333
GO:BP	detection of mechanical stimulus involved in sensory perception of touch	GO:0050976	3	27543		0.00255923	0.00255923	269	3	0.0111524		1	1	418	1	0.00239234
GO:BP	negative regulation of kinase activity	GO:0033673	223	27543		0.00263539	0.00263539	1311	29	0.0221205		1	1	732	12	0.0163934
GO:BP	cell-matrix adhesion	GO:0007160	226	27543		0.00264609	0.00264609	1752	35	0.0199772		1	1	522	9	0.0172414
GO:BP	ear development	GO:0043583	238	27543		0.00267132	0.00267132	1736	36	0.0207373		1	1	448	11	0.0245536
GO:BP	phosphatidylinositol-mediated signaling	GO:0048015	163	27543		0.00268597	0.00268597	1416	25	0.0176554		1	1	822	10	0.0121654
GO:BP	positive regulation of canonical Wnt signaling pathway	GO:0090263	102	27543		0.00270575	0.00270575	1416	19	0.0134181		1	1	828	8	0.00966184
GO:BP	positive regulation of exocytosis	GO:0045921	101	27543		0.00272035	0.00272035	1155	17	0.0147186		0.0147893	0.0147893	794	13	0.0163728
GO:BP	positive regulation of AMPA receptor activity	GO:2000969	8	27543		0.00291691	0.00291691	798	5	0.00626566		1	1	281	1	0.00355872
GO:BP	protein-containing complex disassembly	GO:0032984	233	27543		0.0029375	0.0029375	1553	33	0.0212492		1	1	18	1	0.0555556
GO:BP	organic acid transport	GO:0015849	337	27543		0.00295638	0.00295638	1486	41	0.0275908		1	1	274	10	0.0364963
GO:BP	G protein-coupled acetylcholine receptor signaling pathway	GO:0007213	14	27543		0.00296184	0.00296184	1260	7	0.00555556		7.04237e-05	7.04237e-05	419	6	0.0143198
GO:BP	kidney epithelium development	GO:0072073	153	27543		0.00297255	0.00297255	1736	27	0.015553		1	1	798	11	0.0137845
GO:BP	epithelial cell differentiation	GO:0030855	723	27543		0.00299243	0.00299243	1755	80	0.045584		1	1	809	30	0.0370828
GO:BP	positive regulation of calcium ion transmembrane transporter activity	GO:1901021	42	27543		0.00300255	0.00300255	1448	12	0.00828729		1	1	350	4	0.0114286
GO:BP	regulation of epithelial cell migration	GO:0010632	228	27543		0.00301846	0.00301846	1746	35	0.0200458		1	1	384	9	0.0234375
GO:BP	sleep	GO:0030431	41	27543		0.00302968	0.00302968	229	6	0.0262009		1	1	791	5	0.00632111
GO:BP	regulation of dephosphorylation	GO:0035303	131	27543		0.00305739	0.00305739	1673	24	0.0143455		1	1	791	5	0.00632111
GO:BP	reflex	GO:0060004	25	27543		0.00314431	0.00314431	1708	10	0.0058548		0.0575945	0.0575945	681	6	0.00881057
GO:BP	muscle hypertrophy in response to stress	GO:0003299	27	27543		0.00316918	0.00316918	361	6	0.0166205		1	1	796	4	0.00502513
GO:BP	cardiac muscle hypertrophy in response to stress	GO:0014898	27	27543		0.00316918	0.00316918	361	6	0.0166205		1	1	796	4	0.00502513
GO:BP	receptor-mediated endocytosis	GO:0006898	252	27543		0.00318286	0.00318286	1720	37	0.0215116		1	1	634	11	0.0173502
GO:BP	regulation of axon extension	GO:0030516	106	27543		0.00328435	0.00328435	1658	21	0.0126659		1	1	811	9	0.0110974
GO:BP	protein catabolic process	GO:0030163	981	27543		0.00328491	0.00328491	1752	101	0.0576484		1	1	12	2	0.166667
GO:BP	negative regulation of muscle contraction	GO:0045932	28	27543		0.00329896	0.00329896	1142	9	0.00788091		1	1	736	3	0.00407609
GO:BP	chondrocyte differentiation	GO:0002062	112	27543		0.0033529	0.0033529	1703	22	0.0129184		1	1	828	8	0.00966184
GO:BP	reproductive system development	GO:0061458	516	27543		0.0034206	0.0034206	1756	62	0.0353075		1	1	828	29	0.0350242
GO:BP	carboxylic acid transport	GO:0046942	307	27543		0.00349977	0.00349977	1467	38	0.0259032		1	1	727	17	0.0233838
GO:BP	cellular response to peptide	GO:1901653	367	27543		0.00356527	0.00356527	1473	43	0.0291921		1	1	56	3	0.0535714
GO:BP	protein autophosphorylation	GO:0046777	238	27543		0.00366382	0.00366382	1246	29	0.0232745		1	1	22	2	0.0909091
GO:BP	cellular glucose homeostasis	GO:0001678	192	27543		0.00368252	0.00368252	1737	31	0.0178469		1	1	382	6	0.0157068
GO:BP	regulation of protein kinase B signaling	GO:0051896	181	27543		0.00377559	0.00377559	1754	30	0.0171038		1	1	11	2	0.181818
GO:BP	inositol lipid-mediated signaling	GO:0048017	166	27543		0.00379195	0.00379195	1416	25	0.0176554		1	1	822	10	0.0121654
GO:BP	acetylcholine receptor signaling pathway	GO:0095500	33	27543		0.00379735	0.00379735	1260	10	0.00793651		2.43123e-06	2.43123e-06	419	9	0.0214797
GO:BP	NMDA selective glutamate receptor signaling pathway	GO:0098989	2	27543		0.00386683	0.00386683	33	2	0.0606061		0.0245192	0.0245192	93	2	0.0215054
GO:BP	visual learning	GO:0008542	66	27543		0.00393427	0.00393427	1665	16	0.00960961		0.153294	0.153294	291	6	0.0206186
GO:BP	regulation of cellular biosynthetic process	GO:0031326	4136	27543		0.00397886	0.00397886	1756	334	0.190205		1	1	22	8	0.363636
GO:BP	cardiac muscle adaptation	GO:0014887	28	27543		0.00398913	0.00398913	361	6	0.0166205		1	1	796	4	0.00502513
GO:BP	kidney development	GO:0001822	336	27543		0.00418588	0.00418588	1736	45	0.0259217		1	1	798	18	0.0225564
GO:BP	nephron epithelium development	GO:0072009	120	27543		0.00421208	0.00421208	1736	23	0.0132488		1	1	798	9	0.0112782
GO:BP	regulation of sodium ion transmembrane transporter activity	GO:2000649	53	27543		0.00427469	0.00427469	1620	14	0.00864197		0.764161	0.764161	491	6	0.01222
GO:BP	peptidyl-tyrosine phosphorylation	GO:0018108	383	27543		0.00430399	0.00430399	1720	49	0.0284884		1	1	338	13	0.0384615
GO:BP	tissue homeostasis	GO:0001894	271	27543		0.00433918	0.00433918	1752	39	0.0222603		1	1	715	15	0.020979
GO:BP	epinephrine secretion	GO:0048242	8	27543		0.004345	0.004345	1737	6	0.00345423		0.0491406	0.0491406	671	4	0.00596125
GO:BP	maintenance of location in cell	GO:0051651	233	27543		0.00442551	0.00442551	1736	35	0.0201613		1	1	865	13	0.0150289
GO:BP	negative regulation of amine transport	GO:0051953	37	27543		0.00446071	0.00446071	1737	12	0.00690846		9.61695e-06	9.61695e-06	791	11	0.0139064
GO:BP	regulation of organ growth	GO:0046620	113	27543		0.00448092	0.00448092	1579	21	0.0132996		1	1	11	1	0.0909091
GO:BP	regulation of protein dephosphorylation	GO:0035304	92	27543		0.00451901	0.00451901	1478	18	0.0121786		1	1	791	4	0.00505689
GO:BP	negative regulation of gamma-aminobutyric acid secretion	GO:0014053	6	27543		0.00452423	0.00452423	1352	5	0.00369822		0.0303669	0.0303669	247	3	0.0121457
GO:BP	regulation of development, heterochronic	GO:0040034	14	27543		0.00470715	0.00470715	1350	7	0.00518519		1	1	766	2	0.00261097
GO:BP	negative regulation of cellular protein metabolic process	GO:0032269	1057	27543		0.00471523	0.00471523	1311	85	0.064836		1	1	13	3	0.230769
GO:BP	regulation of ERK1 and ERK2 cascade	GO:0070372	327	27543		0.00480214	0.00480214	1736	44	0.0253456		0.0363846	0.0363846	519	19	0.0366089
GO:BP	skeletal muscle tissue development	GO:0007519	196	27543		0.00482038	0.00482038	1722	31	0.0180023		1	1	11	1	0.0909091
GO:BP	regulation of calcium ion-dependent exocytosis	GO:0017158	43	27543		0.00483517	0.00483517	1208	11	0.00910596		0.000441127	0.000441127	760	10	0.0131579
GO:BP	organic substance catabolic process	GO:1901575	2069	27543		0.00486738	0.00486738	1616	172	0.106436		1	1	12	3	0.25
GO:BP	peptidyl-tyrosine dephosphorylation	GO:0035335	93	27543		0.00489185	0.00489185	1627	19	0.0116779		1	1	732	4	0.00546448
GO:BP	cellular response to high light intensity	GO:0071486	3	27543		0.00504342	0.00504342	337	3	0.00890208		1	1	104	1	0.00961539
GO:BP	negative regulation of cytoskeleton organization	GO:0051494	173	27543		0.00507203	0.00507203	1569	27	0.0172084		1	1	402	4	0.00995025
GO:BP	calmodulin dependent kinase signaling pathway	GO:0099004	12	27543		0.00514138	0.00514138	531	5	0.0094162		0.0869598	0.0869598	22	2	0.0909091
GO:BP	reproductive structure development	GO:0048608	511	27543		0.00515371	0.00515371	1756	61	0.034738		1	1	828	29	0.0350242
GO:BP	cellular response to acetylcholine	GO:1905145	34	27543		0.00515934	0.00515934	1260	10	0.00793651		3.26227e-06	3.26227e-06	419	9	0.0214797
GO:BP	regulation of biosynthetic process	GO:0009889	4220	27543		0.00527482	0.00527482	1756	339	0.193052		1	1	22	8	0.363636
GO:BP	skeletal muscle organ development	GO:0060538	207	27543		0.00549398	0.00549398	1722	32	0.018583		1	1	11	1	0.0909091
GO:BP	central nervous system neuron axonogenesis	GO:0021955	40	27543		0.00597532	0.00597532	1634	12	0.00734394		1	1	319	3	0.00940439
GO:BP	positive regulation of calcium ion-dependent exocytosis	GO:0045956	18	27543		0.00602586	0.00602586	636	6	0.00943396		1	1	760	4	0.00526316
GO:BP	ovulation cycle	GO:0042698	88	27543		0.00625983	0.00625983	1756	19	0.01082		1	1	442	7	0.0158371
GO:BP	cranial nerve development	GO:0021545	51	27543		0.00636199	0.00636199	1749	14	0.00800457		1	1	412	4	0.00970874
GO:BP	contractile actin filament bundle assembly	GO:0030038	114	27543		0.00649009	0.00649009	1335	19	0.0142322		0.0426815	0.0426815	79	5	0.0632911
GO:BP	stress fiber assembly	GO:0043149	114	27543		0.00649009	0.00649009	1335	19	0.0142322		0.0426815	0.0426815	79	5	0.0632911
GO:BP	regulation of transcription by RNA polymerase II	GO:0006357	2494	27543		0.00657927	0.00657927	1756	215	0.122437		1	1	186	27	0.145161
GO:BP	positive regulation of protein serine/threonine kinase activity	GO:0071902	225	27543		0.006616	0.006616	1752	34	0.0194064		1	1	12	1	0.0833333
GO:BP	regulation of postsynaptic specialization assembly	GO:0099150	18	27543		0.00701737	0.00701737	1544	8	0.00518135		1	1	677	2	0.00295421
GO:BP	hindbrain morphogenesis	GO:0021575	54	27543		0.00721627	0.00721627	1192	12	0.0100671		1	1	766	4	0.00522193
GO:BP	regulation of bone mineralization	GO:0030500	82	27543		0.00728035	0.00728035	204	7	0.0343137		1	1	12	1	0.0833333
GO:BP	negative regulation of transferase activity	GO:0051348	260	27543		0.0073669	0.0073669	1311	31	0.0236461		1	1	828	15	0.0181159
GO:BP	glycerophospholipid biosynthetic process	GO:0046474	183	27543		0.00749288	0.00749288	1419	26	0.0183228		1	1	413	4	0.00968523
GO:BP	neurotransmitter-gated ion channel clustering	GO:0072578	21	27543		0.00749924	0.00749924	1292	8	0.00619195		1	1	214	3	0.0140187
GO:BP	epithelial to mesenchymal transition	GO:0001837	151	27543		0.00751739	0.00751739	1736	26	0.014977		1	1	11	1	0.0909091
GO:BP	regulation of sequestering of calcium ion	GO:0051282	133	27543		0.00770595	0.00770595	1736	24	0.0138249		1	1	865	11	0.0127168
GO:BP	response to nicotine	GO:0035094	58	27543		0.00800401	0.00800401	1324	13	0.00981873		0.201968	0.201968	508	7	0.0137795
GO:BP	nephron development	GO:0072006	161	27543		0.00820826	0.00820826	1736	27	0.015553		1	1	798	10	0.0125313
GO:BP	actin polymerization or depolymerization	GO:0008154	200	27543		0.00822224	0.00822224	1642	30	0.0182704		1	1	12	1	0.0833333
GO:BP	vascular associated smooth muscle contraction	GO:0014829	27	27543		0.00829972	0.00829972	978	8	0.00817996		1	1	222	3	0.0135135
GO:BP	carbohydrate catabolic process	GO:0016052	149	27543		0.00831987	0.00831987	1438	23	0.0159944		1	1	625	5	0.008
GO:BP	cerebral cortex cell migration	GO:0021795	50	27543		0.00859788	0.00859788	1569	13	0.00828553		1	1	527	4	0.00759013
GO:BP	embryonic organ development	GO:0048568	502	27543		0.00867573	0.00867573	1736	59	0.0339862		1	1	200	9	0.045
GO:BP	regulation of actin filament-based movement	GO:1903115	46	27543		0.00868927	0.00868927	1448	12	0.00828729		1	1	736	5	0.00679348
GO:BP	cardiac ventricle development	GO:0003231	143	27543		0.0087497	0.0087497	1736	25	0.0144009		0.856634	0.856634	828	13	0.0157005
GO:BP	intracellular protein transport	GO:0006886	852	27543		0.00879337	0.00879337	970	57	0.0587629		1	1	755	31	0.0410596
GO:BP	regulation of cardiac muscle cell contraction	GO:0086004	39	27543		0.0088302	0.0088302	1746	12	0.00687285		1	1	197	2	0.0101523
GO:BP	positive regulation of lipid biosynthetic process	GO:0046889	101	27543		0.00891611	0.00891611	1404	18	0.0128205		1	1	11	1	0.0909091
GO:BP	regulation of smooth muscle contraction	GO:0006940	65	27543		0.00924605	0.00924605	1383	14	0.0101229		0.000254242	0.000254242	727	12	0.0165062
GO:BP	regulation of sodium ion transmembrane transport	GO:1902305	64	27543		0.00939066	0.00939066	1620	15	0.00925926		1	1	491	6	0.01222
GO:BP	regulation of epithelial to mesenchymal transition	GO:0010717	92	27543		0.00947807	0.00947807	1722	19	0.0110337		1	1	11	1	0.0909091
GO:BP	central nervous system neuron development	GO:0021954	88	27543		0.00948107	0.00948107	1634	18	0.0110159		1	1	445	6	0.0134831
GO:BP	positive regulation of dendrite morphogenesis	GO:0050775	54	27543		0.00956073	0.00956073	1225	12	0.00979592		1	1	790	4	0.00506329
GO:BP	ventricular cardiac muscle tissue morphogenesis	GO:0055010	53	27543		0.00962163	0.00962163	1736	14	0.00806452		0.715801	0.715801	485	6	0.0123711
GO:BP	dicarboxylic acid transport	GO:0006835	94	27543		0.00974667	0.00974667	1370	17	0.0124088		1	1	247	5	0.0202429
GO:BP	insulin secretion	GO:0030073	227	27543		0.00987197	0.00987197	1009	24	0.0237859		0.818847	0.818847	801	17	0.0212235
GO:BP	urogenital system development	GO:0001655	391	27543		0.0100312	0.0100312	1736	49	0.0282258		1	1	798	23	0.0288221
GO:BP	negative regulation of cell adhesion	GO:0007162	301	27543		0.0100879	0.0100879	1754	41	0.0233751		1	1	840	12	0.0142857
GO:BP	sequestering of calcium ion	GO:0051208	135	27543		0.010108	0.010108	1736	24	0.0138249		1	1	865	11	0.0127168
GO:BP	retina layer formation	GO:0010842	23	27543		0.0101406	0.0101406	1648	9	0.00546116		1	1	362	1	0.00276243
GO:BP	regulation of MAP kinase activity	GO:0043405	190	27543		0.0102949	0.0102949	1752	30	0.0171233		1	1	828	11	0.013285
GO:BP	central nervous system projection neuron axonogenesis	GO:0021952	29	27543		0.0103201	0.0103201	1634	10	0.00611995		1	1	319	3	0.00940439
GO:BP	photoperiodism	GO:0009648	31	27543		0.0104906	0.0104906	1170	9	0.00769231		1	1	745	3	0.00402685
GO:BP	inflammatory response	GO:0006954	745	27543		0.0108518	0.0108518	1064	55	0.0516917		1	1	355	21	0.0591549
GO:BP	glycoprotein metabolic process	GO:0009100	360	27543		0.0110298	0.0110298	1732	46	0.0265589		0.404804	0.404804	860	25	0.0290698
GO:BP	synaptic vesicle maturation	GO:0016188	12	27543		0.0110831	0.0110831	1155	6	0.00519481		1	1	551	1	0.00181488
GO:BP	axon extension	GO:0048675	136	27543		0.0115491	0.0115491	1736	24	0.0138249		1	1	811	10	0.0123305
GO:BP	phosphatidylinositol metabolic process	GO:0046488	154	27543		0.0118319	0.0118319	1419	23	0.0162086		1	1	26	1	0.0384615
GO:BP	skeletal muscle fiber development	GO:0048741	39	27543		0.0119835	0.0119835	1480	11	0.00743243		1	1	186	1	0.00537634
GO:BP	response to acetylcholine	GO:1905144	37	27543		0.0120912	0.0120912	1260	10	0.00793651		7.43136e-06	7.43136e-06	419	9	0.0214797
GO:BP	hemopoiesis	GO:0030097	970	27543		0.0122476	0.0122476	1266	76	0.0600316		1	1	158	11	0.0696203
GO:BP	cerebral cortex radially oriented cell migration	GO:0021799	37	27543		0.0124361	0.0124361	1264	10	0.00791139		1	1	834	5	0.0059952
GO:BP	negative regulation of organelle organization	GO:0010639	360	27543		0.0126383	0.0126383	1579	43	0.0272324		1	1	402	5	0.0124378
GO:BP	potassium ion import across plasma membrane	GO:1990573	43	27543		0.0132126	0.0132126	1626	12	0.00738007		1	1	556	3	0.00539568
GO:BP	regulation of cellular response to stress	GO:0080135	661	27543		0.0137443	0.0137443	1710	71	0.0415205		1	1	15	2	0.133333
GO:BP	regulation of cellular response to insulin stimulus	GO:1900076	72	27543		0.0140024	0.0140024	1473	15	0.0101833		1	1	867	2	0.0023068
GO:BP	cellular response to calcium ion	GO:0071277	83	27543		0.0147139	0.0147139	541	10	0.0184843		0.000489963	0.000489963	85	6	0.0705882
GO:BP	positive regulation of smooth muscle cell proliferation	GO:0048661	108	27543		0.0147234	0.0147234	1496	19	0.0127005		1	1	57	2	0.0350877
GO:BP	cytoskeleton-dependent intracellular transport	GO:0030705	183	27543		0.0147638	0.0147638	1662	28	0.0168472		1	1	835	10	0.011976
GO:BP	peripheral nervous system development	GO:0007422	73	27543		0.0153826	0.0153826	1658	16	0.00965018		0.194528	0.194528	88	4	0.0454545
GO:BP	negative regulation of protein dephosphorylation	GO:0035308	33	27543		0.0158577	0.0158577	1478	10	0.0067659		1	1	733	2	0.00272851
GO:BP	negative regulation of supramolecular fiber organization	GO:1902904	173	27543		0.0158965	0.0158965	1569	26	0.0165711		1	1	850	8	0.00941177
GO:BP	response to corticosteroid	GO:0031960	195	27543		0.0164445	0.0164445	1746	30	0.0171821		1	1	768	10	0.0130208
GO:BP	inorganic anion transport	GO:0015698	185	27543		0.0166777	0.0166777	1467	26	0.0177232		1	1	771	13	0.0168612
GO:BP	Notch signaling pathway	GO:0007219	178	27543		0.016679	0.016679	1722	28	0.0162602		1	1	719	10	0.0139082
GO:BP	neuronal signal transduction	GO:0023041	5	27543		0.0168208	0.0168208	235	3	0.012766		1	1	506	1	0.00197628
GO:BP	glycoprotein biosynthetic process	GO:0009101	306	27543		0.0170496	0.0170496	1637	39	0.0238241		1	1	860	21	0.0244186
GO:BP	response to amphetamine	GO:0001975	35	27543		0.0170854	0.0170854	1736	11	0.00633641		1	1	791	4	0.00505689
GO:BP	release of sequestered calcium ion into cytosol	GO:0051209	130	27543		0.0173865	0.0173865	1736	23	0.0132488		1	1	865	11	0.0127168
GO:BP	regulation of organic acid transport	GO:0032890	83	27543		0.0175458	0.0175458	1459	16	0.0109664		0.0423029	0.0423029	274	7	0.0255474
GO:BP	ventricular cardiac muscle tissue development	GO:0003229	63	27543		0.0176637	0.0176637	1736	15	0.00864055		1	1	485	6	0.0123711
GO:BP	parasympathetic nervous system development	GO:0048486	18	27543		0.0177868	0.0177868	1749	8	0.00457404		1	1	223	1	0.00448431
GO:BP	regulation of NMDA receptor activity	GO:2000310	29	27543		0.0178014	0.0178014	1737	10	0.00575705		0.0051698	0.0051698	90	4	0.0444444
GO:BP	positive regulation of cytosolic calcium ion concentration	GO:0007204	235	27543		0.0179859	0.0179859	1754	34	0.0193843		0.000771767	0.000771767	791	23	0.0290771
GO:BP	negative regulation of organic acid transport	GO:0032891	29	27543		0.0183572	0.0183572	1352	9	0.00665681		0.000781896	0.000781896	274	6	0.0218978
GO:BP	positive regulation of Wnt signaling pathway	GO:0030177	134	27543		0.0187324	0.0187324	1689	23	0.0136175		1	1	828	9	0.0108696
GO:BP	response to oxygen levels	GO:0070482	418	27543		0.0187352	0.0187352	1755	51	0.0290598		1	1	60	3	0.05
GO:BP	hematopoietic or lymphoid organ development	GO:0048534	1016	27543		0.0192236	0.0192236	1266	78	0.0616114		1	1	158	12	0.0759494
GO:BP	in utero embryonic development	GO:0001701	515	27543		0.0192375	0.0192375	1736	59	0.0339862		1	1	15	2	0.133333
GO:BP	Rho protein signal transduction	GO:0007266	129	27543		0.0192424	0.0192424	1507	21	0.013935		1	1	594	10	0.016835
GO:BP	actin filament depolymerization	GO:0030042	62	27543		0.0194412	0.0194412	1553	14	0.00901481		1	1	239	1	0.0041841
GO:BP	positive regulation of amine transport	GO:0051954	47	27543		0.0195209	0.0195209	1530	12	0.00784314		0.00374351	0.00374351	494	8	0.0161943
GO:BP	startle response	GO:0001964	33	27543		0.0195675	0.0195675	617	7	0.0113452		0.683062	0.683062	791	6	0.00758534
GO:BP	blood vessel endothelial cell migration	GO:0043534	112	27543		0.01958	0.01958	1752	21	0.0119863		1	1	157	3	0.0191083
GO:BP	negative regulation of sequestering of calcium ion	GO:0051283	131	27543		0.0198462	0.0198462	1736	23	0.0132488		1	1	865	11	0.0127168
GO:BP	actin filament-based transport	GO:0099515	19	27543		0.0199058	0.0199058	1662	8	0.00481348		1	1	50	1	0.02
GO:BP	response to high light intensity	GO:0009644	4	27543		0.0199902	0.0199902	337	3	0.00890208		1	1	104	1	0.00961539
GO:BP	regulation of response to external stimulus	GO:0032101	946	27543		0.0200895	0.0200895	1754	95	0.0541619		0.658818	0.658818	358	26	0.0726257
GO:BP	anion transmembrane transport	GO:0098656	258	27543		0.0201334	0.0201334	1459	32	0.0219328		1	1	771	17	0.0220493
GO:BP	epithelial cell proliferation	GO:0050673	458	27543		0.020371	0.020371	1736	54	0.031106		1	1	447	16	0.0357942
GO:BP	membrane organization	GO:0061024	868	27543		0.0204682	0.0204682	1121	63	0.0561998		1	1	103	8	0.0776699
GO:BP	detection of mechanical stimulus involved in sensory perception	GO:0050974	43	27543		0.0206696	0.0206696	304	6	0.0197368		1	1	766	6	0.0078329
GO:BP	temperature homeostasis	GO:0001659	180	27543		0.0207414	0.0207414	1722	28	0.0162602		1	1	822	5	0.00608272
GO:BP	regulation of biomineral tissue development	GO:0070167	96	27543		0.0209151	0.0209151	204	7	0.0343137		1	1	12	1	0.0833333
GO:BP	postsynaptic cytoskeleton organization	GO:0099188	22	27543		0.0212164	0.0212164	1407	8	0.00568586		1	1	736	2	0.00271739
GO:BP	stress-activated protein kinase signaling cascade	GO:0031098	245	27543		0.0212222	0.0212222	1693	34	0.0200827		1	1	15	2	0.133333
GO:BP	regulation of cartilage development	GO:0061035	73	27543		0.0215834	0.0215834	1703	16	0.00939519		1	1	238	3	0.012605
GO:BP	regulation of cell projection assembly	GO:0060491	207	27543		0.0220209	0.0220209	1579	29	0.0183661		1	1	736	8	0.0108696
GO:BP	hormone biosynthetic process	GO:0042446	67	27543		0.0222874	0.0222874	1655	15	0.00906344		1	1	149	1	0.00671141
GO:BP	stress-activated MAPK cascade	GO:0051403	235	27543		0.0222951	0.0222951	1693	33	0.019492		1	1	15	2	0.133333
GO:BP	regulation of inflammatory response	GO:0050727	333	27543		0.0228176	0.0228176	1752	43	0.0245434		1	1	345	12	0.0347826
GO:BP	gamma-aminobutyric acid transport	GO:0015812	23	27543		0.0232013	0.0232013	1352	8	0.00591716		0.140889	0.140889	529	5	0.0094518
GO:BP	glutamate secretion	GO:0014047	31	27543		0.0233047	0.0233047	1658	10	0.00603136		0.0170041	0.0170041	247	5	0.0202429
GO:BP	regulation of postsynaptic cytosolic calcium ion concentration	GO:0099566	12	27543		0.0233385	0.0233385	1314	6	0.00456621		1	1	31	1	0.0322581
GO:BP	regulation of phosphatase activity	GO:0010921	83	27543		0.0235566	0.0235566	1673	17	0.0101614		1	1	791	3	0.00379267
GO:BP	regulation of biomineralization	GO:0110149	98	27543		0.0239749	0.0239749	204	7	0.0343137		1	1	681	6	0.00881057
GO:BP	regulation of amino acid transport	GO:0051955	50	27543		0.0240788	0.0240788	1459	12	0.00822481		0.0121528	0.0121528	247	6	0.0242915
GO:BP	eye morphogenesis	GO:0048592	178	27543		0.0243254	0.0243254	1658	27	0.0162847		1	1	560	9	0.0160714
GO:BP	regulation of receptor clustering	GO:1903909	20	27543		0.0245286	0.0245286	1121	7	0.00624442		1	1	872	3	0.00344037
GO:BP	cellular response to retinoic acid	GO:0071300	61	27543		0.0249979	0.0249979	1616	14	0.00866337		1	1	12	1	0.0833333
GO:BP	sensory perception of touch	GO:0050975	5	27543		0.025223	0.025223	269	3	0.0111524		1	1	418	1	0.00239234
GO:BP	positive regulation of epithelial cell proliferation	GO:0050679	212	27543		0.0253308	0.0253308	1722	31	0.0180023		1	1	446	11	0.0246637
GO:BP	cellular response to insulin stimulus	GO:0032869	223	27543		0.0254613	0.0254613	1473	29	0.0196877		1	1	227	2	0.00881057
GO:BP	modification of postsynaptic structure	GO:0099010	24	27543		0.0255306	0.0255306	47	3	0.0638298		0.15575	0.15575	93	3	0.0322581
GO:BP	cerebellum morphogenesis	GO:0021587	51	27543		0.0255951	0.0255951	1192	11	0.00922819		1	1	766	4	0.00522193
GO:BP	cardiac ventricle morphogenesis	GO:0003208	78	27543		0.0258496	0.0258496	171	6	0.0350877		0.0457721	0.0457721	828	11	0.013285
GO:BP	positive regulation of dendritic spine development	GO:0060999	61	27543		0.0259384	0.0259384	798	10	0.0125313		1	1	790	4	0.00506329
GO:BP	regulation of Rho protein signal transduction	GO:0035023	83	27543		0.0263439	0.0263439	1507	16	0.0106171		1	1	519	5	0.00963391
GO:BP	camera-type eye morphogenesis	GO:0048593	140	27543		0.0265823	0.0265823	1648	23	0.0139563		1	1	560	8	0.0142857
GO:BP	peptidyl-serine dephosphorylation	GO:0070262	16	27543		0.026744	0.026744	946	6	0.0063425		1	1	481	2	0.004158
GO:BP	cell cycle	GO:0007049	1767	27543		0.0271771	0.0271771	1510	139	0.092053		1	1	201	17	0.0845771
GO:BP	response to carbohydrate	GO:0009743	270	27543		0.027364	0.027364	1280	30	0.0234375		1	1	12	2	0.166667
GO:BP	regulation of gamma-aminobutyric acid secretion	GO:0014052	12	27543		0.027498	0.027498	1352	6	0.00443787		0.320968	0.320968	247	3	0.0121457
GO:BP	locomotory exploration behavior	GO:0035641	19	27543		0.0275745	0.0275745	1737	8	0.00460564		1	1	671	1	0.00149031
GO:BP	spontaneous neurotransmitter secretion	GO:0061669	9	27543		0.0276075	0.0276075	471	4	0.00849257		1	1	35	1	0.0285714
GO:BP	regulation of postsynaptic neurotransmitter receptor activity	GO:0098962	21	27543		0.0280468	0.0280468	1544	8	0.00518135		1.35111e-05	1.35111e-05	584	8	0.0136986
GO:BP	membrane depolarization during action potential	GO:0086010	28	27543		0.0283334	0.0283334	1485	9	0.00606061		4.75958e-05	4.75958e-05	491	8	0.0162933
GO:BP	small molecule biosynthetic process	GO:0044283	559	27543		0.0289535	0.0289535	1731	62	0.0358174		1	1	12	2	0.166667
GO:BP	cellular response to carbohydrate stimulus	GO:0071322	184	27543		0.0290117	0.0290117	1246	23	0.0184591		1	1	11	1	0.0909091
GO:BP	regulation of endothelial cell migration	GO:0010594	171	27543		0.0290135	0.0290135	1746	27	0.0154639		1	1	362	6	0.0165746
GO:BP	cerebellar cortex development	GO:0021695	65	27543		0.0291032	0.0291032	1749	15	0.00857633		1	1	766	5	0.00652741
GO:BP	branching morphogenesis of an epithelial tube	GO:0048754	172	27543		0.0291991	0.0291991	1736	27	0.015553		1	1	689	7	0.0101597
GO:BP	regulation of actin filament bundle assembly	GO:0032231	113	27543		0.0300782	0.0300782	738	13	0.0176152		0.692181	0.692181	79	4	0.0506329
GO:BP	regulation of presynaptic membrane potential	GO:0099505	10	27543		0.0304369	0.0304369	126	3	0.0238095		1	1	45	1	0.0222222
GO:BP	neuron recognition	GO:0008038	45	27543		0.0310842	0.0310842	1681	12	0.00713861		1	1	665	4	0.00601504
GO:BP	secretion by tissue	GO:0032941	49	27543		0.0310884	0.0310884	1530	12	0.00784314		0.0958573	0.0958573	739	8	0.0108254
GO:BP	cerebellar cortex morphogenesis	GO:0021696	43	27543		0.0320492	0.0320492	1192	10	0.00838926		1	1	766	4	0.00522193
GO:BP	regulation of receptor localization to synapse	GO:1902683	25	27543		0.0321273	0.0321273	588	6	0.0102041		0.176556	0.176556	93	3	0.0322581
GO:BP	response to amine	GO:0014075	51	27543		0.0327344	0.0327344	1736	13	0.00748848		1	1	791	5	0.00632111
GO:BP	regulation of vascular associated smooth muscle contraction	GO:0003056	10	27543		0.0337023	0.0337023	978	5	0.00511247		1	1	89	1	0.011236
GO:BP	odontogenesis of dentin-containing tooth	GO:0042475	95	27543		0.0348732	0.0348732	1655	18	0.0108761		1	1	104	3	0.0288462
GO:BP	regulation of synaptic transmission, GABAergic	GO:0032228	39	27543		0.0352971	0.0352971	1658	11	0.0066345		0.00370701	0.00370701	822	9	0.0109489
GO:BP	organonitrogen compound catabolic process	GO:1901565	1296	27543		0.0353007	0.0353007	1732	120	0.0692841		1	1	12	3	0.25
GO:BP	positive regulation of regulated secretory pathway	GO:1903307	66	27543		0.0355578	0.0355578	936	11	0.0117521		0.174456	0.174456	760	9	0.0118421
GO:BP	catabolic process	GO:0009056	2454	27543		0.0359595	0.0359595	1732	205	0.11836		1	1	12	3	0.25
GO:BP	regulation of skeletal muscle adaptation	GO:0014733	12	27543		0.0367258	0.0367258	361	4	0.0110803		1	1	7	1	0.142857
GO:BP	regulation of neurotransmitter receptor localization to postsynaptic specialization membrane	GO:0098696	16	27543		0.0373406	0.0373406	1003	6	0.00598205		1	1	93	2	0.0215054
GO:BP	positive regulation of bone mineralization	GO:0030501	42	27543		0.0373614	0.0373614	201	5	0.0248756		1	1	133	1	0.0075188
GO:BP	transcription by RNA polymerase II	GO:0006366	2560	27543		0.0374957	0.0374957	1756	215	0.122437		1	1	186	27	0.145161
GO:BP	response to temperature stimulus	GO:0009266	190	27543		0.0379962	0.0379962	970	20	0.0206186		1	1	521	10	0.0191939
GO:BP	small molecule metabolic process	GO:0044281	1778	27543		0.0397129	0.0397129	1382	129	0.093343		1	1	801	70	0.0873908
GO:BP	regulation of transcription, DNA-templated	GO:0006355	3474	27543		0.0399953	0.0399953	1756	280	0.159453		1	1	186	32	0.172043
GO:BP	positive regulation of protein kinase B signaling	GO:0051897	126	27543		0.0400264	0.0400264	1754	22	0.0125428		1	1	11	2	0.181818
GO:BP	regulation of nucleic acid-templated transcription	GO:1903506	3475	27543		0.0408714	0.0408714	1756	280	0.159453		1	1	186	32	0.172043
GO:BP	regulation of catabolic process	GO:0009894	936	27543		0.041209	0.041209	1428	79	0.0553221		1	1	32	2	0.0625
GO:BP	regulation of insulin secretion	GO:0050796	184	27543		0.0416497	0.0416497	1009	20	0.0198216		1	1	801	11	0.0137328
GO:BP	negative regulation of astrocyte differentiation	GO:0048712	18	27543		0.0417584	0.0417584	1377	7	0.00508352		0.413713	0.413713	457	4	0.00875273
GO:BP	entrainment of circadian clock by photoperiod	GO:0043153	28	27543		0.0417876	0.0417876	1170	8	0.00683761		1	1	745	2	0.00268456
GO:BP	postsynaptic density assembly	GO:0097107	22	27543		0.0419068	0.0419068	1544	8	0.00518135		1	1	677	2	0.00295421
GO:BP	response to light intensity	GO:0009642	18	27543		0.0420108	0.0420108	511	5	0.00978474		1	1	104	2	0.0192308
GO:BP	regulation of cell shape	GO:0008360	157	27543		0.0420297	0.0420297	1504	23	0.0152926		1	1	12	1	0.0833333
GO:BP	negative regulation of protein localization	GO:1903828	220	27543		0.0423223	0.0423223	1701	31	0.0182246		1	1	794	11	0.0138539
GO:BP	cerebellar Purkinje cell layer development	GO:0021680	38	27543		0.042479	0.042479	1741	11	0.00631821		1	1	422	3	0.007109
GO:BP	ARF protein signal transduction	GO:0032011	19	27543		0.0429625	0.0429625	842	6	0.00712589		1	1	808	3	0.00371287
GO:BP	regulation of ARF protein signal transduction	GO:0032012	19	27543		0.0429625	0.0429625	842	6	0.00712589		1	1	808	3	0.00371287
GO:BP	inhibitory synapse assembly	GO:1904862	17	27543		0.0431375	0.0431375	1482	7	0.00472335		1	1	649	2	0.00308166
GO:BP	regulation of carbohydrate metabolic process	GO:0006109	197	27543		0.0432159	0.0432159	1363	25	0.0183419		1	1	12	2	0.166667
GO:BP	cellular component disassembly	GO:0022411	422	27543		0.0435314	0.0435314	1553	46	0.0296201		1	1	42	3	0.0714286
GO:BP	morphogenesis of a branching epithelium	GO:0061138	206	27543		0.0443646	0.0443646	1736	30	0.0172811		1	1	828	11	0.013285
GO:BP	semaphorin-plexin signaling pathway involved in axon guidance	GO:1902287	15	27543		0.0445039	0.0445039	1736	7	0.00403226		1	1	223	1	0.00448431
GO:BP	negative regulation of catabolic process	GO:0009895	314	27543		0.0452481	0.0452481	1602	38	0.0237204		1	1	133	2	0.0150376
GO:BP	regulation of synaptic vesicle cycle	GO:0098693	12	27543		0.0452874	0.0452874	830	5	0.0060241		1	1	-1	-1	1
GO:BP	regulation of plasma membrane bounded cell projection assembly	GO:0120032	204	27543		0.0461446	0.0461446	1579	28	0.0177327		1	1	736	8	0.0108696
GO:BP	preganglionic parasympathetic fiber development	GO:0021783	15	27543		0.0467315	0.0467315	1749	7	0.00400229		1	1	223	1	0.00448431
GO:BP	trabecula morphogenesis	GO:0061383	53	27543		0.0471568	0.0471568	1722	13	0.00754936		1	1	181	1	0.00552486
GO:BP	social behavior	GO:0035176	57	27543		0.047361	0.047361	1591	13	0.00817096		1	1	234	3	0.0128205
GO:BP	regulation of protein targeting	GO:1903533	56	27543		0.0481683	0.0481683	939	10	0.0106496		1	1	634	3	0.00473186
GO:BP	regulation of RNA biosynthetic process	GO:2001141	3483	27543		0.0485606	0.0485606	1756	280	0.159453		1	1	186	32	0.172043
GO:BP	cellular response to peptide hormone stimulus	GO:0071375	311	27543		0.0496429	0.0496429	1750	40	0.0228571		1	1	56	2	0.0357143
GO:BP	regulation of epinephrine secretion	GO:0014060	7	27543		0.0519746	0.0519746	1737	5	0.00287853		0.0250546	0.0250546	671	4	0.00596125
GO:BP	positive regulation of ERK1 and ERK2 cascade	GO:0070374	229	27543		0.055291	0.055291	1736	32	0.0184332		0.00158457	0.00158457	430	16	0.0372093
GO:BP	epinephrine transport	GO:0048241	11	27543		0.0607535	0.0607535	1737	6	0.00345423		0.00751854	0.00751854	671	5	0.00745157
GO:BP	neuromuscular synaptic transmission	GO:0007274	26	27543		0.0610877	0.0610877	1341	8	0.0059657		0.0149125	0.0149125	290	5	0.0172414
GO:BP	axon ensheathment	GO:0008366	174	27543		0.066412	0.066412	1693	26	0.0153574		0.0101371	0.0101371	581	15	0.0258176
GO:BP	ensheathment of neurons	GO:0007272	174	27543		0.066412	0.066412	1693	26	0.0153574		0.0101371	0.0101371	581	15	0.0258176
GO:BP	regulation of anion transport	GO:0044070	113	27543		0.0738027	0.0738027	1746	20	0.0114548		0.000442011	0.000442011	274	10	0.0364963
GO:BP	oligodendrocyte differentiation	GO:0048709	120	27543		0.0805738	0.0805738	1377	18	0.0130719		0.00303295	0.00303295	878	16	0.0182232
GO:BP	positive regulation of catecholamine secretion	GO:0033605	18	27543		0.082711	0.082711	1530	7	0.00457516		0.00108534	0.00108534	494	6	0.0121457
GO:BP	negative regulation of amino acid transport	GO:0051956	20	27543		0.0827733	0.0827733	1352	7	0.00517751		0.0010831	0.0010831	727	7	0.00962861
GO:BP	positive regulation of cytoskeleton organization	GO:0051495	205	27543		0.109717	0.109717	1298	24	0.01849		0.00437832	0.00437832	112	8	0.0714286
GO:BP	regulation of sensory perception	GO:0051931	60	27543		0.110049	0.110049	1631	13	0.00797057		0.00382578	0.00382578	519	9	0.017341
GO:BP	positive regulation of supramolecular fiber organization	GO:1902905	182	27543		0.123296	0.123296	1102	20	0.0181488		0.00206768	0.00206768	79	7	0.0886076
GO:BP	regulation of glial cell differentiation	GO:0045685	92	27543		0.136609	0.136609	1377	15	0.0108932		0.020238	0.020238	766	12	0.0156658
GO:BP	myelination	GO:0042552	171	27543		0.136723	0.136723	1693	25	0.0147667		0.037655	0.037655	581	14	0.0240964
GO:BP	cellular response to inorganic substance	GO:0071241	285	27543		0.1863	0.1863	1544	33	0.0213731		0.000539633	0.000539633	85	9	0.105882
GO:BP	G protein-coupled serotonin receptor signaling pathway	GO:0098664	40	27543		0.223299	0.223299	1620	10	0.00617284		1.00445e-05	1.00445e-05	398	9	0.0226131
GO:BP	drinking behavior	GO:0042756	17	27543		0.226145	0.226145	390	4	0.0102564		0.00892294	0.00892294	182	4	0.021978
GO:BP	cellular response to catecholamine stimulus	GO:0071870	103	27543		0.257522	0.257522	1448	16	0.0110497		2.95097e-06	2.95097e-06	817	18	0.0220318
GO:BP	cellular response to monoamine stimulus	GO:0071868	103	27543		0.257522	0.257522	1448	16	0.0110497		2.95097e-06	2.95097e-06	817	18	0.0220318
GO:BP	cellular response to dopamine	GO:1903351	88	27543		0.261425	0.261425	1352	14	0.010355		9.66e-07	9.66e-07	398	13	0.0326633
GO:BP	positive regulation of blood pressure	GO:0045777	51	27543		0.281011	0.281011	1548	11	0.00710594		0.0333657	0.0333657	289	6	0.0207612
GO:BP	G protein-coupled receptor signaling pathway, coupled to cyclic nucleotide second messenger	GO:0007187	49	27543		0.28644	0.28644	1620	11	0.00679012		5.96542e-05	5.96542e-05	274	8	0.0291971
GO:BP	response to dopamine	GO:1903350	89	27543		0.296388	0.296388	1352	14	0.010355		1.11673e-06	1.11673e-06	398	13	0.0326633
GO:BP	regulation of glutamate secretion	GO:0014048	24	27543		0.310891	0.310891	1352	7	0.00517751		0.00447731	0.00447731	247	5	0.0202429
GO:BP	feeding behavior	GO:0007631	128	27543		0.33444	0.33444	1708	20	0.0117096		6.45e-10	6.45e-10	577	21	0.0363951
GO:BP	negative regulation of anion transport	GO:1903792	32	27543		0.335385	0.335385	1352	8	0.00591716		2.23828e-05	2.23828e-05	771	10	0.0129702
GO:BP	regulation of sensory perception of pain	GO:0051930	59	27543		0.412692	0.412692	1631	12	0.00735745		0.00330662	0.00330662	519	9	0.017341
GO:BP	dendrite extension	GO:0097484	42	27543		0.421264	0.421264	1658	10	0.00603136		0.00682796	0.00682796	19	3	0.157895
GO:BP	serotonin receptor signaling pathway	GO:0007210	43	27543		0.42985	0.42985	1620	10	0.00617284		1.99373e-05	1.99373e-05	398	9	0.0226131
GO:BP	response to monoamine	GO:0071867	108	27543		0.456184	0.456184	1448	16	0.0110497		6.51486e-06	6.51486e-06	817	18	0.0220318
GO:BP	response to catecholamine	GO:0071869	108	27543		0.456184	0.456184	1448	16	0.0110497		6.51486e-06	6.51486e-06	817	18	0.0220318
GO:BP	positive regulation of cell growth	GO:0030307	202	27543		0.589982	0.589982	1658	26	0.0156815		0.0217062	0.0217062	19	4	0.210526
GO:BP	olfactory lobe development	GO:0021988	46	27543		0.601053	0.601053	1569	10	0.00637349		0.035102	0.035102	190	5	0.0263158
GO:BP	adenylate cyclase-inhibiting G protein-coupled acetylcholine receptor signaling pathway	GO:0007197	8	27543		0.730874	0.730874	1260	4	0.0031746		0.000874866	0.000874866	243	4	0.0164609
GO:BP	postsynaptic modulation of chemical synaptic transmission	GO:0099170	22	27543		0.756652	0.756652	1197	6	0.00501253		0.0303631	0.0303631	59	3	0.0508475
GO:BP	glial cell development	GO:0021782	116	27543		0.820568	0.820568	1416	16	0.0112994		0.0103123	0.0103123	772	14	0.0181347
GO:BP	neuropeptide signaling pathway	GO:0007218	107	27543		0.858437	0.858437	1708	17	0.00995316		1.26e-15	1.26e-15	671	26	0.0387481
GO:BP	innervation	GO:0060384	29	27543		0.884429	0.884429	1736	8	0.0046083		0.0248975	0.0248975	766	7	0.00913838
GO:BP	phospholipase C-activating G protein-coupled receptor signaling pathway	GO:0007200	98	27543		1	1	1736	12	0.00691244		7.59e-07	7.59e-07	791	18	0.022756
GO:BP	regulation of feeding behavior	GO:0060259	40	27543		1	1	1708	8	0.00468384		4.37283e-06	4.37283e-06	671	11	0.0163934
GO:BP	negative regulation of G protein-coupled receptor signaling pathway	GO:0045744	59	27543		1	1	1624	8	0.00492611		2.2975e-05	2.2975e-05	796	13	0.0163317
GO:BP	eating behavior	GO:0042755	54	27543		1	1	305	3	0.00983607		0.000342291	0.000342291	577	10	0.017331
GO:BP	positive regulation of synaptic transmission, GABAergic	GO:0032230	17	27543		1	1	1383	5	0.00361533		0.000502343	0.000502343	463	6	0.012959
GO:BP	tachykinin receptor signaling pathway	GO:0007217	8	27543		1	1	1624	2	0.00123153		0.000566721	0.000566721	218	4	0.0183486
GO:BP	saliva secretion	GO:0046541	14	27543		1	1	1530	5	0.00326797		0.00067383	0.00067383	118	4	0.0338983
GO:BP	regulation of eating behavior	GO:1903998	15	27543		1	1	1708	5	0.0029274		0.00076304	0.00076304	577	6	0.0103986
GO:BP	oligodendrocyte development	GO:0014003	47	27543		1	1	1377	6	0.0043573		0.00124373	0.00124373	772	10	0.0129534
GO:BP	synaptic transmission, cholinergic	GO:0007271	31	27543		1	1	1352	6	0.00443787		0.00165963	0.00165963	290	6	0.0206897
GO:BP	positive regulation of dendrite extension	GO:1903861	28	27543		1	1	208	3	0.0144231		0.00196039	0.00196039	19	3	0.157895
GO:BP	regulation of dendrite extension	GO:1903859	31	27543		1	1	208	3	0.0144231		0.00268634	0.00268634	19	3	0.157895
GO:BP	G protein-coupled receptor signaling pathway	GO:0007186	2346	27543		1	1	44	9	0.204545		0.00349218	0.00349218	260	46	0.176923
GO:BP	positive regulation of smooth muscle contraction	GO:0045987	34	27543		1	1	1383	6	0.0043384		0.00609569	0.00609569	519	7	0.0134875
GO:BP	negative regulation of acute inflammatory response to antigenic stimulus	GO:0002865	6	27543		1	1	153	1	0.00653595		0.00693872	0.00693872	151	3	0.0198676
GO:BP	positive regulation of flagellated sperm motility	GO:1902093	14	27543		1	1	1548	1	0.000645995		0.00780692	0.00780692	218	4	0.0183486
GO:BP	positive regulation of cilium-dependent cell motility	GO:2000155	14	27543		1	1	1548	1	0.000645995		0.00780692	0.00780692	218	4	0.0183486
GO:BP	positive regulation of cilium movement	GO:0003353	15	27543		1	1	1548	1	0.000645995		0.0105798	0.0105798	218	4	0.0183486
GO:BP	response to ethanol	GO:0045471	165	27543		1	1	1737	22	0.0126655		0.0127856	0.0127856	791	17	0.0214918
GO:BP	digestion	GO:0007586	124	27543		1	1	1737	14	0.00805987		0.0146487	0.0146487	453	11	0.0242826
GO:BP	microglial cell proliferation	GO:0061518	8	27543		1	1	734	1	0.0013624		0.016156	0.016156	506	4	0.00790514
GO:BP	norepinephrine transport	GO:0015874	27	27543		1	1	18	1	0.0555556		0.0213382	0.0213382	525	6	0.0114286
GO:BP	negative regulation of behavior	GO:0048521	28	27543		1	1	1708	4	0.00234192		0.0238421	0.0238421	791	7	0.00884956
GO:BP	regulation of chloride transport	GO:2001225	12	27543		1	1	1467	2	0.00136333		0.024805	0.024805	771	5	0.00648508
GO:BP	regulation of norepinephrine secretion	GO:0014061	18	27543		1	1	250	2	0.008		0.025814	0.025814	486	5	0.0102881
GO:BP	regulation of oligodendrocyte differentiation	GO:0048713	54	27543		1	1	1377	8	0.00580973		0.0287291	0.0287291	745	9	0.0120805
GO:BP	diencephalon development	GO:0021536	79	27543		1	1	118	2	0.0169492		0.0339627	0.0339627	791	11	0.0139064
GO:BP	norepinephrine secretion	GO:0048243	19	27543		1	1	18	1	0.0555556		0.0345261	0.0345261	486	5	0.0102881
GO:BP	excretion	GO:0007588	50	27543		1	1	1746	7	0.00400916		0.0353182	0.0353182	298	6	0.0201342
GO:BP	aggressive behavior	GO:0002118	10	27543		1	1	1264	3	0.00237342		0.0460284	0.0460284	157	3	0.0191083

## Sheet: GO-MF Down
source	term_name	term_id	term_size	effective_domain_size		p_adj_color	adjusted_p_value__CX_Down	query_size__CX_Down	intersection_size__CX_Down	gene_ratio_CX_Down		p_adj_color	adjusted_p_value__CB_Down	query_size__CB_Down	intersection_size__CB_Down	gene_ratio_CB_Down
GO:MF	protein binding	GO:0005515	10481	25412		1.74e-102	1.74e-102	1754	1160	0.661345		4.38e-26	4.38e-26	876	522	0.59589
GO:MF	binding	GO:0005488	16232	25412		1.01e-48	1.01e-48	1739	1390	0.79931		3.18e-08	3.18e-08	876	648	0.739726
GO:MF	metal ion transmembrane transporter activity	GO:0046873	417	25412		8.83e-36	8.83e-36	1632	110	0.067402		2.58e-18	2.58e-18	874	60	0.0686499
GO:MF	gated channel activity	GO:0022836	324	25412		1.65e-32	1.65e-32	1626	92	0.0565806		4.65e-32	4.65e-32	874	69	0.0789474
GO:MF	voltage-gated ion channel activity	GO:0005244	190	25412		2.32e-32	2.32e-32	1626	70	0.0430504		2.47e-26	2.47e-26	874	49	0.0560641
GO:MF	voltage-gated channel activity	GO:0022832	191	25412		3.44e-32	3.44e-32	1626	70	0.0430504		3.22e-26	3.22e-26	874	49	0.0560641
GO:MF	cation channel activity	GO:0005261	331	25412		1.43e-31	1.43e-31	1632	92	0.0563725		1.72e-24	1.72e-24	874	61	0.069794
GO:MF	ion channel activity	GO:0005216	438	25412		8.09e-31	8.09e-31	1632	106	0.064951		2.72e-25	2.72e-25	821	69	0.0840438
GO:MF	voltage-gated cation channel activity	GO:0022843	140	25412		8.13e-30	8.13e-30	1626	58	0.0356704		4.51e-23	4.51e-23	874	40	0.0457666
GO:MF	passive transmembrane transporter activity	GO:0022803	481	25412		4.96e-29	4.96e-29	1632	109	0.0667892		2.66e-24	2.66e-24	821	71	0.0864799
GO:MF	channel activity	GO:0015267	481	25412		4.96e-29	4.96e-29	1632	109	0.0667892		2.66e-24	2.66e-24	821	71	0.0864799
GO:MF	inorganic molecular entity transmembrane transporter activity	GO:0015318	699	25412		1.02e-28	1.02e-28	1632	135	0.0827206		1.36e-19	1.36e-19	821	79	0.0962241
GO:MF	inorganic cation transmembrane transporter activity	GO:0022890	557	25412		1.12e-28	1.12e-28	1632	118	0.0723039		1.94e-18	1.94e-18	821	68	0.0828258
GO:MF	cation transmembrane transporter activity	GO:0008324	608	25412		8.9e-27	8.9e-27	1632	121	0.0741422		3.2e-18	3.2e-18	821	71	0.0864799
GO:MF	cytoskeletal protein binding	GO:0008092	1003	25412		9.45e-27	9.45e-27	1575	161	0.102222		0.0116381	0.0116381	850	59	0.0694118
GO:MF	ion transmembrane transporter activity	GO:0015075	825	25412		1.9e-26	1.9e-26	1632	145	0.088848		5.32e-18	5.32e-18	821	84	0.102314
GO:MF	potassium ion transmembrane transporter activity	GO:0015079	155	25412		4.42e-24	4.42e-24	1632	55	0.033701		2.34e-16	2.34e-16	874	35	0.0400458
GO:MF	transporter activity	GO:0005215	1162	25412		4.65e-24	4.65e-24	1632	175	0.10723		6.99e-14	6.99e-14	855	97	0.11345
GO:MF	transmembrane transporter activity	GO:0022857	1071	25412		7.49e-22	7.49e-22	1632	161	0.098652		8.84e-15	8.84e-15	855	94	0.109942
GO:MF	potassium channel activity	GO:0005267	119	25412		9.47e-22	9.47e-22	1632	46	0.0281863		2.14e-19	2.14e-19	874	34	0.0389016
GO:MF	nucleoside-triphosphatase regulator activity	GO:0060589	441	25412		1.76e-21	1.76e-21	1002	71	0.0708583		0.000329662	0.000329662	727	33	0.045392
GO:MF	GTPase regulator activity	GO:0030695	441	25412		1.76e-21	1.76e-21	1002	71	0.0708583		0.000329662	0.000329662	727	33	0.045392
GO:MF	actin binding	GO:0003779	449	25412		8.82e-20	8.82e-20	1563	88	0.056302		0.720041	0.720041	850	28	0.0329412
GO:MF	calmodulin binding	GO:0005516	184	25412		9.61e-20	9.61e-20	1583	54	0.0341124		3.61409e-06	3.61409e-06	36	7	0.194444
GO:MF	voltage-gated potassium channel activity	GO:0005249	87	25412		4.43e-19	4.43e-19	1505	36	0.0239203		1.28e-19	1.28e-19	792	29	0.0366162
GO:MF	enzyme binding	GO:0019899	2265	25412		9.98e-19	9.98e-19	1427	236	0.165382		1	1	741	75	0.101215
GO:MF	ion binding	GO:0043167	5914	25412		1.57e-18	1.57e-18	1580	527	0.333544		3.27823e-06	3.27823e-06	873	276	0.316151
GO:MF	molecular function regulator activity	GO:0098772	1951	25412		6.35e-18	6.35e-18	1419	209	0.147287		3.62177e-06	3.62177e-06	831	111	0.133574
GO:MF	transmembrane transporter binding	GO:0044325	146	25412		2.63e-17	2.63e-17	1649	46	0.0278957		0.000165758	0.000165758	745	18	0.0241611
GO:MF	GTPase activator activity	GO:0005096	239	25412		3.75e-16	3.75e-16	978	45	0.0460123		0.00327166	0.00327166	727	21	0.0288858
GO:MF	phosphotransferase activity, alcohol group as acceptor	GO:0016773	698	25412		1.68e-15	1.68e-15	1745	114	0.0653295		0.0380481	0.0380481	250	19	0.076
GO:MF	actin filament binding	GO:0051015	215	25412		2.2e-15	2.2e-15	1662	54	0.032491		1	1	850	13	0.0152941
GO:MF	protein kinase activity	GO:0004672	594	25412		5.08e-15	5.08e-15	1730	101	0.0583815		0.0505939	0.0505939	250	17	0.068
GO:MF	protein serine/threonine/tyrosine kinase activity	GO:0004712	430	25412		6.86e-15	6.86e-15	1730	82	0.0473988		0.108891	0.108891	868	30	0.0345622
GO:MF	kinase activity	GO:0016301	779	25412		2.22e-14	2.22e-14	1745	120	0.0687679		0.0543419	0.0543419	250	20	0.08
GO:MF	enzyme regulator activity	GO:0030234	1206	25412		2.32e-14	2.32e-14	930	106	0.113978		1	1	828	55	0.0664251
GO:MF	kinase binding	GO:0019900	841	25412		5e-14	5e-14	1489	113	0.0758899		1	1	12	2	0.166667
GO:MF	protein domain specific binding	GO:0019904	814	25412		7.59e-14	7.59e-14	1445	108	0.0747405		0.237322	0.237322	876	47	0.053653
GO:MF	calcium ion transmembrane transporter activity	GO:0015085	131	25412		2.44e-13	2.44e-13	1580	38	0.0240506		0.270198	0.270198	855	13	0.0152047
GO:MF	protein-containing complex binding	GO:0044877	1522	25412		2.59e-13	2.59e-13	1756	190	0.1082		1	1	535	49	0.0915888
GO:MF	protein kinase binding	GO:0019901	751	25412		3.07e-13	3.07e-13	1489	103	0.0691739		1	1	12	2	0.166667
GO:MF	structural constituent of synapse	GO:0098918	30	25412		5.3e-13	5.3e-13	1407	18	0.0127932		1	1	627	1	0.0015949
GO:MF	signaling receptor binding	GO:0005102	1679	25412		6.66e-13	6.66e-13	1756	203	0.115604		3.31931e-06	3.31931e-06	871	103	0.118255
GO:MF	calcium ion binding	GO:0005509	720	25412		8.13e-13	8.13e-13	1531	101	0.06597		2.7e-11	2.7e-11	872	68	0.0779817
GO:MF	anion binding	GO:0043168	2439	25412		1.9e-11	1.9e-11	1547	239	0.154493		1	1	868	100	0.115207
GO:MF	adenyl ribonucleotide binding	GO:0032559	1556	25412		1.96e-11	1.96e-11	1745	186	0.10659		1	1	250	23	0.092
GO:MF	calcium channel activity	GO:0005262	114	25412		2.2e-11	2.2e-11	1580	33	0.0208861		0.900366	0.900366	855	11	0.0128655
GO:MF	cation binding	GO:0043169	4191	25412		3.04e-11	3.04e-11	1580	372	0.235443		1.43e-07	1.43e-07	873	215	0.246277
GO:MF	ATP binding	GO:0005524	1486	25412		3.12e-11	3.12e-11	1745	179	0.102579		1	1	250	23	0.092
GO:MF	small molecule binding	GO:0036094	2561	25412		3.84e-11	3.84e-11	1547	247	0.159664		1	1	250	30	0.12
GO:MF	protein serine kinase activity	GO:0106310	341	25412		3.89e-11	3.89e-11	1538	60	0.0390117		1	1	868	22	0.0253456
GO:MF	adenyl nucleotide binding	GO:0030554	1570	25412		4.52e-11	4.52e-11	1745	186	0.10659		1	1	250	23	0.092
GO:MF	carbohydrate derivative binding	GO:0097367	2278	25412		4.68e-11	4.68e-11	1749	248	0.141795		1	1	357	46	0.128852
GO:MF	transferase activity, transferring phosphorus-containing groups	GO:0016772	928	25412		6.05e-11	6.05e-11	1745	126	0.0722063		0.510734	0.510734	250	20	0.08
GO:MF	protein serine/threonine kinase activity	GO:0004674	438	25412		6.16e-11	6.16e-11	1730	75	0.0433526		0.0682572	0.0682572	250	14	0.056
GO:MF	glutamate receptor binding	GO:0035254	65	25412		6.29e-11	6.29e-11	1073	21	0.0195713		0.000374732	0.000374732	791	12	0.0151707
GO:MF	ligand-gated ion channel activity	GO:0015276	134	25412		1.54e-10	1.54e-10	1505	34	0.0225914		8.05e-11	8.05e-11	817	26	0.0318237
GO:MF	metal ion binding	GO:0046872	4091	25412		1.91e-10	1.91e-10	1580	361	0.228481		8.53665e-06	8.53665e-06	873	203	0.232532
GO:MF	ligand-gated channel activity	GO:0022834	136	25412		2.44e-10	2.44e-10	1505	34	0.0225914		1.16e-10	1.16e-10	817	26	0.0318237
GO:MF	structural constituent of postsynapse	GO:0099186	22	25412		2.7e-10	2.7e-10	1407	14	0.00995025		1	1	627	1	0.0015949
GO:MF	purine ribonucleotide binding	GO:0032555	1919	25412		4.03e-10	4.03e-10	1733	212	0.122331		1	1	250	27	0.108
GO:MF	enzyme activator activity	GO:0008047	507	25412		7.61e-10	7.61e-10	889	53	0.0596175		1	1	727	24	0.0330124
GO:MF	channel regulator activity	GO:0016247	132	25412		7.75e-10	7.75e-10	1621	34	0.0209747		2.99825e-06	2.99825e-06	559	17	0.0304114
GO:MF	purine nucleotide binding	GO:0017076	1934	25412		8.57e-10	8.57e-10	1733	212	0.122331		1	1	250	27	0.108
GO:MF	ribonucleotide binding	GO:0032553	1938	25412		1.05e-09	1.05e-09	1733	212	0.122331		1	1	250	27	0.108
GO:MF	purine ribonucleoside triphosphate binding	GO:0035639	1839	25412		1.43e-09	1.43e-09	1733	203	0.117138		1	1	250	26	0.104
GO:MF	catalytic activity, acting on a protein	GO:0140096	2309	25412		2.2e-09	2.2e-09	1734	242	0.139562		1	1	868	86	0.0990783
GO:MF	cell adhesion molecule binding	GO:0050839	290	25412		3.19e-09	3.19e-09	1752	55	0.0313927		1	1	522	13	0.0249042
GO:MF	ion channel regulator activity	GO:0099106	124	25412		3.32e-09	3.32e-09	1621	32	0.0197409		0.000348043	0.000348043	559	14	0.0250447
GO:MF	nucleotide binding	GO:0000166	2188	25412		3.4e-09	3.4e-09	1733	231	0.133295		1	1	250	27	0.108
GO:MF	nucleoside phosphate binding	GO:1901265	2188	25412		3.4e-09	3.4e-09	1733	231	0.133295		1	1	250	27	0.108
GO:MF	ligand-gated cation channel activity	GO:0099094	101	25412		8.17e-09	8.17e-09	1725	29	0.0168116		1.26032e-05	1.26032e-05	817	17	0.0208078
GO:MF	PDZ domain binding	GO:0030165	115	25412		2.75e-08	2.75e-08	1056	24	0.0227273		1	1	796	9	0.0113065
GO:MF	neurotransmitter receptor activity	GO:0030594	110	25412		3.35e-08	3.35e-08	1436	27	0.0188022		3.27e-18	3.27e-18	817	31	0.0379437
GO:MF	lipid binding	GO:0008289	828	25412		8.77e-08	8.77e-08	1498	96	0.0640854		0.160168	0.160168	19	5	0.263158
GO:MF	postsynaptic neurotransmitter receptor activity	GO:0098960	66	25412		9.35e-08	9.35e-08	1725	22	0.0127536		2.31e-13	2.31e-13	791	21	0.0265487
GO:MF	sodium ion transmembrane transporter activity	GO:0015081	138	25412		2.11e-07	2.11e-07	1403	29	0.02067		0.00218921	0.00218921	760	16	0.0210526
GO:MF	structural constituent of postsynaptic specialization	GO:0098879	12	25412		2.61e-07	2.61e-07	1312	9	0.00685976		1	1	-1	-1	1
GO:MF	voltage-gated calcium channel activity	GO:0005245	45	25412		3.18e-07	3.18e-07	1580	17	0.0107595		0.0630601	0.0630601	855	8	0.00935672
GO:MF	transferase activity	GO:0016740	2287	25412		4.41e-07	4.41e-07	1745	231	0.132378		1	1	338	38	0.112426
GO:MF	nuclear steroid receptor activity	GO:0003707	16	25412		4.6e-07	4.6e-07	1324	10	0.00755287		1	1	485	3	0.00618557
GO:MF	identical protein binding	GO:0042802	2299	25412		4.8e-07	4.8e-07	1756	233	0.132688		0.573228	0.573228	881	107	0.121453
GO:MF	guanyl-nucleotide exchange factor activity	GO:0005085	221	25412		5.54e-07	5.54e-07	1653	41	0.0248034		0.347525	0.347525	583	14	0.0240137
GO:MF	neurotransmitter receptor activity involved in regulation of postsynaptic membrane potential	GO:0099529	52	25412		5.99e-07	5.99e-07	1389	17	0.012239		1.05e-09	1.05e-09	778	16	0.0205656
GO:MF	structural constituent of postsynaptic density	GO:0098919	10	25412		1.09018e-06	1.09018e-06	1312	8	0.00609756		1	1	-1	-1	1
GO:MF	syntaxin-1 binding	GO:0017075	24	25412		1.2685e-06	1.2685e-06	1155	11	0.00952381		1	1	-1	-1	1
GO:MF	transcription factor binding	GO:0008134	612	25412		1.30375e-06	1.30375e-06	1721	82	0.0476467		1	1	174	9	0.0517241
GO:MF	protein dimerization activity	GO:0046983	1134	25412		2.33103e-06	2.33103e-06	1414	111	0.0785007		1	1	745	36	0.0483221
GO:MF	DNA-binding transcription factor binding	GO:0140297	498	25412		2.67966e-06	2.67966e-06	1721	70	0.040674		1	1	15	2	0.133333
GO:MF	catalytic activity	GO:0003824	5730	25412		3.2937e-06	3.2937e-06	1752	494	0.281963		1	1	2	1	0.5
GO:MF	SNARE binding	GO:0000149	110	25412		4.99095e-06	4.99095e-06	1210	22	0.0181818		1	1	744	8	0.0107527
GO:MF	syntaxin binding	GO:0019905	76	25412		6.8062e-06	6.8062e-06	1210	18	0.014876		1	1	673	5	0.00742942
GO:MF	growth factor binding	GO:0019838	139	25412		8.73115e-06	8.73115e-06	1246	25	0.0200642		1	1	7	1	0.142857
GO:MF	small GTPase binding	GO:0031267	275	25412		1.42983e-05	1.42983e-05	1531	42	0.0274331		1	1	790	14	0.0177215
GO:MF	calcium channel regulator activity	GO:0005246	37	25412		2.08577e-05	2.08577e-05	358	8	0.0223464		1	1	475	4	0.00842105
GO:MF	calmodulin-dependent protein kinase activity	GO:0004683	24	25412		2.1556e-05	2.1556e-05	1517	11	0.00725115		0.000959546	0.000959546	220	5	0.0227273
GO:MF	transmitter-gated ion channel activity involved in regulation of postsynaptic membrane potential	GO:1904315	49	25412		2.44715e-05	2.44715e-05	669	11	0.0164425		7.86e-08	7.86e-08	778	14	0.0179949
GO:MF	glutamate receptor activity	GO:0008066	27	25412		3.30008e-05	3.30008e-05	1725	12	0.00695652		3.58142e-05	3.58142e-05	778	9	0.0115681
GO:MF	G protein-coupled receptor binding	GO:0001664	313	25412		3.4647e-05	3.4647e-05	1030	35	0.0339806		0.0393794	0.0393794	705	22	0.0312057
GO:MF	phosphatase binding	GO:0019902	226	25412		3.76209e-05	3.76209e-05	1448	35	0.0241713		1	1	796	7	0.00879397
GO:MF	phosphoric ester hydrolase activity	GO:0042578	356	25412		6.55634e-05	6.55634e-05	1473	47	0.0319077		1	1	856	19	0.0221963
GO:MF	calcium-dependent protein binding	GO:0048306	92	25412		7.29373e-05	7.29373e-05	471	12	0.0254777		1	1	796	7	0.00879397
GO:MF	phospholipid binding	GO:0005543	465	25412		7.32057e-05	7.32057e-05	1497	57	0.0380762		0.191601	0.191601	19	4	0.210526
GO:MF	steroid binding	GO:0005496	123	25412		7.72178e-05	7.72178e-05	1475	24	0.0162712		1	1	16	1	0.0625
GO:MF	sodium channel activity	GO:0005272	41	25412		0.000138682	0.000138682	1725	14	0.00811594		0.00126075	0.00126075	548	8	0.0145985
GO:MF	GTPase binding	GO:0051020	309	25412		0.000145749	0.000145749	1531	43	0.0280862		1	1	790	15	0.0189873
GO:MF	transmitter-gated channel activity	GO:0022835	58	25412		0.000154252	0.000154252	669	11	0.0164425		8.37e-11	8.37e-11	817	18	0.0220318
GO:MF	transmitter-gated ion channel activity	GO:0022824	58	25412		0.000154252	0.000154252	669	11	0.0164425		8.37e-11	8.37e-11	817	18	0.0220318
GO:MF	delayed rectifier potassium channel activity	GO:0005251	29	25412		0.000175281	0.000175281	1154	10	0.00866551		1.3516e-05	1.3516e-05	874	10	0.0114416
GO:MF	alcohol binding	GO:0043178	88	25412		0.000297152	0.000297152	1475	19	0.0128814		1	1	822	2	0.00243309
GO:MF	ionotropic glutamate receptor binding	GO:0035255	35	25412		0.000474335	0.000474335	1312	11	0.00838415		1	1	791	4	0.00505689
GO:MF	protein phosphatase regulator activity	GO:0019888	85	25412		0.000627712	0.000627712	627	12	0.0191388		1	1	446	4	0.00896861
GO:MF	MAP kinase activity	GO:0004707	17	25412		0.000789116	0.000789116	957	7	0.00731452		1	1	-1	-1	1
GO:MF	ionotropic glutamate receptor activity	GO:0004970	19	25412		0.000797532	0.000797532	1725	9	0.00521739		0.00865371	0.00865371	778	6	0.00771208
GO:MF	ankyrin binding	GO:0030506	23	25412		0.000822229	0.000822229	1369	9	0.00657414		1	1	635	2	0.00314961
GO:MF	RNA polymerase II-specific DNA-binding transcription factor binding	GO:0061629	372	25412		0.000834395	0.000834395	1588	48	0.0302267		1	1	789	17	0.0215463
GO:MF	phosphatase regulator activity	GO:0019208	103	25412		0.000836027	0.000836027	627	13	0.0207337		1	1	446	4	0.00896861
GO:MF	phosphoprotein phosphatase activity	GO:0004721	163	25412		0.000864547	0.000864547	1627	28	0.0172096		1	1	732	6	0.00819672
GO:MF	extracellular ligand-gated ion channel activity	GO:0005230	71	25412		0.000892013	0.000892013	1436	16	0.0111421		3.52e-10	3.52e-10	817	19	0.0232558
GO:MF	protein homodimerization activity	GO:0042803	759	25412		0.000965202	0.000965202	1208	66	0.0546358		1	1	774	25	0.0322997
GO:MF	transcription coregulator binding	GO:0001221	127	25412		0.00107062	0.00107062	1533	23	0.0150033		1	1	789	10	0.0126743
GO:MF	inward rectifier potassium channel activity	GO:0005242	22	25412		0.00115738	0.00115738	1505	9	0.00598007		0.0529248	0.0529248	556	5	0.00899281
GO:MF	G protein-coupled neurotransmitter receptor activity	GO:0099528	10	25412		0.00139567	0.00139567	1260	6	0.00476191		1.12099e-05	1.12099e-05	247	5	0.0202429
GO:MF	phosphatase activity	GO:0016791	267	25412		0.0017166	0.0017166	1627	38	0.0233559		1	1	774	11	0.0142119
GO:MF	nuclear receptor activity	GO:0004879	47	25412		0.00187282	0.00187282	1568	13	0.00829082		1	1	560	5	0.00892857
GO:MF	ligand-activated transcription factor activity	GO:0098531	47	25412		0.00187282	0.00187282	1568	13	0.00829082		1	1	560	5	0.00892857
GO:MF	potassium channel regulator activity	GO:0015459	46	25412		0.00207147	0.00207147	1621	13	0.00801974		1	1	559	5	0.00894454
GO:MF	inositol 1,4,5 trisphosphate binding	GO:0070679	17	25412		0.00210278	0.00210278	166	4	0.0240964		1	1	822	2	0.00243309
GO:MF	cadherin binding	GO:0045296	66	25412		0.00252094	0.00252094	1485	15	0.010101		1	1	829	5	0.00603136
GO:MF	scaffold protein binding	GO:0097110	82	25412		0.00267335	0.00267335	1030	14	0.0135922		1	1	796	7	0.00879397
GO:MF	anion transmembrane transporter activity	GO:0008509	314	25412		0.0026738	0.0026738	1403	38	0.0270848		1	1	773	19	0.0245796
GO:MF	ligand-gated calcium channel activity	GO:0099604	25	25412		0.00303534	0.00303534	1453	9	0.00619408		1	1	754	1	0.00132626
GO:MF	molecular adaptor activity	GO:0060090	416	25412		0.00303958	0.00303958	1485	48	0.0323232		1	1	527	12	0.0227704
GO:MF	G protein-coupled amine receptor activity	GO:0008227	63	25412		0.00305257	0.00305257	1383	14	0.0101229		0.000212473	0.000212473	274	8	0.0291971
GO:MF	cytoskeletal motor activity	GO:0003774	112	25412		0.00317343	0.00317343	1733	22	0.0126947		1	1	353	4	0.0113314
GO:MF	group II metabotropic glutamate receptor activity	GO:0001641	2	25412		0.00325206	0.00325206	63	2	0.031746		1	1	237	1	0.00421941
GO:MF	transcription coregulator activity	GO:0003712	468	25412		0.00345314	0.00345314	1722	58	0.0336818		1	1	46	2	0.0434783
GO:MF	protein tyrosine phosphatase activity	GO:0004725	94	25412		0.00359301	0.00359301	1627	19	0.0116779		1	1	732	4	0.00546448
GO:MF	synaptic receptor adaptor activity	GO:0030160	4	25412		0.00380349	0.00380349	1312	4	0.00304878		1	1	-1	-1	1
GO:MF	SH3 domain binding	GO:0017124	125	25412		0.00418104	0.00418104	889	16	0.0179977		1	1	876	7	0.00799087
GO:MF	glutamate binding	GO:0016595	12	25412		0.00429147	0.00429147	661	5	0.0075643		1	1	801	2	0.00249688
GO:MF	protein N-terminus binding	GO:0047485	127	25412		0.00531305	0.00531305	1689	23	0.0136175		1	1	3	1	0.333333
GO:MF	protein phosphatase binding	GO:0019903	179	25412		0.00574669	0.00574669	1448	26	0.0179558		1	1	796	6	0.00753769
GO:MF	clathrin binding	GO:0030276	67	25412		0.00593618	0.00593618	1005	12	0.0119403		1	1	135	2	0.0148148
GO:MF	transmembrane receptor protein kinase activity	GO:0019199	81	25412		0.00678691	0.00678691	1634	17	0.0104039		1	1	665	5	0.0075188
GO:MF	molecular function inhibitor activity	GO:0140678	59	25412		0.00690486	0.00690486	1377	13	0.00944081		1	1	745	6	0.00805369
GO:MF	DNA-binding transcription repressor activity	GO:0001217	340	25412		0.00696511	0.00696511	1349	38	0.028169		1	1	273	8	0.029304
GO:MF	transcription corepressor activity	GO:0003714	181	25412		0.00701433	0.00701433	1721	29	0.0168507		1	1	242	2	0.00826446
GO:MF	phosphatase inhibitor activity	GO:0019212	48	25412		0.0087237	0.0087237	1015	10	0.00985222		1	1	267	2	0.00749064
GO:MF	protein-macromolecule adaptor activity	GO:0030674	313	25412		0.00893668	0.00893668	1485	38	0.0255892		1	1	527	11	0.0208729
GO:MF	active ion transmembrane transporter activity	GO:0022853	237	25412		0.0108259	0.0108259	1403	30	0.0213828		1	1	796	11	0.0138191
GO:MF	phosphatidylinositol 3-kinase binding	GO:0043548	39	25412		0.013062	0.013062	1335	10	0.00749064		1	1	341	3	0.00879765
GO:MF	DNA-binding transcription repressor activity, RNA polymerase II-specific	GO:0001227	338	25412		0.0142148	0.0142148	1349	37	0.0274277		1	1	273	8	0.029304
GO:MF	symporter activity	GO:0015293	140	25412		0.0192817	0.0192817	1206	19	0.0157546		1	1	724	8	0.0110497
GO:MF	transmembrane receptor protein tyrosine kinase activity	GO:0004714	63	25412		0.0198803	0.0198803	1634	14	0.00856793		1	1	338	3	0.00887574
GO:MF	protein phosphatase inhibitor activity	GO:0004864	43	25412		0.0222373	0.0222373	1015	9	0.008867		1	1	267	2	0.00749064
GO:MF	GABA receptor activity	GO:0016917	22	25412		0.0253717	0.0253717	1201	7	0.00582848		8.43635e-05	8.43635e-05	771	8	0.0103761
GO:MF	mitogen-activated protein kinase kinase binding	GO:0031434	16	25412		0.0259028	0.0259028	1160	6	0.00517241		1	1	-1	-1	1
GO:MF	phosphatidylinositol phosphate binding	GO:1901981	178	25412		0.0259698	0.0259698	1497	25	0.0167001		1	1	1	1	1
GO:MF	glutamate-gated calcium ion channel activity	GO:0022849	5	25412		0.0260717	0.0260717	1436	4	0.00278552		1	1	754	1	0.00132626
GO:MF	MAP kinase phosphatase activity	GO:0033549	18	25412		0.0261206	0.0261206	1013	6	0.005923		1	1	662	1	0.00151057
GO:MF	adrenergic receptor activity	GO:0004935	9	25412		0.0267067	0.0267067	1383	5	0.00361533		1	1	687	1	0.0014556
GO:MF	bHLH transcription factor binding	GO:0043425	34	25412		0.0309491	0.0309491	1721	10	0.00581058		1	1	-1	-1	1
GO:MF	ion channel inhibitor activity	GO:0008200	29	25412		0.0314942	0.0314942	1255	8	0.0063745		1	1	475	2	0.00421053
GO:MF	protein tyrosine kinase activity	GO:0004713	139	25412		0.0315339	0.0315339	1720	23	0.0133721		1	1	436	7	0.016055
GO:MF	cholesterol binding	GO:0015485	47	25412		0.0327158	0.0327158	1475	11	0.00745763		1	1	-1	-1	1
GO:MF	integrin binding	GO:0005178	146	25412		0.0328078	0.0328078	1752	24	0.0136986		0.40698	0.40698	508	10	0.019685
GO:MF	MAP kinase tyrosine/serine/threonine phosphatase activity	GO:0017017	13	25412		0.0331419	0.0331419	451	4	0.00886918		1	1	662	1	0.00151057
GO:MF	L-glutamate transmembrane transporter activity	GO:0005313	12	25412		0.0342134	0.0342134	1017	5	0.00491642		1	1	638	1	0.0015674
GO:MF	sterol binding	GO:0032934	56	25412		0.0347674	0.0347674	1701	13	0.00764256		1	1	145	1	0.00689655
GO:MF	voltage-gated calcium channel activity involved in regulation of cytosolic calcium levels	GO:0099511	5	25412		0.0364513	0.0364513	1563	4	0.00255918		1	1	723	2	0.00276625
GO:MF	voltage-gated calcium channel activity involved in regulation of presynaptic cytosolic calcium levels	GO:0099626	5	25412		0.0364513	0.0364513	1563	4	0.00255918		1	1	723	2	0.00276625
GO:MF	acetylcholine receptor binding	GO:0033130	21	25412		0.0394915	0.0394915	279	4	0.0143369		1	1	652	2	0.00306749
GO:MF	phosphatidylserine binding	GO:0001786	64	25412		0.0404628	0.0404628	1284	12	0.00934579		1	1	865	7	0.00809249
GO:MF	potassium ion leak channel activity	GO:0022841	14	25412		0.0426729	0.0426729	1487	6	0.00403497		1	1	418	1	0.00239234
GO:MF	voltage-gated sodium channel activity	GO:0005248	24	25412		0.0428222	0.0428222	801	6	0.00749064		0.00256628	0.00256628	760	7	0.00921053
GO:MF	S100 protein binding	GO:0044548	14	25412		0.0454718	0.0454718	1504	6	0.00398936		1	1	668	2	0.00299401
GO:MF	inorganic anion transmembrane transporter activity	GO:0015103	151	25412		0.0455895	0.0455895	1399	21	0.0150107		1	1	771	9	0.0116732
GO:MF	structural constituent of cytoskeleton	GO:0005200	71	25412		0.0461159	0.0461159	1553	14	0.00901481		1	1	627	5	0.00797448
GO:MF	active transmembrane transporter activity	GO:0022804	384	25412		0.0462164	0.0462164	1206	36	0.0298507		1	1	724	11	0.0151934
GO:MF	transcription coactivator binding	GO:0001223	47	25412		0.0463014	0.0463014	1533	11	0.00717547		1	1	789	5	0.00633714
GO:MF	Roundabout binding	GO:0048495	9	25412		0.0489679	0.0489679	1569	5	0.00318674		1	1	80	1	0.0125
GO:MF	serotonin receptor activity	GO:0099589	39	25412		0.0668872	0.0668872	1620	10	0.00617284		4.02729e-06	4.02729e-06	398	9	0.0226131
GO:MF	G protein-coupled serotonin receptor activity	GO:0004993	39	25412		0.0668872	0.0668872	1620	10	0.00617284		4.02729e-06	4.02729e-06	398	9	0.0226131
GO:MF	G protein-coupled glutamate receptor activity	GO:0098988	8	25412		0.0901872	0.0901872	63	2	0.031746		0.0240736	0.0240736	237	3	0.0126582
GO:MF	adenylate cyclase inhibiting G protein-coupled glutamate receptor activity	GO:0001640	8	25412		0.0901872	0.0901872	63	2	0.031746		0.0240736	0.0240736	237	3	0.0126582
GO:MF	G protein-coupled acetylcholine receptor activity	GO:0016907	7	25412		0.100331	0.100331	1260	4	0.0031746		0.000155079	0.000155079	243	4	0.0164609
GO:MF	calcium-dependent phospholipid binding	GO:0005544	53	25412		0.148527	0.148527	1537	11	0.0071568		0.0167351	0.0167351	85	4	0.0470588
GO:MF	ligand-gated anion channel activity	GO:0099095	21	25412		0.173955	0.173955	1201	6	0.00499584		0.0156106	0.0156106	771	6	0.0077821
GO:MF	inhibitory extracellular ligand-gated ion channel activity	GO:0005237	17	25412		0.418525	0.418525	651	4	0.00614439		0.00395006	0.00395006	771	6	0.0077821
GO:MF	GABA-A receptor activity	GO:0004890	19	25412		0.654425	0.654425	651	4	0.00614439		0.00822118	0.00822118	771	6	0.0077821
GO:MF	acetylcholine receptor activity	GO:0015464	18	25412		0.79656	0.79656	1260	5	0.00396825		2.95e-07	2.95e-07	476	8	0.0168067
GO:MF	peptide receptor activity	GO:0001653	153	25412		0.933363	0.933363	1736	21	0.0120968		5.11e-07	5.11e-07	751	22	0.0292943
GO:MF	G-protein alpha-subunit binding	GO:0001965	38	25412		0.957233	0.957233	591	5	0.00846024		0.00548554	0.00548554	727	8	0.0110041
GO:MF	neuropeptide receptor activity	GO:0008188	44	25412		1	1	824	3	0.00364078		5.12e-08	5.12e-08	852	14	0.0164319
GO:MF	G protein-coupled peptide receptor activity	GO:0008528	144	25412		1	1	1736	20	0.0115207		1.56e-07	1.56e-07	751	22	0.0292943
GO:MF	neurotransmitter binding	GO:0042165	20	25412		1	1	870	4	0.0045977		0.000721188	0.000721188	476	6	0.012605
GO:MF	acetylcholine binding	GO:0042166	12	25412		1	1	870	2	0.00229885		0.000891333	0.000891333	476	5	0.0105042
GO:MF	neuropeptide Y receptor activity	GO:0004983	12	25412		1	1	824	2	0.00242718		0.00106944	0.00106944	494	5	0.0101215
GO:MF	signaling receptor regulator activity	GO:0030545	586	25412		1	1	1756	56	0.0318907		0.00180775	0.00180775	406	26	0.0640394
GO:MF	peptide binding	GO:0042277	351	25412		1	1	879	20	0.0227531		0.00305953	0.00305953	699	26	0.037196
GO:MF	signaling receptor activator activity	GO:0030546	541	25412		1	1	1756	49	0.0279043		0.00433602	0.00433602	406	24	0.0591133
GO:MF	structural constituent of myelin sheath	GO:0019911	10	25412		1	1	1610	1	0.000621118		0.00495072	0.00495072	847	5	0.00590319
GO:MF	benzodiazepine receptor activity	GO:0008503	11	25412		1	1	1201	3	0.00249792		0.00559485	0.00559485	771	5	0.00648508
GO:MF	acetylcholine-gated cation-selective channel activity	GO:0022848	16	25412		1	1	386	1	0.00259067		0.00580624	0.00580624	499	5	0.01002
GO:MF	receptor ligand activity	GO:0048018	533	25412		1	1	1756	48	0.0273349		0.0103866	0.0103866	406	23	0.0566502
GO:MF	neuropeptide binding	GO:0042923	36	25412		1	1	1552	5	0.00322165		0.011962	0.011962	616	7	0.0113636
GO:MF	tachykinin receptor activity	GO:0004995	3	25412		1	1	-1	-1	1		0.0146831	0.0146831	76	2	0.0263158
GO:MF	GABA-gated chloride ion channel activity	GO:0022851	13	25412		1	1	1201	4	0.00333056		0.0148159	0.0148159	771	5	0.00648508
GO:MF	excitatory extracellular ligand-gated ion channel activity	GO:0005231	33	25412		1	1	468	3	0.00641026		0.0218168	0.0218168	499	6	0.012024
GO:MF	A2A adenosine receptor binding	GO:0031687	3	25412		1	1	992	1	0.00100807		0.0281084	0.0281084	105	2	0.0190476
GO:MF	peptide YY receptor activity	GO:0001601	5	25412		1	1	-1	-1	1		0.0394028	0.0394028	494	3	0.00607287
GO:MF	neuromedin K receptor binding	GO:0031836	2	25412		1	1	1548	1	0.000645995		0.0406989	0.0406989	218	2	0.00917431
GO:MF	guanine deaminase activity	GO:0008892	1	25412		1	1	-1	-1	1		0.0437239	0.0437239	2	1	0.5
GO:MF	heparan sulfate proteoglycan binding	GO:0043395	24	25412		1	1	1569	4	0.00254939		0.0477751	0.0477751	495	5	0.010101
GO:MF	neuropeptide hormone activity	GO:0005184	26	25412		1	1	1247	4	0.0032077		0.0496301	0.0496301	234	4	0.017094
GO:MF	pancreatic polypeptide receptor activity	GO:0001602	4	25412		1	1	-1	-1	1		0.0498272	0.0498272	99	2	0.020202
