# Supplementary material for: Identifying Disease Signatures in the Spinocerebellar Ataxia Type 1 Mouse Cortex
Source: Cells. 2022 Aug 24;11(17):2632. doi: 10.3390/cells11172632 (PMC9454518; doi:10.3390/cells11172632)
Supplement: Supplementary file 1 [file cells-11-02632-s001.zip › Luttik et al._Table S5 [Shared and Unique GO terms of upregulated DEGs in SCA1 cortex and cerebellum].xlsx]

## Sheet: GO-BP Up
source	term_name	term_id	term_size	effective_domain_size		p_adj_color	adjusted_p_value__CX_Up	query_size__CX_Up	intersection_size__CX_Up	gene_ratio_CX_Up		p_adj_color	adjusted_p_value__CB_Up	query_size__CB_Up	intersection_size__CB_Up	gene_ratio_CB_Up
GO:BP	heterocycle biosynthetic process	GO:0018130	4039	27543		8.9e-18	8.9e-18	777	214	0.275418		1	1	216	43	0.199074
GO:BP	regulation of cellular metabolic process	GO:0031323	6103	27543		9.79e-18	9.79e-18	777	286	0.368082		0.0850611	0.0850611	222	75	0.337838
GO:BP	aromatic compound biosynthetic process	GO:0019438	4050	27543		1.24e-17	1.24e-17	777	214	0.275418		1	1	216	43	0.199074
GO:BP	regulation of nucleobase-containing compound metabolic process	GO:0019219	4088	27543		1.71e-17	1.71e-17	777	215	0.276705		1	1	216	50	0.231481
GO:BP	organic cyclic compound biosynthetic process	GO:1901362	4203	27543		4.47e-17	4.47e-17	777	218	0.280566		1	1	216	43	0.199074
GO:BP	nucleobase-containing compound biosynthetic process	GO:0034654	3971	27543		1.59e-16	1.59e-16	777	208	0.267696		1	1	216	43	0.199074
GO:BP	regulation of primary metabolic process	GO:0080090	5971	27543		2.84e-16	2.84e-16	777	277	0.356499		0.135978	0.135978	222	73	0.328829
GO:BP	organic substance biosynthetic process	GO:1901576	5770	27543		4.92e-16	4.92e-16	724	255	0.35221		1	1	216	56	0.259259
GO:BP	biosynthetic process	GO:0009058	5876	27543		6.33e-16	6.33e-16	724	258	0.356354		1	1	216	56	0.259259
GO:BP	regulation of RNA metabolic process	GO:0051252	3783	27543		1.97e-15	1.97e-15	777	198	0.254826		1	1	216	44	0.203704
GO:BP	cellular biosynthetic process	GO:0044249	5701	27543		3.98e-15	3.98e-15	724	250	0.345304		1	1	216	55	0.25463
GO:BP	regulation of nitrogen compound metabolic process	GO:0051171	5797	27543		5.57e-15	5.57e-15	777	267	0.343629		0.0493974	0.0493974	222	73	0.328829
GO:BP	cellular nitrogen compound biosynthetic process	GO:0044271	4774	27543		1.2e-14	1.2e-14	777	231	0.297297		1	1	6	3	0.5
GO:BP	regulation of macromolecule biosynthetic process	GO:0010556	3953	27543		1.1e-13	1.1e-13	777	199	0.256113		1	1	216	43	0.199074
GO:BP	regulation of biosynthetic process	GO:0009889	4220	27543		1.62e-13	1.62e-13	777	208	0.267696		1	1	216	45	0.208333
GO:BP	regulation of cellular biosynthetic process	GO:0031326	4136	27543		3.44e-13	3.44e-13	777	204	0.262548		1	1	216	45	0.208333
GO:BP	RNA biosynthetic process	GO:0032774	3614	27543		4.1e-13	4.1e-13	777	185	0.238095		1	1	222	43	0.193694
GO:BP	regulation of transcription, DNA-templated	GO:0006355	3474	27543		8.07e-13	8.07e-13	777	179	0.230373		1	1	222	42	0.189189
GO:BP	regulation of nucleic acid-templated transcription	GO:1903506	3475	27543		8.3e-13	8.3e-13	777	179	0.230373		1	1	222	42	0.189189
GO:BP	regulation of RNA biosynthetic process	GO:2001141	3483	27543		1.04e-12	1.04e-12	777	179	0.230373		1	1	222	42	0.189189
GO:BP	transcription, DNA-templated	GO:0006351	3596	27543		2.41e-12	2.41e-12	777	182	0.234234		1	1	222	43	0.193694
GO:BP	nucleic acid-templated transcription	GO:0097659	3597	27543		2.47e-12	2.47e-12	777	182	0.234234		1	1	222	43	0.193694
GO:BP	regulation of transcription by RNA polymerase II	GO:0006357	2494	27543		9.9e-12	9.9e-12	777	139	0.178893		0.77887	0.77887	213	35	0.164319
GO:BP	transcription by RNA polymerase II	GO:0006366	2560	27543		1.55e-11	1.55e-11	777	141	0.181467		0.612222	0.612222	213	36	0.169014
GO:BP	positive regulation of nucleobase-containing compound metabolic process	GO:0045935	2049	27543		5.74e-11	5.74e-11	773	119	0.153946		1	1	222	31	0.13964
GO:BP	regulation of metabolic process	GO:0019222	7320	27543		6.33e-11	6.33e-11	777	302	0.388674		0.288848	0.288848	222	84	0.378378
GO:BP	positive regulation of cellular metabolic process	GO:0031325	3386	27543		1.61e-10	1.61e-10	773	168	0.217335		0.35172	0.35172	213	45	0.211268
GO:BP	macromolecule biosynthetic process	GO:0009059	4797	27543		1.62e-10	1.62e-10	777	218	0.280566		1	1	216	50	0.231481
GO:BP	regulation of macromolecule metabolic process	GO:0060255	6825	27543		7.74e-10	7.74e-10	777	282	0.362934		0.669817	0.669817	222	78	0.351351
GO:BP	positive regulation of cellular process	GO:0048522	6072	27543		3.73e-09	3.73e-09	773	254	0.32859		0.00164601	0.00164601	213	78	0.366197
GO:BP	positive regulation of nitrogen compound metabolic process	GO:0051173	3177	27543		3.85e-09	3.85e-09	773	156	0.201811		0.0163502	0.0163502	213	47	0.220657
GO:BP	regulation of gene expression	GO:0010468	5415	27543		3.03e-08	3.03e-08	777	230	0.29601		1	1	216	56	0.259259
GO:BP	positive regulation of metabolic process	GO:0009893	3908	27543		4.32e-08	4.32e-08	773	178	0.230272		0.00996757	0.00996757	213	55	0.258216
GO:BP	cellular macromolecule metabolic process	GO:0044260	5820	27543		6.28e-08	6.28e-08	758	237	0.312665		1	1	222	66	0.297297
GO:BP	positive regulation of macromolecule metabolic process	GO:0010604	3592	27543		8.51e-08	8.51e-08	773	166	0.214748		0.00389114	0.00389114	213	53	0.248826
GO:BP	nervous system development	GO:0007399	2479	27543		9.74e-08	9.74e-08	773	126	0.163001		2.22255e-05	2.22255e-05	217	47	0.21659
GO:BP	positive regulation of macromolecule biosynthetic process	GO:0010557	1911	27543		1.51e-07	1.51e-07	773	104	0.134541		1	1	222	25	0.112613
GO:BP	positive regulation of RNA metabolic process	GO:0051254	1836	27543		1.63e-07	1.63e-07	773	101	0.13066		1	1	222	26	0.117117
GO:BP	generation of neurons	GO:0048699	1587	27543		1.93e-07	1.93e-07	773	91	0.117723		0.000290434	0.000290434	210	33	0.157143
GO:BP	positive regulation of biological process	GO:0048518	6629	27543		2.55e-07	2.55e-07	773	264	0.341527		0.000827133	0.000827133	213	84	0.394366
GO:BP	cellular metabolic process	GO:0044237	13166	27543		4.3e-07	4.3e-07	728	432	0.593407		1	1	131	64	0.48855
GO:BP	positive regulation of biosynthetic process	GO:0009891	2080	27543		4.51e-07	4.51e-07	773	109	0.141009		1	1	222	27	0.121622
GO:BP	positive regulation of cellular biosynthetic process	GO:0031328	2030	27543		4.89e-07	4.89e-07	773	107	0.138422		1	1	222	26	0.117117
GO:BP	regulation of cellular process	GO:0050794	12487	27543		5.14e-07	5.14e-07	764	432	0.565445		0.000294148	0.000294148	222	139	0.626126
GO:BP	developmental process	GO:0032502	6788	27543		7.03e-07	7.03e-07	773	267	0.345408		0.000145794	0.000145794	217	89	0.410138
GO:BP	catabolic process	GO:0009056	2454	27543		8.05e-07	8.05e-07	764	121	0.158377		1	1	2	1	0.5
GO:BP	neuron differentiation	GO:0030182	1514	27543		1.07926e-06	1.07926e-06	773	86	0.111255		0.00101221	0.00101221	210	31	0.147619
GO:BP	neurogenesis	GO:0022008	1822	27543		1.09283e-06	1.09283e-06	773	98	0.126779		0.000765712	0.000765712	210	35	0.166667
GO:BP	cellular catabolic process	GO:0044248	2111	27543		1.10082e-06	1.10082e-06	764	108	0.141361		1	1	2	1	0.5
GO:BP	DNA metabolic process	GO:0006259	976	27543		1.18204e-06	1.18204e-06	742	62	0.083558		1	1	113	9	0.079646
GO:BP	organelle organization	GO:0006996	3787	27543		1.53987e-06	1.53987e-06	676	151	0.223373		1	1	3	2	0.666667
GO:BP	negative regulation of cellular process	GO:0048523	5155	27543		1.93501e-06	1.93501e-06	773	213	0.27555		0.0607044	0.0607044	203	62	0.305419
GO:BP	biological regulation	GO:0065007	14043	27543		1.94525e-06	1.94525e-06	764	472	0.617801		0.00288495	0.00288495	222	148	0.666667
GO:BP	central nervous system development	GO:0007417	1031	27543		3.0074e-06	3.0074e-06	772	65	0.0841969		1	1	217	18	0.0829493
GO:BP	cellular response to stress	GO:0033554	1866	27543		4.12459e-06	4.12459e-06	742	95	0.128032		1	1	218	26	0.119266
GO:BP	negative regulation of cellular metabolic process	GO:0031324	2670	27543		4.37312e-06	4.37312e-06	547	98	0.179159		1	1	3	2	0.666667
GO:BP	anatomical structure development	GO:0048856	6186	27543		4.41924e-06	4.41924e-06	723	231	0.319502		3.09583e-06	3.09583e-06	217	88	0.40553
GO:BP	positive regulation of transcription, DNA-templated	GO:0045893	1688	27543		4.44508e-06	4.44508e-06	773	91	0.117723		1	1	222	24	0.108108
GO:BP	positive regulation of nucleic acid-templated transcription	GO:1903508	1688	27543		4.44508e-06	4.44508e-06	773	91	0.117723		1	1	222	24	0.108108
GO:BP	positive regulation of RNA biosynthetic process	GO:1902680	1694	27543		5.29416e-06	5.29416e-06	773	91	0.117723		1	1	222	24	0.108108
GO:BP	regulation of biological process	GO:0050789	13329	27543		5.9132e-06	5.9132e-06	764	450	0.589005		0.00184056	0.00184056	213	138	0.647887
GO:BP	multicellular organism development	GO:0007275	5045	27543		6.88802e-06	6.88802e-06	773	207	0.267788		3.70553e-05	3.70553e-05	213	73	0.342723
GO:BP	primary metabolic process	GO:0044238	13120	27543		8.6795e-06	8.6795e-06	769	446	0.579974		1	1	10	6	0.6
GO:BP	animal organ development	GO:0048513	3856	27543		9.17433e-06	9.17433e-06	772	167	0.216321		0.418433	0.418433	217	50	0.230415
GO:BP	organonitrogen compound metabolic process	GO:1901564	6512	27543		1.27486e-05	1.27486e-05	732	241	0.329235		1	1	207	64	0.309179
GO:BP	DNA repair	GO:0006281	511	27543		1.53526e-05	1.53526e-05	769	40	0.0520156		1	1	196	6	0.0306122
GO:BP	cell projection organization	GO:0030030	1627	27543		1.54496e-05	1.54496e-05	773	87	0.112549		0.0487493	0.0487493	192	27	0.140625
GO:BP	embryonic morphogenesis	GO:0048598	641	27543		1.91719e-05	1.91719e-05	772	46	0.0595855		1	1	160	10	0.0625
GO:BP	metabolic process	GO:0008152	14679	27543		1.96867e-05	1.96867e-05	769	487	0.63329		1	1	3	3	1
GO:BP	negative regulation of RNA metabolic process	GO:0051253	1489	27543		2.21129e-05	2.21129e-05	540	63	0.116667		1	1	3	1	0.333333
GO:BP	system development	GO:0048731	4533	27543		2.25518e-05	2.25518e-05	773	188	0.243208		1.27433e-05	1.27433e-05	221	71	0.321267
GO:BP	plasma membrane bounded cell projection organization	GO:0120036	1589	27543		2.31319e-05	2.31319e-05	773	85	0.109961		0.0884459	0.0884459	192	26	0.135417
GO:BP	neuron development	GO:0048666	1241	27543		3.07114e-05	3.07114e-05	773	71	0.0918499		0.00373638	0.00373638	192	25	0.130208
GO:BP	negative regulation of biological process	GO:0048519	5996	27543		3.68134e-05	3.68134e-05	773	234	0.302717		1	1	203	64	0.315271
GO:BP	organic cyclic compound metabolic process	GO:1901360	8713	27543		5.09113e-05	5.09113e-05	777	318	0.409266		1	1	3	2	0.666667
GO:BP	positive regulation of transcription by RNA polymerase II	GO:0045944	1284	27543		5.43319e-05	5.43319e-05	773	72	0.0931436		1	1	222	21	0.0945946
GO:BP	cellular response to DNA damage stimulus	GO:0006974	791	27543		8.63938e-05	8.63938e-05	769	51	0.0663199		1	1	100	5	0.05
GO:BP	negative regulation of nucleobase-containing compound metabolic process	GO:0045934	1620	27543		9.39564e-05	9.39564e-05	540	65	0.12037		1	1	3	1	0.333333
GO:BP	chromosome organization	GO:0051276	1021	27543		9.79247e-05	9.79247e-05	742	59	0.0795148		1	1	96	7	0.0729167
GO:BP	organic substance metabolic process	GO:0071704	14240	27543		0.000105305	0.000105305	737	453	0.614654		1	1	3	3	1
GO:BP	cellular aromatic compound metabolic process	GO:0006725	8487	27543		0.000128854	0.000128854	777	309	0.397683		1	1	3	2	0.666667
GO:BP	negative regulation of transcription by RNA polymerase II	GO:0000122	971	27543		0.000157198	0.000157198	602	49	0.0813953		1	1	188	12	0.0638298
GO:BP	negative regulation of biosynthetic process	GO:0009890	1720	27543		0.000171157	0.000171157	585	71	0.121368		1	1	3	1	0.333333
GO:BP	pattern specification process	GO:0007389	452	27543		0.000197495	0.000197495	772	35	0.0453368		1	1	213	6	0.028169
GO:BP	anatomical structure morphogenesis	GO:0009653	2781	27543		0.00019789	0.00019789	773	125	0.161708		0.00188593	0.00188593	178	40	0.224719
GO:BP	nitrogen compound metabolic process	GO:0006807	12531	27543		0.000202144	0.000202144	769	422	0.548765		1	1	10	6	0.6
GO:BP	negative regulation of transcription, DNA-templated	GO:0045892	1375	27543		0.000240372	0.000240372	540	57	0.105556		1	1	3	1	0.333333
GO:BP	heterocycle metabolic process	GO:0046483	8407	27543		0.000248529	0.000248529	777	305	0.392535		1	1	3	2	0.666667
GO:BP	negative regulation of nucleic acid-templated transcription	GO:1903507	1377	27543		0.000252307	0.000252307	540	57	0.105556		1	1	3	1	0.333333
GO:BP	negative regulation of RNA biosynthetic process	GO:1902679	1378	27543		0.000258483	0.000258483	540	57	0.105556		1	1	3	1	0.333333
GO:BP	regulation of cellular component organization	GO:0051128	2398	27543		0.000329897	0.000329897	731	106	0.145007		0.00122372	0.00122372	194	39	0.201031
GO:BP	cellular nitrogen compound metabolic process	GO:0034641	9118	27543		0.000352553	0.000352553	725	306	0.422069		1	1	3	2	0.666667
GO:BP	peripheral nervous system neuron differentiation	GO:0048934	11	27543		0.000381595	0.000381595	2	2	1		1	1	-1	-1	1
GO:BP	peripheral nervous system neuron development	GO:0048935	11	27543		0.000381595	0.000381595	2	2	1		1	1	-1	-1	1
GO:BP	positive regulation of cellular component organization	GO:0051130	1149	27543		0.000475817	0.000475817	741	62	0.0836707		0.0110481	0.0110481	192	23	0.119792
GO:BP	cell development	GO:0048468	2426	27543		0.000501674	0.000501674	773	111	0.143596		0.940608	0.940608	196	32	0.163265
GO:BP	animal organ morphogenesis	GO:0009887	1082	27543		0.000550304	0.000550304	772	61	0.0790155		1	1	171	14	0.0818713
GO:BP	embryo development	GO:0009790	1236	27543		0.000574603	0.000574603	772	67	0.0867876		0.6657	0.6657	175	19	0.108571
GO:BP	cell differentiation	GO:0030154	4646	27543		0.000603313	0.000603313	773	185	0.239327		0.00426687	0.00426687	216	64	0.296296
GO:BP	regulation of RNA splicing	GO:0043484	164	27543		0.000724002	0.000724002	635	17	0.0267717		1	1	6	1	0.166667
GO:BP	negative regulation of nitrogen compound metabolic process	GO:0051172	2539	27543		0.000905668	0.000905668	547	87	0.159049		1	1	3	2	0.666667
GO:BP	cellular developmental process	GO:0048869	4678	27543		0.000971638	0.000971638	773	185	0.239327		0.00540284	0.00540284	216	64	0.296296
GO:BP	negative regulation of cellular biosynthetic process	GO:0031327	1677	27543		0.00114935	0.00114935	547	64	0.117002		1	1	216	17	0.0787037
GO:BP	tissue development	GO:0009888	2046	27543		0.00118015	0.00118015	772	96	0.124352		1	1	172	24	0.139535
GO:BP	negative regulation of macromolecule biosynthetic process	GO:0010558	1613	27543		0.00139236	0.00139236	547	62	0.113346		1	1	3	1	0.333333
GO:BP	organic substance catabolic process	GO:1901575	2069	27543		0.00155939	0.00155939	758	95	0.12533		1	1	113	13	0.115044
GO:BP	regionalization	GO:0003002	349	27543		0.00195145	0.00195145	772	28	0.0362694		1	1	213	4	0.0187793
GO:BP	small molecule metabolic process	GO:0044281	1778	27543		0.00197907	0.00197907	719	81	0.112656		1	1	2	1	0.5
GO:BP	telomere maintenance via telomere lengthening	GO:0010833	77	27543		0.00204338	0.00204338	725	12	0.0165517		1	1	-1	-1	1
GO:BP	embryonic organ development	GO:0048568	502	27543		0.00237559	0.00237559	772	35	0.0453368		1	1	156	8	0.0512821
GO:BP	cellular component organization or biogenesis	GO:0071840	7543	27543		0.00271601	0.00271601	678	242	0.356932		0.0306167	0.0306167	187	78	0.417112
GO:BP	brain development	GO:0007420	763	27543		0.00300635	0.00300635	772	46	0.0595855		1	1	192	13	0.0677083
GO:BP	embryonic organ morphogenesis	GO:0048562	316	27543		0.00301004	0.00301004	772	26	0.0336788		1	1	154	5	0.0324675
GO:BP	regulation of DNA metabolic process	GO:0051052	497	27543		0.00361518	0.00361518	725	33	0.0455172		1	1	175	8	0.0457143
GO:BP	fatty acid oxidation	GO:0019395	121	27543		0.00367386	0.00367386	569	13	0.0228471		1	1	-1	-1	1
GO:BP	toxin transport	GO:1901998	51	27543		0.00391024	0.00391024	444	8	0.018018		1	1	199	2	0.0100503
GO:BP	central nervous system neuron differentiation	GO:0021953	193	27543		0.00401721	0.00401721	678	18	0.0265487		1	1	187	3	0.0160428
GO:BP	positive regulation of DNA metabolic process	GO:0051054	298	27543		0.00520833	0.00520833	636	22	0.0345912		1	1	96	4	0.0416667
GO:BP	nucleobase-containing compound metabolic process	GO:0006139	8271	27543		0.0053636	0.0053636	777	293	0.377091		1	1	3	2	0.666667
GO:BP	negative regulation of metabolic process	GO:0009892	3558	27543		0.00582455	0.00582455	547	109	0.199269		1	1	3	2	0.666667
GO:BP	cellular component organization	GO:0016043	7353	27543		0.00596166	0.00596166	678	235	0.346608		0.043617	0.043617	196	79	0.403061
GO:BP	neuron projection development	GO:0031175	1085	27543		0.00621232	0.00621232	773	58	0.0750323		0.00120066	0.00120066	192	24	0.125
GO:BP	cell cycle	GO:0007049	1767	27543		0.00633445	0.00633445	336	45	0.133929		1	1	100	10	0.1
GO:BP	organic cyclic compound catabolic process	GO:1901361	489	27543		0.0066221	0.0066221	758	33	0.0435356		1	1	175	4	0.0228571
GO:BP	histone modification	GO:0016570	514	27543		0.00684045	0.00684045	722	33	0.0457064		1	1	222	9	0.0405405
GO:BP	telomere maintenance via telomerase	GO:0007004	62	27543		0.00686694	0.00686694	390	8	0.0205128		1	1	-1	-1	1
GO:BP	lipid oxidation	GO:0034440	128	27543		0.00695047	0.00695047	569	13	0.0228471		1	1	-1	-1	1
GO:BP	head development	GO:0060322	813	27543		0.00723577	0.00723577	772	47	0.0608808		1	1	192	15	0.078125
GO:BP	RNA-templated DNA biosynthetic process	GO:0006278	63	27543		0.00776947	0.00776947	390	8	0.0205128		1	1	-1	-1	1
GO:BP	pteridine-containing compound biosynthetic process	GO:0042559	14	27543		0.00897969	0.00897969	501	5	0.00998004		1	1	-1	-1	1
GO:BP	protein stabilization	GO:0050821	192	27543		0.00903545	0.00903545	650	17	0.0261538		1	1	126	1	0.00793651
GO:BP	localization	GO:0051179	6297	27543		0.00960781	0.00960781	764	228	0.298429		0.11874	0.11874	207	72	0.347826
GO:BP	positive regulation of transcription regulatory region DNA binding	GO:2000679	24	27543		0.0114772	0.0114772	4	2	0.5		1	1	-1	-1	1
GO:BP	axon development	GO:0061564	516	27543		0.0128456	0.0128456	741	33	0.0445344		0.141061	0.141061	192	13	0.0677083
GO:BP	cellular process	GO:0009987	21177	27543		0.0128972	0.0128972	759	633	0.833992		1	1	110	95	0.863636
GO:BP	regulation of protein stability	GO:0031647	308	27543		0.0142367	0.0142367	655	22	0.0335878		1	1	2	1	0.5
GO:BP	double-strand break repair	GO:0006302	259	27543		0.0153423	0.0153423	725	21	0.0289655		1	1	164	2	0.0121951
GO:BP	aromatic compound catabolic process	GO:0019439	464	27543		0.0162359	0.0162359	758	31	0.0408971		1	1	175	4	0.0228571
GO:BP	anterior/posterior pattern specification	GO:0009952	214	27543		0.0173562	0.0173562	678	18	0.0265487		1	1	213	4	0.0187793
GO:BP	cellular response to growth factor stimulus	GO:0071363	693	27543		0.0173683	0.0173683	98	12	0.122449		0.049341	0.049341	210	17	0.0809524
GO:BP	cell cycle G1/S phase transition	GO:0044843	227	27543		0.0174507	0.0174507	769	20	0.0260078		1	1	188	6	0.0319149
GO:BP	peripheral nervous system development	GO:0007422	73	27543		0.0182333	0.0182333	2	2	1		1	1	192	1	0.00520833
GO:BP	positive regulation of establishment of protein localization to telomere	GO:1904851	10	27543		0.0204499	0.0204499	390	4	0.0102564		1	1	-1	-1	1
GO:BP	telomere organization	GO:0032200	143	27543		0.0205387	0.0205387	742	15	0.0202156		1	1	-1	-1	1
GO:BP	regulation of DNA-binding transcription factor activity	GO:0051090	414	27543		0.0214026	0.0214026	389	19	0.0488432		1	1	138	5	0.0362319
GO:BP	macromolecule modification	GO:0043412	3898	27543		0.0221828	0.0221828	750	149	0.198667		0.138143	0.138143	222	53	0.238739
GO:BP	cellular localization	GO:0051641	2840	27543		0.0243147	0.0243147	655	103	0.157252		1	1	162	24	0.148148
GO:BP	spinal cord association neuron differentiation	GO:0021527	13	27543		0.0256024	0.0256024	678	5	0.00737463		1	1	-1	-1	1
GO:BP	response to growth factor	GO:0070848	721	27543		0.025844	0.025844	98	12	0.122449		0.0808745	0.0808745	210	17	0.0809524
GO:BP	regulation of establishment of protein localization to telomere	GO:0070203	11	27543		0.0317762	0.0317762	390	4	0.0102564		1	1	-1	-1	1
GO:BP	epithelial tube morphogenesis	GO:0060562	360	27543		0.0320089	0.0320089	772	26	0.0336788		1	1	39	3	0.0769231
GO:BP	regulation of DNA repair	GO:0006282	161	27543		0.0322499	0.0322499	769	16	0.0208062		1	1	164	4	0.0243902
GO:BP	G1/S transition of mitotic cell cycle	GO:0000082	198	27543		0.0325253	0.0325253	769	18	0.023407		1	1	188	6	0.0319149
GO:BP	DNA recombination	GO:0006310	310	27543		0.0353191	0.0353191	742	23	0.0309973		1	1	164	2	0.0121951
GO:BP	negative regulation of reactive oxygen species metabolic process	GO:2000378	51	27543		0.0364056	0.0364056	602	8	0.013289		1	1	-1	-1	1
GO:BP	small molecule catabolic process	GO:0044282	369	27543		0.0384292	0.0384292	670	24	0.0358209		1	1	-1	-1	1
GO:BP	cell differentiation in spinal cord	GO:0021515	60	27543		0.0399205	0.0399205	678	9	0.0132743		1	1	-1	-1	1
GO:BP	purine-containing compound catabolic process	GO:0072523	57	27543		0.0413587	0.0413587	719	9	0.0125174		1	1	-1	-1	1
GO:BP	cellular nitrogen compound catabolic process	GO:0044270	440	27543		0.0413778	0.0413778	758	29	0.0382586		1	1	175	4	0.0228571
GO:BP	protein deacetylation	GO:0006476	123	27543		0.0444987	0.0444987	602	12	0.0199336		1	1	-1	-1	1
GO:BP	fatty acid catabolic process	GO:0009062	110	27543		0.0470813	0.0470813	569	11	0.0193322		1	1	-1	-1	1
GO:BP	regulation of establishment of protein localization to chromosome	GO:0070202	12	27543		0.0471314	0.0471314	390	4	0.0102564		1	1	-1	-1	1
GO:BP	protein modification process	GO:0036211	3707	27543		0.0489042	0.0489042	730	138	0.189041		0.145816	0.145816	222	51	0.22973
GO:BP	cellular protein modification process	GO:0006464	3707	27543		0.0489042	0.0489042	730	138	0.189041		0.145816	0.145816	222	51	0.22973
GO:BP	cell morphogenesis	GO:0000902	1086	27543		0.36786	0.36786	773	52	0.0672704		0.00115263	0.00115263	178	23	0.129213
GO:BP	regulation of cell population proliferation	GO:0042127	1764	27543		0.455917	0.455917	81	15	0.185185		0.00351566	0.00351566	192	31	0.161458
GO:BP	cell death	GO:0008219	2208	27543		0.777312	0.777312	769	89	0.115735		0.0268295	0.0268295	87	20	0.229885
GO:BP	cellular component morphogenesis	GO:0032989	821	27543		1	1	175	12	0.0685714		0.000632026	0.000632026	192	21	0.109375
GO:BP	cell projection morphogenesis	GO:0048858	696	27543		1	1	741	34	0.0458839		0.000901526	0.000901526	192	19	0.0989583
GO:BP	regulation of multicellular organismal process	GO:0051239	2854	27543		1	1	28	7	0.25		0.00113301	0.00113301	134	34	0.253731
GO:BP	regulation of cell communication	GO:0010646	3453	27543		1	1	184	34	0.184783		0.00161112	0.00161112	193	49	0.253886
GO:BP	cell part morphogenesis	GO:0032990	726	27543		1	1	741	34	0.0458839		0.00169356	0.00169356	192	19	0.0989583
GO:BP	regulation of signaling	GO:0023051	3463	27543		1	1	184	35	0.190217		0.00175393	0.00175393	193	49	0.253886
GO:BP	enzyme-linked receptor protein signaling pathway	GO:0007167	956	27543		1	1	104	11	0.105769		0.00242326	0.00242326	210	23	0.109524
GO:BP	neuron projection morphogenesis	GO:0048812	676	27543		1	1	741	33	0.0445344		0.00261193	0.00261193	192	18	0.09375
GO:BP	plasma membrane bounded cell projection morphogenesis	GO:0120039	691	27543		1	1	741	34	0.0458839		0.00355805	0.00355805	192	18	0.09375
GO:BP	cellular response to chemical stimulus	GO:0070887	3457	27543		1	1	315	55	0.174603		0.00401259	0.00401259	221	53	0.239819
GO:BP	regulation of synapse organization	GO:0050807	251	27543		1	1	277	6	0.0216607		0.00427427	0.00427427	93	8	0.0860215
GO:BP	transmembrane receptor protein tyrosine kinase signaling pathway	GO:0007169	598	27543		1	1	173	9	0.0520231		0.00442343	0.00442343	85	11	0.129412
GO:BP	cellular response to organic substance	GO:0071310	2794	27543		1	1	4	3	0.75		0.00473789	0.00473789	210	44	0.209524
GO:BP	regulation of synapse structure or activity	GO:0050803	258	27543		1	1	277	6	0.0216607		0.00524114	0.00524114	93	8	0.0860215
GO:BP	intracellular signal transduction	GO:0035556	2516	27543		1	1	769	93	0.120936		0.00554396	0.00554396	147	32	0.217687
GO:BP	regulation of protein kinase C activity	GO:1900019	8	27543		1	1	173	1	0.00578035		0.00638096	0.00638096	10	2	0.2
GO:BP	positive regulation of protein kinase C activity	GO:1900020	8	27543		1	1	173	1	0.00578035		0.00638096	0.00638096	10	2	0.2
GO:BP	cell-cell adhesion	GO:0098609	887	27543		1	1	141	10	0.070922		0.00654243	0.00654243	189	20	0.10582
GO:BP	response to cytokine	GO:0034097	1155	27543		1	1	2	1	0.5		0.00656906	0.00656906	77	14	0.181818
GO:BP	synapse assembly	GO:0007416	189	27543		1	1	116	2	0.0172414		0.0112439	0.0112439	140	8	0.0571429
GO:BP	regulation of signal transduction	GO:0009966	2898	27543		1	1	184	32	0.173913		0.0122171	0.0122171	210	44	0.209524
GO:BP	regulation of response to stimulus	GO:0048583	3926	27543		1	1	735	132	0.179592		0.0137364	0.0137364	88	29	0.329545
GO:BP	regulation of biological quality	GO:0065008	4029	27543		1	1	776	144	0.185567		0.021055	0.021055	172	47	0.273256
GO:BP	response to external stimulus	GO:0009605	3104	27543		1	1	215	28	0.130233		0.02503	0.02503	147	35	0.238095
GO:BP	cell adhesion	GO:0007155	1422	27543		1	1	175	19	0.108571		0.027795	0.027795	212	27	0.127358
GO:BP	cell junction assembly	GO:0034329	435	27543		1	1	32	2	0.0625		0.0282713	0.0282713	140	11	0.0785714
GO:BP	positive regulation of transferase activity	GO:0051347	570	27543		1	1	309	15	0.0485437		0.0359312	0.0359312	131	12	0.0916031
GO:BP	response to organic substance	GO:0010033	3750	27543		1	1	132	29	0.219697		0.0387147	0.0387147	146	39	0.267123
GO:BP	positive regulation of kinase activity	GO:0033674	482	27543		1	1	223	9	0.0403587		0.0389395	0.0389395	131	11	0.0839695
GO:BP	regulation of multicellular organismal development	GO:2000026	1494	27543		1	1	4	2	0.5		0.0394239	0.0394239	172	24	0.139535
GO:BP	regulation of synapse assembly	GO:0051963	117	27543		1	1	277	1	0.00361011		0.0457969	0.0457969	134	6	0.0447761
GO:BP	cell population proliferation	GO:0008283	2109	27543		1	1	772	83	0.107513		0.0477836	0.0477836	192	32	0.166667

## Sheet: GO-MF Up
source	term_name	term_id	term_size	effective_domain_size		p_adj_color	adjusted_p_value__CX_Up	query_size__CX_Up	intersection_size__CX_Up	gene_ratio_CX_Up		p_adj_color	adjusted_p_value__CB_Up	query_size__CB_Up	intersection_size__CB_Up	gene_ratio_CB_Up
GO:MF	binding	GO:0005488	16232	25412		6.07e-14	6.07e-14	761	590	0.775296		1	1	214	156	0.728972
GO:MF	protein binding	GO:0005515	10481	25412		2.07e-13	2.07e-13	744	415	0.557796		0.00295284	0.00295284	222	125	0.563063
GO:MF	catalytic activity	GO:0003824	5730	25412		4.93e-12	4.93e-12	756	262	0.346561		1	1	30	14	0.466667
GO:MF	DNA binding	GO:0003677	2406	25412		2.76e-11	2.76e-11	777	140	0.18018		1	1	222	35	0.157658
GO:MF	ion binding	GO:0043167	5914	25412		6.89e-11	6.89e-11	756	264	0.349206		1	1	214	66	0.308411
GO:MF	sequence-specific DNA binding	GO:0043565	1607	25412		3.67e-10	3.67e-10	777	103	0.132561		1	1	222	25	0.112613
GO:MF	sequence-specific double-stranded DNA binding	GO:1990837	1502	25412		1.57e-08	1.57e-08	777	94	0.120978		1	1	222	24	0.108108
GO:MF	heterocyclic compound binding	GO:1901363	6837	25412		3.26e-08	3.26e-08	763	286	0.374836		1	1	3	2	0.666667
GO:MF	double-stranded DNA binding	GO:0003690	1601	25412		4.39e-08	4.39e-08	777	97	0.124839		1	1	222	25	0.112613
GO:MF	nucleotide binding	GO:0000166	2188	25412		5.43e-08	5.43e-08	675	109	0.161481		1	1	38	5	0.131579
GO:MF	nucleoside phosphate binding	GO:1901265	2188	25412		5.43e-08	5.43e-08	675	109	0.161481		1	1	38	5	0.131579
GO:MF	organic cyclic compound binding	GO:0097159	6918	25412		1.05e-07	1.05e-07	678	259	0.382006		1	1	3	2	0.666667
GO:MF	transcription regulator activity	GO:0140110	1811	25412		7.67e-07	7.67e-07	777	102	0.131274		1	1	222	24	0.108108
GO:MF	transcription regulatory region nucleic acid binding	GO:0001067	1428	25412		7.79e-07	7.79e-07	777	86	0.110682		1	1	222	23	0.103604
GO:MF	RNA polymerase II transcription regulatory region sequence-specific DNA binding	GO:0000977	1327	25412		1.33087e-06	1.33087e-06	777	81	0.104247		1	1	222	21	0.0945946
GO:MF	transcription cis-regulatory region binding	GO:0000976	1424	25412		1.48877e-06	1.48877e-06	777	85	0.109395		1	1	222	23	0.103604
GO:MF	DNA-binding transcription factor activity, RNA polymerase II-specific	GO:0000981	1286	25412		1.60462e-06	1.60462e-06	777	79	0.101673		1	1	222	19	0.0855856
GO:MF	DNA-binding transcription factor activity	GO:0003700	1362	25412		1.97451e-06	1.97451e-06	777	82	0.105534		1	1	222	19	0.0855856
GO:MF	chromatin binding	GO:0003682	606	25412		2.01292e-06	2.01292e-06	688	44	0.0639535		1	1	6	2	0.333333
GO:MF	cation binding	GO:0043169	4191	25412		6.98985e-06	6.98985e-06	746	182	0.243968		0.155571	0.155571	214	56	0.261682
GO:MF	small molecule binding	GO:0036094	2561	25412		2.36218e-05	2.36218e-05	675	113	0.167407		1	1	38	6	0.157895
GO:MF	GTP binding	GO:0005525	387	25412		3.27383e-05	3.27383e-05	147	14	0.0952381		1	1	126	1	0.00793651
GO:MF	metal ion binding	GO:0046872	4091	25412		4.32287e-05	4.32287e-05	746	175	0.234584		0.0814958	0.0814958	214	56	0.261682
GO:MF	cis-regulatory region sequence-specific DNA binding	GO:0000987	1128	25412		4.45157e-05	4.45157e-05	777	68	0.0875161		1	1	222	18	0.0810811
GO:MF	identical protein binding	GO:0042802	2299	25412		5.90214e-05	5.90214e-05	737	110	0.149254		1	1	119	17	0.142857
GO:MF	guanyl nucleotide binding	GO:0019001	410	25412		6.64923e-05	6.64923e-05	147	14	0.0952381		1	1	126	1	0.00793651
GO:MF	guanyl ribonucleotide binding	GO:0032561	410	25412		6.64923e-05	6.64923e-05	147	14	0.0952381		1	1	126	1	0.00793651
GO:MF	RNA polymerase II cis-regulatory region sequence-specific DNA binding	GO:0000978	1105	25412		9.75547e-05	9.75547e-05	777	66	0.0849421		1	1	222	18	0.0810811
GO:MF	carbohydrate derivative binding	GO:0097367	2278	25412		0.00014855	0.00014855	263	50	0.190114		1	1	38	5	0.131579
GO:MF	hydrolase activity	GO:0016787	2460	25412		0.000188795	0.000188795	771	118	0.153048		1	1	27	5	0.185185
GO:MF	ribonucleotide binding	GO:0032553	1938	25412		0.000207197	0.000207197	258	44	0.170543		1	1	38	4	0.105263
GO:MF	anion binding	GO:0043168	2439	25412		0.000457605	0.000457605	675	104	0.154074		1	1	38	6	0.157895
GO:MF	transcription factor binding	GO:0008134	612	25412		0.000499432	0.000499432	772	42	0.0544041		1	1	164	4	0.0243902
GO:MF	nucleoside-triphosphatase activity	GO:0017111	672	25412		0.000729631	0.000729631	495	33	0.0666667		1	1	126	1	0.00793651
GO:MF	pyrophosphatase activity	GO:0016462	725	25412		0.000827161	0.000827161	296	25	0.0844595		1	1	126	1	0.00793651
GO:MF	hydrolase activity, acting on acid anhydrides, in phosphorus-containing anhydrides	GO:0016818	728	25412		0.00089039	0.00089039	296	25	0.0844595		1	1	126	1	0.00793651
GO:MF	hydrolase activity, acting on acid anhydrides	GO:0016817	728	25412		0.00089039	0.00089039	296	25	0.0844595		1	1	126	1	0.00793651
GO:MF	purine ribonucleotide binding	GO:0032555	1919	25412		0.00102512	0.00102512	258	42	0.162791		1	1	38	4	0.105263
GO:MF	protein folding chaperone	GO:0044183	39	25412		0.00102914	0.00102914	390	7	0.0179487		1	1	-1	-1	1
GO:MF	purine nucleotide binding	GO:0017076	1934	25412		0.00124899	0.00124899	258	42	0.162791		1	1	38	4	0.105263
GO:MF	GTPase activity	GO:0003924	321	25412		0.00152361	0.00152361	147	11	0.0748299		1	1	126	1	0.00793651
GO:MF	purine deoxyribonucleotide binding	GO:0032554	6	25412		0.00189237	0.00189237	144	3	0.0208333		1	1	-1	-1	1
GO:MF	ribose phosphate diphosphokinase activity	GO:0004749	6	25412		0.0021318	0.0021318	583	4	0.00686106		1	1	-1	-1	1
GO:MF	RNA polymerase II-specific DNA-binding transcription factor binding	GO:0061629	372	25412		0.00218878	0.00218878	772	29	0.0375648		1	1	164	3	0.0182927
GO:MF	flavin adenine dinucleotide binding	GO:0050660	94	25412		0.00365118	0.00365118	670	12	0.0179104		1	1	-1	-1	1
GO:MF	diphosphotransferase activity	GO:0016778	7	25412		0.00488365	0.00488365	583	4	0.00686106		1	1	-1	-1	1
GO:MF	purine ribonucleoside triphosphate binding	GO:0035639	1839	25412		0.00524992	0.00524992	258	39	0.151163		1	1	38	4	0.105263
GO:MF	deoxyribonucleotide binding	GO:0032552	8	25412		0.00525466	0.00525466	144	3	0.0208333		1	1	-1	-1	1
GO:MF	CTP binding	GO:0002135	2	25412		0.00666897	0.00666897	90	2	0.0222222		1	1	-1	-1	1
GO:MF	DNA-binding transcription factor binding	GO:0140297	498	25412		0.0146991	0.0146991	772	33	0.0427461		1	1	210	4	0.0190476
GO:MF	NF-kappaB binding	GO:0051059	32	25412		0.015987	0.015987	291	5	0.0171821		1	1	-1	-1	1
GO:MF	DNA-binding transcription activator activity, RNA polymerase II-specific	GO:0001228	504	25412		0.0164329	0.0164329	4	3	0.75		1	1	222	10	0.045045
GO:MF	nucleic acid binding	GO:0003676	4721	25412		0.0165575	0.0165575	777	189	0.243243		1	1	6	3	0.5
GO:MF	DNA-binding transcription activator activity	GO:0001216	510	25412		0.0170249	0.0170249	4	3	0.75		1	1	222	10	0.045045
GO:MF	sulfonylurea receptor binding	GO:0017098	3	25412		0.0199607	0.0199607	90	2	0.0222222		1	1	-1	-1	1
GO:MF	tubulin binding	GO:0015631	370	25412		0.0220889	0.0220889	338	16	0.0473373		1	1	2	1	0.5
GO:MF	unfolded protein binding	GO:0051082	90	25412		0.0293968	0.0293968	274	7	0.0255474		1	1	-1	-1	1
GO:MF	cytoskeletal protein binding	GO:0008092	1003	25412		0.0327816	0.0327816	349	30	0.0859599		1	1	187	16	0.0855615
GO:MF	UTP binding	GO:0002134	4	25412		0.0398293	0.0398293	90	2	0.0222222		1	1	-1	-1	1
GO:MF	dATP binding	GO:0032564	4	25412		0.0398293	0.0398293	90	2	0.0222222		1	1	-1	-1	1
GO:MF	phosphoprotein binding	GO:0051219	105	25412		0.130002	0.130002	210	6	0.0285714		0.0377575	0.0377575	3	2	0.666667
GO:MF	metal ion transmembrane transporter activity	GO:0046873	417	25412		1	1	22	1	0.0454545		0.013511	0.013511	220	14	0.0636364
